# Supplementary material for: Distinct roles for MNK1 and MNK2 in social and cognitive behavior through kinase-specific regulation of the synaptic proteome and phosphoproteome
Source: Springer Nature journal article supplement (doi:10.1038/s41380-026-03483-w), 2026-02-13
Supplement: MOESM2 [file 41380_2026_3483_MOESM2_ESM.pdf › 41380_2026_3483_MOESM2_ESM.pdf]

| Test                                                   | Sample Size                                                                                                                                                              | Statistical test                                              | Values                                                                                                                                                                                                                                                                                                                                                                             |
|--------------------------------------------------------|--------------------------------------------------------------------------------------------------------------------------------------------------------------------------|---------------------------------------------------------------|------------------------------------------------------------------------------------------------------------------------------------------------------------------------------------------------------------------------------------------------------------------------------------------------------------------------------------------------------------------------------------|
| <b>wild-type, MNK1<sup>KO</sup>, MNK2<sup>KO</sup></b> |                                                                                                                                                                          |                                                               |                                                                                                                                                                                                                                                                                                                                                                                    |
| Social Habituation test                                | <i>females:</i><br>wild-type=10<br>MNK1 <sup>KO</sup> =8<br>MNK2 <sup>KO</sup> =12<br><br><i>males:</i><br>wild-type=7<br>MNK1 <sup>KO</sup> =6<br>MNK2 <sup>KO</sup> =5 | Three-way Repeated Measures ANOVA                             | Genotype: $F_{(2, 42)}=0.28$ , $P=0.760$<br>Sex: $F_{(1, 42)}=1.19$ , $P=0.2820$<br>genotype x Sex $F_{(2, 42)}=1.63$ , $P=0.2080$<br>trials: $F_{(3.35, 140.79)}=81.16$ , $P<0.0001$<br>genotype x trials: $F_{(6.7, 140.79)}=1.887$ , $P=0.0820$<br>Sex x trials $F_{(3.35, 140.79)}=0.86$ , $P=0.4720$<br>Sex x trials x genotype $F_{(6.7, 140.79)}=0.67$ , $P=0.6880$         |
| Social recognition index                               | <i>females:</i><br>wild-type=10<br>MNK1 <sup>KO</sup> =8<br>MNK2 <sup>KO</sup> =12<br><br><i>males:</i><br>wild-type=7<br>MNK1 <sup>KO</sup> =6<br>MNK2 <sup>KO</sup> =5 | Two-way ANOVA, Tukey's post-hoc test for multiple comparisons | Interaction: $F_{(2, 42)} = 0.2222$ , $P=0.8017$<br>Sex: $F_{(1, 42)} = 0.2822$ , $P=0.5980$<br>Genotype: $F_{(2, 42)} = 6.141$ , $P=0.0046$<br><br>wild-type vs MNK1 <sup>KO</sup> : $P= 0.0060$<br>wild-type vs MNK2 <sup>KO</sup> : $P= 0.9260$<br>MNK1 <sup>KO</sup> vs MNK2 <sup>KO</sup> : $P = 0.0209$                                                                      |
| Social olfaction                                       | <i>females:</i><br>wild-type=10<br>MNK1 <sup>KO</sup> =8<br>MNK2 <sup>KO</sup> =12<br><br><i>males:</i><br>wild-type=7<br>MNK1 <sup>KO</sup> =7<br>MNK2 <sup>KO</sup> =5 | Three-way Repeated Measures ANOVA                             | Genotype: $F_{(2, 43)} =2.48$ , $P=0.0950$<br>Sex: $F_{(1, 43)} =2.23$ , $P=0.1430$<br>genotype x sex: $F_{(2, 42)} =2.06$ , $P=0.139$<br>trials: $F_{(3.87, 166.45)} =42.84$ , $P<0.0001$<br>genotype x trials: $F_{(7.74, 166.45)} =1.47$ , $P=0.175$<br>Sex x trials: $F_{(3.87, 166.45)} =0.58$ , $P=0.669$<br>Sex x trials x genotype: $F_{(7.74, 166.45)} =1.62$ , $P=0.125$ |
| Object habituation test                                | <i>females:</i><br>wild-type=10<br>MNK1 <sup>KO</sup> =8<br>MNK2 <sup>KO</sup> =12<br><br><i>males:</i><br>wild-type=7<br>MNK1 <sup>KO</sup> =7<br>MNK2 <sup>KO</sup> =5 | Three-way Repeated Measures ANOVA                             | Genotype: $F_{(2, 43)} =9.80$ , $P<0.0001$<br>Sex: $F_{(1, 43)} =0.54$ , $P=0.465$<br>genotype x sex: $F_{(2, 43)} =1.74$ , $P=0.188$<br>trials: $F_{(2.43, 104.6)} =34.96$ , $P<0.0001$<br>genotype x trials: $F_{(4.86, 104.6)} =5.89$ , $P<0.0001$<br>Sex x trials: $F_{(2.43, 104.6)} =0.83$ , $P=0.461$<br>Sex x trials x genotype: $F_{(4.86, 104.6)} =0.61$ , $P=0.689$     |
| Object RI                                              | <i>females:</i><br>wild-type=10<br>MNK1 <sup>KO</sup> =8<br>MNK2 <sup>KO</sup> =12                                                                                       | Two-way ANOVA, Tukey's post-hoc test for multiple comparisons | Interaction: $F_{(2, 43)} = 0.9540$ , $P=0.3932$<br>Sex: $F_{(1, 43)} = 0.6882$ , $P=0.4114$<br>Genotype: $F_{(2, 43)} = 14.51$ , $P<0.0001$                                                                                                                                                                                                                                       |

|                              |                                                                                                                                                                               |                                                                                        |                                                                                                                                                                                                                                                                                                                                                                                                                                                                                                                                                                                                                                                                                                                                                                                                                                                                                                                                                                                                                                                                                                                                                                                                                                                                                                                                                                                                                                                     |
|------------------------------|-------------------------------------------------------------------------------------------------------------------------------------------------------------------------------|----------------------------------------------------------------------------------------|-----------------------------------------------------------------------------------------------------------------------------------------------------------------------------------------------------------------------------------------------------------------------------------------------------------------------------------------------------------------------------------------------------------------------------------------------------------------------------------------------------------------------------------------------------------------------------------------------------------------------------------------------------------------------------------------------------------------------------------------------------------------------------------------------------------------------------------------------------------------------------------------------------------------------------------------------------------------------------------------------------------------------------------------------------------------------------------------------------------------------------------------------------------------------------------------------------------------------------------------------------------------------------------------------------------------------------------------------------------------------------------------------------------------------------------------------------|
|                              | <p><i>males:</i><br/>wild-type=7<br/>MNK1<sup>KO</sup>=7<br/>MNK2<sup>KO</sup>=5</p>                                                                                          |                                                                                        | <p>Wild-type vs MNK1<sup>KO</sup> : P=0.0221<br/>Wild-type vs MNK2<sup>KO</sup> : P=0.0211<br/>MNK1<sup>KO</sup> vs MNK2<sup>KO</sup> : P&lt;0.0001</p>                                                                                                                                                                                                                                                                                                                                                                                                                                                                                                                                                                                                                                                                                                                                                                                                                                                                                                                                                                                                                                                                                                                                                                                                                                                                                             |
| NOR                          | <p><i>females:</i><br/>wild-type=10<br/>MNK1<sup>KO</sup>=8<br/>MNK2<sup>KO</sup>=12</p> <p><i>males:</i><br/>wild-type=7<br/>MNK1<sup>KO</sup>=7<br/>MNK2<sup>KO</sup>=5</p> | Three-way Repeated Measures ANOVA, Bonferroni's post-hoc test for multiple comparisons | <p>Genotype: <math>F_{(2, 43)} = 11.66</math>, <math>P &lt; 0.0001</math><br/>Sex: <math>F_{(1, 43)} = 0.51</math>, <math>P = 0.479</math><br/>Novelty: <math>F_{(1, 43)} = 21.05</math>, <math>P &lt; 0.0001</math><br/>genotype x sex: <math>F_{(2, 43)} = 3.23</math>, <math>P = 0.049</math><br/>genotype x novelty: <math>F_{(2, 43)} = 4.62</math>, <math>P = 0.015</math><br/>Sex x novelty: <math>F_{(1, 43)} = 0.70</math>, <math>P = 0.409</math><br/>Sex x novelty x genotype: <math>F_{(2, 43)} = 0.52</math>, <math>P = 0.596</math></p> <p><u>Post-hoc: Novelty x genotype</u><br/><i>Familiar vs novel object</i><br/>Wild-type: <math>P = 0.004</math><br/>MNK1<sup>KO</sup>: <math>P = 0.772</math><br/>MNK2<sup>KO</sup>: <math>P = 0.003</math></p> <p><u>Post-hoc: Novelty x sex</u><br/><i>female</i><br/>Wild-type vs MNK1<sup>KO</sup> : <math>P = 0.0056</math><br/>Wild-type vs MNK2<sup>KO</sup> : <math>P = 0.056</math><br/>MNK1<sup>KO</sup> vs MNK2<sup>KO</sup> : <math>P &lt; 0.0001</math></p> <p><i>male</i><br/>Wild-type vs MNK1<sup>KO</sup> : <math>P = 0.158</math><br/>Wild-type vs MNK2<sup>KO</sup> : <math>P &gt; 0.9999</math><br/>MNK1<sup>KO</sup> vs MNK2<sup>KO</sup> : <math>P = 0.687</math></p> <p><u>Post-hoc: Novelty x sex</u><br/><i>Female vs male</i><br/>Wild-type: <math>P = 0.38</math><br/>MNK1<sup>KO</sup>: <math>P = 0.017</math><br/>MNK2<sup>KO</sup>: <math>P = 0.115</math></p> |
| NOR RI                       | <p><i>females:</i><br/>wild-type=10<br/>MNK1<sup>KO</sup>=8<br/>MNK2<sup>KO</sup>=12</p> <p><i>males:</i><br/>wild-type=7<br/>MNK1<sup>KO</sup>=7<br/>MNK2<sup>KO</sup>=5</p> | Two-way ANOVA, Tukey's post-hoc test for multiple comparisons                          | <p>Interaction: <math>F_{(2, 43)} = 0.8828</math>, <math>P = 0.4210</math><br/>Sex: <math>F_{(1, 43)} = 1.423</math>, <math>P = 0.2394</math><br/>Genotype: <math>F_{(2, 43)} = 5.574</math>, <math>P = 0.0070</math></p> <p>Wild-type vs MNK1<sup>KO</sup> : <math>P = 0.0497</math><br/>Wild-type vs MNK2<sup>KO</sup> : <math>P = 0.6531</math><br/>MNK1<sup>KO</sup> vs MNK2<sup>KO</sup> : <math>P = 0.0071</math></p>                                                                                                                                                                                                                                                                                                                                                                                                                                                                                                                                                                                                                                                                                                                                                                                                                                                                                                                                                                                                                         |
| Open field distance traveled | <p><i>females:</i><br/>wild-type=10<br/>MNK1<sup>KO</sup>=6<br/>MNK2<sup>KO</sup>=12</p> <p><i>males:</i><br/>wild-type=6<br/>MNK1<sup>KO</sup>=7<br/>MNK2<sup>KO</sup>=5</p> | Two-way ANOVA                                                                          | <p>Interaction: <math>F_{(2, 40)} = 2.049</math>, <math>P = 0.1422</math><br/>Sex: <math>F_{(1, 40)} = 0.01534</math>, <math>P = 0.9020</math><br/>Genotype: <math>F_{(2, 40)} = 2.453</math>, <math>P = 0.0989</math></p>                                                                                                                                                                                                                                                                                                                                                                                                                                                                                                                                                                                                                                                                                                                                                                                                                                                                                                                                                                                                                                                                                                                                                                                                                          |

|                                  |                                                                                                                                                                 |                                                                                        |                                                                                                                                                                                                                                                                                                                                                                                                                                                                                                                                                                         |
|----------------------------------|-----------------------------------------------------------------------------------------------------------------------------------------------------------------|----------------------------------------------------------------------------------------|-------------------------------------------------------------------------------------------------------------------------------------------------------------------------------------------------------------------------------------------------------------------------------------------------------------------------------------------------------------------------------------------------------------------------------------------------------------------------------------------------------------------------------------------------------------------------|
| Time in center                   | <p>females:<br/>wild-type=10<br/>MNK1<sup>KO</sup>=6<br/>MNK2<sup>KO</sup>=12</p> <p>males:<br/>wild-type=6<br/>MNK1<sup>KO</sup>=7<br/>MNK2<sup>KO</sup>=5</p> | Two-way ANOVA                                                                          | <p>Interaction: <math>F_{(2, 40)} = 0.1024</math>, <math>P=0.9029</math></p> <p>Sex: <math>F_{(1, 40)} = 2.415</math>, <math>P=0.1281</math></p> <p>Genotype: <math>F_{(2, 40)} = 0.1471</math>, <math>P=0.8637</math></p>                                                                                                                                                                                                                                                                                                                                              |
| wild type, MNK1/2 <sup>DKO</sup> |                                                                                                                                                                 |                                                                                        |                                                                                                                                                                                                                                                                                                                                                                                                                                                                                                                                                                         |
| Social Habituation test          | <p>females:<br/>wild-type=8<br/>MNK1/2<sup>DKO</sup> =8</p> <p>males:<br/>wild-type=5<br/>MNK1/2<sup>DKO</sup> =7</p>                                           | Three-way Repeated Measures ANOVA                                                      | <p>Genotype: <math>F_{(1, 24)} = 0.18</math>, <math>P=0.671</math></p> <p>Sex: <math>F_{(1, 24)} = 3.51</math>, <math>P=0.073</math></p> <p>genotype x sex: <math>F_{(1, 24)} = 0.27</math>, <math>P=0.607</math></p> <p>trials: <math>F_{(2.6, 62.31)} = 30.47</math>, <math>P&lt;0.0001</math></p> <p>genotype x trials: <math>F_{(2.6, 62.31)} = 0.3</math>, <math>P=0.794</math></p> <p>Sex x trials: <math>F_{(2.6, 62.31)} = 0.74</math>, <math>P=0.516</math></p> <p>Sex x trials x genotype <math>F_{(2.6, 62.31)} = 2.57</math>, <math>P=0.07</math></p>       |
| Social recognition index         | <p>females:<br/>wild-type=8<br/>MNK1/2<sup>DKO</sup> =8</p> <p>males:<br/>wild-type=5<br/>MNK1/2<sup>DKO</sup> =7</p>                                           | Two-way ANOVA                                                                          | <p>Interaction: <math>F_{(1, 24)} = 0.06461</math>, <math>P=0.8015</math></p> <p>Sex: <math>F_{(1, 24)} = 1.246</math>, <math>P=0.2753</math></p> <p>Genotype: <math>F_{(1, 24)} = 0.001524</math>, <math>P=0.9692</math></p>                                                                                                                                                                                                                                                                                                                                           |
| Social olfaction                 | <p>females:<br/>wild-type=8<br/>MNK1/2<sup>DKO</sup> =8</p> <p>males:<br/>wild-type=5<br/>MNK1/2<sup>DKO</sup> =8</p>                                           | Three-way Repeated Measures ANOVA                                                      | <p>Genotype: <math>F_{(1, 25)} = 0.83</math>, <math>P=0.371</math></p> <p>Sex: <math>F_{(1, 25)} = 0.9</math>, <math>P=0.351</math></p> <p>genotype x sex: <math>F_{(1, 25)} = 3.51</math>, <math>P=0.073</math></p> <p>trials: <math>F_{(3.96, 98.97)} = 18.17</math>, <math>P&lt;0.0001</math></p> <p>genotype x trials: <math>F_{(3.96, 98.97)} = 0.38</math>, <math>P=0.819</math></p> <p>Sex x trials: <math>F_{(3.96, 98.97)} = 0.42</math>, <math>P=0.791</math></p> <p>Sex x trials x genotype <math>F_{(3.96, 98.97)} = 0.69</math>, <math>P=0.602</math></p>  |
| Object Habituation test          | <p>females:<br/>wild-type=8<br/>MNK1/2<sup>DKO</sup> =8</p> <p>males:<br/>wild-type=5<br/>MNK1/2<sup>DKO</sup> =8</p>                                           | Three-way Repeated Measures ANOVA, Bonferroni's post-hoc test for multiple comparisons | <p>Genotype: <math>F_{(1, 25)} = 0.69</math>, <math>P=0.415</math></p> <p>Sex: <math>F_{(1, 25)} = 4.49</math>, <math>P=0.044</math></p> <p>genotype x sex: <math>F_{(1, 25)} = 0.85</math>, <math>P=0.364</math></p> <p>trials: <math>F_{(2.42, 60.55)} = 24.34</math>, <math>P&lt;0.0001</math></p> <p>genotype x trials: <math>F_{(2.42, 60.55)} = 0.49</math>, <math>P=0.652</math></p> <p>Sex x trials: <math>F_{(2.42, 60.55)} = 1.27</math>, <math>P=0.292</math></p> <p>Sex x trials x genotype <math>F_{(2.42, 60.55)} = 4.29</math>, <math>P=0.013</math></p> |

|                          |                                                                                                                           |                                   |                                                                                                                                                                                                                                                                                                                                                                                                                                                                                                                                                                                                                                                                                                                                                                                                                                                                                                                     |
|--------------------------|---------------------------------------------------------------------------------------------------------------------------|-----------------------------------|---------------------------------------------------------------------------------------------------------------------------------------------------------------------------------------------------------------------------------------------------------------------------------------------------------------------------------------------------------------------------------------------------------------------------------------------------------------------------------------------------------------------------------------------------------------------------------------------------------------------------------------------------------------------------------------------------------------------------------------------------------------------------------------------------------------------------------------------------------------------------------------------------------------------|
|                          |                                                                                                                           |                                   | <p><u>Trial 1:</u><br/> WT f vs DKO f: P=0.136<br/> DKO f vs WT m: P=0.157<br/> WT f vs DKO m: P=1<br/> DKO f vs WT m: P=1<br/> WT f vs WT m: P=0.423<br/> DKO m vs WT m: P=0.475</p> <p><u>Trial 2:</u><br/> WT f vs DKO f: P=1<br/> DKO f vs WT m: P=0.167<br/> WT f vs DKO m: P=1<br/> DKO f vs WT m: P=1<br/> WT f vs WT m: P=1<br/> DKO m vs WT m: P=0.786</p> <p><u>Trial 3:</u><br/> WT f vs DKO f: P=1<br/> DKO f vs WT m: P=0.298<br/> WT f vs DKO m: P=0.16<br/> DKO f vs WT m: P=1<br/> WT f vs WT m: P=1<br/> DKO m vs WT m: P=1</p> <p><u>Trial 4:</u><br/> WT f vs DKO f: P=0.95<br/> DKO f vs WT m: P=0.648<br/> WT f vs DKO m: P=0.027<br/> DKO f vs WT m: P=1<br/> WT f vs WT m: P=0.388<br/> DKO m vs WT m: P=1</p> <p><u>Trial 5:</u><br/> WT f vs DKO f: P=1<br/> DKO f vs WT m: P=1<br/> WT f vs DKO m: P=0.508<br/> DKO f vs WT m: P=1<br/> WT f vs WT m: P=0.579<br/> DKO m vs WT m: P=1</p> |
| Object recognition index | <p>females:<br/> wild-type=8<br/> MNK1/2<sup>DKO</sup> =8</p> <p>males:<br/> wild-type=5<br/> MNK1/2<sup>DKO</sup> =8</p> | Two-way ANOVA                     | <p>Interaction: <math>F_{(1, 25)} = 0.7184</math>,<br/> P=0.4047<br/> Sex: <math>F_{(1, 25)} = 0.08981</math>, P=0.7669<br/> Genotype: <math>F_{(1, 25)} = 0.04815</math>,<br/> P=0.8281</p>                                                                                                                                                                                                                                                                                                                                                                                                                                                                                                                                                                                                                                                                                                                        |
| NOR                      | <p>MNK1/2<sup>DKO</sup> male=8<br/> MNK1/2<sup>DKO</sup> female=8</p>                                                     | Three-way Repeated Measures ANOVA | <p>Genotype: <math>F_{(1, 25)} = 0.08</math>, P=0.78<br/> Sex: <math>F_{(1, 25)} = 1.82</math>, P=0.19<br/> Novelty: <math>F_{(1, 25)} = 27.51</math>, P&lt;0.0001<br/> genotype x sex: <math>F_{(1, 25)} = 0.06</math>,<br/> P=0.802<br/> genotype x novelty: <math>F_{(1, 25)} = 0.6</math>,<br/> P=0.446<br/> Sex x novelty: <math>F_{(1, 25)} = 4.79</math>,<br/> P=0.038<br/> Sex x novelty x genotype: <math>F_{(1, 25)} = 0.14</math>, P=0.712</p>                                                                                                                                                                                                                                                                                                                                                                                                                                                           |

|                   |                                                                                                              |                                                                        |                                                                                                                                                                                                                                                                                                        |
|-------------------|--------------------------------------------------------------------------------------------------------------|------------------------------------------------------------------------|--------------------------------------------------------------------------------------------------------------------------------------------------------------------------------------------------------------------------------------------------------------------------------------------------------|
|                   |                                                                                                              |                                                                        | <u>Post-hoc: Novelty x sex</u><br>Familiar vs novel females :<br>$P < 0.0001$<br>Familiar vs novel males:<br>$P = 0.072$                                                                                                                                                                               |
| NOR RI            | females:<br>wild-type=8<br>MNK1/2 <sup>DKO</sup> =8<br><br>males:<br>wild-type=5<br>MNK1/2 <sup>DKO</sup> =8 | Two-way ANOVA                                                          | Interaction: $F_{(1, 25)} = 0.06243$ ,<br>$P = 0.8047$<br>Sex: $F_{(1, 25)} = 02.876$ , $P = 0.1188$<br>Genotype: $F_{(1, 25)} = 0.4284$ ,<br>$P = 0.1023$                                                                                                                                             |
| Open field        | females:<br>wild-type=8<br>MNK1/2 <sup>DKO</sup> =8<br><br>males:<br>wild-type=5<br>MNK1/2 <sup>DKO</sup> =8 | Two-way ANOVA,<br>Tukey's post-hoc test<br>for multiple<br>comparisons | Interaction: $F_{(1, 25)} = 0.1033$ ,<br>$P = 0.7505$<br>Sex: $F_{(1, 25)} = 0.9874$ , $P = 0.3299$<br>Genotype: $F_{(1, 25)} = 15.19$ ,<br>$P = 0.0005$<br><br>Wild-type females vs MNK1/2 <sup>DKO</sup><br>females: $P = 0.0155$<br>Wild-type males vs MNK1/2 <sup>DKO</sup><br>males: $P = 0.0043$ |
| Time in<br>center | females:<br>wild-type=8<br>MNK1/2 <sup>DKO</sup> =8<br><br>males:<br>wild-type=5<br>MNK1/2 <sup>DKO</sup> =8 | Two-way ANOVA                                                          | Interaction: $F_{(1, 25)} = 0.8855$ ,<br>$P = 0.3557$<br>Sex: $F_{(1, 25)} = 0.1842$ , $P = 0.6715$<br>Genotype: $F_{(1, 25)} = 0.2072$ ,<br>$P = 0.6529$                                                                                                                                              |
