# Supplementary material for: Distinct roles for MNK1 and MNK2 in social and cognitive behavior through kinase-specific regulation of the synaptic proteome and phosphoproteome
Source: Springer Nature journal article supplement (doi:10.1038/s41380-026-03483-w), 2026-02-13
Supplement: MOESM8 [file 41380_2026_3483_MOESM8_ESM.pdf › 41380_2026_3483_MOESM8_ESM.pdf]

| Figure | Sample Size                                                                                                                             | Statistical test                                                    | Values                                                                                                                                                                                                                                                                                                                                                                                                                                                                                                                                                                                                                                                                                                                                                                                                                                                                                                                                                                           |
|--------|-----------------------------------------------------------------------------------------------------------------------------------------|---------------------------------------------------------------------|----------------------------------------------------------------------------------------------------------------------------------------------------------------------------------------------------------------------------------------------------------------------------------------------------------------------------------------------------------------------------------------------------------------------------------------------------------------------------------------------------------------------------------------------------------------------------------------------------------------------------------------------------------------------------------------------------------------------------------------------------------------------------------------------------------------------------------------------------------------------------------------------------------------------------------------------------------------------------------|
| 1B     | <p>wild-type=17<br/>MNK1<sup>KO</sup>=14<br/>MNK2<sup>KO</sup>=17</p> <p><i>Trial 5 is missing from one MNK2<sup>KO</sup> mouse</i></p> | Mixed-effects model, Tukey's post-hoc test for multiple comparisons | <p>trial: <math>F_{(3.512, 157.2)} = 8.760</math>, <math>P &lt; 0.0001</math><br/> genotype: <math>F_{(2, 45)} = 4.735</math>, <math>P = 0.0136</math><br/> trial <math>\times</math> genotype interaction: <math>F_{(8, 179)} = 0.8201</math>, <math>P = 0.5858</math></p> <p>wild-type vs MNK1<sup>KO</sup><br/> Trial1: <math>P = 0.1996</math><br/> Trial2: <math>P = 0.4601</math><br/> Trial3: <math>P = 0.8604</math><br/> Trial4: <math>P = 0.1793</math><br/> Trial5: <math>P = 0.2983</math></p> <p>wild-type vs MNK2<sup>KO</sup><br/> Trial1: <math>P = 0.0500</math><br/> Trial2: <math>P = 0.1476</math><br/> Trial3: <math>P = 0.2713</math><br/> Trial4: <math>P = 0.0609</math><br/> Trial5: <math>P = 0.2653</math></p> <p>MNK1<sup>KO</sup> vs MNK2<sup>KO</sup><br/> Trial1: <math>P = 0.9361</math><br/> Trial2: <math>P = 0.7916</math><br/> Trial3: <math>P = 0.0967</math><br/> Trial4: <math>P = 0.9844</math><br/> Trial5: <math>P = 0.9880</math></p> |
| 1C     | <p>wild-type=17<br/>MNK1<sup>KO</sup>=14<br/>MNK2<sup>KO</sup>=17</p> <p><i>Trial 5 is missing from one MNK2<sup>KO</sup> mouse</i></p> | Mixed-effects model, Tukey's post-hoc test for multiple comparisons | <p>trial: <math>F_{(3.318, 148.5)} = 0.5512</math>, <math>P = 0.6658</math><br/> genotype: <math>F_{(2, 45)} = 6.569</math>, <math>P = 0.0031</math><br/> trial <math>\times</math> genotype interaction: <math>F_{(8, 179)} = 0.9465</math>, <math>P = 0.4797</math></p> <p>wild-type vs MNK1<sup>KO</sup><br/> Trial1: <math>P = 0.0226</math><br/> Trial2: <math>P = 0.0063</math><br/> Trial3: <math>P = 0.5086</math><br/> Trial4: <math>P = 0.7346</math><br/> Trial5: <math>P = 0.066</math></p> <p>wild-type vs MNK2<sup>KO</sup><br/> Trial1: <math>P = 0.2453</math><br/> Trial2: <math>P = 0.1319</math><br/> Trial3: <math>P = 0.2567</math><br/> Trial4: <math>P = 0.1472</math><br/> Trial5: <math>P = 0.598</math></p> <p>MNK1<sup>KO</sup> vs MNK2<sup>KO</sup><br/> Trial1: <math>P = 0.6477</math><br/> Trial2: <math>P = 0.3311</math><br/> Trial3: <math>P = 0.8572</math><br/> Trial4: <math>P = 0.5895</math></p>                                          |

|    |                                                                                                                                         |                                                                        |                                                                                                                                                                                                                                                                                                                                                                                                                                                                                                                                                                                                                                                |
|----|-----------------------------------------------------------------------------------------------------------------------------------------|------------------------------------------------------------------------|------------------------------------------------------------------------------------------------------------------------------------------------------------------------------------------------------------------------------------------------------------------------------------------------------------------------------------------------------------------------------------------------------------------------------------------------------------------------------------------------------------------------------------------------------------------------------------------------------------------------------------------------|
|    |                                                                                                                                         |                                                                        | Trial5: P=0.4593                                                                                                                                                                                                                                                                                                                                                                                                                                                                                                                                                                                                                               |
| 1D | <p>wild-type=17<br/>MNK1<sup>KO</sup>=14<br/>MNK2<sup>KO</sup>=17</p> <p><i>Trial 5 is missing from one MNK2<sup>KO</sup> mouse</i></p> | Mixed-effects model,<br>Tukey's post-hoc test for multiple comparisons | <p>trial: F<sub>(2.703, 121.0)</sub> = 3.131, P=0.0328<br/>genotype: F<sub>(2, 45)</sub> = 13.24, P&lt;0.0001<br/>trial × genotype interaction: F<sub>(8, 179)</sub> = 1.357, P=0.2183</p> <p>wild-type vs MNK1<sup>KO</sup><br/>Trial1: P=0.357<br/>Trial2: P=0.0155<br/>Trial3: P=0.2736<br/>Trial4: P=0.0188<br/>Trial5: P=0.0886</p> <p>wild-type vs MNK2<sup>KO</sup><br/>Trial1: P=0.0004<br/>Trial2: P=0.0001<br/>Trial3: P=0.0351<br/>Trial4: P=0.3417<br/>Trial5: P=0.0667</p> <p>MNK1<sup>KO</sup> vs MNK2<sup>KO</sup><br/>Trial1: P=0.2773<br/>Trial2: P=0.6374<br/>Trial3: P=0.4472<br/>Trial4: P=0.2077<br/>Trial5: P=0.9735</p> |
| 1E | <p>wild-type=17<br/>MNK1<sup>KO</sup>=15<br/>MNK2<sup>KO</sup>=17</p>                                                                   | RM two-way ANOVA                                                       | <p>trials: F<sub>(3.882, 178.6)</sub> = 41.79, P&lt;0.0001<br/>genotype: F<sub>(2, 46)</sub> = 1.825, P=0.1727<br/>trials × genotype: F<sub>(22, 506)</sub> = 1.265, P=0.1887</p>                                                                                                                                                                                                                                                                                                                                                                                                                                                              |
| 1F | <p>wild-type=17<br/>MNK1<sup>KO</sup>=15<br/>MNK2<sup>KO</sup>=17</p>                                                                   | RM two-way ANOVA,<br>Tukey's post-hoc test for multiple comparisons    | <p>trial: F<sub>(2.514, 115.6)</sub> = 37.21, P&lt;0.0001<br/>genotype: F<sub>(2, 46)</sub> = 10.58, P=0.0002<br/>trial × genotype: F<sub>(8, 184)</sub> = 6.180, P&lt;0.0001</p> <p>wild-type vs MNK1<sup>KO</sup><br/>Trial1: P=0.0037<br/>Trial2: P=0.0155<br/>Trial3: P=0.1663<br/>Trial4: P=0.0127<br/>Trial5: P=0.0005</p> <p>wild-type vs MNK2<sup>KO</sup><br/>Trial1: P=0.8023<br/>Trial2: P=0.8813<br/>Trial3: P=0.7782</p>                                                                                                                                                                                                          |

|    |                                                                                                                                                     |                                                                     |                                                                                                                                                                                                                                                                                                                                                                                                                                                                                                                                                   |
|----|-----------------------------------------------------------------------------------------------------------------------------------------------------|---------------------------------------------------------------------|---------------------------------------------------------------------------------------------------------------------------------------------------------------------------------------------------------------------------------------------------------------------------------------------------------------------------------------------------------------------------------------------------------------------------------------------------------------------------------------------------------------------------------------------------|
|    |                                                                                                                                                     |                                                                     | <p>Trial4: P=0.9338<br/>Trial5: P=0.2891</p> <p>MNK1<sup>KO</sup> vs MNK2<sup>KO</sup><br/>Trial1: P=0.0066<br/>Trial2: P=0.0309<br/>Trial3: P=0.3216<br/>Trial4: P=0.0086<br/>Trial5: P&lt;0.0001</p>                                                                                                                                                                                                                                                                                                                                            |
| 1G | wild-type=17<br>MNK1 <sup>KO</sup> =15<br>MNK2 <sup>KO</sup> =17                                                                                    | Kruskal-Wallis test, Dunn's post-hoc test for multiple comparisons  | <p>K<sub>(3)</sub>=19.25, P&lt;0.0001</p> <p>wild-type vs MNK1<sup>KO</sup>: P=0.0073<br/>wild-type vs MNK2<sup>KO</sup>: P=0.5720<br/>MNK1<sup>KO</sup> vs MNK2<sup>KO</sup>: P&lt;0.0001</p>                                                                                                                                                                                                                                                                                                                                                    |
| 1H | wild-type=17<br>MNK1 <sup>KO</sup> =15<br>MNK2 <sup>KO</sup> =17                                                                                    | RM two-way ANOVA, Tukey's post-hoc test for multiple comparisons    | <p>object: F<sub>(1, 46)</sub> = 20.08, P&lt;0.0001<br/>genotype: F<sub>(2, 46)</sub> = 13.48, P&lt;0.0001<br/>object × genotype: F<sub>(2, 46)</sub> = 4.183, P=0.0214</p> <p>familiar vs novel<br/>wild-type: P=0.0006<br/>MNK1<sup>KO</sup>: P=0.9973<br/>MNK2<sup>KO</sup>: P=0.0017</p>                                                                                                                                                                                                                                                      |
| 1I | wild-type=17<br>MNK1 <sup>KO</sup> =15<br>MNK2 <sup>KO</sup> =17                                                                                    | One-way ANOVA, Tukey's post-hoc test for multiple comparisons       | <p>F<sub>(2, 46)</sub> = 4.843, P=0.0123</p> <p>wild-type vs MNK1<sup>KO</sup>: P= 0.0407<br/>wild-type vs MNK2<sup>KO</sup>: P= 0.9177<br/>MNK1<sup>KO</sup> vs MNK2<sup>KO</sup>: P= 0.0158</p>                                                                                                                                                                                                                                                                                                                                                 |
| 1J | <p>wild-type=16<br/>MNK1<sup>KO</sup>=15<br/>MNK2<sup>KO</sup>=17</p> <p><i>Last three minutes are missing from one MNK1<sup>KO</sup> mouse</i></p> | Mixed-effects model, Tukey's post-hoc test for multiple comparisons | <p>time: F<sub>(4.129, 183.0)</sub> = 20.74, P&lt;0.0001<br/>genotype: F<sub>(2, 45)</sub> = 3.984, P=0.0255<br/>time × genotype: F<sub>(18, 399)</sub> = 3.815, P&lt;0.0001</p> <p>wild-type vs MNK1<sup>KO</sup><br/>Minute 1: P=0.0640<br/>Minute 2: P=0.0006<br/>Minute 3: P=0.0652<br/>Minute 4: P=0.1525<br/>Minute 5: P=0.0203<br/>Minute 6: P=0.3122<br/>Minute 7: P=0.7071<br/>Minute 8: P=0.8076<br/>Minute 9: P=0.6218<br/>Minute 10: P=0.2908</p> <p>wild-type vs MNK2<sup>KO</sup><br/>Minute 1: P=0.1390<br/>Minute 2: P=0.4599</p> |

|    |                                                                                                                                                       |                     |                                                                                                                                                                                                                                                                                                                                                                                                                                                                                                   |
|----|-------------------------------------------------------------------------------------------------------------------------------------------------------|---------------------|---------------------------------------------------------------------------------------------------------------------------------------------------------------------------------------------------------------------------------------------------------------------------------------------------------------------------------------------------------------------------------------------------------------------------------------------------------------------------------------------------|
|    |                                                                                                                                                       |                     | <p>Minute 3: P=0.2032<br/> Minute 4: P=0.4710<br/> Minute 5: P=0.0012<br/> Minute 6: P=0.1773<br/> Minute 7: P=0.9988<br/> Minute 8: P=0.8445<br/> Minute 9: P=0.6583<br/> Minute 10: P=0.2778</p> <p>MNK1<sup>KO</sup> vs MNK2<sup>KO</sup><br/> Minute 1: P=0.0003<br/> Minute 2: P=0.0266<br/> Minute 3: P=0.6507<br/> Minute 4: P=0.5080<br/> Minute 5: P=0.6591<br/> Minute 6: P=0.8818<br/> Minute 7: P=0.6743<br/> Minute 8: P=0.3860<br/> Minute 9: P=0.9824<br/> Minute 10: P=0.9967</p> |
| 1K | <p>wild-type=16<br/> MNK1<sup>KO</sup>=15<br/> MNK2<sup>KO</sup>=17</p> <p><i>Last three minutes are missing from one MNK1<sup>KO</sup> mouse</i></p> | Mixed-effects model | <p>time: F<sub>(5,368, 238.0)</sub> = 2.066, P=0.0655<br/> genotype: F<sub>(2, 45)</sub> = 0.08049, P=0.9228<br/> time × genotype interaction: F<sub>(18, 399)</sub> = 1.324, P=0.1684</p>                                                                                                                                                                                                                                                                                                        |
| 3B | <p>Mean log<sub>2</sub> value relative to wild-type from 4 mice per genotype.<br/> Number of pairs: 9114 proteins / genotype</p>                      | Pearson r           | <p>MNK1<sup>KO</sup> logFC vs MNK2<sup>KO</sup><br/> logFC: r = 0.5574 (95% confidence interval 0.5430 – 0.5713), P&lt;0.0001</p> <p>MNK1<sup>KO</sup> logFC vs MNK1/2<sup>DKO</sup><br/> logFC: r = 0.5186 (95% confidence interval 0.5034 – 0.5334), P&lt;0.0001</p> <p>MNK2<sup>KO</sup> logFC vs MNK1/2<sup>DKO</sup><br/> logFC: r = 0.4770 (95% confidence interval 0.4610 – 0.4927), P&lt;0.0001</p>                                                                                       |
| 4A | <p>Mean log<sub>2</sub> value relative to wild-type from 4 mice per genotype.<br/> Number of pairs: 9114 proteins / genotype</p>                      | Pearson r           | <p>MNK1<sup>KO</sup> logFC vs MNK2<sup>KO</sup><br/> logFC: r = 0.05323 (95% confidence interval 0.03273 – 0.07368), P&lt;0.0001</p> <p>MNK1<sup>KO</sup> logFC vs MNK1/2<sup>DKO</sup><br/> logFC: r = 0.2309 (95% confidence interval 0.2114 – 0.2502), P&lt;0.0001</p> <p>MNK2<sup>KO</sup> logFC vs MNK1/2<sup>DKO</sup><br/> logFC: r = 0.6062 (95%</p>                                                                                                                                      |

|    |                                                                                                                                    |                                                                    |                                                                                                                                                                                                                                                                                                                                                                                                                      |
|----|------------------------------------------------------------------------------------------------------------------------------------|--------------------------------------------------------------------|----------------------------------------------------------------------------------------------------------------------------------------------------------------------------------------------------------------------------------------------------------------------------------------------------------------------------------------------------------------------------------------------------------------------|
|    |                                                                                                                                    |                                                                    | confidence interval 0.5930 – 0.6190), $P < 0.0001$                                                                                                                                                                                                                                                                                                                                                                   |
| 4E | Mean log <sub>2</sub> value relative to wild-type from 4 mice per genotype.<br>Ribosomes: 73<br>All: 73 randomly selected proteins | Kolmogorov-Smirnov test                                            | <p>MNK1<sup>KO</sup> CX: D= 0.3699, <math>P &lt; 0.0001</math></p> <p>MNK2<sup>KO</sup> CX: D= 0.3288, <math>P = 0.0007</math></p> <p>MNK1/2<sup>DKO</sup> CX: D= 0.4110, <math>P &lt; 0.0001</math></p> <p>MNK1<sup>KO</sup> SYP: D= 0.6849, <math>P &lt; 0.0001</math></p> <p>MNK2<sup>KO</sup> SYP: D= 0.3288, <math>P = 0.0007</math></p> <p>MNK1/2<sup>DKO</sup> SYP: D= 0.6164, <math>P &lt; 0.0001</math></p> |
| 6B | wild-type=18<br>MNK1 <sup>KO</sup> =12<br>MNK2 <sup>KO</sup> =12                                                                   | Kruskal-Wallis test, Dunn's post-hoc test for multiple comparisons | <p><math>K_{(3)} = 10.77</math>, <math>P = 0.0046</math></p> <p>wild-type vs MNK1<sup>KO</sup>: <math>P = 0.0142</math><br/> wild-type vs MNK2<sup>KO</sup>: <math>P = 0.0234</math><br/> MNK1<sup>KO</sup> vs MNK2<sup>KO</sup>: <math>P &gt; 0.9999</math></p>                                                                                                                                                     |
| 6D | wild-type=21<br>MNK1 <sup>KO</sup> =15<br>MNK2 <sup>KO</sup> =16                                                                   | Kruskal-Wallis test                                                | $K_{(3)} = 2.754$ , $P = 0.2523$                                                                                                                                                                                                                                                                                                                                                                                     |
| 6F | wild-type=5<br>MNK1 <sup>KO</sup> =5<br>MNK2 <sup>KO</sup> =5<br>MNK1/2 <sup>DKO</sup> =4                                          | Two-way ANOVA                                                      | <p>Subcellular region: <math>F_{(1, 30)} = 210.9</math>, <math>P &lt; 0.0001</math><br/> genotype: <math>F_{(3, 30)} = 0.4374</math>, <math>P = 0.7279</math><br/> Subcellular region <math>\times</math> genotype: <math>F_{(3, 30)} = 0.3395</math>, <math>P = 0.7969</math></p>                                                                                                                                   |
| 6H | wild-type=165 synapses (2 mice)<br>MNK1 <sup>KO</sup> =178 synapses (3 mice)<br>MNK2 <sup>KO</sup> =157 synapses (3 mice)          | Kruskal-Wallis test, Dunn's post-hoc test for multiple comparisons | <p><math>K_{(3)} = 8.594</math>, <math>P = 0.0136</math></p> <p>wild-type vs MNK1<sup>KO</sup>: <math>P = 0.0699</math><br/> wild-type vs MNK2<sup>KO</sup>: <math>P = 0.0181</math><br/> MNK1<sup>KO</sup> vs MNK2<sup>KO</sup>: <math>P &gt; 0.9999</math></p>                                                                                                                                                     |
| 6I | wild-type=165 synapses (2 mice)<br>MNK1 <sup>KO</sup> =178 synapses (3 mice)                                                       | Kruskal-Wallis test, Dunn's post-hoc test for multiple comparisons | <p><math>K_{(3)} = 46.83</math>, <math>P &lt; 0.0001</math></p> <p>wild-type vs MNK1<sup>KO</sup>: <math>P = 0.0202</math><br/> wild-type vs MNK2<sup>KO</sup>: <math>P &lt; 0.0001</math><br/> MNK1<sup>KO</sup> vs MNK2<sup>KO</sup>: <math>P &lt; 0.0001</math></p>                                                                                                                                               |

|                                  |                                                                                                                                                  |                                                                                                                                                                                    |                                                                                                                                                                                                                                                                                                                                |
|----------------------------------|--------------------------------------------------------------------------------------------------------------------------------------------------|------------------------------------------------------------------------------------------------------------------------------------------------------------------------------------|--------------------------------------------------------------------------------------------------------------------------------------------------------------------------------------------------------------------------------------------------------------------------------------------------------------------------------|
|                                  | MNK2 <sup>KO</sup> =157<br>synapses (3<br>mice)                                                                                                  |                                                                                                                                                                                    |                                                                                                                                                                                                                                                                                                                                |
| 6K                               | wild-type=14<br>MNK1 <sup>KO</sup> =14<br>MNK2 <sup>KO</sup> =16                                                                                 | One-way ANOVA, Tukey's<br>post-hoc test for multiple<br>comparisons                                                                                                                | $F_{(2, 41)} = 17.27$ , $P < 0.0001$<br><br>wild-type vs MNK1 <sup>KO</sup> : $P = 0.0026$<br>wild-type vs MNK2 <sup>KO</sup> : $P < 0.0001$<br>MNK1 <sup>KO</sup> vs MNK2 <sup>KO</sup> : $P = 0.0932$                                                                                                                        |
| 6L                               | wild-type=14<br>MNK1 <sup>KO</sup> =15<br>MNK2 <sup>KO</sup> =15                                                                                 | Kruskal-Wallis test, Dunn's<br>post-hoc test for multiple<br>comparisons                                                                                                           | $K_{(3)} = 22.14$ , $P < 0.0001$<br><br>wild-type vs MNK1 <sup>KO</sup> : $P < 0.0001$<br>wild-type vs MNK2 <sup>KO</sup> : $P = 0.0166$<br>MNK1 <sup>KO</sup> vs MNK2 <sup>KO</sup> : $P = 0.1545$                                                                                                                            |
| 6M                               | Mean log <sub>2</sub> value<br>relative to wild-<br>type from 4 mice<br>per genotype.<br>Number of pairs:<br>10230<br>phosphosites /<br>genotype | Pearson r                                                                                                                                                                          | <i>cortex</i> :<br>MNK1 <sup>KO</sup> logFC vs MNK2 <sup>KO</sup><br>logFC: $r = 0.4523$ (95%<br>confidence interval 0.4368 –<br>0.4676), $P < 0.0001$<br><br><i>synaptoneurosome</i> :<br>MNK1 <sup>KO</sup> logFC vs MNK2 <sup>KO</sup><br>logFC: $r = 0.2254$ (95%<br>confidence interval 0.2069 –<br>0.2437), $P < 0.0001$ |
| <b>Supplementary<br/>Figures</b> | <b>Sample Size</b>                                                                                                                               | <b>Statistical test</b>                                                                                                                                                            | <b>Values</b>                                                                                                                                                                                                                                                                                                                  |
| S1B                              | wild-type=17<br>MNK1 <sup>KO</sup> =14<br>MNK2 <sup>KO</sup> =17                                                                                 | RM two-way ANOVA                                                                                                                                                                   | trial: $F_{(4, 180)} = 85.86$ , $P < 0.0001$<br>genotype: $F_{(2, 45)} = 0.7987$ ,<br>$P = 0.4562$<br>trial $\times$ genotype: $F_{(8, 180)} = 1.933$ ,<br>$P = 0.0577$                                                                                                                                                        |
| S1C                              | wild-type=17<br>MNK1 <sup>KO</sup> =14<br>MNK2 <sup>KO</sup> =17                                                                                 | One-way ANOVA,<br>Tukey's post-hoc test for<br>multiple comparisons                                                                                                                | $F_{(2, 45)} = 6.565$ , $P = 0.0031$<br>wild-type vs MNK1 <sup>KO</sup> : $P = 0.0038$<br>wild-type vs MNK2 <sup>KO</sup> : $P = 0.8385$<br>MNK1 <sup>KO</sup> vs MNK2 <sup>KO</sup> : $P = 0.0164$                                                                                                                            |
| S1D                              | wild-type=17<br>MNK1 <sup>KO</sup> =14<br>MNK2 <sup>KO</sup> =17<br><br><i>Trial 5 is missing<br/>from one MNK2<sup>KO</sup><br/>mouse</i>       | <i>Nose to tail</i><br>Mixed-effects model<br><br><br><br><br><br><br><br><br><br><i>Nose to body</i><br>Mixed-effects model,<br>Tukey's post-hoc test for<br>multiple comparisons | <i>Nose to tail</i><br>trial: $F_{(2.676, 119.8)} = 30.94$ ,<br>$P < 0.0001$<br>genotype: $F_{(2, 45)} = 2.411$ ,<br>$P = 0.1012$<br>trial $\times$ genotype: $F_{(8, 179)} =$<br>$0.1849$ , $P = 0.9927$<br><br><br><br><br><br><br><br><br><br><i>Nose to body</i><br>trial: $F_{(3.757, 168.1)} = 4.985$ ,<br>$P = 0.0010$  |

|     |                                                                                                                                                     |                                                                                                               |                                                                                                                                                                                                                                                                                                                                                                                                                                                                                                                                                                                                                                                                                                                                                                                                                                                                                                                                                                                                                                                                                                                                                                                                                               |
|-----|-----------------------------------------------------------------------------------------------------------------------------------------------------|---------------------------------------------------------------------------------------------------------------|-------------------------------------------------------------------------------------------------------------------------------------------------------------------------------------------------------------------------------------------------------------------------------------------------------------------------------------------------------------------------------------------------------------------------------------------------------------------------------------------------------------------------------------------------------------------------------------------------------------------------------------------------------------------------------------------------------------------------------------------------------------------------------------------------------------------------------------------------------------------------------------------------------------------------------------------------------------------------------------------------------------------------------------------------------------------------------------------------------------------------------------------------------------------------------------------------------------------------------|
|     |                                                                                                                                                     |                                                                                                               | <p>genotype: <math>F_{(2, 45)} = 4.599</math>,<br/> <math>P=0.0152</math><br/> trial <math>\times</math> genotype: <math>F_{(8, 179)} = 0.8569</math>,<br/> <math>P=0.5541</math></p> <p>wild-type vs MNK1<sup>KO</sup><br/> Trial1: <math>P= 0.0520</math><br/> Trial2: <math>P= 0.4134</math><br/> Trial3: <math>P= 0.9037</math><br/> Trial4: <math>P= 0.6319</math><br/> Trial5: <math>P= 0.3153</math></p> <p>wild-type vs MNK2<sup>KO</sup><br/> Trial1: <math>P= 0.0155</math><br/> Trial2: <math>P= 0.0752</math><br/> Trial3: <math>P= 0.4734</math><br/> Trial4: <math>P= 0.1237</math><br/> Trial5: <math>P= 0.0995</math></p> <p>MNK1<sup>KO</sup> vs MNK2<sup>KO</sup><br/> Trial1: <math>P= 0.9999</math><br/> Trial2: <math>P= 0.6942</math><br/> Trial3: <math>P= 0.3563</math><br/> Trial4: <math>P= 0.5535</math><br/> Trial5: <math>P= 0.9831</math></p> <p><i>Nose to nose</i><br/> Mixed-effects model</p> <p><i>Nose to nose</i><br/> trial: <math>F_{(2.235, 100.0)} = 5.231</math>,<br/> <math>P=0.0052</math><br/> genotype: <math>F_{(2, 45)} = 1.827</math>,<br/> <math>P=0.1726</math><br/> trial <math>\times</math> genotype: <math>F_{(8, 179)} = 1.186</math>,<br/> <math>P=0.3099</math></p> |
| S1E | <p>wild-type=17<br/> MNK1<sup>KO</sup>=14<br/> MNK2<sup>KO</sup>=17</p> <p><i>Trial 5 is missing<br/> from one MNK2<sup>KO</sup><br/> mouse</i></p> | <p><i>Side by side</i><br/> Mixed-effects model,<br/> Tukey's post-hoc test for<br/> multiple comparisons</p> | <p><i>Side by side</i><br/> trial: <math>F_{(2.492, 111.5)} = 3.214</math>,<br/> <math>P=0.0336</math><br/> genotype: <math>F_{(2, 45)} = 3.387</math>,<br/> <math>P=0.0426</math><br/> trial <math>\times</math> genotype: <math>F_{(8, 179)} = 0.7083</math>, <math>P=0.6840</math></p> <p>wild-type vs MNK1<sup>KO</sup><br/> Trial1: <math>P= 0.0714</math><br/> Trial2: <math>P= 0.0610</math><br/> Trial3: <math>P= 0.9046</math><br/> Trial4: <math>P= 0.7391</math><br/> Trial5: <math>P= 0.1718</math></p> <p>wild-type vs MNK2<sup>KO</sup><br/> Trial1: <math>P= 0.2334</math><br/> Trial2: <math>P= 0.4526</math></p>                                                                                                                                                                                                                                                                                                                                                                                                                                                                                                                                                                                             |

|     |                                                                                                                                                 |                                                                                                             |                                                                                                                                                                                                                                                                                                                                                                                                                                                                                                                                                                                                                                                                                                                                                                                                                                                                                                                        |
|-----|-------------------------------------------------------------------------------------------------------------------------------------------------|-------------------------------------------------------------------------------------------------------------|------------------------------------------------------------------------------------------------------------------------------------------------------------------------------------------------------------------------------------------------------------------------------------------------------------------------------------------------------------------------------------------------------------------------------------------------------------------------------------------------------------------------------------------------------------------------------------------------------------------------------------------------------------------------------------------------------------------------------------------------------------------------------------------------------------------------------------------------------------------------------------------------------------------------|
|     |                                                                                                                                                 | <p>Side by side reverse<br/>Mixed-effects model,<br/>Tukey's post-hoc test for<br/>multiple comparisons</p> | <p>Trial3: P= 0.5697<br/>Trial4: P= 0.3383<br/>Trial5: P= 0.9498</p> <p>MNK1<sup>KO</sup> vs MNK2<sup>KO</sup><br/>Trial1: P= 0.7469<br/>Trial2: P= 0.6209<br/>Trial3: P= 0.7352<br/>Trial4: P= 0.7417<br/>Trial5: P= 0.2276</p> <p>Side by side reverse<br/>trial: F<sub>(3.672, 164.3)</sub> = 1.060,<br/>P=0.3753<br/>genotype: F<sub>(2, 45)</sub> = 5.983,<br/>P=0.0050<br/>trial × genotype: F<sub>(8, 179)</sub> =<br/>0.5915, P=0.7841</p> <p>wild-type vs MNK1<sup>KO</sup><br/>Trial1: P= 0.2486<br/>Trial2: P= 0.0274<br/>Trial3: P= 0.3846<br/>Trial4: P= 0.9537<br/>Trial5: P= 0.1072</p> <p>wild-type vs MNK2<sup>KO</sup><br/>Trial1: P= 0.3977<br/>Trial2: P= 0.1633<br/>Trial3: P= 0.2106<br/>Trial4: P= 0.4885<br/>Trial5: P= 0.4039</p> <p>MNK1<sup>KO</sup> vs MNK2<sup>KO</sup><br/>Trial1: P= 0.8071<br/>Trial2: P= 0.3965<br/>Trial3: P= 0.9997<br/>Trial4: P= 0.7163<br/>Trial5: P= 0.8183</p> |
| S1F | <p>wild-type=17<br/>MNK1<sup>KO</sup>=14<br/>MNK2<sup>KO</sup>=17</p> <p><i>Trial 5 is missing<br/>from one MNK2<sup>KO</sup><br/>mouse</i></p> | <p>Sniffing test<br/>Mixed-effects model,<br/>Tukey's post-hoc test for<br/>multiple comparisons</p>        | <p>Sniffing test<br/>trial: F<sub>(2.962, 132.5)</sub> = 3.233,<br/>P=0.0250<br/>genotype: F<sub>(2, 45)</sub> = 12.11,<br/>P&lt;0.0001<br/>trial × genotype: F<sub>(8, 179)</sub> = 1.633,<br/>P= 0.1182</p> <p>wild-type vs MNK1<sup>KO</sup><br/>Trial1: P= 0.5450<br/>Trial2: P= 0.0354<br/>Trial3: P= 0.3064<br/>Trial4: P= 0.0154<br/>Trial5: P= 0.2479</p>                                                                                                                                                                                                                                                                                                                                                                                                                                                                                                                                                      |



|  |  |                                                                                                             |                                                                                                                                                                                                                                                                                                                                                                                                                                                                                                                                                                                                                                                                                                                                                                                                                                                                                                                                                                                                                                                                                                                                                      |
|--|--|-------------------------------------------------------------------------------------------------------------|------------------------------------------------------------------------------------------------------------------------------------------------------------------------------------------------------------------------------------------------------------------------------------------------------------------------------------------------------------------------------------------------------------------------------------------------------------------------------------------------------------------------------------------------------------------------------------------------------------------------------------------------------------------------------------------------------------------------------------------------------------------------------------------------------------------------------------------------------------------------------------------------------------------------------------------------------------------------------------------------------------------------------------------------------------------------------------------------------------------------------------------------------|
|  |  |                                                                                                             | <p>wild-type vs MNK2<sup>KO</sup><br/> Trial1: P= 0.0001<br/> Trial2: P= 0.0008<br/> Trial3: P= 0.0182<br/> Trial4: P= 0.2998<br/> Trial5: P= 0.0304</p> <p>MNK1<sup>KO</sup> vs MNK2<sup>KO</sup><br/> Trial1: P= 0.0472<br/> Trial2: P= 0.3948<br/> Trial3: P= 0.3763<br/> Trial4: P= 0.1547<br/> Trial5: P= 0.8933</p> <p><i>Climbing test</i><br/> Mixed-effects model,<br/> Tukey's post-hoc test for<br/> multiple comparisons</p> <p><i>Climbing test</i><br/> trial: F<sub>(3.078, 137.8)</sub> = 1.141,<br/> P=0.3355<br/> genotype: F<sub>(2, 45)</sub> = 5.391,<br/> P=0.0080<br/> trial × genotype: F<sub>(8, 179)</sub> =<br/> 0.5523, P= 0.8157</p> <p>wild-type vs MNK1<sup>KO</sup><br/> Trial1: P= 0.3453<br/> Trial2: P= 0.1734<br/> Trial3: P= 0.4833<br/> Trial4: P= 0.2026<br/> Trial5: P= 0.0955</p> <p>wild-type vs MNK2<sup>KO</sup><br/> Trial1: P= 0.0298<br/> Trial2: P= 0.0693<br/> Trial3: P= 0.2653<br/> Trial4: P= 0.6798<br/> Trial5: P= 0.7745</p> <p>MNK1<sup>KO</sup> vs MNK2<sup>KO</sup><br/> Trial1: P= 0.9522<br/> Trial2: P= 0.9916<br/> Trial3: P= 0.8581<br/> Trial4: P= 0.5523<br/> Trial5: P= 0.3675</p> |
|  |  | <p><i>Speed test</i><br/> Mixed-effects model,<br/> Tukey's post-hoc test for<br/> multiple comparisons</p> | <p><i>Speed test</i><br/> trial: F<sub>(3.629, 162.4)</sub> = 17.83,<br/> P&lt;0.0001<br/> genotype: F<sub>(2, 45)</sub> = 1.410,<br/> P=0.2548<br/> trial × genotype: F<sub>(8, 179)</sub> =<br/> 0.9646, P= 0.4652</p>                                                                                                                                                                                                                                                                                                                                                                                                                                                                                                                                                                                                                                                                                                                                                                                                                                                                                                                             |

|     |                                                                                                                                                                                                                                                       |                                                                                                                                                                                                                                                                                                                                                                                                                                                             |                                                                                                                                                                                                                                                                                                                                                                                                                                                                                                                                                                                                                                                                                                                                                                                                                                                                                                                                                                                                               |
|-----|-------------------------------------------------------------------------------------------------------------------------------------------------------------------------------------------------------------------------------------------------------|-------------------------------------------------------------------------------------------------------------------------------------------------------------------------------------------------------------------------------------------------------------------------------------------------------------------------------------------------------------------------------------------------------------------------------------------------------------|---------------------------------------------------------------------------------------------------------------------------------------------------------------------------------------------------------------------------------------------------------------------------------------------------------------------------------------------------------------------------------------------------------------------------------------------------------------------------------------------------------------------------------------------------------------------------------------------------------------------------------------------------------------------------------------------------------------------------------------------------------------------------------------------------------------------------------------------------------------------------------------------------------------------------------------------------------------------------------------------------------------|
| S1G | <p><i>Trial 1-4</i><br/>wild-type=17<br/>MNK1<sup>KO</sup>=14<br/>MNK2<sup>KO</sup>=17</p> <p><i>Trial 5</i><br/>wild-type=17<br/>MNK1<sup>KO</sup>=14<br/>MNK2<sup>KO</sup>=16</p> <p><i>Trial 5 is missing from one MNK2<sup>KO</sup> mouse</i></p> | <p><i>Nose to tail stimulus</i><br/><i>Trial 1-4</i><br/>RM two-way ANOVA<br/>Tukey's post-hoc test for multiple comparisons</p> <p><i>Trial 5</i><br/>Kruskal-Wallis test, Dunn's post-hoc test for multiple comparisons</p> <p><i>Nose to body stimulus</i><br/><i>Trial 1-4</i><br/>RM two-way ANOVA<br/>Tukey's post-hoc test for multiple comparisons</p> <p><i>Trial 5</i><br/>Kruskal-Wallis test, Dunn's post-hoc test for multiple comparisons</p> | <p><i>Nose to tail stimulus</i><br/>trial: <math>F_{(2.405, 108.2)} = 9.880</math>, <math>P &lt; 0.0001</math><br/>genotype: <math>F_{(2, 45)} = 0.1016</math>, <math>P = 0.9036</math><br/>trial <math>\times</math> genotype: <math>F_{(6, 135)} = 0.2036</math>, <math>P = 0.9752</math></p> <p><i>Trial 5</i><br/><math>K_{(3)} = 1.752</math>, <math>P = 0.4164</math></p> <p><i>Nose to body stimulus</i><br/>trial: <math>F_{(1.831, 82.39)} = 1.237</math>, <math>P = 0.2933</math><br/>genotype: <math>F_{(2, 45)} = 1.049</math>, <math>P = 0.3587</math><br/>trial <math>\times</math> genotype: <math>F_{(6, 135)} = 0.7871</math>, <math>P = 0.5815</math></p> <p><i>Trial 5</i><br/><math>K_{(3)} = 1.133</math>, <math>P = 0.5676</math></p>                                                                                                                                                                                                                                                   |
| S1H | <p><i>Trial 1-4</i><br/>wild-type=17<br/>MNK1<sup>KO</sup>=14<br/>MNK2<sup>KO</sup>=17<br/><i>Trial 5</i><br/>wild-type=17<br/>MNK1<sup>KO</sup>=14<br/>MNK2<sup>KO</sup>=16</p> <p><i>Trial 5 is missing from one MNK2<sup>KO</sup> mouse</i></p>    | <p><i>Sniffing stimulus</i><br/><i>Trial 1-4</i><br/>RM two-way ANOVA<br/>Tukey's post-hoc test for multiple comparisons</p> <p><i>Trial 5</i><br/>Kruskal-Wallis test, Dunn's post-hoc test for multiple comparisons</p>                                                                                                                                                                                                                                   | <p><i>Sniffing stimulus</i><br/>trial: <math>F_{(2.726, 122.7)} = 0.8485</math>, <math>P = 0.4608</math><br/>genotype: <math>F_{(2, 45)} = 4.349</math>, <math>P = 0.0188</math><br/>trial <math>\times</math> genotype: <math>F_{(6, 135)} = 1.347</math>, <math>P = 0.2405</math></p> <p>wild-type vs MNK1<sup>KO</sup><br/>Trial1: <math>P = 0.2406</math><br/>Trial2: <math>P = 0.0848</math><br/>Trial3: <math>P = 0.8704</math><br/>Trial4: <math>P = 0.5397</math></p> <p>wild-type vs MNK2<sup>KO</sup><br/>Trial1: <math>P = 0.0840</math><br/>Trial2: <math>P = 0.0009</math><br/>Trial3: <math>P = 0.1845</math><br/>Trial4: <math>P = 0.7983</math></p> <p>MNK1<sup>KO</sup> vs MNK2<sup>KO</sup><br/>Trial1: <math>P = 0.8235</math><br/>Trial2: <math>P = 0.5235</math><br/>Trial3: <math>P = 0.4831</math><br/>Trial4: <math>P = 0.8956</math></p> <p><i>Trial 5</i><br/><math>K_{(3)} = 7.106</math>, <math>P = 0.0286</math><br/>wild-type vs MNK1<sup>KO</sup>: <math>P = 0.1021</math></p> |

|  |  |                                                                                                                                                                                                                               |                                                                                                                                                                                                                                                                                                                                                                                                                                                                                                                                                                                                                                                                                                                                                                                                                                                                                                                                                              |
|--|--|-------------------------------------------------------------------------------------------------------------------------------------------------------------------------------------------------------------------------------|--------------------------------------------------------------------------------------------------------------------------------------------------------------------------------------------------------------------------------------------------------------------------------------------------------------------------------------------------------------------------------------------------------------------------------------------------------------------------------------------------------------------------------------------------------------------------------------------------------------------------------------------------------------------------------------------------------------------------------------------------------------------------------------------------------------------------------------------------------------------------------------------------------------------------------------------------------------|
|  |  | <p><i>Climbing stimulus</i><br/> <i>Trial 1-4</i><br/> RM two-way ANOVA<br/> Tukey's post-hoc test for multiple comparisons</p> <p><i>Trial 5</i><br/> Kruskal-Wallis test, Dunn's post-hoc test for multiple comparisons</p> | <p>wild-type vs MNK2<sup>KO</sup>: P= 0.0465<br/> MNK1<sup>KO</sup> vs MNK2<sup>KO</sup>: P &gt;0.9999</p> <p><i>Climbing stimulus</i><br/> trial: F<sub>(2,199, 98.94)</sub> = 13.31, P&lt;0.0001<br/> genotype: F<sub>(2, 45)</sub> = 9.062, P=0.0005<br/> trial × genotype: F<sub>(6, 135)</sub> = 1.747, P=0.1149</p> <p>wild-type vs MNK1<sup>KO</sup><br/> Trial1: P= 0.0098<br/> Trial2: P= 0.0122<br/> Trial3: P= 0.0029<br/> Trial4: P= 0.3759</p> <p>wild-type vs MNK2<sup>KO</sup><br/> Trial1: P= 0.1692<br/> Trial2: P= 0.1393<br/> Trial3: P= 0.0425<br/> Trial4: P&gt;0.9999</p> <p>MNK1<sup>KO</sup> vs MNK2<sup>KO</sup><br/> Trial1: P= 0.6840<br/> Trial2: P= 0.2173<br/> Trial3: P= 0.5598<br/> Trial4: P= 0.2081</p> <p><i>Trial 5</i><br/> K<sub>(3)</sub>= 8.680, P= 0.0130<br/> wild-type vs MNK1<sup>KO</sup>: P= 0.0100<br/> wild-type vs MNK2<sup>KO</sup>: P= 0.7436<br/> MNK1<sup>KO</sup> vs MNK2<sup>KO</sup>: P = 0.2177</p> |
|  |  | <p><i>Speed stimulus</i><br/> <i>Trial 1-4</i><br/> RM two-way ANOVA<br/> Tukey's post-hoc test for multiple comparisons</p> <p><i>Trial 5</i><br/> Kruskal-Wallis test, Dunn's post-hoc test for multiple comparisons</p>    | <p><i>Speed stimulus</i><br/> trial: F<sub>(2,267, 102.0)</sub> = 48.06, P&lt;0.0001<br/> genotype: F<sub>(2, 45)</sub> = 3.162, P=0.0519<br/> trial × genotype: F<sub>(6, 135)</sub> = 3.638, P=0.0022</p> <p>wild-type vs MNK1<sup>KO</sup><br/> Trial1: P= 0.0014<br/> Trial2: P= 0.0247<br/> Trial3: P= 0.0725<br/> Trial4: P= 0.7854</p> <p>wild-type vs MNK2<sup>KO</sup><br/> Trial1: P= 0.9622<br/> Trial2: P= 0.9987<br/> Trial3: P= 0.6026</p>                                                                                                                                                                                                                                                                                                                                                                                                                                                                                                     |

|       |                                                                                                                                                                          |                                                                     |                                                                                                                                                                                                                                                                                                                                                                                                                                                  |
|-------|--------------------------------------------------------------------------------------------------------------------------------------------------------------------------|---------------------------------------------------------------------|--------------------------------------------------------------------------------------------------------------------------------------------------------------------------------------------------------------------------------------------------------------------------------------------------------------------------------------------------------------------------------------------------------------------------------------------------|
|       |                                                                                                                                                                          |                                                                     | <p>Trial4: P= 0.8590</p> <p>MNK1<sup>KO</sup> vs MNK2<sup>KO</sup><br/> Trial1: P= 0.0272<br/> Trial2: P= 0.0407<br/> Trial3: P= 0.4160<br/> Trial4: P= 0.9713</p> <p><i>Trial 5</i><br/> K<sub>(3)</sub>= 6.324, P= 0.0423<br/> wild-type vs MNK1<sup>KO</sup>: P= 0.1265<br/> wild-type vs MNK2<sup>KO</sup>: P&gt;0.9999<br/> MNK1<sup>KO</sup> vs MNK2<sup>KO</sup>: P = 0.0570</p>                                                          |
| S1I   | wild-type=17<br>MNK1 <sup>KO</sup> =15<br>MNK2 <sup>KO</sup> =17                                                                                                         | RM two-way ANOVA                                                    | <p>trial: F<sub>(3.039, 136.8)</sub> = 67.06,<br/> P&lt;0.0001<br/> genotype: F<sub>(2, 45)</sub> = 0.8909,<br/> P=0.4174<br/> trial × genotype: F<sub>(8, 180)</sub> = 1.699,<br/> P=0.1013</p>                                                                                                                                                                                                                                                 |
| S1J   | wild-type=17<br>MNK1 <sup>KO</sup> =15<br>MNK2 <sup>KO</sup> =17                                                                                                         | One-way ANOVA, Tukey's<br>post-hoc test for multiple<br>comparisons | <p>F<sub>(2, 45)</sub> = 6.475, P=0.0034<br/> wild-type vs MNK1<sup>KO</sup>: P= 0.0423<br/> wild-type vs MNK2<sup>KO</sup>: P= 0.5220<br/> MNK1<sup>KO</sup> vs MNK2<sup>KO</sup>: P = 0.0027</p>                                                                                                                                                                                                                                               |
| S2A-B | <i>females:</i><br>wild-type=10<br>MNK1 <sup>KO</sup> =8<br>MNK2 <sup>KO</sup> =12<br><br><i>males:</i><br>wild-type=7<br>MNK1 <sup>KO</sup> =6<br>MNK2 <sup>KO</sup> =5 | Three-way Repeated<br>Measures ANOVA                                | <p>Genotype: F<sub>(2, 42)</sub>=0.28, P=0.760<br/> Sex: F<sub>(1, 42)</sub>=1.19, P=0.2820<br/> genotype x Sex F<sub>(2, 42)</sub>=1.63,<br/> P=0.2080<br/> trials: F<sub>(3.35, 140.79)</sub>=81.16,<br/> P&lt;0.0001<br/> genotype x trials:<br/> F<sub>(6.7, 140.79)</sub>=1.887, P=0.0820<br/> Sex x trials<sub>(3.35, 140.79)</sub>: F=0.86,<br/> P=0.4720<br/> Sex x trials x genotype<sub>(6.7, 140.79)</sub>:<br/> F=0.67, P=0.6880</p> |
| S2C   | <i>females:</i><br>wild-type=10<br>MNK1 <sup>KO</sup> =8<br>MNK2 <sup>KO</sup> =12<br><br><i>males:</i><br>wild-type=7<br>MNK1 <sup>KO</sup> =6<br>MNK2 <sup>KO</sup> =5 | Two-way ANOVA, Tukey's<br>post-hoc test for multiple<br>comparisons | <p>Interaction: F<sub>(2, 42)</sub> = 0.2222,<br/> P=0.8017<br/> Sex: F<sub>(1, 42)</sub> = 0.2822, P=0.5980<br/> Genotype: F<sub>(2, 42)</sub> = 6.141,<br/> P=0.0046</p> <p>wild-type vs MNK1<sup>KO</sup>: P= 0.0060<br/> wild-type vs MNK2<sup>KO</sup>: P= 0.9260<br/> MNK1<sup>KO</sup> vs MNK2<sup>KO</sup>: P = 0.0209</p>                                                                                                               |
| S2D-E | <i>females:</i><br>wild-type=10<br>MNK1 <sup>KO</sup> =8                                                                                                                 | Three-way Repeated<br>Measures ANOVA                                | <p>Genotype: F<sub>(2, 43)</sub> =2.48,<br/> P=0.0950<br/> Sex: F<sub>(1, 43)</sub> =2.23, P=0.1430</p>                                                                                                                                                                                                                                                                                                                                          |

|       |                                                                                                                                                                               |                                                                                        |                                                                                                                                                                                                                                                                                                                                                                                                                                                                                                                                                                                                                                                                                                                                   |
|-------|-------------------------------------------------------------------------------------------------------------------------------------------------------------------------------|----------------------------------------------------------------------------------------|-----------------------------------------------------------------------------------------------------------------------------------------------------------------------------------------------------------------------------------------------------------------------------------------------------------------------------------------------------------------------------------------------------------------------------------------------------------------------------------------------------------------------------------------------------------------------------------------------------------------------------------------------------------------------------------------------------------------------------------|
|       | <p>MNK2<sup>KO</sup>=12</p> <p><i>males:</i><br/>wild-type=7<br/>MNK1<sup>KO</sup>=7<br/>MNK2<sup>KO</sup>=5</p>                                                              |                                                                                        | <p>genotype x sex: <math>F_{(2, 42)} = 2.06</math>, <math>P = 0.139</math><br/> trials: <math>F_{(3.87, 166.45)} = 42.84</math>, <math>P &lt; 0.0001</math><br/> genotype x trials: <math>F_{(7.74, 166.45)} = 1.47</math>, <math>P = 0.175</math><br/> Sex x trials: <math>F_{(3.87, 166.45)} = 0.58</math>, <math>P = 0.669</math><br/> Sex x trials x genotype: <math>F_{(7.74, 166.45)} = 1.62</math>, <math>P = 0.125</math></p>                                                                                                                                                                                                                                                                                             |
| S2F-G | <p><i>females:</i><br/>wild-type=10<br/>MNK1<sup>KO</sup>=8<br/>MNK2<sup>KO</sup>=12</p> <p><i>males:</i><br/>wild-type=7<br/>MNK1<sup>KO</sup>=7<br/>MNK2<sup>KO</sup>=5</p> | Three-way Repeated Measures ANOVA                                                      | <p>Genotype: <math>F_{(2, 43)} = 9.80</math>, <math>P &lt; 0.0001</math><br/> Sex: <math>F_{(1, 43)} = 0.54</math>, <math>P = 0.465</math><br/> genotype x sex: <math>F_{(2, 43)} = 1.74</math>, <math>P = 0.188</math><br/> trials: <math>F_{(2.43, 104.6)} = 34.96</math>, <math>P &lt; 0.0001</math><br/> genotype x trials: <math>F_{(4.86, 104.6)} = 5.89</math>, <math>P &lt; 0.0001</math><br/> Sex x trials: <math>F_{(2.43, 104.6)} = 0.83</math>, <math>P = 0.461</math><br/> Sex x trials x genotype: <math>F_{(4.86, 104.6)} = 0.61</math>, <math>P = 0.689</math></p>                                                                                                                                                |
| S2H   | <p><i>females:</i><br/>wild-type=10<br/>MNK1<sup>KO</sup>=8<br/>MNK2<sup>KO</sup>=12</p> <p><i>males:</i><br/>wild-type=7<br/>MNK1<sup>KO</sup>=7<br/>MNK2<sup>KO</sup>=5</p> | Two-way ANOVA, Tukey's post-hoc test for multiple comparisons                          | <p>Interaction: <math>F_{(2, 43)} = 0.9540</math>, <math>P = 0.3932</math><br/> Sex: <math>F_{(1, 43)} = 0.6882</math>, <math>P = 0.4114</math><br/> Genotype: <math>F_{(2, 43)} = 14.51</math>, <math>P &lt; 0.0001</math></p> <p>Wild-type vs MNK1<sup>KO</sup> : <math>P = 0.0221</math><br/> Wild-type vs MNK2<sup>KO</sup>: <math>P = 0.0211</math><br/> MNK1<sup>KO</sup> vs MNK2<sup>KO</sup>: <math>P &lt; 0.0001</math></p>                                                                                                                                                                                                                                                                                              |
| S2I   | <p><i>females:</i><br/>wild-type=10<br/>MNK1<sup>KO</sup>=8<br/>MNK2<sup>KO</sup>=12</p> <p><i>males:</i><br/>wild-type=7<br/>MNK1<sup>KO</sup>=7<br/>MNK2<sup>KO</sup>=5</p> | Three-way Repeated Measures ANOVA, Bonferroni's post-hoc test for multiple comparisons | <p>Genotype: <math>F_{(2, 43)} = 11.66</math>, <math>P &lt; 0.0001</math><br/> Sex: <math>F_{(1, 43)} = 0.51</math>, <math>P = 0.479</math><br/> Novelty: <math>F_{(1, 43)} = 21.05</math>, <math>P &lt; 0.0001</math><br/> genotype x sex: <math>F_{(2, 43)} = 3.23</math>, <math>P = 0.049</math><br/> genotype x novelty: <math>F_{(2, 43)} = 4.62</math>, <math>P = 0.015</math><br/> Sex x novelty: <math>F_{(1, 43)} = 0.70</math>, <math>P = 0.409</math><br/> Sex x novelty x genotype: <math>F_{(2, 43)} = 0.52</math>, <math>P = 0.596</math></p> <p><u>Post-hoc: Novelty x genotype</u><br/> <u>Familiar vs novel object</u><br/> Wild-type: <math>P = 0.004</math><br/> MNK1<sup>KO</sup>: <math>P = 0.772</math></p> |

|     |                                                                                                                                                                       |                                                               |                                                                                                                                                                                                                                                                                                                                                                                                                                                                                                                                                                                        |
|-----|-----------------------------------------------------------------------------------------------------------------------------------------------------------------------|---------------------------------------------------------------|----------------------------------------------------------------------------------------------------------------------------------------------------------------------------------------------------------------------------------------------------------------------------------------------------------------------------------------------------------------------------------------------------------------------------------------------------------------------------------------------------------------------------------------------------------------------------------------|
|     |                                                                                                                                                                       |                                                               | <p>MNK2<sup>KO</sup>: P=0.003</p> <p><u>Post-hoc: Novelty x sex</u></p> <p><i>female</i></p> <p>Wild-type vs MNK1<sup>KO</sup>: P=0.0056<br/> Wild-type vs MNK2<sup>KO</sup>: P=0.056<br/> MNK1<sup>KO</sup> vs MNK2<sup>KO</sup>: P&lt;0.0001</p> <p><i>male</i></p> <p>Wild-type vs MNK1<sup>KO</sup>: P=0.158<br/> Wild-type vs MNK2<sup>KO</sup>: P&gt;0.9999<br/> MNK1<sup>KO</sup> vs MNK2<sup>KO</sup>: P=0.687</p> <p><u>Post-hoc: Novelty x sex</u></p> <p><i>Female vs male</i></p> <p>Wild-type: P=0.38<br/> MNK1<sup>KO</sup>: P=0.017<br/> MNK2<sup>KO</sup>: P=0.115</p> |
| S2J | <p>females:<br/> wild-type=10<br/> MNK1<sup>KO</sup>=8<br/> MNK2<sup>KO</sup>=12</p> <p>males:<br/> wild-type=7<br/> MNK1<sup>KO</sup>=7<br/> MNK2<sup>KO</sup>=5</p> | Two-way ANOVA, Tukey's post-hoc test for multiple comparisons | <p>Interaction: F<sub>(2, 43)</sub> = 0.8828, P=0.4210<br/> Sex: F<sub>(1, 43)</sub> = 1.423, P=0.2394<br/> Genotype: F<sub>(2, 43)</sub> = 5.574, P=0.0070</p> <p>Wild-type vs MNK1<sup>KO</sup>: P=0.0497<br/> Wild-type vs MNK2<sup>KO</sup>: P=0.6531<br/> MNK1<sup>KO</sup> vs MNK2<sup>KO</sup>: P=0.0071</p>                                                                                                                                                                                                                                                                    |
| S2K | <p>females:<br/> wild-type=10<br/> MNK1<sup>KO</sup>=6<br/> MNK2<sup>KO</sup>=12</p> <p>males:<br/> wild-type=6<br/> MNK1<sup>KO</sup>=7<br/> MNK2<sup>KO</sup>=5</p> | Two-way ANOVA                                                 | <p>Interaction: F<sub>(2, 40)</sub> = 2.049, P=0.1422<br/> Sex: F<sub>(1, 40)</sub> = 0.01534, P=0.9020<br/> Genotype: F<sub>(2, 40)</sub> = 2.453, P=0.0989</p>                                                                                                                                                                                                                                                                                                                                                                                                                       |
| S2L | <p>females:<br/> wild-type=10<br/> MNK1<sup>KO</sup>=6<br/> MNK2<sup>KO</sup>=12</p> <p>males:<br/> wild-type=6<br/> MNK1<sup>KO</sup>=7<br/> MNK2<sup>KO</sup>=5</p> | Two-way ANOVA                                                 | <p>Interaction: F<sub>(2, 40)</sub> = 0.1024, P=0.9029<br/> Sex: F<sub>(1, 40)</sub> = 2.415, P=0.1281<br/> Genotype: F<sub>(2, 40)</sub> = 0.1471, P=0.8637</p>                                                                                                                                                                                                                                                                                                                                                                                                                       |
| S3A | <p>wild-type= 13<br/> MNK1/2<sup>DKO</sup>=15</p>                                                                                                                     | Two-way Repeated Measures ANOVA                               | <p>Genotype x trial: F<sub>(4, 104)</sub> = 0.2954, P=0.8804<br/> Trial: F<sub>(2.730, 70.97)</sub> = 27.66, P&lt;0.0001</p>                                                                                                                                                                                                                                                                                                                                                                                                                                                           |

|     |                                            |                                                                                 |                                                                                                                                                                                                                                                                                                                                                                                                                                                          |
|-----|--------------------------------------------|---------------------------------------------------------------------------------|----------------------------------------------------------------------------------------------------------------------------------------------------------------------------------------------------------------------------------------------------------------------------------------------------------------------------------------------------------------------------------------------------------------------------------------------------------|
|     |                                            |                                                                                 | Genotype: $F_{(1, 26)} = 0.2456$ ,<br>$P=0.6243$                                                                                                                                                                                                                                                                                                                                                                                                         |
| S3B | wild-type= 13<br>MNK1/2 <sup>DKO</sup> =15 | Unpaired t-test                                                                 | $t=0.1726$ , $df=26$<br>$P=0.8635$                                                                                                                                                                                                                                                                                                                                                                                                                       |
| S3C | wild-type= 13<br>MNK1/2 <sup>DKO</sup> =16 | Two-way Repeated Measures ANOVA                                                 | Genotype x trial: $F_{(11, 297)} = 0.3062$ , $P=0.9843$<br>Trial: $F_{(3.989, 107.7)} = 19.90$ ,<br>$P<0.0001$<br>Genotype: $F_{(1, 27)} = 0.6022$ ,<br>$P=0.4445$                                                                                                                                                                                                                                                                                       |
| S3D | wild-type= 13<br>MNK1/2 <sup>DKO</sup> =16 | Two-way Repeated Measures ANOVA                                                 | Genotype x trial: $F_{(4, 108)} = 0.9991$ , $P=0.4114$<br>Trial: $F_{(2.182, 58.92)} = 21.69$ ,<br>$P<0.0001$<br>Genotype: $F_{(1, 27)} = 0.8417$ ,<br>$P=0.3670$                                                                                                                                                                                                                                                                                        |
| S3E | wild-type= 13<br>MNK1/2 <sup>DKO</sup> =16 | Unpaired t-test                                                                 | $t=0.09051$ , $df=27$<br>$P=0.9286$                                                                                                                                                                                                                                                                                                                                                                                                                      |
| S3F | wild-type= 13<br>MNK1/2 <sup>DKO</sup> =16 | Two-way Repeated Measures ANOVA, Šídák's post-hoc test for multiple comparisons | Genotype x trial: $F_{(1, 27)} = 0.2934$ ,<br>$P=0.5925$<br>Trial: $F_{(1, 27)} = 27.39$ , $P<0.0001$<br>Genotype: $F_{(1, 27)} = 0.1725$ ,<br>$P=0.6812$<br><br>Familiar vs novel object:<br>wild-type: $P=0.0078$<br>MNK1/2 <sup>DKO</sup> : $P=0.0004$                                                                                                                                                                                                |
| S3G | wild-type= 13<br>MNK1/2 <sup>DKO</sup> =16 | Mann-Whitney test                                                               | $U=104$<br>$P>0.9999$                                                                                                                                                                                                                                                                                                                                                                                                                                    |
| S3H | wild-type= 13<br>MNK1/2 <sup>DKO</sup> =16 | Two-way Repeated Measures ANOVA, Tukey's post-hoc test for multiple comparisons | Genotype x time: $F_{(9, 243)} = 1.131$ , $P=0.3416$<br>Time: $F_{(4.908, 132.5)} = 6.144$ ,<br>$P<0.0001$<br>Genotype: $F_{(1, 27)} = 18.34$ ,<br>$P=0.0002$<br><br>wild-type vs MNK1/2 <sup>DKO</sup><br>Minute 1: $P=0.0035$<br>Minute 2: $P=0.0104$<br>Minute 3: $P=0.0437$<br>Minute 4: $P=0.0335$<br>Minute 5: $P=0.0343$<br>Minute 6: $P=0.0404$<br>Minute 7: $P=0.1042$<br>Minute 8: $P=0.4245$<br>Minute 9: $P=0.3170$<br>Minute 10: $P=0.1799$ |
| S3I | wild-type= 13<br>MNK1/2 <sup>DKO</sup> =16 | Two-way Repeated Measures ANOVA                                                 | Genotype x time: $F_{(9, 243)} = 0.4459$ , $P=0.9089$                                                                                                                                                                                                                                                                                                                                                                                                    |

|     |                                            |                                                                                          |                                                                                                                                                                                                                                                                                                                                                                                                                                                                                                                                                                                                 |
|-----|--------------------------------------------|------------------------------------------------------------------------------------------|-------------------------------------------------------------------------------------------------------------------------------------------------------------------------------------------------------------------------------------------------------------------------------------------------------------------------------------------------------------------------------------------------------------------------------------------------------------------------------------------------------------------------------------------------------------------------------------------------|
|     |                                            |                                                                                          | Time: $F_{(4.466, 120.6)} = 2.781$ ,<br>$P=0.0250$<br>Genotype: $F_{(1, 27)} = 0.2810$ ,<br>$P=0.6004$                                                                                                                                                                                                                                                                                                                                                                                                                                                                                          |
| S3J | wild-type= 13<br>MNK1/2 <sup>DKO</sup> =15 | Two-way Repeated<br>Measures ANOVA                                                       | <i>Nose to tail:</i><br>Genotype x trial: $F_{(4, 104)} = 2.360$ ,<br>$P=0.0581$<br>Trial: $F_{(2.535, 65.91)} = 19.31$ ,<br>$P<0.0001$<br>Genotype: $F_{(1, 26)} = 0.8639$ ,<br>$P=0.3612$<br><br><i>Nose to body:</i><br>Genotype x trial: $F_{(4, 104)} = 0.7983$ , $P=0.5290$<br>Trial: $F_{(3.376, 87.78)} = 3.135$ ,<br>$P=0.0247$<br>Genotype: $F_{(1, 26)} = 0.9439$ ,<br>$P=0.3402$<br><br><i>Nose to nose:</i><br>Genotype x trial: $F_{(4, 104)} = 0.8784$ , $P=0.4796$<br>Trial: $F_{(2.175, 56.56)} = 0.6077$ ,<br>$P=0.5615$<br>Genotype: $F_{(1, 26)} = 0.01554$ ,<br>$P=0.9018$ |
| S3K | wild-type= 13<br>MNK1/2 <sup>DKO</sup> =15 | Two-way Repeated<br>Measures ANOVA                                                       | <i>Side by side:</i><br>Genotype x trial: $F_{(4, 104)} = 0.3384$ , $P=0.8515$<br>Trial: $F_{(2.790, 72.53)} = 3.958$ ,<br>$P=0.0131$<br>Genotype: $F_{(1, 26)} = 0.002354$ ,<br>$P=0.9617$<br><br><i>Side by side reverse:</i><br>Genotype x trial: $F_{(4, 104)} = 0.3721$ , $P=0.8281$<br>Trial: $F_{(3.338, 86.79)} = 4.022$ ,<br>$P=0.0077$<br>Genotype: $F_{(1, 26)} = 0.05315$ ,<br>$P=0.8195$                                                                                                                                                                                           |
| S3L | wild-type= 13<br>MNK1/2 <sup>DKO</sup> =15 | Two-way Repeated<br>Measures ANOVA, Tukey's<br>post-hoc test for multiple<br>comparisons | <i>Sniffing test:</i><br>Genotype x trial: $F_{(4, 104)} = 0.7951$ , $P=0.5310$<br>Trial: $F_{(2.426, 63.09)} = 0.8449$ ,<br>$P=0.4537$<br>Genotype: $F_{(1, 26)} = 3.936$ ,<br>$P=0.0579$                                                                                                                                                                                                                                                                                                                                                                                                      |



|     |                                            |                                                                                                                                              |                                                                                                                                                                                                                                                                                                                                                                                                                                                                                                                                                                                                                                                                                                                                                           |
|-----|--------------------------------------------|----------------------------------------------------------------------------------------------------------------------------------------------|-----------------------------------------------------------------------------------------------------------------------------------------------------------------------------------------------------------------------------------------------------------------------------------------------------------------------------------------------------------------------------------------------------------------------------------------------------------------------------------------------------------------------------------------------------------------------------------------------------------------------------------------------------------------------------------------------------------------------------------------------------------|
|     |                                            |                                                                                                                                              | <p><i>Climbing test:</i><br/> Genotype x trial: <math>F_{(4, 104)} = 0.7891</math>, <math>P=0.5348</math><br/> Trial: <math>F_{(2.636, 68.55)} = 0.3906</math>, <math>P=0.7345</math><br/> Genotype: <math>F_{(1, 26)} = 5.317</math>, <math>P=0.0293</math></p> <p>wild-type vs MNK1/2<sup>DKO</sup><br/> Trial 1: <math>P=0.8295</math><br/> Trial 2: <math>P=0.3322</math><br/> Trial 3: <math>P=0.2598</math><br/> Trial 4: <math>P=0.0716</math><br/> Trial 5: <math>P=0.0336</math></p> <p><i>Speed:</i><br/> Genotype x trial: <math>F_{(4, 104)} = 0.7477</math>, <math>P=0.5617</math><br/> Trial: <math>F_{(3.310, 86.06)} = 7.521</math>, <math>P&lt;0.0001</math><br/> Genotype: <math>F_{(1, 26)} = 0.3190</math>, <math>P=0.5770</math></p> |
| S3M | wild-type= 13<br>MNK1/2 <sup>DKO</sup> =15 | <p><i>Trial 1-4</i><br/> RM two-way ANOVA<br/> Tukey's post-hoc test for multiple comparisons<br/> <i>Trial 5</i><br/> Mann Whitney test</p> | <p><i>Nose to tail stimulus:</i><br/> <i>Trial 1-4</i><br/> Genotype x trial: <math>F_{(3, 78)} = 1.480</math>, <math>P=0.2264</math><br/> Trial: <math>F_{(2.643, 68.71)} = 8.680</math>, <math>P=0.0001</math><br/> Genotype: <math>F_{(1, 26)} = 0.4082</math>, <math>P=0.5285</math></p> <p><i>Trial 5</i><br/> <math>U=58.50</math>, <math>P=0.0731</math></p> <p><i>Nose to body stimulus:</i><br/> <i>Trial 1-4</i><br/> Genotype x trial: <math>F_{(3, 78)} = 2.327</math>, <math>P=0.0811</math><br/> Trial: <math>F_{(2.684, 69.78)} = 1.908</math>, <math>P=0.1424</math><br/> Genotype: <math>F_{(1, 26)} = 0.6106</math>, <math>P=0.4416</math></p> <p><i>Trial 5</i><br/> <math>U=96</math>, <math>P=0.9639</math></p>                      |
| S3N | wild-type= 13<br>MNK1/2 <sup>DKO</sup> =15 | <p><i>Sniffing stimulus:</i><br/> <i>Trial 1-4</i><br/> RM two-way ANOVA<br/> Tukey's post-hoc test for multiple comparisons</p>             | <p><i>Sniffing stimulus:</i><br/> <i>Trial 1-4</i><br/> Genotype x trial: <math>F_{(3, 78)} = 0.4744</math>, <math>P=0.7010</math><br/> Trial: <math>F_{(2.283, 59.36)} = 0.3091</math>,</p>                                                                                                                                                                                                                                                                                                                                                                                                                                                                                                                                                              |

|     |                                                                                                       |                                                                                                                                                                                                                                                                                                                                                                                  |                                                                                                                                                                                                                                                                                                                                                                                                                                                                                                                                                                                                                                                                                    |
|-----|-------------------------------------------------------------------------------------------------------|----------------------------------------------------------------------------------------------------------------------------------------------------------------------------------------------------------------------------------------------------------------------------------------------------------------------------------------------------------------------------------|------------------------------------------------------------------------------------------------------------------------------------------------------------------------------------------------------------------------------------------------------------------------------------------------------------------------------------------------------------------------------------------------------------------------------------------------------------------------------------------------------------------------------------------------------------------------------------------------------------------------------------------------------------------------------------|
|     |                                                                                                       | <p><i>Trial 5</i><br/>Unpaired t-test</p> <p><i>Climbing stimulus:</i><br/><i>Trial 1-4</i><br/>RM two-way ANOVA<br/>Tukey's post-hoc test for multiple comparisons<br/><i>Trial 5</i><br/>Unpaired t-test</p> <p><i>Speed stimulus:</i><br/><i>Trial 1-4</i><br/>RM two-way ANOVA<br/>Tukey's post-hoc test for multiple comparisons<br/><i>Trial 5</i><br/>Unpaired t-test</p> | <p>P=0.7635<br/>Genotype: F<sub>(1, 26)</sub> = 1.249, P=0.2739</p> <p><i>Trial 5</i><br/>t=0.2977, df=26, P=0.7683</p> <p><i>Climbing stimulus:</i><br/><i>Trial 1-4</i><br/>Genotype x trial: F<sub>(3, 78)</sub> = 0.2593, P=0.8545<br/>Trial: F<sub>(2.485, 64.62)</sub> = 3.488, P=0.0275<br/>Genotype: F<sub>(1, 26)</sub> = 1.224, P=0.2786</p> <p><i>Trial 5</i><br/>t=1.495, df=26, P=0.1469</p> <p><i>Speed stimulus:</i><br/><i>Trial 1-4</i><br/>Genotype x trial: F<sub>(3, 78)</sub> = 0.06861, P=0.9765<br/>Trial: F<sub>(2.731, 71.02)</sub> = 15.05, P&lt;0.0001<br/>Genotype: F<sub>(1, 26)</sub> = 3.580, P=0.0697</p> <p><i>Trial 5</i><br/>U=69, P=0.2005</p> |
| S3O | wild-type= 13<br>MNK1/2 <sup>DKO</sup> =16                                                            | Mixed-effects model,<br>Tukey's post-hoc test for multiple comparisons                                                                                                                                                                                                                                                                                                           | <p>Genotype x trial: F<sub>(4, 107)</sub> = 0.6498, P= 0.6282<br/>Trial: F<sub>(2.370, 63.41)</sub> = 4.601, P=0.0097<br/>Genotype: F<sub>(1, 27)</sub> = 14.24, P= 0.0008</p> <p>wild-type vs MNK1/2<sup>DKO</sup><br/>Trial 1: P=0.0032<br/>Trial 2: P=0.1093<br/>Trial 3: P&lt;0.0001<br/>Trial 4: P=0.0943<br/>Trial 5: P=0.1019</p>                                                                                                                                                                                                                                                                                                                                           |
| S3P | wild-type= 13<br>MNK1/2 <sup>DKO</sup> =16                                                            | Mann Whitney test                                                                                                                                                                                                                                                                                                                                                                | U=79, P=0.2875                                                                                                                                                                                                                                                                                                                                                                                                                                                                                                                                                                                                                                                                     |
| S5B | Mean log <sub>2</sub> value of ETC-168 treated wild-type relative to vehicle-treated wild-type from 4 | Kolmogorov-Smirnov test                                                                                                                                                                                                                                                                                                                                                          | WT ETC-168: D= 0.3506, P=0.0002                                                                                                                                                                                                                                                                                                                                                                                                                                                                                                                                                                                                                                                    |

|     |                                                                                                                                                                                                                                                  |                              |                                                                                                                                                               |
|-----|--------------------------------------------------------------------------------------------------------------------------------------------------------------------------------------------------------------------------------------------------|------------------------------|---------------------------------------------------------------------------------------------------------------------------------------------------------------|
|     | mice per treatment.<br>Ribosomes: 77<br>All: 77 randomly selected proteins                                                                                                                                                                       |                              |                                                                                                                                                               |
| S5B | Ribosomal proteins: 30<br>All: 680                                                                                                                                                                                                               | Wilcoxon-Mann-Whitney U test | $W = 6762$ , $P = 0.001379$                                                                                                                                   |
| S6C | Mean $\log_2$ value relative to wild-type from 3 mice per genotype.<br>Number of pairs: 18141 RNAs / genotype                                                                                                                                    | Pearson r                    | $\text{MNK1}^{\text{KO}}$ logFC vs $\text{MNK2}^{\text{KO}}$ logFC: $r = 0.2649$ (95% confidence interval 0.2513 – 0.2784), $P < 0.0001$                      |
| S6D | logFC value of $\text{MNK1}^{\text{KO}}$ relative to wild-type from 3 (mRNA) or 4 (protein) mice per genotype.<br>Number of pairs: 8294 genes/proteins                                                                                           | Pearson r                    | $\text{MNK1}^{\text{KO}}$ logFC protein vs $\text{MNK1}^{\text{KO}}$ logFC RNA: $r = -0.02401$ (95% confidence interval: -0.04551 to -0.002487), $P = 0.0288$ |
| S6E | logFC value of $\text{MNK2}^{\text{KO}}$ relative to wild-type from 3 (mRNA) or 4 (protein) mice per genotype.<br>Number of pairs: 8294 genes/proteins                                                                                           | Pearson r                    | $\text{MNK2}^{\text{KO}}$ logFC protein vs $\text{MNK2}^{\text{KO}}$ logFC RNA: $r = 0.09438$ (95% confidence interval: 0.07301 to 0.1157), $P < 0.0001$      |
| S6H | wild-type= 18<br>$\text{MNK1}^{\text{KO}}$ =18<br>$\text{MNK2}^{\text{KO}}$ =18<br>$\text{MNK1/2}^{\text{DKO}}$ =18<br><br>N= mean fluorescent intensity of neurons per image. 5-7 images were analysed per animal, with 3 animals per genotype. | Kruskal-Wallis test          | $K_{(4)} = 3.024$ , $P = 0.3880$                                                                                                                              |
| S6I | wild-type= 8<br>$\text{MNK1}^{\text{KO}}$ =7<br>$\text{MNK2}^{\text{KO}}$ =11<br>$\text{MNK1/2}^{\text{DKO}}$ =5                                                                                                                                 | Kruskal-Wallis test          | $K_{(4)} = 1.930$ , $P = 0.5870$                                                                                                                              |

|     |                                                                                              |                                                                    |                                                                                                                                                                                                                                                                                                                                                                          |
|-----|----------------------------------------------------------------------------------------------|--------------------------------------------------------------------|--------------------------------------------------------------------------------------------------------------------------------------------------------------------------------------------------------------------------------------------------------------------------------------------------------------------------------------------------------------------------|
| S6J | wild-type= 10<br>MNK1 <sup>KO</sup> =7<br>MNK2 <sup>KO</sup> =8<br>MNK1/2 <sup>DKO</sup> =7  | Kruskal-Wallis test                                                | K <sub>(4)</sub> = 2.694, P=0.4412                                                                                                                                                                                                                                                                                                                                       |
| S7C | wild-type=6<br>MNK1 <sup>KO</sup> =7<br>MNK2 <sup>KO</sup> =7                                | Kruskal-Wallis test, Dunn's post-hoc test for multiple comparisons | K <sub>(3)</sub> =12.46, P=0.0002<br>wild-type vs MNK1 <sup>KO</sup> : P=0.0200<br>wild-type vs MNK2 <sup>KO</sup> : P=0.0023<br>MNK1 <sup>KO</sup> vs MNK2 <sup>KO</sup> : P>0.9999                                                                                                                                                                                     |
| S7D | wild-type=6<br>MNK1 <sup>KO</sup> =7<br>MNK2 <sup>KO</sup> =7                                | Kruskal-Wallis test, Dunn's post-hoc test for multiple comparisons | K <sub>(3)</sub> =15.43, P<0.0001<br>wild-type vs MNK1 <sup>KO</sup> : P=0.0003<br>wild-type vs MNK2 <sup>KO</sup> : P=0.0950<br>MNK1 <sup>KO</sup> vs MNK2 <sup>KO</sup> : P=0.1920                                                                                                                                                                                     |
| S7E | wild-type=14<br>MNK1 <sup>KO</sup> =14<br>MNK2 <sup>KO</sup> =16<br>MNK1/2 <sup>DKO</sup> =8 | One-way ANOVA                                                      | F <sub>F (3, 48)</sub> = 2.378, P=0.0814                                                                                                                                                                                                                                                                                                                                 |
| S7F | wild-type=14<br>MNK1 <sup>KO</sup> =15<br>MNK2 <sup>KO</sup> =15<br>MNK1/2 <sup>DKO</sup> =8 | One-way ANOVA                                                      | F <sub>(3, 48)</sub> = 1.523, P=0.2204                                                                                                                                                                                                                                                                                                                                   |
| S7G | wild-type=8<br>MNK1 <sup>KO</sup> =6<br>MNK2 <sup>KO</sup> =9<br>MNK1/2 <sup>DKO</sup> =9    | One-way ANOVA, Tukey's post-hoc test for multiple comparisons      | F <sub>(3, 28)</sub> = 4.855, P=0.0076<br><br>wild-type vs MNK1 <sup>KO</sup> : P= 0.0038<br>wild-type vs MNK2 <sup>KO</sup> : P= 0.3164<br>wild-type vs MNK1/2 <sup>DKO</sup> : P= 0.1924<br>MNK1 <sup>KO</sup> vs MNK2 <sup>KO</sup> : P= 0.1274<br>MNK1 <sup>KO</sup> vs MNK1/2 <sup>DKO</sup> : P= 0.2121<br>MNK2 <sup>KO</sup> vs MNK1/2 <sup>DKO</sup> : P= 0.9893 |
| S7H | wild-type=9<br>MNK1 <sup>KO</sup> =9<br>MNK2 <sup>KO</sup> =11<br>MNK1/2 <sup>DKO</sup> =7   | One-way ANOVA, Tukey's post-hoc test for multiple comparisons      | F <sub>(3, 32)</sub> = 7.421, P=0.0007<br><br>wild-type vs MNK1 <sup>KO</sup> : P= 0.0054<br>wild-type vs MNK2 <sup>KO</sup> : P= 0.0022<br>wild-type vs MNK1/2 <sup>DKO</sup> : P= 0.8317<br>MNK1 <sup>KO</sup> vs MNK2 <sup>KO</sup> : P= 0.9985<br>MNK1 <sup>KO</sup> vs MNK1/2 <sup>DKO</sup> : P= 0.0738<br>MNK2 <sup>KO</sup> vs MNK1/2 <sup>DKO</sup> : P= 0.0417 |
| S7I | wild-type=8<br>MNK1 <sup>KO</sup> =8<br>MNK2 <sup>KO</sup> =9                                | One-way ANOVA                                                      | F <sub>(2, 22)</sub> = 0.9563, P=0.3997                                                                                                                                                                                                                                                                                                                                  |
| S7J | wild-type=9<br>MNK1 <sup>KO</sup> =9                                                         | One-way ANOVA                                                      | F <sub>(3, 31)</sub> = 0.7150, P=0.5505                                                                                                                                                                                                                                                                                                                                  |

|     |                                                                                           |                   |                                    |
|-----|-------------------------------------------------------------------------------------------|-------------------|------------------------------------|
|     | MNK2 <sup>KO</sup> =10<br>MNK1/2 <sup>DKO</sup> =7                                        |                   |                                    |
| S7K | wild-type=6<br>MNK1 <sup>KO</sup> =7<br>MNK2 <sup>KO</sup> =7<br>MNK1/2 <sup>DKO</sup> =4 | One-way ANOVA     | $F_{(3, 20)} = 1.050$ , $P=0.3922$ |
| S7L | wild-type=14<br>MNK2 <sup>KO</sup> =16                                                    | Mann-Whitney test | Mann-Whitney U = 52, $P=0.0118$    |
| S7M | wild-type=8<br>MNK2 <sup>KO</sup> =9                                                      | Mann-Whitney test | Mann-Whitney U = 19, $P=0.1139$    |
