# Supplementary material for: Distinct roles for MNK1 and MNK2 in social and cognitive behavior through kinase-specific regulation of the synaptic proteome and phosphoproteome
Source: Mol Psychiatry. 2026 Feb 13;31(6):3446–61. doi: 10.1038/s41380-026-03483-w (PMC13190234; doi:10.1038/s41380-026-03483-w)
Supplement: Supplementary file 3 — Supplementary Table 2 [file 41380_2026_3483_MOESM3_ESM.xlsx]

## Sheet: Figure 1L, LDA Behavior
	classical tests									DeepOF								DLCAnalyzer
ID	SR index	NOR DI	NO 1st trial	SO Index	SO S1	OI trial1	OH DI	OF distance	OF time in center	nose to nose	nose to tail test	side by side	side by side reverse	nose to body test	climbing test	sniffing test	speed test	OH distance traveled	NOR distance traveled
Wildtype	1.64402	0.414798	-1.49547	0.433838	-0.0750703	-0.63106	-0.473142	0.148012	-0.245629	-0.685633	-1.2669	-0.406333	-0.947081	-1.45626	0.609017	-0.555401	1.46128	0.801984	-0.174677
Wildtype	-1.19656	-0.37482	-0.24108	0.371838	-1.39918	-0.472678	-1.00331	-0.52533	-1.07532	2.02585	-1.26409	1.97715	1.84152	-0.161704	0.146776	1.59713	-1.12853	-0.0498166	1.34844
Wildtype	-0.354909	1.8664	-0.617085	-1.50908	0.0883806	-0.704482	0.00969005	0.115509	1.07151	-1.03117	-0.594011	-0.662254	-1.17773	-1.0879	0.604621	-0.424555	1.18315	-1.01388	-1.5358
Wildtype	-0.470738	0.866093	-0.197073	2.35195	1.92201	-0.354154	-0.122852	1.68476	-0.0589479	-0.981525	0.0547765	0.0129096	-1.45694	-0.348773	-0.912007	-1.63071	1.0552	-0.0484465	2.45355
Wildtype	0.470053	0.925229	0.315086	-0.299308	0.72142	-0.303807	1.28493	-1.16899	0.285894	0.779926	0.613176	-0.848908	1.323	1.27634	-1.00652	-0.415039	-0.541678	-0.106799	-0.597279
Wildtype	0.989006	-1.57898	-1.14054	-0.74648	-0.459473	-0.531415	-1.02698	1.40381	-0.668254	1.0778	0.00656939	-0.679752	0.629314	0.515547	-0.663631	1.00761	-0.519708	-1.02066	-0.58333
Wildtype	0.807929	-0.845764	-0.551326	-0.560481	-0.433385	0.369578	0.125191	-0.803618	-1.03125	-0.16534	-1.28297	-1.28346	-0.591568	-0.120053	-1.21533	-0.662455	-1.20413	-0.332205	-1.12847
Wildtype	0.377998	-0.647846	-1.2745	-1.3254	-1.32039	-1.52052	-0.615151	-0.56004	-0.642326	1.15724	-0.140061	0.765359	-0.215245	0.746674	-0.835076	-0.279436	-0.0628567	2.43198	-0.431904
Wildtype	0.486745	1.74581	0.914754	0.0176653	0.594173	2.47679	1.42505	0.223597	0.807045	-0.0303018	-0.652261	0.355595	-0.48058	1.82286	0.890363	-0.719552	1.03882	-1.32434	-0.548772
Wildtype	-0.583532	0.204944	2.16805	-0.920079	1.21976	1.70796	-0.79503	0.13804	-0.406382	-0.812728	1.17559	0.861603	-0.310627	0.830939	0.0617123	0.0250774	0.44402	0.983503	-0.750831
Wildtype	-1.21325	-1.13961	0.879009	0.365638	0.279783	0.109454	0.484001	-0.195624	-0.280632	-0.85443	0.641296	-0.211659	-0.090383	-0.276545	1.38052	-0.093873	1.54122	0.236331	0.762852
Wildtype	-1.08706	-1.12808	-0.470308	-0.830567	-0.0742717	0.834235	0.810623	-0.712276	-0.447867	-0.741237	-0.788848	0.355595	1.97332	-1.57182	-0.821888	0.508016	-0.930366	-0.256277	0.556926
Wildtype	0.0117971	-0.855062	-0.981624	1.38786	0.102756	-0.277585	-0.922838	-0.834065	3.18464	-0.153425	0.645314	-0.513513	0.393461	0.741859	1.70143	-1.20249	0.385102	-0.309333	-0.938191
Wildtype	2.17966	0.119404	0.535715	-0.0737841	-1.39918	-0.494704	1.3957	-0.506757	-0.346748	0.905034	0.631253	0.725987	0.565148	1.16078	1.42448	1.68087	-1.01412	-0.32407	0.832496
Wildtype	-0.966929	0.542427	0.0775962	-0.339608	-1.39918	0.0507168	-1.98601	-1.41256	-0.315634	1.33795	-0.981676	1.86049	-0.239525	-0.8977	0.648581	-0.422177	-1.10826	-0.720873	-0.0132099
Wildtype	-0.60781	-0.419608	0.972167	0.726011	0.321045	-1.08208	1.13062	1.01561	0.363677	-1.00933	2.17187	-1.39283	-0.326235	-0.839918	-0.876839	-0.231855	0.392776	1.77718	0.322779
Wildtype	-0.486418	0.304666	1.10663	0.949985	1.3108	0.823746	0.279508	1.98992	-0.193773	-0.818685	1.03097	-0.915987	-0.889853	-0.334327	-1.1362	1.81885	-0.991925	-0.724282	0.425425
Wildtype	0.365895	-2.84729	0.198938	-0.107572	-0.011576	-0.157757	0.206366	-1.46988	-0.328533	-0.994151	1.0389	-0.352984	-1.29936	0.108056	1.21117	1.2505	0.737063	-0.564264	-0.793413
Wildtype	1.31996	-0.284246	0.0536044	1.17942	-0.014043	-0.543543	0.445533	-0.798496	2.09874	-0.7632	0.7112	-0.83471	-0.8317	0.25681	1.36833	0.98875	1.1602	-0.947208	-0.644098
Wildtype	-0.689975	0.654902	-0.0395583	-0.583449	0.58462	0.534412	-0.679496	0.407635	-0.435977	1.65392	1.0389	-0.956029	1.98181	2.05133	1.65614	0.706146	-0.327354	-0.723746	-0.348534
Wildtype	-1.47894	1.4811	-0.84821	1.78797	0.632316	0.124565	-0.229484	1.70922	1.41989	1.97662	0.356989	1.87192	0.000698518	-0.227121	-0.566944	0.231284	-0.39085	-0.807443	-0.825393
Wildtype	1.40023	0.163454	0.210118	-0.865614	-0.0905206	-0.870779	0.912066	0.0331368	0.0768267	0.255534	0.867822	0.0898769	0.379063	1.61824	-0.259702	0.38185	0.13677	-0.287956	-0.416805
Wildtype	0.163596	0.455421	0.61258	-0.41362	-1.78947	1.98773	-0.365589	-1.04203	-1.49089	0.375757	1.61238	1.23472	-0.880133	0.962946	-0.264999	0.222018	0.632294	0.951909	-0.665102
Wildtype	0.855981	0.278935	1.32807	-0.655096	-0.654646	0.945062	-1.03431	1.55221	-0.509235	-1.04793	-0.327333	-0.811157	-1.54757	-1.00669	1.31712	1.0675	1.75445	0.0470936	0.712042
Wildtype	-0.0158626	-0.0298533	0.674068	-0.404774	-0.742636	1.48244	-0.892701	-0.208041	-0.0696888	-0.731558	-0.874309	0.416133	0.177773	-0.524637	-0.886545	-1.61025	-1.00131	-0.58096	1.79893
Wildtype	-0.253401	0.335064	0.174716	-0.646251	1.17095	-0.285283	0.48251	-0.0192508	-0.145388	-0.994151	-0.0333635	-1.01492	-0.298966	-0.366464	-0.840636	0.493037	-0.222291	0.0274579	2.08631
Wildtype	-0.639727	0.043916	0.150494	0.194052	0.765535	-0.538731	-0.483599	-1.17372	-0.826685	-0.601844	-0.917682	-0.844136	-0.202105	-1.12532	-0.483953	-1.08212	0.580735	0.802227	0.671762
Wildtype	-1.47111	0.197651	-2.82139	1.49431	0.850236	-1.63032	2.39113	0.482811	-1.0953	0.552928	-1.40683	1.59749	0.640891	-0.615022	-1.162	-1.6589	-2.03371	-0.334082	-0.842601
Wildtype	-0.779378	-0.782501	-0.365628	-1.58031	-1.78947	-0.52269	0.609961	0.905479	0.777659	-0.187392	-0.920091	-0.307049	0.79829	-1.01799	-0.70997	-0.896803	-0.124046	2.72556	-0.440779
Wildtype	1.22273	0.333449	0.672204	0.600936	1.08871	-0.525096	-1.36238	-0.379071	0.528583	0.505471	-1.14659	-0.089152	1.08131	-0.11414	-0.378008	-0.0930124	-0.901949	-0.308591	-0.292314
MNK1KO	-1.37157	-0.832983	-1.88791	-1.64238	0.504196	-1.94112	-0.936092	-2.65047	-1.48498	-0.348038	0.996824	2.65086	5.06195	1.45932	-0.973551	0.158302	-0.333414	-1.15717	-3.32651
MNK1KO	-0.762585	-4.22448	-1.76474	-1.1549	-1.39918	-1.78379	-0.880235	-1.56457	-0.541208	-0.439387	-0.594011	0.884935	-0.36959	0.156818	-0.962561	-3.23892	-0.0762292	0.706325	-1.65716
MNK1KO	-0.174338	0.913045	-1.2052	-0.848005	-1.39918	-1.6254	-0.0130314	-1.08092	-0.499723	3.19075	-0.282673	0.839729	-1.37023	1.36542	-1.38018	-2.91538	-1.2679	-1.35622	-0.353526
MNK1KO	-0.967941	-0.407025	-1.22898	-0.307833	-0.629845	-2.0072	-1.83738	-0.61789	-1.34497	1.97144	-0.778805	0.715779	0.313688	-0.791766	-1.32523	-2.49191	0.03758	0.172586	-1.74231
MNK1KO	-0.72465	0.229484	0.941395	-0.679831	-1.39918	-1.48276	-1.93584	-0.185234	-0.97939	0.0332454	-0.471484	2.39129	0.0778354	0.737044	0.259533	-0.824229	0.143901	-0.744087	-0.343692
MNK1KO	-1.39383	0.582147	0.0850151	0.567912	-1.39918	-1.82469	-1.93584	-1.05207	0.0447638	0.8256	-0.346949	0.027492	1.05419	1.49784	-0.977947	-0.919389	0.17748	1.53474	-0.651084
MNK1KO	-1.24259	-1.32225	-1.71003	-1.11615	-1.39918	-1.61701	-0.688996	-2.66029	-1.15051	0.815671	0.0869146	0.581622	0.0951774	2.04195	-0.254801	-0.890841	0.433849	-0.74837	-2.90533
MNK1KO	-1.44946	-0.564664	0.0967336	0.354013	-1.39918	-1.61911	-1.32141	-0.824398	-0.411568	0.440345	-1.13232	1.64176	3.5133	-0.861586	0.723314	-0.0153658	-0.716752	2.12394	-0.195953
MNK1KO	-0.0972032	-0.671911	-1.24466	-0.205533	0.359379	0.860457	-1.69916	-1.74748	1.47339	0.853402	0.936565	0.814939	1.87101	2.3116	0.39581	1.3597	-0.25472	-1.56586	-1.76497
MNK1KO	-2.43047	-1.55205	-0.423097	-0.145859	-1.20911	-0.58386	-0.422965	0.520839	0.228852	0.863332	0.520779	-0.202909	4.11854	2.92553	-0.406464	-1.20725	-0.109209	0.107219	1.24335
MNK1KO	0.378503	-0.832983	-1.79589	0.97246	1.0627	-1.27403	-0.619885	-1.67898	-0.829008	0.414529	0.583046	1.37782	2.74505	4.0282	-1.22632	-2.68461	0.381481	-1.1458	-2.7985
MNK1KO	-0.898646	-0.981259	-0.629646	-0.414007	-0.717693	-0.636304	-1.50981	-0.666605	1.01706	2.00321	-0.722563	1.59218	4.15496	0.888721	-1.84396	-1.54983	-1.95293	-0.0338921	1.27282
MNK1KO	-1.26788	-2.27742	-0.464407	0.566362	-1.39918	-0.256607	-1.93584	0.642628	0.335157	0.867303	-0.338915	2.42337	1.14958	-1.38162	-1.82418	-2.41341	-1.11179	-2.93241	-0.64034
MNK1KO	-2.66389	-0.499922	-0.915697	-0.096259	0.0585655	-1.04747	-1.93584	-1.10048	1.02743	-1.09472	1.01088	-0.306444	2.57336	-0.661757	-1.79121	-3.12473	-1.35197	-2.24175	-1.21066
MNK2KO	0.225751	-0.155388	-0.428324	0.804286	-0.912024	-0.0216564	-0.269595	-0.406205	-0.331191	-1.42238	-0.190276	-1.1391	0.041417	-2.09667	-0.551533	-1.87813	1.23938	-1.96654	-1.14303
MNK2KO	-0.358956	0.337245	0.92015	1.52658	0.0835889	2.24499	3.66406	1.11334	1.13633	0.398642	0.916479	1.76425	0.0275433	-0.0165273	-0.77573	-1.68305	1.30072	0.0264791	1.23451
MNK2KO	0.0264653	-0.77358	2.17226	0.0967149	-0.221484	-0.237727	1.80753	-0.20982	0.853715	1.30816	-0.471484	2.15797	2.88378	0.900759	-0.613077	-1.61644	-0.198701	-1.28366	0.766436
MNK2KO	-1.27648	-0.0740913	0.848911	0.0649401	-0.00638896	-1.04117	0.119511	-0.599849	0.16144	-0.353996	-0.242501	3.84515	2.92887	1.06929	-0.6988	-3.12473	0.0112292	-1.03816	-0.365156
MNK2KO	1.05729	1.3107	0.115871	-0.0737841	0.0420607	-0.0657097	-1.09136	0.376823	0.56073	1.22873	-0.158138	1.07159	1.74614	2.04917	-0.711988	-2.17788	-0.253901	0.309211	2.28135
MNK2KO	0.408346	0.165243	-0.639763	2.05823	0.357249	2.5628	4.36086	-1.29077	-0.97939	-0.808756	0.245596	-1.09535	0.422943	-0.160982	-1.12521	-3.09618	0.183058	-1.44035	-1.10092
MNK2KO	0.787191	-0.280066	-0.056366	0.243189	-0.585655	-0.516731	-0.333026	-1.33645	-0.118582	1.29228	0.671426	3.19041	3.09709	4.68547	-1.27688	-2.43006	-1.01783	-0.0548096	2.62039
MNK2KO	-1.76053	0.741378	-0.567766	-1.07895	-1.39918	-0.993975	-0.608524	-0.879736	-0.0770975	-0.798827	2.98537	-0.477058	-0.239525	6.69338	-0.670226	-2.96296	0.488241	-0.287836	-0.376597
MNK2KO	-0.761574	-2.06533	-0.218739	-0.848005	-1.39918	-0.656233	2.7855	-0.773171	0.0940269	0.364883	0.564968	-0.443518	0.556477	2.13344	-0.641651	-2.10651	-0.0202453	-0.74721	0.448276
MNK2KO	0.235867	0.366954	0.0484263	-0.676731	0.0420607	-0.233532	1.41842	-0.598099	-0.582692	0.952695	-0.877228	2.99063	3.56359	2.36216	-0.784522	-2.15409	-0.721218	-0.56571	0.512544
MNK2KO	-0.710488	0.046536	-0.806858	-1.59433	-0.412088	2.0478	-1.63004	-1.13854	-0.829008	-0.733293	1.46684	-0.894113	0.433348	2.50661	-1.2527	-3.11521	0.196611	-0.942704	-0.550029
MNK2KO	0.478652	0.883496	1.10663	0.582637	0.791699	-0.130741	3.63377	-0.287917	-0.294892	0.390699	0.550908	0.877644	2.28028	0.385538	-0.472405	-0.445966	-1.08196	0.212609	-0.657249
MNK2KO	-0.90421	-0.91763	0.953198	0.00604041	-0.215627	-0.062563	-0.278116	-0.721563	1.34116	0.563468	3.04563	0.176232	-0.771926	1.70248	-1.09664	-1.71398	0.21203	0.549672	0.181055
MNK2KO	0.665799	2.24111	2.41296	1.09103	0.56915	3.96097	0.243532	0.0420553	1.22448	1.40944	-0.549821	1.36907	3.87922	0.619072	-0.555929	1.79744	-0.979602	1.56364	0.465707
MNK2KO	-0.513225	0.597476	-1.33124	0.211414	-0.715564	0.011908	2.8139	0.741582	-0.67344	-1.78182	1.27201	-0.605382	-0.445895	0.505916	0.129851	-2.10414	0.640192	-0.426331	2.63515
MNK2KO	-0.179902	1.23749	-0.906929	0.250939	0.709175	-1.56876	3.15188	-0.461086	0.12514	0.0153727	1.16354	-0.433311	1.85366	2.86293	-0.142703	-1.36902	0.853497	1.40281	-0.0946373
MNKDKO	0.859244	-0.429169	0.817538	1.27937	-1.78947	-0.291699	-0.630718	-0.863291	-0.868198	4.62785	1.88226	0.597518	-0.521444	1.61447	-1.26795	-1.10991	0.277399	-0.847085	-0.406924
MNKDKO	1.1901	0.0799477	-0.168123	0.97863	0.459625	-0.194651	-1.10197	0.454022	-0.120969	0.426377	1.53046	-0.196334	0.285228	0.801006	-0.718799	-0.774034	-0.596333	-0.807527	-0.764806
MNKDKO	2.20682	0.0799477	-0.0768234	1.12723	-1.78947	-0.815438	-1.14524	-1.62218	-1.63008	-1.07008	1.83407	-0.242269	0.183827	0.414988	-0.791195	-0.368664	-0.237884	-1.32542	-0.981641
MNKDKO	0.598865	-0.198853	-0.851937	-0.738242	-1.78947	-0.282877	1.33926	-1.68738	-0.645983	1.73617	0.12085	2.52915	0.0128062	0.254931	-0.326801	0.486088	-0.489081	-0.825743	-0.904124
MNKDKO	1.56729	-0.890457	-0.782996	0.596513	0.224435	0.742143	1.71689	-0.660391	1.84722	1.35336	0.790715	0.300707	-0.359504	1.47324	-0.960707	-0.0814304	-0.38971	-0.619921	-0.57407
MNKDKO	-0.525526	-0.000402723	-1.39973	-2.1756	3.18486	-1.34238	-0.367163	-1.3866	-1.16855	0.666823	-0.252636	-0.257581	-0.541119	0.891391	-0.280891	0.0297568	1.51277	-0.657899	-0.641683
MNKDKO	1.54641	0.734359	-0.37867	-1.13805	-1.78947	-0.768117	-1.32619	-2.00966	0.755682	0.119493	1.48468	0.453824	-0.914943	1.03262	0.241773	-0.00962197	-0.114092	-0.879462	-1.14049
MNKDKO	-0.595351	0.339463	-0.844484	-0.693131	-0.253344	-0.0510844	-0.945412	-2.65485	0.328345	-0.782179	-0.151433	0.492692	0.429007	0.234218	-1.22734	-1.2211	-0.927835	-1.38524	-0.645365
MNKDKO	-1.34908	0.592184	-1.31216	0.417838	3.75474	-0.653424	-0.132716	-1.2356	1.08778	-0.934039	-0.0430018	-0.43072	-1.98042	0.352848	-1.06489	-0.947764	-0.0352634	-1.2384	-0.770886
MNKDKO	-2.55961	-0.0937991	-0.251969	-0.691362	0.937404	1.31561	0.419571	-1.46526	-0.958549	-0.861273	0.778667	-1.14801	-0.939158	-0.0557663	-0.879482	-0.514597	0.1536	-0.948543	0.293755
MNKDKO	-0.513779	0.4058	1.45663	1.77736	0.192364	1.06537	0.979725	-1.90318	-1.43472	-1.0163	-0.358658	-0.693375	-0.975481	-0.409773	0.231178	-0.438156	0.36055	-1.00342	-0.0704114
MNKDKO	-0.700416	0.255994	0.476563	-0.655096	0.228547	1.32523	-1.3018	-2.299	-1.9109	-2.41151	-1.81887	-1.1433	-1.8321	-1.70341	-0.325035	-1.21183	0.000304842	-0.935874	-0.0886647
MNKDKO	1.3924	0.69046	0.323776	-0.91161	-0.473731	0.487893	-0.18464	-0.949901	1.76664	-0.541733	-0.98756	-0.52848	0.799804	-0.242185	-0.754114	-1.22805	-0.314489	0.102623	0.75004
MNKDKO	-1.75694	1.0988	0.485879	-0.655096	0.643829	0.434958	0.553316	-1.65121	0.616492	0.894614	1.63407	0.465602	2.69768	0.200324	-1.01191	-0.827311	-0.86801	-0.964187	-0.614616
MNKDKO	-0.152904	0.167145	0.491469	-0.354356	2.28111	1.73107	1.17641	-0.722104	-0.384697	-1.20929	-0.744191	-0.461344	2.13013	0.130652	-0.874185	-0.600304	-0.967435	-0.335956	-0.154168
	classical tests										DeepOF: social habituation/recognition test merged trials
	SR index		social habituation/recognition test, recognition index								nose to nose
	NOR DI		Novel object recognition, discrimination index								nose to tail test
	NO 1st trial		Novel object recognition, total object interaction trial 1								side by side
	SO Index		social olfaction test, social odor recognition index								side by side reverse
	SO S1		social olfaction test, social odor interaction trial 1								nose to body test
	OI trial1		Object habituation/recognition test, time interacing trial 1								climbing test
	OH DI		Object habituation/recognition test, object recognition index								sniffing test
	OF distance		Open field, total distance traveled								speed test
	OF time in center		Open field, total time in center
											DLCAnalyzer
											OH distance traveled			Oject habituation/recognition test, distance traveled
											NOR distance traveled			Novel object recognition, distance traveled
