# Supplementary material for: Distinct roles for MNK1 and MNK2 in social and cognitive behavior through kinase-specific regulation of the synaptic proteome and phosphoproteome
Source: Mol Psychiatry. 2026 Feb 13;31(6):3446–61. doi: 10.1038/s41380-026-03483-w (PMC13190234; doi:10.1038/s41380-026-03483-w)
Supplement: Supplementary file 4 — Supplementary Table 3 [file 41380_2026_3483_MOESM4_ESM.xlsx]

## Sheet: TMT all proteins
protein names		normalized protein expression																LogFC over WT			p-value / WT			adjusted p-value / WT
id	GeneName	CX_WT	CX_WT	CX_WT	CX_WT	CX_MNK1KO	CX_MNK1KO	CX_MNK1KO	CX_MNK1KO	CX_MNK2KO	CX_MNK2KO	CX_MNK2KO	CX_MNK2KO	CX_MNKDKO	CX_MNKDKO	CX_MNKDKO	CX_MNKDKO	logFC.CX_MNK1KO.over.CX_WT	logFC.CX_MNK2KO.over.CX_WT	logFC.CX_MNKDKO.over.CX_WT	P.Value.CX_MNK1KO.over.CX_WT	P.Value.CX_MNK2KO.over.CX_WT	P.Value.CX_MNKDKO.over.CX_WT	adj.P.Val.CX_MNK1KO.over.CX_WT	adj.P.Val.CX_MNK2KO.over.CX_WT	adj.P.Val.CX_MNKDKO.over.CX_WT
0610009B22Rik	Q8R3W2	2.55	-0.8	-0.06	-0.94	-1.55	-0.86	-0.45	-0.88	-1.65	1.4	-0.36	0.18	-1.23	-0.75	-0.27	-0.09	-1.1225	-0.295	-0.7725	0.164084	0.750644	0.328114	0.999971	1	0.856472
0610010K14Rik	D3Z687	-1.05	1.85	0.28	1.08	2.47	1.24	-0.09	0.95	1.52	-0.15	0.24	1.1	2.61	1.21	1.3	0.97	0.6025	0.1375	0.9825	0.420356	0.836167	0.159477	0.999971	1	0.799489
0610012G03Rik	A0A0J9YTR2	-0.83	-2.86	-1.05	-0.63	-3.21	-2.2	-1.3	-0.62	-3.97	-1.57	-0.5	-1.11	-4.16	-2.2	-0.46	-0.2	-0.49	-0.445	-0.4125	0.482883	0.594268	0.662453	0.999971	1	0.936148
1110059G10Rik	Q8K039	2.96	2.95	3.36	5.02	3	2.74	3.66	3.83	2.48	2.95	3.66	2.65	0.67	2.37	2.96	2.46	-0.265	-0.6375	-1.4575	0.609042	0.238347	0.0453335	0.999971	1	0.710102
1110065P20Rik	V9GXF1	5.14	0.56	0.97	1.14	0.14	1.51	1.25	0.61	0.96	3.43	0.77	0.99	-0.58	0.73	0.97	1.05	-1.075	-0.415	-1.41	0.295736	0.71061	0.188364	0.999971	1	0.809025
1500009L16Rik	A0A1W2P6X0	-2.17	-2.24	-1.78	-1.82	-1.8	-2.38	-1.48	-1.66	-1.98	-3.37	-1.16	-1	-1.43	-3.04	-2.14	-2.23	0.1725	0.125	-0.2075	0.502498	0.808478	0.552571	0.999971	1	0.913595
1600014C10Rik	Q8WUR0	0.89	1.29	-0.76	-1.16	1.2	1.42	-0.14	-0.86	0.98	1.02	-0.39	-0.83	1.41	1.65	-0.52	-0.07	0.34	0.13	0.5525	0.644493	0.852209	0.456505	0.999971	1	0.887217
1700025G04Rik	Q8K207	-2.9	-1.28	-0.64	-1.01	-1.47	-1.88	-0.08	-1.03	-0.98	-3.16	-0.23	-0.82	-0.4	-2.77	-0.95	-1.63	0.3425	0.16	0.02	0.556655	0.828322	0.975382	0.999971	1	0.99925
1700037H04Rik	H7BXB9	-0.23	-0.23	0	0.16	0.04	-0.11	-0.42	0.69	-0.06	-0.44	-0.06	0.32	0.35	0.16	0.89	0.64	0.125	0.015	0.585	0.646839	0.945997	0.0281919	0.999971	1	0.678474
2210016F16Rik	G3X8U3	-0.2	1.01	0.61	0.37	0.9	1.02	0.27	0.45	0.69	-0.29	-0.2	0.2	0.03	0.88	0.44	0.19	0.2125	-0.3475	-0.0625	0.503902	0.315563	0.843933	0.999971	1	0.979814
2310061I04Rik	B8JJ66	-0.92	-0.87	-1.03	-0.82	-1.09	-0.96	-0.5	-0.63	-1.25	-0.94	-1.28	-1.04	-1.81	-0.79	-1.48	-1.65	0.115	-0.2175	-0.5225	0.572427	0.231181	0.0666549	0.999971	1	0.733937
2410002F23Rik	Q3TE80	-0.22	0.94	0.61	0.08	1.03	1.04	0.01	0.56	1.05	0.66	0.2	0.7	1.21	1.34	1.04	1.14	0.3075	0.3	0.83	0.390862	0.355646	0.0158371	0.999971	1	0.613095
2410004B18Rik	Q9CWU4	3.74	1.4	2.25	3.99	1.88	1.89	3.16	2.39	1.57	2.7	1.61	0.8	0.36	1.16	1.56	1.51	-0.515	-1.175	-1.6975	0.418426	0.105394	0.0212071	0.999971	1	0.640006
2900026A02Rik	A0A1D5RLN6	-1.19	-2.08	-1.16	-0.79	-1.98	-2.58	1.99	-1.7	-2.21	-1.88	-1.94	-2.1	-2.17	-2.49	-2.67	-1.54	0.2375	-0.7275	-0.9125	0.804101	0.0332477	0.0307633	0.999971	1	0.678474
2900026A02Rik_1	A0A1B0GR85	0.83	-0.28	-0.83	-0.71	0.09	-0.18	-0.33	-0.47	-0.28	0.56	-0.52	-0.94	-0.79	-0.48	-1.19	-0.9	0.025	-0.0475	-0.5925	0.9478	0.918222	0.154954	0.999971	1	0.795578
3110082I17Rik	Q9CXL3	2.69	3.06	1.89	1.91	2.09	2.13	1.68	1.4	3.07	2.87	1.69	1.34	1.57	1.96	1.82	2.45	-0.5625	-0.145	-0.4375	0.122134	0.764972	0.222559	0.999971	1	0.827753
4931406C07Rik	Q91V76	0.32	0.07	0.07	-0.38	0.61	0.38	0.5	-0.16	0.69	0.38	0.52	-0.14	0.71	0.22	-0.24	-0.05	0.3125	0.3425	0.14	0.234869	0.201803	0.609342	0.999971	1	0.92673
4933402D24Rik	Q9D4D3	-1.65	-1.69	-1.35	-1.77	-1.22	-0.84	-0.96	-2.22	-2.61	-1.26	-1.38	-1.16	-1.16	-1.21	-1.52	-1.18	0.305	0.0125	0.3475	0.363032	0.971154	0.0974992	0.999971	1	0.78268
4933427D14Rik	A0A0N4SUT6	1.56	0.69	-0.77	-0.27	0.58	0.99	0.26	-0.35	0.96	0.89	-0.47	-1.16	0.61	-0.58	-0.89	-0.59	0.0675	-0.2475	-0.665	0.900838	0.712785	0.257894	0.999971	1	0.839012
4933434E20Rik	H7BX33	-0.25	-0.3	-0.75	-0.47	-0.68	-0.25	-0.9	-0.44	0.03	0.26	-0.49	-0.65	-1.01	-0.03	-1.05	-0.38	-0.125	0.23	-0.175	0.578536	0.391959	0.546204	0.999971	1	0.911398
5031439G07Rik	B1APX2	-0.54	-0.55	-0.36	-0.05	-0.5	-0.41	-0.34	0	-0.62	-0.6	-0.04	0	-0.26	-0.4	-0.23	0.24	0.0625	0.06	0.2125	0.766713	0.801103	0.355848	0.999971	1	0.868793
5730455P16Rik	Q9CYI0	0.81	1.17	1.22	0.33	0.66	1.15	2.22	-0.03	1.1	0.8	0.57	0.15	1.32	1.37	0.04	-1.03	0.1175	-0.2275	-0.4575	0.806925	0.449901	0.423582	0.999971	1	0.87919
6030458C11Rik	Q8BGC1	0.97	1.28	0.93	1.17	0.69	-0.11	0.71	1.23	-0.23	0.62	0.74	0.73	1.19	0.67	0.63	1.13	-0.4575	-0.6225	-0.1825	0.150432	0.0418476	0.409533	0.999971	1	0.875847
6820408C15Rik	Q8BJX2	-0.64	-0.56	0.69	0.65	-0.48	-0.49	0.51	0.32	-0.4	-0.31	0.61	0.29	0.05	-0.7	0.68	0.94	-0.07	0.0125	0.2075	0.869729	0.976157	0.669015	0.999971	1	0.938711
8030462N17Rik	Q0VAW6	-0.39	0.54	1.57	1.89	0.87	0.21	1.41	1.72	0.61	-0.59	1.62	1.85	0.38	-0.3	1.57	0.79	0.15	-0.03	-0.2925	0.790417	0.965419	0.624656	0.999971	1	0.930479
A830018L16Rik	B7ZN57	-2.22	-1.98	-1.56	-1.65	-2.14	-2.96	-1.41	-1.24	-2.11	-4.92	-2.31	-1.79	-1.92	-2.91	-2.02	-2.03	-0.085	-0.93	-0.3675	0.832667	0.190246	0.225857	0.999971	1	0.828225
Aaas	P58742	1.32	-0.47	-0.9	-0.47	0.03	-0.69	-0.9	-0.52	-0.08	0.85	-0.82	-0.78	0.17	-0.32	-0.5	-0.12	-0.39	-0.0775	-0.0625	0.438387	0.893621	0.896336	0.999971	1	0.988571
Aacs	Q9D2R0	-0.21	-0.1	0.09	-0.09	0.09	-0.03	0.06	-0.09	0.38	0.12	1.05	0.81	1.02	0.69	0.48	1.03	0.085	0.6675	0.8825	0.619065	0.0225762	0.00193393	0.999971	1	0.476373
Aagab	Q8R2R3	0.86	0.23	-0.18	0.16	-0.51	-0.48	-0.09	0.63	-0.11	0.42	0.3	0.46	-0.01	0.44	0.08	0.7	-0.38	7.85046e-17	0.035	0.280254	1	0.902597	0.999971	1	0.990759
Aak1	Q3UHJ0	-0.34	-0.13	-0.03	-0.56	-0.52	-0.24	-0.34	-0.12	-0.48	-0.44	-0.24	-0.67	0.02	-0.28	-0.17	-0.2	-0.04	-0.1925	0.1075	0.842888	0.349786	0.587344	0.999971	1	0.920758
Aak1_1	A0A571BEI2	0.95	-0.49	-0.62	-0.04	-0.67	-0.74	-0.39	0.15	-0.39	-0.3	-0.57	-0.24	-0.58	-0.63	-0.15	0.01	-0.3625	-0.325	-0.2875	0.367561	0.372767	0.453714	0.999971	1	0.887217
Aak1_2	A0A571BDM4	-0.06	-2.53	-0.97	-1.41	-1.5	-1.73	-1.39	-1.38	-2.37	-0.75	-2.66	-0.84	-0.38	-1.37	-1.67	-1.18	-0.2575	-0.4125	0.0925	0.597058	0.533261	0.863278	0.999971	1	0.983079
Aamdc	D3Z442	0.14	-0.09	0.38	0.09	0.24	0.24	0.43	0.5	-0.12	-0.03	0.56	0.31	0	0.33	0.46	0.14	0.2225	0.05	0.1025	0.254647	0.822812	0.610864	0.999971	1	0.92673
Aamp	J3QN89	0.82	0.84	1.17	0.54	0.73	0.84	1.18	0.91	0.68	0.93	0.91	0.66	0.46	1.06	0.74	0.45	0.0725	-0.0475	-0.165	0.731467	0.813139	0.4826	0.999971	1	0.896345
Aar2	Q9D2V5	-0.49	-0.14	-0.04	0.29	0.13	-0.22	-0.08	0.35	0.13	-0.14	0.18	0.53	0.31	0	0.29	0.25	0.14	0.27	0.3075	0.559107	0.280519	0.187134	0.999971	1	0.809025
Aars1	Q8BGQ7	0.41	0.43	0.64	0.64	0.23	0.23	0.59	0.51	0.46	0.37	0.46	0.76	0.12	0.33	0.36	0.53	-0.14	-0.0175	-0.195	0.458065	0.922129	0.30183	0.999971	1	0.847402
Aars2	Q14CH7	0.51	-0.37	-0.38	-0.46	-0.76	-0.48	0.13	-0.48	-0.66	0.24	-0.5	-0.46	-0.49	-0.42	-0.55	-0.25	-0.2225	-0.17	-0.2525	0.470534	0.585386	0.348006	0.999971	1	0.86438
Aarsd1	Q3THG9	0.51	1.06	0.88	0.71	0.52	1.63	0.62	1.08	0.82	1.27	0.63	0.39	0.93	1.5	1.05	1.28	0.1725	-0.0125	0.4	0.557343	0.959635	0.0944273	0.999971	1	0.779538
Aasdhppt	Q9CQF6	-1.51	-0.36	2.27	1.41	0.16	-0.61	1.93	2.01	-0.21	-1.37	2.61	2.1	-1.54	-0.16	1.91	1.76	0.42	0.33	0.04	0.663122	0.77275	0.96985	0.999971	1	0.998787
Aass	Q99K67	0	-0.65	-0.76	-0.94	-0.61	-0.93	-1.24	-1.77	-0.86	-0.35	-0.92	-1.21	-0.68	-0.93	-1.23	-1.05	-0.55	-0.2475	-0.385	0.115156	0.394893	0.163285	0.999971	1	0.800215
Aatf	Q9JKX4	-0.96	1.28	-2.19	-2.12	0.64	0.71	-2.62	-1.55	1.1	0.19	-1.48	-2.19	1.37	1.23	-3.02	-1.97	0.2925	0.4025	0.4	0.777031	0.687011	0.745154	0.999971	1	0.961064
Aatk	B1AZF9	-0.15	0.01	-0.13	-0.34	-0.01	0.04	-0.47	0.15	-0.11	0.1	0.03	0.24	0.49	0.11	0.1	0.02	0.08	0.2175	0.3325	0.700369	0.24046	0.112505	0.999971	1	0.78268
Abat	P61922	-1.07	-1.21	-1.47	-0.88	-1.16	-1.28	-1.45	-0.51	-1.11	-1.45	-1.81	-1.46	-0.97	-0.87	-1.07	-1.23	0.0575	-0.3	0.1225	0.826695	0.207747	0.550475	0.999971	1	0.913169
Abca1	P41233	-1.07	-0.66	-0.84	-1.22	-0.76	-0.85	-1.17	-1.16	-0.79	-1.08	-0.79	-0.65	-0.59	-1.02	-0.56	-0.67	-0.0375	0.12	0.2375	0.859511	0.560094	0.281523	0.999971	1	0.844538
Abca2	A2AJ26	-0.24	1.01	0.71	0.83	1	0.84	0.73	0.64	1.29	0.13	1.14	1.07	1.18	0.92	0.93	0.8	0.225	0.33	0.38	0.458816	0.387123	0.226321	0.999971	1	0.828236
Abca3	Q8R420	-0.79	0.03	-0.67	-0.7	-0.18	-0.33	-0.73	-0.37	-0.09	-0.51	0.07	-0.16	0.69	0.02	-0.6	-0.44	0.13	0.36	0.45	0.605923	0.175893	0.211014	0.999971	1	0.822884
Abca5	Q8K448	-0.3	0.16	-0.9	-0.72	-0.1	0.65	-0.96	-0.99	-0.19	0.12	-0.88	-0.87	0.09	0.29	-1.29	-0.62	0.09	-0.015	0.0575	0.835056	0.96485	0.888616	0.999971	1	0.987485
Abca6	Q8K441	1.7	1.65	3.88	2.16	1.01	2.71	1.99	2.91	2.13	2.89	2.76	2.24	1.72	1.78	1.69	4.15	-0.1925	0.1575	-0.0125	0.755423	0.76098	0.986201	0.999971	1	0.99925
Abca7	E9Q6G4	0.8	0.78	0.33	0.43	-2.63	-2.93	-3.44	-3.85	0.15	0.05	0.29	0.12	0.49	-0.19	-0.13	0.35	-3.7975	-0.4325	-0.455	9.00948e-07	0.0470324	0.086573	0.00751596	1	0.760141
Abca8b	Q8K440-2	-0.19	-0.26	-0.43	-0.23	-0.61	-1.06	-0.52	-0.21	-0.68	-0.49	-0.51	-0.49	-0.12	-0.56	0.11	0.43	-0.3225	-0.265	0.2425	0.175462	0.134412	0.337435	0.999971	1	0.858827
Abca9	Q8K449	-0.13	0.88	1.47	1.95	1.29	0.83	1.45	0.58	0.8	0.46	0.7	0.39	1.02	1.26	1.59	0.52	-0.005	-0.455	0.055	0.991312	0.310444	0.906611	0.999971	1	0.991405
Abcb10	Q9JI39	-0.66	-0.29	-0.19	-0.07	-0.62	-0.47	-0.61	0.04	-0.81	-0.5	-0.3	-0.75	-1.15	-0.57	-0.3	0.16	-0.1125	-0.2875	-0.1625	0.63547	0.206335	0.601004	0.999971	1	0.92426
Abcb11	J3QNY6	-1.31	-1.46	-3.78	-1.38	-0.9	-4.23	-0.42	-4.11	-2.92	-1.94	-3.33	-3.39	-3.49	-2.89	-3.2	-3.21	-0.4325	-0.9125	-1.215	0.682566	0.172136	0.055606	0.999971	1	0.725348
Abcb1a	P21447	0.09	0.01	-0.37	0.08	0.49	-0.25	-0.27	-0.67	0.26	0.08	-0.02	0.09	-0.37	-0.32	-0.02	-0.37	-0.1275	0.15	-0.2225	0.651237	0.432507	0.279893	0.999971	1	0.843812
Abcb6	Q9DC29	-0.33	0.18	0.21	-0.33	0.03	0.18	0.58	-0.07	0.36	-0.37	0.95	0.39	0.06	0	0.42	-0.21	0.2475	0.4	0.135	0.318829	0.224048	0.571112	0.999971	1	0.91816
Abcb7	Q61102	0.03	-0.27	-0.3	-0.23	-0.34	-0.13	-0.44	-0.37	-0.51	-0.3	-0.33	-0.62	-0.51	-0.19	-0.21	-0.26	-0.1275	-0.2475	-0.1	0.484874	0.191661	0.587497	0.999971	1	0.920758
Abcb8	Q9CXJ4	0.14	-0.49	0	0.18	-0.26	-0.23	-0.11	-0.01	-0.81	-0.2	-0.73	-0.6	-0.6	-0.21	-0.32	-0.36	-0.11	-0.5425	-0.33	0.608164	0.0449901	0.158757	0.999971	1	0.798217
Abcb9	Q9JJ59	-0.58	-0.09	-0.57	-0.46	-0.07	-0.41	-0.74	-0.65	-0.38	-0.62	-0.35	-0.55	0.08	-0.21	-0.62	-0.49	-0.0425	-0.05	0.115	0.852102	0.794908	0.621927	0.999971	1	0.929641
Abcc1	O35379	-0.54	-0.14	-0.6	-0.24	-0.42	-0.22	-0.8	-0.21	-0.38	-0.56	-0.84	-0.6	-0.42	-0.41	-0.61	-0.87	-0.0325	-0.215	-0.1975	0.883099	0.299298	0.356189	0.999971	1	0.868793
Abcc4	E9Q236	-0.5	-0.91	-0.27	-0.04	-0.55	-0.98	0.36	-0.38	-0.82	-0.75	-0.45	0.3	-0.6	-0.7	-0.12	0.08	0.0425	2.15888e-16	0.095	0.89856	1	0.735131	0.999971	1	0.958235
Abcc5	Q9R1X5	3.07	-0.57	0.71	0.17	-0.83	-0.33	1.44	-0.38	-1.62	2.55	-0.16	-0.57	-1.4	-0.94	-0.22	-1.15	-0.87	-0.795	-1.7725	0.313642	0.462935	0.0391626	0.999971	1	0.700838
Abcc8	B2RUS7	-0.23	-0.71	-0.76	-0.63	-1.02	-0.64	-1.4	-0.88	-0.83	-0.5	-0.7	-1.17	-0.68	-0.84	-0.97	-0.55	-0.4025	-0.2175	-0.1775	0.11379	0.344494	0.399426	0.999971	1	0.871816
Abcd1	P48410	-0.22	-0.41	0.02	-0.8	-0.37	-0.85	-0.52	0.34	-0.37	0.15	-0.67	-0.36	-0.75	-0.79	-0.58	-0.23	0.0025	0.04	-0.235	0.993559	0.879146	0.352146	0.999971	1	0.867656
Abcd2	Q61285	-0.5	-0.62	-0.08	-0.65	-0.53	-0.4	-0.32	-0.3	-0.52	-0.15	-0.11	0.19	0.13	-0.67	-0.42	0	0.075	0.315	0.2225	0.708487	0.19589	0.392021	0.999971	1	0.871816
Abcd3	P55096	-0.17	-1.1	-0.77	-0.63	-0.91	-0.57	-0.74	-0.14	-0.64	0.04	-0.59	-0.63	-0.53	-0.6	-0.71	-0.39	0.0775	0.2125	0.11	0.77634	0.441824	0.64672	0.999971	1	0.933613
Abcd4	O89016	-1.31	-1.64	1.47	-0.45	-1.39	-1.67	1.15	1.67	-1.3	-1.42	1.75	0.7	-0.81	-1.3	0.83	0.06	0.4225	0.415	0.1775	0.669826	0.660531	0.8153	0.999971	1	0.974918
Abce1	P61222	0.86	1.08	1.48	1.38	1.04	1.1	1.13	1.57	1.21	1.09	1.22	1.07	0.88	1.22	1.47	1.51	0.01	-0.0525	0.07	0.964765	0.793502	0.768734	0.999971	1	0.962792
Abcf1	Q6P542	-0.05	1.37	0.49	0.54	1.37	1.27	0.39	0.59	1.33	0.63	0.5	0.9	1.23	1.06	0.99	0.94	0.3175	0.2525	0.4675	0.400925	0.4672	0.153483	0.999971	1	0.795578
Abcf2	Q99LE6	0.36	0.58	0.48	0.21	0.54	0.56	0.43	0.32	0.68	0.2	0.44	0.4	0.95	0.56	0.31	0.36	0.055	0.0225	0.1375	0.758254	0.905289	0.526366	0.999971	1	0.909459
Abcf3	Q8K268	-0.4	0.21	0.02	-0.34	0.31	-0.32	-0.08	-0.28	0.28	-0.51	0.33	0.14	0.07	-0.33	0.05	-0.12	0.035	0.1875	0.045	0.883287	0.482768	0.837049	0.999971	1	0.979416
Abcg1	Q64343	1.15	-0.56	-0.52	-0.41	-0.96	-0.54	0.39	-1.08	-1.14	0.29	-0.29	-0.8	-1.14	-1.52	-1.27	-0.96	-0.4625	-0.4	-1.1375	0.360257	0.417878	0.0204635	0.999971	1	0.635388
Abcg2	S4R2E1	-0.73	-0.44	-0.01	-0.38	-0.64	-0.69	-0.2	-0.39	-0.6	-0.62	0.18	-0.15	-0.65	-0.51	-0.31	-0.31	-0.09	0.0925	-0.055	0.692557	0.726056	0.799909	0.999971	1	0.970626
Abcg4	Q91WA9	3.13	-2.18	-1.67	-0.48	-1.73	-1.61	-0.91	-0.37	-1.73	2.38	-0.94	-0.65	-2.14	-0.39	-0.4	-0.53	-0.855	0.065	-0.565	0.44622	0.961289	0.620389	0.999971	1	0.929305
Abhd10	Q6PE15-2	-0.09	-0.24	0.13	0.03	-0.61	-0.62	-0.37	0.26	-0.47	-0.18	-0.31	-1.39	-0.65	-0.4	-0.24	-0.25	-0.2925	-0.545	-0.3425	0.259961	0.0919207	0.101297	0.999971	1	0.78268
Abhd11	Q8K4F5	-1.3	-1.4	-0.61	-1	-1.46	-1.61	-0.56	-0.57	-1.68	-1.84	-0.45	-0.5	-1.7	-1.65	-0.59	-0.83	0.0275	-0.04	-0.115	0.933875	0.919547	0.730792	0.999971	1	0.956041
Abhd12	Q99LR1	-0.76	-0.36	0.48	-0.09	-0.25	-0.46	0.73	0.16	-0.09	-0.69	0.28	-0.86	-0.36	-0.86	0.02	-0.22	0.2275	-0.1575	-0.1725	0.532579	0.665375	0.59521	0.999971	1	0.92377
Abhd14b	E9QN99	1.12	0.93	0.97	1.26	0.87	0.89	0.53	1.09	0.43	0.51	-0.21	0.57	0.15	0.88	0.86	0.54	-0.225	-0.745	-0.4625	0.274243	0.00997259	0.0681498	0.999971	1	0.733937
Abhd16a	Q9Z1Q2	-0.43	-0.6	-0.46	-0.43	-0.56	-0.52	-0.34	-0.37	-0.83	-0.58	-0.39	-0.28	-0.38	-0.51	-0.32	-0.08	0.0325	-0.04	0.1575	0.846289	0.832837	0.39166	0.999971	1	0.871816
Abhd17a	Q99JW1	1.55	-1.42	-0.78	-0.5	-1.19	-0.41	0.04	-0.66	-1.76	-0.23	-0.83	-1.34	-1.71	-1.72	-1.04	-1.05	-0.2675	-0.7525	-1.0925	0.671928	0.271999	0.101843	0.999971	1	0.78268
Abhd17b	Q7M759	-0.93	-0.81	-0.68	-1.61	-0.59	-0.71	-0.6	-0.91	-0.33	-0.82	-0.55	-0.23	-0.06	-0.84	-0.32	-1.54	0.305	0.525	0.3175	0.240178	0.0741647	0.407241	0.999971	1	0.874911
Abhd17c	Q8VCV1	-0.3	-0.68	-0.32	-0.13	-0.84	-1.02	-0.82	-0.23	-0.5	-0.35	-0.36	-0.41	-0.75	-0.95	0.07	0.36	-0.37	-0.0475	0.04	0.148944	0.798722	0.904901	0.999971	1	0.991091
Abhd3	Q91ZH7	-0.12	-0.57	-0.02	-0.05	-0.1	-0.01	0	0.73	-0.05	0.29	-0.18	-0.54	0.73	-0.12	0.29	0.04	0.345	0.07	0.425	0.201727	0.773714	0.120021	0.999971	1	0.78268
Abhd4	Q3U7M5	0.34	-0.27	0.36	0.41	-0.4	-0.33	-0.62	1.07	-0.05	0.47	0.19	0.4	-0.39	-0.12	0.72	0.54	-0.28	0.0425	-0.0225	0.488926	0.855031	0.942803	0.999971	1	0.99692
Abhd5	Q9DBL9	0.21	-0.83	-0.83	-1.13	-1.01	-0.88	-1.13	-0.37	-0.93	-0.38	-1.36	-0.91	-1.33	-0.97	-0.47	-0.66	-0.2025	-0.25	-0.2125	0.550337	0.48136	0.542176	0.999971	1	0.911119
Abhd6	Q8R2Y0-2	-2.46	-2.44	-1.65	-1.8	-2.32	-2.17	-1.38	-1.72	-2.29	-2.13	-1.41	-1.47	-2.9	-2.22	-1.59	-1.37	0.19	0.2625	0.0675	0.5408	0.410999	0.862266	0.999971	1	0.982963
Abi1	B7ZCU3	-2.12	-0.31	-1.45	-2.64	-0.28	-1.91	-0.51	-2.17	-0.45	-2.7	-0.67	-0.62	-0.8	-3.13	-1.97	-4.61	0.4125	0.52	-0.9975	0.519129	0.44447	0.264319	0.999971	1	0.842533
Abi1_1	B7ZCU4	0.39	-0.34	-0.02	-0.82	-0.48	-0.5	0.23	-0.64	-0.18	0.18	0.05	-0.1	0.06	-0.51	-0.54	-0.69	-0.15	0.185	-0.2225	0.644509	0.516369	0.479791	0.999971	1	0.894438
Abi2	A0A087WPP8	0.14	-0.28	-0.36	-0.4	-0.7	-0.43	0.21	-0.84	-0.62	-0.18	-0.36	-0.76	-0.69	-1.33	-0.78	-1.31	-0.215	-0.255	-0.8025	0.449544	0.26541	0.00876897	0.999971	1	0.610079
Abi2_1	A0A087WRS3	2.01	-4.6	-1.85	-1.11	-4.47	-4.74	0.39	-2.64	-3.98	-0.55	-3.84	-4.72	-9.03	-6.59	-3.46	-3.72	-1.4775	-1.885	-4.3125	0.366126	0.221765	0.0285465	0.999971	1	0.678474
Abi3	Q8BYZ1	0.33	1.5	1.1	1.13	1.14	1.2	0.52	1.12	1.21	0.81	1.32	1.41	1.27	0.9	1.07	1.68	-0.02	0.1725	0.215	0.946968	0.555898	0.487524	0.999971	1	0.897906
Abl1	P00520-2	1.47	-0.04	-0.16	-0.27	-0.15	0.13	0.12	-0.18	-0.09	0.69	-0.18	-0.07	-0.27	-0.27	-0.35	-0.31	-0.27	-0.1625	-0.55	0.504735	0.708245	0.186578	0.999971	1	0.809025
Abl2	F8VQH0	0.82	-0.37	0.08	-0.16	-0.43	-0.25	0.18	-0.19	-0.4	0.28	-0.06	-0.13	-0.17	-0.45	-0.21	-0.32	-0.265	-0.17	-0.38	0.385253	0.57664	0.201199	0.999971	1	0.815758
Ablim1	E9Q9C0	-0.27	-0.78	-0.65	-0.81	-0.84	-0.27	-0.43	-0.86	-0.76	-0.28	-0.91	-1.14	-0.38	-0.76	-0.68	-0.84	0.0275	-0.145	-0.0375	0.905104	0.561268	0.858845	0.999971	1	0.982702
Ablim2	Q8BL65	-0.82	-0.62	0.12	-0.43	-0.84	-0.72	-0.17	-0.44	-0.82	-1.17	-0.35	-0.84	-0.39	-1.43	-0.38	-0.21	-0.105	-0.3575	-0.165	0.699129	0.22045	0.631123	0.999971	1	0.932858
Ablim2_1	E9Q0W6	-1.89	-1.65	-1.62	-1.46	-1.86	-1.56	-2.43	-1.55	-1.85	-1.48	-1.85	-1.57	-1.28	-1.18	-1.22	-1.52	-0.195	-0.0325	0.355	0.446453	0.864997	0.0860345	0.999971	1	0.759991
Ablim2_2	Q8BL65-4	-1.94	1.15	-2.67	-3.45	0.02	0.31	-2.13	-0.67	-0.1	-1.78	0.13	-1.2	0.82	-0.92	-0.71	-1.67	1.11	0.99	1.1075	0.29364	0.333224	0.291568	0.999971	1	0.847402
Ablim3	Q69ZX8	-0.26	-0.5	-0.76	-0.76	-0.7	-0.24	-0.73	-0.03	-0.59	0.11	-0.93	-1.04	0.04	-0.67	-0.17	-0.67	0.145	-0.0425	0.2025	0.553458	0.885357	0.420939	0.999971	1	0.87788
Abr	A0A571BG95	1.84	-1.44	-0.34	-0.05	-1.23	-1.35	0.38	0.92	0.11	0.92	0.12	0.33	-2.13	-0.53	0.77	0.34	-0.3225	0.3675	-0.39	0.687717	0.573469	0.644554	0.999971	1	0.93301
Abr_1	Q5SSL4	-0.26	-0.08	-0.08	-0.28	-0.25	-0.03	0.16	-0.23	0.12	-0.19	-0.09	0.04	0.01	-0.23	-0.24	-0.21	0.0875	0.145	0.0075	0.637232	0.407032	0.965348	0.999971	1	0.998721
Abr_2	Q5SSL4-4	-0.49	-0.92	-1.13	-0.42	0.06	-1.96	-1.27	-0.39	-0.47	-1.44	-1.02	-0.28	-0.33	-0.59	-0.59	-1.57	-0.15	-0.0625	-0.03	0.740822	0.843764	0.926223	0.999971	1	0.99401
Abracl	A0A1W2P7X0	-1.11	2.66	0.88	0.2	2.46	1.2	0.26	0.35	2.26	-1.01	0.63	-0.36	3.37	0.99	0.73	-0.16	0.41	-0.2775	0.575	0.627483	0.771428	0.558609	0.999971	1	0.915051
Abraxas2	Z4YJY0	0.56	0.38	0.35	0.63	0.61	0.35	0.68	0.66	0.68	0.36	0.58	0.06	0.86	0.25	0.1	0.4	0.095	-0.06	-0.0775	0.601703	0.769071	0.727565	0.999971	1	0.956041
Abtb2	Q7TQI7	-0.01	-0.07	-0.3	-0.74	-0.09	-0.33	-0.63	-0.59	-0.01	-0.32	-0.65	-0.91	-0.06	-0.45	0.12	-0.49	-0.13	-0.1925	0.06	0.591729	0.487201	0.811365	0.999971	1	0.973864
Acaa1a	Q921H8	-0.39	-1.33	-0.79	-0.81	-1.08	-1.16	-0.94	-0.63	-1.18	-0.6	-0.74	-0.64	-0.83	-0.72	-0.47	-0.18	-0.1225	0.04	0.28	0.629358	0.876333	0.304189	0.999971	1	0.847402
Acaa2	Q8BWT1	-0.95	-0.62	-0.77	-0.74	-0.4	-1.06	-0.96	-0.47	-0.49	-1.01	-1.6	-0.96	-0.4	-0.93	-1.04	-0.85	0.0475	-0.245	-0.035	0.831525	0.357538	0.86688	0.999971	1	0.983462
Acaca	Q5SWU9	-0.51	-0.45	-0.34	-0.29	-0.47	-0.23	-0.48	-0.22	-0.28	-0.23	-0.14	-0.11	-0.16	-0.1	0.01	-0.03	0.0475	0.2075	0.3275	0.785937	0.223621	0.0762582	0.999971	1	0.748444
Acad11	A0A0R4J0I6	-0.05	-0.92	-1.03	-1.37	-0.98	-0.5	-0.82	-0.67	-0.57	0.44	-0.68	-0.66	-0.53	-0.42	-1.22	-0.92	0.1	0.475	0.07	0.744159	0.229863	0.834344	0.999971	1	0.979036
Acad12	D3Z7X0	-0.45	-0.58	-1.73	-1.7	-0.36	0.46	-1.82	-0.91	-0.47	-0.33	-1.95	-1.71	-0.57	0.07	-1.56	-0.97	0.4575	0	0.3575	0.410096	1	0.443296	0.999971	1	0.883386
Acad8	D3YTT4	-0.33	0.12	0.26	0.06	-0.4	0.05	0.1	0.54	-0.29	-0.17	-0.37	-0.17	-0.16	0.2	0.11	0.15	0.045	-0.2775	0.0475	0.860149	0.17707	0.817043	0.999971	1	0.974929
Acad9	Q8JZN5	-0.25	-0.46	-0.53	-0.4	-0.59	-0.44	-0.39	-0.27	-0.49	-0.41	-0.42	-0.38	-0.23	-0.61	-0.48	-0.31	-0.0125	-0.015	0.0025	0.943042	0.926484	0.989033	0.999971	1	0.99925
Acadl	A0A0R4J083	-1.1	-1.5	-1.49	-1.08	-1.39	-1.17	-1.22	-0.79	-1.35	-1.25	-1.51	-1.53	-1.63	-1.37	-1.63	-1.27	0.15	-0.1175	-0.1825	0.496813	0.547935	0.383453	0.999971	1	0.871816
Acadm	P45952	-0.86	-1.09	-1.02	-1.15	-0.87	-0.8	-1.13	-0.74	-0.63	-0.61	-0.96	-0.73	-0.73	-0.78	-0.93	-1.04	0.145	0.2975	0.16	0.434921	0.120295	0.380032	0.999971	1	0.871816
Acads	Q07417	-0.86	-1.11	-1.48	-1.64	-0.92	-1.28	-1.01	-1.2	-0.87	-1.3	-1.16	-1.04	-0.88	-1.55	-1.52	-1.63	0.17	0.18	-0.1225	0.470897	0.447141	0.649864	0.999971	1	0.933842
Acadsb	Q9DBL1	-1.05	-0.44	-0.47	-0.31	-0.41	-0.58	-0.59	0.04	-0.31	-0.84	-0.29	-0.37	-0.25	-0.29	-0.32	-0.19	0.1825	0.115	0.305	0.471005	0.63405	0.180495	0.999971	1	0.808532
Acadvl	P50544	-0.86	-0.57	-0.29	-0.55	-0.66	-0.7	-0.48	-0.28	-0.48	-0.84	-0.41	-0.32	-0.19	-0.78	-0.31	-0.2	0.0375	0.055	0.1975	0.854991	0.793395	0.38904	0.999971	1	0.871816
Acan	Q61282	1.12	0.66	0.38	0.65	0.63	0.61	-0.08	0.28	0.45	0.74	-0.3	0.08	0.66	0.42	0.37	0.21	-0.3425	-0.46	-0.2875	0.199388	0.133881	0.218725	0.999971	1	0.827064
Acap2	D4AFX6	0.46	0.33	-0.29	-0.19	-0.68	-1.06	-0.12	-0.6	0.41	0.11	-0.83	-0.65	0.59	-1	-0.33	0.04	-0.6925	-0.3175	-0.2525	0.0345075	0.370768	0.502473	0.999971	1	0.904573
Acap2_1	A0A338P6P6	-0.46	-0.57	-0.04	-0.34	-0.67	-0.32	-0.07	-0.25	-0.44	-0.4	0	0	-0.44	-0.48	-0.02	-0.21	0.025	0.1425	0.065	0.907907	0.507248	0.756406	0.999971	1	0.961116
Acap3	A2ADA6	0.35	0.35	0.3	0.29	0.49	0.49	0.44	0.29	0.41	0.53	0.26	-0.05	0.38	0.3	0.12	0.25	0.105	-0.035	-0.06	0.523671	0.853108	0.7173	0.999971	1	0.952711
Acat1	Q8QZT1	-0.74	-0.78	-0.69	-1.1	-0.72	-0.55	0.31	-0.75	-0.43	-0.79	-0.4	0.08	-0.72	-0.72	-0.68	-0.85	0.4	0.4425	0.085	0.179345	0.0861485	0.639198	0.999971	1	0.93301
Acat2	Q8CAY6	-0.44	-0.73	-0.77	-0.82	-0.62	-0.86	-0.52	-0.72	-0.64	-0.69	-0.83	-0.2	-0.24	-0.68	-0.29	-0.24	0.01	0.1	0.3275	0.956842	0.633365	0.124872	0.999971	1	0.78268
Acbd3	A0A0R4J079	0.35	0.73	1.16	1.17	0.74	0.21	0.56	1.28	0.67	0.35	1.32	1.19	0.34	0.6	1.18	1.47	-0.155	0.03	0.045	0.61301	0.92174	0.890311	0.999971	1	0.988102
Acbd5	A0A2I3BRB9	0.13	-1.24	-0.83	-0.87	-1.05	-0.96	-0.73	-0.42	-1	-0.36	-0.82	-0.81	-1.11	-0.91	-0.98	-0.94	-0.0875	-0.045	-0.2825	0.788092	0.889321	0.364589	0.999971	1	0.869526
Acbd6	Q9D061	0.04	0.7	0.2	-0.14	0.77	0.41	0.22	0.1	0.46	-0.14	0.5	0.08	0.41	0.45	0.24	0.2	0.175	0.025	0.125	0.50183	0.923138	0.589788	0.999971	1	0.922012
Ace	P09470	-0.43	0.87	0.92	-0.02	0.61	-0.14	0.8	-0.31	0.51	-0.75	-1.2	0.24	0.34	-0.29	0.26	-0.35	-0.095	-0.635	-0.345	0.817221	0.21704	0.362741	0.999971	1	0.869526
Ace2	Q8R0I0	0.57	-0.61	-1.17	-0.69	-0.47	-0.87	-0.6	-0.76	-0.98	0.53	-0.78	-0.92	-0.81	-0.75	-0.51	-0.61	-0.2	-0.0625	-0.195	0.590725	0.896683	0.597481	0.999971	1	0.92377
Ache	P21836	-0.23	-0.38	-1.37	-0.43	0.19	-0.86	-1.25	-0.59	0.07	-0.96	-1.39	-0.94	0.47	-0.51	-0.67	-1.09	-0.025	-0.2025	0.1525	0.948152	0.605511	0.705372	0.999971	1	0.950182
Acin1	Q9JIX8-4	1.64	-0.04	0.89	0.83	0.1	0.2	0.65	0.64	-0.07	0.71	0.34	0.53	-0.2	-0.08	0.81	1.13	-0.4325	-0.4525	-0.415	0.252954	0.243449	0.365638	0.999971	1	0.869526
Acly	Q91V92	1.38	-0.6	-0.84	0.06	-0.24	-0.76	0.95	-0.15	-0.82	0.49	-1.33	-1.92	-2.35	-0.35	-1.65	-1.53	-0.05	-0.895	-1.47	0.929156	0.194473	0.0330549	0.999971	1	0.685881
Acly_1	Q3V117	-0.19	-0.43	-0.38	-0.3	-0.2	-0.57	0.02	-0.39	-0.04	-0.38	-0.13	0.03	0.1	-0.42	-0.37	-0.47	0.04	0.195	0.035	0.839544	0.290153	0.86153	0.999971	1	0.982963
Aco1	P28271	-0.62	-0.43	-0.16	-0.41	-0.33	-0.59	-0.17	0.01	-0.25	-0.54	-0.01	0.15	-0.29	-0.47	0.02	-0.14	0.135	0.2425	0.185	0.524181	0.28492	0.367622	0.999971	1	0.869526
Aco2	Q99KI0	-0.62	-0.28	-0.51	-0.44	-0.54	-0.78	-0.66	-0.5	-0.72	-0.83	-0.68	-0.38	-0.17	-0.49	-0.59	-0.29	-0.1575	-0.19	0.0775	0.386044	0.320969	0.682844	0.999971	1	0.943421
Acot1	O55137	0	0.75	-2.79	-2.91	0.93	1.07	-2.65	-2.37	0.39	-0.12	-2.35	-3.13	0.31	1.02	-2.75	-2.77	0.4825	-0.065	0.19	0.696288	0.95448	0.876554	0.999971	1	0.985129
Acot11	Q8VHQ9	0.72	0.6	0.14	-0.05	0.41	0.51	0.79	-0.16	0.02	-0.17	-0.07	-0.47	1.01	0.1	-0.22	-0.12	0.035	-0.525	-0.16	0.902086	0.0544204	0.634194	0.999971	1	0.93301
Acot13	Q9CQR4	0.49	-0.31	-3.15	-2.84	-0.66	-0.87	-0.81	-3.63	-1.03	-0.41	-3.42	-3.69	-1.35	-0.58	-3.62	-4.06	-0.04	-0.685	-0.95	0.968971	0.539322	0.401663	0.999971	1	0.871816
Acot2	Q9QYR9	-0.96	-0.53	-0.32	-0.64	-0.54	-0.59	-0.6	-0.14	-0.82	-0.96	-0.62	-0.43	-0.72	-0.49	-0.42	-0.31	0.145	-0.095	0.1275	0.511538	0.66499	0.548997	0.999971	1	0.911727
Acot7	Q91V12-2	0.3	-0.06	0.51	0.15	-0.42	0.37	0.81	0.37	-0.15	0.02	0.59	-0.63	-0.58	0.45	0.07	0.11	0.0575	-0.2675	-0.2125	0.84473	0.368207	0.435723	0.999971	1	0.882419
Acot8	P58137	-0.45	0.13	-0.34	0.06	-0.13	0.36	-0.93	0.35	0.28	-0.01	-0.37	-0.46	0.18	0.62	-0.09	0.41	0.0625	0.01	0.43	0.851489	0.967959	0.103305	0.999971	1	0.78268
Acot9	Q9R0X4	-0.53	-0.47	-0.96	-1.28	-0.29	-0.52	-0.3	-0.99	-0.13	-0.87	-0.77	-0.83	-0.3	-0.66	-1.09	-1.14	0.285	0.16	0.0125	0.307897	0.564079	0.965372	0.999971	1	0.998721
Acox1	Q9R0H0-2	-1.2	-1.41	-0.89	-1	-1.48	-1.16	-0.91	0.26	-0.97	-0.98	-0.41	-0.17	-0.45	-0.9	-0.16	-0.01	0.3025	0.4925	0.745	0.436706	0.0822379	0.0157818	0.999971	1	0.613095
Acox3	Q9EPL9	-0.49	0.06	-0.79	-0.59	0.04	0.04	-0.95	-0.13	-0.37	-0.51	-0.45	-0.98	0.49	-0.19	-0.47	-0.23	0.2025	-0.125	0.3525	0.512405	0.622923	0.241503	0.999971	1	0.835635
Acp1	Q561M1	-2.4	-0.49	0.28	-0.74	1.15	-1.04	2.77	0.17	1.44	-2.77	0.58	1.44	1.94	-0.8	-0.37	-1.07	1.6	1.01	0.7625	0.0965462	0.34191	0.353513	0.999971	1	0.868675
Acp1_1	Q9D358	0.98	-0.17	-0.54	-1.31	0.21	0.04	-0.6	-1.03	-0.14	0.43	-0.62	-0.56	-0.24	-0.01	-0.69	-0.86	-0.085	0.0375	-0.19	0.868724	0.939974	0.693984	0.999971	1	0.947174
Acp2	A0A5F8MPS7	-0.04	0.38	0.64	0.8	0.09	0.3	0.4	0.83	0.36	0.51	0.69	0.74	0.33	0.51	0.44	1.11	-0.04	0.13	0.1525	0.879002	0.584032	0.579157	0.999971	1	0.919302
Acp6	Q8BP40	0.02	0.22	0.14	0.29	0.25	0.01	-0.08	-0.14	0	0.28	0.17	0.59	-0.41	0.23	-0.04	-0.18	-0.1575	0.0925	-0.2675	0.394885	0.636851	0.209856	0.999971	1	0.82263
Acsbg1	Q99PU5	-1.5	-1.38	-1.48	-1.36	-1.59	-1.29	-1.62	-0.89	-1.33	-1.35	-1.37	-1.24	-1.32	-1.17	-1.44	-1.11	0.0825	0.1075	0.17	0.706499	0.501357	0.340178	0.999971	1	0.860511
Acsf2	Q8VCW8	-0.11	-0.01	-0.75	-0.86	0.27	-0.03	-0.81	-0.75	0.63	-0.2	-0.77	-1.07	1.42	-0.16	-1.08	-1.19	0.1025	0.08	0.18	0.763885	0.846293	0.759635	0.999971	1	0.961116
Acsf3	Q3URE1	-0.17	-0.44	-0.4	-0.77	-0.6	-0.5	-0.32	-0.48	-0.54	-0.18	-0.05	0.07	-0.14	-0.54	-0.46	-0.58	-0.03	0.27	0.015	0.879054	0.241802	0.943114	0.999971	1	0.99692
Acsl1	D3Z041	-0.05	0.31	0.36	0.34	0.27	0.3	0.12	0.35	0.33	0.15	0.4	0.46	0.43	0.14	0.48	0.39	0.02	0.095	0.12	0.913201	0.609907	0.534526	0.999971	1	0.910077
Acsl3	Q9CZW4	-1.34	-1.17	-0.54	-0.55	-1.29	-1.28	-0.79	-0.08	-1.13	-0.95	-0.09	-0.59	-0.93	-1.15	-0.22	-0.31	0.04	0.21	0.2475	0.908226	0.508179	0.439014	0.999971	1	0.883105
Acsl4	Q9QUJ7-2	-1.52	0.07	0.44	-0.4	0.22	-0.21	0.45	-0.1	0.69	-1.13	0.7	0.18	0.59	-0.63	0.16	-0.36	0.4425	0.4625	0.2925	0.315151	0.417344	0.539937	0.999971	1	0.910077
Acsl5	Q8JZR0	-0.76	0.12	-0.21	-0.36	-0.33	-0.13	-0.34	-0.79	-0.36	-0.83	-0.24	-0.3	0.34	-0.08	-0.25	-0.4	-0.095	-0.13	0.205	0.710677	0.608372	0.446982	0.999971	1	0.884581
Acsl6	Q5ICG5	2.31	-0.37	0.26	0.27	-0.36	0.37	1.02	-0.25	0.14	1.33	-0.94	-0.38	-0.22	-0.09	0.4	-0.28	-0.4225	-0.58	-0.665	0.491902	0.410813	0.250712	0.999971	1	0.839012
Acsl6_1	Q91WC3	-0.83	-0.64	-0.44	-0.5	-0.96	-0.51	-0.67	-0.15	-0.86	-0.62	-0.42	-0.48	-0.54	-0.49	-0.33	-0.04	0.03	0.0075	0.2525	0.895546	0.968693	0.229777	0.999971	1	0.828687
Acss1	Q99NB1	-1.1	-0.72	-0.98	-1.66	-0.71	-0.59	-0.99	-0.53	-0.57	-1.13	-1.26	-1.05	-0.64	-0.77	-1.21	-1.62	0.41	0.1125	0.055	0.128607	0.675579	0.857241	0.999971	1	0.98269
Acss2	A2AQN4	-0.76	0.75	0.68	0.07	0.44	1	0.41	0.19	0.88	0.01	0.75	0.95	1.28	0.9	0.57	0.83	0.325	0.4625	0.71	0.399122	0.261364	0.0817248	0.999971	1	0.755254
Actb	P60710	-0.77	-0.8	-1.36	-1.02	-0.72	-0.98	-0.98	-1.07	-0.84	-0.99	-0.91	-1.29	-0.6	-0.99	-1.01	-0.83	0.05	-0.02	0.13	0.810037	0.92514	0.548685	0.999971	1	0.911727
Actbl2	Q8BFZ3	-1.16	-0.13	-0.6	-1.05	1.75	-1.02	3.95	-1.28	4.35	-0.43	1.19	2.65	3.93	-1.56	-0.97	-0.57	1.585	2.675	0.9425	0.182402	0.0187764	0.417801	0.999971	1	0.877584
Actc1	P68033	-0.61	-1.35	-1.66	-0.82	0.2	-0.97	-1.44	-1.2	-0.9	-0.12	0.7	1.69	-1.51	-0.67	-1.27	-0.98	0.2575	1.4525	0.0025	0.538722	0.0274285	0.993519	0.999971	1	0.99933
Actg1	P63260	-0.19	-0.6	-1.14	-0.64	-1.01	-0.69	-1.37	-0.61	-0.81	-0.75	-1.25	-0.85	-1.03	-0.38	-0.82	-0.86	-0.2775	-0.2725	-0.13	0.330567	0.293785	0.622444	0.999971	1	0.929759
Actl6a	Q9Z2N8	0.82	1.05	0.92	0.76	0.96	0.33	0.05	0.62	0.61	0.87	0.22	0.39	0.71	1.02	0.78	0.93	-0.3975	-0.365	-0.0275	0.122724	0.101983	0.877254	0.999971	1	0.985139
Actl6b	Q99MR0	1.53	1.26	1.01	1.37	1.15	1.12	0.46	1.22	1.03	1.55	0.77	0.78	0.83	1.16	0.94	1.14	-0.305	-0.26	-0.275	0.225971	0.29926	0.187129	0.999971	1	0.809025
Actn1	A1BN54	-0.64	-0.63	-0.69	-0.49	-0.48	-0.86	-0.72	-0.8	-0.77	-0.65	-0.51	-0.34	-0.46	-0.87	-0.69	-0.56	-0.1025	0.045	-0.0325	0.566158	0.799733	0.856423	0.999971	1	0.98255
Actn1_1	Q7TPR4	0.07	1.8	2.15	0.08	1.99	1.58	4.55	0.98	2.25	0.5	2.85	4.32	4.64	1.3	1.25	1.75	1.25	1.455	1.21	0.171553	0.122269	0.192548	0.999971	1	0.810547
Actn2	Q9JI91	-1.2	-1.11	-2.24	-1.97	-0.99	-1.74	-1.98	-1.65	-1.13	-1.42	-1.68	-1.55	-0.88	-1.25	-1.73	-2.04	0.04	0.185	0.155	0.907931	0.553411	0.676394	0.999971	1	0.941944
Actn4	A0A1L1SV25	-1.1	-0.94	-1.18	-0.83	-0.42	-0.78	-1.11	-1.11	-0.7	-0.74	-0.77	-0.74	-0.61	-0.95	-1.01	-0.67	0.1575	0.275	0.2025	0.488089	0.129004	0.309483	0.999971	1	0.847402
Actn4_1	A0A1L1SVJ6	-5.98	-6.19	-5.25	-5.14	-4.3	-6.61	-4.52	-5.44	-4.45	-7.53	-4.95	-5.39	-4.98	-6.1	-5.33	-7.07	0.4225	0.06	-0.23	0.442307	0.927827	0.643967	0.999971	1	0.93301
Actn4_2	E9Q2W9	0.13	-1.33	-0.92	-1.12	-1.41	-1.12	-1.22	-1.32	-1.35	-0.47	-1.14	-1.28	-1.27	-1.83	-1.16	-0.37	-0.4575	-0.25	-0.3475	0.188973	0.506194	0.417739	0.999971	1	0.877584
Actr10	Q9QZB7	-0.72	0.05	0.19	-0.09	0.09	0.3	0.22	0.24	0.27	-0.27	0.51	0.48	0.59	0.26	0.37	0.21	0.355	0.39	0.5	0.162537	0.192146	0.0697377	0.999971	1	0.733937
Actr1a	P61164	-0.33	-1.35	-0.64	-0.65	-1.35	-1.03	-0.46	-0.63	-1.31	-0.57	-0.73	-1.1	-1.23	-0.95	-0.73	-0.53	-0.125	-0.185	-0.1175	0.680362	0.522947	0.675494	0.999971	1	0.941576
Actr1b	Q8R5C5	-1.45	-1.07	-0.76	-0.66	-0.89	-1.1	-0.7	-0.6	-1	-1.49	-0.67	-0.74	-0.39	-0.88	-0.39	-0.52	0.1625	0.01	0.44	0.506375	0.970819	0.0986413	0.999971	1	0.78268
Actr2	P61161	-0.14	0.22	-0.26	-0.09	0.4	0.28	-0.5	-0.18	0.17	0.08	0.05	-0.11	0.55	0.01	-0.21	-0.06	0.0675	0.115	0.14	0.792972	0.537946	0.551068	0.999971	1	0.913169
Actr3	Q99JY9	-0.52	-0.52	-1.03	-1.13	-0.46	-0.43	-0.84	-1.12	-0.54	-0.68	-1.2	-1.41	-0.62	-0.57	-1.15	-1.18	0.0875	-0.1575	-0.08	0.733849	0.574934	0.756448	0.999971	1	0.961116
Actr3b	Q641P0	-0.52	-0.32	-0.36	-0.51	-0.43	-0.19	-0.33	-0.5	-0.73	-0.77	-0.66	-0.78	-0.87	-0.58	-0.62	-0.65	0.065	-0.3075	-0.2525	0.708641	0.0832706	0.170214	0.999971	1	0.802549
Actr6	A0A0R4J009	-0.9	0.57	0.3	0.06	0.61	0.53	0.68	0.37	0.76	-0.66	1.03	1.16	-0.36	0.08	2.25	0.9	0.54	0.565	0.71	0.125623	0.26959	0.256271	0.999971	1	0.839012
Acvr1	P37172	-0.38	0.22	0.51	0.64	0.04	0.19	-0.12	1.09	0.2	-0.16	0.49	-1.51	0.52	0.2	0.86	1.05	0.0525	-0.4925	0.41	0.879918	0.307134	0.19889	0.999971	1	0.813335
Acvr1b	Q61271	-0.56	0.27	-0.44	-0.43	-0.16	-0.02	-0.77	0	0.34	-0.16	-0.48	-0.9	0.64	0.19	0.14	-0.3	0.0525	-0.01	0.4575	0.850191	0.975321	0.134221	0.999971	1	0.784948
Acvr1c	Q8K348	-0.39	-0.14	-0.04	0.07	-0.12	-0.93	-1.11	0.32	-1.46	-0.78	-0.49	-1.17	-0.57	-0.44	0.38	0.14	-0.335	-0.85	0.0025	0.346566	0.00895557	0.992571	0.999971	1	0.99925
Acvr2a	P27038	-1.62	-0.28	-0.49	-0.16	-0.09	-0.45	-0.71	-0.17	0.12	-1.78	-0.57	-0.55	0.31	-0.67	-0.3	0.1	0.2825	-0.0575	0.4975	0.435217	0.905445	0.218178	0.999971	1	0.827064
Acy1	A0A0R4J050	1.06	0.6	0.35	0.65	0.37	0.58	-0.11	0.75	0.49	1.15	0.21	0.15	0.44	0.69	0.5	0.39	-0.2675	-0.165	-0.16	0.319367	0.565962	0.45725	0.999971	1	0.88762
Acy3	Q91XE4	0.27	1.18	1.69	1.46	0.69	0.44	1.3	1.79	0.46	0.29	1.19	0.99	-0.01	0.58	1.31	1.17	-0.095	-0.4175	-0.3875	0.818497	0.27417	0.361039	0.999971	1	0.869526
Acyp1	P56376	-0.56	0.56	1.85	1.19	0.2	0.66	2.15	0.73	0.16	-0.46	1.03	0.3	0	0.42	0.51	0.3	0.175	-0.5025	-0.4525	0.772838	0.374149	0.366568	0.999971	1	0.869526
Acyp2	P56375	1.14	0.6	0.96	1.11	0.05	0.79	1.47	0.02	0.72	0.78	0.46	0.41	-0.45	0.14	0.64	-0.14	-0.37	-0.36	-0.905	0.317028	0.106216	0.00968635	0.999971	1	0.613095
Ada	P03958	-1.27	0.02	1.01	1.61	0.31	-0.4	0.42	1.27	0.54	-1.35	0.63	1.32	-0.34	0.23	1.83	1.53	0.0575	-0.0575	0.47	0.929478	0.940493	0.528127	0.999971	1	0.909725
Adal	Q80SY6	1.32	0.14	0.47	0.2	0.16	0.29	0.11	0.52	0.15	0.54	0.32	0.65	-0.08	0.26	0.43	0.24	-0.2625	-0.1175	-0.32	0.387125	0.697759	0.303835	0.999971	1	0.847402
Adam10	O35598	-0.25	-0.53	-0.45	-0.45	-0.25	-0.45	-0.2	-0.14	-0.29	-0.34	-0.31	0.17	-0.06	-0.3	0.29	-0.62	0.16	0.2275	0.2475	0.373347	0.259354	0.311128	0.999971	1	0.847973
Adam11	Q7TQG7	0.32	-0.68	-0.92	-0.81	-0.88	-0.3	-0.87	-0.63	-0.95	-0.25	-1.11	-1.23	-1.04	-0.9	-0.84	-0.67	-0.1475	-0.3625	-0.34	0.645204	0.319648	0.279936	0.999971	1	0.843812
Adam15	O88839-2	0.43	-0.55	-1.16	-0.73	-0.5	0.07	-0.87	0.2	-0.24	0.4	-1.04	-1.34	-0.15	0.16	-0.81	-0.47	0.2275	-0.0525	0.185	0.573245	0.913598	0.630608	0.999971	1	0.932711
Adam17	Q9Z0F8	-0.38	-0.08	0.56	-0.13	-0.14	0.2	0.53	-0.21	-0.16	-0.38	0.27	-2.38	-0.11	-0.23	0.31	-0.58	0.1025	-0.655	-0.145	0.71404	0.270946	0.614461	0.999971	1	0.927646
Adam22	Q9R1V6-14	-0.52	-0.81	-0.61	-0.61	-1.01	-0.47	-0.39	-0.49	-0.88	-0.6	-0.74	-0.86	-0.58	-0.44	-0.48	-0.52	0.0475	-0.1325	0.1325	0.818691	0.4481	0.439861	0.999971	1	0.883105
Adam23	Q9R1V7-2	-0.79	-1.29	-0.55	-0.71	-1.47	-1.22	-0.6	-0.77	-1.69	-1.43	-1.02	-1.17	-1.7	-1.39	-0.89	-0.87	-0.18	-0.4925	-0.3775	0.516281	0.0711467	0.194167	0.999971	1	0.810645
Adam9	Q61072	-0.83	-0.07	-0.04	0.35	-0.15	0.48	-0.39	0.8	0.18	-0.55	0.23	0.45	0.61	0.08	0.47	0.31	0.3325	0.225	0.515	0.368446	0.499141	0.0990165	0.999971	1	0.78268
Adap1	E9PY16	-1.01	-0.15	-1.18	-1.08	-0.06	-0.21	-0.89	-0.89	-0.07	-0.6	-0.7	-1.02	0.08	-0.26	-1.07	-0.75	0.3425	0.2575	0.355	0.307152	0.419596	0.318221	0.999971	1	0.853893
Adar	Q99MU3-5	0.44	1.45	1	0.87	1.27	0.54	1.27	0.25	1.3	0.54	0.82	0.94	0.73	0.6	0.48	0.03	-0.1075	-0.04	-0.48	0.746157	0.884843	0.108888	0.999971	1	0.78268
Adarb1	Q91ZS8-4	0.44	0.95	0.34	0.14	0.81	0.61	0.1	0.35	0.44	0.61	0.05	0.16	0.32	0.46	-0.04	0.42	-1.96262e-16	-0.1525	-0.1775	1	0.535747	0.467203	1	1	0.891731
Adat2	Q6P6J0	1.02	1.09	0.53	0.76	1.09	0.9	0.11	0.44	0.53	0.96	0.7	0.58	0.5	0.83	0.43	0.91	-0.215	-0.1575	-0.1825	0.44083	0.456606	0.416025	0.999971	1	0.876885
Adat3	Q6PAT0	3.11	4.15	3.34	1.17	4.49	1.17	5.66	2.32	5.74	1.04	5.06	5.44	13.99	0.03	2.31	0.69	0.4675	1.3775	1.3125	0.66288	0.246745	0.658417	0.999971	1	0.934638
Adck1	Q9D0L4	0.13	0.14	-0.11	-0.13	0.05	0.36	0.36	0.48	0.23	0.26	0.1	-0.38	0.54	0.6	0.2	0.44	0.305	0.045	0.4375	0.130929	0.831469	0.0412936	0.999971	1	0.700838
Adck2	E9QL72	1.78	1.51	1.95	2.49	1.16	1.83	1.19	3.09	1.37	1.96	2.48	1.43	0.9	1.57	1.85	2.05	-0.115	-0.1225	-0.34	0.804506	0.712122	0.312851	0.999971	1	0.849367
Adck5	E9PUK2	-0.99	0.21	-0.42	-0.44	0.11	-0.4	-0.71	-0.65	-0.21	-1.45	-0.98	-0.42	-0.21	0.39	-0.61	0.06	-0.0025	-0.355	0.3175	0.993612	0.342443	0.342738	0.999971	1	0.861474
Adcy1	O88444	-0.52	-0.03	0.07	-0.02	-0.41	0.14	-0.48	0.06	-0.47	-0.14	-0.27	-0.67	-0.04	-0.15	-0.42	-0.21	-0.0475	-0.2625	-0.08	0.843264	0.249217	0.702242	0.999971	1	0.949019
Adcy2	Q3V1Q3	-0.71	-0.75	-0.77	-0.99	-0.51	-0.4	-0.53	-0.87	-0.7	-0.69	-0.81	-1.58	-0.25	-0.56	-1.22	-0.77	0.2275	-0.14	0.105	0.247202	0.577033	0.669186	0.999971	1	0.938711
Adcy3	B8JK56	0.27	-0.27	-0.34	-0.12	-0.13	-0.06	-0.27	-0.17	-0.25	0.18	0.18	0.3	0.41	-0.42	-0.32	-0.15	-0.0425	0.2175	-0.005	0.832452	0.340343	0.984408	0.999971	1	0.99925
Adcy5	P84309	-0.7	-1.46	-2.5	-1.82	-0.97	-2.71	-1.7	-1.71	-0.8	-1	-2.18	-2.01	-1.04	-1.37	-1.78	-2.62	-0.1525	0.1225	-0.0825	0.75221	0.798537	0.861751	0.999971	1	0.982963
Adcy6	A0A2I3BRC5	-1.2	-2.01	-1.94	-1.73	-1.61	-1.68	-1.7	-1.83	-1.93	-1.55	-1.44	-1.38	-1.68	-1.56	-1.89	-1.43	0.015	0.145	0.08	0.947515	0.562152	0.740505	0.999971	1	0.960899
Adcy8	A0A2I3BQ46	-0.28	-0.9	-0.32	-1.01	-0.92	-0.76	-0.78	-0.85	-0.84	-0.5	0.11	-0.5	-0.28	-0.5	-0.7	-0.31	-0.2	0.195	0.18	0.39762	0.502037	0.469792	0.999971	1	0.892481
Adcy9	P51830	-0.63	-0.86	-0.35	-0.53	-0.88	-0.86	-0.53	-0.7	-1.13	-0.8	-0.74	-0.8	-1.04	-1.22	-1.03	-0.81	-0.15	-0.275	-0.4325	0.451498	0.183823	0.0525712	0.999971	1	0.724862
Adcyap1	O70176	0.09	0.24	-0.16	-0.46	-0.08	-0.35	-0.76	-0.24	2.14	-0.73	-1.44	0.62	1.6	1.22	0.92	0.11	-0.285	0.22	1.035	0.258896	0.763759	0.0147194	0.999971	1	0.613095
Adcyap1r1	E9Q968	-1.41	-0.96	-1.01	-1.12	-0.92	-0.9	-1.07	-1.1	-1.28	-1.43	-0.97	-1.32	-1.01	-0.67	-0.92	-0.57	0.1275	-0.125	0.3325	0.497448	0.530329	0.126829	0.999971	1	0.783193
Adcyap1r1_1	E9Q3E8	-1.11	0.84	-2.29	-2.34	0.17	2.5	-2	-1.82	-0.97	0.33	-2.97	-1.74	0.57	1.32	-2.11	-2.58	0.9375	-0.1125	0.525	0.422402	0.902182	0.63177	0.999971	1	0.932858
Add1	E9Q1K3	-0.24	-1.04	-0.47	-0.46	-1.49	-0.33	-0.8	0.33	-1.41	-0.2	-1.49	-0.87	-1.1	-0.19	-0.54	-0.76	-0.02	-0.44	-0.095	0.960205	0.217765	0.730245	0.999971	1	0.956041
Add1_1	F8WGR0	-0.21	-1.06	-1.4	-1.17	-1.12	-0.83	-1.3	-1.2	-1.16	-0.6	-1.47	-1.54	-1.16	-1.02	-1.38	-1.29	-0.1525	-0.2325	-0.2525	0.602342	0.493284	0.387653	0.999971	1	0.871816
Add1_2	Q9QYC0	-0.4	2.64	1.93	0.47	1.52	3.62	0.19	1.07	1.95	0.87	0.14	0.88	2.47	1.79	0.72	1.44	0.44	-0.2	0.445	0.625862	0.779148	0.532793	0.999971	1	0.910069
Add2	Q9QYB8	-0.08	-0.14	-0.53	-0.77	-0.21	0.02	-0.53	-0.72	-0.24	-0.02	-0.5	-0.51	0.3	-0.1	-0.83	-0.51	0.02	0.0625	0.095	0.937933	0.789995	0.75471	0.999971	1	0.961116
Add3	Q9QYB5-2	0.59	-0.59	-0.41	-0.15	-0.67	-0.92	-0.55	-0.49	-0.64	0.54	-0.52	-0.31	-0.37	-1.05	-0.75	0.19	-0.5175	-0.0925	-0.355	0.100343	0.799083	0.342805	0.999971	1	0.861474
Add3_1	Q9QYB5	-0.51	-2.05	-0.1	-1.05	-1.85	-2	-0.39	-0.69	-2.36	-0.81	-0.03	0.97	-2.43	-1.78	-0.94	1.42	-0.305	0.37	-0.005	0.574556	0.621243	0.995276	0.999971	1	1
Adgb	D3YZ77	-0.82	-2.31	-1.97	-0.9	-1.65	-1.31	-0.34	-0.87	-1.92	-0.38	-0.51	0.18	-2.48	-1.47	-1.47	-0.12	0.4575	0.8425	0.115	0.317007	0.145741	0.838282	0.999971	1	0.979626
Adgra1	Q8C4G9	0.16	-1.17	-1.23	-0.63	-1.26	-0.46	-0.25	-0.68	-1.27	-0.21	-1.18	-2.06	-0.74	-0.45	-1.05	-0.67	0.055	-0.4625	-0.01	0.88363	0.336041	0.97665	0.999971	1	0.99925
Adgra2	J3QMG7	3.76	1.21	1.82	1.32	0.64	3.33	3.91	0.45	0.06	4.32	5.78	-1.64	-1.31	3.86	-0.11	0.6	0.055	0.1025	-1.2675	0.954248	0.950314	0.275143	0.999971	1	0.843794
Adgrb1	Q3UHD1	-0.42	-1.23	-0.95	-1.29	-1.33	-0.94	-0.97	-1.21	-1.3	-0.65	-0.6	-0.83	-0.74	-1.26	-1.11	-0.89	-0.14	0.1275	-0.0275	0.576496	0.640966	0.914331	0.999971	1	0.992633
Adgrb2	H7BX74	0.19	-0.36	-0.16	-0.23	-0.59	-0.09	0	0.21	-0.76	0.07	-0.4	-0.54	0.05	-0.48	-0.34	-0.12	0.0225	-0.2675	-0.0825	0.925065	0.284449	0.701681	0.999971	1	0.949019
Adgrb3	Q80ZF8	-0.1	-0.53	-0.74	-0.53	-0.43	-0.44	-0.46	-0.76	-0.31	-0.29	-0.55	-0.63	0.09	-0.82	-1.03	-0.72	-0.0475	0.03	-0.145	0.819574	0.885013	0.621618	0.999971	1	0.929641
Adgre1	Q61549	3.25	2.24	2.22	3.24	3.04	2.01	3.29	2.39	3.52	3.16	2.24	1.82	1.81	0.59	1.22	-1.3	-0.055	-0.0525	-2.1575	0.88976	0.909467	0.009948	0.999971	1	0.613095
Adgrf5	G5E8Q8	-0.83	-0.33	1.92	0.99	0.61	-0.48	0.28	0.68	0.13	-0.57	0.58	0.84	0.29	0.15	0.69	2.34	-0.165	-0.1925	0.43	0.789982	0.76334	0.557724	0.999971	1	0.915051
Adgrg1	Q8K209	0.07	-0.61	-1.38	-0.58	-0.63	-1.15	-1.54	-1.17	-0.82	-0.12	-1.07	-1.04	-0.51	-0.65	-0.55	-0.59	-0.4975	-0.1375	0.05	0.174585	0.704683	0.869981	0.999971	1	0.983917
Adgrl1	H7BX15	-6.18	-2.26	-1.39	-2.21	-2.17	-1.29	-0.45	-3.09	-1.01	-4.33	-1.54	-2.22	-3.08	-3.59	-2.78	-4.75	1.26	0.735	-0.54	0.263344	0.532604	0.604725	0.999971	1	0.924454
Adgrl1_1	E9Q3V9	-0.8	-1	-0.97	-0.78	-0.94	-1.07	-0.92	-0.78	-0.84	-0.89	-0.92	-0.65	-0.71	-1.13	-0.85	-0.62	-0.04	0.0625	0.06	0.816712	0.712889	0.755112	0.999971	1	0.961116
Adgrl2	A0A0G2JFV3	-0.97	-1.2	-1.16	-1.29	-0.83	-0.99	-0.9	-1.18	-0.88	-1.16	-1.03	-1	-0.64	-1.17	-1.15	-1.03	0.18	0.1375	0.1575	0.331863	0.431353	0.439231	0.999971	1	0.883105
Adgrl3	D3YTW7	-0.05	-0.84	-1.05	-0.83	-0.7	-0.56	-0.67	-0.9	-0.5	-0.37	-0.89	-0.72	-0.2	-0.75	-0.73	-0.8	-0.015	0.0725	0.0725	0.953288	0.786491	0.794667	0.999971	1	0.970337
Adgrl3_1	D3Z6H9	-0.41	-0.34	-1.64	0.2	-0.57	0.07	-2.07	0.17	-0.64	0.46	-2.05	-1.73	0.15	-0.98	-2.02	0.72	-0.0525	-0.4425	0.015	0.929106	0.48966	0.981751	0.999971	1	0.99925
Adh5	P28474	0.41	-0.15	1.13	1.32	-0.27	0.31	1.13	1.51	-0.11	0.41	0.81	-0.18	-0.92	0.38	0.95	0.85	-0.0075	-0.445	-0.3625	0.987718	0.277828	0.481593	0.999971	1	0.89485
Adhfe1	A0A087WRE7	-1.37	-1.2	-0.86	-0.94	-2.14	-1.65	-0.67	-1.13	-1.96	-1.71	-1.19	-0.95	-1.43	-2.37	-1.23	-1.33	-0.305	-0.36	-0.4975	0.376514	0.213884	0.122277	0.999971	1	0.78268
Adi1	Q99JT9	0.54	0.74	0.86	0.65	0.19	0.19	0.04	0.35	1.15	0.8	1.07	0.73	0.8	1	1.35	1.01	-0.505	0.24	0.3425	0.0176967	0.221139	0.107729	0.999971	1	0.78268
Adipoq	Q60994	0.01	-0.48	-1.24	2.5	4.46	1.99	0.95	2.04	0.33	1.49	1.52	2.55	-0.88	-0.17	0.29	0.49	2.1625	1.275	-0.265	0.0516418	0.154573	0.734414	0.999971	1	0.957849
Adipor1	Q91VH1	-1	-0.44	-0.03	-0.15	-0.42	-0.35	-0.22	0	-0.29	-0.63	-0.51	0.88	-0.37	-0.17	-0.54	0.19	0.1575	0.2675	0.1825	0.547317	0.501693	0.523305	0.999971	1	0.907797
Adk	P55264-2	0.82	1.01	0.33	0.49	0.88	0.7	0.82	0.61	0.99	0.58	0.33	0.38	0.57	0.18	0.1	0.45	0.09	-0.0925	-0.3375	0.675139	0.705352	0.166332	0.999971	1	0.800215
Adnp	Q9Z103	0.61	0.31	0.88	0.61	0.62	0.23	1.18	0.57	0.3	0.47	0.47	1.16	0.54	0.41	0.69	0.56	0.0475	-0.0025	-0.0525	0.851959	0.991999	0.787364	0.999971	1	0.96724
Ado	Q6PDY2	-0.26	0.4	0.27	0.3	0.13	0.37	0.14	0.19	0.2	0.33	0.35	0.21	0.48	0.53	0.5	0.52	0.03	0.095	0.33	0.886106	0.6436	0.133536	0.999971	1	0.784948
Adora1	Q60612	1.56	0.6	1.41	0.9	0.3	0.9	1.79	-0.48	0.36	0.08	0.08	0.03	0.12	-1.22	-0.19	-1.09	-0.49	-0.98	-1.7125	0.332561	0.00419844	0.00166293	0.999971	0.969702	0.473622
Adora2a	Q60613	1.92	-1.09	-1.57	-0.62	-1.99	-3.48	-1.01	-0.6	-1.5	-0.48	-1.41	-2.05	-1.21	-1.84	-0.67	-1.87	-1.43	-1.02	-1.0575	0.139192	0.205258	0.181879	0.999971	1	0.808532
Adpgk	Q3UDS7	-0.92	0.11	0.37	0.42	0.26	0.17	0.29	0.76	0.08	0.18	0.4	0.8	0.46	0.55	0.76	1	0.375	0.37	0.6975	0.282786	0.301167	0.062332	0.999971	1	0.725348
Adprh	P54923	-0.38	0.66	0.81	0.6	0.97	0.56	1.14	1.14	1.24	0	1.25	1.07	0.74	0.45	0.89	0.81	0.53	0.4675	0.3	0.113681	0.249707	0.327866	0.999971	1	0.856472
Adprm	Q99KS6-2	-1.32	-0.81	-0.68	-0.87	-0.64	-1.16	-0.4	-0.3	-0.74	-1.75	-1.2	-1.81	-2.54	0.09	-0.42	-1.35	0.295	-0.455	-0.135	0.275094	0.151396	0.805325	0.999971	1	0.971701
Adprs	Q8CG72	1.05	0.62	0.45	0.37	0.21	0.81	0.54	0.29	0.34	0.57	0.32	0.35	0.16	0.62	0.27	-0.12	-0.16	-0.2275	-0.39	0.506027	0.294372	0.139591	0.999971	1	0.784948
Adra1a	P97718	0.99	-1.38	-0.22	0.34	-1.49	-0.86	-0.52	-0.39	-1.37	0.05	-0.04	-0.33	-1.46	-1.29	0.02	0.58	-0.7475	-0.355	-0.47	0.172884	0.526074	0.472245	0.999971	1	0.89314
Adra1b	P97717	-1.91	-3.06	-0.34	0.58	-2.38	-2.3	-0.19	0.01	-2.6	-1.36	0.21	-0.04	-1.57	-1.29	-0.03	1.02	-0.0325	0.235	0.715	0.972056	0.80174	0.436708	0.999971	1	0.882419
Adra2a	Q01338	1.23	-1.5	-1.36	-0.75	-0.83	-0.5	-0.42	-1.18	-0.67	1.2	-1.24	-1.74	-2.22	-1.14	-0.74	-1.54	-0.1375	-0.0175	-0.815	0.817706	0.982822	0.225043	0.999971	1	0.828225
Adra2c	Q01337	-0.89	-3.24	-1.03	-0.34	-1.75	-7.15	-2.37	0.41	-2.9	-1.2	-1.93	-0.55	-1.36	-1.71	-0.95	-1.85	-1.34	-0.27	-0.0925	0.389261	0.715806	0.879764	0.999971	1	0.985441
Adrbk2	Q3UYH7	0.88	-0.54	-0.73	-0.94	-0.31	0.07	-0.31	-0.35	-0.21	0.18	-0.87	-0.72	-0.58	-0.48	-0.64	-0.55	0.1075	-0.0725	-0.23	0.790642	0.872031	0.566004	0.999971	1	0.917959
Adrm1	Q9JKV1	0.91	0.88	1.1	0.74	0.75	1.19	1.78	1.23	0.64	0.51	1.46	1.38	0.49	1.03	1.62	0.71	0.33	0.09	0.055	0.210884	0.742588	0.841438	0.999971	1	0.979814
Adsl	P54822	-0.85	-0.56	-0.8	-0.89	-0.53	-0.83	-0.51	-0.8	-0.71	-0.85	-0.94	-0.91	-0.93	-0.74	-0.86	-1.17	0.1075	-0.0775	-0.15	0.565797	0.654029	0.433556	0.999971	1	0.882409
Adss1	P28650	1.24	2.35	2.51	1.66	1.97	1.73	2.98	1.6	1.96	0.7	1.75	1.87	1.48	1.54	1.5	0.9	0.13	-0.37	-0.585	0.752102	0.367701	0.106732	0.999971	1	0.78268
Adss2	P46664	0.27	0.43	0.26	0.13	0.58	0.53	-0.09	0.58	0.5	0.26	0.26	0.55	0.65	0.68	0.51	0.85	0.1275	0.12	0.4	0.56468	0.500435	0.0473961	0.999971	1	0.710102
Afap1	Q80YS6	0.77	-0.13	-0.25	0.29	-0.29	-0.55	-0.33	-0.3	-0.4	0.28	-0.04	0.09	-0.75	-1.24	-0.39	-0.04	-0.5375	-0.1875	-0.775	0.0658263	0.51529	0.0467928	0.999971	1	0.710102
Afap1l1	Q8BZI0	0.23	-0.2	-1.51	-0.83	-1.01	-0.83	-2.13	-1.55	-1.64	-0.24	-1.81	-1.82	-1.52	-1.36	-0.67	-1.13	-0.8025	-0.8	-0.5925	0.102034	0.137577	0.167516	0.999971	1	0.800215
Afap1l2	Q5DTU0	-1.09	-1.09	-0.09	-0.07	-0.24	-0.82	-0.6	0.41	-0.71	-1.19	0.29	0.36	-1.57	-0.78	-0.09	0.68	0.2725	0.2725	0.145	0.482384	0.550979	0.780642	0.999971	1	0.965859
Afdn	Q9QZQ1	-0.82	-1.35	-0.34	-0.55	-1	-1.05	0	-0.55	-0.86	-0.81	-0.25	-0.37	-0.8	-1.1	-0.46	-0.35	0.115	0.1925	0.0875	0.726223	0.499127	0.763063	0.999971	1	0.961892
Afdn_1	E9PYX7	-1.05	-1.28	-2.04	-1.67	-1.79	-1.89	-1.16	-1.43	-1.65	-1.5	-1.08	-1.42	-2.54	-1.65	-1.37	-0.72	-0.0575	0.0975	-0.06	0.841719	0.71673	0.88503	0.999971	1	0.98711
Aff4	Q9ESC8	1.78	-0.56	0.37	0.83	0.29	0.28	0.65	0.42	0.43	1.38	-0.37	-0.26	-0.93	0.67	0.27	0.4	-0.195	-0.31	-0.5025	0.674642	0.596779	0.375784	0.999971	1	0.870465
Afg1l	Q3V384	-0.92	-0.44	-0.38	-0.81	-0.55	-0.87	-0.25	-0.58	-0.52	-1.45	-0.34	-0.25	-0.49	-0.83	-0.79	-0.65	0.075	-0.0025	-0.0525	0.739656	0.993577	0.800743	0.999971	1	0.971076
Afg3l1	Q920A7	1.6	-1.11	-0.79	-0.73	-1.89	-1.25	-0.16	-0.62	-1.77	0.24	-0.1	-0.41	-0.7	-1.08	-0.38	-0.3	-0.7225	-0.2525	-0.3575	0.291423	0.717573	0.551481	0.999971	1	0.913379
Afg3l2	Q8JZQ2	0.02	0.18	-0.65	-0.61	-0.09	0.24	-0.59	-0.66	-0.08	0.13	-0.46	-0.75	0.02	-0.08	-0.76	-0.69	-0.01	-0.025	-0.1125	0.974051	0.933085	0.710836	0.999971	1	0.950695
Afm	O89020	0.85	2.33	0.65	3.01	3.96	1.78	2.31	1.14	1.26	0.67	1.62	1.74	1.48	1.96	1.16	1.86	0.5875	-0.3875	-0.095	0.441388	0.504034	0.863674	0.999971	1	0.983079
Aftph	Q80WT5-2	0.4	0.34	0.44	0.41	0.34	0.42	0.97	0.14	0.13	0.59	0.4	0.48	0.43	0.43	0.08	0.19	0.07	0.0025	-0.115	0.752697	0.988682	0.519574	0.999971	1	0.906123
Aga	Q64191	-0.66	-0.52	0.1	0.27	-0.74	-1.05	-0.25	0.65	-0.98	-0.97	-0.17	-0.33	-1.49	-0.47	-0.23	0.17	-0.145	-0.41	-0.3025	0.726839	0.214869	0.460255	0.999971	1	0.889706
Agap1	A0A087WRF2	1.21	0.18	-0.6	-0.3	-0.16	-0.17	-1.06	-0.29	0.43	1.5	-0.95	-0.8	0.02	0.27	-0.33	-0.41	-0.5425	-0.0775	-0.235	0.225038	0.903383	0.567944	0.999971	1	0.91816
Agap1_1	A0A1D5RLD2	1.22	-0.63	0.13	-0.18	-0.53	-0.42	0.15	0.53	-0.02	0.86	0.01	-0.25	-0.27	-0.15	-0.41	-0.08	-0.2025	0.015	-0.3625	0.646332	0.972665	0.360464	0.999971	1	0.869526
Agap1_2	E9Q3K3	0.23	-0.23	-0.81	-0.37	-0.25	-0.5	-0.76	-0.27	-0.14	0.23	-0.55	-0.72	0.02	-0.31	-0.35	-0.43	-0.15	-7.85046e-17	0.0275	0.576382	1	0.915804	0.999971	1	0.992633
Agap2	Q3UHD9	-0.09	-1.15	-0.68	-0.47	-1.2	-0.67	0.03	-0.6	-1.21	-0.56	-0.78	-0.99	-0.82	-1.03	-0.56	-0.45	-0.0125	-0.2875	-0.1175	0.970059	0.314069	0.670572	0.999971	1	0.93891
Agap3	Q8VHH5	0.23	-0.88	-1	-0.87	-0.72	-1.06	-0.79	-0.99	-0.64	-0.08	-0.73	-0.62	-0.95	-0.88	-0.99	-0.98	-0.26	0.1125	-0.32	0.405074	0.729513	0.300493	0.999971	1	0.847402
Agap3_1	A0A1D5RMG4	1.45	0.1	0.35	-0.1	-0.07	0.48	0.03	0.59	-0.11	0.9	0.37	0.09	0.09	0.64	0.65	0.46	-0.1925	-0.1375	0.01	0.606298	0.727627	0.977911	0.999971	1	0.99925
Agbl4	E4W7Y4	-2.25	-1.04	-0.44	-0.35	-0.4	-0.08	0.49	0.05	-0.8	-1.54	0.11	0.19	-0.57	-0.68	-0.43	-0.24	1.035	0.51	0.54	0.0428348	0.369364	0.225172	0.999971	1	0.828225
Agfg1	A0A087WNV1	0.42	-0.36	-0.07	0.2	-0.32	-0.27	0.41	-0.15	-0.24	0.03	0.04	-0.01	-0.61	-0.36	-0.32	0.12	-0.13	-0.0925	-0.34	0.620963	0.677074	0.203456	0.999971	1	0.81617
Agfg2	Q3U2K8	0.35	-0.12	0.5	0.39	0.09	0.09	0.85	0.15	0.46	-0.2	0.32	0.25	0.14	0.04	0.33	0.05	0.015	-0.0725	-0.14	0.953218	0.755121	0.504075	0.999971	1	0.905265
Agk	Q9ESW4	-0.07	-0.48	-0.85	-0.65	-0.5	-0.64	-0.79	-0.59	-0.43	-0.02	-0.71	-0.84	-0.12	-0.52	-0.69	-0.55	-0.1175	0.0125	0.0425	0.596657	0.962384	0.859368	0.999971	1	0.982702
Agl	F8VPN4	-0.77	-0.54	-0.65	-0.61	-0.42	-0.24	-0.33	-0.41	-0.44	-0.81	-0.64	-0.45	-0.15	-0.24	-0.68	-0.44	0.2925	0.0575	0.265	0.105996	0.745075	0.193212	0.999971	1	0.810547
Ago1	A0A6I8MX18	-0.14	0.62	0.14	0	0.27	-0.03	-0.18	-0.11	0.29	-0.04	0.07	0.47	0.34	0.47	-0.08	-0.21	-0.1675	0.0425	-0.025	0.474069	0.855773	0.92264	0.999971	1	0.993264
Ago2	Q8CJG0	0.9	0.88	1	1.12	0.91	0.78	0.62	1.08	0.59	1.09	0.46	0.62	0.34	1.01	0.68	0.98	-0.1275	-0.285	-0.2225	0.49651	0.180893	0.314682	0.999971	1	0.851546
Ago3	Q8CJF9	1.29	1.02	0.97	0.91	0.55	1.02	0.12	1	0.18	1.1	0.56	0.64	0.39	1.12	1.11	1.33	-0.375	-0.4275	-0.06	0.166688	0.0999055	0.810927	0.999971	1	0.973864
Agpat1	A0A0R4J263	0.03	0.3	0.87	0.47	0.34	0.13	1.11	1.17	1	0	1.64	2.22	2.05	0.28	1.59	1.09	0.27	0.7975	0.835	0.408891	0.120829	0.0626431	0.999971	1	0.725348
Agpat3	Q9D517	-0.58	-0.47	-0.19	0.03	-0.6	-0.15	-0.36	0.73	-0.4	-0.15	0.02	-0.29	-0.2	-0.04	0.33	0.22	0.2075	0.0975	0.38	0.524903	0.646009	0.118608	0.999971	1	0.78268
Agpat4	Q8K4X7	-0.55	-0.5	-0.02	-0.29	-0.6	-0.23	0.04	0.07	-0.37	-0.24	0.3	0.03	-0.18	-0.01	0.05	-0.24	0.16	0.27	0.245	0.498289	0.255342	0.238847	0.999971	1	0.833594
Agpat5	Q9D1E8	-0.72	-1.89	-0.03	0.16	-1.57	-2.04	0.33	0.2	-1.34	-1.19	-0.03	-0.05	-1.64	-1.64	0.14	-0.37	-0.15	-0.0325	-0.2575	0.827956	0.951989	0.665489	0.999971	1	0.93697
Agps	A2AL50	-0.49	-0.53	-0.12	-0.2	-0.53	-0.42	-0.39	0.11	-0.46	-0.22	-0.08	-0.19	-0.2	-0.08	0.47	0.17	0.0275	0.0975	0.425	0.900332	0.612376	0.0840276	0.999971	1	0.755254
Agrn	M0QWP1	0.81	0.12	0.41	0.49	0.68	0.13	0.9	-0.38	0.48	0.72	0.97	0.56	0.04	0.19	0.56	0.1	-0.125	0.225	-0.235	0.699005	0.319848	0.312483	0.999971	1	0.849367
Agt	Q3UTR7	-0.08	0.58	0.95	1.4	0.96	0.58	1.27	1.41	1.33	0.39	1.63	2.07	1.03	1.53	1.67	2.58	0.3425	0.6425	0.99	0.348266	0.175748	0.0427488	0.999971	1	0.701725
Agtpbp1	Q641K1-2	-0.4	-0.33	0.15	0.16	-0.32	-0.43	0.11	-0.23	-0.3	-0.06	-0.32	-0.27	-0.37	-0.75	0.02	-0.28	-0.1125	-0.1325	-0.24	0.625722	0.53157	0.347304	0.999971	1	0.864164
Ahctf1	Q8CJF7	-0.22	-1.31	-0.59	-0.34	-1.06	-1.21	-1.08	-0.38	-1.42	-0.95	-0.88	-0.74	-1.4	-0.87	-0.45	-0.24	-0.3175	-0.3825	-0.125	0.323671	0.21623	0.720906	0.999971	1	0.954713
Ahcy	P50247	0.34	1	0.38	0.25	1.05	0.91	0.3	0.28	1.03	0.03	0.13	0.26	0.81	0.57	0.21	0.26	0.1425	-0.13	-0.03	0.613111	0.66021	0.904562	0.999971	1	0.991091
Ahcyl1	Q80SW1	-1.16	-1.46	-0.07	-0.22	-1.37	-1	-0.37	0.28	-1.07	-1.17	-0.22	-0.21	-1.16	-1.07	0.05	-0.04	0.1125	0.06	0.1725	0.809616	0.884206	0.699323	0.999971	1	0.947892
Ahcyl2	Q68FL4-2	1.2	2.06	2.59	0.81	-0.1	1.1	0.82	0.58	1.55	1.05	-3.63	1.51	0.21	1.3	0.66	1.81	-1.065	-1.545	-0.67	0.039388	0.21359	0.201503	0.999971	1	0.815758
Ahcyl2_1	F8WGT1	-1.03	-0.78	-0.42	-0.45	-0.95	0.14	-0.37	0.21	-0.61	-0.87	-0.4	-0.25	-0.71	0.19	-0.23	-0.29	0.4275	0.1375	0.41	0.192152	0.557364	0.14006	0.999971	1	0.784948
Ahdc1	Q6PAL7	0.37	0.61	0.31	0.3	0.6	0.35	-0.05	0.37	0.49	0.42	0.23	0.08	0.63	0.4	0.46	0.35	-0.08	-0.0925	0.0625	0.699436	0.618956	0.726394	0.999971	1	0.956041
Ahi1	E9QP54	0.85	-1.23	0.5	0.24	0.09	-0.07	0.45	1.31	0.69	-0.16	-1.17	0.82	0.76	1.27	1.65	-0.12	0.355	-0.045	0.8	0.492604	0.939721	0.170211	0.999971	1	0.802549
Ahnak	E9Q616	0.64	0.22	-0.07	0.74	1.62	0.08	-0.1	-0.34	0.36	1.19	0.11	0.91	-0.24	0.73	0.48	0.32	-0.0675	0.26	-0.06	0.881229	0.417573	0.836745	0.999971	1	0.979416
Ahnak2	A0A7N9VR94	-0.42	-0.93	-1.12	-0.88	-0.94	-0.92	-1.27	-0.48	-0.72	0.08	-0.72	-0.58	0.1	-0.37	-0.62	-0.57	-0.065	0.3525	0.4725	0.793843	0.202605	0.085948	0.999971	1	0.759991
Ahsa1	Q8BK64	-0.1	0.61	0.59	0.26	0.68	0.87	1.02	0.33	0.85	0.14	0.81	1.1	0.56	0.34	0.37	0.4	0.385	0.385	0.0775	0.151234	0.191686	0.724882	0.999971	1	0.955813
Ahsa2	F6S1R2	0.41	0.34	0.78	-0.48	0.4	0.8	-0.21	-0.6	0.42	0.38	-0.4	-0.47	0.32	0.9	-0.41	-0.02	-0.165	-0.28	-0.065	0.675731	0.435699	0.861706	0.999971	1	0.982963
Ahsg	P29699	1.65	2.24	0.87	3.7	4.15	2.66	3.41	2.44	2.13	1.6	2.16	1.99	2.1	3.27	2.52	2.42	1.05	-0.145	0.4625	0.131714	0.797404	0.443131	0.999971	1	0.883386
Aida	Q8C4Q6	-0.51	-0.51	-0.63	-0.71	-0.34	-0.68	-0.93	-0.84	-0.65	-0.69	-0.96	-0.44	-0.23	-0.49	-0.85	-0.49	-0.1075	-0.095	0.075	0.591058	0.609304	0.705682	0.999971	1	0.950182
Aif1	O70200	0.63	-0.6	0.47	0.7	-0.42	-0.22	0.68	0.16	-0.32	0.35	0.09	0.46	-0.88	-0.35	0.42	-0.17	-0.25	-0.155	-0.545	0.511138	0.65502	0.186385	0.999971	1	0.809025
Aifm1	B1AU25	-0.32	-0.36	-0.47	-0.55	-0.66	-0.53	-0.21	-0.41	-0.36	-0.72	-0.55	-0.33	-0.35	-0.37	-0.55	-0.52	-0.0275	-0.065	-0.0225	0.880875	0.716569	0.894698	0.999971	1	0.988571
Aifm2	Q8BUE4	-0.65	-1.12	-1.21	-1.27	-0.91	-0.72	-1	-1.31	-0.74	-0.53	-1.1	-0.46	-0.78	-0.25	-1.38	-0.91	0.0775	0.355	0.2325	0.733361	0.155601	0.42507	0.999971	1	0.880275
Aifm3	Q3TY86	-0.21	-0.59	0.07	-0.33	-0.63	-0.22	0.12	-0.86	-0.79	-0.42	0.1	-0.42	-0.43	-0.63	-0.16	-0.42	-0.1325	-0.1175	-0.145	0.631466	0.644303	0.50653	0.999971	1	0.905775
Aig1	H7BX91	4.89	-2.98	1.46	-0.22	-4.81	0.7	7.19	-2.92	-7.56	4.09	-1.39	-3.24	-6.44	-5.39	-1.97	-4.04	-0.7475	-2.8125	-5.2475	0.785906	0.296309	0.0121754	0.999971	1	0.613095
Aimp1	P31230	0.85	1.39	1.16	1.2	1.12	1.39	1.2	1.25	1.37	1.45	1.53	1.09	1.14	1.66	1.38	1.51	0.09	0.21	0.2725	0.640292	0.310492	0.21491	0.999971	1	0.826893
Aimp2	Q8R010	1.18	1.31	1.03	1.37	1.22	1.26	1.59	1.1	1.62	1.78	1.66	1.02	0.77	1.58	1.37	0.98	0.07	0.2975	-0.0475	0.718173	0.207324	0.839763	0.999971	1	0.979728
Aip	O08915	0.74	0.28	0.62	0.49	0.3	0.57	0.57	0.74	0.46	0.11	0.76	0.35	0.62	0.91	0.89	0.28	0.0125	-0.1125	0.1425	0.949077	0.598847	0.52473	0.999971	1	0.90868
Ajap1	A2ALI5	-0.53	1.55	-1.43	-0.95	2.61	0.74	-0.78	-1.82	2.58	-0.67	-2.07	-1.98	4.71	0.74	-1.65	-1.82	0.5275	-0.195	0.835	0.614175	0.863957	0.573874	0.999971	1	0.91816
Ajm1	A2AJA9	-0.66	-1.08	-1.33	-1.31	-1.03	-1.03	-1.04	-1.49	-0.96	-0.79	-1.55	-1.62	-0.55	-1.29	-1.86	-1.86	-0.0525	-0.135	-0.295	0.820119	0.626739	0.401071	0.999971	1	0.871816
Ak1	Q9R0Y5	0.14	0.45	-0.04	0.43	0.35	0.89	0.2	0.13	0.39	0.58	-0.03	-0.13	0.07	0.58	-0.1	0.03	0.1475	-0.0425	-0.1	0.544999	0.858069	0.665148	0.999971	1	0.93697
Ak2	Q9WTP6	0.55	-0.38	-0.22	0.17	-0.51	-0.49	-0.54	0.12	-0.24	0.34	-0.08	0.27	-0.25	-0.11	0.03	0.09	-0.385	0.0425	-0.09	0.18972	0.874266	0.720104	0.999971	1	0.954623
Ak3	Q9WTP7	-0.14	-0.67	-0.8	-1	-0.37	-0.66	-0.63	-0.83	-0.53	-0.34	-0.65	-0.71	-0.36	-0.54	-0.97	-1.03	0.03	0.095	-0.0725	0.900381	0.686202	0.786493	0.999971	1	0.967132
Ak4	Q9WUR9	-0.2	-0.47	-0.28	-0.41	-0.51	-0.48	-0.58	-0.53	-0.7	-0.49	-0.94	-0.76	-0.73	-0.47	-0.62	-0.47	-0.185	-0.3825	-0.2325	0.284147	0.0604896	0.207544	0.999971	1	0.820632
Ak5	Q920P5	0.25	0.09	0.74	0.48	0.06	0.6	0.81	0.86	-0.03	0.02	0.5	0.22	0.22	0.52	0.53	0.91	0.1925	-0.2125	0.155	0.460129	0.355627	0.516331	0.999971	1	0.905815
Akap1	O08715	0.2	-0.03	0.16	0.03	-0.1	-0.54	0.23	-0.1	0.02	-0.19	0.22	-0.05	0.39	-0.23	-0.06	-0.1	-0.2175	-0.09	-0.09	0.325024	0.613133	0.658734	0.999971	1	0.93472
Akap10	O88845	-0.74	-0.52	-0.5	-0.62	-0.1	-0.81	-0.12	-0.48	-0.2	-0.75	0.08	0.3	-0.18	-0.93	-0.48	-0.56	0.2175	0.4525	0.0575	0.3382	0.105283	0.78774	0.999971	1	0.96724
Akap11	E9Q777	-1.87	-0.51	0.43	0.07	1.03	-0.22	-0.2	-0.24	0.54	-0.97	-0.01	-0.13	-0.77	-0.76	-0.13	-0.25	0.5625	0.3275	-0.0075	0.317997	0.554736	0.9879	0.999971	1	0.99925
Akap12	Q9WTQ5	0.06	-1.01	-0.63	-0.53	-0.7	-0.89	-0.34	-0.61	-0.65	-0.13	-0.77	-0.49	-0.69	-0.49	-0.18	-0.45	-0.1075	0.0175	0.075	0.690557	0.949541	0.778831	0.999971	1	0.96575
Akap13	E9Q394-2	2.51	1.46	1.17	1.51	2.19	2.49	1.68	0.04	1.47	1.72	0.46	0.23	1.75	1.11	0.01	0.6	-0.0625	-0.6925	-0.795	0.912247	0.14519	0.101241	0.999971	1	0.78268
Akap5	H3BIV5	-0.45	-2.27	-1.22	-0.75	-1.94	-2.16	-0.83	-1.27	-2.12	-1.4	-1.86	-1.5	-2.22	-2.03	-1.41	-1.56	-0.3775	-0.5475	-0.6325	0.429707	0.207047	0.158027	0.999971	1	0.797252
Akap6	E9Q9K8	0.69	0.45	0.38	0.39	0.75	0.2	0.43	0.62	0.52	0.64	0.78	1.01	0.42	0.31	0.42	0.38	0.0225	0.26	-0.095	0.909938	0.194262	0.582608	0.999971	1	0.920364
Akap7	Q7TN79	-0.02	-1.31	-0.92	-0.78	-1.39	-0.94	-0.73	-0.7	-1.25	-0.76	-0.74	-1.05	-0.85	-1.11	-0.63	-0.49	-0.1825	-0.1925	-0.0125	0.56811	0.530466	0.967668	0.999971	1	0.998787
Akap8	Q9DBR0	1.07	1.5	2.53	2.15	1.13	0.59	2.14	1.31	1.18	0.96	1.79	1.59	0.11	0.74	1.64	1.39	-0.52	-0.4325	-0.8425	0.248722	0.258321	0.0864179	0.999971	1	0.759991
Akap8l	A0A494B9L0	1.28	0.73	0.84	0.62	0.76	0.84	1.09	0.66	0.71	0.79	0.9	1.19	-0.05	0.36	0.74	0.3	-0.03	0.03	-0.53	0.890064	0.891259	0.0568241	0.999971	1	0.725348
Akap9	E9QQ10	1	1.17	1.13	1.65	0.97	0.48	1.16	1.49	1	1.08	1.25	1.53	0.85	0.84	1.29	1.14	-0.2125	-0.0225	-0.2075	0.443947	0.91961	0.365149	0.999971	1	0.869526
Akr1a1	Q9JII6	1.81	0.61	1.1	0.65	0.63	0.54	1.72	0.36	0.68	0.9	0.75	0.56	0.51	-0.41	0.15	-0.2	-0.23	-0.32	-1.03	0.566361	0.297039	0.013928	0.999971	1	0.613095
Akr1b1	P45376	-0.09	0.7	1.16	0.6	0.76	0.29	0.85	1.03	1.27	-0.09	1.18	0.79	1.18	0.29	1.02	1.13	0.14	0.195	0.3125	0.651488	0.618653	0.357946	0.999971	1	0.868793
Akr1b10	G5E895	-0.98	0.74	0.97	-0.22	1.23	0.55	1.24	-0.08	1.83	-0.97	1.27	1.82	2.74	0.16	0.73	0.25	0.6075	0.86	0.8425	0.252085	0.258044	0.237576	0.999971	1	0.833594
Akr1b7	P21300	-0.8	-0.1	-0.85	-1.33	-0.48	-0.17	-0.65	-0.68	-0.2	-0.78	-0.52	-1.01	-0.17	-0.05	0.11	0.56	0.275	0.1425	0.8825	0.35656	0.649231	0.0172863	0.999971	1	0.617356
Akr1e2	Q9DCT1	0.22	0.5	0.64	0.21	0.34	0.82	1	0.89	0.67	0.09	0.83	0.92	0.26	0.48	0.73	0.5	0.37	0.235	0.1	0.123504	0.347556	0.622216	0.999971	1	0.929759
Akr7a2	Q8CG76	0.58	0.58	0.48	0.16	0.06	0.33	0.26	0.04	0.16	0.36	0.26	0.25	-0.11	0.18	0.17	-0.07	-0.2775	-0.1925	-0.4075	0.169459	0.300441	0.0592234	0.999971	1	0.725348
Akt1	P31750	0.88	0.74	0.88	0.61	0.59	0.81	0.82	0.87	0.54	0.47	0.63	0.15	0.6	0.51	0.54	0.78	-0.005	-0.33	-0.17	0.977237	0.105602	0.346413	0.999971	1	0.864164
Akt1s1	Q9D1F4	-0.71	1.22	-0.23	0.25	1.02	1.25	-0.69	0.02	1.35	-0.2	-0.28	0.04	2.38	1.05	-0.04	0.47	0.2675	0.095	0.8325	0.635057	0.85519	0.193883	0.999971	1	0.810547
Akt2	Q60823	0.22	0.19	-0.13	0.05	-0.19	0.21	-0.19	0.95	-0.14	0.07	0.1	-0.02	-0.03	0.14	-0.01	0.5	0.1125	-0.08	0.0675	0.700716	0.648894	0.740496	0.999971	1	0.960899
Akt3	Q9WUA6	0.04	0.22	0.04	0.23	0.31	0.54	0.33	0.33	0.38	0.1	0.06	-0.05	0.52	0.37	-0.16	-0.08	0.245	-0.01	0.03	0.174911	0.955404	0.891538	0.999971	1	0.988225
Aktip	D3Z632	-0.36	1.4	1.2	1.05	1.14	1.31	0.61	1.45	0.93	0.45	1.17	1.23	1.12	1.5	1.17	1.6	0.305	0.1225	0.525	0.472662	0.769507	0.212166	0.999971	1	0.823193
Alad	P10518	0.41	0.84	0.33	0.68	0.85	0.72	0.02	0.14	0.71	0.46	0	0.2	0.6	1.02	0.64	0.74	-0.1325	-0.2225	0.185	0.614406	0.346377	0.380848	0.999971	1	0.871816
Alb	P07724	1.17	3.47	0.83	3.78	5.21	3.36	3.88	1.63	2.93	0.4	2.05	1.72	2.51	2.68	1.67	2.12	1.2075	-0.5375	-0.0675	0.225185	0.525809	0.92522	0.999971	1	0.99401
Alcam	E9Q3Q6	-1.08	-1.86	-1.44	-0.61	-1.21	-1.68	-0.96	-0.85	-1.25	-1.11	-1.31	-1.06	-1.07	-1.24	-0.58	-0.94	0.0725	0.065	0.29	0.82318	0.819441	0.357766	0.999971	1	0.868793
Aldh16a1	D3Z0B9	1.21	0.73	0.8	0.83	0.82	0.27	0.78	0.67	0.69	0.5	1.09	0.62	0.42	0.4	1.06	0.94	-0.2575	-0.1675	-0.1875	0.247868	0.438711	0.439025	0.999971	1	0.883105
Aldh18a1	Q9Z110	-0.55	-0.01	-0.46	-0.48	-0.27	-0.21	-0.3	-0.34	-0.03	-0.41	0.03	-0.22	-0.21	-0.27	-0.72	-0.57	0.095	0.2175	-0.0675	0.622795	0.309129	0.758188	0.999971	1	0.961116
Aldh18a1_1	Q9Z110-2	-0.14	-1.46	-2.03	-0.13	-0.19	-1.61	-0.82	-2.88	0.03	-3.05	-1.17	-0.72	-2.42	-1.73	-0.74	-0.4	-0.435	-0.2875	-0.3825	0.52762	0.697762	0.533835	0.999971	1	0.910077
Aldh1a1	P24549	-1.74	-1.92	-1.53	-1.15	-1	-1.84	-0.65	-1.28	-1.57	-2.1	-0.93	-0.58	-2.17	-1.85	-0.97	-1.12	0.3925	0.29	0.0575	0.222575	0.437224	0.862337	0.999971	1	0.982963
Aldh1a2	Q62148	2.04	1.45	1.38	2.52	2.12	1.09	1.04	1.95	1.19	1.25	1.07	1.58	0.19	2.21	1.71	1.64	-0.2975	-0.575	-0.41	0.438023	0.0809871	0.400556	0.999971	1	0.871816
Aldh1a7	O35945	-1.29	-0.49	0.22	0.71	-1.22	-1.48	0.28	1.24	-0.34	-0.05	1	1	-1.48	-0.89	0.92	1.36	-0.0825	0.615	0.19	0.906263	0.255471	0.79633	0.999971	1	0.970435
Aldh1b1	Q9CZS1	-0.42	-0.67	-0.85	-0.58	-0.77	-0.69	-0.96	-0.46	-0.74	-0.31	-0.69	-0.6	-1.04	-0.73	-0.69	-0.8	-0.09	0.045	-0.185	0.650351	0.814583	0.34133	0.999971	1	0.860984
Aldh1l1	Q8R0Y6	-0.46	-0.21	-0.42	-0.73	-0.46	-0.06	-0.54	-0.19	-0.06	-0.04	-0.62	-0.72	-0.03	-0.01	-0.47	-0.17	0.1425	0.095	0.285	0.498286	0.693138	0.189404	0.999971	1	0.810547
Aldh1l2	Q8K009	-1.19	-0.07	-0.06	-0.36	0.18	-0.21	-0.15	-0.14	0.04	-0.93	-0.61	-0.04	0.1	-0.58	-0.66	-0.7	0.34	0.035	-0.04	0.26203	0.919755	0.902556	0.999971	1	0.990759
Aldh2	P47738	-0.5	-0.8	-1.07	-1.28	-0.92	-1.08	0.3	-1.23	-1.21	-1.12	-1.37	-0.73	-1.12	-0.98	-1.29	-1.31	0.18	-0.195	-0.2625	0.634041	0.434553	0.265736	0.999971	1	0.842677
Aldh3a2	B1AV77	-1.74	-1.39	-0.89	-1.37	-1.19	-1.35	-0.86	-0.76	-1.41	-1.71	-1	-0.74	-1.79	-1.48	-0.64	-1.32	0.3075	0.1325	0.04	0.23966	0.647697	0.89607	0.999971	1	0.988571
Aldh3b1	Q80VQ0	-1.28	-1.02	-0.48	-0.72	-1.17	-1.34	-1.06	-0.08	-1.47	-1.71	-1.15	-0.9	-1.54	-1.66	-0.53	-0.76	-0.0375	-0.4325	-0.2475	0.9099	0.133137	0.461337	0.999971	1	0.89007
Aldh4a1	Q8CHT0	-0.56	-0.8	-0.97	-0.83	-0.86	-0.83	-0.79	-0.28	-0.71	-0.91	-0.85	-0.96	-0.9	-0.52	-1.08	-1.11	0.1	-0.0675	-0.1125	0.638099	0.703435	0.597071	0.999971	1	0.92377
Aldh5a1	Q8BWF0	-0.59	-1.11	-0.61	-1.2	-0.99	-1.14	-0.3	-0.88	-0.5	-1.49	-0.84	-0.58	-0.54	-1.65	-0.73	-1.35	0.05	0.025	-0.19	0.850698	0.930758	0.546267	0.999971	1	0.911398
Aldh6a1	Q9EQ20	-0.69	-0.92	-0.75	-0.92	-0.51	-0.85	-0.62	-0.17	-0.65	-0.96	-0.83	-1.07	-0.6	-0.96	-0.84	-0.97	0.2825	-0.0575	-0.0225	0.194544	0.749766	0.901666	0.999971	1	0.990759
Aldh7a1	Q9DBF1-2	-0.48	-0.09	-0.01	-0.07	0.01	0.14	-0.14	0.83	0.03	-0.47	-0.09	-0.03	0.44	-0.01	-0.02	0.06	0.3725	0.0225	0.28	0.179695	0.912671	0.199013	0.999971	1	0.813335
Aldh9a1	Q9JLJ2	-0.21	0.12	0.27	0.42	0.36	0.65	0.35	1.35	0.29	0.19	0.02	-0.11	0.56	0.71	0.79	0.49	0.5275	-0.0525	0.4875	0.0908178	0.801651	0.0394568	0.999971	1	0.700838
Aldoa	A6ZI44	0.77	0.54	-1.17	-0.78	-0.06	0.8	-0.95	-0.53	0.21	1.61	-0.62	1.12	0.79	0.71	-1.77	0.3	-0.025	0.74	0.1675	0.964264	0.259575	0.810276	0.999971	1	0.973864
Aldoa_1	P05064	0.06	0.33	0.85	0.51	-0.22	0.55	0.84	0.84	-0.27	-0.05	0.37	0.38	-0.24	0.36	0.61	0.81	0.065	-0.33	-0.0525	0.832115	0.217153	0.857904	0.999971	1	0.982702
Aldoc	P05063	-0.15	-0.55	-0.26	-0.42	-0.7	-0.43	-0.59	-0.12	-0.59	-0.58	-0.46	-0.24	-0.73	-0.32	-0.38	0.04	-0.115	-0.1225	-0.0025	0.581378	0.514785	0.991065	0.999971	1	0.99925
Alg1	Q921Q3	-2.02	-2.13	-0.45	0.24	-2.01	-2.21	-0.33	-0.18	-1.61	-2.06	-0.54	-0.6	-2.4	-2.19	-0.31	-0.36	-0.0925	-0.1125	-0.225	0.897457	0.859894	0.760591	0.999971	1	0.961116
Alg10b	Q3UGP8	-0.18	0.35	0.44	0.37	0.41	0.34	0.21	0.8	0.04	0.4	0.45	0.31	0.61	0.61	0.35	0.64	0.195	0.055	0.3075	0.405475	0.797257	0.168137	0.999971	1	0.800215
Alg11	Q3TZM9	-0.66	-0.29	-1.53	-1.17	-0.63	-0.85	-0.87	-1.25	-0.38	-0.39	-1.58	-1.23	-0.3	-0.47	-1.04	-1.11	0.0125	0.0175	0.1825	0.967615	0.964424	0.592693	0.999971	1	0.923227
Alg13	Q9D8C3	-0.58	-1.3	-0.39	-1.21	-1.38	-2.22	-1.18	-0.72	-3.84	-1.2	-1.55	-0.4	0.32	-2.55	-0.6	-1.51	-0.505	-0.8775	-0.215	0.200426	0.232684	0.720453	0.999971	1	0.954713
Alg2	Q9DBE8	-0.02	0.35	0.13	-0.01	0.23	0.12	-0.03	0.14	0.41	0.12	0.25	-0.08	0.83	0.64	0.45	0.44	0.0025	0.0625	0.4775	0.988927	0.747314	0.0328768	0.999971	1	0.685881
Alg3	A0A338P7B5	-0.12	-0.51	0.13	0.77	0.42	0.03	-0.16	-0.15	-0.13	0.79	0	0.53	-1.26	-0.2	1.02	1.47	-0.0325	0.23	0.19	0.915641	0.506601	0.757414	0.999971	1	0.961116
Alg5	Q9DB25	0.12	-0.62	0.27	0.35	-0.48	-0.15	-0.26	0.3	-0.2	-0.18	0.03	-0.13	-0.84	0.04	-0.03	0.02	-0.1775	-0.15	-0.2325	0.542587	0.556569	0.4645	0.999971	1	0.890905
Alg9	Q8VDI9	2.83	0	0.32	1.28	-0.22	0.84	0.93	-0.04	-0.19	2.5	-1.24	-1.39	-0.72	-0.12	-0.63	-1.69	-0.73	-1.1875	-1.8975	0.269885	0.250742	0.0162885	0.999971	1	0.613095
Alk	P97793	0.77	-1.76	-1.04	-0.52	-1.6	-1.34	-0.72	-1.23	-1.8	0.18	-0.75	-0.8	-2.12	-1.38	-0.31	-0.85	-0.585	-0.155	-0.5275	0.279277	0.800825	0.391583	0.999971	1	0.871816
Alkbh3	Q8K1E6	-1.72	1.14	1.28	-0.76	1.19	0.37	0.96	-0.61	2.51	-1.24	-0.02	-0.64	-0.9	-0.79	-0.6	-3.12	0.4925	0.1675	-1.3375	0.518672	0.866003	0.141119	0.999971	1	0.784967
Alkbh5	Q3TSG4	1.01	1.12	1.11	1.61	1.17	0.86	0.94	1.39	1.07	0.42	1.15	1.74	0.55	0.88	1.18	2.17	-0.1225	-0.1175	-0.0175	0.585282	0.703205	0.96177	0.999971	1	0.998721
Alkbh6	Q8K2U2	0.8	0.93	1.05	0.78	0.67	1.24	0.6	0.79	0.44	0.95	1.05	1.35	0.36	1.49	0.86	1.13	-0.065	0.0575	0.07	0.755791	0.805298	0.793765	0.999971	1	0.970141
Alkbh7	Q9D6Z0	-1.63	1.27	-2.23	-1.07	-1.41	-1.08	-1.62	-0.82	-1.1	-1.93	-3.42	-1.6	-0.19	-0.36	-1.43	-0.15	-0.3175	-1.0975	0.3825	0.656359	0.207149	0.609551	0.999971	1	0.92673
Alkbh8	Q80Y20-2	-0.67	-0.95	-0.09	-1.31	-0.29	-0.95	-0.31	-0.12	-0.1	-0.63	0.39	0.31	0.54	-0.54	-0.61	-0.92	0.3375	0.7475	0.3725	0.304798	0.054277	0.356576	0.999971	1	0.868793
Alox5ap	A0A0J9YUC8	0.23	-0.67	-1.42	-0.02	-1.15	-1.78	-1.68	-0.91	-0.91	-0.54	0.57	-0.2	-1.85	-0.37	-0.5	0.74	-0.91	0.2	-0.025	0.0479719	0.663176	0.966246	0.999971	1	0.998721
Alpl	P09242	-0.31	0.2	0.18	0.26	0.4	-0.77	0.2	-1.12	0.08	-0.04	-0.62	-0.01	0.13	-0.58	0.34	-0.34	-0.405	-0.23	-0.195	0.300389	0.347442	0.475765	0.999971	1	0.894045
Als2	Q920R0	0.47	-0.58	-0.45	-0.46	-0.71	-0.38	0.02	-0.7	-0.81	0.16	-0.57	-1.04	-0.22	-0.35	-0.74	-0.6	-0.1875	-0.31	-0.2225	0.543023	0.387175	0.443057	0.999971	1	0.883386
Alyref	O08583	-0.34	0.66	0.59	-0.14	1.05	0.49	0.68	0.05	1.25	-0.25	0.56	1.02	0.91	-0.14	0.3	-0.45	0.375	0.4525	-0.0375	0.270744	0.275885	0.920683	0.999971	1	0.992702
Amacr	O09174	-1.31	-1.79	-0.69	-0.85	-1.44	-1.9	-0.91	-0.74	-1.56	-1.22	-0.91	-0.41	-1.38	-1.61	-0.81	-0.49	-0.0875	0.135	0.0875	0.805132	0.695427	0.803461	0.999971	1	0.971467
Ambra1	A2AH22-7	1.35	0.29	1.29	1.05	0.46	1.15	1.61	0.85	0.32	0.71	0.54	0.7	-1.77	0.49	0.96	2.47	0.0225	-0.4275	-0.4575	0.94725	0.147615	0.579757	0.999971	1	0.91958
Amdhd2	F6UP77	-1.17	-0.23	-0.51	-0.53	1.04	-0.18	0.3	-0.77	2.17	-0.48	-0.16	-0.24	1.87	-0.03	-0.89	-0.61	0.7075	0.9325	0.695	0.11215	0.145389	0.262867	0.999971	1	0.842394
Amer2	A0A0R4J030	1.22	0.9	0.71	0.84	0.87	1.22	0.81	0.8	1.1	1.21	0.35	0.5	1	1.24	0.55	0.68	0.0075	-0.1275	-0.05	0.9705	0.627646	0.827561	0.999971	1	0.977122
Amer3	Q6NS69	2.26	1.13	0.74	0.52	0.7	1.62	0.34	0.36	2.21	2.11	-0.31	-0.97	1.22	-0.85	0.65	0.6	-0.4075	-0.4025	-0.7575	0.385133	0.625669	0.185604	0.999971	1	0.809025
Amfr	Q9R049-2	0.24	-0.48	-0.07	-0.29	-0.62	-0.58	0.14	-0.13	-0.42	0.39	-0.54	-0.36	-0.05	0.11	-0.1	-0.29	-0.1475	-0.0825	0.0675	0.577302	0.766063	0.759628	0.999971	1	0.961116
Amigo1	Q80ZD8	0.74	-0.62	-0.5	-0.62	-0.54	-0.44	-1.29	-0.33	-1.02	0.43	-0.93	-1.05	-0.08	-0.4	-0.6	-0.2	-0.4	-0.3925	-0.07	0.310513	0.402809	0.839767	0.999971	1	0.979728
Amigo2	Q80ZD9	-0.64	-1.27	-1.69	-0.79	-1.36	-0.81	-1.33	-0.57	-0.82	-0.4	-2.13	-0.64	-1.59	-0.46	-1.33	-0.98	0.08	0.1	0.0075	0.798398	0.816785	0.982347	0.999971	1	0.99925
Amot	Q8VHG2-2	0.07	-0.45	-0.84	-0.84	-0.35	0.12	-0.53	-0.67	-0.19	0.39	-0.66	-0.73	-0.28	-0.24	-0.72	-1.11	0.1575	0.2175	-0.0725	0.587944	0.52085	0.812411	0.999971	1	0.974458
Amotl1	A0A1Y7VM69	-0.48	-3.9	-1.01	-0.57	-2.75	-3.67	-0.9	-0.93	-2.69	-1.66	-0.71	-0.41	-3.31	-3.36	-0.87	-0.5	-0.5725	0.1225	-0.52	0.551198	0.887663	0.605486	0.999971	1	0.92451
Amotl2	B8JK87	2.26	-1.06	0.62	0.44	-1.49	-0.31	2.27	-0.9	-1.62	1.3	-0.81	1.27	-2.66	-1.4	-2.38	-3.76	-0.6725	-0.53	-3.115	0.488275	0.562216	0.00258204	0.999971	1	0.560302
Ampd2	A2AE27	-0.22	-0.26	-0.25	-0.6	-0.33	-0.47	0.02	-0.99	-0.28	-0.54	-0.65	-0.44	-0.41	-0.49	-0.47	-0.77	-0.11	-0.145	-0.2025	0.666509	0.442262	0.301488	0.999971	1	0.847402
Ampd3	A0A1L1SRX2	-0.64	-0.77	-1.03	-0.12	-0.35	-0.99	-0.68	-0.57	0.16	-0.87	-0.73	-0.63	-0.43	-0.67	-0.23	-0.28	-0.0075	0.1225	0.2375	0.976753	0.690029	0.347641	0.999971	1	0.864164
Amph	Q7TQF7	0	-0.05	0.76	1	-0.29	0.37	0.81	0.74	0.05	-0.03	0.81	-0.34	-0.45	-0.22	0.95	0.4	-0.02	-0.305	-0.2575	0.955398	0.399515	0.521039	0.999971	1	0.906972
Amt	Q8CFA2	-0.58	-0.98	-0.82	-1.3	-0.72	-0.64	-0.73	-0.25	-0.67	-0.06	-0.61	-0.91	-0.52	-0.44	-0.61	-1.06	0.335	0.3575	0.2625	0.166797	0.188722	0.289213	0.999971	1	0.847402
Amz2	B1AT59	0.83	0.26	0.11	0.33	0.13	0.14	0.84	-0.1	-0.25	-0.28	0.01	0.04	-0.58	-0.7	0.18	-0.94	-0.13	-0.5025	-0.8925	0.637398	0.0444108	0.0142955	0.999971	1	0.613095
Anapc1	P53995	-0.46	0.22	0.34	0.45	0.25	0.04	0.36	0.4	0.25	-0.15	0.42	0.66	0.03	0.4	0.62	0.51	0.125	0.1575	0.2525	0.617459	0.57772	0.351927	0.999971	1	0.867656
Anapc13	Q8R034	1.14	0.73	0.63	0.24	0.47	-0.33	0.23	1.38	0.43	-2.02	0.52	0.14	0.16	0.94	0.8	0.59	-0.2475	-0.9175	-0.0625	0.52621	0.14004	0.817761	0.999971	1	0.974929
Anapc16	Q9CPV2	0.29	0.67	0.7	1.18	1.54	0.5	-0.09	0.86	0.66	1.24	0.43	0.85	0.66	0.96	0.7	1.07	-0.0075	0.085	0.1375	0.983994	0.752148	0.571882	0.999971	1	0.91816
Anapc2	Q8BZQ7	0.16	1.23	0.63	0.87	0.86	1.14	0.15	1.12	0.96	0.52	0.46	1.15	1.11	1.52	1.08	1.23	0.095	0.05	0.5125	0.769403	0.863508	0.0820123	0.999971	1	0.755254
Anapc4	Q91W96	-0.17	0.67	0.13	0.13	0.34	0.41	-0.42	0.17	0.26	0.25	-0.13	0.08	0.4	0.75	0.1	0.3	-0.065	-0.075	0.1975	0.813061	0.746725	0.438442	0.999971	1	0.882889
Anapc5	A0A0G2JE03	0.38	0.75	0.75	0.79	0.74	0.49	0.31	0.99	0.61	0.48	0.95	1.11	0.66	1.13	1.38	1.02	-0.035	0.12	0.38	0.873821	0.583894	0.113849	0.999971	1	0.78268
Anapc7	Q9WVM3	0.97	1.18	0.84	0.86	0.3	0.21	0.36	0.82	1.35	0.1	0.72	1.12	1.37	0.14	0.9	0.92	-0.54	-0.14	-0.13	0.0273866	0.636131	0.646912	0.999971	1	0.933613
Angel2	Q8K1C0-3	0.15	-0.66	-0.55	-0.87	-0.98	-0.62	-0.72	-0.74	-1.23	-1.01	-1	-0.95	-1.64	-1.08	-0.6	-0.96	-0.2825	-0.565	-0.5875	0.290485	0.0499372	0.0883845	0.999971	1	0.766448
Ank1	A0A0R4J1N7	-0.67	-0.6	-1.36	-0.5	-0.45	-0.88	-0.87	-1.31	-1.03	-1.11	-1.54	-1.41	-0.67	-0.79	-1.51	-1.42	-0.095	-0.49	-0.315	0.733942	0.0809015	0.308721	0.999971	1	0.847402
Ank2	S4R2D6	-1.05	-1.33	0.5	-0.72	-1	-0.97	0.57	0.06	-0.67	-1.96	0.35	0.38	0.36	-2.13	-0.06	-1.32	0.315	0.175	-0.1375	0.547138	0.780048	0.829268	0.999971	1	0.978248
Ank2_1	Q8C8R3-7	2.56	-0.98	-0.71	-0.76	-1.15	-0.08	0.71	-1.85	-1.19	0.97	-0.41	-2.07	-2.21	-1.13	-1.48	-2.02	-0.62	-0.7025	-1.7375	0.501768	0.470229	0.053045	0.999971	1	0.725348
Ank2_2	Q8C8R3-2	-0.22	-0.81	-1.24	-1.52	-0.53	-0.49	-1.14	-1.59	-0.34	-0.43	-0.92	-0.7	-0.05	-0.67	-1.2	-1.23	0.01	0.35	0.16	0.978662	0.28453	0.677421	0.999971	1	0.942594
Ank2_3	Q8C8R3-4	-0.29	-1.21	-0.84	-0.89	-1.26	-0.97	-0.63	-1.09	-1.09	-0.68	-1.08	-0.89	-0.73	-1.29	-0.8	-0.9	-0.18	-0.1275	-0.1225	0.490542	0.602492	0.632929	0.999971	1	0.93301
Ank3	S4R2K9	-0.71	-1.15	-0.7	-0.93	-1.3	-1.09	-0.84	-0.94	-1.29	-0.99	-1.04	-0.98	-1.03	-1.13	-0.88	-0.96	-0.17	-0.2025	-0.1275	0.41081	0.303838	0.505647	0.999971	1	0.905277
Ank3_1	A0A087WNU5	0.13	-0.86	-0.7	-0.43	-0.88	-1.15	-0.77	-0.45	-0.85	-0.33	-0.94	-0.98	-0.69	-0.95	-0.94	-0.76	-0.3475	-0.31	-0.37	0.231276	0.283925	0.169925	0.999971	1	0.802438
Ank3_2	A0A087WRP9	-1.53	-0.4	-1.18	-1.42	-0.69	-1.64	-2.5	-0.63	-1.22	-1.35	-0.83	-1.85	-0.86	-0.92	-0.93	-0.94	-0.2325	-0.18	0.22	0.62792	0.588324	0.430901	0.999971	1	0.881611
Ank3_3	G5E8K2	-0.4	-0.64	-1.85	-2.17	-1.7	-1.22	-1.88	-2.76	-1.97	-0.85	-1.85	-2.26	-1.19	-0.73	-1.87	-2.36	-0.625	-0.4675	-0.2725	0.23495	0.360704	0.605958	0.999971	1	0.924649
Ankfn1	F6X7B3	-0.71	-0.32	2.27	1.54	0.54	-0.02	0.18	2.08	0.18	-0.79	3.31	0.41	1.02	-0.15	2.8	0.88	0	0.0825	0.4425	1	0.935688	0.604578	1	1	0.924454
Ankfy1	Q810B6	-0.02	0.36	0.28	0.1	0.03	0.07	0.1	0.02	0.33	-0.03	0.18	0.2	0.41	-0.1	0.31	0.15	-0.125	-0.01	0.0125	0.480734	0.956308	0.95015	0.999971	1	0.998038
Ankh	Q9JHZ2	0.46	1.46	1.06	0.63	0.81	1.58	0.64	1.11	0.71	0.65	1.62	1.19	1.41	1.67	0.87	1.65	0.1325	0.14	0.4975	0.670535	0.664404	0.12521	0.999971	1	0.78268
Ankhd1	E9Q1M6	1.27	0.99	0.87	1.24	0.81	0.9	0.43	0.69	0.52	0.94	0.42	0.43	0.57	0.84	0.88	0.91	-0.385	-0.515	-0.2925	0.0804675	0.0319801	0.152944	0.999971	1	0.795578
Ankib1	Q6ZPS6	0.24	-0.34	-0.06	-0.38	-0.34	-0.2	0.01	-0.18	-0.31	0.04	-0.4	-0.63	-0.39	-0.64	-0.18	-0.29	-0.0425	-0.19	-0.24	0.840293	0.424821	0.291004	0.999971	1	0.847402
Ankle2	Q6P1H6	0.09	-0.07	-0.2	0.13	-0.22	-0.25	-0.19	0.03	-0.07	0.2	-0.22	-0.28	0.27	-0.26	0	-0.06	-0.145	-0.08	0	0.42729	0.677687	1	0.999971	1	1
Ankmy1	E0CYY3	2.7	-0.04	-1.06	0.73	0.22	2.02	-0.9	0.73	-0.01	1.64	-0.25	0.25	-3.75	-1	0.02	0.09	-0.065	-0.175	-1.7425	0.942019	0.830017	0.130692	0.999971	1	0.784948
Ankmy2	Q3TPE9	0.34	0.23	-0.34	-0.97	0.31	0.42	-0.11	-0.28	0.72	0.39	-0.02	-0.07	0.79	0.51	-0.09	-0.24	0.27	0.44	0.4275	0.436327	0.228131	0.273449	0.999971	1	0.843794
Ankrd13a	Q80UP5	-0.22	-0.5	0.77	0.39	-0.51	-0.15	0.07	0.94	-0.42	0.08	0.02	0.99	-0.18	0.21	0.9	1.01	-0.0225	0.0575	0.375	0.955397	0.884664	0.348572	0.999971	1	0.865162
Ankrd13c	Q3UX43	-1.78	-0.23	-0.41	0.04	-0.38	-0.22	-0.31	-0.13	-0.34	-0.94	0.42	-0.28	0.13	-0.2	0.09	0.06	0.335	0.31	0.615	0.403405	0.508143	0.146738	0.999971	1	0.793221
Ankrd13d	Q6PD24	0.24	-0.72	0.13	0.02	-0.53	-0.29	0.55	0.11	-0.64	-0.34	0.18	0.21	-0.64	-0.36	0.1	0.09	0.0425	-0.065	-0.12	0.895175	0.831813	0.68446	0.999971	1	0.944176
Ankrd17	A0A0G2JDZ9	1.57	1.81	1.68	1.9	1.57	1.62	1.58	2.02	1.42	1.5	1.87	2.07	1.47	1.82	1.84	2.09	-0.0425	-0.025	0.065	0.826539	0.906937	0.749835	0.999971	1	0.961064
Ankrd27	Q3UMR0-3	-0.58	-0.16	-1.08	-0.39	-0.34	0.07	-0.61	-0.37	-0.53	0.02	-0.31	-0.73	-0.36	-0.14	-0.78	-0.07	0.24	0.165	0.215	0.373654	0.546464	0.437828	0.999971	1	0.882419
Ankrd28	Q505D1	-0.26	-0.14	0.03	0.05	-0.41	-0.22	0.22	-0.16	-0.12	0.15	0.03	0.05	-0.25	-0.33	-0.12	-0.26	-0.0625	0.1075	-0.16	0.761217	0.538851	0.371007	0.999971	1	0.869526
Ankrd29	D3YTU5	-0.62	-0.99	-0.56	-0.65	-1.11	-1.44	-1.46	-0.82	-1.76	-1.21	-1.06	-1.23	-1.54	-1.21	-0.6	-0.85	-0.5025	-0.61	-0.345	0.047167	0.0210521	0.198035	0.999971	1	0.813335
Ankrd33b	Q3U0L2	0.5	-0.25	-0.3	-0.15	-0.82	-0.05	-0.53	-0.55	-1.03	0.24	-0.07	-0.69	-0.62	-0.77	-0.94	-0.39	-0.4375	-0.3375	-0.63	0.127157	0.334803	0.0302136	0.999971	1	0.678474
Ankrd34a	B2RW11	1.91	0.16	0.45	0	-0.29	-0.02	0.55	-0.21	-0.04	1.53	0.68	0.72	-0.24	-0.29	0.16	0.19	-0.6225	0.0925	-0.675	0.187844	0.854535	0.143563	0.999971	1	0.788654
Ankrd34b	Q3UUF8	0.25	0.11	0.89	0.2	0.34	0.2	0.24	1.14	0.05	0.54	1.35	1.5	0.51	0.18	1.43	0.83	0.1175	0.4975	0.375	0.691374	0.20717	0.263785	0.999971	1	0.842533
Ankrd40	Q5SUE8-2	0.91	0.15	1.07	0.73	0.1	-0.07	0.24	0.92	-0.08	0.59	0.82	1.07	0.22	0.63	0.7	1.34	-0.4175	-0.115	0.0075	0.191743	0.720153	0.980794	0.999971	1	0.99925
Ankrd44	E9QNQ2	0.25	0.78	-0.23	-0.44	0.43	0.4	-0.04	0.1	0.72	0.31	0.37	0.3	1.03	0.86	-0.33	-0.19	0.1325	0.335	0.2525	0.662935	0.278155	0.553092	0.999971	1	0.913595
Ankrd45	Q810N6	0.48	0.95	0.55	0.73	0.09	0.92	0.28	0.94	1.08	1.22	0.95	0.97	0.75	1.13	1.13	1.45	-0.12	0.3775	0.4375	0.651444	0.0696265	0.0748571	0.999971	1	0.746958
Ankrd46	Q8BTZ5	1.02	0.45	0.47	1.72	0.07	0.47	0.38	2.24	-0.11	1.58	0.5	0.3	0.13	1.02	1.67	2.21	-0.125	-0.3475	0.3425	0.813586	0.440833	0.499314	0.999971	1	0.903717
Ankrd49	Q8VE42	-0.49	0.83	0.73	-0.46	1.17	0.44	0.64	0.58	0.81	-0.09	0.61	0.42	1.38	-0.19	0.3	-0.12	0.555	0.285	0.19	0.171297	0.477408	0.692608	0.999971	1	0.947174
Ankrd50	F7BE84	0.46	-0.24	0.1	0.13	-0.5	-0.67	0.15	0.38	-0.06	0.2	0.67	0.71	-0.4	-0.63	0.48	0.38	-0.2725	0.2675	-0.155	0.37339	0.314824	0.626445	0.999971	1	0.930479
Ankrd52	Q8BTI7	-1.37	-0.36	-0.25	-0.85	-0.2	-0.3	1.12	4.43	-0.25	-1.25	1.02	0.44	0.4	0	-0.59	0.68	1.97	0.6975	0.83	0.078228	0.197246	0.0470504	0.999971	1	0.710102
Ankrd54	Q91WK7	-0.29	-0.66	-0.06	0.42	-0.49	-0.32	-0.01	0.33	-0.72	0.51	-0.54	0.15	-1.1	-0.38	-0.4	0.01	0.025	-0.0025	-0.32	0.933146	0.994436	0.338229	0.999971	1	0.859348
Ankrd63	A2ARS0	0.19	-0.51	-1.22	-0.27	-0.59	-1.71	-1.39	-0.27	-0.66	-0.46	-1.63	-0.57	-0.34	-0.52	-0.42	-1.19	-0.5375	-0.3775	-0.165	0.225331	0.340988	0.637345	0.999971	1	0.93301
Anks1	A0A3B2WAQ7	-1	-0.47	0.31	0.2	-0.22	-0.05	-0.34	0.28	-0.19	-0.51	0.3	0.08	-0.06	-0.27	0.26	0.33	0.1575	0.16	0.305	0.638331	0.647059	0.375061	0.999971	1	0.870465
Anks1b	A0A0R4J2A2	0.55	-0.39	0.29	0.29	-0.16	-0.43	0.8	-0.06	0.02	0.87	1.72	2.72	-0.47	-0.05	-0.09	0	-0.1475	1.1475	-0.3375	0.658614	0.0686909	0.207751	0.999971	1	0.820739
Anks1b_1	A0A0R4J2A6	-6.14	-2.21	-0.63	-3.43	-0.59	-2.29	0.25	-2.39	0.5	-5.26	-0.27	-0.1	1.27	-2.14	-1.81	-3.39	1.8475	1.82	1.585	0.145172	0.268611	0.261832	0.999971	1	0.842262
Anks1b_2	S4R286	-0.37	-0.82	-0.43	-0.8	-0.7	-0.58	-0.61	-0.5	-0.79	-0.83	-0.41	-0.41	-0.07	-0.79	-0.53	-0.59	0.0075	-0.005	0.11	0.968772	0.981132	0.636716	0.999971	1	0.93301
Anks1b_3	S4R1Q0	-1.97	-2.27	-1.76	-1.83	-2.33	-2.04	-1.98	-2.1	-2.03	-1.73	-1.36	-1.24	-1.65	-2.26	-1.37	-1.1	-0.155	0.3675	0.3625	0.44003	0.154599	0.227372	0.999971	1	0.828563
Anks1b_4	S4R2Q2	-4.94	-9.14	-4.99	-5.26	-8.56	-5.58	-5.44	-6.44	-7.76	-5.95	-5.06	-7.58	-10.48	-5.1	-6.42	-6.01	-0.4225	-0.505	-0.92	0.705022	0.644365	0.514719	0.999971	1	0.905815
Anks3	A0A2R8VHN6	1.79	0.66	1.32	2.21	-0.06	0.77	0.99	0.5	-0.07	0.73	1.56	1.72	-0.48	-0.07	1.76	1.24	-0.945	-0.51	-0.8825	0.034984	0.317918	0.150202	0.999971	1	0.793248
Ankzf1	J3QM81	0.72	0.53	1.6	3.4	0.47	-0.17	0.82	2.01	0.14	0.84	2.97	2.14	0.16	0.88	1.77	3.03	-0.78	-0.04	-0.1025	0.295992	0.961315	0.899311	0.999971	1	0.989654
Anln	Q8K298	-0.21	-0.33	-0.8	-1.13	-0.48	-0.35	-1.61	-1.91	-0.62	-0.32	-1.38	-1.32	-0.79	-0.37	-0.9	-1.78	-0.47	-0.2925	-0.3425	0.284919	0.393561	0.351339	0.999971	1	0.867656
Ano10	Q8BH79-2	-1.17	-0.14	-0.63	-0.75	-0.15	0.31	-0.82	-0.74	0.23	-0.22	-0.62	-0.63	0.15	-0.07	-0.87	-0.45	0.3225	0.3625	0.3625	0.351854	0.248733	0.265964	0.999971	1	0.842677
Ano3	A2AHL1	-0.82	-1.1	0.89	0.07	-1.02	-1.23	0.17	0.3	-1.29	-1.14	0.49	0.34	-1.56	-0.8	0.25	0.17	-0.205	-0.16	-0.245	0.711044	0.790035	0.670154	0.999971	1	0.938809
Ano6	A0A2I3BPX3	-1.4	-1.34	-1.3	-1.1	-0.69	-1.53	-1.19	-1.31	-0.78	-1.78	-1.04	-0.57	-0.55	-1.23	-1.11	-1.42	0.105	0.2425	0.2075	0.647495	0.404088	0.387336	0.999971	1	0.871816
Ano8	A0A1L1SR96	-0.03	-0.08	-0.12	-0.27	-0.61	-0.1	-0.36	-0.28	-0.41	0.1	-0.4	-0.44	-0.17	-0.02	-0.14	-0.13	-0.2125	-0.1625	0.01	0.275338	0.41665	0.952037	0.999971	1	0.998056
Anp32a	D3Z7M9	2.06	3.11	2.02	2.56	3.4	2.72	2.33	2.2	3.83	2.51	1.97	2.01	3.91	2.42	1.91	1.99	0.225	0.1425	0.12	0.538829	0.763393	0.807944	0.999971	1	0.973362
Anp32b	Q9EST5	0.46	1.29	2.71	2.05	2.03	0.62	2.27	2.15	1.12	0.51	2.47	3.05	1.42	1.14	2.9	2.15	0.14	0.16	0.275	0.805438	0.817683	0.633909	0.999971	1	0.93301
Anp32e	P97822-2	1.34	2.93	2.97	2.62	2.73	2.64	2.47	2.92	2.52	2.06	3.11	2.98	1.72	2.55	3.23	2.51	0.225	0.2025	0.0375	0.558126	0.638491	0.935163	0.999971	1	0.995618
Anpep	P97449	0.37	-0.07	-0.16	0.61	0.71	-0.43	-0.18	-1	0.39	0.12	-0.25	0.41	-0.73	0.35	0.8	0.24	-0.4125	-0.02	-0.0225	0.299888	0.938689	0.950363	0.999971	1	0.998038
Antkmt	Q501J2	-0.55	-0.39	-0.32	-1.01	-0.41	-1.07	-0.88	-0.97	-0.65	-0.77	-1.42	-0.13	-0.45	-0.38	-0.71	-0.31	-0.265	-0.175	0.105	0.29379	0.577566	0.638115	0.999971	1	0.93301
Antxr1	Q9CZ52	-0.76	-0.67	-1.15	-2.68	-0.18	-0.78	-0.92	-2.69	-0.49	-1.35	-1.73	-0.26	-0.83	-1.09	-1.95	-2.86	0.1725	0.3575	-0.3675	0.790322	0.512637	0.543851	0.999971	1	0.911398
Anxa1	P10107	1.92	1.05	-0.29	1.3	2.1	0.39	0.4	-0.38	0.89	0.94	-0.25	1.3	-0.2	0.56	0.39	-0.19	-0.3675	-0.275	-0.855	0.567521	0.607963	0.0979651	0.999971	1	0.78268
Anxa11	P97384	-0.91	-0.04	-0.07	0.06	-0.07	-0.03	-0.22	-0.33	-0.54	-0.85	-0.4	-0.37	-0.05	-0.66	-0.5	-0.26	0.0775	-0.3	-0.1275	0.765398	0.281717	0.6492	0.999971	1	0.933842
Anxa2	P07356	1.11	0.06	-0.39	0.72	1.61	0.21	-0.3	-0.69	0.27	0.84	-0.62	0.08	-0.34	0.5	0.32	-0.39	-0.1675	-0.2325	-0.3525	0.762876	0.589561	0.376843	0.999971	1	0.870465
Anxa3	O35639	-0.02	-0.23	0.02	0.81	0.47	-0.5	-0.07	-0.18	-0.13	0.06	0.18	0.86	-0.52	-0.06	0.6	0.4	-0.215	0.0975	-0.04	0.493887	0.758639	0.905412	0.999971	1	0.991091
Anxa4	P97429	-0.37	0.7	-0.57	-0.33	1.34	0.14	-0.67	-0.65	0.44	-0.68	-0.74	0.2	-0.24	0.25	-0.11	-0.52	0.1825	-0.0525	-0.0125	0.721655	0.895161	0.969575	0.999971	1	0.998787
Anxa5	P48036	-0.89	-0.55	-1.01	-1.03	-0.23	-0.32	-0.99	-1.43	-0.81	-1.01	-1.28	-0.8	-0.7	-0.26	-0.95	-0.98	0.1275	-0.105	0.1475	0.682952	0.61425	0.53646	0.999971	1	0.910077
Anxa6	F8WIT2	-1.42	-1.61	-3.98	-4.09	-2.72	-2.74	-3.58	-3.63	-1.95	-1.32	-3.39	-4.42	-1.76	-1.83	-4	-3.52	-0.3925	0.005	-0.0025	0.576916	0.995615	0.997608	0.999971	1	1
Anxa6_1	P14824	-1.22	-1.34	-1.5	-1.88	-1.07	-0.99	-1.15	-1.76	-1.17	-0.95	-1.41	-1.61	-1.28	-1.07	-1.6	-1.91	0.2425	0.2	0.02	0.351201	0.405536	0.938282	0.999971	1	0.99575
Anxa7	Q07076	-0.43	-0.5	-0.45	-1.02	-0.47	-0.09	-0.33	-0.77	-0.46	-0.55	-0.48	-0.73	-0.74	-0.72	-0.46	-1.27	0.185	0.045	-0.1975	0.439764	0.825634	0.437353	0.999971	1	0.882419
Aoc3	O70423-2	0.56	0.18	-1.99	0.37	5	1.14	-0.13	-1.32	1.02	3.84	0.75	2.97	-2.35	0.65	-1.68	-1.35	1.3925	2.365	-0.9625	0.30938	0.022113	0.243509	0.999971	1	0.837316
Aox1	G3X8P9	-0.64	1.15	0.69	0.8	0.26	0.94	0.72	0.88	0.3	0.13	0.63	1.84	0.47	0.82	0.55	1.06	0.2	0.225	0.225	0.621535	0.661808	0.575197	0.999971	1	0.91816
Ap1b1	Q5SVG5	-0.92	-0.42	-0.23	-0.41	-0.54	-0.66	0.05	-0.45	-0.65	-0.9	-0.26	-0.24	-0.92	-0.45	-0.42	-0.54	0.095	-0.0175	-0.0875	0.699668	0.943175	0.702241	0.999971	1	0.949019
Ap1g1	Q8CBB7	0	0.93	-0.02	-0.15	0.59	0.84	-0.07	-0.19	0.82	0.56	0.18	-0.02	0.85	0.75	-0.02	0.14	0.1025	0.195	0.24	0.768381	0.54072	0.474328	0.999971	1	0.894044
Ap1m1	P35585	-0.49	0.26	-0.23	-0.14	0.26	0	-0.03	-0.07	0.16	-0.22	-0.21	0.11	0.45	0.02	-0.36	-0.03	0.19	0.11	0.17	0.393637	0.625713	0.50961	0.999971	1	0.905815
Ap1s1	P61967	-0.04	0.39	0.9	0.41	-0.1	0.46	0.51	0.72	0.15	0.08	0.95	0.68	-0.1	0.46	1.34	0.69	-0.0175	0.05	0.1825	0.949521	0.864964	0.60421	0.999971	1	0.924454
Ap1s2	Q9DB50	0.38	0.66	0.07	0.46	0.48	0.48	-0.37	0.82	0.81	0.34	0.02	0.3	0.57	1.04	0.47	0.69	-0.04	-0.025	0.3	0.891263	0.915747	0.195449	0.999971	1	0.811225
Ap2a1	P17426-2	-0.74	-0.29	-0.61	-0.76	-0.52	-0.38	-0.57	-0.73	-0.57	-0.61	-0.71	-0.97	-0.18	-0.46	-0.46	-0.65	0.05	-0.115	0.1625	0.796822	0.563051	0.43155	0.999971	1	0.881643
Ap2a2	P17427	-1.2	-0.77	-1.03	-1.12	-0.75	-1.01	-1.02	-1.25	-0.73	-1.23	-1.15	-1.42	-0.63	-1.08	-1	-1.05	0.0225	-0.1025	0.09	0.909573	0.637049	0.654305	0.999971	1	0.934061
Ap2b1	Q9DBG3	-0.81	-0.66	-0.76	-0.89	-0.85	-0.71	-0.7	-0.86	-0.84	-1.01	-0.8	-0.85	-0.57	-0.73	-0.57	-0.64	1.96262e-16	-0.095	0.1525	1	0.565129	0.37125	1	1	0.869526
Ap2m1	A0A338P6T4	1.39	0.7	2.77	1.05	-0.62	2.15	1.44	1.83	-0.44	-0.1	0.73	-0.18	-0.91	1.29	1.67	2.03	-0.2775	-1.475	-0.4575	0.691687	0.0136453	0.532391	0.999971	1	0.910069
Ap2m1_1	P84091	-0.18	-0.57	-0.7	-0.74	-0.71	-0.32	0.28	-0.98	-0.74	-0.43	-1.16	-1.37	-0.63	-0.38	-0.84	-0.96	0.115	-0.3775	-0.155	0.709528	0.179976	0.493728	0.999971	1	0.901531
Ap2s1	P62743	-2.27	-0.24	-0.8	-3.14	-0.37	-0.86	-0.53	-2.1	-0.35	-2.89	-0.39	-0.11	0.05	-1.58	-1.15	-3.25	0.6475	0.6775	0.13	0.365594	0.430501	0.879221	0.999971	1	0.985441
Ap3b1	Q9Z1T1	0.86	0.02	-0.06	0.01	0.28	0.28	-0.3	0.09	0.2	0.57	-0.2	-0.08	-0.49	0.12	-0.15	-0.3	-0.12	-0.085	-0.4125	0.664026	0.768715	0.155849	0.999971	1	0.796008
Ap3b2	Q9JME5	-0.9	-1.09	-1.03	-0.92	-1.18	-0.74	-1.02	-0.91	-1	-0.95	-0.85	-0.92	-1.05	-0.75	-0.9	-0.53	0.0225	0.055	0.1775	0.900957	0.731923	0.36097	0.999971	1	0.869526
Ap3d1	O54774	-1.21	-0.51	-0.97	-1.18	-0.33	-0.41	-0.77	-0.88	-0.2	-1.32	-0.63	-0.71	0.31	-0.63	-0.71	-1.02	0.37	0.2525	0.455	0.15188	0.397397	0.190995	0.999971	1	0.810547
Ap3m1	Q9JKC8	-1.36	-0.65	-0.5	-0.52	-1.01	-0.78	-0.71	-0.28	-0.84	-1.03	-0.63	-0.78	-0.89	-0.58	-0.42	-0.23	0.0625	-0.0625	0.2275	0.818773	0.800338	0.405811	0.999971	1	0.874911
Ap3m2	Q8R2R9	-0.87	-0.15	-0.4	-0.57	-0.28	0.09	-0.15	-0.46	-0.31	-0.54	-0.3	-0.83	-0.09	-0.02	-0.51	-0.44	0.2975	0.0025	0.2325	0.215725	0.991345	0.331521	0.999971	1	0.857152
Ap3s1	Q9DCR2	-1.34	-0.87	-0.63	-0.91	-0.42	-1.3	-0.69	-0.67	-0.16	-1.54	-0.55	-0.49	0	-1.18	-0.69	-0.32	0.1675	0.2525	0.39	0.526333	0.453515	0.218483	0.999971	1	0.827064
Ap3s2	Q8BSZ2	-1.21	-0.4	-1.11	-1.79	-0.42	-0.35	-0.83	-1.06	-0.41	-1.22	-0.78	-0.99	0.52	-0.19	-1.12	-1.18	0.4625	0.2775	0.635	0.185668	0.412512	0.195641	0.999971	1	0.811225
Ap4b1	A0A0G2JFY6	-1.53	-0.25	-0.26	-0.14	-0.22	-0.24	-0.27	0.17	-0.37	-1.09	-0.52	0.04	-0.4	0.17	-0.07	0.74	0.405	0.06	0.655	0.254852	0.877449	0.122146	0.999971	1	0.78268
Ap4e1	Q80V94	0.15	0.52	0.02	-0.21	0.59	0.6	-0.16	-0.46	0.17	0.31	-0.08	-0.19	1.14	1.07	-0.13	-0.29	0.0225	-0.0675	0.3275	0.94264	0.766837	0.415974	0.999971	1	0.876885
Ap4m1	Q9JKC7	1.95	0.88	0.19	-0.06	0.4	0.89	-0.73	-0.07	0.57	1.26	0.28	-0.04	0.71	0.7	-0.12	0.11	-0.6175	-0.2225	-0.39	0.256927	0.653466	0.411363	0.999971	1	0.875847
Ap4s1	Q9WVL1	-1.15	-1.61	-1.99	-0.74	-0.22	-1.82	-2.1	-0.67	-0.99	-0.88	-1.05	-0.63	-0.18	-0.66	-1.32	-1.09	0.17	0.485	0.56	0.728804	0.128662	0.148123	0.999971	1	0.793248
Ap5s1	A2ANC4	0.75	2.34	2.46	2.48	1.27	0.96	1.69	2.31	1.22	0.11	2.5	2.31	2.24	1.69	2.56	3.51	-0.45	-0.4725	0.4925	0.357993	0.464179	0.360478	0.999971	1	0.869526
Ap5z1	Q3U829	0.65	1.09	-0.04	-0.13	1.61	0.44	-0.18	-0.02	1.21	0.97	-0.06	0.19	2.16	0.37	-0.19	0.07	0.07	0.185	0.21	0.880404	0.648011	0.707136	0.999971	1	0.950182
Apaf1	G3XA09	0.88	0.29	1.76	0.12	1.38	0.68	1.08	0.88	0.63	1.1	1.11	0.32	0.96	1.22	1.39	-0.04	0.2425	0.0275	0.12	0.532724	0.945161	0.794042	0.999971	1	0.970141
Apba1	B2RUJ5	-0.76	-0.99	-0.75	-0.25	-0.72	-0.84	-0.23	-0.77	-0.82	-0.57	-0.7	-0.72	-0.73	-0.93	-0.76	-0.51	0.0475	-0.015	-0.045	0.843835	0.94315	0.839449	0.999971	1	0.979728
Apba2	P98084	0.07	-0.23	-0.52	-0.51	-0.37	-0.22	-0.51	-0.66	-0.52	-0.15	-0.94	-1.1	-0.02	-0.07	-0.82	-0.65	-0.1425	-0.38	-0.0925	0.513614	0.187308	0.730041	0.999971	1	0.956041
Apba3	O88888	-0.17	-0.29	-0.45	-0.16	-0.24	-0.33	-0.5	-0.15	-0.92	0.03	-0.37	-0.73	-0.07	0.01	-0.21	-0.31	-0.0375	-0.23	0.1225	0.834929	0.364443	0.500932	0.999971	1	0.904237
Apbb1	Q9QXJ1	0.19	-1.16	-1.04	-0.87	-0.7	-0.84	-0.74	-0.62	-1	-0.53	-0.89	-1.34	-0.29	-0.42	-0.41	-0.5	-0.005	-0.22	0.315	0.987357	0.530005	0.333368	0.999971	1	0.857921
Apbb1ip	Q8R5A3	2.21	0.06	0.47	-0.01	0.4	0.35	-0.2	0.12	0.57	2.21	0.37	0.11	-0.91	-0.12	0.72	0.78	-0.515	0.1325	-0.565	0.316785	0.83691	0.358524	0.999971	1	0.86927
Apbb2	E9PWH3	0.55	-0.5	0.25	0.55	-0.25	-0.33	0.84	1.28	-0.22	-0.33	0.27	-0.18	0.17	-0.38	0.9	0.78	0.1725	-0.3275	0.155	0.697977	0.278608	0.680369	0.999971	1	0.942957
Apc	B2RUG9	0.09	-0.63	-0.62	-0.81	-0.58	-0.81	-0.25	-0.58	-0.4	-0.35	-0.38	-0.17	-0.28	-0.96	-0.44	-0.87	-0.0625	0.1675	-0.145	0.806863	0.486745	0.602203	0.999971	1	0.924453
Apc2	G5E832	1.2	-0.54	-0.58	-0.48	-0.42	-0.1	-0.58	-0.28	-0.38	0.94	-0.48	-0.69	-0.11	-0.06	-0.67	-0.52	-0.245	-0.0525	-0.24	0.565451	0.92081	0.583725	0.999971	1	0.920364
Apeh	A0A0R4J107	1.08	0.1	0.15	0.54	-0.01	0.01	0.22	0.26	0.09	0.49	0.22	0.43	0.25	0.56	0.64	0.48	-0.3475	-0.16	0.015	0.204689	0.549698	0.954701	0.999971	1	0.998056
Apex1	P28352	1.75	2.75	2.72	2.38	2.39	2.9	2.4	2.53	2.6	2.29	2.3	2.35	2.31	2.77	2.96	2.51	0.155	-0.015	0.2375	0.579866	0.954593	0.416776	0.999971	1	0.877251
Aph1b	F8WHK7	-0.45	-0.27	-0.2	-2.05	-0.13	-0.11	0.04	-0.18	0.11	-0.37	-0.82	-1.11	-3.23	0.06	-0.51	-0.29	0.6475	0.195	-0.25	0.148257	0.686248	0.751141	0.999971	1	0.961064
Api5	O35841	1.21	1.7	1.82	2.05	1.85	1.38	1.47	1.83	1.56	1.21	1.51	1.72	1.31	1.8	1.61	1.87	-0.0625	-0.195	-0.0475	0.798866	0.421773	0.847645	0.999971	1	0.980635
Apip	Q9WVQ5	0.12	1.21	0.71	0.6	1.24	0.73	0.56	0.62	1.65	0.1	0.78	0.32	1.5	0.9	0.78	0.97	0.1275	0.0525	0.3775	0.656832	0.893885	0.211982	0.999971	1	0.823181
Aplf	Q9D842-2	3.14	1.84	2.93	3.57	1.39	1.88	3.23	2.89	3.17	3.09	2.42	2.42	-1.87	0.77	3.2	1.3	-0.5225	-0.095	-2.02	0.330897	0.814151	0.0678103	0.999971	1	0.733937
Aplp1	Q03157	2.93	1.1	1.04	1.37	1.06	1.31	3.1	0.83	1.16	1.89	1.01	0.85	1.05	0.76	0.98	0.61	-0.035	-0.3825	-0.76	0.955062	0.425283	0.106421	0.999971	1	0.78268
Aplp2	Q60709	-0.19	-0.01	-0.17	-0.36	0.08	-0.03	-0.16	-0.32	0.27	-0.08	0.03	0.05	-0.02	-0.08	-0.13	-0.14	0.075	0.25	0.09	0.686333	0.183035	0.602021	0.999971	1	0.924453
Aplp2_1	Q06335	-2.02	-1.44	-0.25	1.05	-0.8	-1.28	-0.36	1.41	-1.97	-1.55	0.31	1.47	-2.35	-0.84	0.27	1.41	0.4075	0.23	0.2875	0.615882	0.808643	0.760495	0.999971	1	0.961116
Apmap	Q9D7N9	-0.49	-0.55	-0.69	-0.54	-0.59	-0.42	-0.67	-0.46	-0.64	-0.83	-0.55	-0.44	-0.49	-0.43	-0.48	-0.44	0.0325	-0.0475	0.1075	0.847468	0.784267	0.513414	0.999971	1	0.905815
Apoa1	Q00623	2.07	4.13	1.44	4.79	5.06	1.45	3.51	-0.29	2.62	1.46	3.26	3.15	3.93	2.41	2.54	2.59	-0.675	-0.485	-0.24	0.595227	0.556292	0.761959	0.999971	1	0.961309
Apoa2	P09813	4.48	2.64	0.48	3.24	3.99	-0.02	1.41	-2.31	1.4	2.09	1.38	1.54	-0.68	-0.11	1.09	1.06	-1.9425	-1.1075	-2.37	0.184928	0.176739	0.0199367	0.999971	1	0.635388
Apoa4	P06728	2.83	3.86	1.55	4.98	4.55	1.59	3.66	2.37	1.1	0.33	1.62	1.06	0.63	1.53	1.67	1.73	-0.2625	-2.2775	-1.915	0.766267	0.010326	0.0220963	0.999971	1	0.649631
Apob	E9Q1Y3	2.09	2.41	1.4	1.52	2.62	-1.09	0.81	1.51	0.29	1.83	1.58	1.96	2.06	-0.54	1.85	2.29	-0.8925	-0.44	-0.44	0.244382	0.31955	0.495765	0.999971	1	0.901531
Apoc1	P34928	-0.74	2.52	1.11	3.34	3.48	-0.48	2.9	-1.28	1.47	-0.1	3.6	2.58	2.31	0.29	2.2	1.22	-0.4025	0.33	-0.0525	0.761228	0.758728	0.953759	0.999971	1	0.998056
Apoc3	E9QP56	-0.6	1.72	1.35	4.09	1.9	-0.28	2.46	-0.89	0.94	0.12	2.79	2.24	1.84	-0.28	1.91	2.29	-0.8425	-0.1175	-0.2	0.460342	0.908459	0.84227	0.999971	1	0.979814
Apod	P51910	0.89	0.66	0.64	1.56	0.62	1.08	0.3	1.87	0.62	1.04	0.92	0.77	0.22	1.2	1.05	1.7	0.03	-0.1	0.105	0.938213	0.697864	0.774475	0.999971	1	0.963884
Apoe	P08226	0.3	1.32	1.02	0.67	1.3	1.19	1.14	0.57	1.8	0.78	1.52	1.47	1.06	1.03	0.8	0.8	0.2225	0.565	0.095	0.446436	0.0986361	0.712719	0.999971	1	0.951793
Apoh	Q01339	0.72	2.24	0.57	3.31	2.89	1.5	2.03	0.88	1.63	0.91	2.04	1.99	1.8	1.6	1.15	2.33	0.115	-0.0675	0.01	0.870288	0.916328	0.987425	0.999971	1	0.99925
Apoo	Q9DCZ4-2	-1.98	-2.83	-0.47	-0.61	-2.73	-2.57	-0.92	-0.64	-2.46	-2.52	-0.55	-0.33	-2.8	-2.57	-0.46	-0.48	-0.2425	0.0075	-0.105	0.733049	0.991955	0.891642	0.999971	1	0.988225
Apool	Q78IK4	-0.49	-0.71	-0.1	-0.44	-0.35	-0.45	0.66	-0.15	-0.47	-0.6	-0.48	-0.18	-0.68	-0.76	-0.43	-0.72	0.3625	0.0025	-0.2125	0.235999	0.990245	0.311277	0.999971	1	0.848125
App	P12023-2	-1.59	-2.41	0.91	0.75	-1.66	-2.61	1.25	0.64	-2.58	-0.82	1.71	0.57	-2.77	-2.23	2.55	2.24	-0.01	0.305	0.5325	0.992769	0.785177	0.71647	0.999971	1	0.952576
App_1	A0A2I3BQZ9	0.56	0.8	0.53	0.44	0.58	0.68	0.62	0.41	0.73	0.55	0.6	0.63	0.67	0.81	0.59	0.49	-0.01	0.045	0.0575	0.955155	0.791856	0.751667	0.999971	1	0.961116
Appbp2	Q9DAX9	-0.93	0.58	2.23	1.8	0.44	0.46	2.48	1.88	-0.13	-0.5	1.48	-1.41	1.12	0.14	1.3	0.57	0.395	-1.06	-0.1375	0.618214	0.228913	0.841128	0.999971	1	0.979814
Appl1	Q8K3H0	0.51	0.42	0.27	0.2	0.4	0.36	0.46	0.43	0.52	0.51	0.44	0.35	0.39	0.28	0.19	0.35	0.0625	0.105	-0.0475	0.71314	0.537395	0.784531	0.999971	1	0.966376
Appl2	Q8K3G9	-0.79	-0.46	-0.88	-0.96	-0.43	-0.59	-0.89	-0.93	-0.47	-0.81	-0.73	-0.77	-0.1	-0.6	-0.7	-0.55	0.0625	0.0775	0.285	0.768568	0.689333	0.213986	0.999971	1	0.825334
Aprt	P08030	0.49	0.5	0.62	0.64	0.28	0.43	0.51	0.58	0.3	0.44	0.38	0.15	0.21	0.91	0.24	0.63	-0.1125	-0.245	-0.065	0.513648	0.165323	0.766219	0.999971	1	0.962472
Aptx	Q7TQC5-4	-0.34	3.06	2.36	1.3	2.46	2.3	2.03	1.84	2.22	-0.14	1.8	1.72	2.64	2.29	1.87	2.03	0.5625	-0.195	0.6125	0.418065	0.812165	0.384068	0.999971	1	0.871816
Aqp1	Q02013	0.93	2.12	1.96	1.73	0.5	1.54	1.06	1.81	0.5	-0.12	-1.58	0.29	-0.35	1.73	0.43	1.2	-0.4575	-1.9125	-0.9325	0.245375	0.00420649	0.0838478	0.999971	0.969702	0.755254
Aqp11	A0A0X1KG63	1.88	1.68	3.23	2.36	1	1.98	1.87	3.25	1.05	1.03	2.56	2.11	1.16	1.95	2.38	2.65	-0.2625	-0.6	-0.2525	0.624175	0.235555	0.575293	0.999971	1	0.91816
Aqp4	A0A5F8MQ17	-2.42	-2.78	-0.59	-1.16	-1.24	-1.53	-1.13	-2.21	-0.96	-1.08	-0.94	-1.79	1.63	-1.16	-0.47	-0.87	0.21	0.545	1.52	0.691074	0.306291	0.0651938	0.999971	1	0.727266
Aqp4_1	A0A0R4J0Z3	-0.95	-0.7	-0.42	-0.75	-0.99	-0.49	-0.79	-1.67	-0.52	-0.07	-0.59	-0.58	-0.36	-0.18	-0.08	-0.25	-0.28	0.265	0.4875	0.341597	0.230855	0.0295107	0.999971	1	0.678474
Aqr	Q8CFQ3	0.93	1.08	0.34	0.45	1.16	0.55	0.05	0.24	0.87	0.93	0.25	0.52	0.69	1.06	-0.2	0.55	-0.2	-0.0575	-0.175	0.521402	0.825968	0.590292	0.999971	1	0.922217
Araf	P04627	0.8	0.41	0.51	1.23	0.28	0.86	2.05	1.3	0.55	1.03	0.69	0.04	0.95	1.05	1.03	1.22	0.385	-0.16	0.325	0.346476	0.581058	0.183402	0.999971	1	0.809025
Araf_1	Q8CAD1	0.5	0.36	1.15	0.6	0.1	1.52	0.45	2.01	0.45	1.69	1.12	-0.58	1.26	1.7	-0.37	0.76	0.3675	0.0175	0.185	0.423406	0.971116	0.682296	0.999971	1	0.943204
Arap1	Q4LDD4-2	0.71	0.76	-0.02	-0.06	0.43	0.5	-0.5	-0.28	0.52	0.49	-0.19	-0.03	0.73	0.64	-0.06	-0.24	-0.31	-0.15	-0.08	0.366331	0.615466	0.809416	0.999971	1	0.973762
Arap2	E9QP44	-0.35	-0.49	-0.3	-0.44	-0.4	-0.24	0.03	-0.35	-0.4	-0.07	0.05	0.09	0.04	-0.24	-0.09	0.25	0.155	0.3125	0.385	0.403954	0.119166	0.0639076	0.999971	1	0.725348
Arc	Q9WV31	-0.85	-1.04	-0.53	-0.25	-0.76	-0.43	-0.31	-0.38	-1.63	-1.12	-1.19	-2.02	-1.6	-0.77	-0.9	-0.72	0.1975	-0.8225	-0.33	0.411977	0.0172589	0.263372	0.999971	1	0.842533
Arcn1	Q5XJY5	1.19	1.36	1.37	1.42	1.58	1.26	1.38	1.51	1.56	1.11	1.32	1.54	1.87	1.22	1.4	1.32	0.0975	0.0475	0.1175	0.579029	0.796855	0.573173	0.999971	1	0.91816
Arel1	Q8CHG5	-0.99	-0.83	-0.73	-0.39	-0.43	-0.89	-0.97	-0.17	-0.7	-1.03	-0.34	-0.74	-0.29	-0.3	0.11	-0.38	0.12	0.0325	0.52	0.639239	0.886009	0.0368161	0.999971	1	0.700096
Arf1	P84078	-0.29	0.35	0.63	0.67	0.23	0.15	-0.11	0.63	0.05	-0.1	0.58	0.79	-0.13	0.24	0.79	1.11	-0.115	-0.01	0.1625	0.686394	0.974313	0.644036	0.999971	1	0.93301
Arf2	Q8BSL7	0.38	2.98	1.37	3	0.74	2.89	1.14	2.49	1.61	0.96	0.41	2.65	2.91	3.33	2.83	3	-0.1175	-0.525	1.085	0.87451	0.478586	0.0965131	0.999971	1	0.78268
Arf4	P61750	-0.04	0.23	0.87	0.79	0.09	0.29	0.02	0.62	0.25	0.34	1	1.19	0.32	0.25	0.78	0.45	-0.2075	0.2325	-0.0125	0.45801	0.478056	0.962993	0.999971	1	0.998721
Arf5	P84084	-0.99	-0.81	-0.47	-0.27	-0.64	-0.57	-0.43	-0.03	-0.54	-0.99	0.08	-0.25	-0.43	-0.37	-0.05	0.65	0.2175	0.21	0.585	0.382447	0.475748	0.0814719	0.999971	1	0.755254
Arf6	P62331	0.79	-0.11	0.43	0.35	-0.1	0.15	-0.18	0.19	-0.44	0.26	0.21	0.02	-0.75	-0.16	0.4	0.53	-0.35	-0.3525	-0.36	0.16859	0.205016	0.309497	0.999971	1	0.847402
Arfgap1	V9GXM1	-0.95	-0.89	-1.34	-1.38	-1	-0.83	-1.01	-1.19	-0.99	-0.88	-1.17	-1.4	-0.2	-0.54	-1.19	-1.25	0.1325	0.03	0.345	0.519475	0.888841	0.262674	0.999971	1	0.842381
Arfgap2	Q99K28	0.09	1.39	0.51	-0.28	1.21	1.31	1.11	0.05	1.42	0.48	0.55	0.78	1.36	0.92	0.03	-0.11	0.4925	0.38	0.1225	0.277269	0.355972	0.795121	0.999971	1	0.970361
Arfgap3	A0A0R4J0T8	0.3	0.11	0.1	-0.15	0.17	0.31	0.58	-0.02	0.66	0.21	0.22	0.06	0.47	-0.19	-0.08	-0.2	0.17	0.1975	-0.09	0.423396	0.353751	0.691027	0.999971	1	0.946786
Arfgef1	G3X9K3	-0.24	0.09	0.09	0.18	-0.03	0.14	0.16	0.19	0.27	0.1	0.24	0.1	0.08	0.26	0.45	0.25	0.085	0.1475	0.23	0.641853	0.415737	0.24408	0.999971	1	0.837316
Arfgef2	A2A5R2	1.1	0	0.42	0.21	-0.08	0.17	0.58	0.1	0.07	0.46	0.4	0.4	-0.11	-0.21	0.15	0.04	-0.24	-0.1	-0.465	0.41503	0.713617	0.113589	0.999971	1	0.78268
Arfgef3	Q3UGY8	-0.06	0.47	0.28	0.08	0.3	0.28	0.29	0.16	0.45	0.05	0.28	0.4	0.6	0.35	0.13	0.21	0.065	0.1025	0.13	0.731558	0.610656	0.53689	0.999971	1	0.910077
Arfip1	G5E8V9-2	-0.19	-0.39	-0.93	-0.41	-0.58	-0.09	-0.83	-0.66	-0.66	-0.2	-0.97	-1.03	-0.81	0.04	-0.97	-0.55	-0.06	-0.235	-0.0925	0.81146	0.388319	0.747185	0.999971	1	0.961064
Arfip2	A0A1B0GS63	1.66	0.3	0.41	0.51	-0.03	0.79	0.09	0.66	0.2	1.22	0.35	0.16	0.31	0.39	0.23	0.91	-0.3425	-0.2375	-0.26	0.361634	0.544958	0.461156	0.999971	1	0.89007
Arfrp1	Q8BXL7	0.09	1.01	0.81	0.96	-0.03	0.78	0.58	0.76	0.74	0.2	0.53	0.91	0.55	0.49	1.14	1	-0.195	-0.1225	0.0775	0.514487	0.66062	0.784504	0.999971	1	0.966376
Arg2	O08691	-0.9	-1.01	-1.08	-0.96	-0.68	-2.1	-1.82	-0.55	-0.74	-0.51	-0.99	-0.43	-1.51	-0.78	-1.17	-1.3	-0.3	0.32	-0.2025	0.439462	0.122565	0.348066	0.999971	1	0.86438
Arglu1	Q3UL36	2.7	0.78	0.91	0.94	0.66	0.99	1.55	0.75	0.95	2.04	1.26	0.81	0.83	0.8	0.67	0.93	-0.345	-0.0675	-0.525	0.46648	0.891994	0.247464	0.999971	1	0.839012
Arhgap1	A2AH25	-0.84	-1.34	-0.87	-1.06	-0.52	-1	-0.65	-1.13	-0.75	-0.81	-0.85	-0.83	-1.01	-1.3	-1.11	-0.95	0.2025	0.2175	-0.065	0.379228	0.257112	0.744292	0.999971	1	0.961064
Arhgap1_1	Q5FWK3	0.27	-0.01	-1.39	-0.9	-0.8	-0.5	-1.1	-1.24	-1.04	0.48	-1.04	-1.12	-0.86	-0.35	-0.84	-0.5	-0.4025	-0.1725	-0.13	0.329369	0.735057	0.739899	0.999971	1	0.960899
Arhgap10	Q6Y5D8-3	0.37	0.2	0.5	0.86	0.4	-0.12	0.6	0.76	0.18	-0.46	0.28	-0.55	-0.36	-0.72	-0.23	0.11	-0.0725	-0.62	-0.7825	0.781026	0.0461383	0.0115821	0.999971	1	0.613095
Arhgap12	B2RUJ8	0.6	0.35	0.08	-0.05	0.8	0.65	0.51	-0.06	0.82	-0.01	0.04	0.21	1.05	-0.06	-0.04	-0.4	0.23	0.02	-0.1075	0.388014	0.938831	0.754678	0.999971	1	0.961116
Arhgap17	Q3UIA2-2	-0.61	-1.08	-0.11	0.16	-1.2	-0.71	-0.2	-0.28	-1.42	-0.49	-0.4	-0.37	-1.9	-1.23	-0.16	-0.22	-0.1875	-0.26	-0.4675	0.596519	0.480749	0.333454	0.999971	1	0.857921
Arhgap18	Q8K0Q5	-0.76	0.03	-0.94	0.5	0.25	-0.07	-0.15	-0.86	1.45	-0.51	-0.34	0.42	-0.22	0	0.43	0.51	0.085	0.5475	0.4725	0.829205	0.308335	0.222991	0.999971	1	0.827753
Arhgap20	Q6IFT4	1.76	-0.59	-0.53	0.37	-0.53	0.21	-0.39	0.07	-0.4	1	-0.24	-0.36	-0.59	-0.12	-0.66	0.48	-0.4125	-0.2525	-0.475	0.445445	0.670498	0.40552	0.999971	1	0.874565
Arhgap21	B7ZCJ1	-0.24	-0.5	-0.83	-0.27	-0.49	-0.6	-0.66	-0.81	-0.47	-0.31	-0.67	-0.84	-0.12	-0.65	-0.77	-0.12	-0.18	-0.1125	0.045	0.391949	0.610978	0.856545	0.999971	1	0.98255
Arhgap23	B1AQY2	-0.71	-0.8	-0.99	-0.83	-1	-0.68	-0.45	-1.04	-0.74	-0.57	-0.92	-1.12	-0.45	-0.76	-1.11	-0.87	0.04	-0.005	0.035	0.845634	0.979194	0.864207	0.999971	1	0.983079
Arhgap25	Q8BYW1	-0.44	0.39	0.04	-0.25	-0.05	0.28	0.02	-0.01	-0.34	-0.5	0.46	0.09	-0.27	-0.4	-0.53	-0.12	0.125	-0.0075	-0.265	0.593748	0.979517	0.280235	0.999971	1	0.844318
Arhgap26	F6T836	-0.92	-0.06	-0.3	-0.49	-0.18	-0.31	-0.2	-0.35	0.19	-0.54	-0.06	-0.2	0.15	-0.4	-0.46	-0.38	0.1825	0.29	0.17	0.429228	0.280756	0.512917	0.999971	1	0.905815
Arhgap27	A2AB59	1.1	0.29	0.46	0.03	0.11	0.32	-0.09	0.7	0.16	0.95	-0.08	0.48	-0.23	0.28	0.72	0.37	-0.21	-0.0925	-0.185	0.481585	0.773086	0.551531	0.999971	1	0.913379
Arhgap29	A0A0G2JEY0	-0.86	-1.7	-1.23	-0.48	-1.81	-1.46	-1.44	-0.72	-1.9	-0.87	-1.07	-0.44	-1.2	-1.11	-1.18	-0.61	-0.29	-0.0025	0.0425	0.407073	0.994849	0.88866	0.999971	1	0.987485
Arhgap31	A6X8Z5	0.8	0.06	-0.71	-0.21	0.31	0.61	-0.28	-0.75	0.36	0.34	-0.9	-0.08	0.09	0.32	-0.73	-0.06	-0.0125	-0.055	-0.08	0.975973	0.893689	0.831472	0.999971	1	0.978898
Arhgap32	S4R2G6	1.85	0.4	1.24	1.71	0.84	0.84	1.09	1.76	0.37	1.53	1.3	0.02	1.42	0.66	0.42	1.31	-0.1675	-0.495	-0.3475	0.660239	0.297709	0.386973	0.999971	1	0.871816
Arhgap32_1	Q811P8	0.08	-0.68	-0.87	-0.95	-0.74	-0.55	-0.66	-1.2	-0.62	-0.28	-0.67	-0.66	-0.59	-0.95	-1.04	-0.94	-0.1825	0.0475	-0.275	0.530789	0.860641	0.32976	0.999971	1	0.856787
Arhgap33	A0A140LHW2	-0.81	-1.59	-1.4	-1.32	-1.94	-1.35	-1.19	-1.08	-1.49	-0.54	-1.05	-1.13	-1.24	-1.04	-0.93	-0.74	-0.11	0.2275	0.2925	0.687407	0.415159	0.231544	0.999971	1	0.8307
Arhgap35	Q91YM2	-0.29	-0.53	-0.51	-0.72	-0.62	-0.24	-0.35	-0.65	-0.28	-0.33	-0.47	-0.22	-0.53	-0.52	-0.64	-0.58	0.0475	0.1875	-0.055	0.808477	0.306861	0.756564	0.999971	1	0.961116
Arhgap39	P59281-2	3.43	-1.3	3.22	1.25	1.03	2.38	2.88	0.82	-0.53	3.59	3.11	-2	-2.18	0.95	2.8	2.2	0.1275	-0.6075	-0.7075	0.905703	0.699482	0.61275	0.999971	1	0.927364
Arhgap39_1	H7BX46	0.04	-0.36	-0.3	-0.56	-0.54	-0.19	0.19	-0.46	-0.51	0.03	-0.19	-0.42	-0.08	-0.41	-0.77	-0.49	0.045	0.0225	-0.1425	0.851013	0.917182	0.53789	0.999971	1	0.910077
Arhgap42	B2RQE8	1.22	0.49	-0.32	-0.36	0.13	0.57	-1.21	-0.97	0.49	1.29	-0.71	0.2	-0.06	0.41	-0.84	-0.35	-0.6275	0.06	-0.4675	0.251874	0.907811	0.297125	0.999971	1	0.847402
Arhgap44	Q5SSM3	0.72	-0.06	-0.09	0.33	-0.16	0.42	-0.12	0.15	-0.16	0.64	0.08	-0.1	-0.41	-0.06	0.16	0.32	-0.1525	-0.11	-0.2225	0.558206	0.694017	0.416714	0.999971	1	0.877251
Arhgap5	E9PYT0	-0.8	-0.83	-0.27	-0.4	-0.49	-0.86	-0.36	-0.12	-0.48	-0.86	-0.39	0.12	-0.47	-0.82	-0.19	-0.03	0.1175	0.1725	0.1975	0.62862	0.52127	0.440801	0.999971	1	0.883347
Arhgap6	G3UZI7	0.34	-1.05	-0.83	-0.35	0.21	0.07	-1.25	-0.5	0.41	0.03	-1.49	-1.09	-0.82	0.88	-0.03	-1.19	0.105	-0.0625	0.1825	0.80631	0.90192	0.722313	0.999971	1	0.955258
Arhgdia	Q99PT1	0.05	-0.96	-0.03	-0.19	-0.75	-0.74	-0.02	-0.05	-0.89	-0.37	-0.14	-0.39	-1.4	-0.6	-0.17	0	-0.1075	-0.165	-0.26	0.732157	0.573802	0.496151	0.999971	1	0.90168
Arhgdib	Q61599	0.46	1.56	0.17	1.2	1.54	1.45	0.48	1.39	1.59	1.1	0.9	1.01	1.06	1.72	1.22	0.74	0.3675	0.3025	0.3375	0.357824	0.397833	0.37415	0.999971	1	0.87031
Arhgef1	E9PUF7	0.37	-0.25	-0.71	-0.73	-0.14	-0.37	-0.58	-0.98	-0.12	0.08	-0.65	-0.76	-0.06	-0.13	-0.69	-0.64	-0.1875	-0.0325	-0.05	0.558103	0.921072	0.872726	0.999971	1	0.984109
Arhgef10	Q8C033	-0.55	-1.21	-0.01	-0.35	-1.03	-0.54	-0.62	-0.09	-0.69	-0.5	-1.11	-0.66	-0.83	-0.5	-0.07	-0.57	-0.04	-0.21	0.0375	0.900427	0.481262	0.902194	0.999971	1	0.990759
Arhgef10l	A2AWP8-3	0.19	-0.35	-0.38	-0.25	-0.19	-0.01	-0.1	-0.22	-0.28	0.11	-0.22	-0.32	0	-0.16	-0.22	-0.28	0.0675	0.02	0.0325	0.735494	0.924315	0.872544	0.999971	1	0.984109
Arhgef11	Q68FM7	-0.76	-0.87	-1.2	-1.27	-0.92	-0.66	-0.66	-1.04	-1.03	-0.9	-0.82	-0.81	-0.59	-0.79	-0.99	-1.12	0.205	0.135	0.1525	0.338935	0.490827	0.488358	0.999971	1	0.898175
Arhgef12	Q8R4H2	0.59	0.46	-1.79	-1.31	-0.96	-0.25	-1.85	-1.53	-0.29	-0.14	-2.13	-1.36	1.6	-0.24	-2.51	-1.85	-0.635	-0.4675	-0.2375	0.333351	0.509187	0.809337	0.999971	1	0.973762
Arhgef12_1	F8VQN6	-0.21	-0.34	-0.01	-0.05	-0.5	-0.52	0.26	-0.32	-0.44	-0.47	-0.05	0.08	-0.45	-0.32	-0.32	-0.1	-0.1175	-0.0675	-0.145	0.617392	0.744567	0.435444	0.999971	1	0.882419
Arhgef17	Q80U35	-0.43	0.54	0.31	-0.57	0.23	0.51	0.74	-0.36	0.04	-0.43	0.52	0.23	0.11	0.17	-0.3	-0.61	0.3175	0.1275	-0.12	0.381235	0.70492	0.716197	0.999971	1	0.952576
Arhgef18	A0A5F8MPF6	0.02	0.05	-0.24	-0.22	0.06	0.03	-0.33	-0.17	0	0.18	-0.18	-0.03	-0.45	0.08	-0.22	0.21	-0.005	0.09	0.0025	0.978816	0.618106	0.990731	0.999971	1	0.99925
Arhgef19	A2A832	1.12	0.06	-0.39	0.7	-0.7	-1.12	0.69	0.96	-0.25	0.97	0.2	0.98	-0.65	-2.43	-2.73	1.16	-0.415	0.1025	-1.535	0.466067	0.811087	0.102497	0.999971	1	0.78268
Arhgef2	H3BJU7	-0.1	0.06	0.37	0.3	0.06	0.02	0.38	0.37	0.33	0.03	0.69	0.45	0.07	-0.06	0.23	0.54	0.05	0.2175	0.0375	0.804813	0.330808	0.862356	0.999971	1	0.982963
Arhgef25	A0A1W2P6R9	-1.57	-1.29	-0.26	-0.64	-0.59	-1.21	-0.41	-0.3	-1.09	-1.03	-0.58	-0.51	-0.95	-1.19	-0.45	-0.64	0.3125	0.1375	0.1325	0.388265	0.680769	0.696692	0.999971	1	0.947174
Arhgef26	D3YYY8	0	-0.27	0.12	-0.25	-0.53	-0.1	-0.08	0.03	-0.75	0.18	-0.69	-0.54	-0.6	0.14	-0.23	0.13	-0.07	-0.35	-0.04	0.737221	0.197546	0.865398	0.999971	1	0.983318
Arhgef28	A0A286YDI4	-0.04	-0.05	-0.26	0.17	0.37	0.45	-0.24	0.53	-0.05	-0.06	0.15	-0.2	0.52	0.3	0.35	0.03	0.3225	0.005	0.345	0.189557	0.97813	0.106756	0.999971	1	0.78268
Arhgef4	E9PYK8	0.18	0.69	0.43	0.52	0.93	0.68	0.2	0.73	0.02	0.32	0.52	0.7	0.37	1.08	0.57	0.46	0.18	-0.065	0.165	0.436855	0.768646	0.479871	0.999971	1	0.894438
Arhgef40	Q3UPH7-3	-0.43	-1.02	-0.42	-0.23	-0.59	-0.4	-0.5	-0.5	-0.84	-0.28	-0.59	-0.23	-1.24	-0.78	-0.2	-0.52	0.0275	0.04	-0.16	0.900358	0.872381	0.585594	0.999971	1	0.920413
Arhgef6	F6WMJ3	0.63	-1.11	-0.27	-0.66	-1.36	-0.49	-0.23	-0.56	-1.37	-0.23	-0.29	-0.37	-1.71	-0.85	-0.36	-0.86	-0.3075	-0.2125	-0.5925	0.471011	0.62644	0.19955	0.999971	1	0.813335
Arhgef7	Q9ES28	0.1	-0.43	-0.94	-0.91	-0.43	-0.36	-0.49	-1.21	-0.27	-0.12	-0.51	-0.89	-0.48	-0.61	-1.02	-0.82	-0.0775	0.0975	-0.1875	0.807278	0.748476	0.517376	0.999971	1	0.905815
Arhgef7_1	Q9ES28-5	1.32	2.27	2.94	3.27	1.57	2.63	2.66	3.02	1.33	1.75	2.34	2.83	3.05	2.73	2.53	2.52	0.02	-0.3875	0.2575	0.967658	0.450336	0.548636	0.999971	1	0.911727
Arhgef9	B1AXI4	-0.03	-1.17	-1.08	-0.94	-0.61	-0.72	-0.61	-0.65	-0.72	-0.28	-0.89	-0.94	-0.98	-0.71	-0.94	-0.92	0.1575	0.0975	-0.0825	0.576532	0.751921	0.772004	0.999971	1	0.963498
Arid1a	E9QAQ7	2.4	1.5	1.17	1.83	1.14	1.36	2.87	1.02	0.85	2.14	0.77	0.96	0.19	1.26	1.02	1.16	-0.1275	-0.545	-0.8175	0.786495	0.195455	0.0428607	0.999971	1	0.701725
Arid1b	E9Q6R4	2.03	2.15	1.43	2.01	1.86	1.91	1.18	1.73	1.62	1.99	1.31	1.5	1.2	2.12	1.58	1.95	-0.235	-0.3	-0.1925	0.37276	0.239606	0.494339	0.999971	1	0.901531
Arid2	E9Q7E2	1.21	-0.76	-0.54	-0.09	-0.89	-0.69	-0.1	-0.28	-0.63	0.42	-0.5	-0.79	-0.5	-0.29	-0.6	-0.45	-0.445	-0.33	-0.415	0.334527	0.501385	0.340338	0.999971	1	0.860574
Arid4a	F8VPQ2	2.25	1.84	0.4	0.96	1.11	2.47	0.05	0.12	1.45	2.96	1.28	-0.38	1.63	2.44	-0.01	0.28	-0.425	-0.035	-0.2775	0.511412	0.961605	0.66977	0.999971	1	0.938809
Arid4b	Z4YL44	4.86	2.87	1.69	0.96	1.92	4.48	3.43	-0.45	3.2	5.25	1.36	-0.86	-0.05	1.74	-0.31	-1.49	-0.25	-0.3575	-2.6225	0.836983	0.797452	0.0227592	0.999971	1	0.652043
Arih1	Q9Z1K5	0.24	1.79	1.28	0.86	1.63	1.51	1.85	0.43	1.95	0.87	1.3	0.93	1.54	0.95	0.86	0.07	0.3125	0.22	-0.1875	0.47472	0.581199	0.659485	0.999971	1	0.935181
Arih2	Q9Z1K6	0.46	0.72	0.08	0.65	0.43	0.8	0.22	0.63	0.5	0.45	0.55	0.29	0.18	0.74	0.46	0.48	0.0425	-0.03	-0.0125	0.852825	0.883301	0.955714	0.999971	1	0.998056
Arl1	F8WIB1	-0.03	0.57	0.84	0.87	0.7	0.47	0.19	1.02	0.35	-0.17	0.73	0.74	0.31	0.84	1.31	1.13	0.0325	-0.15	0.335	0.909513	0.625402	0.294287	0.999971	1	0.847402
Arl10	Q9QXJ4	-1.31	-0.87	-1.52	-1.95	-1.09	-1.26	-1.59	-1.59	-0.85	-1.2	-1.11	-0.65	-0.54	-0.45	-0.72	-1.89	0.03	0.46	0.5125	0.912903	0.120054	0.209482	0.999971	1	0.822138
Arl13b	Q640N2	-2.41	-1.12	-0.72	-1.16	-1.55	-2.31	-0.86	0.2	-2.47	-1.79	-2.11	-0.48	-1.68	-2.7	-1.36	-0.9	0.2225	-0.36	-0.3075	0.707376	0.499977	0.536807	0.999971	1	0.910077
Arl15	Q8BGR6	-1.33	-0.74	-0.85	-1.25	-0.71	-1.05	-1.09	-0.84	-0.52	-1.47	-0.6	-0.43	0.12	-1.16	-0.55	-0.47	0.12	0.2875	0.5275	0.583256	0.338175	0.112731	0.999971	1	0.78268
Arl2	Q9D0J4	-0.54	-0.08	-0.4	-0.39	-0.12	0.21	-0.46	0.06	-0.01	-0.36	-0.12	-0.02	0.28	0.34	0.05	-0.06	0.275	0.225	0.505	0.229416	0.253808	0.0288595	0.999971	1	0.678474
Arl2bp	Q9D385	-0.42	0.93	1.48	1.31	0.75	1.07	0.78	1.81	1.09	-0.38	0.94	1.59	0.74	0.55	1.64	1.6	0.2775	-0.015	0.3075	0.553823	0.978436	0.527802	0.999971	1	0.909722
Arl3	Q9WUL7	0.32	-0.1	0.12	-0.13	0.31	0.25	0.61	0.48	-0.48	0.34	0.09	0.31	-0.75	0.19	0.04	-0.09	0.36	0.0125	-0.205	0.0927147	0.959285	0.43493	0.999971	1	0.882419
Arl4c	P61208	-1.56	-2.23	0.47	-0.76	-3.05	-3.56	1.2	0.06	-3.57	-2.79	3.88	-1.02	-2.99	-2.09	-0.18	-1.03	-0.3175	0.145	-0.5525	0.784022	0.926852	0.474917	0.999971	1	0.894044
Arl5a	Q80ZU0	-0.28	0.87	0.73	0.78	0.77	1.05	0	0.77	0.51	0.5	0.61	0.37	0.81	1.27	0.94	0.78	0.1225	-0.0275	0.425	0.724444	0.923432	0.182368	0.999971	1	0.808532
Arl6	O88848	-0.53	-0.07	-0.83	-0.79	0.29	0.17	0.79	-0.44	0.23	-0.05	-0.2	0.25	0.56	0.3	-0.27	-0.63	0.7575	0.6125	0.545	0.0357149	0.0282727	0.119222	0.999971	1	0.78268
Arl6ip1	Q9JKW0	0.44	-0.64	-0.11	0.37	0.07	0.22	0.47	0.65	0.71	0.76	0.83	0.14	0.13	-0.18	0.29	-0.04	0.3375	0.595	0.035	0.266856	0.0765491	0.902135	0.999971	1	0.990759
Arl6ip4	Q9JM93	1.84	-0.2	0.39	0.93	-0.47	0.3	0.86	0.06	-0.24	1.5	0.1	-0.03	-0.55	0.23	0.04	0.64	-0.5525	-0.4075	-0.65	0.266648	0.460147	0.187995	0.999971	1	0.809025
Arl6ip5	Q8R5J9	-1.3	-0.62	-1.8	-3.09	-0.15	-1.35	-1.23	-2.94	-0.19	-1.41	-1.13	-0.84	0.01	-1.62	-2.51	-3.32	0.285	0.81	-0.1575	0.685792	0.159735	0.843141	0.999971	1	0.979814
Arl6ip6	Q8BH07	-3.66	-4.59	-3.7	-5.21	-3.32	-4.78	-3.39	-4.07	-3.47	-3.75	-3.05	-1.93	-3.57	-5.07	-4.58	-4.86	0.4	1.24	-0.23	0.407288	0.035934	0.625685	0.999971	1	0.930479
Arl8a	Q8VEH3	-1.52	-1.28	-1.76	-2.75	-1.1	-1.14	-1.29	-1.81	-0.96	-2.04	-0.95	-0.72	0.03	-1.25	-1.08	-2.07	0.4925	0.66	0.735	0.188386	0.140651	0.167505	0.999971	1	0.800215
Arl8b	Q9CQW2	-3.53	-2.02	-0.84	-1.04	-1.95	-1.74	-0.94	-0.12	-1.82	-2.53	-0.51	-0.26	-1.43	-1.33	-0.18	-0.58	0.67	0.5775	0.9775	0.333141	0.444503	0.143423	0.999971	1	0.788395
Armc1	Q9D7A8	0.63	-0.51	-0.07	-0.09	-0.88	-0.7	0.26	-0.62	-1.15	-0.35	-0.63	-0.73	-0.99	-0.53	-0.5	-0.61	-0.475	-0.705	-0.6475	0.189473	0.0394229	0.0424597	0.999971	1	0.701725
Armc10	Q9D0L7	-2.18	-0.85	0.16	-0.23	-0.73	-0.98	-0.15	-0.07	-0.72	-1.58	0.29	0.22	-0.19	-0.87	0.36	0.37	0.2925	0.3275	0.6925	0.574167	0.600259	0.224493	0.999971	1	0.828225
Armc6	Q8BNU0	-0.39	-0.36	0.75	0.03	-0.19	-0.3	0.87	0.12	-0.23	-0.45	1.17	0.68	-0.39	-0.26	0.32	0.31	0.1175	0.285	-0.0125	0.747542	0.52168	0.969361	0.999971	1	0.998787
Armc8	Q9DBR3-2	-2.46	0.09	0.26	-0.61	0.47	0.04	0.41	0.68	0.57	-2.08	0.52	0.36	1.73	-0.47	0.55	0.06	1.08	0.5225	1.1475	0.0908457	0.523543	0.130964	0.999971	1	0.784948
Armc8_1	G3X920	-0.9	0.25	1.58	0.47	0.04	0.05	0.75	0.79	0.19	-0.6	0.77	-0.07	0.2	0.3	0.6	0.66	0.0575	-0.2775	0.09	0.909933	0.609431	0.852826	0.999971	1	0.98187
Armc9	Q9D2I5-2	0.12	0.65	-0.64	0.28	0.72	1.03	-0.5	-0.15	0.47	0.58	-0.41	-0.03	1.24	0.6	-0.58	-0.39	0.1725	0.05	0.115	0.686715	0.88623	0.808266	0.999971	1	0.973379
Armcx2	Q6A058	1.39	0.02	0.07	-0.5	-0.21	0.18	-0.28	0.15	0.36	1.09	0.02	-0.25	-0.47	-0.49	0.43	0.31	-0.285	0.06	-0.3	0.483997	0.897495	0.505889	0.999971	1	0.905277
Armcx3	Q8BHS6	-0.08	0.42	0.09	-0.25	0.3	0.43	-0.05	0	0.44	0.13	0.15	0.05	0.82	0.28	0.09	0.71	0.125	0.1475	0.43	0.581892	0.492496	0.115675	0.999971	1	0.78268
Armcx4	E9PWM3	0.79	-0.44	-0.48	0.44	-0.36	-0.02	0.15	0.48	-0.52	0	0.57	0.33	-0.78	-0.86	-0.03	0.23	-0.015	0.0175	-0.4375	0.966325	0.96352	0.291858	0.999971	1	0.847402
Armh3	Q6PD19	-0.69	0.62	0.03	-0.09	0.25	0.05	-0.04	-0.02	0.52	-0.34	0.03	0.44	0.79	-0.1	0.09	0.35	0.0925	0.195	0.315	0.74929	0.561591	0.353448	0.999971	1	0.868675
Armt1	A6H630	0.1	1.46	0.77	0.48	1.7	0.91	1	1.05	1.73	-0.02	0.86	0.91	2.16	0.72	0.75	0.38	0.4625	0.1675	0.3	0.193137	0.700887	0.517953	0.999971	1	0.905815
Arnt2	Q61324-2	0.04	1.37	0.93	1.22	1.4	1.63	0.74	0.85	1.56	1.1	0.66	0.63	1.2	1.64	0.87	1.18	0.265	0.0975	0.3325	0.466745	0.787421	0.335945	0.999971	1	0.858827
Arntl	A0A1B0GS77	2.53	2.37	1.82	2.73	1.71	1.41	1.6	2.24	1.31	1.74	1.7	0.66	-0.41	2.09	0.73	2.38	-0.6225	-1.01	-1.165	0.0496727	0.0111903	0.0855624	0.999971	1	0.759991
Arpc1a	Q9R0Q6	-1.94	-0.86	-1.17	-1.26	-0.78	-0.18	-0.97	-1.14	-0.82	-1.55	-1.23	-1.74	-1.63	-0.57	-1.49	-1.84	0.54	-0.0275	-0.075	0.111996	0.928989	0.832549	0.999971	1	0.979036
Arpc1b	Q91Z25	0.73	0.4	0.53	0.28	0.86	0.41	0.65	0.35	0.44	0.44	0.86	0.32	0.22	0.66	0.91	0.69	0.0825	0.03	0.135	0.689295	0.882817	0.542385	0.999971	1	0.911119
Arpc2	Q9CVB6	-1.17	0.03	-0.99	-1.63	-0.3	-0.18	-0.86	-1.19	-0.32	-1.27	-0.69	-1.18	-0.28	-0.62	-1.16	-1.24	0.3075	0.075	0.115	0.45411	0.850531	0.774286	0.999971	1	0.963884
Arpc3	Q9JM76	-1.06	-0.55	0.4	-0.28	-0.5	-0.09	0.61	0.17	-0.48	-0.58	0.38	0.65	-1.3	-0.38	0.04	-0.5	0.42	0.365	-0.1625	0.275736	0.387445	0.683353	0.999971	1	0.943649
Arpc4	P59999	-1.86	-0.49	-1.03	-1.14	-0.52	-0.91	-0.87	-1.59	-0.73	-2.27	-0.75	-0.8	-0.13	-0.56	-1.72	-1.08	0.1575	-0.0075	0.2575	0.656916	0.986539	0.545553	0.999971	1	0.911398
Arpc5	Q9CPW4	0.08	0.16	-0.09	0.22	0.24	0.55	0.19	0.3	0.14	0.18	0.08	-0.11	0.26	0.1	-0.08	0.33	0.2275	-0.02	0.06	0.230861	0.908049	0.747949	0.999971	1	0.961064
Arpc5l	Q9D898	0.15	0.2	1.06	1.24	-0.01	0.06	0.67	0.69	-0.06	0.06	0.88	1.01	-0.17	-0.14	0.78	0.82	-0.31	-0.19	-0.34	0.371441	0.621529	0.385265	0.999971	1	0.871816
Arpin	Q9D0A3	0.17	0.59	0.04	0.35	0.61	0.46	-0.19	0.18	0.42	0.23	0.06	0.23	0.54	0.92	0.18	0.35	-0.0225	-0.0525	0.21	0.926323	0.789498	0.382641	0.999971	1	0.871816
Arpp19	P56212	0.92	0.51	1.32	1.92	0.51	0.5	0.9	1.54	0.43	1.25	1.09	1.41	-0.04	0.48	1.23	1.67	-0.305	-0.1225	-0.3325	0.424629	0.735084	0.472732	0.999971	1	0.893755
Arpp21	Q9DCB4	0.35	-0.89	0.14	0.4	-0.66	-0.75	0.73	-0.03	-0.25	0.13	-0.41	-0.6	-0.3	-0.59	0.22	-0.69	-0.1775	-0.2825	-0.34	0.681807	0.411376	0.354299	0.999971	1	0.868793
Arpp21_1	Q9DCB4-2	2.69	-0.7	1.32	3	0.42	0.46	1.79	2.19	0.77	2.2	1.16	0.15	-1.46	-0.67	1.06	0.57	-0.3625	-0.5075	-1.7025	0.674004	0.556407	0.089841	0.999971	1	0.771991
Arrb1	Q8BWG8	-0.16	0.36	-0.28	-0.2	0.48	-0.07	-0.4	-0.37	0.26	-0.13	-0.25	-0.69	-0.39	-0.02	-0.53	-0.6	-0.02	-0.1325	-0.315	0.940892	0.618029	0.198335	0.999971	1	0.813335
Arrb2	Q91YI4	2.93	2.58	2.32	1.73	1.81	2.24	1.67	2.45	1.95	1.89	2.52	2.03	2.46	2.59	2.28	2.33	-0.3475	-0.2925	0.025	0.287374	0.341539	0.928569	0.999971	1	0.994278
Arrdc1	A2AIS9	1.21	0.28	-0.42	-0.68	0.13	0.23	-0.32	0.09	0.1	0.76	-1.53	-0.64	0.03	0.26	-0.82	-0.63	-0.065	-0.425	-0.3875	0.876167	0.482389	0.413426	0.999971	1	0.876261
Arsa	P50428	0.86	0.6	0.64	0.74	1.32	0.37	0.68	0.92	1.12	0.58	0.49	0.41	0.86	-0.12	0.43	0.44	0.1125	-0.06	-0.3075	0.642502	0.779959	0.224973	0.999971	1	0.828225
Arsb	A0A0R4J138	0.29	0.33	-0.11	-0.82	0.26	0.03	-0.16	-0.23	0.08	0.31	0.21	-0.06	0.15	0.44	-0.86	-0.58	0.0525	0.2125	-0.135	0.859962	0.469942	0.72969	0.999971	1	0.956041
Arsg	Q3TYD4	0.53	-1.17	-2.14	-1.5	-1.43	-1.07	-1.96	-0.83	-0.76	0.04	-1.17	-1.58	-0.02	-0.75	-2.18	-1.6	-0.2525	0.2025	-0.0675	0.65864	0.741084	0.920043	0.999971	1	0.992702
Arsj	Q8BM89	-0.01	-2.14	-1.52	-2.12	-2.74	-0.97	-0.3	-1.21	-3	0.16	-1.07	-2.05	-4.65	-1.68	-2.34	-0.7	0.1425	-0.0425	-0.895	0.82703	0.955528	0.322249	0.999971	1	0.85548
Arvcf	P98203	-0.59	-1.38	-1.06	-1.09	-1.41	-0.96	-0.84	-1.09	-1.24	-0.79	-0.96	-1.19	-0.99	-1.17	-1.01	-0.95	-0.045	-0.015	7.85046e-17	0.850136	0.947832	1	0.999971	1	1
Arxes2	C0HK80	-1.69	0.82	0.19	-1.34	1.73	-0.8	1.18	-1.12	2.54	-1.28	1.37	1.93	3.26	-1.48	-0.5	-0.9	0.7525	1.645	0.6	0.378322	0.105276	0.587843	0.999971	1	0.920758
As3mt	Q91WU5	0.49	0.43	-0.59	0.11	0.68	0.27	-0.08	-0.68	0.82	0.64	-0.31	0.29	0.89	0.46	-0.12	-0.44	-0.0625	0.25	0.0875	0.865414	0.477031	0.815607	0.999971	1	0.974918
Asah1	Q9WV54	-0.55	0.13	0.07	0.42	0.16	-0.23	-0.29	-0.46	-0.01	-0.53	-0.17	-0.3	-0.05	0.24	-0.06	-0.06	-0.2225	-0.27	1.96262e-17	0.409387	0.306103	1	0.999971	1	1
Asah2	B7ZN55	-0.03	-0.89	-0.52	-0.65	-0.43	-0.61	-0.69	0.15	-0.93	-0.66	-0.62	0.09	-0.3	-0.36	-0.45	-0.37	0.1275	-0.0075	0.1525	0.648723	0.979565	0.504478	0.999971	1	0.905277
Asap1	H3BJY2	-3.59	-0.46	1.11	-0.08	-1.24	-1.41	0.15	-0.7	-1.47	-3.05	0.54	0.12	-2.17	-2.17	-0.22	0.34	-0.045	-0.21	-0.3	0.962132	0.856369	0.779107	0.999971	1	0.96583
Asap1_1	E9QMJ1	0.02	-0.03	-0.27	-0.27	-0.28	0.03	-0.1	-0.68	-0.29	-0.08	-0.24	-0.44	-0.31	-0.22	-0.64	-0.14	-0.12	-0.125	-0.19	0.585107	0.49233	0.347232	0.999971	1	0.864164
Asap2	D3YX85	1.88	-2.44	0.92	0.54	-3.06	-1.32	5.27	-0.06	-2.68	0.2	0.75	-1.46	-4.67	-4.72	-1.14	-2.63	-0.0175	-1.0225	-3.515	0.992191	0.362038	0.0122491	0.999971	1	0.613095
Asap2_1	E9PX52	-0.08	-0.38	-0.71	-0.5	-0.14	-0.13	-0.65	-0.87	-0.4	-0.13	-0.64	-0.74	-0.15	-0.25	0.37	-0.45	-0.03	-0.06	0.2975	0.905894	0.791156	0.250586	0.999971	1	0.839012
Asb13	Q8VBX0	-0.08	0.39	1.07	0.72	-0.12	0.27	0.62	0.95	0.29	-0.38	1.43	0.61	0.12	-0.19	0.37	0.87	-0.095	-0.0375	-0.2325	0.776416	0.929798	0.489388	0.999971	1	0.898346
Asb3	A0A0N4SV07	1.29	-0.79	-0.2	-0.75	-0.18	-0.34	-0.11	-0.31	-0.48	-1.12	0.06	0.87	0.91	-1.76	0.34	-0.87	-0.1225	-0.055	-0.2325	0.789527	0.925869	0.740248	0.999971	1	0.960899
Asb6	Q91ZU1	1.03	0.69	2.07	1.81	0.48	0.28	1.9	3.09	0.44	1.02	2.3	1.4	-0.48	0.45	2.08	2.79	0.0375	-0.11	-0.19	0.954979	0.817012	0.79624	0.999971	1	0.970435
Ascc1	Q9D8Z1	-0.39	0.51	0.28	-0.13	0.38	-0.37	-0.45	0.13	0.45	-0.21	0.22	0.3	0.32	0.35	0.01	-0.09	-0.145	0.1225	0.08	0.624294	0.646944	0.755321	0.999971	1	0.961116
Ascc2	Q91WR3-2	0.45	1.13	0.83	1.12	0.88	1.42	1.04	0.98	0.71	0.97	1.43	0.99	0.41	1.53	1.32	1.5	0.1975	0.1425	0.3075	0.409377	0.566564	0.340679	0.999971	1	0.860574
Ascc3	E9PZJ8	-0.15	0.78	0.39	0.28	0.8	0.54	0.25	0.52	0.79	0.43	0.67	0.68	1.06	0.95	0.5	0.61	0.2025	0.3175	0.455	0.426476	0.203806	0.105613	0.999971	1	0.78268
Asf1a	Q9CQE6	1.1	0.84	0.77	1.04	0.89	0.93	0.53	1.14	1.07	0.8	0.29	0.17	1.37	0.9	0.88	1.38	-0.065	-0.355	0.195	0.750691	0.182482	0.368391	0.999971	1	0.869526
Ash2l	Q91X20	2.01	1.73	2.35	2.73	1.65	1.05	1.81	2.5	1.25	1.77	2.16	2.31	0.9	1.65	2.16	2.6	-0.4525	-0.3325	-0.3775	0.229147	0.316771	0.364166	0.999971	1	0.869526
Asic1	Q6NXK8	-0.22	-0.65	-0.58	-0.23	-0.77	-0.44	-0.35	-0.11	-0.25	-0.26	-0.44	-0.46	0.26	-0.32	-0.14	0.16	0.0025	0.0675	0.41	0.990963	0.722142	0.0899029	0.999971	1	0.771991
Asic2	Q925H0-2	-2.08	-0.16	-0.35	-1.09	0.26	-0.18	-0.13	-0.71	0.04	-1.95	0.14	0.33	1.37	-1.29	-0.72	-0.97	0.73	0.56	0.5175	0.131411	0.385515	0.450718	0.999971	1	0.886265
Asic2_1	Q925H0	0.13	0.48	-0.34	0.5	1	-0.3	-0.5	0.23	-0.08	-0.39	1.05	0.27	0.54	0.08	-0.4	0.04	-0.085	0.02	-0.1275	0.821118	0.955549	0.659936	0.999971	1	0.93526
Asic4	D3YYS9	0.73	-0.46	-1.13	1.02	-0.55	-0.74	0.13	0.86	-1.04	0.05	-0.41	0.11	-0.23	-0.48	0.15	0.26	-0.115	-0.3625	-0.115	0.839997	0.498933	0.816555	0.999971	1	0.974929
Asl	Q91YI0	-0.44	0.26	0.09	0.07	0.28	0.07	-0.11	0.18	0.07	-0.49	-0.15	0.17	-0.08	0.03	-0.03	0.08	0.11	-0.095	0.005	0.616201	0.693787	0.980822	0.999971	1	0.99925
Asns	Q61024	0.65	0.95	0.56	0.91	1.01	0.38	1.06	0.92	0.75	0.54	0.79	1.21	0.52	0.78	0.7	0.68	0.075	0.055	-0.0975	0.739371	0.797432	0.600777	0.999971	1	0.92426
Aspa	Q8R3P0	-1.28	1.09	1.76	0.31	1.37	-0.35	0.63	-0.37	2.33	-1.57	0.57	0.94	3.67	-0.2	1.47	0.23	-0.15	0.0975	0.8225	0.83105	0.916937	0.407448	0.999971	1	0.874911
Asph	A2AL85	-0.09	-0.18	-0.25	-0.46	0.52	0.34	-0.14	0.08	0.17	0.3	0.04	0.57	0.82	0.23	0.02	0.35	0.445	0.515	0.6	0.0623366	0.0255983	0.0253457	0.999971	1	0.678474
Asph_1	Q8BSY0-3	-1.43	-0.01	-1	-0.53	0.2	0.08	-1.3	-0.24	-0.09	-0.66	-0.44	0.17	0.34	0.34	-0.29	-0.52	0.4275	0.4875	0.71	0.336694	0.18857	0.0801315	0.999971	1	0.755254
Asphd1	Q2TA57	0.57	0	0.37	0.32	-0.49	-0.21	1.24	-0.44	-0.62	-0.26	-0.18	-0.44	-1.09	-0.38	-0.75	-0.76	-0.29	-0.69	-1.06	0.481859	0.00791636	0.00122168	0.999971	1	0.412385
Asphd2	Q80VP9	-1.32	-0.9	-1.88	-1.59	-1.01	-0.92	-1.39	-1.32	-0.74	-1.58	-1.59	-1.25	-0.66	-0.92	-1.32	-1.67	0.2625	0.1325	0.28	0.328794	0.657281	0.378554	0.999971	1	0.871816
Aspscr1	Q8VBT9	-0.51	0.38	0.28	-0.07	0.31	-0.29	0.67	-0.02	0.03	-0.52	0.75	0.73	0.99	-0.37	-0.01	0.06	0.1475	0.2275	0.1475	0.623164	0.530217	0.673253	0.999971	1	0.94048
Asrgl1	Q8C0M9	0.25	0.76	0.49	0.3	0.57	0.72	0.34	0.84	0.49	0.28	0.17	0.04	0.73	0.88	0.34	0.21	0.1675	-0.205	0.09	0.431896	0.324682	0.700673	0.999971	1	0.948876
Ass1	P16460	0.57	0.42	1.02	1.3	0.42	0.14	0.62	1.64	0.3	0.39	0.75	1.21	0.13	0.61	1.67	1.17	-0.1225	-0.165	0.0675	0.742877	0.582825	0.858512	0.999971	1	0.982702
Astn1	Q61137-2	-1.11	-1.54	-1.14	-1.06	-1.3	-1.38	-1.14	-1.13	-1.39	-1.33	-0.85	-1.09	-1.32	-1.49	-1.42	-1.13	-0.025	0.0475	-0.1275	0.896312	0.822266	0.523069	0.999971	1	0.907797
Astn2	Q80Z10	0.39	-0.28	-0.16	-0.06	-0.19	0.03	-0.19	-0.07	-0.13	-0.08	-0.13	-0.77	0.28	-0.57	-0.67	-0.21	-0.0775	-0.25	-0.265	0.710126	0.326405	0.352135	0.999971	1	0.867656
Asxl2	D3Z112	1.05	2.37	-2.8	-2.65	1.98	2	2.42	-5.02	0.97	1.24	1.54	-3.8	2.81	2.01	-4.35	-4.72	0.8525	0.495	-0.555	0.665332	0.761333	0.794227	0.999971	1	0.970141
Atad1	Q9D5T0	0.21	0.31	0.02	0.15	0.19	0.97	0.59	0.5	0.43	0.7	0.2	0.09	0.92	0.82	0.24	0.29	0.39	0.1825	0.395	0.0999378	0.375393	0.109184	0.999971	1	0.78268
Atad2b	E9Q166	0.22	-1.01	-1.26	-0.39	-0.74	-0.81	-1.42	-1.14	-0.68	0.53	-0.87	-1.11	-1.67	-1.21	-2.06	-0.86	-0.4175	0.0775	-0.84	0.262983	0.86713	0.0636144	0.999971	1	0.725348
Atad3	Q925I1	-0.01	-0.79	-0.63	-0.34	-0.71	-0.96	-0.2	-0.65	-0.57	-0.39	-0.45	-0.67	-0.78	-0.83	-0.96	-0.97	-0.1875	-0.0775	-0.4425	0.473933	0.727796	0.0725043	0.999971	1	0.743312
Atat1	Q8K341-4	0.19	-1.44	-0.42	-0.34	-0.73	-1.05	-0.03	-0.39	-0.56	-0.04	0.21	-0.12	-0.46	-1.04	-0.23	-0.01	-0.0475	0.375	0.0675	0.902789	0.321591	0.862906	0.999971	1	0.982963
Atcay	Q8BHE3	-3.75	-6.05	-2.82	-3	-5.17	-5.55	-2.31	-3.06	-5.31	-4.81	-3.04	-3.18	-6.22	-5.26	-3	-2.94	-0.1175	-0.18	-0.45	0.903408	0.831809	0.651667	0.999971	1	0.933842
Ate1	A0A1L1SQ41	1.64	1.16	0.8	0.73	1.35	1.08	1.41	0.51	1.5	1.26	0.67	0.9	1.45	0.81	0.56	0.31	0.005	-3.33645e-16	-0.3	0.986722	1	0.365815	0.999971	1	0.869526
Atf2	P16951	1.82	2.19	2.58	2.04	1.51	1.82	2.54	2.02	1.84	1.71	2.39	2.88	1.08	1.96	1.76	1.58	-0.185	0.0475	-0.5625	0.518859	0.880436	0.0612786	0.999971	1	0.725348
Atf7ip	Q7TT18	1.48	1.86	1.19	0.76	1	1.36	1.47	1.28	1.16	1.73	1.57	0.76	0.86	1.5	0.3	1.39	-0.045	-0.0175	-0.31	0.868435	0.956365	0.392075	0.999971	1	0.871816
Atg101	Q9D8Z6	0.34	-0.13	-0.82	-0.92	-0.53	-0.39	-0.84	-0.61	-0.11	-0.02	-0.46	-0.63	0.2	0.1	-0.86	-0.67	-0.21	0.0775	0.075	0.511642	0.814533	0.846114	0.999971	1	0.979924
Atg12	Q9CQY1	0.94	2.37	1.62	1.56	1.93	2.84	1.42	1.46	2.59	2.6	1.95	1	1.85	1.92	1.24	1.5	0.29	0.4125	0.005	0.494429	0.371416	0.987986	0.999971	1	0.99925
Atg13	Q91YI1-2	-1.25	-0.38	0.4	-0.13	-0.42	-0.32	-0.11	0.87	-0.37	-1.76	0.92	0.44	-0.83	-0.57	0.13	0.91	0.345	0.1475	0.25	0.429779	0.812906	0.608801	0.999971	1	0.926608
Atg14	Q8CDJ3	2.36	1.63	1.46	1.12	1.11	1.87	1.93	1.94	1.62	2.11	1.5	1.07	1.1	1.52	1.56	0.8	0.07	-0.0675	-0.3975	0.831854	0.840621	0.23615	0.999971	1	0.832918
Atg16l1	Q8C0J2	0.95	0.19	0	0.07	0.11	-0.44	0.07	-0.58	-0.25	0.34	-0.02	0.05	-0.76	-0.29	-0.8	-0.26	-0.5125	-0.2725	-0.83	0.106658	0.325659	0.0150188	0.999971	1	0.613095
Atg2a	Q6P4T0	0	0.05	0.06	0.01	-0.19	-0.07	-0.16	-0.08	-0.39	0.13	0.02	-0.11	0.21	0.42	0	0.3	-0.155	-0.1175	0.2025	0.34403	0.524355	0.268526	0.999971	1	0.842746
Atg2b	Q80XK6	0.01	0	0.37	0.31	0	-0.19	0.31	0.29	-0.21	-0.09	0.48	0.52	-0.03	-0.13	0.39	0.46	-0.07	0.0025	5.88785e-17	0.736465	0.991757	1	0.999971	1	1
Atg3	Q9CPX6	-0.75	-0.4	0.06	-0.18	-0.14	-0.44	-0.06	0.11	-0.31	-0.94	0.19	0.57	-0.32	-0.15	0.15	0.17	0.185	0.195	0.28	0.448313	0.591985	0.265835	0.999971	1	0.842677
Atg4b	A0A0R4J065	-0.21	0.2	0.79	1.13	0.33	0.33	0.24	1.33	0.38	-0.01	0.42	0.43	0.46	0.3	0.97	1.14	0.08	-0.1725	0.24	0.833778	0.591904	0.503341	0.999971	1	0.904824
Atg4c	Q811C2	1.06	0.17	1.22	1.25	0.28	0.69	-1.22	-0.89	0.04	0.71	1.27	0.89	-0.07	-0.06	0.98	0.47	-1.21	-0.1975	-0.595	0.0326668	0.581415	0.118234	0.999971	1	0.78268
Atg5	Q99J83	0.12	0.97	-0.38	-1.03	0.7	0.5	-0.35	-1.65	0.75	0.23	-0.23	-0.2	0.57	0.33	-1.38	-1.41	-0.12	0.2175	-0.3925	0.846443	0.632925	0.532211	0.999971	1	0.910069
Atg7	A0A0A0MQN4	-0.33	0.17	-0.25	-0.11	-0.01	0.19	-0.23	-0.09	-0.03	-0.37	-0.2	-0.22	0.1	0.06	-0.13	0	0.095	-0.075	0.1375	0.635813	0.695629	0.475687	0.999971	1	0.894045
Atg9a	Q68FE2	0.03	-0.16	-0.08	-0.47	-0.05	-0.21	-0.13	-0.49	0.12	-0.31	-0.14	-0.1	0.59	-0.66	-0.3	-0.19	-0.05	0.0625	0.03	0.803887	0.750188	0.918986	0.999971	1	0.992633
Atic	Q9CWJ9	-0.13	0.38	-0.06	0.1	0.41	0.26	-0.2	0.19	0.13	0.02	-0.09	0.04	0.35	0.53	0.16	0.38	0.0925	-0.0475	0.2825	0.672467	0.799418	0.177698	0.999971	1	0.808532
Atl1	Q8BH66	-0.67	-0.64	-0.7	-1.1	-0.65	-0.24	-0.6	-0.96	-0.44	-0.61	-0.49	-0.81	0.15	-0.32	-0.64	-0.9	0.165	0.19	0.35	0.46891	0.341415	0.217703	0.999971	1	0.826893
Atl2	Q6PA06	0.2	0.26	0.67	0.84	0.38	0.42	0.36	1.13	0.33	0.11	0.74	0.91	0.68	0.6	1.02	1.03	0.08	0.03	0.34	0.762734	0.908725	0.165879	0.999971	1	0.800215
Atl3	Q91YH5	-0.89	-0.61	0.16	0.32	-0.24	-0.63	-0.3	0.31	-0.46	-0.96	0.18	0.73	-0.46	-0.41	0.47	0.28	0.04	0.1275	0.225	0.908094	0.774837	0.544741	0.999971	1	0.911398
Atox1	O08997	0.25	0.48	1.14	1.7	0.43	0.19	0.86	1.27	0.38	0.23	0.76	1.38	0.66	0.6	1.32	1.84	-0.205	-0.205	0.2125	0.601812	0.610721	0.614883	0.999971	1	0.927839
Atp11a	E9Q3G7	0.1	-0.64	-0.43	-0.27	-0.6	-0.67	-0.29	-0.71	-0.49	-0.33	-0.61	-0.43	0.02	-0.69	-0.28	-0.38	-0.2575	-0.155	-0.0225	0.269173	0.471916	0.926849	0.999971	1	0.994151
Atp11b	Q6DFW5	-0.88	1	1.24	0.42	0.73	0.91	0.88	1.14	0.98	-0.11	0.95	-0.54	1.39	0.47	1.21	0.68	0.47	-0.125	0.4925	0.31351	0.824053	0.325264	0.999971	1	0.856472
Atp11c	E9QKK8	-1.43	-1.02	-0.89	-1.24	-1.02	-1.16	-1.05	-1.22	-0.79	-1.49	-1.45	-0.91	-0.5	-0.69	-1.09	-1.14	0.0325	-0.015	0.29	0.866163	0.951083	0.234339	0.999971	1	0.832918
Atp13a1	Q9EPE9	-0.18	0.32	0.27	0.09	0.3	0.33	-0.03	0.17	0.39	0.22	0.06	0.03	0.76	0.55	0.21	0.43	0.0675	0.05	0.3625	0.734941	0.799331	0.114093	0.999971	1	0.78268
Atp13a2	E9PYX5	-0.65	-0.18	-2.28	-2	-0.58	-0.02	-1.99	-0.9	-0.25	-0.02	-0.94	-1.19	-0.4	0.08	-0.77	-1.55	0.405	0.6775	0.6175	0.50515	0.229082	0.291406	0.999971	1	0.847402
Atp13a3	Q5XF89	1.37	0.55	0.03	-0.32	0.01	1.56	-0.45	1.45	0.05	0.9	0.22	-0.55	-0.02	1.35	1.01	0.82	0.235	-0.2525	0.3825	0.683115	0.575244	0.397423	0.999971	1	0.871816
Atp13a4	A0A0R4J0M2	-1.07	-2.12	-2.06	-1.13	-1.54	-2.15	-1.79	-0.39	-1.88	-1.55	-1.36	-1.22	-2.22	-1.35	-1.02	-1.88	0.1275	0.0925	-0.0225	0.775921	0.773843	0.952667	0.999971	1	0.998056
Atp1a1	Q8VDN2	-0.47	-1.12	-1.33	-1.29	-1.19	-1.01	-1.26	-1.37	-1.39	-0.91	-1.37	-1.64	-1.2	-1.34	-1.68	-1.26	-0.155	-0.275	-0.3175	0.530058	0.32152	0.231481	0.999971	1	0.8307
Atp1a2	Q6PIE5	-1.03	-1.55	-1.01	-0.98	-1.59	-1.23	-1.25	-1.11	-1.46	-1.21	-1.33	-2.24	-1.44	-1.36	-1.05	-0.97	-0.1525	-0.4175	-0.0625	0.488051	0.165022	0.778649	0.999971	1	0.965656
Atp1a3	A0A0G2JGX4	-0.76	-1.36	-1.89	-1.66	-1.52	-1.35	-1.94	-1.76	-1.5	-1.01	-2.02	-2.04	-1.27	-1	-1.79	-1.58	-0.225	-0.225	0.0075	0.444466	0.516159	0.980481	0.999971	1	0.99925
Atp1b1	P14094	-1.71	-1.81	-2.05	-2.03	-1.89	-1.24	-1.78	-2.02	-1.86	-1.8	-1.58	-1.74	-1.8	-1.45	-1.71	-1.76	0.1675	0.155	0.22	0.471649	0.393456	0.25833	0.999971	1	0.839012
Atp1b2	P14231	-2.38	-2.64	-1.33	-1.42	-2.28	-2.65	-1.22	-1.43	-2.25	-2.66	-1.4	-1.25	-2.04	-2.39	-1.48	-1.51	0.0475	0.0525	0.0875	0.915312	0.906534	0.820172	0.999971	1	0.975761
Atp1b3	P97370	0.55	-0.85	0.08	0.15	-0.32	-0.82	-0.72	-0.35	-0.63	-0.08	-0.65	0.03	-0.41	-0.52	0.19	0.16	-0.535	-0.315	-0.1275	0.125229	0.36921	0.713166	0.999971	1	0.951793
Atp23	G3UW46	1.05	1.44	-0.37	-1.13	0.9	0.5	-0.25	0.08	-0.21	0.45	0.21	-0.08	1.35	0.01	0.15	-0.51	0.06	-0.155	0.0025	0.919593	0.786277	0.996944	0.999971	1	1
Atp2a2	O55143	-0.48	-0.19	-0.51	-0.33	-0.48	-0.09	-0.67	-0.25	-0.46	-0.35	-0.35	-1.02	-0.3	-0.08	-0.46	-0.31	0.005	-0.1675	0.09	0.980339	0.450587	0.626351	0.999971	1	0.930479
Atp2a3	B1ATS5	1.59	-0.15	0.1	0.55	2.69	0.33	0.09	0.42	0.52	2.61	0.68	1.26	-1.26	0.11	0.2	0.7	0.36	0.745	-0.585	0.583734	0.208878	0.283352	0.999971	1	0.844538
Atp2b1	G5E829	-1.24	-0.6	0.23	0.15	-1.19	-1.02	-0.1	-0.01	-1.21	-1.32	-0.19	-1.93	-0.76	-1.19	-0.28	-0.17	-0.215	-0.7975	-0.235	0.623932	0.116969	0.561501	0.999971	1	0.916133
Atp2b1_1	A0A1W2P772	0.12	-1	-1.7	-1.37	-1.57	-1.33	-1.43	-1.61	-1.28	-0.7	-1.6	-1.53	-1.77	-1.18	-1.43	-1.46	-0.4975	-0.29	-0.4725	0.21902	0.49945	0.253602	0.999971	1	0.839012
Atp2b2	F8WHB1	-0.93	-1.16	-1.23	-1.37	-1.58	-1.23	-1.28	-1.58	-1.61	-1.43	-1.21	-1.45	-1.36	-1.45	-1.64	-1.28	-0.245	-0.2525	-0.26	0.229134	0.201073	0.193526	0.999971	1	0.810547
Atp2b2_1	S4R1C4	-1.19	-0.09	-0.7	-0.75	-0.78	0.28	-1.05	-0.51	-0.84	-0.75	-0.48	-0.92	0.64	0.23	-0.61	-0.36	0.1675	-0.065	0.6575	0.641139	0.806506	0.0919467	0.999971	1	0.773779
Atp2b3	Q0VF55	-0.68	-1.16	-0.67	-0.79	-1.52	-1.09	-0.75	-0.8	-1.31	-0.92	-1.2	-1.49	-1.46	-1.39	-1.11	-0.98	-0.215	-0.405	-0.41	0.385944	0.0826032	0.0799758	0.999971	1	0.755254
Atp2b3_1	A2ALL9	-1.42	-0.75	-0.76	-1.09	-1.21	-0.25	-1.25	-0.89	-0.79	-0.69	-0.81	-0.83	-0.17	-0.39	-0.64	-0.4	0.105	0.225	0.605	0.719869	0.29886	0.0242281	0.999971	1	0.669136
Atp2b4	E9Q828	-2.05	-1.73	-1.45	-1.63	-1.48	-1.5	-0.64	-1.31	-1.61	-1.96	-1.26	-1.51	-0.95	-1.77	-1.37	-1.35	0.4825	0.13	0.355	0.0916829	0.572305	0.167573	0.999971	1	0.800215
Atp2c1	H3BL44	-0.31	0.23	0.23	0.28	0.3	0.67	0.06	0.41	0.51	0.11	0.27	0.66	0.61	0.62	0.71	0.43	0.2525	0.28	0.485	0.284751	0.232379	0.0403967	0.999971	1	0.700838
Atp5c1	A2AKU9	0.35	-0.4	-1.09	-1.05	-0.13	0.14	-0.18	-1.45	-0.02	-0.17	-1.17	-1.49	-0.42	-1.04	-1.41	-1.83	0.1425	-0.165	-0.6275	0.75687	0.724302	0.16773	0.999971	1	0.800215
Atp5c1_1	Q8C2Q8	0.08	-0.57	-1.79	-0.75	-1.42	-2.03	-1.34	-0.98	-1.37	-0.96	-0.75	-1.53	-1.83	-1.3	-2.24	-1.28	-0.685	-0.395	-0.905	0.130954	0.346986	0.0596372	0.999971	1	0.725348
Atp5f1a	Q03265	-1.06	-1.19	-1.72	-1.38	-1.31	-1.31	-1.44	-1.5	-1.64	-1.3	-1.55	-1.45	-1.14	-1.18	-1.31	-1.42	-0.0525	-0.1475	0.075	0.798352	0.485674	0.7209	0.999971	1	0.954713
Atp5f1b	P56480	-0.52	-0.87	-1.18	-0.43	-0.88	-0.79	-1.3	-0.68	-1.16	-0.67	-1.36	-1.19	-1.06	-0.55	-1.06	-0.33	-0.1625	-0.345	0	0.517184	0.194528	1	0.999971	1	1
Atp5f1d	Q9D3D9	-1.32	0	-0.26	-0.39	-0.35	0.19	-0.43	-0.3	-0.54	-1.36	-0.96	-0.76	-0.37	0.08	-0.34	-0.61	0.27	-0.4125	0.1825	0.410731	0.237856	0.575861	0.999971	1	0.918194
Atp5f1e	P56382	0.86	0.98	0.65	0.13	-0.17	1.05	2.25	0.34	-0.02	0.96	-0.05	0.29	0.99	0.45	0.63	0.4	0.2125	-0.36	-0.0375	0.681032	0.259017	0.883708	0.999971	1	0.986782
Atp5j2	F8WHP8	-0.96	-0.48	-0.7	-0.25	-0.29	-0.73	-1.06	-0.1	-0.85	-0.52	-0.61	-0.6	-0.54	-0.24	-0.26	-0.06	0.0525	-0.0475	0.3225	0.851228	0.823321	0.174393	0.999971	1	0.807788
Atp5mc1	Q9CR84	0.46	-0.12	1.74	0.94	-2.24	0.48	1.98	0.64	-0.6	-0.69	1.95	-0.77	-1.37	-0.21	-0.01	-1.13	-0.54	-0.7825	-1.435	0.53804	0.280981	0.0148607	0.999971	1	0.613095
Atp5me	Q06185	-2.22	-1.62	-2.15	-1.78	-2.16	-2.05	-1.58	-2.91	-2.74	-2.55	-2.57	-2.64	-1.71	-1.39	-1.65	-1.46	-0.2325	-0.6825	0.39	0.46714	0.00803582	0.0942778	0.999971	1	0.779538
Atp5mg	Q9CPQ8	-3.33	-3.5	-2.79	-2.59	-3.43	-3.48	-2.38	-3.12	-3.75	-3.57	-2.95	-3.14	-3.65	-3.12	-2.18	-2.27	-0.05	-0.3	0.2475	0.880214	0.322639	0.53722	0.999971	1	0.910077
Atp5mj	P56379	-3.87	-1.17	-0.94	-2.13	-1.12	-2.32	0.1	-2.04	-1.39	-4.48	-1.28	-0.74	-1.02	-2.41	-1.34	-3.2	0.6825	0.055	0.035	0.389014	0.954741	0.962827	0.999971	1	0.998721
Atp5mk	Q78IK2	-0.63	-0.69	-0.47	-0.11	-0.37	-0.46	-0.78	0	-0.75	-0.48	-0.4	-0.25	-0.43	-0.61	-0.16	0.25	0.0725	0.005	0.2375	0.762633	0.981192	0.363185	0.999971	1	0.869526
Atp5pb	Q9CQQ7	-0.57	0.07	0.36	0.17	-0.32	0.1	0.21	0.24	-0.45	-0.37	0.21	0.3	0.11	-0.12	0.59	0.92	0.05	-0.085	0.3675	0.848763	0.77	0.260691	0.999971	1	0.841256
Atp5pd	Q9DCX2	-2.82	-3.06	-2.19	-2.56	-2.87	-3.04	-1.81	-2.35	-3.06	-3.03	-2.15	-2.25	-3.49	-2.4	-2.36	-2.33	0.14	0.035	0.0125	0.67547	0.910561	0.970327	0.999971	1	0.998787
Atp5pf	P97450	-0.52	-1.31	-1.77	-0.86	-1.63	-1.69	-1.38	-1.18	-1.75	-1.36	-1.34	-1.86	-1.81	-0.82	-1.68	-0.88	-0.355	-0.4625	-0.1825	0.260781	0.158969	0.62102	0.999971	1	0.929388
Atp5po	Q9DB20	-0.46	-0.47	-0.7	-0.75	-0.62	-0.59	-0.58	-0.69	-0.78	-0.53	-0.86	-0.9	-0.29	-0.27	-0.78	-0.78	-0.025	-0.1725	0.065	0.884126	0.356057	0.760528	0.999971	1	0.961116
Atp6ap1	Q9R1Q9	-1.36	-1.07	-1.2	-1.44	-1.03	-1.26	-1.02	-1.51	-1.01	-1.25	-0.78	-1.03	-1.4	-1.14	-1.14	-1.1	0.0625	0.25	0.0725	0.755502	0.208964	0.694155	0.999971	1	0.947174
Atp6ap2	Q9CYN9	-1.11	-0.94	-1	-1.43	-0.35	-1.2	-1.17	-1.51	-0.5	-1.68	-0.58	-0.22	-0.34	-1.29	-1	-1.28	0.0625	0.375	0.1425	0.826328	0.282773	0.598977	0.999971	1	0.924014
Atp6v0a1	K3W4T3	-1.14	-1.3	-1.59	-1.62	-1.47	-1.29	-1.33	-1.64	-1.5	-1.39	-1.33	-1.72	-1.49	-1.25	-1.65	-1.46	-0.02	-0.0725	-0.05	0.920023	0.716234	0.803696	0.999971	1	0.971467
Atp6v0a1_1	Q9Z1G4	0.37	0.85	1.08	0.54	0.88	-0.15	-0.37	0.67	-0.72	-0.37	-0.07	1.03	-0.03	-0.64	-0.09	0.51	-0.4525	-0.7425	-0.7725	0.206104	0.0872994	0.0260785	0.999971	1	0.678474
Atp6v0a2	P15920	1.37	0.4	0.48	0.71	0.41	0.21	0.68	0.35	0.36	1.01	0.08	0.08	0.02	0.24	0.65	0.68	-0.3275	-0.3575	-0.3425	0.233978	0.273294	0.251459	0.999971	1	0.839012
Atp6v0c	E9Q9C5	-1.96	-0.06	-0.44	-1.01	-0.27	-0.4	-0.7	-0.27	-0.62	-1.7	0.01	-0.81	-0.82	-0.1	-0.49	-0.5	0.4575	0.0875	0.39	0.277119	0.862683	0.362421	0.999971	1	0.869526
Atp6v0d1	P51863	-1.13	-0.77	-0.14	-0.08	-0.97	-0.61	-0.42	0.17	-1.01	-0.99	-0.14	-1.03	-0.65	-0.55	0.39	0.03	0.0725	-0.2625	0.335	0.832888	0.438572	0.349535	0.999971	1	0.865435
Atp6v1a	P50516	-1.16	-1.12	-0.3	-0.59	-0.97	-1.23	-0.18	-0.12	-1.1	-1.67	-0.07	0.03	-0.68	-1.2	-0.17	-0.18	0.1675	0.09	0.235	0.629001	0.836833	0.475175	0.999971	1	0.894044
Atp6v1b2	P62814	-0.88	-1.33	-0.94	-0.93	-1.36	-1.45	-0.81	-1.11	-1.59	-1.43	-0.89	-1.02	-1.43	-1.19	-0.98	-0.75	-0.1625	-0.2125	-0.0675	0.468717	0.368693	0.761898	0.999971	1	0.961309
Atp6v1c1	Q9Z1G3	-1.11	-0.82	-0.42	-0.89	-1.01	-0.86	-0.12	-0.69	-0.8	-1.08	-0.22	-0.43	-0.96	-1	-0.55	-0.81	0.14	0.1775	-0.02	0.598613	0.501885	0.927794	0.999971	1	0.994229
Atp6v1d	P57746	-1.16	-1.04	-0.9	-0.86	-1.13	-1.02	-0.93	-0.83	-1.04	-1.36	-0.68	-0.6	-0.94	-1.18	-0.71	-0.64	0.0125	0.07	0.1225	0.943639	0.756757	0.544308	0.999971	1	0.911398
Atp6v1e1	P50518	-0.74	0.18	-1.19	-1.18	0.93	-0.24	-0.66	-1.26	1.29	-0.97	-0.5	-0.32	2.51	-0.65	-1.19	-0.84	0.425	0.6075	0.69	0.423019	0.2811	0.412048	0.999971	1	0.875856
Atp6v1f	Q9D1K2	-0.35	-0.07	-0.86	-1.14	0.08	-0.04	-0.62	-0.96	0.21	-1.36	-0.11	-0.24	1.47	-0.08	-0.88	-1	0.22	0.23	0.4825	0.523419	0.570178	0.405163	0.999971	1	0.874565
Atp6v1g1	Q9CR51	-0.09	-0.16	0.19	0.36	-0.32	-0.19	-0.01	0.38	-0.09	0.73	0.49	0.51	0.01	-0.1	0.46	1	-0.11	0.335	0.2675	0.637138	0.19076	0.369435	0.999971	1	0.869526
Atp6v1g2	Q9WTT4	0.1	-0.82	-0.83	-0.87	-1.17	-0.45	-0.49	-1.03	-0.9	-0.26	-0.9	-1.52	-1.47	-0.71	-0.89	-1.49	-0.18	-0.29	-0.535	0.559533	0.409209	0.115321	0.999971	1	0.78268
Atp6v1h	A0A0A6YW86	1.78	3.27	3.13	2.64	2.16	4.52	2.12	2.6	2.32	4.16	2.16	-0.14	3.89	3.61	2.48	3.47	0.145	-0.58	0.6575	0.809668	0.501658	0.153269	0.999971	1	0.795578
Atp6v1h_1	Q8BVE3	-1.09	-1.23	-1.16	-1.01	-1.15	-0.71	-1.02	-1.17	-1.19	-1.05	-1.04	-1.01	-1.17	-0.63	-0.94	-0.79	0.11	0.05	0.24	0.56004	0.758152	0.231023	0.999971	1	0.830179
Atp7a	A2AG68	-1.03	-0.11	-0.27	-0.34	0.35	-0.11	-0.7	0.04	0.08	-1.26	-0.59	-0.1	-0.36	-0.01	-0.21	-0.35	0.3325	-0.03	0.205	0.293947	0.932599	0.418894	0.999971	1	0.87788
Atp8a1	P70704	-1.07	-0.97	-0.76	-0.89	-0.83	-0.87	-0.64	-0.75	-0.9	-1.03	-0.63	-0.95	-0.65	-0.98	-0.79	-0.83	0.15	0.045	0.11	0.395575	0.803044	0.540852	0.999971	1	0.910478
Atp8a2	P98200	-1.16	-0.6	-0.07	-0.39	-0.51	-0.34	-0.22	-0.19	-0.17	-0.66	-0.07	-0.41	0.08	-0.5	-0.35	-0.47	0.24	0.2275	0.245	0.372695	0.42388	0.394369	0.999971	1	0.871816
Atp9a	A2AQC3	-0.52	-0.54	-0.39	-0.16	-0.45	0.02	0.16	0.05	-0.19	-0.25	0.24	-0.08	0.15	0.18	0.12	0.06	0.3475	0.3325	0.53	0.12621	0.117704	0.0141577	0.999971	1	0.613095
Atp9b	A0A286YCV0	-0.15	-0.31	0.28	0.06	-0.63	-0.4	-0.03	0.19	-0.56	-0.35	-0.25	-0.8	-0.27	-0.2	0.05	0.03	-0.1875	-0.46	-0.0675	0.462776	0.0606244	0.743904	0.999971	1	0.961064
Atpaf1	H3BLL2	0	-0.23	-0.39	-0.25	-0.37	-0.8	-0.64	-0.42	-1.03	-0.8	-0.29	-0.31	-1.11	-0.69	-0.48	-0.74	-0.34	-0.39	-0.5375	0.105345	0.122658	0.0274444	0.999971	1	0.678474
Atpaf2	Q91YY4	-1.03	-0.58	-0.69	-0.55	-0.31	-0.36	-0.98	-0.07	-0.67	-0.78	-0.85	-0.58	-0.2	-0.07	-0.46	-0.62	0.2825	-0.0075	0.375	0.277272	0.968212	0.107798	0.999971	1	0.78268
Atpif1	E9PV44	-0.02	-2.15	-1.13	-1.54	-1.99	-2	0.03	-1.64	-2.28	-0.68	-0.85	-1.86	-3.81	-2.53	-1.93	-2.77	-0.19	-0.2075	-1.55	0.752738	0.706006	0.018901	0.999971	1	0.635388
Atpsckmt	E0CXY7	0.13	-0.53	0.05	-0.51	-0.3	-0.52	-0.04	0.16	0.13	0.65	0.08	0.14	0.32	-0.16	-0.36	0.27	0.04	0.465	0.2325	0.875893	0.0885837	0.390554	0.999971	1	0.871816
Atraid	G3UXG8	0.99	2.05	2.72	1.67	1.94	2.02	4.56	1.47	1.81	2.29	1.74	-1.27	0.28	1.47	0.4	-1.7	0.64	-0.715	-1.745	0.378765	0.385857	0.0292379	0.999971	1	0.678474
Atrn	Q9WU60	-0.1	-0.17	0.15	-0.02	-0.38	0.48	0	0.49	-0.27	-0.03	0.12	0.08	0.22	0.17	0.32	-0.14	0.1825	0.01	0.1775	0.470694	0.956034	0.36211	0.999971	1	0.869526
Atrnl1	Q6A051	1.06	0.16	0.5	0.57	0.09	0.82	0.46	0.44	0.34	0.86	0.54	0.15	-0.29	0.32	0.34	0.24	-0.12	-0.1	-0.42	0.647572	0.702582	0.135098	0.999971	1	0.784948
Atrx	Q61687	-0.1	-0.59	-0.56	-0.69	-0.64	-0.72	-0.56	-0.67	-0.66	-0.46	-0.27	-0.5	-0.52	-0.73	-0.59	-0.73	-0.1625	0.0125	-0.1575	0.417973	0.951167	0.440502	0.999971	1	0.883277
Atxn1	J3QPR1	3.05	2.09	2.48	2.89	1.95	1.83	1.96	2.85	1.85	2.59	2.13	2.39	1.3	2.28	2.46	2.76	-0.48	-0.3875	-0.4275	0.160805	0.193429	0.26859	0.999971	1	0.842746
Atxn10	P28658	-0.15	0.61	0.44	0.53	0.76	0.61	0.23	0.72	0.68	0.16	0.34	0.59	0.77	0.98	0.9	0.99	0.2225	0.085	0.5525	0.370415	0.723756	0.0330308	0.999971	1	0.685881
Atxn1l	P0C7T6	2.37	1.64	0.72	0.44	1.38	1.87	1.83	0.41	1.27	2.99	0.77	1.3	1.52	2.41	0.23	0.02	0.08	0.29	-0.2475	0.876406	0.631969	0.704547	0.999971	1	0.950182
Atxn2	E9QM77	1.13	1.79	1.23	1.47	1.58	2.07	1.46	1.52	1.55	1.57	1.05	1.29	1.41	1.79	1.45	1.41	0.2525	-0.04	0.11	0.302541	0.860572	0.617942	0.999971	1	0.928581
Atxn2_1	F6U2C2	0.15	1.38	2.04	2.24	-0.06	0.72	1.34	2.31	0.34	-0.26	1.83	1.57	0.83	1.26	1.37	2.25	-0.375	-0.5825	-0.025	0.552982	0.365569	0.961344	0.999971	1	0.998721
Atxn2l	Q7TQH0-2	1.59	1.62	1.73	1.69	1.5	1.34	1.5	1.36	1.64	1.69	1.48	1.81	1.05	1.21	1.29	1.55	-0.2325	-0.0025	-0.3825	0.17971	0.988008	0.063589	0.999971	1	0.725348
Atxn3	Q9CVD2	2.7	0.35	0.05	0.33	0.39	0.35	0.22	0.29	0.23	0.78	0.06	0	-0.38	-0.48	0.12	-0.68	-0.545	-0.59	-1.2125	0.34968	0.332463	0.0647578	0.999971	1	0.726851
Atxn7l3b	Q3UD01	1.74	1.28	0.66	0.33	1.39	1.04	0.12	-0.01	1.09	1.6	0.69	1.18	1.05	1.17	0.7	0.88	-0.3675	0.1375	-0.0525	0.412092	0.702192	0.873966	0.999971	1	0.984109
Auh	A0A0R4J023	0.13	0.03	-0.52	-0.53	-0.48	-0.16	-0.79	-0.92	-0.34	-0.36	-0.67	-0.73	-0.07	-0.06	-0.92	-0.47	-0.365	-0.3025	-0.1575	0.192683	0.220873	0.582437	0.999971	1	0.920364
Aup1	P70295	-0.75	-1.38	-0.42	-0.19	-1.05	-1.24	-0.85	-0.36	-1.68	-1.16	-0.62	-0.77	-1.99	-0.87	-0.57	-0.19	-0.19	-0.3725	-0.22	0.559041	0.297755	0.619252	0.999971	1	0.929184
Aurkaip1	Q9DCJ7	1.08	0.15	-0.3	-0.76	-0.81	-0.16	0.02	-0.22	-0.69	0.17	1.39	1.33	0.58	1	1.07	0.71	-0.335	0.5075	0.7975	0.423871	0.395865	0.0690449	0.999971	1	0.733937
Aven	A2AGL5	1.14	0.7	-0.42	-0.49	-0.85	0.52	-0.23	-0.89	0.29	0.94	0.15	0.63	0.45	0.15	-0.21	-0.33	-0.595	0.27	-0.2175	0.242503	0.527585	0.608745	0.999971	1	0.926608
Avl9	Q80U56	-1.27	-0.52	-0.99	-1.38	-0.52	-0.53	-0.55	-1.28	-0.39	-0.95	-0.95	-0.94	-0.35	-0.85	-0.98	-1.31	0.32	0.2325	0.1675	0.274783	0.380731	0.566495	0.999971	1	0.917959
AW209491	Q91WD4	2.47	0.89	1.98	1.96	-0.41	1.6	3.52	0.44	0.31	1.49	1.44	0.17	0.4	0.36	0.92	-0.25	-0.5375	-0.9725	-1.4675	0.517278	0.0593522	0.00470994	0.999971	1	0.582714
AW551984	Q8BGF0	-1.22	-1.55	-0.81	-0.88	-0.44	-1.42	-0.96	0.06	-0.16	-0.84	-1.13	0.51	0.63	0.18	1.11	-0.48	0.425	0.71	1.475	0.250946	0.0961106	0.00314066	0.999971	1	0.577271
Axl	Q6PE80	-1.05	-0.42	-1.54	-1.3	-0.65	-0.62	-0.54	-1.53	-0.03	-0.82	-1.23	-1.19	0.12	-0.55	-0.56	-0.54	0.2425	0.26	0.695	0.473756	0.476817	0.0440486	0.999971	1	0.70308
Azi2	Q9QYP6	2.33	-0.29	0.25	0.47	-0.25	0.31	0.93	0.02	-0.24	1.56	0.2	-0.06	-0.42	-0.1	-0.01	-0.1	-0.4375	-0.325	-0.8475	0.451102	0.614571	0.138055	0.999971	1	0.784948
B2m	P01887	1.55	1.04	1.1	1.63	2.5	0.14	1.93	0.93	2.63	0.47	1.63	3.04	1.8	0.24	1.17	1.17	0.045	0.6125	-0.235	0.928964	0.281456	0.507547	0.999971	1	0.905815
B3galnt1	Q920V1	-1.75	-1.27	-0.44	-0.22	-0.75	-1.35	-1.06	0.34	-0.95	-2.05	-0.35	-0.46	-1.57	-0.82	0.31	0.1	0.215	-0.0325	0.425	0.654977	0.947338	0.423139	0.999971	1	0.87887
B3galt5	Q9JI67	3.11	1.63	1.42	1.73	0.84	1.11	1.09	1.75	1.5	1.17	1.7	2.38	-0.11	1.27	1.64	0.83	-0.775	-0.285	-1.065	0.0859269	0.519494	0.0585782	0.999971	1	0.725348
B3galt6	Q91Z92	0.69	0.57	0.89	0.97	0.3	0.89	0.37	0.15	0.68	0.31	0.93	0.62	0.66	1.05	0.92	0.98	-0.3525	-0.145	0.1225	0.144322	0.488014	0.528118	0.999971	1	0.909725
B3gat3	P58158	1.7	1.02	0.85	1.03	1.21	1.13	0.71	1.29	0.97	1.31	1.2	0.72	0.07	0.71	0.88	0.76	-0.065	-0.1	-0.545	0.798315	0.694182	0.0769912	0.999971	1	0.750479
B3glct	Q8BHT6	-0.71	0.3	0.28	0.65	0.12	-0.09	0.2	0.82	0.13	-0.12	0.72	0.18	0.13	0.41	0.69	1.09	0.1325	0.0975	0.45	0.703265	0.773814	0.22215	0.999971	1	0.827753
B4galnt1	Q09200	0.12	0.98	0.23	0.7	0.98	0.73	-0.06	0.84	0.63	0.15	0.67	0.8	0.77	1.01	0.82	0.8	0.115	0.055	0.3425	0.713828	0.836229	0.180609	0.999971	1	0.808532
B4galnt4	Q766D5	0.99	-1.26	-2.71	-1.39	1.1	-2.22	-0.87	-0.38	0.49	-1.55	-0.14	-0.8	-6.67	-3.66	-0.4	-3.54	0.5	0.5925	-2.475	0.589856	0.466071	0.0895767	0.999971	1	0.771991
B4galt3	Q91YY2	-0.72	-0.11	-0.36	-0.59	-0.12	-0.48	-0.82	-1.03	0.2	-0.28	-0.24	0.01	0.35	0.19	-0.19	-0.09	-0.1675	0.3675	0.51	0.528571	0.118171	0.0465123	0.999971	1	0.710102
B4galt7	D3Z065	0.9	-1.91	-0.58	-0.39	-1.42	-1.24	1.72	-0.81	-1.54	-0.6	-1.04	-1.32	-2.65	-1.77	-1.15	-1.31	0.0575	-0.63	-1.225	0.944967	0.28038	0.070526	0.999971	1	0.735439
B4gat1	Q8BWP8	-0.06	1.68	1.38	1.02	1.57	1.87	1.09	1.27	1.82	0.41	1.33	0.81	1.8	1.71	1.24	1.62	0.445	0.0875	0.5875	0.281543	0.848932	0.153257	0.999971	1	0.795578
B630019K06Rik	Q7TNS5	-1.89	-1.92	-1.52	-1.44	-1.51	-2.09	-1.64	-1.75	-1.68	-1.95	-2.1	-1.94	-1.39	-1.53	-1.64	-1.65	-0.055	-0.225	0.14	0.802471	0.284911	0.487305	0.999971	1	0.897906
B9d1	Q5NCM9	-1.24	-0.8	0.64	0.51	-0.76	-1.27	-0.5	1.14	-1.21	-3.67	0.34	0.72	-0.68	-0.9	1.12	0.17	-0.125	-0.7325	0.15	0.844549	0.466988	0.80301	0.999971	1	0.971467
Baalc	Q8VHV1	-2.79	-0.67	0.13	0.16	-0.54	-0.62	0.55	-0.04	-0.64	-2.72	0.37	0.54	-0.74	-1.11	-0.23	0.14	0.63	0.18	0.3075	0.36195	0.844829	0.651262	0.999971	1	0.933842
Babam1	Q3UI43	0.77	0.77	1.04	1.3	0.55	0.7	1.46	1.17	0.79	1.06	1.23	0.6	0.97	0.89	0.8	0.92	-3.92523e-17	-0.05	-0.075	1	0.825124	0.702341	1	1	0.949019
Babam2	Q8K3W0	0.57	0.54	0.34	0.63	0.71	0.84	0.31	0.54	0.69	0.56	0.35	0.36	0.73	0.86	0.45	0.67	0.08	-0.03	0.1575	0.681566	0.86607	0.399684	0.999971	1	0.871816
Bace1	P56818	-0.1	-1.51	-0.79	-0.41	-1.09	-0.95	-0.42	-0.47	-1.07	-0.14	-0.74	-1.07	-1.82	-1.28	-0.7	-1.22	-0.03	-0.0525	-0.5525	0.93028	0.885695	0.161137	0.999971	1	0.800215
Bad	Q61337	0.25	-0.33	0.28	1.12	-0.2	0.1	1.25	0.64	0.04	0.54	-0.31	-0.41	-1	-0.17	-0.1	-0.46	0.1175	-0.365	-0.7625	0.777343	0.324758	0.0568368	0.999971	1	0.725348
Bad_1	Q3U9H3	0.73	-0.19	-1.98	-2.04	-0.75	-0.36	-1.09	-1	-0.87	0.11	-0.81	-0.46	-0.78	0.32	-1.41	-1.48	0.07	0.3625	0.0325	0.912749	0.584849	0.964181	0.999971	1	0.998721
Bag1	F6TCF9	-0.5	0.55	-0.51	-0.3	0.63	0.46	-0.8	0.1	0.72	-0.13	-0.19	-0.3	0.77	0.54	-0.37	-0.42	0.2875	0.215	0.32	0.467906	0.532092	0.413281	0.999971	1	0.876261
Bag2	Q91YN9	0.35	-0.34	-0.97	-0.87	-0.5	-0.19	-0.11	-1.3	-0.46	0.14	-1.14	-1.23	-1.14	-0.78	-0.85	-1.66	-0.0675	-0.215	-0.65	0.862686	0.611104	0.0953471	0.999971	1	0.78268
Bag3	Q9JLV1	2.65	0.67	0.42	0.72	0.69	0.97	0.51	0.66	0.7	1.82	0.26	0.07	0.17	0.64	0.76	0.15	-0.4075	-0.4025	-0.685	0.412993	0.504616	0.195062	0.999971	1	0.811225
Bag4	Q8CI61	1.55	1.06	2.14	1.9	1.72	0.55	4.86	0.53	2.92	0.83	2.66	3.07	2.4	-0.24	0.83	0.71	0.2525	0.7075	-0.7375	0.787504	0.204295	0.20132	0.999971	1	0.815758
Bag5	Q8CI32	0.07	-0.17	-0.28	-0.35	-0.27	-0.7	-0.56	-0.3	-0.51	-0.33	-0.37	-0.2	-0.36	0.18	-0.23	-0.19	-0.275	-0.17	0.0325	0.189246	0.362159	0.873472	0.999971	1	0.984109
Bag6	Q3UF95	-0.21	0.37	0.17	0.14	0.4	0.04	0.11	0.09	0.32	-0.19	-0.04	0.15	0.5	0.2	0.07	-0.11	0.0425	-0.0575	0.0475	0.833451	0.784848	0.829704	0.999971	1	0.978384
Baiap2	Q8BKX1-2	-1.14	-1.13	-1.33	-1.29	-0.94	-1.07	-0.79	-1.14	-0.85	-1.21	-1.07	-0.89	-0.31	-1.12	-1.28	-1.2	0.2375	0.2175	0.245	0.201182	0.235608	0.35246	0.999971	1	0.867768
Baiap3	S4R1K2	0.45	-2.26	-0.14	-0.3	-0.28	-0.99	-1.01	0.17	0.34	-0.05	-1.73	0.52	-0.23	0.43	1.64	-1.14	0.035	0.3325	0.7375	0.953259	0.641776	0.338462	0.999971	1	0.8595
Bak1	O08734	0.73	0.33	-0.32	-0.5	0.87	0.91	-0.72	-0.37	1.23	1.21	-0.66	-0.09	0.54	1.25	-0.94	0.31	0.1125	0.3625	0.23	0.812542	0.487924	0.647403	0.999971	1	0.933613
Banf1	O54962	-1.12	-0.76	-0.79	-0.81	-0.56	-0.86	0.28	-1.22	-0.55	-1.31	-1.6	-1.12	-0.21	-0.48	-0.55	-1.24	0.28	-0.275	0.25	0.406039	0.304285	0.348365	0.999971	1	0.864885
Basp1	Q91XV3	0.37	-1.78	-1.23	-0.73	-1.91	-1.53	-0.31	-1.5	-1.85	-0.9	-1.59	-1.97	-1.99	-1.88	-1.58	-1.61	-0.47	-0.735	-0.9225	0.385525	0.154297	0.062525	0.999971	1	0.725348
Bax	A0A1B0GT81	-0.01	0.81	-0.01	0.51	0.77	0.46	-0.08	0.24	0.7	0.4	0.55	0.24	0.96	0.7	0.29	0.48	0.0225	0.1475	0.2825	0.93691	0.560625	0.309908	0.999971	1	0.847402
Baz1b	Q9Z277	-0.98	-1.08	-0.94	-0.8	-1.07	-1.27	-0.61	-1.03	-1.22	-1.17	-0.91	-1.04	-0.78	-1.16	-1.16	-1.23	-0.045	-0.135	-0.1325	0.826157	0.441552	0.487831	0.999971	1	0.897906
Baz2a	F8VPM0	0.83	-2.31	-0.72	-1.02	-1.95	-2.42	-1.05	-2.35	-1.75	0.36	-2.41	-2.93	-4.11	-3.24	-1.17	-2.67	-1.1375	-0.8775	-1.9925	0.108143	0.329816	0.0331029	0.999971	1	0.685881
Bbln	P58686	-0.1	0.51	-0.07	-0.53	-0.14	1	-0.53	0.22	0.28	-1	-0.25	-0.77	0.54	0.73	-1.03	0.37	0.185	-0.3875	0.2	0.625413	0.286078	0.643873	0.999971	1	0.93301
Bbs1	Q3V3N7	-1.06	-0.2	-0.08	-0.03	-0.07	-0.55	-0.45	-0.21	-0.39	-0.8	-0.4	-0.07	-0.65	0	-0.12	-0.26	0.0225	-0.0725	0.085	0.936062	0.80528	0.771359	0.999971	1	0.963498
Bbs2	Q9CWF6	0.37	0.23	0.34	0.1	0.42	0.34	-0.02	0.21	0.53	0.69	-0.62	0.46	0.25	0.52	0.49	0	-0.0225	0.005	0.055	0.903596	0.98711	0.780954	0.999971	1	0.965859
Bbs4	Q8C1Z7	0.89	0.18	-0.19	-0.72	0.22	-0.19	0.91	-0.12	0.18	0.63	0.25	0.59	0.61	0.73	-0.14	-0.19	0.165	0.3725	0.2125	0.68302	0.304829	0.597188	0.999971	1	0.92377
Bbs5	A2AUC6	-1.44	-0.2	-0.66	0.5	-0.61	0.58	-0.85	-0.57	-0.98	-2.73	-0.39	-0.29	0.41	-0.99	-0.76	-0.42	0.0875	-0.6475	0.01	0.855962	0.324316	0.983224	0.999971	1	0.99925
Bbs7	E9Q0R0	0.39	0.31	0.74	0.69	0.38	0.12	0.37	1.02	-0.06	0.16	0.37	0.72	-0.3	0.48	0.86	0.84	-0.06	-0.235	-0.0625	0.80942	0.32525	0.835341	0.999971	1	0.979185
Bbs9	Q811G0-2	-1.3	0.14	-1.56	-1.3	0.02	-0.42	-1.67	-1.68	0.26	-0.71	-1.32	-1.05	0.12	-0.15	-0.87	-1.17	0.0675	0.3	0.4875	0.899702	0.540245	0.305123	0.999971	1	0.847402
BC004004	A0A3Q4L2X7	0.45	0.24	-1.02	-0.86	0.22	0.67	-0.61	-0.62	0.17	0.73	-0.93	-0.91	1.03	0.92	-0.44	-0.46	0.2125	0.0625	0.56	0.646615	0.903752	0.294242	0.999971	1	0.847402
BC024978	D3Z7G4	-1.21	-0.11	-0.12	-0.57	0.38	-0.71	-0.45	-0.09	0.04	-0.88	0.37	0.93	0.03	-0.86	0.31	0.04	0.285	0.6175	0.3825	0.418794	0.180422	0.299785	0.999971	1	0.847402
Bcam	Q9R069	0.6	0.68	0.19	0.66	1.81	0.21	-0.03	0.13	0.37	1.56	0.69	1.18	-0.23	0.64	0.67	0.14	-0.0025	0.4175	-0.2275	0.995263	0.182736	0.403242	0.999971	1	0.873348
Bcan	Q61361	0.99	1.52	1.24	1.33	1.41	1.41	1.13	1.33	1.12	0.86	0.83	0.74	0.97	1.23	1.08	1.32	0.05	-0.3825	-0.12	0.795769	0.0763827	0.546677	0.999971	1	0.911398
Bcap29	Q61334	0.12	-0.74	-0.18	0.22	-0.14	-0.76	0.45	-0.15	0.68	-0.93	0.16	0.16	-0.44	-1.56	-0.4	0.39	-0.005	0.1625	-0.3575	0.98782	0.676204	0.416334	0.999971	1	0.877131
Bcap31	Q61335	0.26	-0.56	-0.06	0.17	-0.39	-0.2	0.31	-0.2	-0.43	0.2	-0.44	-0.25	-0.66	-0.55	-0.19	-0.15	-0.0725	-0.1825	-0.34	0.781066	0.487428	0.199895	0.999971	1	0.813335
Bcar1	Q61140	0.34	-0.36	-0.68	-0.61	-0.38	-0.45	-0.9	-0.76	-0.45	-0.02	-0.74	-0.83	-0.61	-0.25	-0.8	-0.6	-0.295	-0.1825	-0.2375	0.306814	0.550621	0.401418	0.999971	1	0.871816
Bcar3	Q9QZK2	0.61	-0.36	0.03	0.23	-0.87	-0.45	0.28	-0.05	-0.44	0.04	0.04	-0.26	-0.45	-0.24	0.02	-0.03	-0.4	-0.2825	-0.3025	0.234998	0.288916	0.255454	0.999971	1	0.839012
Bcas1	Q80YN3	-0.56	-1.16	-0.75	-0.71	-1.47	-0.86	-0.29	-1.13	-1.15	-1.19	-1.48	-1.24	-1.05	-1.05	-0.83	-1.31	-0.1425	-0.47	-0.265	0.627357	0.0416111	0.232013	0.999971	1	0.831121
Bcas2	Q9D287	-0.11	0.2	0.45	0.78	0.13	-0.14	0.35	0.58	0.24	-0.05	0.43	0.33	0.05	0.41	0.37	0.64	-0.1	-0.0925	0.0375	0.70674	0.705291	0.881786	0.999971	1	0.986206
Bcas3	B1AR74	-0.52	-0.24	-0.55	-0.76	-0.14	-0.22	-0.45	-0.65	0.04	-0.34	-0.61	-0.69	-0.03	-0.45	-0.81	-0.9	0.1525	0.1175	-0.03	0.472022	0.613431	0.905426	0.999971	1	0.991091
Bcas3_1	Q8CCN5	2.82	-0.26	-0.75	-0.78	-0.79	-0.16	-1.23	-0.46	-1	0.67	-1.44	-0.63	-0.23	0.2	-0.65	-0.51	-0.9175	-0.8575	-0.555	0.2706	0.343269	0.491057	0.999971	1	0.898873
Bcat1	Q8CBC8	0.42	0.11	-0.55	-0.48	0.28	0.4	-0.43	-0.25	0.3	0.19	-0.45	-0.09	0.09	0.72	-0.33	-0.51	0.125	0.1125	0.1175	0.690861	0.705479	0.740344	0.999971	1	0.960899
Bcat2	O35855	-0.89	0.4	0.05	-0.12	0.3	0.53	-0.21	0.25	0.35	0.03	0.65	0.15	0.57	0.67	0.56	0.36	0.3575	0.435	0.68	0.276533	0.183781	0.0421022	0.999971	1	0.701725
Bccip	Q9CWI3	1.65	3.05	1.98	1.78	2.5	2.9	1.82	1.64	2.98	2.14	1.83	1.12	0.68	1.62	1.42	1.72	0.1	-0.0975	-0.755	0.808566	0.835476	0.0753766	0.999971	1	0.746958
Bckdha	Q3U3J1	0.7	-0.5	-0.61	-0.51	-0.78	-0.67	-0.53	-0.39	-0.7	-0.04	-0.59	-0.6	-0.21	-0.36	-0.73	-0.5	-0.3625	-0.2525	-0.22	0.279951	0.466619	0.510651	0.999971	1	0.905815
Bckdhb	Q6P3A8	1.33	1.01	1.48	1.3	0.64	0.66	0.53	1.94	0.73	1.14	1.33	-0.73	1.55	1.04	1.51	1.31	-0.3375	-0.6625	0.0725	0.339359	0.166068	0.726556	0.999971	1	0.956041
Bckdk	A0A0U1RNL7	-0.03	-0.34	0.23	0.05	-0.28	-0.38	0.45	0.47	-0.68	-0.49	0.61	0.44	-0.41	-0.36	0.37	0.27	0.0875	-0.0075	-0.01	0.75113	0.982475	0.969394	0.999971	1	0.998787
Bcl10	Q9Z0H7	0.54	0.87	0.55	0.84	0.45	0.79	0.65	0.67	1.09	0.73	0.43	0.32	0.3	1.18	1.28	1	-0.06	-0.0575	0.24	0.747469	0.802534	0.371573	0.999971	1	0.869526
Bcl11a	Q5STS9	0.74	1.35	1.23	1.19	1.61	1.56	1.05	1.08	1.18	0.94	0.61	0.47	1.04	1.04	0.5	1.01	0.1975	-0.3275	-0.23	0.412364	0.194746	0.328113	0.999971	1	0.856472
Bcl11b	A0A0R4J1E1	2.73	0.16	0.36	0.62	-0.26	0.65	2.22	0.2	-0.39	1.62	0.06	-0.76	-0.79	-0.51	-0.28	-0.71	-0.265	-0.835	-1.54	0.715299	0.26521	0.0208454	0.999971	1	0.635402
Bcl2	P10417-2	-1.06	-0.56	-2.87	-3.7	-0.56	-0.35	-2.03	-4.82	-0.55	-0.58	-2.38	-2.67	-0.87	0.24	-2.87	-0.19	0.1075	0.5025	1.125	0.924097	0.555704	0.23534	0.999971	1	0.832918
Bcl2l1	A2AHX9	-0.28	0.12	-0.08	0.43	0.39	0.3	-0.27	0.47	0.03	-0.14	0.16	0.48	0.34	0.72	0.57	0.67	0.175	0.085	0.5275	0.494591	0.716817	0.0368666	0.999971	1	0.700096
Bcl2l13	P59017	-0.56	-1.64	-1.33	-0.96	-1.81	-1.6	-0.85	-1.54	-1.72	-1.11	-1.59	-1.21	-1.68	-1.48	-1.11	-0.82	-0.3275	-0.285	-0.15	0.315305	0.335372	0.628984	0.999971	1	0.932176
Bcl7a	Q9CXE2	1.5	1.84	1.84	2.03	1.98	1.79	1.41	2.13	2.01	1.57	1.95	2.01	1.77	2.02	1.67	2.11	0.025	0.0825	0.09	0.913097	0.686841	0.663697	0.999971	1	0.936621
Bcl7b	Q921K9	0.43	1.31	0.43	0.91	1.61	1.14	0.22	1.07	0.92	0.69	0.62	0.32	1.12	1.02	0.51	1.11	0.24	-0.1325	0.17	0.501336	0.620111	0.541555	0.999971	1	0.910988
Bclaf1	Q8K019-2	0.26	-0.7	-0.47	-0.24	-0.18	-0.26	0.35	-0.08	-0.63	-0.1	-0.45	-0.53	-0.49	-0.34	-0.28	-0.05	0.245	-0.14	-0.0025	0.370238	0.590263	0.99209	0.999971	1	0.99925
Bcr	Q6PAJ1	-0.08	-0.66	-0.4	-0.22	-0.5	-0.82	-0.37	-0.22	-0.62	-0.43	-0.49	-0.24	-0.85	-0.47	-0.2	-0.26	-0.1375	-0.105	-0.105	0.539587	0.604009	0.6517	0.999971	1	0.933842
Bcs1l	Q9CZP5	-1.41	-1.17	-0.73	-0.74	-0.7	-1.43	-1.06	-0.63	-0.87	-2.23	-0.92	-0.95	-1.18	-1.48	-0.73	-0.96	0.0575	-0.23	-0.075	0.830691	0.529215	0.770972	0.999971	1	0.963498
Bdh1	Q80XN0	-1.28	-0.71	-0.81	-0.73	-0.92	-0.78	-0.63	-0.4	-0.62	-0.97	-0.38	-0.68	-0.23	-0.57	-0.54	-0.14	0.2	0.22	0.5125	0.372678	0.333495	0.0409459	0.999971	1	0.700838
Bdnf	H9H9S8	-2.09	-1.37	-0.21	-0.9	-0.69	-0.27	-0.09	-1.74	-0.04	-0.87	0.04	-1.39	-3.15	-1.79	-1.16	-2.25	0.445	0.5775	-0.945	0.38601	0.257309	0.103136	0.999971	1	0.78268
Becn1	O88597	0.59	-0.53	0.45	0.44	-0.57	-0.18	0.61	0.22	-0.44	-0.34	0.25	0.19	-0.55	-0.76	0.34	0.21	-0.2175	-0.3225	-0.4275	0.544198	0.322682	0.262184	0.999971	1	0.842262
Begain	F8WIG2	-0.12	-1.2	-0.53	-0.72	-1.26	-1.25	-0.33	-1.14	-1.12	-0.77	-0.53	-0.98	-1.27	-1.83	-1.36	-1.33	-0.3525	-0.2075	-0.805	0.286013	0.457278	0.0162723	0.999971	1	0.613095
Bet1	O35623	-0.09	-0.97	-1.54	-1.44	-2.06	-1.16	-1.53	-1.29	-1.7	-0.54	-2.31	-1.47	0.54	-1.18	-1.08	-1.32	-0.5	-0.495	0.25	0.20368	0.302724	0.62473	0.999971	1	0.930479
Bex2	Q9WTZ8	1.13	-0.31	3.15	2.79	0.99	0.42	4.33	1.73	1.27	1.78	2.05	1.47	0.65	0.32	1.22	-0.15	0.1775	-0.0475	-1.18	0.865504	0.948876	0.149448	0.999971	1	0.793248
Bfar	A0A0R4J040	-0.27	-0.31	-0.62	-0.88	-0.41	-0.36	-0.44	-0.48	-0.24	-0.35	-0.2	-0.2	0.26	-0.02	0.18	-0.07	0.0975	0.2725	0.6075	0.631589	0.197794	0.0180032	0.999971	1	0.635388
Bgn	P28653	0.56	1.59	0.56	-0.1	6.66	1.97	0.37	-0.31	2.94	2.58	1.62	3.78	1.56	1.88	0.67	-0.11	1.52	2.0775	0.3475	0.302556	0.00346825	0.514367	0.999971	0.957868	0.905815
Bhlhe23	Q8BGW3	-0.51	-1.15	-0.95	-2.15	-0.69	-1.2	1.07	-1.79	-0.87	-2.08	-1.39	-0.7	-0.23	-2.08	-1.66	-2.38	0.5375	-0.07	-0.3975	0.412394	0.873566	0.470875	0.999971	1	0.892857
Bicd1	G3UXK5	-0.57	-0.85	-0.32	-0.71	-0.88	-0.75	-0.14	-0.22	-0.82	-0.34	0.54	0.3	-0.57	-0.63	-0.35	-0.37	0.115	0.5325	0.1325	0.643364	0.132086	0.505	0.999971	1	0.905277
Bicd2	Q921C5	-0.9	-0.93	-0.12	-0.17	-1.22	-1.57	-0.15	0.24	-1.23	-1.16	0.2	0.55	-1.21	-0.98	-0.08	0.28	-0.145	0.12	0.0325	0.749654	0.801834	0.935484	0.999971	1	0.995618
Bicra	F8VPZ9	2.07	1.35	0.56	1.6	1.51	1.71	1.56	1.21	1.07	0.93	0.51	-0.64	1.58	1.71	0.25	-0.29	0.1025	-0.9275	-0.5825	0.757685	0.0751985	0.297512	0.999971	1	0.847402
Bicral	Q8CHH5	-0.04	0.77	0.41	0.51	-0.27	0.43	-0.87	-0.6	-0.57	-0.85	-0.2	-0.13	0.17	-0.7	-0.46	-0.43	-0.74	-0.85	-0.7675	0.0471682	0.00937571	0.0184146	0.999971	1	0.635388
Bid	P70444	0.23	0.49	-0.45	-0.01	1.15	0.33	-0.47	0.65	0.64	0.54	-0.18	0	0.93	1.07	0.22	0.58	0.35	0.185	0.635	0.369291	0.532521	0.0521186	0.999971	1	0.723736
Bin1	O08539	-0.93	-1.23	-0.35	-0.74	-1.24	-0.95	-0.48	-0.56	-1.07	-1.17	-0.47	-0.32	-1.14	-1.04	-0.37	-0.7	0.005	0.055	2.15888e-16	0.985395	0.850373	1	0.999971	1	1
Bin2	S4R270	1.49	0.81	0.49	1.07	1.29	1.17	1.11	0.42	1.08	0.86	0.51	0.38	0.21	0.66	0.87	0.64	0.0325	-0.2575	-0.37	0.912974	0.369107	0.197075	0.999971	1	0.812891
Bin3	Q9JI08	-0.27	-0.17	-0.07	0.05	-0.33	-0.74	-0.16	0.25	-0.54	-0.72	0.32	0.1	-0.28	-0.58	0.43	0.81	-0.13	-0.095	0.21	0.599991	0.730136	0.525768	0.999971	1	0.909459
Birc2	Q62210	0.44	-0.36	0.53	0.89	-0.08	0.16	0.01	0.54	-0.09	0.3	0.11	0.29	-0.55	0.09	0.24	0.66	-0.2175	-0.2225	-0.265	0.480901	0.450732	0.465027	0.999971	1	0.89116
Birc6	O88738	0.47	0.19	0.58	0.39	0.14	0.18	0.37	0.43	0.17	0.35	0.53	0.28	0.12	0.14	0.3	0.58	-0.1275	-0.075	-0.1225	0.492905	0.681086	0.538145	0.999971	1	0.910077
Bivm	Q8CBX9	1.79	1.08	0.98	0.72	0.98	0.02	0.91	1.11	2.17	-2.46	0.95	1.65	4.24	-0.95	0.03	0.22	-0.3875	-0.565	-0.2575	0.266493	0.560445	0.805451	0.999971	1	0.971701
Bles03	Q8VD62	0.74	0.84	0.82	0.73	0.76	0.99	0.5	0.9	0.77	0.41	0.62	0.63	0.66	0.99	0.69	0.86	0.005	-0.175	0.0175	0.978325	0.312628	0.919444	0.999971	1	0.992633
Blmh	Q8R016	0.01	0.23	-0.02	0.21	0.31	0.4	0.24	0.31	0.35	0.11	0.03	-0.21	0.38	0.78	0.17	0.2	0.2075	-0.0375	0.275	0.240511	0.84548	0.208639	0.999971	1	0.822138
Bloc1s1	O55102	-0.52	-0.2	-0.64	0.11	-0.19	0.29	-0.77	0.29	-0.16	-0.38	-0.47	-0.25	0.02	0.15	-0.06	0.01	0.2175	-0.0025	0.3425	0.487359	0.990993	0.145001	0.999971	1	0.79148
Bloc1s2	Q9CWG9	1.88	1.03	0.81	0.86	0.65	1.26	0.57	0.61	0.65	1.59	0.17	0.7	1.15	1.07	0.54	1.05	-0.3725	-0.3675	-0.1925	0.242004	0.34145	0.520874	0.999971	1	0.906972
Bloc1s4	Q8VED2	0.99	-1.14	0.61	1.58	-0.79	-0.69	1.23	1.81	-0.74	0.33	1.76	1.09	-1.63	-1.21	0.79	-0.74	-0.12	0.1	-1.2075	0.879945	0.889701	0.117746	0.999971	1	0.78268
Blvra	Q9CY64	-0.38	0.72	0.33	0.12	0.53	0.25	0	-0.07	0.52	-0.29	0.45	0.53	0.61	0.45	0.24	0.46	-0.02	0.105	0.2425	0.943296	0.734018	0.370338	0.999971	1	0.869526
Blvrb	Q923D2	1.08	0	-0.47	0.81	0.2	0.06	0.91	-0.18	-0.84	-0.5	-0.3	-0.35	-0.04	-0.98	-0.21	-0.16	-0.1075	-0.8525	-0.7025	0.792273	0.0435067	0.106397	0.999971	1	0.78268
Bmerb1	Q8R1Y2	-0.87	-1.53	-0.83	-0.8	-1.07	-1.01	-1.06	-0.34	-0.83	-0.8	-0.96	-1.31	-0.88	-0.52	-0.1	-0.28	0.1375	0.0325	0.5625	0.611381	0.892389	0.0588886	0.999971	1	0.725348
Bmp2k	Q91Z96	0.18	-1.22	-0.94	-0.52	-1.63	-1.72	-0.84	-0.82	-1.9	-0.76	-0.83	-0.58	-1.9	-1.11	-1.29	-0.76	-0.6275	-0.3925	-0.64	0.123455	0.349196	0.115482	0.999971	1	0.78268
Bmpr1a	Q60607	-1.6	0.04	-0.95	-1.15	0	-0.63	-1.7	-0.62	-0.03	-1.16	-0.62	-0.97	1.08	-0.33	-0.76	-1.03	0.1775	0.22	0.655	0.702135	0.592174	0.243453	0.999971	1	0.837316
Bmpr1b	P36898	-0.73	-2.54	-0.26	0.09	0.31	-0.53	-1.19	0.06	-1.37	-0.34	-1.77	-0.23	-0.21	-1.09	-0.92	-0.08	0.5225	-0.0675	0.285	0.404376	0.915677	0.627324	0.999971	1	0.931025
Bmpr2	O35607	-1.08	-0.91	-0.66	-0.51	-0.89	-0.78	-0.6	-0.42	-0.67	-0.56	-0.47	-0.67	-0.51	-0.79	-0.68	-0.48	0.1175	0.1975	0.175	0.583615	0.323831	0.399817	0.999971	1	0.871816
Bms1	Q6PGF5	-1.69	-1.95	-1.23	-1.61	-1.75	-2.46	-1.51	-1.88	-1.71	-1.65	-0.83	-1.54	-1.41	-1.74	-1.23	-1.84	-0.28	0.1875	0.065	0.314952	0.493793	0.786525	0.999971	1	0.967132
Bmt2	A0A0N4SUJ1	1.52	-0.04	0.85	0.76	0.56	0.62	1.68	0.86	0.55	1.16	1.11	0.74	1.07	0.96	0.65	0.35	0.1575	0.1175	-0.015	0.690316	0.735264	0.966022	0.999971	1	0.998721
Bnip1	Q6QD59	0.23	-0.8	0.08	0.11	-0.78	-0.27	-0.41	0.04	-1.07	-0.36	0.02	0.04	-0.85	-0.53	0.4	0.78	-0.26	-0.2475	0.045	0.396833	0.481541	0.916043	0.999971	1	0.992633
Bnip2	Q91VL0	-4.2	-6.01	-5.39	-4.43	-4.38	-6.82	-4.1	-4.69	-5.72	-5.17	-4.04	-3.88	-6.19	-5.18	-3.52	-5.06	0.01	0.305	0.02	0.988227	0.59239	0.974732	0.999971	1	0.99925
Bnip3	O55003	2.54	0.25	-0.06	0.48	-0.56	-0.5	0.81	-0.62	-0.62	1.13	0	0.22	-0.31	-0.36	-0.61	-0.12	-1.02	-0.62	-1.1525	0.127493	0.341389	0.0619518	0.999971	1	0.725348
Bnip3l	Q9Z2F7	-0.6	-0.11	-0.55	-0.66	0.44	0.8	-0.39	-0.78	1.2	0.57	-0.92	-0.95	2.2	0.32	-0.65	-0.1	0.4975	0.455	0.9225	0.20515	0.388846	0.137555	0.999971	1	0.784948
Boc	D3Z763	2	0.4	1.81	2.08	-0.42	1.01	1.95	2.41	0.5	1.36	0.72	1.65	-1.22	0.37	2.48	1.97	-0.335	-0.515	-0.6725	0.619177	0.271334	0.427913	0.999971	1	0.880793
Bod1	Q5SQY2	0.59	1.69	0.97	0.89	1.88	1.93	1.16	0.67	1.75	1.43	1.44	1.8	1.43	1.99	1.19	1.63	0.375	0.57	0.525	0.326268	0.0607512	0.105497	0.999971	1	0.78268
Bod1l	E9Q6J5-2	4.47	2.53	2.5	2.77	2.61	3.11	2.31	2.48	2.44	3.19	2.3	2.16	1.76	1.78	2.01	1.92	-0.44	-0.545	-1.2	0.360237	0.283371	0.0238009	0.999971	1	0.664227
Bok	O35425	0.96	1.14	1.92	1.45	0.69	0.21	1.29	0.24	0.62	1	0.77	-0.53	-0.68	-0.46	1.09	0.63	-0.76	-0.9025	-1.2225	0.0430762	0.0419977	0.0218862	0.999971	1	0.645537
Bola1	Q9D8S9	-1.04	-1.51	-1.32	-1.63	-1.21	-1.64	-1.26	-2.05	-1.44	-1.38	-1.04	-1.4	-2.02	-1.76	-1.49	-1.4	-0.165	0.06	-0.2925	0.527455	0.772312	0.223993	0.999971	1	0.828225
Bola2	Q8BGS2	0.29	0.44	0.44	0.13	0.38	0.72	0.04	1.08	0.25	0.41	0.48	0.27	0.1	1.26	0.95	0.62	0.23	0.0275	0.4075	0.385733	0.873705	0.165674	0.999971	1	0.800215
Bola3	E9Q705	-1.63	-3.74	-0.14	0.42	-3.62	-3.55	0.27	0.55	-2.96	-2.57	-0.38	0.21	-4.88	-2.68	-0.11	0.02	-0.315	-0.1525	-0.64	0.81089	0.88897	0.631796	0.999971	1	0.932858
Bop1	P97452	0.5	0.92	0.5	0.55	0.93	0.3	0.17	0.7	0.85	0.51	0.91	1.03	0.87	0.45	0.66	0.32	-0.0925	0.2075	-0.0425	0.697715	0.320499	0.839461	0.999971	1	0.979728
Borcs5	E9Q2W8	-0.27	0.52	0.44	0.22	0.09	0.25	-0.15	0.33	-0.01	0.14	0.24	-0.26	0.4	-0.05	0.26	0.1	-0.0975	-0.2	-0.05	0.685356	0.412264	0.83337	0.999971	1	0.979036
Borcs6	Q9D6W8	-0.06	0.61	0.91	0.9	0.48	0.04	0.4	1.26	0.23	-0.27	0.5	0.05	0.98	0.49	0.8	1.19	-0.045	-0.4625	0.275	0.894549	0.137491	0.34901	0.999971	1	0.865162
Borcs7	Q9CRC6	-0.35	-0.09	-1.59	-1.14	0.09	0	-1.38	-1.21	-0.53	-0.19	-1.94	-1.12	0.76	-0.01	-0.86	-0.07	0.1675	-0.1525	0.7475	0.730414	0.752988	0.124687	0.999971	1	0.78268
Borcs8	Q9D6Y4	-1.93	-0.11	0.57	0.54	0.47	-0.28	-0.1	0.71	0.06	-0.62	0.11	0.79	0.39	0.85	0.51	0.7	0.4325	0.3175	0.845	0.461635	0.59982	0.149698	0.999971	1	0.793248
Bpgm	P15327	-0.55	-1.13	-0.02	0.49	-0.08	-1.06	1.09	0.11	-0.43	-1.15	0.41	0.19	-0.69	-1.35	-0.22	0.49	0.3175	0.0575	-0.14	0.544646	0.901286	0.773454	0.999971	1	0.963759
Bphl	Q8R164	-0.82	-0.25	0.48	-0.15	-0.24	-0.51	0.34	0.36	-0.23	-0.89	0.58	0.85	-0.11	-0.67	0.3	-0.1	0.1725	0.2625	0.04	0.614092	0.563346	0.904097	0.999971	1	0.991091
Bpnt1	Q9Z0S1	-1.46	1.25	0.04	0.09	1.49	0.25	-0.16	-0.11	1.35	-0.21	-0.17	0.26	-1.24	1.18	-0.26	-0.49	0.3875	0.3275	-0.1825	0.533636	0.593659	0.789086	0.999971	1	0.96741
Bpnt1_1	A0A1B0GRV0	0.9	1.38	1.1	0.99	1.14	1.24	1.55	0.79	1.09	0.89	0.77	0.99	1.53	0.9	1.16	0.86	0.0875	-0.1575	0.02	0.701596	0.412268	0.929731	0.999971	1	0.994744
Bpnt2	Q80V26	0.35	1.78	1.54	0.34	2.11	1.67	1.48	1.24	1.98	1.08	1.64	1.75	2.11	2.12	1.71	0.64	0.6225	0.61	0.6425	0.150363	0.161594	0.205903	0.999971	1	0.817241
Bptf	A2A654	1.16	0.29	0.58	0.88	0.12	-0.16	0.84	0.32	0.29	0.5	0.31	-0.12	-1.29	-0.41	0	-0.14	-0.4475	-0.4825	-1.1875	0.152757	0.0839285	0.00685069	0.999971	1	0.582714
Braf	P28028-1	-0.84	0.46	0.76	0.28	0.03	0.56	0.6	0.25	0.32	-0.7	0.4	0.2	-0.05	-0.2	0.62	0.33	0.195	-0.11	0.01	0.595596	0.790076	0.979108	0.999971	1	0.99925
Braf_1	P28028	-0.29	-0.54	-0.71	-0.42	-0.62	-0.86	-1.44	-0.24	-1.14	-0.22	-1.36	-0.62	-0.29	-0.74	-0.61	-0.14	-0.3	-0.345	0.045	0.302796	0.245686	0.833555	0.999971	1	0.979036
Brap	Q99MP8	1.12	1.4	1.5	1.37	1.2	1.5	1.21	1.49	1.43	1.66	1.32	1.06	0.94	1.43	1.23	1.73	0.0025	0.02	-0.015	0.989323	0.920754	0.947084	0.999971	1	0.997651
Brat1	E9QLK3	-0.22	0.22	-0.45	0.24	0.5	-0.07	-0.07	-0.02	0.47	0.05	-0.07	0.15	0.12	-0.02	0.33	0.24	0.1375	0.2025	0.22	0.582698	0.403218	0.345439	0.999971	1	0.863502
Brawnin	Q8BTC1	-0.66	-1.44	-0.52	0.1	-1.18	-1.96	-0.74	-1.52	-1.56	-1.32	-1.26	-0.91	-2.11	-1.66	-1.71	-0.6	-0.72	-0.6325	-0.89	0.0935627	0.0906785	0.0635209	0.999971	1	0.725348
Brcc3	P46737	0.09	1.2	0.35	0.12	0.84	1.22	0.1	0.41	1.4	1.05	0.29	0.33	1.59	1.26	0.56	0.41	0.2025	0.3275	0.515	0.567372	0.384249	0.190206	0.999971	1	0.810547
Brd1	G5E8P1	-0.54	-1.39	-1.31	-3.25	-1.11	-1.5	-1.24	-2.71	-1.06	-1.1	-1.19	-1.76	-1.68	-2.33	-1.62	-3.18	-0.0175	0.345	-0.58	0.977476	0.53688	0.362367	0.999971	1	0.869526
Brd2	Q7JJ13	0.8	0.55	-0.12	-0.94	0.31	-0.07	-0.14	-0.01	0.36	-0.82	0.09	-0.35	-1.52	0.33	-0.17	-0.46	-0.05	-0.2525	-0.5275	0.897005	0.571275	0.317293	0.999971	1	0.853841
Brd3	Q8K2F0	0.9	-0.76	1.07	1.31	-0.38	-0.62	0.54	1.24	-0.15	-0.2	0.98	1.74	-1.63	-1.03	1.46	1.29	-0.435	-0.0375	-0.6075	0.462313	0.950926	0.469957	0.999971	1	0.892481
Brd4	Q3UH70	1.17	1.66	0.32	0.76	1.65	1.5	0.4	0.53	1.71	1.44	0.45	0.44	1.75	1.51	0.34	0.58	0.0425	0.0325	0.0675	0.917492	0.937789	0.873783	0.999971	1	0.984109
Brd7	O88665	-1.23	-0.71	-0.96	-1.06	-0.95	-1.38	-0.76	-0.58	-1.31	-1.27	-1.88	-2.27	-1.46	-0.89	-0.97	-1.86	0.0725	-0.6925	-0.305	0.760442	0.0327062	0.27819	0.999971	1	0.843812
Brd8	Q8R3B7-2	3.2	0.84	1.9	2.04	0.35	1.16	2.16	1.06	0.79	1.93	1.28	1.13	-1.62	0.38	0.78	1.02	-0.8125	-0.7125	-1.855	0.171183	0.180421	0.0248343	0.999971	1	0.67615
Brd9	A0A1Y7VJ63	1.77	0.03	0.32	-0.4	-0.38	-2.11	0.31	0.08	0.24	0.8	-0.56	0.25	-2.18	0.78	1.08	0.37	-0.955	-0.2475	-0.4175	0.169707	0.629225	0.601576	0.999971	1	0.924453
Bri3bp	Q8BXV2	-1.46	-0.05	0.18	0.1	0.09	0.22	-0.3	0.01	0.27	-2.56	-0.06	-2.07	-0.08	-0.1	0.18	0.02	0.3125	-0.7975	0.3125	0.428253	0.293854	0.419786	0.999971	1	0.87788
Brinp1	Q920P3	-0.18	-0.16	-0.15	-0.47	0	-0.22	0.13	-0.21	-0.03	-0.13	0.31	0.36	0.21	-0.41	-0.5	-0.18	0.165	0.3675	0.02	0.386494	0.0919067	0.927737	0.999971	1	0.994229
Brinp2	Q6DFY8	-1.07	-0.95	-1.27	-1.52	-0.94	-0.91	-0.96	-1.25	-0.47	-0.92	-1.1	-0.56	-0.56	-1.15	-1.55	-1.09	0.1875	0.44	0.115	0.36826	0.082364	0.662386	0.999971	1	0.936148
Brinp3	Q499E0	0.61	-1.38	-2.31	-3.21	-1.12	-1.24	-1.71	-2.7	-1.09	-0.48	-1.79	-1.87	-0.26	-1.17	-2.39	-2.71	-0.12	0.265	-0.06	0.881057	0.740166	0.946281	0.999971	1	0.997646
Brix1	Q9DCA5	-0.26	-2.17	-1.02	-1.46	-1.82	-2.57	-1.52	-1.47	-3.22	-1.99	-1.75	-1.39	-3.21	-2.41	-0.97	-1.27	-0.6175	-0.86	-0.7375	0.1894	0.127646	0.238393	0.999971	1	0.833594
Brk1	Q91VR8	-1.61	-0.99	-1.86	-1.75	0.34	-2.51	1.58	-2.47	1.3	-2.23	-1.39	-0.14	1	-2.51	-1.53	-1.74	0.7875	0.9375	0.3575	0.40925	0.215951	0.617538	0.999971	1	0.928581
Brms1l	Q3U1T3	0.16	0.09	0.94	-0.09	0.44	-0.21	-0.37	-0.27	-0.34	0.36	-0.8	0.92	-1.3	-0.13	-0.6	0.34	-0.3775	-0.24	-0.6975	0.230472	0.572214	0.108743	0.999971	1	0.78268
Brox	Q8K2Q7	2.23	1.28	1.25	0.82	1.16	1.04	1.39	0.68	1.18	1.95	0.85	0.77	1.12	1.01	0.81	0.23	-0.3275	-0.2075	-0.6025	0.336683	0.594788	0.114172	0.999971	1	0.78268
Brpf1	A0A0N4SUS4	-0.83	2.72	2.38	1.12	4.19	1.76	2.52	1.76	4.48	0.05	4.09	4.68	5.71	0.57	3.07	1.21	1.21	1.9775	1.2925	0.194165	0.132055	0.316365	0.999971	1	0.85361
Brsk1	Q5RJI5	-0.44	-0.7	-0.12	-0.26	-0.72	-0.63	-0.07	-0.09	-0.49	-0.45	0.02	-0.16	-0.31	-0.72	-0.09	0.09	0.0025	0.11	0.1225	0.99182	0.614424	0.620454	0.999971	1	0.929305
Brsk2	G3UWV4	1.46	-1.1	-0.98	-0.26	-1.4	-0.73	0.24	-0.4	-2.03	0.14	-0.42	-1.02	-1.69	-1	-0.72	-1.13	-0.3525	-0.6125	-0.915	0.573393	0.381897	0.136799	0.999971	1	0.784948
Brsk2_1	Q69Z98	0.4	-0.24	-0.1	0	-0.37	0.04	-0.18	-0.06	-0.14	0.01	-0.15	-0.19	-0.25	-0.27	-0.14	0.32	-0.1575	-0.1325	-0.1	0.4653	0.510531	0.668607	0.999971	1	0.938711
Brwd1	Q921C3	1.92	-0.27	-0.05	0	0.14	0.48	0.93	-2.44	-0.35	1.63	-0.55	-2.9	1.2	-0.03	-1.6	-4.7	-0.6225	-0.9425	-1.6825	0.45484	0.336545	0.192406	0.999971	1	0.810547
Bscl2	A0A0R4J225	-0.92	0.32	-0.37	-0.32	0.17	0.63	-0.34	0.17	0.91	-0.64	0.37	-0.07	1.78	0.47	-0.04	-0.01	0.48	0.465	0.8725	0.162745	0.262428	0.0878229	0.999971	1	0.765196
Bsdc1	Q80Y55	0.99	-0.06	-0.25	-0.48	-0.64	-0.12	-0.04	-0.47	-0.66	0.16	-0.61	-0.44	-0.23	-0.28	-0.5	-0.24	-0.3675	-0.4375	-0.3625	0.307689	0.251859	0.290229	0.999971	1	0.847402
Bsg	K3W4Q8	0.61	-0.29	-0.11	0.28	-0.69	0.03	0.87	-0.07	-0.75	0.43	-0.35	-0.57	-0.53	-0.48	-0.23	0.01	-0.0875	-0.4325	-0.43	0.812107	0.210455	0.126138	0.999971	1	0.783071
Bsn	O88737	-0.42	-1.38	-0.93	-1.01	-1.45	-0.95	-0.76	-1.27	-1.45	-0.88	-1.15	-1.3	-1.01	-1.29	-1.19	-0.94	-0.1725	-0.26	-0.1725	0.528436	0.323649	0.487294	0.999971	1	0.897906
Btaf1	E9QAE3	-0.14	1.3	0.94	1.03	1.2	0.89	0.65	1.15	1.08	-0.11	1.08	0.98	0.35	0.63	1	0.99	0.19	-0.025	-0.04	0.577783	0.951371	0.908584	0.999971	1	0.991707
Btbd1	P58544	3.95	0.18	-0.04	-1.03	-0.38	0.71	0.14	-0.43	-0.46	2.34	0.02	0.62	-1.37	-0.05	-0.31	-0.17	-0.755	-0.135	-1.24	0.459572	0.90433	0.2417	0.999971	1	0.835682
Btbd10	E9Q6L8	0.61	-0.69	-0.4	-0.3	-0.62	-0.39	-0.58	-0.57	-0.71	0.23	-0.08	0.06	-0.93	-0.24	-0.29	0.05	-0.345	0.07	-0.1575	0.26153	0.838492	0.649561	0.999971	1	0.933842
Btbd11	Q6GQW0	-0.46	-0.35	-0.98	-0.75	-0.64	-0.27	-1.13	-0.62	-0.84	-0.3	-1.01	-1.24	-0.72	-0.8	-1.1	-0.49	-0.03	-0.2125	-0.1425	0.905728	0.431823	0.539345	0.999971	1	0.910077
Btbd17	Q9DB72	-0.45	-0.26	-0.45	-0.57	-0.55	-0.25	-0.5	-0.71	-0.57	-0.29	-0.7	-0.86	-0.43	-0.37	-0.96	-0.39	-0.07	-0.1725	-0.105	0.708062	0.386166	0.61663	0.999971	1	0.928229
Btbd8	Q3TEG0	-0.29	0.2	-0.43	-1.18	0.29	0.19	0.07	-1.39	1.32	-0.55	0.41	0.87	1.26	-1.09	-1.33	-0.61	0.215	0.9375	-0.0175	0.640209	0.0690313	0.976586	0.999971	1	0.99925
Btbd9	Q8C726	1.44	-0.06	-0.46	1.32	-0.09	0.36	-0.21	0.69	0.31	1.16	-0.65	-0.21	-0.31	0.55	0.03	1.32	-0.3725	-0.4075	-0.1625	0.452134	0.481309	0.76808	0.999971	1	0.962535
Btd	A0A0R4J131	-1.23	-0.08	1.56	0.91	-0.14	-0.69	0.88	0.66	-0.24	-1.2	2.01	1.68	0.37	-0.32	1.25	1.11	-0.1125	0.2725	0.3125	0.861175	0.758482	0.630066	0.999971	1	0.932649
Btf3	Q64152	3.14	1.69	1.79	2.12	1.61	1.85	1.71	2.34	1.67	2.56	1.88	1.74	1.01	1.82	2.14	2.18	-0.3075	-0.2225	-0.3975	0.403007	0.559006	0.344374	0.999971	1	0.862346
Btf3l4	Q9CQH7	0.5	2.33	2.26	2.39	2.28	2	2.05	2.31	2.27	1.35	2.48	2.63	2.28	2.02	2.21	2.84	0.29	0.3125	0.4675	0.512728	0.538998	0.324085	0.999971	1	0.85548
Bub3	A0A140LHA2	3.38	3.17	3.08	3.27	2.89	3.45	3.62	2.46	3.26	3.34	2.79	2.31	1.9	2.67	2.36	1.93	-0.12	-0.3	-1.01	0.676627	0.277373	0.00190571	0.999971	1	0.476373
Bud13	Q8R149	1.89	0.48	-0.04	-0.54	-0.14	1.36	-0.12	0.64	-0.07	1.99	0.89	0.14	0.91	0.11	0.16	0.21	-0.0125	0.29	-0.1	0.982795	0.652701	0.846256	0.999971	1	0.979924
Bud31	Q6PGH1	1.72	0.74	0.37	0.08	0.01	0.38	0.9	-0.07	0.2	1.11	0.66	-0.01	-0.27	0.55	0.38	-0.32	-0.4225	-0.2375	-0.6425	0.308199	0.571201	0.137434	0.999971	1	0.784948
Bysl	O54825	-2.64	-0.19	-0.02	-1.44	-0.83	-0.92	-0.06	-1.11	-0.9	-3.39	0.1	0.12	-0.74	-1.92	-0.81	-2.42	0.3425	0.055	-0.4	0.569154	0.952561	0.55492	0.999971	1	0.91473
Bzw1	A0A087WQS2	0.97	1.54	1.94	1.83	1.28	1.39	1.6	1.58	1.61	1.45	1.72	0.58	0.8	1.15	2.1	1.82	-0.1075	-0.23	-0.1025	0.67556	0.499307	0.776886	0.999971	1	0.964475
Bzw2	Q91VK1	1.23	2.01	1.14	0.96	1.75	2.04	0.91	1.47	2.03	2.02	1.07	1.34	1.85	2.01	1.31	1.26	0.2075	0.28	0.2725	0.537464	0.411666	0.385041	0.999971	1	0.871816
C030006K11Rik	Q8VE95	-0.4	-0.88	-0.23	0.11	-1.32	-0.65	-0.96	0.02	-1.13	-0.78	-0.06	-1.25	-1.05	-1.03	-0.76	-0.73	-0.3775	-0.455	-0.5425	0.291864	0.198447	0.0554839	0.999971	1	0.725348
C1qa	P98086	2.43	2.39	1.6	1.89	2.36	2.32	1.2	1.38	1.95	1.98	1.45	2.07	2	2.52	1.83	1.77	-0.2625	-0.215	-0.0475	0.469768	0.425685	0.865245	0.999971	1	0.983318
C1qb	P14106	2.25	2.74	0.8	0.99	2.45	2.67	0.99	1.1	2.9	2.65	1.49	1.37	2.64	2.39	1.49	1.46	0.1075	0.4075	0.3	0.855636	0.479297	0.568601	0.999971	1	0.91816
C1qbp	Q8R5L1	-1.38	-0.57	-1.79	-1.64	-0.64	-0.86	-1.71	-1.76	-0.85	-1.04	-1.93	-2.06	-0.76	-0.45	-1.74	-2.03	0.1025	-0.125	0.1	0.788591	0.751591	0.820522	0.999971	1	0.975761
C1qc	Q02105	0.63	1.28	0.87	1.04	1.04	1.1	1.17	0.89	0.98	1.11	0.78	0.94	0.25	1.24	1	1.34	0.095	-0.0025	0.0025	0.643915	0.990205	0.993196	0.999971	1	0.99925
C1ql3	Q9ESN4	-0.84	-1.27	-0.8	-0.65	-0.98	-0.98	-0.56	-0.75	-0.91	-0.78	-0.83	-1.15	-1.04	-1.2	-0.62	-0.68	0.0725	-0.0275	0.005	0.736311	0.893635	0.982752	0.999971	1	0.99925
C1qtnf4	Q8R066	-0.78	-0.92	-0.71	-0.81	-0.45	-0.99	-0.57	-0.48	-0.57	-0.9	-0.59	-0.18	-0.23	-0.67	-0.52	-0.62	0.1825	0.245	0.295	0.361874	0.250138	0.134859	0.999971	1	0.784948
C2cd2	E9Q3C1	0.92	-0.06	-0.24	-0.28	-0.03	0.12	0.11	-0.51	0.06	1.17	-0.21	-0.39	0.08	-0.48	-0.42	-0.68	-0.1625	0.0725	-0.46	0.614998	0.865147	0.183065	0.999971	1	0.809025
C2cd2l	Q80X80	-0.19	-1.04	-0.78	-0.89	-0.85	-1.04	-0.76	-0.81	-0.88	-0.4	-0.72	-0.69	-0.42	-0.69	-0.72	-0.76	-0.14	0.0525	0.0775	0.551285	0.827651	0.744114	0.999971	1	0.961064
C2cd4c	Q5HZI2	0.62	-0.25	-0.19	-0.08	-0.56	0.5	-0.23	-0.19	-0.23	0.45	-0.25	-0.55	-0.07	0.1	-0.09	0.14	-0.145	-0.17	-0.005	0.638212	0.574083	0.983522	0.999971	1	0.99925
C2cd5	Q7TPS5	2.27	-1.72	-0.95	-0.94	-2.55	-2.04	-1.53	-0.79	2.46	3.22	-2.34	-1.2	-0.84	-1.83	-2.96	-1.86	-1.3925	0.87	-1.5375	0.133503	0.552962	0.110029	0.999971	1	0.78268
C2cd5_1	A0A0N4SW93	-1.14	-0.84	-0.63	-1.13	-0.86	-0.7	-0.81	-0.75	-0.7	-0.86	-0.74	-0.78	-0.37	-0.81	-0.73	-0.61	0.155	0.165	0.305	0.430096	0.395247	0.168987	0.999971	1	0.80174
C3	P01027	2.19	2.96	1	1.95	4.41	1.9	2.96	1.14	2.23	0.88	1.91	2.72	2.82	1.15	1.49	1.34	0.5775	-0.09	-0.325	0.440565	0.862743	0.531594	0.999971	1	0.910069
C4b	P01029	0.88	-1.23	-2.53	-0.33	1.6	1.15	0.24	0.99	1.52	1.26	0.48	1.36	1.56	1.17	-0.3	0.63	1.7975	1.9575	1.5675	0.0284267	0.0186422	0.0608535	0.999971	1	0.725348
C9orf72	Q6DFW0	-0.42	-1.56	0.67	0.8	-1.37	-1.52	0.07	0.89	-1.61	-1.46	0.83	0.67	-1.5	-1.8	0.75	0.86	-0.355	-0.265	-0.295	0.625297	0.734472	0.716354	0.999971	1	0.952576
Ca1	P13634	-0.35	-0.36	-1.34	1.03	1.58	-1.83	0.67	-0.6	-1.75	-2.52	-1.13	-1.45	-0.54	-1.76	-1.21	-0.64	0.21	-1.4575	-0.7825	0.792931	0.0214325	0.1588	0.999971	1	0.798217
Ca10	P61215	-0.34	-1.28	-2.31	-1.97	-1.17	-1.91	-2	-2.13	-1.04	-0.99	-2.47	-2.52	-1.84	-2.02	-2.45	-2.43	-0.3275	-0.28	-0.71	0.478226	0.620983	0.129913	0.999971	1	0.784948
Ca11	O70354	2.11	0.59	-0.66	0.05	1.29	0.65	-0.28	-0.11	1.12	1.71	-0.1	0.31	1.45	0.22	-0.01	0.6	-0.135	0.2375	0.0425	0.829863	0.716666	0.944521	0.999971	1	0.997225
Ca14	Q9WVT6	-1.2	-0.99	-0.68	-0.78	-0.94	-1.51	-1.43	-1.86	-1	-1.23	-1.65	-1.42	-1.98	-1.08	-0.67	-1.54	-0.5225	-0.4125	-0.405	0.0619531	0.0887372	0.215777	0.999971	1	0.826893
Ca2	P00920	-0.92	-0.54	-0.84	-0.94	-0.03	-0.93	0.02	-1.35	-0.57	-1.57	-0.85	-0.76	-0.49	-0.8	-1.02	-1.29	0.2375	-0.1275	-0.09	0.498356	0.625364	0.698415	0.999971	1	0.947781
Ca4	Q64444	-0.8	-0.37	-0.65	-0.78	-0.67	-0.64	-1.36	-1.34	-0.52	-0.7	-0.77	-0.65	-0.29	-0.54	-1.08	-0.77	-0.3525	-0.01	-0.02	0.184502	0.956129	0.931475	0.999971	1	0.995069
Ca5b	Q9QZA0	-0.2	-0.44	-0.57	-1.03	-0.37	-0.95	-1.03	-0.39	-0.69	-0.71	0.11	-1.06	0.16	-0.51	-0.63	-0.52	-0.125	-0.0275	0.185	0.643303	0.928802	0.500347	0.999971	1	0.904223
Ca7	Q9ERQ8	0	-0.44	-0.18	-0.37	-0.82	-0.57	-1.05	-0.45	-1.38	-1.21	-0.91	-1.43	-0.64	-0.91	-1.31	-0.52	-0.475	-0.985	-0.5975	0.0502666	0.00100763	0.030537	0.999971	0.540208	0.678474
Ca8	P28651	-0.01	0.59	0.55	0.5	-0.15	0.56	0.11	0.55	0.03	0.06	0.53	0.55	1.15	0.84	0.88	1.22	-0.14	-0.115	0.615	0.580554	0.624978	0.0183985	0.999971	1	0.635388
Caap1	Q8VDY9	-0.25	0.49	-7.72	-5.12	0.64	0.83	-6.58	-3	0.06	-1.05	-4.19	-7.38	0.85	1.62	-3.69	-4.67	1.1225	0.01	1.6775	0.631854	0.99653	0.460348	0.999971	1	0.889706
Cab39	Q06138	-0.1	0.06	-0.47	-0.68	0.1	0.33	-0.22	-0.94	0.37	0.04	-0.54	-0.34	-0.11	-0.22	-0.69	-0.94	0.115	0.18	-0.1925	0.724106	0.522819	0.492183	0.999971	1	0.899886
Cab39l	Q9DB16	0.16	1.13	1.22	0.98	0.92	1.06	0.78	0.69	0.51	0.03	-1.14	0.72	0.52	1.09	0.92	1.11	-0.01	-0.8425	0.0375	0.970822	0.0909918	0.897378	0.999971	1	0.98896
Cabin1	G3X8Q1	1.46	-0.03	0.85	0.64	0.08	-0.13	0.97	0.22	-0.18	1.11	0.35	0.13	0.42	-0.47	0.42	-0.01	-0.445	-0.3775	-0.64	0.256419	0.353568	0.106736	0.999971	1	0.78268
Cables1	Q3U148	-1.22	-0.94	-1.25	-1.1	-1.12	-1.02	-1.45	-0.89	-0.8	-1.41	-1.84	-1.3	-1.07	-1.14	-0.94	-1.07	0.0075	-0.21	0.0725	0.969823	0.411658	0.676717	0.999971	1	0.942048
Cables2	Q8K3M5	-3.1	-3.07	-1.1	-0.85	-2.44	-2.55	-0.78	0.14	-2.53	-3.55	-1.18	-0.84	-2.23	-2.47	-0.48	-1.34	0.6225	0.005	0.4	0.447371	0.994957	0.565797	0.999971	1	0.917959
Cabp1	D3Z1M4	1.69	0.29	1.04	1.47	0.23	0.3	2.92	0.69	-0.73	0.62	1.51	1.42	0.38	0.13	0.92	1.86	-0.0875	-0.4175	-0.3	0.891589	0.460966	0.520591	0.999971	1	0.906972
Cacfd1	A6PWX1	0.08	-1.53	-1.54	-0.36	-0.1	0.58	-0.77	0	0.03	0.51	-1.83	-0.61	0.34	-0.31	-0.19	0.1	0.765	0.3625	0.8225	0.126546	0.549861	0.0751191	0.999971	1	0.746958
Cachd1	Z4YK18	0.06	-0.04	-0.25	-0.2	0.21	0.5	-0.68	0	-0.08	0.37	-0.63	-0.07	0.55	0.42	0.17	0.48	0.115	0.005	0.5125	0.679849	0.983694	0.0202205	0.999971	1	0.635388
Cacna1a	A0A571BET0	-0.34	-0.54	-0.18	-0.31	-0.72	-0.21	-0.42	-0.33	-0.69	-0.2	-0.26	-0.4	-0.33	-0.73	-0.4	-0.35	-0.0775	-0.045	-0.11	0.691852	0.814911	0.56491	0.999971	1	0.917442
Cacna1a_1	A0A571BE75	-0.44	-0.78	-1.64	-1.56	-0.54	0.76	-2.04	-1.86	0.19	0.18	-2.48	-2.14	-0.04	0.13	-1.66	-1.46	0.185	0.0425	0.3475	0.776085	0.952254	0.502437	0.999971	1	0.904573
Cacna1b	O55017-2	-0.49	-0.83	-0.78	-1.02	-0.89	-0.86	-0.38	-1.17	-0.74	-0.75	-0.62	-0.68	-0.15	-1.18	-1.05	-1.16	-0.045	0.0825	-0.105	0.847141	0.65325	0.71304	0.999971	1	0.951793
Cacna1c	A0A087WR02	-1.15	-1.9	-1.24	-1.46	-1.6	-1.96	-1.39	-1.19	-1.89	-1.51	-1.38	-1.53	-1.37	-1.93	-1.42	-1.23	-0.0975	-0.14	-0.05	0.707245	0.55264	0.843865	0.999971	1	0.979814
Cacna1d	A0A589Q4M7	0.28	-1.19	-1.07	-0.29	-0.96	-0.01	-1.06	-0.58	-0.75	-0.46	-1.2	-0.74	-0.7	-0.91	-1	-0.6	-0.085	-0.22	-0.235	0.832165	0.554229	0.510005	0.999971	1	0.905815
Cacna1e	A0A087WS83	-0.9	-0.77	-0.73	-0.94	-0.9	-0.94	-0.78	-0.78	-0.81	-0.88	-0.9	-0.8	-0.3	-1.08	-1.02	-0.97	-0.015	-0.0125	-0.0075	0.928283	0.937852	0.973829	0.999971	1	0.99925
Cacna1e_1	A0A571BF18	-2.32	-0.65	1.28	0.16	-0.64	-0.35	0.78	-0.48	-0.4	-1.72	0.56	0.38	-1.36	-1.67	0.32	-0.03	0.21	0.0875	-0.3025	0.777483	0.915947	0.710024	0.999971	1	0.950695
Cacna1g	Q5SUG2	2.22	-1.76	-1.49	-1.74	-2	-0.05	-0.94	-1.45	-1.88	0.43	-1.92	-2.34	-2.13	-0.99	-2.05	-1.81	-0.4175	-0.735	-1.0525	0.66014	0.486209	0.262456	0.999971	1	0.842262
Cacna1h	E9Q6P9	-0.66	-1.25	-0.44	-0.32	-1.11	-0.97	-0.04	0.1	-0.68	-0.39	-0.83	-0.58	-0.37	-0.87	0.05	-0.49	0.1625	0.0475	0.2475	0.656904	0.850147	0.406882	0.999971	1	0.874911
Cacna1i	E9Q7P2	0.62	-0.43	0.14	0.15	-0.92	-0.24	-0.07	-0.02	-0.62	0.32	-0.08	-0.31	-0.5	-0.73	-0.5	-0.17	-0.4325	-0.2925	-0.595	0.181108	0.342868	0.0486564	0.999971	1	0.710102
Cacna2d1	O08532-5	-0.95	-1.44	-1.16	-1.05	-1.18	-1.09	-1.22	-1.04	-1.14	-1.23	-1.14	-1.05	-0.9	-1.28	-1.18	-1.18	0.0175	0.01	0.015	0.924836	0.956094	0.939079	0.999971	1	0.995869
Cacna2d2	E9Q683	-1.42	-1.58	-1.08	-1.2	-0.94	-1.57	-1.29	-1.03	-0.67	-1.91	-1.45	-0.86	-0.86	-1.44	-0.76	-1.47	0.1125	0.0975	0.1875	0.615982	0.752959	0.457111	0.999971	1	0.88754
Cacna2d3	Q9Z1L5	-0.44	-0.62	-0.83	-0.89	-0.47	-0.62	-0.85	-0.38	-0.36	-0.43	-0.77	-0.94	0.13	-0.4	-0.76	-0.7	0.115	0.07	0.2625	0.572664	0.745728	0.317618	0.999971	1	0.853893
Cacnb1	Q8R3Z5-3	0.58	-1.33	-1.81	-0.27	-1.22	-1.01	-1.26	-0.98	-2.51	-0.03	-0.86	-2.07	-2.86	-0.81	-2.42	-1.32	-0.41	-0.66	-1.145	0.422646	0.364505	0.106322	0.999971	1	0.78268
Cacnb1_1	A2A543	-1.23	-1.85	-1.46	-1.59	-1.62	-1.71	-1.95	-1.76	-1.57	-1.02	-1.44	-1.34	-1.37	-1.66	-1.49	-1.19	-0.2275	0.19	0.105	0.279615	0.391966	0.623968	0.999971	1	0.930479
Cacnb2	Q8CC27	-1.68	-1.23	-1.69	-1.41	-1.25	-1.4	-1.64	-1.38	-1.31	-2.06	-1.84	-2.33	-1.32	-1.48	-1.64	-2	0.085	-0.3825	-0.1075	0.669262	0.171765	0.635236	0.999971	1	0.93301
Cacnb3	P54285	-0.9	-1.02	-0.79	-0.9	-0.99	-0.86	-0.72	-0.94	-0.98	-0.95	-0.68	-0.8	-0.79	-1.11	-0.9	-0.85	0.025	0.05	-0.01	0.883092	0.768615	0.954095	0.999971	1	0.998056
Cacnb4	Q8R0S4	-0.01	-0.94	-1.01	-1.04	-1.37	-1.1	-0.51	-1.25	-1.28	-0.72	-1.11	-1.33	-1.09	-1.18	-1.47	-1.22	-0.3075	-0.36	-0.49	0.343675	0.240122	0.105041	0.999971	1	0.78268
Cacng2	O88602	-1.3	-1.35	-1.74	-2.2	-1.33	-1.45	-1.52	-1.51	-1.59	-1.39	-1.35	-1.95	-0.66	-1.62	-2.14	-1.93	0.195	0.0775	0.06	0.432855	0.772992	0.873256	0.999971	1	0.984109
Cacng3	Q9JJV5	-1.1	0.34	0.61	-1.07	0.26	0.45	2.01	-0.98	0.62	-0.87	0.83	0.91	1.07	-0.79	-0.38	-0.85	0.74	0.6775	0.0675	0.299724	0.253455	0.907946	0.999971	1	0.991496
Cacng4	Q9JJV4	-1.81	-1.35	-1.02	-0.94	-2.13	-2.53	-1.01	-0.44	-2.18	-1.56	-1.22	-0.61	-2.13	-2.47	-0.81	-0.75	-0.2475	-0.1125	-0.26	0.613536	0.76275	0.572687	0.999971	1	0.91816
Cacng7	P62956	-1.89	-1.09	-1.2	-1.56	-0.56	0.21	-0.86	-1.54	-0.37	-0.09	-2.13	-0.72	0.28	0.8	-0.97	-1.74	0.7475	0.6075	1.0275	0.0820217	0.208599	0.0929915	0.999971	1	0.776565
Cacng8	S4R2F1	-0.65	-1.02	-1.28	-1.34	-1.15	-0.84	-0.99	-1.33	-1.16	-0.82	-1.45	-1.69	-1.02	-1.11	-1.09	-1.6	-0.005	-0.2075	-0.1325	0.982499	0.441207	0.583686	0.999971	1	0.920364
Cactin	Q9CS00	-0.67	-0.14	0.19	-0.82	-0.34	-0.68	-1.51	0.03	-0.42	-0.94	-0.57	-0.29	-0.35	0.19	-0.72	0.33	-0.265	-0.195	0.2225	0.500288	0.500404	0.51342	0.999971	1	0.905815
Cacul1	E9PV69	0.27	0.49	2.25	2.59	0.35	0.62	1.88	0.26	0.27	0.4	1.01	1.48	0.46	-0.29	-0.72	1.07	-0.6225	-0.61	-1.27	0.34331	0.326923	0.0777013	0.999971	1	0.752571
Cacybp	Q9CXW3	-1.06	-0.3	1.51	1.16	0.48	-0.09	1.48	1.04	0.39	-1.08	1.2	1.09	-0.02	-0.3	1.33	1.03	0.4	0.0725	0.1825	0.531631	0.920661	0.781755	0.999971	1	0.965859
Cad	E9QAI5	-0.43	-0.37	-0.1	-0.01	-0.16	-0.46	-0.1	0.38	-0.15	-0.32	0.13	0.13	0.15	-0.03	0.3	0.24	0.1425	0.175	0.3925	0.550522	0.397853	0.0666777	0.999971	1	0.733937
Cadm1	E0CY16	-1.38	-0.87	-1.56	-0.74	-0.8	-1.93	-1.3	-1.44	-1.33	-1.21	-0.79	-1.35	-1.75	-1.13	-1.81	-1.65	-0.23	-0.0325	-0.4475	0.465307	0.899945	0.125466	0.999971	1	0.78268
Cadm1_1	Q8R5M8-4	-0.71	-1.42	0.56	0.41	-1.3	-1.14	0.08	0.43	-1.3	-1.23	0.08	0.41	-1.09	-1.17	0.48	0.5	-0.1925	-0.22	-0.03	0.742674	0.711681	0.960521	0.999971	1	0.998721
Cadm2	G3UZM4	-0.62	-1.02	-1.21	-1.25	-1.37	-0.53	-1.46	-1.66	-1.24	-0.67	-1.76	-1.82	-1.15	-0.82	-1.6	-1.41	-0.23	-0.3475	-0.22	0.446865	0.278729	0.390819	0.999971	1	0.871816
Cadm3	K4DI58	-0.27	-2.08	-1.18	-0.87	-1.66	-0.75	-0.76	-1.35	-1.23	-0.38	-1.78	-2.01	-1.72	-0.91	-1.18	-1.58	-0.03	-0.25	-0.2475	0.942628	0.611542	0.542911	0.999971	1	0.911251
Cadm4	Q8R464	-0.73	-0.92	-0.92	-0.67	-0.75	-0.94	-0.7	-0.5	-0.72	-0.85	-1.09	-0.88	-0.1	-0.93	-0.84	-0.58	0.0875	-0.075	0.1975	0.637451	0.672201	0.408532	0.999971	1	0.875014
Cadps	Q80TJ1	-0.57	-0.44	-0.35	-0.52	-0.52	-0.62	-0.32	-0.77	-0.62	-0.43	-0.7	-0.96	-0.33	-0.59	-0.76	-0.87	-0.0875	-0.2075	-0.1675	0.633127	0.281503	0.395872	0.999971	1	0.871816
Cadps_1	Q80TJ1-4	-1.27	-0.54	-1.61	-1.13	-0.93	-0.79	-1.56	-1.58	-0.98	-1.66	-2.28	-1.97	-1.49	-0.42	-1.54	-1.33	-0.0775	-0.585	-0.0575	0.802573	0.122601	0.866215	0.999971	1	0.983462
Cadps_2	Q80TJ1-2	0	-0.96	-0.29	-0.13	-1.23	-1.34	-1.02	-0.39	-1.24	-0.52	-0.63	-0.01	-1.32	-0.94	-0.07	-0.3	-0.65	-0.255	-0.3125	0.0594367	0.447473	0.385973	0.999971	1	0.871816
Cadps_3	A0A286YE00	-2.86	-1.06	-1.9	-2.19	-1.96	-2.05	-2.31	-1.44	-1.67	-1.68	-1.7	-2.41	-4.84	-0.05	-1.82	-2.04	0.0625	0.1375	-0.185	0.874955	0.730572	0.845124	0.999971	1	0.979814
Cadps2	E9Q835	-0.39	-0.71	-0.67	-1.08	-0.83	-0.56	-0.54	-1.28	-0.68	-0.61	-0.82	-1.05	-0.73	-0.76	-1.12	-1.47	-0.09	-0.0775	-0.3075	0.720425	0.719497	0.243035	0.999971	1	0.837316
Cadps2_1	Q8BYR5-4	1.7	1.02	-0.99	-0.35	1.2	0.56	-0.2	0.26	0.18	0.11	-0.17	0.19	2.16	-0.18	-0.85	1	0.11	-0.2675	0.1875	0.859424	0.642527	0.818069	0.999971	1	0.975007
Calb1	P12658	0.62	1.02	0.65	0.5	1.13	1.15	1.01	0.77	1.31	0.68	1.17	1.57	1.42	1.14	0.86	1.01	0.3175	0.485	0.41	0.139298	0.075162	0.0812176	0.999971	1	0.755254
Calb2	Q08331	-0.06	-0.64	0.23	0.24	0.34	-0.14	0.85	0.54	1.42	0.65	0.29	1.1	0.91	0.06	0.92	-0.13	0.455	0.9225	0.4975	0.156014	0.0182983	0.17093	0.999971	1	0.803758
Calcoco1	Q8CGU1	0.81	-0.19	-0.72	-0.52	-0.49	-0.45	-0.65	-0.82	-0.31	0.15	-0.84	-0.92	-0.44	-0.55	-1.17	-0.98	-0.4475	-0.325	-0.63	0.216614	0.429808	0.116772	0.999971	1	0.78268
Cald1	Q8VCQ8	0.96	1.97	0.93	2.5	4.63	2.43	2.43	0.66	2.35	2.62	2.97	3.83	0.84	2.1	1.78	1.4	0.9475	1.3525	-0.06	0.260223	0.0180455	0.892848	0.999971	1	0.98828
Cald1_1	E9QA15	1.58	0.97	0.65	2.04	4.78	2.86	1.76	-0.07	2.07	3.93	3.61	5.27	-0.63	1.41	0.75	0.56	1.0225	2.41	-0.7875	0.297356	0.00549514	0.134965	0.999971	1	0.784948
Calhm2	D3Z2E8	0.68	2.03	-0.35	-0.23	0.07	0.17	-1.1	-0.59	0.87	-0.03	-1.07	-1.15	1.11	0.86	-1.85	-0.71	-0.895	-0.8775	-0.68	0.144254	0.209784	0.404337	0.999971	1	0.87384
Calhm5	Q8R100	-0.8	0.15	0.28	0.58	0.27	-0.31	-0.95	0.28	-1.53	0.2	-0.69	-0.72	-1.64	0.19	-1	1.25	-0.23	-0.7375	-0.3525	0.567971	0.119543	0.586762	0.999971	1	0.920758
Calm3	P0DP28	-3.36	-3.53	-3.47	-4.12	-3.58	-3.36	-3.14	-3.73	-3.73	-4.16	-2.85	-4	-4.11	-3.92	-4.24	-4.25	0.1675	-0.065	-0.51	0.498733	0.846528	0.0483992	0.999971	1	0.710102
Calr	P14211	0.57	1.49	2.22	0.83	2.05	1.66	3.61	1.26	2.77	0.37	2.82	3.79	3.91	0.81	1.98	1.04	0.8675	1.16	0.6575	0.159619	0.144239	0.372788	0.999971	1	0.869526
Calu	Q6XLQ8	-0.88	0.7	0.08	0.07	0.78	0.47	0.14	0.54	1.08	-0.29	0.55	0.88	1.58	0.7	0.37	0.67	0.49	0.5625	0.8375	0.181469	0.206278	0.0619482	0.999971	1	0.725348
Calu_1	O35887	-1.65	1.02	-0.44	0.25	2.51	0.45	0.18	0.79	3.17	-1.12	0.46	0.97	4.84	-0.19	0.55	0.66	1.1875	1.075	1.67	0.116044	0.274576	0.166549	0.999971	1	0.800215
Caly	Q9DCA7	3.44	-0.68	0.35	0.81	-0.27	-0.13	2.29	0.1	1.25	2.63	-0.42	-0.1	-0.33	-0.89	-0.31	-1.22	-0.4825	-0.14	-1.6675	0.614212	0.889443	0.0666186	0.999971	1	0.733937
Camk1	Q91YS8	-0.45	-0.24	-0.67	-0.72	-0.28	-0.46	-0.46	-0.33	-0.42	-0.13	0.02	-0.13	-0.27	-0.03	0.14	-0.25	0.1375	0.355	0.4175	0.472515	0.10116	0.0662333	0.999971	1	0.733937
Camk1d	Q8BW96	-0.39	-0.42	0.18	0.07	-0.09	-0.18	-0.05	0.16	-0.15	-0.85	-0.27	-0.2	0.29	-0.39	0.1	0.07	0.1	-0.2275	0.1575	0.64637	0.374939	0.522874	0.999971	1	0.907797
Camk1d_1	Q8BW96-2	-3.29	-1.07	-1.07	-1.25	-0.58	0.02	-1.11	-1.05	-1.86	-2.77	-2	-1.6	-1.57	0.49	-1.06	-1.41	0.99	-0.3875	0.7825	0.100528	0.488782	0.250294	0.999971	1	0.839012
Camk1g	F6YRI7	-1.24	-0.87	-0.94	-0.23	-0.45	-0.97	-1.24	-0.35	-0.97	-1.04	-0.99	-0.6	-1.02	-0.92	-0.83	-0.12	0.0675	-0.08	0.0975	0.82568	0.756765	0.748271	0.999971	1	0.961064
Camk2a	P11798	-1.73	-1.36	-2.6	-2.74	-1.05	-0.25	-1.99	-1.68	-0.91	-1.88	-1.97	-3.53	-1.16	-1.69	-2.85	-2.47	0.865	0.035	0.065	0.0960661	0.9523	0.890798	0.999971	1	0.988184
Camk2a_1	F8WIS9	0.33	-0.06	0.23	0.11	-0.34	0.07	0.09	0.21	-0.71	-0.08	0.11	-0.75	-0.2	-0.33	0.02	0.02	-0.145	-0.51	-0.275	0.480604	0.0739741	0.171909	0.999971	1	0.804075
Camk2b	P28652	-0.32	-0.75	-0.61	-0.67	-0.86	-0.7	-0.54	-0.65	-0.85	-0.68	-0.57	-0.84	-0.27	-0.57	-0.44	-0.22	-0.1	-0.1475	0.2125	0.594372	0.430256	0.283461	0.999971	1	0.844538
Camk2b_1	Q5SVI1	0.55	-0.29	-1.78	-0.88	-0.99	-1.12	-1.79	-1.08	-0.73	-0.43	-2.73	-1.57	0.22	0.61	-1.36	-0.99	-0.645	-0.765	0.22	0.20796	0.258514	0.723858	0.999971	1	0.955292
Camk2d	E9Q1T1	-0.98	-1.11	-0.45	-0.21	-0.47	-0.59	-0.46	0.23	-0.44	-0.81	-0.27	-0.61	-0.09	-0.4	-0.15	-0.05	0.365	0.155	0.515	0.23514	0.560072	0.069177	0.999971	1	0.733937
Camk2d_1	F6RWZ9	-0.05	-1.65	-0.98	-1.3	-0.78	-0.86	-1.41	-0.49	-0.91	0.02	-1.19	-2.17	-0.83	0.34	-0.35	-0.86	0.11	-0.0675	0.57	0.772433	0.897754	0.199214	0.999971	1	0.813335
Camk2d_2	A0A0G2JGS4	-0.25	-3.73	-1.72	-1.25	-3.17	-1.77	-0.98	-1.37	-2.2	-5.26	-3.95	-3.62	-3.92	-0.99	-2.2	-1.92	-0.085	-2.02	-0.52	0.91373	0.0430772	0.547785	0.999971	1	0.911722
Camk2g	A0A286YCB8	-1.42	-3	-3.24	-2.78	-4.27	-1.68	-3.3	-3.18	-3.19	0.15	-3.76	-3.63	-3.5	-1.27	-2.64	-1.72	-0.4975	0.0025	0.3275	0.425633	0.997812	0.580693	0.999971	1	0.920178
Camk2g_1	A0A286YCW8	-1.12	-1.03	-1.47	-3.56	-0.92	-1.08	-1.77	-1.79	-1.88	-1.66	-1.28	-1.24	-1.37	-1.26	-2.47	-2.96	0.405	0.28	-0.22	0.493427	0.624002	0.739767	0.999971	1	0.960899
Camk2g_2	Q923T9-2	4.16	-1.13	0.28	0.37	-1.9	-1.01	2.48	-1.74	-1.88	1.2	-2.42	-2.55	-3.2	-2.57	-1.45	-3.03	-1.4625	-2.3325	-3.4825	0.297237	0.0975418	0.00963548	0.999971	1	0.613095
Camk2g_3	A0A2I3BQP6	-0.17	-0.16	-0.65	-1.1	-0.43	0.04	-0.85	-0.99	-0.64	-0.42	-1	-1.05	-0.15	-0.32	-0.78	-0.59	-0.0375	-0.2575	0.06	0.907779	0.374958	0.830815	0.999971	1	0.978535
Camk2g_4	Q923T9-3	1.17	1.38	-1.28	-1.8	1.53	2.5	-1.76	-1.33	1.3	2.2	-1.59	-1.75	1.95	2.39	-2.48	-1.2	0.3675	0.1725	0.2975	0.756896	0.882033	0.817137	0.999971	1	0.974929
Camk2n1	Q6QWF9	-0.17	-0.25	-0.99	-0.59	-0.46	-1.41	-0.79	-0.63	-0.4	-1.82	-0.05	-0.27	0.72	0.01	-0.87	-0.51	-0.3225	-0.135	0.3375	0.2843	0.749225	0.385381	0.999971	1	0.871816
Camk4	Q8BGR3	-0.49	0.88	1.14	0.75	0.84	0.14	0.85	0.9	0.97	-0.79	1.18	1.18	0.8	0.2	0.84	0.46	0.1125	0.065	0.005	0.772917	0.906489	0.989492	0.999971	1	0.99925
Camkk1	Q8VBY2	-0.24	0.29	0.04	-0.31	0.33	-0.17	-0.16	-0.53	0.38	-0.58	-0.09	-0.37	-0.16	-0.56	-0.5	-0.43	-0.0775	-0.11	-0.3575	0.758175	0.682428	0.120488	0.999971	1	0.78268
Camkk2	Q8C078	0.01	0.12	-0.21	-0.18	0.15	0.25	0.06	-0.32	0.57	-0.09	-0.23	0.07	0.5	0.21	-0.4	-0.28	0.1	0.145	0.0725	0.624689	0.529048	0.774383	0.999971	1	0.963884
Camkmt	Q3U2J5	0.19	-0.18	0.15	0.37	0.3	0.69	-0.51	0.37	0.39	0.9	-0.03	0.3	-0.22	0.01	-0.09	0.53	0.08	0.2575	-0.075	0.783867	0.317876	0.751325	0.999971	1	0.961064
Camkv	Q3UHL1	-2.1	-2.18	-0.74	-1	-1.54	-2.43	-0.62	-0.75	-1.53	-2.4	-0.87	-0.75	-1.87	-2.26	-0.91	-0.98	0.17	0.1175	1.57009e-16	0.742449	0.812268	1	0.999971	1	1
Camlg	P49070	-0.68	-0.2	-1.12	-0.37	-0.13	-0.02	0.85	-0.46	0.02	-0.42	0.35	-1	-0.2	-0.6	-0.76	-0.69	0.6525	0.33	0.03	0.0826734	0.357625	0.908584	0.999971	1	0.991707
Camsap1	A0A0A0MQE5	0.28	-0.03	-0.28	-0.45	0.02	-0.05	-0.3	-0.3	0.1	0.27	-0.12	-0.44	0.53	-0.02	-0.2	-0.07	-0.0375	0.0725	0.18	0.865895	0.769986	0.484141	0.999971	1	0.896352
Camsap2	A0A0A6YY67	0.72	0.6	0.7	0.49	0.3	0.43	0.4	0.54	0.5	0.48	0.73	0.66	0.44	0.43	0.57	0.53	-0.21	-0.035	-0.135	0.234674	0.835407	0.427435	0.999971	1	0.880793
Camsap3	Q80VC9-14	-0.64	-1.02	-1.28	-1.56	-1.28	-1.12	-1.17	-1.31	-0.88	-0.65	-1.1	-1.05	-0.61	-0.84	-1.28	-1.33	-0.095	0.205	0.11	0.688154	0.416749	0.694287	0.999971	1	0.947174
Camsap3_1	Q80VC9-5	-1.64	-0.53	1.49	-0.54	-2.14	-0.19	0.13	1.5	-0.42	-2.25	1.51	3.09	2.01	-0.49	1.64	1.1	0.13	0.7875	1.37	0.883836	0.514326	0.102726	0.999971	1	0.78268
Camta1	A2A891-5	1.3	1.65	1.91	1.88	1.51	1.95	1.44	2.16	1.08	0.96	1.77	1.4	1.13	1.86	1.64	1.98	0.08	-0.3825	-0.0325	0.750387	0.157634	0.900263	0.999971	1	0.990583
Camta2	B0QZH6	1.01	1.09	0.68	1.13	0.89	0.91	0.3	0.92	0.37	0.65	0.36	0.19	0.68	1.26	0.34	0.65	-0.2225	-0.585	-0.245	0.335156	0.0147743	0.336077	0.999971	1	0.858827
Cand1	Q6ZQ38	-0.71	-0.44	0.3	0.05	-0.3	-0.16	0.1	0.18	-0.41	-0.46	-0.03	-0.34	-0.57	0.02	0.37	0.29	0.155	-0.11	0.2275	0.573759	0.682131	0.479217	0.999971	1	0.894438
Cand2	Q6ZQ73	-0.77	0.08	0.1	0.16	0.46	-0.13	-0.45	0.34	0.48	0.11	0.02	0.27	0.68	0.6	-0.18	0.32	0.1625	0.3275	0.4625	0.60387	0.234893	0.15273	0.999971	1	0.795578
Cant1	Q8VCF1-3	0.31	0.75	1.18	1.02	0.65	0.92	0.14	0.79	0.24	0.79	1.68	0.24	0.43	1.33	1.17	1.53	-0.19	-0.0775	0.3	0.493428	0.837327	0.349016	0.999971	1	0.865162
Canx	P35564	-0.69	-1.5	-0.04	-0.06	-1.13	-0.86	0.45	0.01	-0.87	-0.89	-0.09	0.11	-0.71	-0.54	0.56	0.3	0.19	0.1375	0.475	0.687762	0.739054	0.294801	0.999971	1	0.847402
Cap1	P40124	-0.34	-0.17	0.15	-0.08	0.01	-0.17	0.53	-0.18	0.3	-0.37	0.2	0.3	0.22	-0.47	-0.07	0	0.1575	0.2175	0.03	0.503334	0.351374	0.891939	0.999971	1	0.988225
Cap2	Q9CYT6	-0.3	0.52	0.46	0.28	0.47	0.23	0.42	-0.03	0.5	-0.12	0.47	0.44	0.6	-0.13	0	0.33	0.0325	0.0825	-0.04	0.895569	0.751655	0.88205	0.999971	1	0.986381
Capg	Q99LB4	-0.71	1.11	0.83	0.62	2.15	1.22	0.33	0.62	1.04	-1.17	1.01	1.25	0.14	1.04	1.22	0.76	0.6175	0.07	0.3275	0.258809	0.912664	0.465136	0.999971	1	0.89116
Capn1	O35350	-0.02	0.12	-0.07	0.04	-0.05	-0.03	-0.12	-0.04	-0.41	-0.11	-0.07	-0.59	0.24	-0.02	0.18	0.18	-0.0775	-0.3125	0.1275	0.633927	0.129521	0.458167	0.999971	1	0.888454
Capn10	Q9ESK3	3.02	0.7	-0.07	0.55	0.27	0.41	0.22	0.11	0.46	1.87	-0.51	-0.18	-1.28	-0.12	-0.24	0.07	-0.7975	-0.64	-1.4425	0.219568	0.419793	0.057205	0.999971	1	0.725348
Capn2	O08529	-0.21	-0.26	-0.6	-0.47	-0.31	-0.04	-0.77	-0.14	-0.39	-0.29	-0.81	-0.61	-0.08	-0.07	-0.29	-0.45	0.07	-0.14	0.1625	0.757141	0.491641	0.411785	0.999971	1	0.875847
Capn5	O08688	-0.91	-0.39	-0.87	-0.85	-0.47	-0.04	-0.99	-0.2	-0.29	-0.69	-0.57	-0.5	0.34	-0.44	-0.6	-0.27	0.33	0.2425	0.5125	0.231147	0.247741	0.0775754	0.999971	1	0.752152
Capn7	Q9R1S8	0.16	0.42	0.01	-0.08	-0.04	0.17	-0.39	-0.42	0.32	0.11	0.2	-0.09	-0.32	0.16	-0.4	-0.29	-0.2975	0.0075	-0.34	0.203233	0.969453	0.140543	0.999971	1	0.784948
Capns1	O88456	0.37	-0.17	-0.69	-0.21	-0.15	-0.26	-0.63	0.03	-0.38	-0.09	-0.29	-0.43	-0.01	0.25	-0.29	-0.18	-0.0775	-0.1225	0.1175	0.778382	0.631195	0.662337	0.999971	1	0.936148
Caprin1	Q60865	1.06	1.96	1.45	1.42	1.95	1.8	1.39	1.7	2.3	1.48	1.74	1.9	1.89	1.72	1.45	1.62	0.2375	0.3825	0.1975	0.351848	0.181304	0.420393	0.999971	1	0.87788
Capza1	Q5RKN9	-0.19	-0.09	0	-0.42	-0.1	0.12	-0.47	0.09	-0.02	-0.4	-0.18	-0.41	0	-0.18	0.14	-0.37	0.085	-0.0775	0.0725	0.689877	0.686395	0.719623	0.999971	1	0.954401
Capza2	P47754	-0.96	0.39	0.48	-0.56	0.33	0.45	0.43	0.21	0.55	-0.9	0.56	0.27	0.96	0.2	0.23	-0.49	0.5175	0.2825	0.3875	0.166976	0.548496	0.385981	0.999971	1	0.871816
Capzb	P47757-2	-0.81	-1.45	-0.87	-0.85	-1.41	-1.24	-1.08	-0.72	-1.63	-0.84	-0.71	-0.93	-2.06	-1.38	-1.01	-0.8	-0.1175	-0.0325	-0.3175	0.630834	0.905097	0.333605	0.999971	1	0.857921
Capzb_1	P47757	-0.36	-0.03	0.05	0.24	-0.18	0.09	0.55	0.51	0.21	-0.26	1.2	1.34	0.63	-0.05	0.68	0.75	0.2675	0.6475	0.5275	0.292221	0.125656	0.0617174	0.999971	1	0.725348
Card19	Q9D1I2	0.27	-0.3	0.28	-0.13	-0.26	-0.38	-0.92	-0.11	-0.82	0.41	0.2	0.03	-1.41	-0.4	0.79	0.39	-0.4475	-0.075	-0.1875	0.106014	0.809548	0.693268	0.999971	1	0.947174
Carhsp1	Q9CR86	-1.08	-0.85	-0.96	-1.35	-1.2	-1.69	-0.64	-1.24	-0.68	-0.75	-1.35	-1.13	-0.21	-1.23	-1.01	-1.65	-0.1325	0.0825	0.035	0.616502	0.718196	0.91366	0.999971	1	0.992621
Carm1	D3YUP1	-0.15	0.1	0.56	0.51	0	0.02	0.79	0.32	-0.1	-0.25	0.34	0.29	-0.12	0.08	0.24	0.24	0.0275	-0.185	-0.145	0.918804	0.465438	0.532209	0.999971	1	0.910069
Carmil1	D3Z030	-1	-0.99	-1.06	-1.02	-0.94	-1.06	-0.89	-0.89	-0.66	-0.78	-0.53	-0.73	-0.75	-1.01	-0.87	-0.8	0.0725	0.3425	0.16	0.654548	0.058013	0.347288	0.999971	1	0.864164
Carmil2	S0DHL8	0.17	-0.34	-0.65	-0.91	-0.64	-0.5	-0.04	-0.66	-0.49	-0.33	-0.68	-0.61	0.25	-0.27	-0.6	-0.82	-0.0275	-0.095	0.0725	0.923477	0.720198	0.825718	0.999971	1	0.976715
Carmil3	Q3UFQ8	0.16	-0.6	-0.69	-1.28	-0.37	-0.7	-0.33	-0.51	0.04	0.21	-0.96	-0.42	-0.54	-0.5	-0.2	-0.74	0.125	0.32	0.1075	0.689639	0.411869	0.736888	0.999971	1	0.959447
Carnmt1	Q80UY1	4.48	1.47	2.06	2.18	1.07	1.77	2.27	1.45	1.43	3.9	1.7	1.64	-0.85	0.78	0.17	0.35	-0.9075	-0.38	-2.435	0.183172	0.63572	0.00572618	0.999971	1	0.582714
Cars1	Q9ER72	0.69	1.66	1.08	0.73	1.39	1.31	1.14	0.43	1.54	1.22	1.39	1.73	1.29	1.33	0.71	0.92	0.0275	0.43	0.0225	0.930729	0.135348	0.93688	0.999971	1	0.995618
Cars2	Q8BYM8	0.04	0.48	0.12	0.26	0.53	0.15	-0.48	0.12	0.75	0.28	0.3	0.19	0.42	0.06	0.21	0.14	-0.145	0.155	-0.0175	0.573637	0.461328	0.927019	0.999971	1	0.99417
Cartpt	P56388-2	-0.69	-3.02	-0.88	-0.42	-1.52	-1.96	-1.43	-0.65	-0.47	-1.22	-2.52	-0.2	-0.29	-0.86	0.32	-1.27	-0.1375	0.15	0.7275	0.818399	0.834805	0.265674	0.999971	1	0.842677
Casc3	Q8K3W3	2.19	1.62	1.6	1.88	1.64	1.72	1.63	1.94	1.9	2.11	1.59	1.55	0.57	1.32	1.38	1.52	-0.09	-0.035	-0.625	0.666612	0.877913	0.0448905	0.999971	1	0.710102
Casd1	Q7TN73	0.91	1.18	0.16	-0.07	0.9	1.35	-0.57	0.7	0.98	0.9	0.25	0.59	0.1	2.05	0.67	0.91	0.05	0.135	0.3875	0.915856	0.690719	0.421978	0.999971	1	0.877992
Cask	B1AUH5	-3.9	-0.67	-2.47	-3.51	-1.05	-1.09	-2.93	-3.57	-0.37	-3.86	-2.43	-3.49	0.86	-1.28	-2.78	-3.44	0.4775	0.1	0.9775	0.584511	0.916875	0.371702	0.999971	1	0.869526
Cask_1	O70589	-1.62	-1.73	-1.09	-1.01	-1.54	-1.73	-0.93	-1.03	-1.59	-1.95	-1.05	-0.84	-1.38	-1.48	-1.06	-0.89	0.055	0.005	0.16	0.845057	0.987325	0.535052	0.999971	1	0.910077
Caskin1	Q6P9K8	-0.61	-1.57	-0.74	-0.74	-1.56	-1.41	-0.71	-0.93	-1.48	-0.85	-0.81	-1.17	-1.4	-1.54	-1.06	-0.9	-0.2375	-0.1625	-0.31	0.443274	0.569955	0.287524	0.999971	1	0.846961
Caskin2	Q8VHK1	-1.16	0.23	-0.06	-0.35	0.34	-0.57	-0.35	-0.35	0.33	-2.19	-0.08	-0.08	0.06	-0.59	-0.34	-0.18	0.1025	-0.17	0.0725	0.771264	0.774193	0.825898	0.999971	1	0.976757
Casp1	P29452	-0.76	-0.99	0.04	0.62	-0.79	-0.35	-0.43	0.66	-0.08	-0.84	0.04	0.73	0.57	-0.4	-0.93	0.3	0.045	0.235	0.1575	0.920898	0.612917	0.738362	0.999971	1	0.959976
Casp3	P70677	-0.6	0.21	0.09	-0.03	0.35	0.31	0.07	0.12	0.92	0.49	0.41	-0.38	0.89	0.71	0.2	0.65	0.295	0.4425	0.695	0.221371	0.19722	0.0228938	0.999971	1	0.652043
Casp6	O08738	1.9	1.6	0.81	0.34	2.35	2.55	0.27	0.64	2.54	2.48	-0.15	0.05	1.1	2.6	0.62	0.66	0.29	0.0675	0.0825	0.642922	0.927852	0.878655	0.999971	1	0.985441
Casp7	P97864	2.01	1.05	0.54	0.56	1.26	0.66	0.13	0.43	0.83	1.91	0.35	-0.11	-0.49	0.7	0.43	0.43	-0.42	-0.295	-0.7725	0.309907	0.569799	0.0878477	0.999971	1	0.765196
Casp8	A0A087WQT6	-3.1	-1.42	1.31	1.89	-1.23	-1.59	1.18	1.69	-1.15	-3.03	0.82	1.57	-2.26	-1.72	1.8	0.66	0.3425	-0.1175	-0.05	0.788561	0.932937	0.970404	0.999971	1	0.998787
Casq2	E9PZ67	1.01	0.95	0.07	1.5	0.34	0.7	0.38	-0.13	-0.78	0.82	1.06	-0.28	-0.37	0.14	0.1	0.58	-0.56	-0.6775	-0.77	0.126237	0.194809	0.0520776	0.999971	1	0.723736
Cast	Q8C281	0.73	0.94	0.81	1.09	1.37	0.54	0.93	0.58	0.83	0.31	0.5	1.11	1.05	0.79	1.07	0.86	-0.0375	-0.205	0.05	0.876132	0.382631	0.784385	0.999971	1	0.966376
Castor2	Q8CAB8	1.1	0.86	0.17	-0.25	0.75	1.46	0.3	0.36	0.76	1.13	0.51	0.27	0.77	1.12	0.29	0.95	0.2475	0.1975	0.3125	0.533085	0.580248	0.386435	0.999971	1	0.871816
Cat	P24270	-0.54	-0.89	-0.8	-0.79	-0.57	-0.41	-0.36	-0.33	-0.48	-0.37	-0.36	-0.83	-0.48	-0.73	-0.65	-0.67	0.3375	0.245	0.1225	0.0824724	0.225048	0.495112	0.999971	1	0.901531
Cav1	P49817	-0.1	-0.51	0.32	0.33	3.71	0.71	0.84	-0.56	1.09	0.64	1.52	2.84	-0.87	-0.15	0.76	-0.3	1.165	1.5125	-0.15	0.184034	0.0116701	0.694079	0.999971	1	0.947174
Cavin1	O54724	0.16	-0.16	-0.01	0.78	2.3	0.18	-0.07	-0.38	0.2	1.25	0.76	1.57	-0.8	0.1	0.35	0.32	0.315	0.7525	-0.2	0.594489	0.0602115	0.557793	0.999971	1	0.915051
Cavin2	Q63918	0.6	-0.27	-0.26	0.99	2.16	0.01	0.83	-0.78	0.28	1.05	0.17	0.89	-0.78	-0.06	0	-0.83	0.29	0.3325	-0.6825	0.65154	0.38431	0.0969598	0.999971	1	0.78268
Cavin3	Q91VJ2	1.95	0.67	-0.26	1.51	6.48	2.08	0.96	-0.1	2.5	4.03	2.57	3.74	-0.29	1.42	0.88	0.36	1.3875	2.2425	-0.375	0.320098	0.00380665	0.508595	0.999971	0.969702	0.905815
Cbarp	Q66L44	1.67	-0.84	-0.5	-0.63	-1.41	-0.14	0.38	-1.13	-1.01	0.41	-1.07	-1.03	0.1	-0.91	-0.55	-1.19	-0.5	-0.6	-0.5625	0.451904	0.35414	0.355986	0.999971	1	0.868793
Cbarp_1	E9Q6U0	-0.52	-4.34	-3.06	-3.35	-4.79	-2.57	-2.52	-1.79	-1.49	-1.79	-2.72	-1.83	-5.5	-5.71	-2.47	-3.12	-0.1	0.86	-1.3825	0.91432	0.284771	0.203879	0.999971	1	0.81617
Cbfa2t2	A2AKD9	2.89	1.54	3.5	2.25	1.98	2.9	3.28	3.32	2.39	3.19	3.44	1.17	2.62	2.15	2.61	2.62	0.325	0.0025	-0.045	0.509908	0.996712	0.913789	0.999971	1	0.992633
Cbfb	Q08024-2	-1.23	0.27	0.2	0.67	0.71	0.29	-0.18	0.71	0.17	0.01	0.18	-0.1	0.42	0.68	0.82	0.67	0.405	0.0875	0.67	0.368658	0.828283	0.125421	0.999971	1	0.78268
Cbl	P22682	-0.12	-0.01	0.04	-0.21	0.01	-0.17	0.42	-0.26	-0.11	-0.5	-0.33	-0.19	0.2	-0.02	-0.11	-0.38	0.075	-0.2075	-0.0025	0.722904	0.260882	0.989802	0.999971	1	0.99925
Cblb	B9EKI5	0.65	-0.93	0.29	-0.39	-0.31	-0.44	-0.51	0.11	0.2	-0.2	-0.84	-0.94	0	0.05	-0.47	0.09	-0.1925	-0.35	0.0125	0.603327	0.416656	0.972737	0.999971	1	0.99925
Cbll1	E9QM14	-0.18	0.14	1.02	1.05	-0.13	-0.51	0.85	0.97	-0.22	0.17	0.44	0.61	0.09	-0.01	-0.12	0.92	-0.2125	-0.2575	-0.2875	0.638736	0.473327	0.45581	0.999971	1	0.887217
Cbln1	Q9R171	0.7	-0.48	-0.99	-0.85	-0.53	0.06	-0.01	-0.45	0.13	0.87	-0.52	-1.92	-0.59	0.63	-0.62	-0.76	0.1725	0.045	0.07	0.663695	0.94434	0.881499	0.999971	1	0.986007
Cbln4	Q8BME9	0.92	1.71	-0.14	-0.28	0.82	1.54	-0.32	0.01	1	0.35	0.12	0.01	1.17	2.54	-0.29	0.09	-0.04	-0.1825	0.325	0.944521	0.707932	0.650867	0.999971	1	0.933842
Cbr1	P48758	0.5	-0.11	0.42	0.11	0.14	0.48	1.15	0.26	0.41	0.02	0.09	0.29	0.04	0.24	0.36	-0.23	0.2775	-0.0275	-0.1275	0.337183	0.896914	0.582907	0.999971	1	0.920364
Cbr2	P08074	-0.14	0.48	-0.47	-0.21	3.11	0.76	-0.52	-1.97	2.12	0.82	0.53	1.94	-0.2	0.38	0.09	-1.13	0.43	1.4375	-0.13	0.66182	0.00787134	0.728224	0.999971	1	0.956041
Cbr3	Q8K354	0.99	0.39	0.41	0.2	0.4	0.11	0.07	0.37	0.27	0.85	0.23	0.12	0.25	0.48	0.66	0.16	-0.26	-0.13	-0.11	0.275031	0.617981	0.647342	0.999971	1	0.933613
Cbr4	Q91VT4	-1.14	-0.91	-0.02	-0.48	-0.57	-1.28	-0.08	-0.09	-0.47	-0.96	0.02	0.12	-0.46	-0.87	-0.07	-0.57	0.1325	0.315	0.145	0.717571	0.373895	0.636543	0.999971	1	0.93301
Cbs	Q91WT9-2	0.58	-0.17	0.11	0.41	0	0.16	0.08	-0.13	0.32	0.76	0.15	-0.05	0.39	0.06	0.19	0.58	-0.205	0.0625	0.0725	0.364583	0.81057	0.759762	0.999971	1	0.961116
Cbwd1	Q8VEH6	-1.36	-0.17	-0.9	-0.65	-0.11	-0.36	-0.64	-0.46	-0.08	-1.17	-0.56	-0.28	-0.29	-0.17	-0.83	-0.43	0.3775	0.2475	0.34	0.208088	0.473459	0.270482	0.999971	1	0.843794
Cbx1	P83917	0.22	0.56	0.12	-0.39	0.32	-0.25	-0.64	0.15	0.16	-0.86	-0.25	0.42	1.55	0.74	0.02	-0.47	-0.2325	-0.26	0.3325	0.445706	0.450013	0.470068	0.999971	1	0.892481
Cbx3	Q9DCC5	0.85	0.57	0.16	0.37	0.25	0.38	-0.39	-0.17	0.58	0.44	-0.32	-0.18	0.22	0.34	0.28	0.36	-0.47	-0.3575	-0.1875	0.0944548	0.224788	0.373226	0.999971	1	0.869526
Cbx5	Q61686	-0.21	-0.01	-0.34	-0.63	-0.04	-0.11	-0.45	-0.54	-0.05	-0.37	-0.66	-0.85	0.19	0.04	-0.62	-0.68	0.0125	-0.185	0.03	0.955053	0.458606	0.913439	0.999971	1	0.992618
Cbx8	Q9QXV1	0.38	-0.6	-0.04	0.66	-0.35	-0.45	-0.44	-0.36	-0.48	-0.25	-0.35	-0.37	-1.04	-0.16	0.05	0.38	-0.5	-0.4625	-0.2925	0.109682	0.136639	0.464146	0.999971	1	0.890905
Cby1	Q9D1C2	0.01	-0.12	-1.21	-0.03	0.27	0	-0.44	0.09	-0.43	0.67	-0.84	0.04	0.22	0.35	-0.62	-0.41	0.3175	0.1975	0.2225	0.346941	0.637063	0.54788	0.999971	1	0.911722
Cc2d1a	Q8K1A6	-0.29	-0.25	-0.27	-0.06	0.03	-0.2	-0.27	-0.18	0.04	-0.11	-0.13	0.12	0.5	-0.02	-0.02	0.19	0.0625	0.1975	0.38	0.718768	0.259468	0.0799748	0.999971	1	0.755254
Cc2d1a_1	E9PX94	1.63	1.31	-0.77	-0.21	0.54	1.75	0.28	0.05	1.24	1.87	0.57	-0.49	2.39	0.82	0.95	0.45	0.165	0.3075	0.6625	0.793737	0.6622	0.326154	0.999971	1	0.856472
Cc2d1b	Q8BRN9	0.88	-0.51	-0.35	0.07	-0.5	-0.52	-0.25	-0.13	-0.46	-0.06	-0.1	-0.19	-1.04	-0.71	-0.37	-0.23	-0.3725	-0.225	-0.61	0.270993	0.493922	0.112106	0.999971	1	0.78268
Cc2d2a	Q8CFW7-2	2.5	-1.73	5.62	2.23	-1.01	-0.98	9.3	1.26	-0.51	0.9	3.77	2.03	-3.48	-2.28	2.85	1.71	-0.0125	-0.6075	-2.455	0.996062	0.699707	0.218322	1	1	0.827064
Ccar1	Q8CH18-3	0.86	2.22	2.34	2.48	2.1	1.62	1.93	2.24	1.84	1.1	2.46	2.5	1.79	1.81	2.16	2.47	-0.0025	-3.14018e-16	0.0825	0.994796	1	0.833758	0.999971	1	0.979036
Ccar2	Q8VDP4	2.83	2.42	2.17	2.28	2.01	2.32	2.11	2.02	1.93	2.39	1.91	2.05	1.83	2.4	2.15	2.34	-0.31	-0.355	-0.245	0.166968	0.136172	0.305527	0.999971	1	0.847402
Ccdc106	E9QPN6	-1.27	-2.91	-1.27	-1.05	-2.83	-3.58	-0.94	-0.54	-2.7	-4.52	-2.44	-0.28	-4.4	-1.85	-1.06	-1.44	-0.3475	-0.86	-0.5625	0.651437	0.339611	0.479323	0.999971	1	0.894438
Ccdc107	Q9DCC3	2.58	-0.16	-0.16	1.85	0.38	0.79	-0.06	-0.74	-0.09	1.95	1.65	0.51	0.02	2.69	0.9	1.16	-0.935	-0.0225	0.165	0.204237	0.976661	0.837698	0.999971	1	0.979416
Ccdc115	Q8VE99	1.42	0.62	0.14	0.18	0.8	0.75	0.89	0.68	0.31	0.25	0.15	-0.4	1.44	0.94	0.04	-0.14	0.19	-0.5125	-0.02	0.540078	0.15374	0.964479	0.999971	1	0.998721
Ccdc12	Q8R344	2.77	1.52	2.55	2.86	1.7	2	2.95	1.51	1.55	2.15	1	1.23	0.42	1.66	1.35	1.35	-0.385	-0.9425	-1.23	0.372365	0.0344826	0.0116983	0.999971	1	0.613095
Ccdc120	A2AEV7	-1.6	-0.67	-0.07	-0.9	-0.98	-0.49	-0.74	-0.57	-0.95	-0.35	-0.5	-1.06	0.05	-0.69	-0.54	-0.26	0.115	0.095	0.45	0.730304	0.788146	0.220799	0.999971	1	0.827096
Ccdc124	Q9D8X2	2.11	1.17	1.42	1.7	0.9	1.91	1.93	1.69	1.03	1.95	1.54	1.02	0.81	1.66	1.53	1.43	0.0075	-0.215	-0.2425	0.981149	0.489874	0.411073	0.999971	1	0.875847
Ccdc127	E0CYX9	0.37	-0.07	0.17	0.39	0.02	-0.13	0.14	0.39	-0.4	0.04	-0.11	0.24	0.23	0.4	0.22	0.45	-0.11	-0.2725	0.11	0.597322	0.22727	0.567434	0.999971	1	0.91816
Ccdc134	Q8C7V8	-0.16	0.16	0.98	0.76	-0.02	0.09	0.12	0.86	0.28	0.11	1.04	0.73	0.38	0.35	1.11	1.24	-0.1725	0.105	0.335	0.604586	0.754906	0.349438	0.999971	1	0.865428
Ccdc136	D3Z165	-0.2	-0.36	-1	-1.15	-0.79	-0.2	-1.02	-0.89	-0.85	0.07	-0.97	-0.77	-0.5	0.04	-0.99	-0.7	-0.0475	0.0475	0.14	0.875474	0.886049	0.664953	0.999971	1	0.93697
Ccdc137	Q8R0K4	0.38	-0.01	0.07	0.59	0.23	0.39	-0.06	0.42	-0.1	0.21	-0.23	-0.43	-0.43	0.75	-0.09	-0.03	-0.0125	-0.395	-0.2075	0.954806	0.112046	0.489716	0.999971	1	0.898405
Ccdc141	E9Q8Q6	-0.47	-0.46	-0.12	0.26	-0.78	-0.78	-0.51	-0.12	-0.81	-0.1	-0.26	-0.11	-0.82	-0.5	0.07	0.27	-0.35	-0.1225	-0.0475	0.19708	0.641572	0.878595	0.999971	1	0.985441
Ccdc149	A0A1D5RM99	2.06	0.99	0.69	0.94	0.6	0.75	1.5	0.48	0.82	1.11	0.77	0.17	0.31	0.59	0.55	0.42	-0.3375	-0.4525	-0.7025	0.372636	0.224327	0.0495087	0.999971	1	0.715605
Ccdc167	Q9D162	-0.14	-3.46	-0.39	-0.24	-2.33	-4.44	-0.31	0.16	-4.41	-1.72	-0.37	-0.65	-2.09	-2.4	0.01	-0.18	-0.6725	-0.73	-0.1075	0.571189	0.511033	0.90621	0.999971	1	0.991381
Ccdc177	Q3UHB8	0.17	0.02	0.19	0.1	-0.48	-0.13	0.26	-0.32	-0.38	-0.03	-0.21	-0.26	-0.52	-0.54	-0.2	-0.48	-0.2875	-0.34	-0.555	0.199483	0.0707026	0.0109554	0.999971	1	0.613095
Ccdc184	Q8BMK5	-0.48	0.57	-0.98	-0.52	0.54	0.82	-1.68	-1.52	0.45	0.52	-0.73	-1.24	0.92	0.3	-1.01	-0.33	-0.1075	0.1025	0.3225	0.872266	0.84024	0.517182	0.999971	1	0.905815
Ccdc186	Q8C9S4	1.53	1.38	1.06	1.07	1.23	1.46	1.28	0.86	1.14	1.51	0.82	0.55	0.02	0.93	0.71	0.88	-0.0525	-0.255	-0.625	0.809266	0.339569	0.0391367	0.999971	1	0.700838
Ccdc22	Q9JIG7	0.38	0.27	-0.02	-0.03	0.25	0.36	0.33	-0.17	0.38	0.49	0.07	-0.02	0.16	0.52	-0.07	0.05	0.0425	0.08	0.015	0.840282	0.701428	0.943929	0.999971	1	0.99692
Ccdc25	Q78PG9	0.09	1.6	1.19	1.51	1.21	1.19	1.14	1.52	2.09	0.59	1.67	0.65	2.48	2.23	1.47	1.32	0.1675	0.1525	0.7775	0.635415	0.750093	0.0949284	0.999971	1	0.78268
Ccdc28a	Q3UFK1	-2.66	-1.48	-1.96	-1.93	-1.21	-1.36	-2.02	-2.08	-1.51	-2	-1.66	-2.38	-2.67	-1.37	-3.34	-3.32	0.34	0.12	-0.6675	0.317609	0.703792	0.193756	0.999971	1	0.810547
Ccdc28b	Q8CEG5	-8.64	-7.77	-11.91	0.75	-8.24	0.77	-7.13	-11.03	-8.71	-10.29	-11.92	-10.15	-10.53	0.6	-12.59	0.87	0.485	-3.375	1.48	0.881811	0.19617	0.70937	0.999971	1	0.950625
Ccdc32	Q3UHY7	1.69	0.76	-0.09	0.01	0.68	2.01	-0.3	-0.13	1.96	1.31	-0.04	0.16	1.9	1.22	-0.55	-0.24	-0.0275	0.255	-0.01	0.963981	0.66129	0.987719	0.999971	1	0.99925
Ccdc33	A0A1L1SR74	-0.72	0.83	-0.58	-0.02	0.24	-0.01	0.25	-1.95	-0.06	-0.57	-1.2	-1.92	1.29	0.43	-1.13	-1.94	-0.245	-0.815	-0.215	0.675294	0.129096	0.769911	0.999971	1	0.963498
Ccdc43	Q9CR29	1.81	2.29	2.35	2.71	1.99	2.61	2.08	2.55	2.25	2.55	2.47	2.04	1.75	2.05	1.83	2.6	0.0175	0.0375	-0.2325	0.947325	0.878548	0.418836	0.999971	1	0.87788
Ccdc47	Q9D024	-0.51	-0.35	-0.3	-0.66	-0.02	-0.69	-0.21	-0.49	0.31	-0.37	0	0.35	0.32	-0.62	-0.3	-0.46	0.1025	0.5275	0.19	0.636942	0.0405839	0.455074	0.999971	1	0.887217
Ccdc50	A0A668KL36	0.74	1.05	0.88	1.51	0.97	0.86	0.83	1.19	1.06	1.11	0.88	0.64	0.95	0.58	1.02	0.89	-0.0825	-0.1225	-0.185	0.716404	0.600824	0.433199	0.999971	1	0.882273
Ccdc51	Q3URS9-2	-0.42	-0.09	-0.06	0.04	-0.42	0.04	0.47	-0.2	-0.33	-0.14	-0.43	-0.47	-0.45	-0.11	-0.59	-0.73	0.105	-0.21	-0.3375	0.670065	0.281095	0.14227	0.999971	1	0.784967
Ccdc59	Q32M26	3.33	0.19	0.97	2.07	-0.34	0.85	1.77	0.82	0.2	1.57	1.21	0.14	-1.47	0.52	0.46	0.73	-0.865	-0.86	-1.58	0.254529	0.241303	0.0662356	0.999971	1	0.733937
Ccdc6	D3YZP9	1.43	-0.58	-0.02	0.21	-0.71	0	0.12	0.37	-0.31	0.83	0.17	0.36	-0.48	-0.09	0.23	0.48	-0.315	0.0025	-0.225	0.492849	0.995626	0.615375	0.999971	1	0.927967
Ccdc85a	F6TRJ8	-1.33	-2.03	-0.5	-1.61	-1.16	-1.76	-0.79	-1.93	-1.52	-1.3	-1.16	-0.97	-3.56	-2.17	-1.16	-1.15	-0.0425	0.13	-0.6425	0.915139	0.703004	0.29935	0.999971	1	0.847402
Ccdc85a_1	E0CX32	0.31	-0.16	-0.35	-0.38	-0.31	0.3	0.05	-0.68	-0.15	0.24	-0.34	-0.68	0.01	-0.24	-0.36	-0.48	-0.015	-0.0875	-0.1225	0.957466	0.744588	0.596914	0.999971	1	0.92377
Ccdc85b	Q6PDY0	-0.07	1.5	1.51	1.29	1.36	1.51	1.26	1.93	1.88	1.03	1.99	-0.57	1.02	1.35	1.57	1.46	0.4575	0.025	0.2925	0.260319	0.968909	0.45367	0.999971	1	0.887217
Ccdc85c	A0A217FL83	0.94	-0.14	-0.37	0	-0.59	-0.23	-0.17	-0.37	-0.76	0.32	-0.4	0.32	0.16	-0.36	-0.29	-0.42	-0.4475	-0.2375	-0.335	0.171354	0.53822	0.310242	0.999971	1	0.847402
Ccdc88a	Q5SNZ0-2	0.01	-0.27	-0.45	-0.42	-0.36	-0.07	-0.31	-0.41	-0.13	0.28	-0.04	-0.36	0.08	-0.2	-0.22	-0.18	-0.005	0.22	0.1525	0.97936	0.318077	0.43725	0.999971	1	0.882419
Ccdc88c	Q6VGS5	-0.4	-0.24	1.95	2.95	-0.33	-0.43	2.85	1.47	-0.62	0.19	1.44	0.98	-0.16	0.11	0.98	0.56	-0.175	-0.5675	-0.6925	0.863299	0.510285	0.384463	0.999971	1	0.871816
Ccdc9	D3YW42	1.33	1.03	1.41	1.1	1.07	1.13	1.32	0.9	0.67	1.46	1.32	1.36	0.45	0.97	0.8	1.15	-0.1125	-0.015	-0.375	0.560638	0.94893	0.115055	0.999971	1	0.78268
Ccdc90b	Q8C3X2	-0.17	-0.71	-1.75	-0.62	-0.74	-0.99	-1.2	-0.84	-1.09	-0.4	-1.39	-1.21	-1.24	-0.71	-1.26	-1.04	-0.13	-0.21	-0.25	0.706512	0.587993	0.483849	0.999971	1	0.896352
Ccdc91	Q9D8L5	0.27	0.66	0.65	0.28	0.68	0.4	0.87	0.68	0.27	0.38	0.84	1.13	0.52	0.65	0.31	0.23	0.1925	0.19	-0.0375	0.354636	0.460474	0.853454	0.999971	1	0.98187
Ccdc92	Q8VDN4	0.34	-0.53	0.19	0.02	-0.57	-0.73	0.6	-0.03	-0.8	-0.1	0.04	0.16	-0.49	-0.52	0.03	0.07	-0.1875	-0.18	-0.2325	0.594629	0.547134	0.398168	0.999971	1	0.871816
Ccdc92b	Q5SUE3	0.48	0.53	-0.37	0.08	-0.47	-0.41	0.95	-0.46	0.46	1.48	-1.34	-1.3	1.49	0.69	-0.81	-1.89	-0.2775	-0.355	-0.31	0.484059	0.59415	0.663837	0.999971	1	0.936621
Ccdc93	E9QAD4	0.95	-0.21	-0.4	0.67	-1.26	0.27	0.47	1.46	-0.89	0.65	-0.05	0.1	0.68	0.87	-0.38	1.31	-0.0175	-0.3	0.3675	0.976498	0.495511	0.430075	0.999971	1	0.881611
Ccdc93_1	Q7TQK5	0.35	0.4	0.25	0.12	0.24	0.47	0.21	0.13	0.28	0.21	0.19	0.19	0.34	0.13	0.14	0.15	-0.0175	-0.0625	-0.09	0.921505	0.702649	0.604135	0.999971	1	0.924454
Ccdc97	Q9DBT3	1.47	0.5	0.21	0.26	0.64	0.84	0.27	0.18	0.24	1.08	0.17	0.16	-0.2	0.58	-0.07	0.22	-0.1275	-0.1975	-0.4775	0.701178	0.586958	0.182709	0.999971	1	0.808532
Cck	P09240	-0.96	0.29	-0.61	-1.03	-0.58	0.27	-0.12	-1.01	-0.13	0.44	-0.99	-0.25	-0.13	-0.09	-0.38	-0.23	0.2175	0.345	0.37	0.584243	0.403836	0.258893	0.999971	1	0.839012
Cckbr	P56481	0.08	-1.79	-0.49	0.63	-0.41	-2.48	1.38	-0.92	0.02	-0.8	-0.5	-0.04	0.3	-2.9	-1.23	-0.39	-0.215	0.0625	-0.6625	0.800784	0.903369	0.4045	0.999971	1	0.87384
Ccm2	Q8K2Y9-2	0.57	0.51	0.21	0.58	0.51	0.32	0.57	0.31	0.36	0.28	-0.04	0.43	0.29	0.43	0.26	0.11	-0.04	-0.21	-0.195	0.82777	0.295512	0.30591	0.999971	1	0.847402
Ccn2	P29268	0.42	0.28	-0.37	0.01	0.81	0.79	0.7	-0.5	0.97	0.68	0.51	0.49	0.15	0.41	-0.05	-0.99	0.365	0.5775	-0.205	0.318291	0.035851	0.558179	0.999971	1	0.915051
Ccn3	Q64299	1.49	1.74	1.54	1.89	2.15	2.51	1.76	3.37	2.69	2.16	2.57	2.02	2.74	2.97	3.17	3.09	0.7825	0.695	1.3275	0.048786	0.0120889	9.42433e-05	0.999971	1	0.143156
Ccnk	Q3U3M5	0.77	1.89	2.15	2.49	1.43	1.31	1.5	2.04	1.47	1.29	1.9	2.35	1.95	1.69	2.49	2.71	-0.255	-0.0725	0.385	0.51816	0.862952	0.370181	0.999971	1	0.869526
Ccnl2	Q9JJA7	0.3	0.63	1.43	0.77	0.57	0.67	0.38	1.37	0.41	0.72	0.37	1.42	0.66	1.21	1.22	2.05	-0.035	-0.0525	0.5025	0.913477	0.876127	0.190549	0.999971	1	0.810547
Ccnt1	Q9QWV9	-0.56	0.79	3.84	0.73	0.19	0.63	3.85	2.18	-0.03	0.13	3.44	-2.53	-0.11	0.9	2.53	-0.48	0.5125	-0.9475	-0.49	0.646742	0.497409	0.635659	0.999971	1	0.93301
Ccnt2	Q7TQK0-2	5.12	1.47	3.14	3.64	1.98	2.71	2.97	2.87	1.42	3.52	2.85	2.92	0.12	0.98	3.22	3.81	-0.71	-0.665	-1.31	0.330912	0.410762	0.227097	0.999971	1	0.828236
Ccny	Q8BGU5	-0.62	-0.64	-1.14	-0.71	-0.93	-0.8	-1.46	-0.9	-1.04	-0.71	-1.28	-1.17	-0.37	-0.63	-1.18	-0.67	-0.245	-0.2725	0.065	0.30326	0.229252	0.788362	0.999971	1	0.96741
Ccnyl1	D3YUJ3	-1.22	-2.02	-1.1	-0.97	-1.73	-2.3	-0.96	-0.81	-1.44	-1.36	-0.57	-0.84	-1.17	-1.7	-1.05	-0.88	-0.1225	0.275	0.1275	0.760742	0.397327	0.675757	0.999971	1	0.941576
Ccp110	Q7TSH4	1.77	0.66	-0.12	0.05	0.46	0.76	-0.23	0.43	0.48	1.5	0.23	0.1	0.01	0.01	-0.17	-0.2	-0.235	-0.0125	-0.6775	0.601845	0.979895	0.126608	0.999971	1	0.783193
Ccs	A0A494BB58	1.62	1.54	0.66	0.77	1.39	0.99	0.88	0.8	1.49	1.08	0.53	0.27	1.33	0.26	0.89	0.93	-0.1325	-0.305	-0.295	0.653744	0.410565	0.38772	0.999971	1	0.871816
Ccsap	Q8QZT2	1.91	2.71	2.2	2.3	3.14	2.45	2.05	1.91	3.25	2.06	2.22	2.04	2.51	1.82	1.72	1.81	0.1075	0.1125	-0.315	0.739785	0.73499	0.258558	0.999971	1	0.839012
Ccser1	Q8C0C4-3	-1.42	0.77	0.28	-0.17	0.35	0.2	0.04	0.26	0.05	-1.05	0.4	0.16	1.31	-0.29	-0.56	-0.09	0.3475	0.025	0.2275	0.443465	0.962171	0.693889	0.999971	1	0.947174
Ccser2	Q3UHI0	-0.8	0.28	0.19	-0.93	0.77	-0.22	0.27	-0.24	-0.35	-0.5	0.34	0.43	1.07	-0.32	-0.53	-1.39	0.46	0.295	0.0225	0.250665	0.449992	0.967529	0.999971	1	0.998787
Ccsmst1	Q6RUT7	0.02	0.57	1.3	0.69	0.77	0.85	0.4	0.77	0.43	0.56	1.08	0.92	0.61	0.77	1.22	2.15	0.0525	0.1025	0.5425	0.857463	0.740214	0.212082	0.999971	1	0.823193
Cct2	P80314	-0.19	0.16	0.36	0.48	0	0.03	0.38	0.34	0.03	-0.44	0.21	0.52	-0.13	0.22	0.54	0.69	-0.015	-0.1225	0.1275	0.94581	0.648603	0.624343	0.999971	1	0.930479
Cct3	P80318	0.03	0.13	0.5	0.4	0.03	-0.08	0.27	0.46	-0.01	-0.12	0.3	0.34	-0.04	0.08	0.5	0.46	-0.095	-0.1375	-0.015	0.656925	0.512237	0.945567	0.999971	1	0.997427
Cct4	P80315	0.09	0.7	0.13	0.25	0.67	0.35	0.01	0.23	0.86	0.19	-0.09	0.01	0.89	0.94	0.26	0.21	0.0225	-0.05	0.2825	0.922971	0.854405	0.300997	0.999971	1	0.847402
Cct5	P80316	0.28	0.89	0.97	0.75	0.84	0.81	0.81	0.86	0.84	0.25	0.78	1.2	0.91	0.9	1	0.89	0.1075	0.045	0.2025	0.60683	0.866597	0.345762	0.999971	1	0.863794
Cct6a	Q52KG9	0.39	1.36	0.77	0.77	1.52	1.03	0.73	0.75	1.67	0.51	0.79	0.89	2.13	1.07	0.94	1.08	0.185	0.1425	0.4825	0.521957	0.658467	0.179483	0.999971	1	0.808532
Cct7	P80313	-0.44	0.61	0.5	0.22	0.52	0.5	0.35	0.3	0.56	-0.39	0.27	0.59	0.63	0.34	0.59	0.19	0.195	0.035	0.215	0.46674	0.914806	0.443632	0.999971	1	0.883386
Cct8	P42932	0.24	0.57	0.72	0.59	0.67	0.52	0.74	0.65	0.93	0.49	0.75	0.95	0.66	0.54	0.73	0.77	0.115	0.25	0.145	0.538617	0.233852	0.445144	0.999971	1	0.884152
Ccz1	Q8C1Y8	-0.42	-0.86	0.28	-0.19	-0.67	-0.83	-0.05	0.17	-0.71	-0.66	0.11	-1.09	-0.84	-0.74	0.5	0.1	-0.0475	-0.29	0.0525	0.887372	0.406426	0.892408	0.999971	1	0.98828
Cd109	Q8R422	-0.11	-0.41	-0.71	-0.82	-0.11	-0.05	-0.86	-0.21	-0.29	0	-0.66	-0.71	0.18	0.29	-0.72	-0.18	0.205	0.0975	0.405	0.449842	0.703052	0.187114	0.999971	1	0.809025
Cd151	O35566	2.05	1.83	1.35	2.09	2.46	1.76	2.06	1.58	2.53	2.67	1.45	2.2	2.91	1.42	1.37	0.72	0.135	0.3825	-0.225	0.624896	0.254925	0.628895	0.999971	1	0.932176
Cd163	Q2VLH6	1.99	0.39	-0.41	-0.64	1.5	0.74	-0.78	-0.7	0.79	2.27	-0.87	0.81	-0.31	0.83	-0.74	-0.04	-0.1425	0.4175	-0.3975	0.846504	0.601014	0.527019	0.999971	1	0.909459
Cd180	Q62192	0.41	0.23	-0.29	-0.63	0.46	0.61	-0.06	-0.11	0.31	0.5	-0.2	-0.44	-0.6	0.84	-0.31	-0.75	0.295	0.1125	-0.135	0.348526	0.729207	0.743621	0.999971	1	0.961064
Cd200	Q80VX2	-1.73	-1.94	-0.92	-0.36	-0.84	-1.59	-0.41	-0.64	-0.65	-2.49	-0.42	-0.77	-0.51	-1.34	-0.8	-0.14	0.3675	0.155	0.54	0.395224	0.779783	0.222831	0.999971	1	0.827753
Cd276	Q8VE98	-2.28	0.2	-1.33	-2.78	-1.51	-1.91	-2.2	-1.61	-0.47	-1.04	-3.29	-0.94	-1.45	-2.61	-2.1	-1.89	-0.26	0.1125	-0.465	0.673254	0.891144	0.471578	0.999971	1	0.892857
Cd2ap	Q9JLQ0	0.26	0.12	-0.31	0.71	0.44	-0.2	-0.2	0.16	0.15	0.49	-0.37	0.01	-0.39	0.46	0.19	0.16	-0.145	-0.125	-0.09	0.604207	0.664887	0.755751	0.999971	1	0.961116
Cd2bp2	Q9CWK3	2.39	2.21	2.67	2.1	1.73	1.8	1.73	1.81	2.31	2.84	1.72	1.51	1.5	2.49	1.87	1.56	-0.575	-0.2475	-0.4875	0.0142328	0.454915	0.105009	0.999971	1	0.78268
Cd34	Q64314	-0.47	-0.14	1.3	1.6	-0.32	-0.69	0.26	1.55	-0.82	-1.79	1.16	-0.49	-0.58	-1.16	0.72	0.92	-0.3725	-1.0575	-0.5975	0.567581	0.171508	0.373111	0.999971	1	0.869526
Cd36	Q08857	-1.39	-0.8	-0.85	0.2	-0.43	-0.97	-2.65	-1.41	-0.63	-1.93	-2.96	-1.88	0.05	-0.83	-0.73	-1.41	-0.655	-1.14	-0.02	0.238661	0.0595784	0.962364	0.999971	1	0.998721
Cd38	P56528	-0.27	2.35	1.55	1.42	2.61	2.38	2.31	1.91	2.42	0.41	1.31	2.41	3.61	1.36	1.85	0.62	1.04	0.375	0.5975	0.0743859	0.578716	0.439329	0.999971	1	0.883105
Cd44	A2APM2	-1.11	-1.08	-1.75	-1.2	-0.71	-0.56	-1.57	-1.51	-0.75	-0.81	-1.45	-0.79	0.01	-0.45	-1.02	-0.04	0.1975	0.335	0.91	0.530623	0.209105	0.0126569	0.999971	1	0.613095
Cd47	A0A2R8VK70	-0.77	0.69	0.41	0.12	0.24	0.91	0.3	0.39	0.42	-0.11	-0.19	-0.76	0.9	0.96	0.01	1.24	0.3475	-0.2725	0.665	0.329764	0.484771	0.121078	0.999971	1	0.78268
Cd47_1	A0A2R8W6P0	-1.13	-0.71	-1.28	-0.92	-0.94	-0.5	-1.74	-1	-1.1	-0.77	-1.36	-1.44	-0.48	-0.61	-1.24	-0.74	-0.035	-0.1575	0.2425	0.905655	0.500281	0.328354	0.999971	1	0.856472
Cd55	Q61475	0.11	0.85	-0.73	-0.88	0.85	0.84	-1.04	-0.89	1.2	0.44	-0.47	-0.51	1.67	1.27	0.07	-0.67	0.1025	0.3275	0.7475	0.864725	0.541962	0.24328	0.999971	1	0.837316
Cd63	A0A1W2P8C6	0.12	-0.02	0.55	-0.66	-0.35	0.71	-0.22	-0.2	0.16	0.1	-0.12	0.17	1.4	1.99	0.97	-0.53	-0.0125	0.08	0.96	0.971048	0.771721	0.106584	0.999971	1	0.78268
Cd81	P35762	0.21	-0.43	0.05	-0.66	-0.8	-0.3	-0.3	-0.05	-0.91	-0.27	-1.13	-0.64	-0.62	-0.64	-0.04	-0.43	-0.155	-0.53	-0.225	0.57563	0.0921048	0.409903	0.999971	1	0.875847
Cd82	P40237	0.83	0	-0.15	-0.84	0.03	0.51	-0.96	-0.49	0.39	0.03	-1.38	-0.87	-0.34	-0.18	-0.71	-1.33	-0.1875	-0.4175	-0.6	0.671766	0.409478	0.166869	0.999971	1	0.800215
Cd9	P40240	-0.16	0.12	-1.26	-1.16	-0.94	0.31	-2.04	-1.65	-0.8	0.29	-2.24	-1.89	-0.1	0.49	-1.35	-1.73	-0.465	-0.545	-0.0575	0.424117	0.386281	0.920277	0.999971	1	0.992702
Cd93	O89103	-0.52	0.98	0.9	0.36	1.69	0.3	0.98	-0.58	1.19	-0.56	1.18	1.56	0.84	0.55	1.7	0.55	0.1675	0.4125	0.48	0.759728	0.455766	0.269306	0.999971	1	0.843504
Cd99	Q8VCN6	1.49	2.21	1.06	1.51	1.8	0.98	0.4	1.14	0.89	1.92	1.02	0.92	2.83	1.78	1.4	1.71	-0.4875	-0.38	0.3625	0.202997	0.279969	0.352067	0.999971	1	0.867656
Cd99l2	A2AP74	0.5	0.31	0.25	0.35	-0.12	0.23	0.09	0.36	0.92	1.05	0.85	1.4	-0.01	-0.25	0.45	1.04	-0.2125	0.7025	-0.045	0.272935	0.00530068	0.880228	0.999971	1	0.985441
Cda	P56389	0.44	-1.29	-0.6	-0.02	-1.46	-0.97	-0.9	0.86	-1.51	-1.41	-1.55	-1.1	-0.92	-0.59	0.76	0.08	-0.25	-1.025	0.2	0.6664	0.0223675	0.685215	0.999971	1	0.944874
Cdc123	Q8CII2	-0.92	0.2	0.7	0.99	-0.63	-0.43	0.25	0.27	-0.15	-0.25	0.79	0.81	-1.26	0.09	0.09	0.69	-0.3775	0.0575	-0.34	0.411778	0.904173	0.535659	0.999971	1	0.910077
Cdc16	Q8R349	-0.01	1.11	0.59	0.56	0.89	0.95	0.08	0.8	1.24	1.02	0.4	0.51	1.42	1.53	0.9	1.09	0.1175	0.23	0.6725	0.706079	0.464678	0.0402931	0.999971	1	0.700838
Cdc23	G3X8W7	-0.25	1.24	1.42	1.2	1.2	1.27	1.52	1.45	2.17	0.34	1.77	1.94	1.55	1.24	1.86	1.08	0.4575	0.6525	0.53	0.248768	0.235144	0.213216	0.999971	1	0.824457
Cdc26	Q99JP4	-0.33	-1.17	-1.72	-0.58	-0.72	-1.43	-0.93	-0.8	-0.84	-1.01	-0.56	-0.58	-1.68	-0.95	-1.52	-1.67	-0.02	0.2025	-0.505	0.953699	0.542636	0.174328	0.999971	1	0.807788
Cdc27	A2A6Q5	0.38	0.63	0.12	0.4	0.29	0.31	-0.1	0.4	0.34	0.23	0.3	0.58	0.51	-0.06	0.37	0.67	-0.1575	-0.02	-0.01	0.451995	0.916296	0.965025	0.999971	1	0.998721
Cdc34	Q8CFI2	0.61	0.7	0.89	1.18	0.78	0.84	0.38	1.77	0.64	0.94	1.46	1.01	0.39	1.01	1.16	1.48	0.0975	0.1675	0.165	0.762219	0.493016	0.557016	0.999971	1	0.915051
Cdc37	Q61081	0.35	0.08	0.17	0.06	0.46	0.43	0.37	0.08	0.46	0.41	0.45	0.42	0.27	0.1	0.2	0.41	0.17	0.27	0.08	0.366758	0.126277	0.653627	0.999971	1	0.934061
Cdc37l1	Q9CZP7-2	1.12	1.39	0.5	0.84	0.93	1.3	0.68	0.87	1.22	1.25	0.95	1.02	1.07	1.33	0.48	0.48	-0.0175	0.1475	-0.1225	0.945437	0.537308	0.681552	0.999971	1	0.943204
Cdc40	Q9DC48	-0.44	0.21	1.01	0.96	-0.02	-0.16	0.4	0.97	0.12	-0.27	0.83	0.78	0	0	0.95	0.97	-0.1375	-0.07	0.045	0.736433	0.866049	0.914627	0.999971	1	0.992633
Cdc42	P60766	-1.01	-0.81	-0.01	-0.16	-1.06	-0.59	-0.1	-0.33	-0.75	-0.87	-0.23	-0.23	-0.85	-0.48	0.09	0.5	-0.0225	-0.0225	0.3125	0.944045	0.940797	0.413518	0.999971	1	0.876261
Cdc42_1	P60766-1	-0.32	-0.19	-1.47	-1.4	-0.28	-0.19	-1.64	-1.19	-0.43	-0.15	-1.39	-1.69	-0.47	-0.18	-1.45	-1.29	0.02	-0.07	-0.0025	0.965299	0.882208	0.995417	0.999971	1	1
Cdc42bpa	D3YYN8	-0.5	-0.34	-0.28	-0.03	-0.42	-0.14	-0.31	0.02	-0.21	-0.33	0.16	0.12	-0.13	-0.1	0	0.28	0.075	0.2225	0.3	0.705294	0.295127	0.153832	0.999971	1	0.795578
Cdc42bpb	Q7TT50	-0.09	0.12	0.07	-0.22	0.15	0.2	0.25	-0.14	0.42	0.1	0.31	0.23	0.34	-0.01	-0.16	-0.37	0.145	0.295	-0.02	0.446659	0.123815	0.926187	0.999971	1	0.99401
Cdc42ep1	A0A0R4J0S1	-1.41	-0.72	-0.86	-1.36	-1.11	-1.17	-1.46	-1.81	-1.19	-1.69	-2.1	-1.35	-0.81	-1.25	-1.32	-1.49	-0.3	-0.495	-0.13	0.267258	0.105255	0.611168	0.999971	1	0.92673
Cdc42ep2	Q8JZX9	-0.84	-0.27	-0.8	0.08	-1.71	-1.66	-1.44	0.34	-1.76	-0.75	-0.52	0.3	0.85	-1.71	-0.51	-0.16	-0.66	-0.225	0.075	0.20767	0.620166	0.887193	0.999971	1	0.987485
Cdc42ep4	Q9JM96	0.15	-0.39	-0.44	-0.34	-0.23	-0.67	0.2	-0.5	-0.2	-0.13	-0.26	0.08	-0.19	-0.83	-0.71	-0.35	-0.045	0.1275	-0.265	0.86155	0.538875	0.28233	0.999971	1	0.844538
Cdc42se2	Q8BGH7	-0.16	-1.15	-0.69	-1.11	-0.79	-1.15	-1.49	-1.31	-1.11	-0.56	-1.26	-0.91	-0.71	-1.05	-1.17	-0.58	-0.4075	-0.1825	-0.1	0.180253	0.530366	0.725604	0.999971	1	0.956041
Cdc5l	Q6A068	0.09	0.16	-0.06	-0.37	0.42	-0.15	0.27	-0.65	0.37	0.05	-0.42	-0.53	0.16	0.29	-0.53	-0.58	0.0175	-0.0875	-0.12	0.950473	0.738408	0.663247	0.999971	1	0.936388
Cdc73	Q8JZM7	0.89	0.58	0.66	0.63	0.47	0.32	0.46	0.93	0.52	0.77	0.77	0.77	0.19	0.69	0.68	0.42	-0.145	0.0175	-0.195	0.484336	0.919469	0.339644	0.999971	1	0.860218
Cdh10	P70408	-0.81	-1.16	-0.95	-0.92	-1.22	-0.96	-0.41	-0.76	-1.29	-0.68	-0.62	-0.65	-1.37	-0.99	-1.01	-0.49	0.1225	0.15	-0.005	0.590976	0.497425	0.982838	0.999971	1	0.99925
Cdh11	P55288	-1.08	-1.06	-1.04	-1.02	-1.19	-1.08	-1.05	-0.86	-1.11	-0.97	-0.95	-0.72	-1.73	-1.19	-1.43	-1.37	0.005	0.1125	-0.38	0.976267	0.510602	0.067118	0.999971	1	0.733937
Cdh12	Q5RJH3	-0.96	-0.36	-0.74	-0.45	-0.89	-1.02	-1.1	-0.75	-0.88	-0.87	-0.7	-0.24	-1.09	-0.68	-1.32	-0.53	-0.3125	-0.045	-0.2775	0.159809	0.848574	0.292644	0.999971	1	0.847402
Cdh13	Q9WTR5	-0.63	-1.5	-1.74	-1.57	-1.32	-1.23	-1.57	-1.38	-1.24	-0.87	-1.7	-1.31	-1.24	-1.21	-1.18	-1.06	-0.015	0.08	0.1875	0.956579	0.79445	0.495504	0.999971	1	0.901531
Cdh18	E9Q9Q6	0.26	-0.64	-1.15	-1.47	-0.39	-0.64	0.16	-1.26	-0.08	-0.31	-0.54	-0.64	-0.95	-1.35	-2.07	-1.74	0.2175	0.3575	-0.7775	0.630669	0.364377	0.0951631	0.999971	1	0.78268
Cdh19	E9Q3A7	-0.61	-1.98	-0.72	-0.99	-1.48	-1.46	-1.2	-1.04	-1.65	-1.34	-0.98	-1.57	-1.28	-1.26	-1.18	-1.06	-0.22	-0.31	-0.12	0.509362	0.376714	0.707981	0.999971	1	0.950182
Cdh2	D3YYT0	-1.02	-1.21	-1.2	-1.15	-1.07	-0.9	-1.18	-1.13	-1.03	-1.2	-1.32	-1.08	-1.23	-1.06	-1.54	-1.13	0.075	-0.0125	-0.095	0.660605	0.94045	0.613711	0.999971	1	0.927364
Cdh20	Q9Z0M3	-0.29	0.61	-1.33	-1.73	-0.51	0.77	-0.47	-1.03	-0.67	0.42	-0.78	-1.13	-1.04	0.81	-1.19	-1.28	0.375	0.145	0.01	0.532934	0.801216	0.987878	0.999971	1	0.99925
Cdh22	Q9WTP5	-3.22	-0.74	-0.72	-0.52	-0.49	-1.62	0.58	-0.24	-0.93	-3.72	-0.1	0.63	-0.91	-1.69	-0.39	-1.39	0.8575	0.27	0.205	0.247057	0.793706	0.748954	0.999971	1	0.961064
Cdh4	P39038	-1.77	-1.92	-0.36	-0.37	-1.51	-1.71	-0.47	-0.49	-1.7	-1.34	-0.42	-0.15	-2.25	-1.87	-0.83	-1.01	0.06	0.2025	-0.385	0.904512	0.70024	0.455533	0.999971	1	0.887217
Cdh5	P55284	0.41	0.49	0.34	1.01	1.47	0.54	0.07	0.12	0.12	0.81	-0.18	0.62	-0.76	0.88	0.6	-0.01	-0.0125	-0.22	-0.385	0.971606	0.449018	0.326969	0.999971	1	0.856472
Cdh6	P97326	-1.02	-1.28	-2.47	-2.35	-1.32	-1.66	-2.6	-2.56	-1.41	-1.13	-2.06	-2.54	-1.21	-1.43	-2.96	-2.61	-0.255	-0.005	-0.2725	0.581283	0.991281	0.60597	0.999971	1	0.924649
Cdh7	Q8BM92	-2.28	-2.57	-1.02	-1.58	-2.23	-2.57	-0.68	-1.48	-2.32	-2.16	-0.86	-0.46	-1.99	-2.24	-1.68	-1.36	0.1225	0.4125	0.045	0.80885	0.451177	0.906712	0.999971	1	0.991405
Cdh8	P97291	-1.13	-0.72	-1.08	-1.83	-0.2	-0.66	-1.34	-1.08	-0.02	-1.04	-0.86	-0.64	-0.08	-1.06	-1.81	-1.66	0.37	0.55	0.0375	0.290323	0.115701	0.930695	0.999971	1	0.994744
Cdh9	F8WHU6	-1.12	-0.97	-1.32	-1.01	-1.15	-0.74	-0.3	-1.08	-0.39	-1.01	-1.19	-0.71	-1.14	-0.88	-1.05	-0.91	0.2875	0.28	0.11	0.253198	0.240407	0.545379	0.999971	1	0.911398
Cdip1	Q9DB75	0.8	-0.45	1.25	1.27	-0.49	0.21	1.35	0.69	0.11	1.02	-0.12	-0.94	0.29	-0.15	0.41	0.23	-0.2775	-0.7	-0.5225	0.594763	0.208647	0.217317	0.999971	1	0.826893
Cdipt	Q8VDP6	-0.96	0.65	0.69	0.56	-0.08	1.13	0.55	0.94	0.15	-0.48	0.93	-0.27	-0.4	1.39	0.58	0.79	0.4	-0.1525	0.355	0.385961	0.748432	0.489385	0.999971	1	0.898346
Cdk11b	A2A9P6	0.49	1.82	1.34	1.39	1.73	1.47	0.6	0.99	1.5	0.8	1.32	1.49	1.59	1.5	1.07	1.24	-0.0625	0.0175	0.09	0.863995	0.956884	0.771329	0.999971	1	0.963498
Cdk13	Q69ZA1	0.02	-2.15	-0.77	-0.85	-1.75	-2.95	-0.08	-1.22	-2.61	-1.35	-0.19	-0.52	-3.31	-2.14	-1.07	-1.81	-0.5625	-0.23	-1.145	0.414635	0.720847	0.0803646	0.999971	1	0.755254
Cdk14	O35495	-1.18	0.21	0.09	-1.19	1.02	0.6	0.83	-0.89	1.22	-0.93	0.37	0.69	1.47	-0.24	-0.62	-0.73	0.9075	0.855	0.4875	0.11753	0.148589	0.415308	0.999971	1	0.876885
Cdk16	Q04735	-0.04	-0.26	-0.56	-0.53	-0.51	-0.32	-0.52	-0.59	-0.32	0.13	-0.21	-0.53	0.01	-0.56	-0.88	-0.45	-0.1375	0.115	-0.1225	0.490764	0.609144	0.626568	0.999971	1	0.930511
Cdk17	Q8K0D0	-1.24	-0.37	-0.15	-0.51	-0.02	-0.47	0.13	-0.13	0.13	-0.7	0.3	0.39	0.79	-0.5	0.09	0	0.445	0.5975	0.6625	0.141812	0.106516	0.0856798	0.999971	1	0.759991
Cdk18	Q04899	-0.72	-0.17	-0.74	-0.75	-0.27	-0.33	-0.78	-0.15	-0.15	-0.48	-0.9	-0.48	0.24	0.05	0.05	-0.34	0.2125	0.0925	0.595	0.374729	0.700437	0.0263295	0.999971	1	0.678474
Cdk19	Q8BWD8	1.6	1.82	1.72	0.94	1.27	1.32	0.33	1.52	1.26	1.49	1.59	1.77	1.32	1.86	1.11	1.24	-0.41	0.0075	-0.1375	0.235539	0.976106	0.620684	0.999971	1	0.929344
Cdk20	Q9JHU3	1.04	0.64	0.41	0.58	0.19	0.44	-0.21	0.79	0.04	0.75	-0.04	0.62	0.1	0.64	-0.43	0.59	-0.365	-0.325	-0.4425	0.197806	0.234839	0.158521	0.999971	1	0.798217
Cdk2ap1	F2Z4B3	1.99	2.71	2.49	2.06	2.08	2.68	1.72	1.94	2.01	3.62	1.43	-0.52	1.39	2.35	1.16	1.87	-0.2075	-0.6775	-0.62	0.469988	0.4012	0.0788751	0.999971	1	0.75432
Cdk4	E9Q9E4	0.35	1.72	0.98	1.42	1.1	0.8	0.83	1.13	0.46	0.87	0.58	1.38	0.76	1.15	1.37	1.55	-0.1525	-0.295	0.09	0.629351	0.414664	0.79155	0.999971	1	0.968737
Cdk5	P49615	0.16	-0.05	0.28	0.29	0.47	0.34	0.01	0.21	0.5	0.19	0.03	0.42	0.75	0.66	0.4	0.67	0.0875	0.115	0.45	0.649955	0.554819	0.035167	0.999971	1	0.69205
Cdk5r1	P61809	-0.31	0.13	0.53	0.38	0.03	0.33	-0.41	0.39	-0.03	-0.06	0.01	0.42	0.7	0.39	-0.01	0.87	-0.0975	-0.0975	0.305	0.724771	0.690553	0.296221	0.999971	1	0.847402
Cdk5r2	O35926	-0.19	-0.29	0.56	0.54	-0.42	0.18	-0.18	0.67	-0.28	0.17	0.42	0.31	-0.66	0	0.26	0.93	-0.0925	7.85046e-17	-0.0225	0.77899	1	0.953528	0.999971	1	0.998056
Cdk5rap3	Q99LM2	1.14	-0.29	0.19	0.39	-0.02	0.2	-0.17	0.4	-0.18	0.56	0.44	-0.07	-0.08	0.32	0.24	0.43	-0.255	-0.17	-0.13	0.439013	0.624203	0.685743	0.999971	1	0.944874
Cdk7	A0A286YDC0	2.14	2.65	1.54	1.6	2.71	2.64	1.53	1.69	2.89	2.22	1.35	1.85	2.45	2.27	1.39	1.43	0.16	0.095	-0.0975	0.681719	0.81188	0.792217	0.999971	1	0.969163
Cdk9	Q99J95	0.54	2.01	1.48	1.54	1.92	1.55	1.45	1.72	1.97	1.02	1.75	1.59	1.94	1.74	1.97	2.03	0.2675	0.19	0.5275	0.420108	0.600989	0.124166	0.999971	1	0.78268
Cdkal1	Q91WE6-2	1.39	1.58	0.29	0.41	1	1.01	0.15	0.35	1.02	0.75	0.61	-0.24	1.65	1.42	0.06	0.18	-0.29	-0.3825	-0.09	0.45714	0.362492	0.854758	0.999971	1	0.982125
Cdkl5	A0A0G2JGW6	-0.2	-0.63	-0.21	-0.43	-0.69	-0.61	0.23	-0.58	-0.7	-0.43	-0.32	-0.44	-0.73	-0.94	-0.78	-0.52	-0.045	-0.105	-0.375	0.863298	0.585843	0.0834589	0.999971	1	0.755254
Cdkn1b	P46414	2.47	0.83	1.74	2.21	1.09	1.02	3.65	0.64	0.97	0.67	1.3	0.92	-0.13	-0.62	0.31	0.69	-0.2125	-0.8475	-1.75	0.763114	0.0462839	0.00296889	0.999971	1	0.575711
Cdkn2aip	Q8BI72	1.87	2.08	1.49	1.66	1.98	2.08	2.04	1.17	1.99	1.57	0.93	1.26	1.04	1.64	1.4	1.06	0.0425	-0.3375	-0.49	0.875242	0.240724	0.0591989	0.999971	1	0.725348
Cdkn2c	Q60772	-0.63	0.73	1.73	2.08	0.73	-0.8	1.61	1.63	0.18	-2.69	2.44	1.93	0.25	0.19	1.41	1.67	-0.185	-0.5125	-0.0975	0.805515	0.663439	0.881382	0.999971	1	0.986007
Cdr2l	A2A6T1	0.48	1.14	0.19	0.89	0.53	0.41	-0.55	0.28	0.19	0.22	-0.02	0.34	0.6	0.45	0.26	0.56	-0.5075	-0.4925	-0.2075	0.143733	0.0756238	0.420164	0.999971	1	0.87788
Cds1	P98191	0.6	0.23	-0.4	-0.54	0.22	0.32	0.18	-0.09	0.13	0.73	-0.3	-0.27	0.29	0.73	-0.55	0.01	0.185	0.1	0.1475	0.532116	0.77734	0.690489	0.999971	1	0.946334
Cds2	Q99L43	1.41	-0.48	0.6	0.78	-0.77	0.17	3.62	-0.43	-0.81	0.24	-0.54	-0.76	-1.05	-0.69	0.05	-0.8	0.07	-1.045	-1.2	0.942261	0.038539	0.0207818	0.999971	1	0.635402
Cdv3	Q4VAA2	0.21	0.02	-0.01	-0.06	0.05	0.09	0.54	-0.52	0.37	0.08	-0.25	-0.07	-0.37	0.04	-0.25	-0.35	-2.45327e-17	-0.0075	-0.2725	1	0.969836	0.166687	1	1	0.800215
Cebpz	A0A0R4J046	0.75	-0.88	9.2	9.49	-1.13	-0.04	5.06	7.96	-0.15	1.67	10.44	9.42	0.15	0.27	9.89	7.51	-1.6775	0.705	-0.185	0.587659	0.836226	0.954923	0.999971	1	0.998056
Cebpzos	Q8BTE5	-2.51	-0.36	-0.88	-0.11	0.37	-1	-1.72	-0.87	-0.67	0.3	-1.01	-0.69	0.24	0.28	-1.02	-1.33	0.16	0.4475	0.5075	0.799554	0.434608	0.424241	0.999971	1	0.879824
Celf1	A0A0R4J0T5	0.52	1.57	1.43	1.26	1.52	1.38	1.14	1.39	1.52	1.48	1.51	1.5	1.65	1.84	1.5	1.3	0.1625	0.3075	0.3775	0.547356	0.250861	0.196943	0.999971	1	0.812891
Celf2	V9GX43	0.86	0.99	1.56	1.83	0.68	0.99	1.76	1.85	0.6	0.56	2.07	1.85	0.38	0.83	1.85	2.21	0.01	-0.04	0.0075	0.977807	0.927123	0.986875	0.999971	1	0.99925
Celf3	A0A0G2JGE2	0.53	1.78	1.16	1.26	1.7	1.67	1.87	0.55	1.93	1.21	0.39	0.27	2.15	1.89	0.49	0.22	0.265	-0.2325	0.005	0.494044	0.599798	0.992169	0.999971	1	0.99925
Celf4	Q7TSY6-4	1.07	1.76	0.33	1.13	1.93	1.51	2.81	0.5	1.67	1.62	0.34	0.64	1.59	1.52	0.56	-0.18	0.615	-0.005	-0.2	0.255133	0.990614	0.677933	0.999971	1	0.942594
Celf5	D3Z580	3.25	1.45	1.46	2.08	0.77	1.51	1.05	2.32	0.77	2.31	1.89	2.03	-0.31	1.08	2.17	1.78	-0.6475	-0.31	-0.88	0.219079	0.543202	0.185908	0.999971	1	0.809025
Celf6	D6RHP1	1.59	0.41	0.9	2.05	0.49	1.22	0.58	1.67	0.21	0.45	0.22	1.79	0.25	1.56	1.68	0.18	-0.2475	-0.57	-0.32	0.57054	0.263464	0.531717	0.999971	1	0.910069
Celsr2	Q9R0M0	0.71	-0.33	-0.48	-0.3	-0.26	0.12	0.01	-0.23	-0.33	0.65	-0.24	-0.38	0.02	0.08	-0.38	-0.4	0.01	0.025	-0.07	0.973148	0.944257	0.82029	0.999971	1	0.975761
Cemip2	Q5FWI3	-1.47	-1.27	-0.98	-0.92	-1.08	-1.3	-1.17	-0.99	-1.4	-1.07	-0.89	-0.42	-0.7	-1.01	-0.32	-0.64	0.025	0.215	0.4925	0.901239	0.421465	0.057156	0.999971	1	0.725348
Cend1	Q9JKC6	1.42	-1.27	-0.67	-0.21	-1.7	-0.8	0.86	-0.91	-1.42	-0.18	-1.06	-1.53	-1.82	-1.62	-0.97	-1.12	-0.455	-0.865	-1.2	0.527639	0.174121	0.0575815	0.999971	1	0.725348
Cenpa	A0A0G2JGI2	0.18	-1.35	-1.4	-4.47	-1.56	-1.67	-0.96	-3.6	-0.94	-1.13	-1.8	-1.61	-1.45	-2.69	-2.71	-4.84	-0.1875	0.39	-1.1625	0.85249	0.66546	0.295204	0.999971	1	0.847402
Cenpv	Q9CXS4	-0.09	-1.37	-1.12	-1.39	-1.17	-1.2	-0.47	-1.46	-0.88	-0.6	-1.43	-1.59	-1.22	-1.19	-1.36	-1.68	-0.0825	-0.1325	-0.37	0.820494	0.723545	0.276655	0.999971	1	0.843794
Cep112	Z4YKK6	1.01	0.37	0.93	0.94	0.02	0.82	-0.18	1.41	-0.21	1.23	1.28	0.72	-1.38	0.16	0.61	0.22	-0.295	-0.0575	-0.91	0.448089	0.875318	0.0634048	0.999971	1	0.725348
Cep128	Q8BI22	0.71	0.12	2.02	0.57	-1.24	0.79	2.27	-0.92	-0.93	1.03	-0.01	-1.3	-0.69	-0.61	-0.16	-0.82	-0.63	-1.1575	-1.425	0.448896	0.0840012	0.00705129	0.999971	1	0.582714
Cep131	B1AXI9	1.66	0.4	-0.24	-0.13	-0.09	0.73	-0.16	-0.21	0.53	1.55	-0.01	-0.03	-0.47	0.46	-0.15	0.02	-0.355	0.0875	-0.4575	0.446192	0.868785	0.322657	0.999971	1	0.85548
Cep135	Q6P5D4	0.2	0.27	-0.32	-0.32	0.37	-0.16	-0.36	-1.1	0.48	-0.29	-0.37	0.04	0.37	-0.15	-0.41	-0.22	-0.27	0.0075	-0.06	0.436296	0.977769	0.815748	0.999971	1	0.974918
Cep170	Q6A065	-0.47	-1.2	-1.2	-1.46	-1.19	-1.26	-0.82	-1.58	-0.98	-0.87	-1.18	-1.12	-0.87	-1.27	-1.64	-1.41	-0.13	0.045	-0.215	0.643985	0.85718	0.454728	0.999971	1	0.887217
Cep170_1	A0A0A6YX99	0.75	1.35	-1.1	0.93	1.7	1.1	0.06	1.06	1.14	-0.17	2.08	-0.03	0.36	-1.63	2.11	0.4	0.4975	0.2725	-0.1725	0.404991	0.694362	0.837726	0.999971	1	0.979416
Cep170b	Q80U49	0.28	-0.07	0.42	0.63	-0.05	0.16	1.2	0.48	0.21	0.26	0.35	0.16	0.3	0	0.21	0.24	0.1325	-0.07	-0.1275	0.674797	0.731653	0.55091	0.999971	1	0.913169
Cep41	Q99NF3	0.81	0.92	0.49	0.78	1.03	0.57	0.17	0.84	0.99	0.93	0.24	0.51	0.11	1.12	0.56	0.54	-0.0975	-0.0825	-0.1675	0.686274	0.724757	0.51436	0.999971	1	0.905815
Cep76	Q0VEJ0	0.79	1.66	2.44	2.42	1.02	1.54	1.47	2.21	0.97	1.49	1.09	1.32	1.89	1.58	2.32	3.38	-0.2675	-0.61	0.465	0.543001	0.146483	0.376547	0.999971	1	0.870465
Cep97	Q9CZ62	1.64	1.41	0.65	1	1.72	2.13	1.01	0.97	1.14	1.89	0.41	0.48	1.82	1.61	0.41	0.29	0.2825	-0.195	-0.1425	0.429984	0.622351	0.740768	0.999971	1	0.960899
Cept1	A0A0A6YXR0	-0.42	1	0.05	-0.18	0.89	1.04	-0.06	-0.18	0.54	0.76	0.47	0.49	0.63	0.83	0.57	0.19	0.31	0.4525	0.4425	0.467694	0.181721	0.211272	0.999971	1	0.823077
Cerk	Q8K4Q7	1.25	-1.81	-1.81	-1.17	-2.91	-2.12	1.81	-1.57	-2.59	0.13	-3.39	-2.4	-2.75	-1.94	-2.86	-1.74	-0.3125	-1.1775	-1.4375	0.782204	0.235315	0.0680754	0.999971	1	0.733937
Cers1	P27545	-3.21	-3.44	-1.52	-2.54	-2.19	-4.28	-0.34	-1.61	-2.15	-3.4	-0.09	0.1	-1.94	-3.12	-1.43	-1.87	0.5725	1.2925	0.5875	0.497261	0.156641	0.276457	0.999971	1	0.843794
Cers2	Q924Z4	-1.07	-1.63	-0.83	-1.38	-1.41	-0.8	-0.03	-0.94	-0.75	-0.24	-0.29	0.62	-0.32	-0.58	-0.82	-0.81	0.4325	1.0625	0.595	0.217072	0.0107866	0.034712	0.999971	1	0.69205
Cers4	Q9D6J1	1.11	0.37	-0.45	-0.01	0.79	0.67	0.45	-0.27	0.33	1.2	-0.01	-0.76	0.53	0.11	-1.08	-0.34	0.155	-0.065	-0.45	0.692624	0.894261	0.330754	0.999971	1	0.857107
Cers6	H3BL08	-1.56	0.34	-0.58	-4.18	0.56	-0.36	0.39	-2.41	1.15	-1.66	1.49	1.65	1.43	-0.54	-0.98	-4.01	1.04	2.1525	0.47	0.34024	0.0821049	0.723283	0.999971	1	0.955258
Cert1	Q9EQG9	-0.43	1.05	0.72	0.39	1.15	1.21	0.97	0.61	1.33	-0.12	1.06	0.86	0.81	0.77	0.92	0.46	0.5525	0.35	0.3075	0.132119	0.420119	0.366512	0.999971	1	0.869526
Ces1c	P23953	3.56	2.39	0.23	3.85	4.32	2.96	2.88	1.92	2.84	1.78	2.07	2.35	1.42	2.51	1.34	1.95	0.5125	-0.2475	-0.7025	0.554848	0.74923	0.3792	0.999971	1	0.871816
Cetn2	Q9R1K9	-1	-1.23	-0.79	-0.76	-0.94	-1.03	-0.67	-0.87	-0.77	-1.31	-0.97	-0.47	-0.76	-0.98	-0.56	-0.84	0.0675	0.065	0.16	0.730521	0.78534	0.431713	0.999971	1	0.881643
Cetn3	A0A286YDP0	-2.77	-3.38	-0.25	-0.69	-2.36	-2.47	-0.18	-0.57	-2.55	-2.76	-0.44	-0.27	-2.48	-1.89	-0.68	-0.35	0.3775	0.2675	0.4225	0.665749	0.770591	0.61083	0.999971	1	0.92673
Cetn4	Q8K4K1-3	1.07	0.33	-0.06	0.22	0.86	1.6	0.11	1.56	0.28	0.9	0.4	0.29	-1.59	0.58	0.65	0.88	0.6425	0.0775	-0.26	0.140179	0.79112	0.65207	0.999971	1	0.933842
Cfap20	Q8BTU1	1.43	0.58	1.22	0.99	1	1.03	1.41	1.02	1.18	1.32	1.18	1.6	0.64	0.5	0.79	0.77	0.06	0.265	-0.38	0.802645	0.28349	0.128301	0.999971	1	0.784699
Cfap298	Q8BL95	1.79	-1.2	0.17	0.33	-0.62	-0.24	0.08	1.04	-0.9	0.66	0.37	0.61	-1.22	-1.02	0.76	0.49	-0.2075	-0.0875	-0.52	0.747103	0.893096	0.476309	0.999971	1	0.894333
Cfap300	Q8CC70	1.55	0.37	2.11	0.94	0.6	0.71	-0.39	2.31	0.27	0.17	1.33	0.31	-0.36	-0.74	1.57	1.61	-0.435	-0.7225	-0.7225	0.484683	0.127301	0.291193	0.999971	1	0.847402
Cfap36	Q8C6E0	0.97	0.85	1.18	0.92	0.77	0.83	1.1	1.12	0.54	0.98	1.16	0.98	0.1	0.39	0.82	1.03	-0.025	-0.065	-0.395	0.893235	0.748185	0.140557	0.999971	1	0.784948
Cfap410	Q8C6G1	-0.06	0.45	-0.05	0.07	0.54	0.2	0.15	-0.2	0.66	-0.35	-0.15	0.02	1.41	0.88	-0.18	0.5	0.07	-0.0575	0.55	0.761924	0.830006	0.142496	0.999971	1	0.784967
Cfap418	B1AV75	0.36	0.37	1.4	1.17	0.25	1.43	2.72	0.86	0.77	-0.54	1.15	1.04	-0.8	-0.44	1.2	0	0.49	-0.22	-0.835	0.379118	0.625204	0.108223	0.999971	1	0.78268
Cfap74	G3UWF6	3.51	3.46	1.74	1.96	2.49	3.63	0.88	1.35	3.08	3.84	1.09	0.61	2.55	3.13	1.33	1.73	-0.58	-0.5125	-0.4825	0.418	0.537494	0.408705	0.999971	1	0.875014
Cfdp1	O88271	0.43	3.01	2.6	3.14	3.72	0.93	2.91	2.51	3.94	0.4	2.37	1.73	4.21	0.24	2.44	2.08	0.2225	-0.185	-0.0525	0.774471	0.832585	0.954598	0.999971	1	0.998056
Cfh	E9Q8I0	2.08	1.65	0.63	0.95	2.45	1.29	1.28	0.83	1.24	1.58	1.25	1.39	1.54	1.75	1.13	0.88	0.135	0.0375	-0.0025	0.763849	0.911088	0.994637	0.999971	1	1
Cfl1	P18760	0.72	0.47	-0.07	0.41	0.81	0.66	0.27	0.05	0.72	0.57	0.05	-0.12	1.36	0.67	-0.02	0.28	0.065	-0.0775	0.19	0.804733	0.779311	0.578028	0.999971	1	0.918596
Cfl2	P45591	0.25	0.08	0.23	0.43	0.54	1.21	0.14	0.38	1.34	0.33	0.08	0.11	1.52	0.69	0.2	0.48	0.32	0.2175	0.475	0.243089	0.489329	0.141853	0.999971	1	0.784967
Cgn	D3YUW7	2.83	1.16	1.85	2.15	0.62	0.8	2.15	1.45	0.84	1.71	1.09	1.12	-0.35	0.25	1.57	0.62	-0.7425	-0.8075	-1.475	0.132821	0.0590084	0.0146204	0.999971	1	0.613095
Cgnl1	B2RSU6	0.53	-0.07	0.72	0.19	0.87	-0.1	-0.03	-0.17	0.11	0.62	0.63	1.2	-0.26	0	0.86	0.35	-0.2	0.2975	-0.105	0.519875	0.325332	0.732601	0.999971	1	0.956652
Cgref1	E9QPK1	1.21	0.73	0.55	0.67	0.75	0.77	0.36	0.9	0.66	0.17	0.58	0.51	-0.14	1.11	0.89	0.93	-0.095	-0.31	-0.0925	0.675855	0.184412	0.773515	0.999971	1	0.963759
Chac2	Q9CQG1	0.53	0.33	0.9	0.14	0.13	-0.02	0.31	0.27	0.11	0.6	0.87	1.02	-0.67	0.04	0.28	0.37	-0.3025	0.175	-0.47	0.195757	0.527813	0.139509	0.999971	1	0.784948
Chadl	E9Q7T7	0.73	0.83	1.37	0.78	0.1	0.29	0.99	1.05	0.4	0.91	0.74	0.91	-0.2	0.43	0.88	0.67	-0.32	-0.1875	-0.4825	0.293261	0.419576	0.123145	0.999971	1	0.78268
Champ1	Q8K327	0.35	0.44	0.42	0.52	0.4	0.14	0.17	0.48	0.28	0.37	0.23	0.54	0.44	0.6	0.38	0.83	-0.135	-0.0775	0.13	0.450536	0.644303	0.484172	0.999971	1	0.896352
Chat	Q8BQV2	-0.16	-0.38	-1.19	-0.47	0.02	-0.51	-1.08	-0.6	-0.14	-0.23	-1.38	-1.17	-0.47	-0.15	-0.79	-1.23	0.0075	-0.18	-0.11	0.981248	0.634754	0.734078	0.999971	1	0.957685
Chchd1	Q9CQA6	1.09	2.23	2.12	1.87	1.6	1.48	1.06	1.67	1.93	0.85	0.53	2.59	1.76	0.97	1.79	2.09	-0.375	-0.3525	-0.175	0.231597	0.491209	0.616369	0.999971	1	0.928229
Chchd10	Q7TNL9	0.54	0.27	2.01	0.71	0.94	0.67	1.53	0.8	1.15	-0.04	0.41	1.29	1.25	0.47	0.75	0.33	0.1025	-0.18	-0.1825	0.802719	0.701214	0.662253	0.999971	1	0.936148
Chchd2	Q9D1L0	1.03	0.42	0.36	0.37	0.38	0.89	0.42	0.5	0.57	0.98	0.84	0.1	0.3	1.19	0.33	-0.08	0.0025	0.0775	-0.11	0.991509	0.774747	0.729653	0.999971	1	0.956041
Chchd3	Q9CRB9	-0.09	-0.65	-0.24	0.21	-0.76	-0.55	0.78	-0.46	-0.21	-0.49	-0.51	-0.74	-0.59	-1.05	-0.32	-0.84	-0.055	-0.295	-0.5075	0.884299	0.238842	0.0795717	0.999971	1	0.755254
Chchd3_1	D3Z0L4	-2.32	5.07	5.29	2.17	9.38	4.76	6.05	2.86	11.83	2.17	6.47	7.63	17.46	2.03	3.6	0.45	3.21	4.4725	3.3325	0.132168	0.0869404	0.390666	0.999971	1	0.871816
Chchd4	Q8VEA4	1.58	2.6	1.57	1.59	2.66	3.04	1.19	1.52	2.9	1.92	1.01	0.43	2.92	2.51	1.46	1.68	0.2675	-0.27	0.3075	0.578178	0.627014	0.459321	0.999971	1	0.889191
Chchd5	Q9CQP3	0.68	1.61	-1.15	-1.88	1.28	1.13	-1.24	-1.55	0.83	1.04	-1.45	-1.56	1.71	1.03	-1.17	-0.87	0.09	-0.1	0.36	0.927077	0.917276	0.708102	0.999971	1	0.950182
Chchd6	Q91VN4	0.08	-0.46	-0.41	-0.65	-0.11	-0.54	-0.07	-0.59	-0.44	0.07	-0.39	-0.62	-0.18	-0.3	-0.54	-0.77	0.0325	0.015	-0.0875	0.892383	0.950702	0.71411	0.999971	1	0.952257
Chchd7	Q8K2Q5	0.05	1.21	1.17	0.43	1.05	0.99	2.12	1.59	0.97	0.31	1.59	2.33	-0.03	0.82	1.08	0.47	0.7225	0.585	-0.13	0.0816873	0.246607	0.72175	0.999971	1	0.955137
Chd2	E9PZM4	0.43	-0.38	0.2	0.13	-0.4	-0.17	0.35	-0.11	-0.36	0.34	-0.13	-0.34	-0.03	-0.01	0.13	0.22	-0.1775	-0.2175	-0.0175	0.495564	0.409488	0.937577	0.999971	1	0.995618
Chd3	B1AR17	1.23	0.94	0.84	0.82	0.97	1.1	0.79	0.78	0.83	1.33	0.96	0.78	0.61	0.95	0.48	0.9	-0.0475	0.0175	-0.2225	0.802462	0.932134	0.29196	0.999971	1	0.847402
Chd4	E9QAS4	1.01	1.36	1.01	1.13	1.35	1.26	0.73	0.99	1.27	0.93	1.13	1.33	1.31	1.12	1.26	1.37	-0.045	0.0375	0.1375	0.831914	0.840592	0.451549	0.999971	1	0.886993
Chd5	E9PYU4	0.11	0.64	1.15	1.58	0.74	1.24	0.74	0.97	2.19	0.85	0.86	1.12	1.58	1.9	0.56	1.13	0.0525	0.385	0.4225	0.876086	0.378735	0.318932	0.999971	1	0.853893
Chd6	A3KFM7-2	0.01	-1.38	0.04	-0.56	-1.24	-1.75	-0.98	-0.23	-1.19	-0.92	-0.72	0	-1.24	-1.38	-0.53	-1.54	-0.5775	-0.235	-0.7	0.205342	0.562155	0.0973161	0.999971	1	0.78268
Chd8	Q09XV5	0.94	1.68	1.19	0.88	1.8	1.12	0.47	1.28	1.39	0.96	0.83	0.81	2.08	1.25	1.15	0.94	-0.005	-0.175	0.1825	0.987849	0.492936	0.565021	0.999971	1	0.917442
Chd9	Q8BYH8-2	2.03	3.01	1.59	1.38	2.07	3.29	3.12	-0.56	2.69	2.74	-1.34	-1.3	3.2	2.67	-1.93	-2.22	-0.0225	-1.305	-1.5725	0.979099	0.252973	0.256323	0.999971	1	0.839012
Chdh	Q8BJ64	0.14	-0.3	0.24	-0.12	-1.31	-1.45	-0.19	-1	-1.23	-1.02	-1.02	-0.14	-1.61	-1.26	-0.37	-0.53	-0.9775	-0.8425	-0.9325	0.0115148	0.0152837	0.0168364	0.999971	1	0.616254
Cherp	G5E8I8	0.31	1.45	1.08	0.98	1.48	0.9	0.75	0.85	1.27	0.6	1.08	0.95	1.58	1.22	0.9	1.06	0.04	0.02	0.235	0.893207	0.94456	0.428105	0.999971	1	0.880793
Chga	P26339	2.12	0.89	1.1	1.52	0.8	1.49	1.44	1.43	1.13	2.2	1.06	0.92	0.89	1.03	1.22	1.56	-0.1175	-0.08	-0.2325	0.713716	0.835856	0.464514	0.999971	1	0.890905
Chgb	P16014	0.33	-0.34	-0.25	-0.29	-0.11	-0.09	0.15	0.09	-0.31	-0.1	-0.09	-0.21	-0.49	-0.19	-0.02	0.07	0.1475	-0.04	-0.02	0.500791	0.849763	0.932292	0.999971	1	0.995069
Chic1	Q8CBW7	0.36	-0.68	-0.44	0.04	-0.71	-0.52	-0.74	0.58	-1.06	-0.4	-0.05	-0.23	-0.38	-0.02	-0.63	0.07	-0.1675	-0.255	-0.06	0.658973	0.437674	0.839208	0.999971	1	0.979728
Chid1	A0A0R4J242	0.39	0.75	1.19	1.26	0.42	0.55	1.05	1.18	0.34	1.06	0.78	0.78	-0.01	0.59	0.8	1.15	-0.0975	-0.1575	-0.265	0.73556	0.563214	0.417166	0.999971	1	0.877464
Chka	O54804-2	-0.22	0.84	0.34	0.11	1.1	0.15	-0.11	0.27	0.53	-0.56	-0.21	0.17	0.35	-0.28	-0.41	0.1	0.085	-0.285	-0.3275	0.802741	0.391044	0.28282	0.999971	1	0.844538
Chkb	O55229	-0.67	0.07	0.31	0.05	0.15	-0.63	0.15	-0.02	0.19	-1.05	0.51	0.16	0.67	-0.16	0.01	-0.07	-0.0275	0.0125	0.1725	0.924994	0.974323	0.562335	0.999971	1	0.916386
Chl1	P70232-2	-0.19	-2.27	-4.13	-3.58	-1.05	-3.23	-3.89	-2.12	-1.82	-2.59	-2.99	-1.95	-0.9	-1.63	-1.95	-3.76	-0.03	0.205	0.4825	0.975068	0.805018	0.615505	0.999971	1	0.927967
Chl1_1	P70232	0.41	-0.32	-0.26	-0.19	0.11	0.07	-0.09	0.15	-0.03	0.25	-0.03	0.07	0.18	0.43	0.32	0.26	0.15	0.155	0.3875	0.50195	0.489582	0.107006	0.999971	1	0.78268
Chm	A2AD03	-0.54	0.3	0.45	0.37	0.24	-0.03	0.59	0.16	0.37	-0.44	0.29	0.22	0.14	0.01	0.25	0.52	0.095	-0.035	0.085	0.734939	0.90792	0.75642	0.999971	1	0.961116
Chml	Q9QZD5	1.3	1.6	0.05	0.62	1.06	0.91	-0.88	0.08	0.74	0.96	0.39	0.39	0.64	1.43	-0.62	0.37	-0.6	-0.2725	-0.4375	0.268816	0.463309	0.399318	0.999971	1	0.871816
Chmp1a	Q921W0	1.22	0.22	0.97	0.62	0.04	0.8	1.1	1	0.54	0.76	1.55	0.71	-0.32	0.29	1.01	1.18	-0.0225	0.1325	-0.2175	0.94468	0.676181	0.582734	0.999971	1	0.920364
Chmp1b1	Q99LU0	1.13	0.8	1.1	0.13	0.98	1.52	2.09	0.47	1.31	1.13	1.91	1.66	1.56	0.98	0.84	0.03	0.475	0.7125	0.0625	0.254697	0.0386413	0.869036	0.999971	1	0.983462
Chmp1b2	Q9CQD4	0.95	0.86	1.99	1.99	0.57	0.94	4.55	0.17	0.88	0.87	1.35	0.07	0.82	0.62	0.6	-0.28	0.11	-0.655	-1.0075	0.907245	0.124844	0.0262693	0.999971	1	0.678474
Chmp2a	Q9DB34	0.43	0.07	-0.22	0.42	0.02	0.48	0.3	0.68	0.34	0.65	0.2	-0.36	-0.2	0.29	0.15	-0.02	0.195	0.0325	-0.12	0.428456	0.906751	0.60234	0.999971	1	0.924453
Chmp2b	Q8BJF9	0.68	0.74	0.8	0.98	0.82	1.12	1.5	1.02	0.96	0.81	0.74	0.42	0.85	0.37	0.44	0.02	0.315	-0.0675	-0.38	0.156291	0.725207	0.117612	0.999971	1	0.78268
Chmp3	Q9CQ10	-0.38	-0.26	-0.49	-0.55	-0.1	-0.33	-0.2	-0.27	-0.35	-0.41	-0.13	-0.16	-0.43	-0.34	-0.46	-0.6	0.195	0.1575	-0.0375	0.274616	0.37637	0.829199	0.999971	1	0.978248
Chmp4b	Q9D8B3	0.15	0.6	0.46	0.5	0.34	0.67	0.47	0.55	0.51	0.38	0.44	0.29	1.03	0.39	0.39	0.63	0.08	-0.0225	0.1825	0.672573	0.900354	0.421879	0.999971	1	0.877992
Chmp5	Q9D7S9	0.09	-0.12	-0.01	0.32	-0.25	0.01	-0.26	0.26	-0.09	0.1	0.05	0.35	-0.4	-0.04	0.01	0.59	-0.13	0.0325	-0.03	0.535628	0.865269	0.905494	0.999971	1	0.991091
Chmp6	P0C0A3	-1.06	-0.44	-0.44	-1.31	-0.77	-0.61	-0.49	-0.91	-0.51	-1.35	-0.83	-1.01	-0.12	-1.01	-0.96	-1.3	0.1175	-0.1125	-0.035	0.655484	0.701305	0.916796	0.999971	1	0.992633
Chmp7	Q8R1T1	-0.02	-0.02	-0.21	-0.23	-0.05	0	-0.34	-0.39	-0.15	-0.07	-0.31	-0.06	0.11	0.29	-0.14	0.14	-0.075	-0.0275	0.22	0.688447	0.870565	0.249047	0.999971	1	0.839012
Chn1	Q91V57	0.23	0.49	0.86	0.48	0.07	0.21	0.81	0.61	0.18	0.57	0.5	0.88	-0.09	0.49	0.42	0.37	-0.09	0.0175	-0.2175	0.714763	0.939069	0.349116	0.999971	1	0.865162
Chn2	Q3V2R3	0.42	-0.35	-0.84	-0.2	-0.29	-0.69	-0.5	-0.96	-0.21	0.18	-1.05	-0.6	-0.39	-0.19	-0.91	-1.08	-0.3675	-0.1775	-0.4	0.245704	0.625693	0.249984	0.999971	1	0.839012
Chordc1	Q9D1P4	-0.16	0.86	1.08	0.38	0.93	1.13	0.94	0.73	0.76	0.11	0.94	0.77	1.14	0.88	0.85	0.87	0.3925	0.105	0.395	0.208277	0.750741	0.20306	0.999971	1	0.81617
Chp1	P61022	-1.65	-1.61	-1.63	-1.7	-1.41	-1.97	-1.79	-1.53	-1.73	-1.83	-1.5	-1.2	-1.9	-1.9	-1.48	-1.83	-0.0275	0.0825	-0.13	0.886456	0.676876	0.479981	0.999971	1	0.894438
Chpf	Q6IQX7	1.21	0.25	2.09	2.16	0.29	0.09	3.57	1.37	0.09	0.64	1.98	1.81	0.25	0.29	0.37	0.48	-0.0975	-0.2975	-1.08	0.905428	0.615654	0.0306122	0.999971	1	0.678474
Chpf2	Q3UU43	0.64	-0.31	2.67	2.31	0.41	0.33	2.43	2.75	-0.07	1.22	0.99	1.54	0.83	0.38	2.06	1.82	0.1525	-0.4075	-0.055	0.858311	0.571319	0.939898	0.999971	1	0.995869
Chpt1	Q8C025	2.23	-0.97	-1.83	-1.78	-0.87	-0.18	-0.74	-0.66	-0.69	2.81	-0.82	-0.23	-1.18	1.19	-1.16	-1.51	-0.025	0.855	-0.0775	0.97705	0.465814	0.939516	0.999971	1	0.995869
Chrm1	P12657	-0.18	-0.07	0.25	0.11	-0.8	-0.91	0.54	-0.23	-1.14	-0.09	0.11	-0.11	-0.17	-0.8	0.08	0.43	-0.3775	-0.335	-0.1425	0.285995	0.287673	0.624574	0.999971	1	0.930479
Chrm2	Q9ERZ4	0.06	0.02	-1.52	-1.04	-0.72	-0.39	-1.52	-1.21	-0.74	0.44	-2.03	-2.15	-1.86	-1.12	-2.21	-1.35	-0.34	-0.5	-1.015	0.447399	0.458108	0.0431656	0.999971	1	0.701725
Chrm3	Q9ERZ3	-1.97	-0.45	0	-0.92	-1.01	-0.14	-0.56	-0.76	-1.17	-1.01	-0.21	-0.56	-0.53	-0.61	-0.74	-0.41	0.2175	0.0975	0.2625	0.61911	0.827956	0.525566	0.999971	1	0.909437
Chrm4	P32211	0.69	-0.35	-0.14	0.47	-0.02	-0.71	-0.65	-0.08	-0.29	0.19	-0.1	-0.13	-0.44	-0.62	-0.29	-0.09	-0.5325	-0.25	-0.5275	0.11436	0.38294	0.0915047	0.999971	1	0.773779
Chrna4	B7ZBU7	-0.48	0.02	-0.05	-0.03	-0.79	-0.64	-0.76	0.52	-0.73	-0.69	0.07	-0.26	-0.42	-0.89	-0.05	0.21	-0.2825	-0.2675	-0.1525	0.406474	0.298845	0.590809	0.999971	1	0.92226
Chrnb2	A0A0G2JG64	-2.07	-1.54	-1.91	-1.8	-2.2	-2.39	-2.29	-1.45	-1.95	-2.1	-1.79	-2.2	-2.24	-1.9	-2.05	-1.92	-0.2525	-0.18	-0.1975	0.35097	0.375063	0.33196	0.999971	1	0.857152
Chst2	Q80WV3	0.89	-0.52	-0.55	-0.44	-0.63	-0.55	-0.43	-0.2	-0.38	1.17	-0.07	-0.36	-0.3	0.04	-0.64	-0.15	-0.2975	0.245	-0.1075	0.410514	0.608341	0.770445	0.999971	1	0.963498
Chsy3	Q5DTK1	2.41	0.34	0.94	1.91	1.91	-0.11	1.03	1.46	0.87	2.9	1.57	-0.2	-3.66	0.81	1.03	1.01	-0.3275	-0.115	-1.6025	0.57719	0.874259	0.17358	0.999971	1	0.807607
Chtop	E9PW20	-0.05	0.27	0.56	0.81	-0.01	-0.2	0.25	0.92	-0.05	0.22	0.93	0.53	0.24	0.09	0.44	0.47	-0.1575	0.01	-0.0875	0.61585	0.972571	0.716057	0.999971	1	0.952576
Chuk	E9Q605	0.83	0.72	-0.06	-0.24	-0.18	0.21	-0.69	-0.25	-0.04	0.55	-0.05	0.12	-0.03	0.82	-0.12	-0.23	-0.54	-0.1675	-0.2025	0.126058	0.591506	0.572128	0.999971	1	0.91816
Ciao1	Q99KN2	0.7	0.22	-0.54	-0.21	0.09	0.35	1.35	-0.6	0.41	0.2	-0.95	-0.22	-0.36	0.08	-0.8	-1.15	0.255	-0.1825	-0.6	0.578436	0.640354	0.130787	0.999971	1	0.784948
Ciao2a	Q9DCL2	2.42	0.12	-0.19	0.24	0.63	0.42	-0.61	-0.15	1.61	3.86	-0.46	-0.1	0.08	0.79	-0.32	-0.08	-0.575	0.58	-0.53	0.352667	0.57917	0.379744	0.999971	1	0.871816
Ciao2b	Q9D187	-0.04	0.49	0.08	0.45	0.51	0.02	-0.48	-0.39	0.35	-0.14	0.53	0.55	-0.15	0.21	0.19	0.67	-0.33	0.0775	-0.015	0.254787	0.746214	0.951198	0.999971	1	0.998056
Ciao3	Q7TMW6	0.95	0.28	-0.03	-0.46	0.09	0.06	-0.19	-0.17	-0.11	0.36	-0.16	0.35	-0.11	-0.15	0.16	-0.09	-0.2375	-0.075	-0.2325	0.452402	0.81948	0.461712	0.999971	1	0.890095
Ciapin1	Q8WTY4	0.75	1.13	1.31	0.92	1.17	1.23	1.23	0.76	1.67	1.17	1.22	1.5	1.91	1.2	1	1.35	0.07	0.3625	0.3375	0.74449	0.117752	0.210228	0.999971	1	0.822657
Cib1	A0A0U1RPF3	-0.01	-0.86	-1.23	-0.31	-0.17	-0.3	-1.33	-1.52	-0.58	0.04	-1.62	-1.06	-0.13	-0.32	-1.82	-0.57	-0.2275	-0.2025	-0.1075	0.590035	0.635206	0.808037	0.999971	1	0.973362
Cibar1	Q8BP22	0.61	-0.56	0.89	0.8	-0.32	0.1	0.95	0.85	-0.01	0.34	1.02	0.53	-1.05	-0.04	0.57	0.17	-0.04	0.035	-0.5225	0.925675	0.927591	0.267322	0.999971	1	0.842677
Cic	Q924A2	2.38	2.56	2.56	3	2.25	1.99	1.9	1.97	2.45	2.53	1.33	1.98	1.3	2.13	2.06	2.27	-0.5975	-0.5525	-0.685	0.0166203	0.102604	0.031537	0.999971	1	0.678474
Cirbp	P60824	2.15	0.98	1.05	0.58	0.23	0.95	1.46	0.71	0.67	0.82	0.48	0.43	-0.18	0.19	0.97	-0.13	-0.3525	-0.59	-0.9775	0.392697	0.113722	0.038234	0.999971	1	0.700838
Cisd1	Q91WS0	-0.64	0.58	0.04	0.55	0.91	0.74	2.03	0.31	1.66	0.46	0.41	1.63	2.16	0.69	0.24	-0.8	0.865	0.9075	0.44	0.0749331	0.059837	0.483003	0.999971	1	0.896345
Cisd2	Q9CQB5	-0.16	0.1	0.27	0.16	0.23	0.23	-0.04	0.32	0.12	0.1	0.39	0.45	0.39	0.41	0.68	0.16	0.0925	0.1725	0.3175	0.626359	0.375882	0.138598	0.999971	1	0.784948
Cisd3	Z4YKM2	1.09	1.05	1.18	0.9	0.76	1.57	1.32	0.99	0.63	1.32	1.1	1.76	0.98	1.41	1.06	0.89	0.105	0.1475	0.03	0.646131	0.57792	0.876703	0.999971	1	0.985129
Cit	E9QL53	-0.62	-1.24	-0.88	-0.85	-1.21	-1.11	-0.67	-0.79	-1.16	-0.74	-0.74	-1.06	-1.16	-1.08	-0.84	-0.73	-0.0475	-0.0275	-0.055	0.831535	0.897142	0.796215	0.999971	1	0.970435
Ciz1	Q3UUV0	0.28	-1.4	-1.34	0.98	-2.11	-1.19	-0.02	1.21	-0.32	-0.8	-0.63	-0.02	-0.44	0.08	-0.01	1.44	-0.1575	-0.0725	0.6375	0.850841	0.898844	0.343961	0.999971	1	0.862346
Ckap4	Q8BMK4	0.85	0.5	0.22	0.46	0.63	0.19	0.64	0.44	1.09	0.87	1.01	0.89	0.96	0.28	0.24	0.77	-0.0325	0.4575	0.055	0.879645	0.0421215	0.826004	0.999971	1	0.976757
Ckap5	A0A0R4J0K2	-0.3	-0.63	-0.51	-0.61	-0.47	-0.6	-0.51	-0.52	-0.45	-0.5	-0.44	-0.39	-0.53	-0.65	-0.41	-0.39	-0.0125	0.0675	0.0175	0.941948	0.688539	0.922007	0.999971	1	0.993069
Ckb	Q04447	-0.25	0.29	0.41	0.37	-0.12	-0.19	-0.07	0.33	-0.25	-0.75	-0.21	-0.07	-0.31	-0.06	0.26	0.32	-0.2175	-0.525	-0.1525	0.358291	0.0553157	0.536883	0.999971	1	0.910077
Ckm	A0A0J9YKD4	-1.2	1.1	4.35	1.83	0.89	-0.41	2.72	1.32	-1.74	-1.43	1.66	-4.24	-0.81	0.64	1.62	1.22	-0.39	-2.9575	-0.8525	0.738875	0.0736461	0.455803	0.999971	1	0.887217
Ckmt1	P30275	-0.25	-0.62	0.23	0.13	-0.88	-0.53	0.04	0.16	-0.78	-0.56	0.04	0.01	-0.55	-0.33	0.13	0.36	-0.175	-0.195	0.03	0.582362	0.510718	0.919044	0.999971	1	0.992633
Ckmt2	Q6P8J7	1.53	4.15	3.58	3.4	3.01	4.09	2.25	3.66	2.56	2.93	3.07	2.36	2.03	4.42	3.2	4.18	0.0875	-0.435	0.2925	0.889851	0.434676	0.682339	0.999971	1	0.943204
Clasp1	A0A087WRE8	1.52	1.92	0.63	-1.01	1.18	1.56	-0.1	-0.24	1.16	0.42	0.74	-0.33	1.52	0.37	-1.04	0.51	-0.165	-0.2675	-0.425	0.817592	0.686241	0.576835	0.999971	1	0.918194
Clasp1_1	E9QKH0	-0.13	0.29	0.48	0.57	-0.79	0.37	-0.24	-0.45	-0.43	-0.22	0.01	0.77	-0.5	0.88	1.42	0.61	-0.58	-0.27	0.3	0.0785067	0.393418	0.474218	0.999971	1	0.894044
Clasp1_2	A0A087WQ31	0.02	0.12	0.24	-0.33	0.18	0.17	0.85	-0.45	0.47	-0.14	0.15	0	0.36	-0.27	-0.41	-0.72	0.175	0.1075	-0.2725	0.56425	0.627266	0.337211	0.999971	1	0.858827
Clasp2	Q08EB5	1.79	3.81	2.18	2.42	3.02	3.86	2.89	1.61	4.19	4.16	2.91	2.74	5.47	3.37	1.37	2.11	0.295	0.95	0.53	0.616216	0.108768	0.55801	0.999971	1	0.915051
Clasp2_1	Q8BRT1-5	-0.32	1.8	0.36	-0.07	1.01	1.49	-0.15	-0.03	0.97	0.16	0.15	0.31	1.29	1.3	0.04	0.27	0.1375	-0.045	0.2825	0.80883	0.925139	0.599719	0.999971	1	0.92422
Clasp2_2	Q08EB6	-0.43	-0.64	-0.76	-0.84	-0.62	-0.68	-0.6	-0.74	-0.2	-0.35	-0.55	-0.55	0.02	-0.78	-0.73	-0.65	0.0075	0.255	0.1325	0.966231	0.197074	0.585001	0.999971	1	0.920413
Clasp2_3	F7DCH5	-0.6	-1.57	-1.35	-0.26	-1.42	-1.26	-0.65	0	-1.08	-0.41	0.19	-0.1	-0.37	-0.78	-0.46	0.51	0.1125	0.595	0.67	0.790645	0.158551	0.119035	0.999971	1	0.78268
Clasrp	Q8CFC7	0.56	-2	-1.41	1.36	-1.46	-2.38	-1.05	0.11	-1.62	-0.11	0.32	-0.17	-1.79	-1.78	0.29	0.16	-0.8225	-0.0225	-0.4075	0.346554	0.977946	0.646518	0.999971	1	0.933613
Clcc1	Q99LI2	0.09	-1	-0.32	-0.19	-0.82	-0.71	-0.01	0.2	-0.75	-0.64	-0.02	-0.04	-0.22	-1.13	-0.25	-0.1	0.02	-0.0075	-0.07	0.952966	0.980491	0.832676	0.999971	1	0.979036
Clcn2	A0A338P673	-0.84	0.07	-0.05	-0.69	0.04	-0.83	-0.61	0.06	-0.28	-0.89	-0.78	-0.62	-0.13	-0.78	-0.51	0.57	0.0425	-0.265	0.165	0.895079	0.353476	0.650609	0.999971	1	0.933842
Clcn3	Q8K4W8	-0.57	-0.45	-0.75	-0.55	-0.31	-0.8	-1.45	-0.68	-0.62	-0.28	-0.73	-0.12	-0.49	-1.2	-1.73	-0.13	-0.23	0.1425	-0.3075	0.398109	0.494029	0.398929	0.999971	1	0.871816
Clcn3_1	A0A6Q6Q7B9	-0.1	0	0.06	0.03	0.02	0.53	-0.22	0.06	-0.07	0.03	0.16	-0.06	0.29	0.52	0.29	0.34	0.1	0.0175	0.3625	0.63718	0.914228	0.0548761	0.999971	1	0.725348
Clcn4	Q3LRV6	-0.37	-0.46	-0.77	-0.3	-0.14	-0.36	-0.87	-0.35	-0.5	-0.49	-0.49	-0.28	-0.45	-0.27	-0.23	0.4	0.045	0.035	0.3375	0.842623	0.849208	0.190423	0.999971	1	0.810547
Clcn5	Q9WVD4	-1.83	-0.86	-0.82	-0.71	-0.84	-1.23	-1.08	-0.43	-1.07	-1.36	-1.28	-1.16	-1.73	-1.03	-1.1	-0.29	0.16	-0.1625	0.0175	0.615727	0.567639	0.963266	0.999971	1	0.998721
Clcn6	A2A7F6	-0.65	-0.33	-0.05	-0.39	-0.42	-0.18	-0.47	-0.1	-0.28	-0.48	-0.35	-0.28	-0.14	-0.01	0	0.11	0.0625	0.0075	0.345	0.762105	0.968798	0.106012	0.999971	1	0.78268
Clcn7	F6SUM2	1.93	0.03	0.21	0.07	-0.05	0.32	0.06	0.29	0.39	0.91	-0.11	-0.46	-0.08	-0.62	-0.11	0.12	-0.405	-0.3775	-0.7325	0.36902	0.46552	0.134492	0.999971	1	0.784948
Cldn1	O88551	-1.67	-0.36	1.43	1.32	-0.81	-0.71	0.55	0.45	0.3	-0.91	1.2	1.12	-3.53	-0.06	1.61	1.51	-0.31	0.2475	-0.2975	0.678137	0.758465	0.812689	0.999971	1	0.974458
Cldn10	Q9Z0S6-6	0.07	0.8	-0.28	-0.5	0.64	0.27	-0.3	0.01	1.32	0.06	0.19	-0.11	1.4	-0.15	-0.73	-0.43	0.1325	0.3425	-3.92523e-16	0.700294	0.415163	1	0.999971	1	1
Cldn11	Q60771	0.41	1.19	1.89	1.3	0.98	1.06	1.26	1.13	1.44	0.54	0.4	0.19	-0.66	0.3	0.79	-0.33	-0.09	-0.555	-1.1725	0.774657	0.183925	0.020343	0.999971	1	0.635388
Cldn12	Q9ET43	-0.21	0.27	1.42	0.96	0.29	1.05	0.54	0.89	-0.25	0.52	0.33	-2.8	0.22	0.98	0.75	0.95	0.0825	-1.16	0.115	0.83032	0.157557	0.766951	0.999971	1	0.962472
Cldn3	Q9Z0G9-2	4.31	-4.74	-1.67	-1.57	-4.34	1.7	-1.6	-2.88	3.63	7.98	-6.04	-3.33	-5.46	-2.95	-3.19	-3.2	-0.8625	1.4775	-2.7825	0.671251	0.657094	0.13974	0.999971	1	0.784948
Cldn5	O54942	4.18	0.41	2.13	3.61	2.02	0.92	3.17	0.77	2.34	4.34	1.49	1.71	-0.89	-0.01	1.89	-0.01	-0.8625	-0.1125	-2.3375	0.353143	0.906418	0.0299275	0.999971	1	0.678474
Cldnd1	Q9CQX5	-1.48	-0.99	-1	-1.32	-1	-1.04	-0.97	-1.1	-0.93	-1.27	-0.71	-1.16	-0.54	-1.01	-1.5	-1.05	0.17	0.18	0.1725	0.384582	0.415344	0.506952	0.999971	1	0.905775
Clec16a	Z4YLG3	0.3	0.25	0.29	-0.04	0.09	0.49	0.44	0.18	0.79	0.43	0.17	0.03	0.59	-0.02	-0.04	0.31	0.1	0.155	0.01	0.605307	0.494767	0.963238	0.999971	1	0.998721
Clec2l	P0C7M9	0.23	-0.53	-0.14	0.29	-0.34	0.21	-0.13	0.53	-0.13	0.23	-0.04	-0.45	-0.04	0	0.21	0.34	0.105	-0.06	0.165	0.712076	0.816393	0.50174	0.999971	1	0.904573
Clgn	P52194	2.02	0.5	0.56	0.83	0	0.54	-0.34	0.48	0.93	2.18	1.04	0.95	0.41	0.33	0.71	1.32	-0.8075	0.2975	-0.285	0.0665943	0.505522	0.484803	0.999971	1	0.896611
Clic1	Q9Z1Q5	0.61	0.8	1.43	1.45	0.67	0.7	1	0.93	0.65	0.71	1.11	1.09	0	0.93	1.12	1.33	-0.2475	-0.1825	-0.2275	0.346943	0.499812	0.52885	0.999971	1	0.910069
Clic4	Q9QYB1	-0.21	-0.05	0.25	-0.45	-0.37	-0.01	-0.31	0.21	-0.26	-0.18	-0.13	0.49	-0.19	-0.14	0.27	-0.23	-0.005	0.095	0.0425	0.983007	0.706492	0.851793	0.999971	1	0.98187
Clic5	A0A668KLB7	-0.86	0.64	-2.18	-3.1	0.86	-0.77	-2.62	-2.79	0.63	-1.02	-2.95	-1.24	-0.07	-0.21	-4.19	-2.43	0.045	0.23	-0.35	0.965971	0.815432	0.758834	0.999971	1	0.961116
Clic6	Q8BHB9	1.69	2.82	3.54	2.72	1.58	1.96	2.65	2.9	2.16	0.64	-4.59	2.79	0.61	1.66	2.43	2.44	-0.42	-2.4425	-0.9075	0.369828	0.138499	0.115348	0.999971	1	0.78268
Clint1	Q5SUH7	-2.38	-0.01	-0.42	0	0.59	-0.18	1.52	-1.28	1.6	-0.53	0.48	0.99	-1.78	-1.76	-1.13	-2.86	0.865	1.3375	-1.18	0.261308	0.0699273	0.0813804	0.999971	1	0.755254
Clint1_1	Q5SUH6	0.04	-0.53	0.09	0.14	-0.45	-0.14	-0.06	0.1	-0.28	-0.2	-0.16	0.13	-0.43	0	-0.09	0.28	-0.0725	-0.0625	0.005	0.75471	0.777068	0.98372	0.999971	1	0.99925
Clip1	D3Z3M7	0.44	0.69	-0.07	-0.27	-0.59	-0.13	-0.56	-0.02	-0.27	0.8	0.67	0.74	1.17	-0.3	-0.84	-0.45	-0.5225	0.2875	-0.3025	0.0900359	0.400557	0.517861	0.999971	1	0.905815
Clip1_1	Q922J3	0.84	-0.71	-0.02	0.6	0.11	-0.18	-0.54	-0.76	-0.36	0.29	0.15	1.13	-0.21	0.34	0.37	1.58	-0.52	0.125	0.3425	0.197026	0.776417	0.480878	0.999971	1	0.89485
Clip1_2	D3Z2Z1	0.3	0.43	0.33	0.18	0.31	0.5	0.5	0.18	0.47	0.3	0.47	0.49	0.39	0.27	0.22	0.36	0.0625	0.1225	-7.85046e-17	0.724669	0.462347	1	0.999971	1	1
Clip2	Q9Z0H8	0.04	-0.19	0	0.14	-0.4	-0.28	-0.05	-0.04	-0.07	0.15	0.23	0.24	-0.02	-0.22	0.04	0.32	-0.19	0.14	0.0325	0.319562	0.435456	0.867688	0.999971	1	0.983462
Clip3	B9EHT4	-0.53	-0.02	-0.6	-0.79	0.11	0.15	-0.4	-0.21	0.64	-0.22	-0.2	-0.31	1.26	-0.02	-0.27	-0.07	0.3975	0.4625	0.71	0.127669	0.135074	0.08529	0.999971	1	0.759325
Clip4	A0A2R8VHV0	0.47	0.85	0.66	0.86	0.83	0.99	0.96	1.06	0.55	0.48	0.47	0.8	1.29	1.33	0.93	0.84	0.25	-0.135	0.3875	0.191494	0.47455	0.0896827	0.999971	1	0.771991
Clmn	Q8C5W0-4	0.41	-0.3	-0.7	-0.76	-0.47	-0.13	-0.62	-0.43	-0.46	0.06	-0.73	-0.66	-0.51	-0.37	-0.51	-0.61	-0.075	-0.11	-0.1625	0.801116	0.734785	0.575211	0.999971	1	0.91816
Clmp	Q8R373	0.29	-1.18	-0.21	0.18	-0.77	-0.87	0.21	-0.39	-0.69	0.15	-0.56	-0.62	-0.84	-0.72	-0.52	-0.56	-0.225	-0.2	-0.43	0.573885	0.597167	0.227075	0.999971	1	0.828236
Cln6	D6RE34	-1.46	-0.2	-0.33	0.06	0.52	0.05	-0.97	0.24	-0.06	-0.74	-0.41	0.2	0.57	-0.05	0.48	-0.18	0.4425	0.23	0.6875	0.328742	0.549811	0.0931029	0.999971	1	0.776565
Cln8	Q9QUK3	1.43	0.26	-1.06	-0.97	-0.33	-0.05	-1.26	-0.53	-0.25	0.87	-0.06	0	-0.21	-0.28	-0.09	0.42	-0.4575	0.225	0.045	0.443793	0.702581	0.935852	0.999971	1	0.995618
Clns1a	Q923F1	0.25	0.58	0.19	0.5	0.79	0.31	0.05	0.56	0.28	0.33	0.43	0.62	0.72	0.77	0.6	0.42	0.0475	0.035	0.2475	0.833492	0.850891	0.216224	0.999971	1	0.826893
Clock	A0A0J9YU61	1.46	1.06	0.19	1.71	1.11	1.05	0.3	1.11	0.36	1.78	0.68	0.1	0.46	1.32	0.65	2.13	-0.2125	-0.375	0.035	0.574298	0.430864	0.940738	0.999971	1	0.996218
Clpb	Q60649	-0.19	-0.38	-0.16	-0.16	-0.44	-0.21	-0.4	0.17	-0.58	-0.38	-0.11	0	-0.5	-0.25	-0.02	0.01	0.0025	-0.045	0.0325	0.990217	0.819636	0.867222	0.999971	1	0.983462
Clpp	O88696	-0.41	-0.94	-0.54	-0.09	-0.74	-1.06	-0.85	-0.13	-1.17	-0.75	-0.85	-0.6	-0.79	-0.72	-0.22	-0.23	-0.2	-0.3475	0.005	0.483261	0.176457	0.984558	0.999971	1	0.99925
Clptm1	Q8VBZ3	-0.24	-0.49	-0.38	-0.3	-0.42	-0.33	-0.14	0.08	-0.27	0.06	-0.06	-0.16	-0.18	0.14	-0.27	-0.16	0.15	0.245	0.235	0.439051	0.177844	0.218668	0.999971	1	0.827064
Clptm1l	Q8BXA5	-1.26	-0.67	-0.15	-0.24	-0.93	-0.59	-0.39	0.05	-0.24	-0.93	0.28	0.21	-0.74	-0.35	0.52	0.04	0.115	0.41	0.4475	0.725165	0.281347	0.236739	0.999971	1	0.833594
Clpx	Q9JHS4	-0.4	-0.47	-0.2	-0.67	-0.44	-0.68	-0.36	-0.45	-0.62	-0.35	-0.04	-0.02	-0.41	-0.42	-0.28	-0.62	-0.0475	0.1775	0.0025	0.800987	0.419546	0.989455	0.999971	1	0.99925
Clstn1	Q9EPL2-2	1.92	2.6	1.94	2.19	2.69	2.95	0.94	2.27	2.69	2.72	1.73	0.51	3.22	3.06	2.08	2.28	0.05	-0.25	0.4975	0.91057	0.624091	0.151761	0.999971	1	0.795578
Clstn1_1	Q9EPL2	1.47	1.73	1.41	0.9	1.82	1.85	1.52	1.3	1.89	1.18	1.82	1.59	2.3	1.37	1.4	1.24	0.245	0.2425	0.2	0.334774	0.36057	0.518797	0.999971	1	0.905901
Clstn2	Q9ER65-2	-1.08	0.59	-0.34	-0.23	-0.02	0.54	-0.6	-0.15	0.29	0.36	-0.09	-0.39	-0.58	0.75	-1.06	-0.28	0.2075	0.3075	-0.0275	0.603796	0.418952	0.954178	0.999971	1	0.998056
Clstn3	D3Z601	1.29	0.51	0.56	0.71	0.47	1.13	1	1.16	0.87	1.32	0.86	0.82	0.82	1	0.92	0.92	0.1725	0.2	0.1475	0.51686	0.420408	0.517327	0.999971	1	0.905815
Clta	B1AWD8	-1.47	-0.21	-0.94	-2.74	-0.31	-0.84	-0.73	-0.73	0.1	-1.3	0.37	1.07	0.69	-1.04	-2.22	-2.27	0.6875	1.4	0.13	0.197157	0.0612071	0.869003	0.999971	1	0.983462
Clta_1	B1AWE0	-0.69	-1.08	-2.34	-2.82	-0.65	-0.8	0.1	-2.85	0.02	-1.4	-0.76	-1.81	-0.49	-1.61	-2.46	-3.03	0.6825	0.745	-0.165	0.361805	0.229543	0.808178	0.999971	1	0.973379
Cltb	Q6IRU5-2	-0.44	-0.6	-0.93	0.64	-0.31	-0.91	-0.6	-1.01	-0.25	0.15	-1	-1.1	-0.73	-0.71	-1.44	-1.66	-0.375	-0.2175	-0.8025	0.319124	0.615815	0.0717184	0.999971	1	0.739418
Cltb_1	Q6IRU5	-0.81	-1.2	-2.62	-2.46	-1.4	-1	-2.25	-2.37	-1.6	-1.37	-1.99	-2.49	-1.15	-1.08	-1.98	-2.15	0.0175	-0.09	0.1825	0.972988	0.851477	0.711969	0.999971	1	0.951449
Cltc	Q68FD5	-1.45	-1.07	-0.87	-1.38	-0.98	-0.97	-0.36	-1.09	-1.01	-1.93	-0.76	-0.88	-0.38	-1.01	-0.73	-1.09	0.3425	0.0475	0.39	0.185149	0.876265	0.134541	0.999971	1	0.784948
Clu	Q06890	-1.15	-0.65	-0.15	-0.53	0	-0.02	0.6	-0.64	0.11	-0.5	0.48	0.55	0.04	-0.76	-0.59	0.05	0.605	0.78	0.305	0.0914034	0.0350161	0.328718	0.999971	1	0.856472
Cluh	A0A0R4J140	1.03	1.52	1.14	1.25	1.4	1.47	1.11	1.59	1.44	1.52	1.47	1.55	1.4	1.41	1.27	1.39	0.1575	0.26	0.1325	0.444999	0.173311	0.479884	0.999971	1	0.894438
Clvs1	Q9D4C9	-0.05	0.29	0.2	0.37	0.3	0.37	-0.11	0.22	0.52	0.41	0.24	0.38	0.7	0.47	0.25	0.49	-0.0075	0.185	0.275	0.969909	0.318664	0.180933	0.999971	1	0.808532
Clvs2	Q8BG92	-0.14	0.26	0.27	0.48	0.25	0.06	0.08	0.18	0.12	0.09	0.45	0.47	0.32	0.31	0.39	0.6	-0.075	0.065	0.1875	0.705019	0.758701	0.367797	0.999971	1	0.869526
Clybl	Q8R4N0	-0.47	-0.42	-0.34	-0.28	-0.51	-0.39	-0.88	0.02	-0.61	-0.64	-0.78	-1.02	-0.52	-0.38	-0.35	-0.16	-0.0625	-0.385	0.025	0.785055	0.0547189	0.885944	0.999971	1	0.987222
Cmas	A0A0R4J0B4	1.47	2.26	1.85	2.07	2.19	2.23	2.08	2.46	2.68	1.78	2.25	2.13	2.28	2.75	2.42	2.44	0.3275	0.2975	0.56	0.173944	0.286807	0.0375567	0.999971	1	0.700096
Cmbl	Q8R1G2	-0.28	0.83	1.98	1.11	1.3	0.82	1.94	1.17	1.73	-0.16	1.84	1.36	2.08	0.93	1.87	1.23	0.3975	0.2825	0.6175	0.421666	0.641217	0.237359	0.999971	1	0.833594
Cmc1	Q9CPZ8	-0.84	-0.36	-0.15	0.2	0.12	-0.39	-0.14	-0.13	-0.48	-1.08	-0.33	-0.33	-0.1	-0.51	-0.17	-0.49	0.1525	-0.2675	-0.03	0.565945	0.370876	0.909651	0.999971	1	0.991822
Cmc2	Q8K199	1.36	1.11	1.72	1.43	0.18	0.84	1.23	1.45	0.57	1.26	1.75	1.84	1.04	0.55	1.27	2.14	-0.48	-0.05	-0.155	0.148172	0.875416	0.659611	0.999971	1	0.935181
Cmc4	Q61908	2.22	1.82	2.49	1.73	1.56	3.39	1.96	1.83	1.7	2.4	1.61	-1.89	2.23	2.69	1.51	1.42	0.12	-1.11	-0.1025	0.777075	0.230898	0.767739	0.999971	1	0.962472
Cmip	Q9D486	0.51	0.26	0.58	0.27	0.22	0.24	1.03	0.03	0.68	1.06	0.56	0.36	0.65	0.2	0.36	-0.12	-0.025	0.26	-0.1325	0.923334	0.242901	0.556969	0.999971	1	0.915051
Cmpk1	Q9DBP5	-1.05	-0.17	-0.35	-0.4	0.09	-0.58	0.08	-0.58	0.14	-1.04	-0.04	0.41	-0.2	-0.53	-0.5	-0.45	0.245	0.36	0.0725	0.400549	0.333772	0.763155	0.999971	1	0.961892
Cmpk2	Q3U5Q7	-0.34	-0.3	-1.38	-1.38	-0.5	-0.27	-0.94	-1.7	-0.65	-0.43	-1.41	-1.81	-0.49	-0.35	-1.45	-1.48	-0.0025	-0.225	-0.0925	0.995209	0.5976	0.821968	0.999971	1	0.975833
Cmss1	Q9CZT6	1.88	0.52	0.32	1.18	1.97	0.88	0.32	1.39	0.64	0.68	0.44	1.52	1.73	1.84	1.44	1.08	0.165	-0.155	0.5475	0.72422	0.704888	0.17382	0.999971	1	0.807788
Cmtm4	Q8CJ61	-1.24	-0.27	-0.97	-1.02	-1.08	-0.27	-0.18	-1.02	-0.7	0.06	-0.46	-0.84	-0.93	0.09	-0.36	-0.82	0.2375	0.39	0.37	0.46562	0.211745	0.263089	0.999971	1	0.842533
Cmtm5	Q45TP8	-0.46	-0.4	-0.48	-0.55	-0.71	-0.44	-1.19	-0.16	-1.17	-0.41	-0.84	-0.56	-0.06	-0.5	-0.77	-0.24	-0.1525	-0.2725	0.08	0.545421	0.224766	0.704043	0.999971	1	0.950051
Cmtr1	Q9DBC3	2.24	2.57	2.22	2.43	2.25	2.13	1.73	1.86	2.25	1.95	2.11	2.33	1.4	1.8	2.12	2.08	-0.3725	-0.205	-0.515	0.092567	0.284309	0.0461027	0.999971	1	0.710102
Cnbp	P53996-3	1.61	3.69	3.52	0.99	2.38	2.78	5.34	1.33	3.17	2.6	1.25	-3.35	0.92	0.63	0.94	0	0.505	-1.535	-1.83	0.605866	0.306997	0.0189858	0.999971	1	0.635388
Cndp2	Q9D1A2	0.06	0.52	-0.54	-0.58	0.21	0.45	-0.36	-0.02	0.27	0.14	-0.56	-0.33	0.21	0.31	-0.28	-0.16	0.205	0.015	0.155	0.523252	0.963409	0.615124	0.999971	1	0.927914
Cnep1r1	D3Z6J3	-0.3	-0.15	-0.66	0.1	0.43	0.62	-0.4	0.01	-0.45	-0.38	-0.22	-0.59	0.53	0.35	0.04	0.43	0.4175	-0.1575	0.59	0.173777	0.477079	0.028571	0.999971	1	0.678474
Cnih1	D6RGU4	0.64	0.93	1.61	1.22	0.72	1.26	0.07	0.68	0.94	-0.36	-1.05	-2.22	0.9	1.86	1.95	0.39	-0.4175	-1.7725	0.175	0.215743	0.0199754	0.672197	0.999971	1	0.939777
Cnih2	A0A494B9S6	-7.39	-16.45	-11.97	-12.88	-14.13	-14.92	-13.55	-13.36	-21.45	-6.32	-8.66	-12.41	-21.04	-10.22	-8.81	-11.8	-1.8175	-0.0375	-0.795	0.295559	0.99117	0.78741	0.999971	1	0.96724
Cnih3	G3XA11	1.63	0.05	-0.67	0.07	0.17	-0.03	-0.39	0.87	0.28	0.93	-1	-0.78	1.11	0.31	-1.6	-0.02	-0.115	-0.4125	-0.32	0.822053	0.504024	0.638862	0.999971	1	0.93301
Cnih4	A0A0A6YW87	-1.05	-0.34	-0.85	-0.84	-1.07	-1.29	-1.21	-0.38	-0.93	-1.1	-1.06	-0.33	-0.71	-0.29	-1.22	-0.85	-0.2175	-0.085	0.0025	0.436406	0.741446	0.992502	0.999971	1	0.99925
Cnksr2	Q80YA9	-0.82	-0.69	-0.6	-0.8	-0.74	-0.66	-0.81	-0.68	-0.34	-0.4	-0.08	-0.08	0.07	-0.41	-0.18	0.13	0.005	0.5025	0.63	0.9759	0.0179608	0.0102674	0.999971	1	0.613095
Cnn1	Q08091	-0.86	-2.82	-4.69	-2.25	6.53	3.53	-1.62	-3.29	0.79	5.51	5.86	7.5	-4.02	-0.67	-2.93	-2.77	3.9425	7.57	0.0575	0.091042	0.000688708	0.951538	0.999971	0.448349	0.998056
Cnn2	Q08093	0.82	0.97	1.66	2.35	4.55	3.19	1.45	0.94	2.12	3.52	2.73	2.69	0.6	2	1.7	2.13	1.0825	1.315	0.1575	0.202715	0.0133465	0.734551	0.999971	1	0.957874
Cnn3	Q9DAW9	1.35	0.38	0.5	0.38	0.79	0.9	0.15	-0.84	0.81	1.6	0.45	0.94	0.48	0.6	0.53	0.83	-0.4025	0.2975	-0.0425	0.368275	0.383854	0.873878	0.999971	1	0.984109
Cnnm1	A0A286YDL2	-0.35	-0.55	-0.96	-1.02	-0.58	-0.79	-1.24	-1.11	-0.44	-0.39	-0.67	-0.61	0	-0.62	-0.79	-0.89	-0.21	0.1925	0.145	0.40876	0.386341	0.600894	0.999971	1	0.92426
Cnnm2	Q3TWN3	-0.53	-1.04	-1.8	-1.67	-0.91	-0.9	-1.92	-1.65	-0.73	-0.53	-1.77	-1.31	-0.42	-0.8	-1.83	-1.48	-0.085	0.175	0.1275	0.822724	0.657228	0.758559	0.999971	1	0.961116
Cnnm3	Q32NY4	-0.81	-0.77	-0.97	-0.75	-0.47	-0.84	-0.88	-0.65	-0.41	-0.76	-1.03	-0.93	0.31	-0.73	-0.73	-0.36	0.115	0.0425	0.4475	0.533403	0.831098	0.124807	0.999971	1	0.78268
Cnnm4	Q69ZF7	-1.64	-0.96	-1.58	-2.37	-0.88	-1.13	-1.77	-1.94	-0.81	-0.98	-0.98	-0.92	-0.26	-0.69	-1.56	-1.46	0.2075	0.715	0.645	0.580184	0.0383407	0.138963	0.999971	1	0.784948
Cnot1	Q6ZQ08	0.67	0.89	0.61	0.62	0.82	0.96	0.32	0.61	0.75	0.84	0.61	0.51	0.74	0.99	0.77	0.91	-0.02	-0.02	0.155	0.922894	0.909215	0.387873	0.999971	1	0.871816
Cnot10	Q8BH15-2	-0.51	0.59	-0.73	-0.58	1.44	0.58	0.77	-1.53	2.43	-0.92	0.02	1.57	0.03	-1.04	-0.37	-1.94	0.6225	1.0825	-0.5225	0.347313	0.167602	0.302553	0.999971	1	0.847402
Cnot10_1	Q8BH15	0.52	1.19	1.16	1.19	1.27	1.08	1.04	1.07	1.22	0.75	1.27	1.15	1.04	0.8	1.1	1.43	0.1	0.0825	0.0775	0.648699	0.726931	0.749869	0.999971	1	0.961064
Cnot11	Q9CWN7	0.43	0.32	0.45	0.56	0.1	-0.03	-0.11	0.59	0.25	0.19	0.27	0.7	-1.04	0.12	0.51	0.69	-0.3025	-0.0875	-0.37	0.179707	0.645907	0.342745	0.999971	1	0.861474
Cnot2	Q8C5L3-2	0.78	0.95	1.64	0.74	0.29	1.07	2.14	0.34	0.77	0.71	0.96	1.07	0.75	0.17	0.77	0.19	-0.0675	-0.15	-0.5575	0.880819	0.55366	0.0755923	0.999971	1	0.746958
Cnot3	Q8K0V4	0.32	0.82	0.88	0.97	0.82	0.86	0.64	0.86	0.76	0.73	1.19	1.22	0.67	0.87	0.84	0.74	0.0475	0.2275	0.0325	0.818996	0.339864	0.875175	0.999971	1	0.984491
Cnot4	Q05BG1	0.24	0.92	0.75	0.93	0.33	0.32	0.72	0.72	0.1	-0.32	1	0.82	0.16	0.72	0.99	1.43	-0.1875	-0.31	0.115	0.431614	0.379344	0.716353	0.999971	1	0.952576
Cnot6l	Q8VEG6-2	-0.94	1.26	1.44	0.49	1.96	1.29	0.37	0.34	2.03	-0.94	0.09	-0.25	3.35	-0.33	0.44	0.17	0.4275	-0.33	0.345	0.488851	0.664786	0.69885	0.999971	1	0.947812
Cnot7	Q60809	0.2	0.54	1	0.82	0.49	0.55	0.65	0.43	0.39	0.62	0.26	0.84	0.35	0.91	1.25	1.3	-0.11	-0.1125	0.3125	0.623974	0.647434	0.300466	0.999971	1	0.847402
Cnot9	Q9JKY0	0.07	0.52	0.48	0.61	0.35	0.62	0.01	0.42	0.35	0.48	0.37	0.31	0.36	1	0.4	0.97	-0.07	-0.0425	0.2625	0.749865	0.821649	0.297999	0.999971	1	0.847402
Cnp	P16330	-1.41	-1.65	-0.89	-1.32	-2.11	-1.5	-1.89	-1.02	-1.85	-1.53	-1.82	-1.66	-1.69	-1.23	-0.95	-1.27	-0.3125	-0.3975	0.0325	0.307713	0.0949047	0.896237	0.999971	1	0.988571
Cnpy2	Q9QXT0	0.72	0.32	0.91	1.09	0.12	0.47	0.89	1.24	0.4	0.65	0.69	0.41	0.56	0.73	1.12	1.17	-0.08	-0.2225	0.135	0.791542	0.329838	0.593262	0.999971	1	0.923349
Cnpy3	Q9DAU1	0.46	1.71	1.11	1.04	0.82	1.34	0.97	1.09	1.14	1.15	1.43	0.86	0.63	1.27	1	1.06	-0.025	0.065	-0.09	0.931249	0.82347	0.76316	0.999971	1	0.961892
Cnpy4	Q8BQ47	-0.6	-0.84	-1.33	-1.77	-0.5	-1.64	-1.5	-0.42	-0.85	-1.49	-0.7	-0.02	-0.4	-0.91	-0.78	-0.85	0.12	0.37	0.4	0.762602	0.349595	0.198923	0.999971	1	0.813335
Cnr1	P47746	-0.69	-1.46	-0.79	-0.77	-1.46	-1.43	-0.91	-0.87	-1.58	-0.71	-1.21	-1.3	-1.78	-1.2	-1.14	-0.53	-0.24	-0.2725	-0.235	0.372515	0.330395	0.464404	0.999971	1	0.890905
Cnrip1	Q5M8N0	-0.36	-0.07	0.02	0.21	-0.22	0.18	0.08	-0.05	0.25	-0.67	0.2	0.23	0.09	-0.1	0.11	0.17	0.0475	0.0525	0.1175	0.814969	0.846521	0.552251	0.999971	1	0.913595
Cnst	Q8CBC4	0.4	0.37	0.38	0.67	0.44	0.02	0.91	0.51	0.4	0.08	0.27	0.48	0.45	0.2	0.05	0.3	0.015	-0.1475	-0.205	0.948531	0.427584	0.285125	0.999971	1	0.845133
Cntfr	O88507	-0.18	-1.67	-0.65	-0.32	-1.35	-1.37	-0.44	-0.06	-1.09	-0.94	-0.86	-0.65	-1.05	-1.38	-0.35	-0.57	-0.1	-0.18	-0.1325	0.821546	0.603732	0.73671	0.999971	1	0.959447
Cntn1	P12960	-0.66	-1.09	-0.77	-0.69	-0.89	-1	-0.46	-0.59	-0.8	-0.88	-0.74	-0.56	-0.66	-0.86	-0.69	-0.48	0.0675	0.0575	0.13	0.748908	0.75726	0.504588	0.999971	1	0.905277
Cntn2	Q61330	-1.34	-0.96	-0.77	-0.95	-1.41	-0.93	-1.07	-0.99	-1.21	-1.39	-1	-0.82	-0.75	-0.94	-0.66	-0.69	-0.095	-0.1	0.245	0.65406	0.6447	0.234911	0.999971	1	0.832918
Cntn3	Q07409	-0.91	-1.16	-1	-1.2	-0.94	-0.87	-0.77	-0.48	-0.71	-0.66	-0.42	-0.62	-0.54	-1	-0.52	-1.19	0.3025	0.465	0.255	0.137262	0.0237922	0.272353	0.999971	1	0.843794
Cntn4	Q69Z26	-0.39	-1.08	-1.09	-0.56	-0.67	-0.97	-1.08	-0.78	-1.01	-0.28	-0.86	-1.05	-0.54	-1.04	-0.49	-0.44	-0.095	-0.02	0.1525	0.688995	0.941001	0.552411	0.999971	1	0.913595
Cntn5	P68500	0.15	-1.61	-1.22	-1.1	-0.88	-0.78	-0.68	-1.05	-0.63	0.12	-0.8	-0.5	-1.15	-1.33	-0.82	-1.16	0.0975	0.4925	-0.17	0.795654	0.250714	0.658184	0.999971	1	0.934638
Cntn6	Q9JMB8	-0.63	-0.77	-1.29	-0.99	-0.7	-1.02	-1.48	-1	-0.73	-0.74	-0.93	-0.89	-0.26	-0.69	-1.04	-0.66	-0.13	0.0975	0.2575	0.599686	0.634216	0.310148	0.999971	1	0.847402
Cntnap1	O54991	-0.41	-0.72	-0.26	-0.47	-0.93	-0.61	-0.77	-0.24	-0.74	-0.65	-0.76	-0.98	-0.76	-0.52	-0.29	-0.64	-0.1725	-0.3175	-0.0875	0.441199	0.113778	0.661879	0.999971	1	0.936148
Cntnap2	E9QNF7	-0.04	-0.57	-0.86	-0.82	-0.59	-0.33	-0.41	-0.85	-0.63	-0.4	-1.06	-0.94	0.01	-0.8	-0.71	-0.76	0.0275	-0.185	0.0075	0.912137	0.48619	0.978936	0.999971	1	0.99925
Cntnap3	E9PY62	0.97	-1.52	-0.45	-0.96	-0.61	-0.68	-0.04	-0.65	-0.38	0.75	0.16	0.65	-1.04	-1.02	-0.47	-0.86	-0.005	0.785	-0.3575	0.992214	0.177133	0.489154	0.999971	1	0.898346
Cntnap4	D3YWB9	-0.53	-0.66	-0.54	-0.09	-0.69	-0.67	-0.54	-0.27	-0.8	-0.39	-0.56	-0.73	-0.76	-0.61	-0.43	-0.02	-0.0875	-0.165	1.07944e-16	0.677291	0.429968	1	0.999971	1	1
Cntnap5a	Q0V8T9	-0.44	-0.15	-0.66	-0.67	0.21	-0.1	-0.31	-0.36	0.3	-0.14	-0.48	-0.38	0.43	-0.23	-0.39	-0.58	0.34	0.305	0.2875	0.150195	0.228322	0.30461	0.999971	1	0.847402
Cntnap5b	Q0V8T8	-0.79	-1.51	-0.87	-0.51	-1.07	-1.29	-0.7	-0.25	-1.37	-0.89	-0.17	-0.17	-0.26	-0.89	0.06	-0.44	0.0925	0.27	0.5375	0.769016	0.454545	0.0998408	0.999971	1	0.78268
Cntnap5c	Q0V8T7	0.06	-0.87	-1.27	-1.84	-0.29	-0.57	-1.24	-1.28	-0.2	-0.52	-1.09	-1.33	-0.47	-1.84	-1.09	-1.99	0.135	0.195	-0.3675	0.760432	0.665657	0.465577	0.999971	1	0.891255
Coa3	Q9D2R6	-0.87	-0.05	-0.47	-0.24	-0.16	0.05	-0.8	-0.19	0.2	-0.17	-0.6	-0.27	0.41	0.05	-0.17	0.17	0.1325	0.1975	0.5225	0.629007	0.458733	0.0579809	0.999971	1	0.725348
COA4	Q8BT51	1.24	1.84	-0.96	-1.34	1.48	1.94	-1.14	-0.16	1.83	2.25	-1.16	-1.05	0.75	1.28	-0.9	-1.09	0.335	0.2725	-0.185	0.725787	0.801542	0.834484	0.999971	1	0.979036
Coa6	Q8BGD8	-0.45	1.71	1.55	0.82	1.58	1.21	1.56	1.24	2.07	-0.54	1.75	1.35	1.98	0.07	1.28	0.94	0.49	0.25	0.16	0.311547	0.720183	0.782734	0.999971	1	0.965859
Coa7	Q921H9	0.1	0.54	0.35	-0.12	0.7	0.98	0.91	0.27	1.09	0.16	0.69	0.45	1.07	0.7	0.06	-0.26	0.4975	0.38	0.175	0.0685786	0.17477	0.602332	0.999971	1	0.924453
Coa8	E9Q6C3	-0.39	-0.97	0.02	-0.54	-0.04	-0.59	-0.84	-0.05	-1.12	-0.43	-0.36	0.41	0.12	-0.35	0.45	0.97	0.09	0.095	0.7675	0.761383	0.794614	0.0483549	0.999971	1	0.710102
Coasy	Q9DBL7	-1.87	-0.76	-1.28	-1.75	-0.6	-0.68	-0.47	-1.44	-0.21	-2.02	-0.82	-1.22	-0.48	-1.12	-1.57	-1.67	0.6175	0.3475	0.205	0.0906476	0.430197	0.574973	0.999971	1	0.91816
Cobl	G5E8P4	0.42	0.13	0.34	0.56	-0.03	0.39	0.66	0.5	-0.26	0.3	0.55	-0.17	0.05	0.04	0.01	0.18	0.0175	-0.2575	-0.2925	0.93595	0.303129	0.129444	0.999971	1	0.784948
Cobll1	B1AZ15	2.03	0.72	1.64	1.81	1.88	1.41	1.91	1.26	1.23	2.17	0.95	2.12	1.01	1.5	1.54	1.24	0.065	0.0675	-0.2275	0.844226	0.867596	0.479875	0.999971	1	0.894438
Coch	Q62507	-0.36	0.73	0.4	0.16	1.16	0.39	0.28	0.13	2.06	0.22	1.06	1.17	2.54	0.89	1.55	1.63	0.2575	0.895	1.42	0.43696	0.0584009	0.00559071	0.999971	1	0.582714
Cog1	Q9Z160	1.33	1.43	1.09	1.03	1.58	1.24	1.13	1.48	1.34	1.61	1.4	1.36	0.77	1.88	1.06	1.65	0.1375	0.2075	0.12	0.497093	0.274156	0.677736	0.999971	1	0.942594
Cog2	Q921L5	0.2	2.48	1.45	1.22	1.98	2.51	1.35	1.49	2.43	0.84	1.49	1.31	1.98	2.58	1.51	1.62	0.495	0.18	0.585	0.334003	0.735915	0.252016	0.999971	1	0.839012
Cog3	E9QL65	1.36	1.75	0.79	1.07	1.52	1.69	0.66	0.81	1.59	1.85	0.57	0.93	1.49	1.98	0.91	0.96	-0.0725	-0.0075	0.0925	0.824954	0.983	0.777062	0.999971	1	0.964475
Cog4	G3UWH9	0.1	1.12	0.73	0.71	1.1	0.84	0.97	0.85	1.22	0.38	0.55	1	1.49	1.13	0.93	0.95	0.275	0.1225	0.46	0.284794	0.680074	0.113661	0.999971	1	0.78268
Cog5	Q8C0L8	0.47	0.99	0.61	0.79	1.18	0.87	0.63	1.03	0.91	0.55	0.97	1.27	0.85	0.75	0.69	1.02	0.2125	0.21	0.1125	0.330449	0.361114	0.570483	0.999971	1	0.91816
Cog6	A0A0R4J0L5	0.91	1.47	1.21	1.28	1.17	1.24	1.05	1.51	1.2	1.48	1.33	1.63	0.74	1.53	1.4	1.69	0.025	0.1925	0.1225	0.903153	0.352245	0.642396	0.999971	1	0.93301
Cog7	A0A0R4J0Q9	-0.07	0.75	1.01	0.62	0.41	0.75	0.69	1.17	0.37	0.06	0.67	0.87	0.69	0.87	1.15	0.93	0.1775	-0.085	0.3325	0.545499	0.776313	0.23797	0.999971	1	0.833594
Cog8	Q9JJA2	2.3	1.29	0.88	0.5	1.82	1.89	0.57	0.79	1.48	2.57	0.71	0.53	1.6	2.09	0.83	0.96	0.025	0.08	0.1275	0.958547	0.885963	0.78026	0.999971	1	0.965859
Coil	Q5SU73	-1.17	-1.91	-2.27	-1.94	-2.31	-2.47	-1.81	-2.7	-2.24	-1.37	-1.99	-2.92	-2.78	-2.05	-2.19	-2.06	-0.5	-0.3075	-0.4475	0.128833	0.430451	0.160172	0.999971	1	0.800144
Col12a1	E9PX70	0.61	0.82	0.39	2.26	2.97	0.94	0.3	0.48	1.46	1.38	1.65	2.42	0.17	2.28	2.83	2.19	0.1525	0.7075	0.8475	0.821354	0.147686	0.217423	0.999971	1	0.826893
Col18a1	E9QPX1	-0.31	0.18	0.81	0.8	4.72	0.95	1.08	-0.24	2	1.47	2.93	4.52	-0.35	0.46	1.28	0.41	1.2575	2.36	0.08	0.224173	0.00591542	0.845077	0.999971	1	0.979814
Col19a1	F8WHV4	-0.02	-0.53	0.33	-0.07	-0.62	0.32	0.12	-0.36	-0.84	0.35	0.3	0.52	-0.71	-0.52	-0.13	0.37	-0.0625	0.155	-0.175	0.829652	0.660806	0.569235	0.999971	1	0.91816
Col1a1	P11087	4.27	0.88	3.26	3.39	5.9	2.9	5.53	-0.98	2.23	5.35	2.1	4.69	-3.37	1.77	2.71	-1.85	0.3875	0.6425	-3.135	0.802177	0.523547	0.0537323	0.999971	1	0.725348
Col1a2	Q01149	1.27	0.54	1.01	0.58	5.13	1.86	4.45	-1.79	2.06	2.98	1.08	2.88	-1.11	1.46	0.62	-1.85	1.5625	1.4	-1.07	0.281547	0.0119356	0.156638	0.999971	1	0.796008
Col25a1	V9GWX5	6.71	0.87	1.72	2.32	0.91	1.78	3.48	1.14	1.11	4.18	0.43	0.49	-0.83	-0.95	0.75	0.79	-1.0775	-1.3525	-2.965	0.40492	0.350723	0.0376395	0.999971	1	0.700096
Col3a1	P08121	3.77	1.01	3.06	3.71	6.13	2.24	3.59	-0.29	2.85	5.26	6.47	8.76	-2.76	1.43	3.63	-1.64	0.03	2.9475	-2.7225	0.981842	0.0400016	0.0813884	0.999971	1	0.755254
Col4a1	P02463	1.16	0.55	0.33	1.25	3.3	0.9	0.26	-0.01	1.56	2.21	0.95	1.83	0.73	0.37	0.6	0.03	0.29	0.815	-0.39	0.68445	0.0397363	0.197381	0.999971	1	0.812891
Col4a2	P08122	1.74	0.24	1	0.9	2.52	1.13	1.46	0.28	1.05	2.21	1.05	1.77	-0.2	0.8	1.26	-0.01	0.3775	0.55	-0.5075	0.469418	0.195063	0.262403	0.999971	1	0.842262
Col4a5	Q63ZW6	2.73	4.73	0.74	0.02	3.6	4.25	5.41	0.48	4.98	4.34	0.96	6.4	5.42	4.91	2.94	-0.56	1.38	2.115	1.1225	0.31344	0.157138	0.469417	0.999971	1	0.892481
Col6a1	Q04857	1.04	1.26	1.02	2.54	5.07	1.48	0.85	-0.01	1.76	3.17	2.54	4.29	-1.09	2.4	2.24	0.45	0.3825	1.475	-0.465	0.715531	0.0329925	0.56984	0.999971	1	0.91816
Col6a2	Q02788	0.91	1.13	0.71	2.08	5.42	2.08	0.6	-0.61	2.52	2.88	2.36	3.84	-0.7	1.97	1.83	0.25	0.665	1.6925	-0.37	0.579653	0.00337743	0.571213	0.999971	0.957868	0.91816
Col6a3	J3QQ16	1.05	0.98	0.5	1.69	5.27	1.63	0.57	-0.93	1.93	3.37	2.24	3.89	-1.02	2.31	1.61	-0.28	0.58	1.8025	-0.4	0.629237	0.00507559	0.591645	0.999971	1	0.922655
Colec12	A0A452J8C7	1.08	0.29	0.59	0.87	1.15	0.17	0.59	0.91	0.32	0.6	0.47	1.13	-0.53	0.7	1.02	0.89	-0.0025	-0.0775	-0.1875	0.993018	0.770695	0.625863	0.999971	1	0.930479
Colgalt1	Q8K297	0.9	0.17	-0.17	0.18	0.46	0.54	-0.29	0.23	0.01	1.02	-0.18	0.32	-0.24	0.52	0.02	0.7	-0.035	0.0225	-0.02	0.907318	0.947572	0.949662	0.999971	1	0.998038
Commd1	Q8VI86	-0.33	-0.35	-1.15	-0.61	-0.4	-0.07	-1.34	-0.92	0.02	0.16	-0.68	-0.59	0.49	0.09	-1.08	-1.66	-0.0725	0.3375	0.07	0.829557	0.270387	0.888102	0.999971	1	0.987485
Commd10	Q8JZY2	-0.64	0.89	0.48	0.44	0.71	0.35	0.16	0.38	0.78	-0.05	0.33	0.18	1.01	0.82	0.66	1.06	0.1075	0.0175	0.595	0.753932	0.961431	0.105567	0.999971	1	0.78268
Commd2	Q8BXC6	-0.27	-0.37	-1.44	-0.88	-0.27	-0.27	-0.6	-0.89	-0.47	-0.08	-1.44	-1	-0.3	0.24	-1.18	-0.58	0.2325	-0.0075	0.285	0.463501	0.984524	0.466866	0.999971	1	0.891477
Commd3	Q63829	-0.19	0.02	-0.1	0.42	0.2	-0.04	-0.37	0.39	-0.1	0.04	0.15	0.05	0.25	0.59	-0.11	0.71	0.0075	-0.0025	0.3225	0.975377	0.989949	0.227031	0.999971	1	0.828236
Commd4	Q9CQ02	0.54	1.26	1.45	1.02	1.03	1.37	1.1	1.08	1.23	0.12	1.81	1.3	1.75	1.68	2.15	1.76	0.0775	0.0475	0.7675	0.749785	0.903346	0.013108	0.999971	1	0.613095
Commd5	A0A0R4J0U7	0.48	0.16	-0.03	-0.14	-0.15	0.13	-0.4	0.07	-0.13	0.08	0.07	-0.26	-0.09	0.14	0.01	0.24	-0.205	-0.1775	-0.0425	0.370452	0.401974	0.837773	0.999971	1	0.979416
Commd6	Q3V4B5	-0.18	-0.13	-0.18	0.01	-0.14	-0.14	-0.18	-0.11	-0.29	-0.61	-0.08	-0.07	-0.33	0.35	0.16	0.35	-0.0225	-0.1425	0.2525	0.889533	0.467881	0.259142	0.999971	1	0.839012
Commd7	Q8BG94	0.56	0.46	0.51	1.01	0.55	0.99	0.04	0.86	0.72	1.28	0.46	0.56	1.1	1.08	0.56	1.29	-0.025	0.12	0.3725	0.925309	0.631793	0.141951	0.999971	1	0.784967
Commd8	Q9CZG3	0.12	0.4	-0.35	-0.18	0.6	0.33	-0.48	-0.13	0.2	0.26	-0.31	-0.03	0.85	0.6	0.09	0.11	0.0825	0.0325	0.415	0.783572	0.892371	0.150658	0.999971	1	0.793248
Commd9	Q8K2Q0	-1.77	0.03	0.08	-0.29	0.53	-0.45	0.14	-0.38	0.51	-1.6	0.41	0.13	0.82	-0.56	0.32	-0.24	0.4475	0.35	0.5725	0.345196	0.566196	0.2655	0.999971	1	0.842677
Comt	O88587	-0.67	0.5	-0.75	-1.18	0.52	0.51	-0.48	-0.78	0.49	-0.49	-0.43	-0.63	0.7	0.72	-0.36	-0.77	0.4675	0.26	0.5975	0.324767	0.54008	0.239194	0.999971	1	0.833594
Comtd1	Q8BIG7	1.31	0.44	-0.1	0.24	0.57	0.92	0.69	0.14	0.67	1.28	-0.16	-0.13	0.98	0.67	0.33	0.19	0.1075	-0.0575	0.07	0.751658	0.894666	0.839259	0.999971	1	0.979728
Copa	F8WHL2	0.79	1.27	1.88	1.69	1.26	0.92	1.76	1.89	1.39	0.97	1.87	1.87	1.31	1.2	1.91	2.06	0.05	0.1175	0.2125	0.879427	0.718836	0.51814	0.999971	1	0.905815
Copb1	Q9JIF7	-0.19	0.34	0.62	0.81	0.06	0.4	0.79	0.69	0.21	0.17	0.58	0.57	-0.53	0.59	0.76	1.04	0.09	-0.0125	0.07	0.753338	0.962254	0.858202	0.999971	1	0.982702
Copb2	O55029	0.75	1.57	1.31	1.04	1.53	1.5	1.32	1.21	1.68	1.07	1.3	0.96	1.3	1.52	1.39	1.14	0.2225	0.085	0.17	0.346464	0.743713	0.470056	0.999971	1	0.892481
Cope	O89079	1.17	2.23	1.75	1.6	1.47	2.59	1.16	1.8	1.68	1.96	1.77	1.73	1.48	2.49	1.64	2.22	0.0675	0.0975	0.27	0.853971	0.69986	0.415517	0.999971	1	0.876885
Copg1	Q9QZE5	1.1	1.79	2.13	1.39	1.52	1.61	1.74	1.65	1.89	1.37	1.95	1.54	1.55	1.81	2.15	1.91	0.0275	0.085	0.2525	0.91427	0.761469	0.371357	0.999971	1	0.869526
Copg2	Q9QXK3-4	-0.36	1.2	1.11	0.53	1.46	0.38	1.81	0.85	1.11	-0.6	1.52	1.26	1.24	0.35	1.02	0.5	0.505	0.2025	0.1575	0.279325	0.715891	0.694089	0.999971	1	0.947174
Coprs	Q9CQ13	-1.28	-0.4	-0.9	0.18	0.07	-0.51	0.05	0.52	-0.42	-1.23	0.16	0.4	-0.47	-0.33	0.01	-0.79	0.6325	0.3275	0.205	0.113877	0.476841	0.563536	0.999971	1	0.917087
Cops2	P61202-2	-0.46	0.33	-0.25	-0.81	0.68	-0.03	0.1	-0.54	0.75	-0.62	0.12	0.33	0.87	-0.24	-0.24	-0.78	0.35	0.4425	0.2	0.321126	0.244595	0.622005	0.999971	1	0.929641
Cops3	O88543	-0.06	0.18	1.04	0.57	-0.07	0.32	0.77	0.56	0.17	0.06	0.5	-0.16	-0.19	0.08	0.76	0.45	-0.0375	-0.29	-0.1575	0.902648	0.329066	0.625817	0.999971	1	0.930479
Cops4	O88544	-0.41	0.25	0.14	0	0.22	0.12	0.05	-0.13	0.26	-0.23	0.11	0.11	-0.15	0.05	0.01	-0.16	0.07	0.0675	-0.0575	0.741399	0.758298	0.782168	0.999971	1	0.965859
Cops5	O35864	0.03	0	-0.61	-0.62	-0.05	-0.24	-0.31	-0.66	0.02	-0.5	-0.74	-0.69	-0.39	-0.19	-0.62	-0.64	-0.015	-0.1775	-0.16	0.952124	0.515492	0.515564	0.999971	1	0.905815
Cops6	O88545	-0.41	-0.19	-0.88	-1.06	0	-0.03	-0.78	-1.08	0.05	-0.18	-1.24	-0.9	-0.2	0.22	-1.01	-1.02	0.1625	0.0675	0.1325	0.630563	0.849604	0.714062	0.999971	1	0.952257
Cops7a	Q9CZ04-2	0.84	0.78	0.35	0.2	0.63	0.74	0.28	0.23	0.74	0.41	0.51	0.37	0.86	0.55	0.07	0.33	-0.0725	-0.035	-0.09	0.759915	0.87317	0.726215	0.999971	1	0.956041
Cops7b	Q8BV13	0.31	0.34	0.53	0.46	0.62	0.52	0.95	0.46	0.85	0.46	0.87	0.95	0.81	0	0.74	0.62	0.2275	0.3725	0.1325	0.24865	0.0722059	0.569426	0.999971	1	0.91816
Cops8	Q8VBV7	0.36	-0.28	-0.12	0.11	0.09	0.08	-0.58	-0.32	0.13	0.56	-0.93	-0.07	-0.41	0.28	-0.23	-0.13	-0.2	-0.095	-0.14	0.423375	0.779863	0.558918	0.999971	1	0.915051
Cops9	Q3U898	2.95	0.22	0.88	0.55	-0.91	1.29	0.28	0.27	-1.72	-1.13	-0.74	-0.09	-0.87	-0.04	-0.86	0.57	-0.9175	-2.07	-1.45	0.205721	0.0103371	0.0477385	0.999971	1	0.710102
Copz1	P61924	-0.78	2.03	1.07	0.32	2.9	0.35	1.37	0.64	3.3	-0.5	1.58	2.38	3.53	-0.23	0.8	0.3	0.655	1.03	0.44	0.388281	0.27365	0.634316	0.999971	1	0.93301
Copz2	Q9JHH9	0.91	1.09	1.7	1.84	0.97	1.01	1.45	1.88	0.87	0.18	1.72	1.53	-0.64	1.92	2.54	2.42	-0.0575	-0.31	0.175	0.855367	0.446234	0.804247	0.999971	1	0.971467
Coq10a	A0A1W2P7G5	1.25	0.62	-0.43	-0.23	0.62	0.6	-0.67	0.08	0.75	1.13	-0.47	-0.25	0.71	0.73	-0.27	-0.2	-0.145	-0.0125	-0.06	0.753846	0.980418	0.893673	0.999971	1	0.98828
Coq2	F7CDY3	0.48	1.02	-1.22	-1.35	0.16	-0.21	-2.26	-0.55	-1.04	0.8	-1.6	-1.48	0.4	1.34	-2.53	-0.53	-0.4475	-0.5625	-0.0625	0.541007	0.455921	0.945452	0.999971	1	0.997427
Coq3	Q8BMS4	-1.2	-1.84	-1.9	-1.66	-1.72	-2.34	-1.17	-1.87	-2.3	-1.48	-2.26	-2.38	-1.86	-2.16	-2.2	-2.11	-0.125	-0.455	-0.4325	0.675905	0.128631	0.076536	0.999971	1	0.748444
Coq4	Q8BGB8	0.67	0	-0.02	0.7	-0.21	0.53	-0.35	0.67	-0.08	0.82	-0.73	0.23	0.15	0.44	0.34	1.18	-0.1775	-0.2775	0.19	0.589825	0.46044	0.542433	0.999971	1	0.911119
Coq5	Q9CXI0	-0.35	-0.54	-0.37	-0.43	-0.44	-0.5	-0.61	-0.14	-0.73	-0.62	0.13	-0.75	-0.53	-0.21	-0.29	-0.25	3.92523e-17	-0.07	0.1025	1	0.773419	0.55912	1	1	0.915051
Coq6	Q8R1S0	-0.57	0.27	-0.18	-0.64	-0.14	-0.21	-0.23	-0.4	-0.69	-0.78	-0.49	-0.91	-0.42	-0.18	-0.61	-1.47	0.035	-0.4375	-0.39	0.886928	0.110218	0.277511	0.999971	1	0.843812
Coq7	P97478	-0.09	0.7	1.28	1.17	-0.36	0.81	0.15	0.48	-0.15	0.4	0.06	0.16	-0.4	0.61	0.95	1.35	-0.495	-0.6475	-0.1375	0.219389	0.0773938	0.76405	0.999971	1	0.962405
Coq8a	Q60936	-1.32	-0.78	-1.28	-1.43	-0.98	-0.74	-1.39	-0.82	-0.93	-1.49	-0.81	-0.93	-0.45	-0.33	-0.89	-0.92	0.22	0.1625	0.555	0.367487	0.504458	0.0442872	0.999971	1	0.704422
Coq8b	Q566J8	-0.3	-0.06	-0.3	-0.63	-0.23	-0.06	-0.09	-0.17	0.02	0.26	0.16	-0.45	0.38	0.22	0.01	-0.23	0.185	0.32	0.4175	0.344482	0.189302	0.0859269	0.999971	1	0.759991
Coq9	Q8K1Z0	-0.42	-0.36	-0.32	-0.16	-0.81	-0.58	-0.22	-0.13	-0.93	-0.8	-0.49	-0.28	-0.69	-0.55	-0.95	-0.89	-0.12	-0.31	-0.455	0.580058	0.15907	0.0329216	0.999971	1	0.685881
Coro1a	O89053	0.36	0.65	0.1	0.37	0.71	0.62	0.64	0.09	0.8	0.46	0.23	-0.04	0.51	0.39	-0.32	-0.16	0.145	-0.0075	-0.265	0.521672	0.975099	0.318724	0.999971	1	0.853893
Coro1a_1	A0A0U1RPY8	-0.02	0.76	1.42	2	-0.5	1.67	0.62	0.97	0.84	0.35	1	0.07	-0.67	1.13	-0.46	1.25	-0.35	-0.475	-0.7275	0.546605	0.313786	0.253351	0.999971	1	0.839012
Coro1b	Q9WUM3	0.18	0.27	-0.12	0.16	0.37	0.59	-0.17	0.25	0.43	0.73	0.16	-0.1	0.29	0.47	0.04	0.2	0.1375	0.1825	0.1275	0.541537	0.438969	0.509908	0.999971	1	0.905815
Coro1c	Q9WUM4	-1.23	-0.83	-0.61	-0.57	-0.34	-0.33	-0.68	-0.31	-0.49	-0.65	-0.45	-0.42	-0.32	-0.57	-0.55	-0.52	0.395	0.3075	0.32	0.0991665	0.164286	0.156962	0.999971	1	0.796966
Coro2a	B1AVH5	0.37	0.07	-0.41	-0.03	-0.04	0.5	-0.46	-0.31	-0.16	0.15	-0.42	-0.56	0.07	0.38	-0.36	-0.05	-0.0775	-0.2475	0.01	0.782775	0.33628	0.968147	0.999971	1	0.998787
Coro2b	Q8BH44	-0.33	-0.35	-0.73	-1.18	-0.79	-0.89	-0.95	-1.05	-0.79	-0.68	-0.97	-1.33	-0.6	-0.63	-1.26	-0.98	-0.2725	-0.295	-0.22	0.274001	0.283183	0.429189	0.999971	1	0.881196
Coro6	Q920M5	0.73	-0.49	1.35	0.59	-0.84	-0.28	1.63	0.2	-1.36	-0.07	1.03	0.47	-0.67	-0.62	0.44	0.11	-0.3675	-0.5275	-0.73	0.541643	0.380352	0.126989	0.999971	1	0.783603
Coro7	Q9D2V7	0.3	0.53	0.18	0.18	0.5	0.29	0.19	0.59	0.33	0.38	0.47	0.38	-0.01	0.46	0.22	0.29	0.095	0.0925	-0.0575	0.620583	0.59166	0.766504	0.999971	1	0.962472
Cotl1	Q9CQI6	0.76	0.81	0.65	0.45	0.52	1.06	0.5	0.57	0.82	0.95	0.39	-0.41	0.62	0.62	0.37	0.66	-0.005	-0.23	-0.1	0.980773	0.477742	0.585866	0.999971	1	0.920413
Cox10	Q8CFY5	0.13	-0.76	-1.66	-2.7	-0.69	-1.74	-0.84	-1.1	-1.35	-1.43	-1.68	-0.98	0.06	-1.34	-1.61	-1.95	0.155	-0.1125	0.0375	0.793982	0.84472	0.955998	0.999971	1	0.998056
Cox11	Q6P8I6	1.23	0.39	0.52	0.1	0.72	0.63	-0.64	0.13	1.26	0.81	-0.46	0.7	1.12	0.69	0.11	0.67	-0.35	0.0175	0.0875	0.368456	0.966513	0.784787	0.999971	1	0.96643
Cox14	Q8BH51	1.74	-0.15	-0.1	-0.04	0.03	-0.28	0.58	-0.04	-0.8	0.45	0.72	0.22	0.15	0.26	1.07	0.57	-0.29	-0.215	0.15	0.535151	0.683965	0.750729	0.999971	1	0.961064
Cox15	Q8BJ03-2	0.2	0.06	-0.58	-0.64	-0.34	0.4	-0.73	0.27	-0.17	0.47	-0.27	-0.59	-0.18	0.9	-0.21	-0.05	0.14	0.1	0.355	0.680486	0.750218	0.310217	0.999971	1	0.847402
Cox17	P56394	0.77	2.3	1.58	1.85	1.78	2.56	1.41	1.75	2.52	1.09	0.78	1.18	2.7	2.83	2.15	1.61	0.25	-0.2325	0.6975	0.523706	0.623678	0.113947	0.999971	1	0.78268
Cox18	Q8VC74	2.2	-0.64	-0.9	0.54	-0.95	2.13	0.27	-0.17	-0.42	1.76	-0.3	-0.52	-2.81	-0.85	-0.31	-1.17	0.02	-0.17	-1.585	0.98148	0.833292	0.0741597	0.999971	1	0.746069
Cox19	Q8K0C8	-0.59	0.69	0.87	0.98	0.91	0.73	0.49	1	0.45	0.52	0.78	0.53	0.31	0.98	0.46	0.59	0.295	0.0825	0.0975	0.43358	0.820049	0.797138	0.999971	1	0.970479
Cox20	Q9D7J4	0.47	-1.46	-1.76	-0.95	-1.68	-1.35	-0.54	-0.11	-1.55	-0.8	-1.9	-1.48	-2.43	-1.09	-1.29	-1.3	0.005	-0.5075	-0.6025	0.992882	0.331469	0.278374	0.999971	1	0.843812
Cox4i1	P19783	-1.33	-1.39	-1.06	-1.17	-1.64	-1.44	-0.8	-0.92	-1.84	-1.9	-0.94	-1.3	-1.9	-1.41	-0.99	-0.94	0.0375	-0.2575	-0.0725	0.87859	0.33928	0.780598	0.999971	1	0.965859
Cox4i1_1	M0QWX7	2.96	3.74	1.57	5.16	-0.7	3.46	1.95	0.44	3.28	4.34	0.21	-1.68	4.54	1.06	-0.61	-1.21	-2.07	-1.82	-2.4125	0.0747597	0.218273	0.096651	0.999971	1	0.78268
Cox4i2	Q91W29	1.65	1.83	-3.05	-2.27	3.23	-0.83	-2.03	-2.61	-1.71	0.01	-2.63	-3.58	-2.16	-1.28	-2.97	-3.58	-0.1	-1.5175	-2.0375	0.950915	0.273716	0.1231	0.999971	1	0.78268
Cox5a	P12787	-0.7	-0.96	-1.49	-0.96	-0.76	-1.75	-1.1	-1.22	-0.99	-2.46	-1.08	-0.66	-0.69	-1.3	-1.27	-1.03	-0.18	-0.27	-0.045	0.524681	0.517073	0.855868	0.999971	1	0.982416
Cox5b-ps	Q9D881	0.18	-1.03	-1.63	-1.29	-1.24	-1.36	-1.28	-1.39	-1.4	-0.68	-1.07	-1.79	-1.46	-1.01	-1.68	-1.24	-0.375	-0.2925	-0.405	0.338962	0.506978	0.327615	0.999971	1	0.856472
Cox6a1	Q9DCW5	-4.54	-2.56	-2.03	-2.11	-2.34	-2.56	-1.81	-2.38	-2.43	-3.91	-2.73	-2.23	-3.06	-1.65	-2.06	-2.47	0.5375	-0.015	0.5	0.34983	0.981238	0.417043	0.999971	1	0.877407
Cox6a2	P43023	0.71	0.31	-3.04	-1.72	-1.34	0.36	-2.22	-3.13	-1.49	0.06	-2.26	-1.39	-2.71	-0.52	-1.34	-2.16	-0.6475	-0.335	-0.7475	0.533203	0.712383	0.414984	0.999971	1	0.876789
Cox6b1	P56391	0.16	-0.11	-0.3	-0.19	-0.07	0.92	0.01	0.24	0.35	0.45	-0.32	-0.79	-0.32	0.53	-0.04	-0.55	0.385	0.0325	0.015	0.172662	0.917113	0.956005	0.999971	1	0.998056
Cox6c	Q9CPQ1	-2.03	-2.42	-1.84	-2.8	-2.47	-2.4	-1.72	-2.7	-2.78	-1.93	-1.53	-1.58	-2.84	-2.19	-2.07	-2.85	-0.05	0.3175	-0.215	0.870283	0.379478	0.487648	0.999971	1	0.897906
Cox7a1	A0A140LIU4	-2.68	-1.25	-1.2	-2.07	-0.93	-0.7	-1.82	-1.65	-0.47	-0.65	-1.39	-0.42	0.28	-1.14	-0.32	-1.07	0.525	1.0675	1.2375	0.235492	0.0251854	0.0232558	0.999971	1	0.66029
Cox7a2	P48771	-2.75	-2.67	-1.47	-2.34	-2.14	-2.28	-1.78	-3.03	-2	-2.08	-2.34	-1.68	-2.11	-3.37	-1.9	-2.33	1.86448e-16	0.2825	-0.12	1	0.393593	0.773936	1	1	0.963877
Cox7a2l	E9PZS8	-2.54	-0.92	-0.41	-0.76	-0.68	-0.53	-0.67	-0.52	-0.7	-1.54	-0.66	-0.55	-0.07	-1.05	-0.56	-0.76	0.5575	0.295	0.5475	0.232501	0.551562	0.27343	0.999971	1	0.843794
Cox7c	P17665	-0.27	0.11	-0.44	-0.17	0.1	-1.43	0.54	-1.14	0.02	-0.35	-1.99	-1.11	0.58	-0.82	-1.47	-0.4	-0.29	-0.665	-0.335	0.531601	0.15281	0.436336	0.999971	1	0.882419
Cp	G3X9T8	-0.04	0.85	0.03	0.99	1.69	0.2	0.8	-0.2	0.74	-0.42	0.2	0.92	0.17	0.39	-0.05	-0.14	0.165	-0.0975	-0.365	0.720451	0.802436	0.247232	0.999971	1	0.839012
Cpd	O89001	0.89	1.54	1.08	0.84	1.57	1.44	1.44	0.71	1.62	1.23	1.36	1.5	1.61	1.48	1.07	0.9	0.2025	0.34	0.1775	0.462633	0.149592	0.495677	0.999971	1	0.901531
Cpe	Q00493	-0.48	0.08	-0.17	-0.28	0.64	0.13	0.03	0.05	0.9	-0.01	-0.1	0	1.46	0	-0.12	-0.08	0.425	0.41	0.5275	0.0869097	0.165127	0.195004	0.999971	1	0.811225
Cpeb2	E9Q969	0.63	0.78	0.1	0.44	0.67	0.78	-0.14	0.51	0.96	1.08	0.35	0.65	0.66	0.97	0.5	1.05	-0.0325	0.2725	0.3075	0.904677	0.287205	0.209323	0.999971	1	0.822138
Cpeb3	A0A0R4J102	-0.37	0.56	0.6	0.58	0.51	0.63	0.38	0.83	0.54	-0.04	0.6	0.62	0.71	0.62	0.74	0.99	0.245	0.0875	0.4225	0.382236	0.766769	0.144542	0.999971	1	0.790933
Cpeb4	Q5SU48	0.55	0.71	0.05	-0.51	0.41	0.43	0.34	-0.81	0.59	0.79	0.04	0	1.09	1.12	-0.35	0.15	-0.1075	0.155	0.3025	0.783959	0.646888	0.488952	0.999971	1	0.898346
Cplx1	P63040	0.56	-0.59	-0.48	-0.49	-0.56	0.37	-0.5	-0.48	-0.67	0.11	-0.9	-0.87	-0.65	-0.09	-0.53	-0.24	-0.0425	-0.3325	-0.1275	0.901939	0.359035	0.679389	0.999971	1	0.942957
Cplx2	P84086	0.14	-0.6	-0.01	0.03	-0.76	-0.7	-0.24	-0.05	-0.85	-0.49	-0.36	-0.31	-0.95	-0.75	-0.28	-0.21	-0.3275	-0.3925	-0.4375	0.233343	0.125772	0.127732	0.999971	1	0.783941
Cplx3	Q8R1B5	-0.03	0.04	-0.35	-0.12	-0.21	0.51	-0.17	-0.15	-0.29	0.2	0.32	-0.26	-0.01	-0.23	-0.57	0.13	0.11	0.1075	-0.055	0.634535	0.62596	0.802576	0.999971	1	0.971467
Cpm	Q80V42	-0.94	-0.96	-0.75	-1.04	-0.93	-1	-1.08	-1.04	-0.94	-0.62	-0.97	-0.9	-0.76	-0.62	-0.38	-0.87	-0.09	0.065	0.265	0.595212	0.714081	0.188129	0.999971	1	0.809025
Cpne1	Q8C166	0.94	-0.9	-1.01	-1.24	-0.73	-0.31	-0.92	-1.28	-0.88	-0.04	-1.21	-0.87	-1.2	-0.56	-1.01	-1.11	-0.2575	-0.1975	-0.4175	0.610442	0.705527	0.401105	0.999971	1	0.871816
Cpne2	P59108	-1.08	-1.86	-1.37	-1.25	-1.58	-1.71	-2.12	-1	-1.36	-1.42	-2.32	-1.34	-1.11	-1.37	-0.89	-1.71	-0.2125	-0.22	0.12	0.478867	0.468323	0.652987	0.999971	1	0.934005
Cpne3	Q8BT60	-1.6	-0.8	-0.67	-1.12	-0.47	-0.64	-0.44	-0.8	-0.35	-1.41	-0.63	-0.69	-0.77	-0.94	-0.68	-1.04	0.46	0.2775	0.19	0.0937666	0.383173	0.456399	0.999971	1	0.887217
Cpne4	Q8BLR2	-0.66	-0.49	-0.46	-0.54	-0.58	-0.14	-0.12	-0.28	-0.45	-0.37	-0.55	-0.52	-0.02	-0.2	-0.36	-0.56	0.2575	0.065	0.2525	0.190478	0.688331	0.208619	0.999971	1	0.822138
Cpne5	E9Q1V2	1.34	0.63	0.7	1.83	0.46	-0.34	0.77	1.41	0.37	1.01	0.76	0.76	0.7	0.26	0.84	1.66	-0.55	-0.4	-0.26	0.227454	0.227342	0.512655	0.999971	1	0.905815
Cpne5_1	Q8JZW4	0.03	0.07	-0.83	-0.47	0.21	-0.28	-0.98	-0.26	-0.06	0.09	-0.97	-0.55	0.54	0.17	-0.34	-0.48	-0.0275	-0.0725	0.2725	0.932821	0.823113	0.406398	0.999971	1	0.874911
Cpne6	Q9Z140	1.68	-0.37	-0.38	-0.92	-0.23	0.02	-0.38	-0.53	-0.03	1.82	-0.5	-0.54	0.42	-0.17	-0.55	-0.72	-0.2825	0.185	-0.2575	0.60285	0.799083	0.655941	0.999971	1	0.934061
Cpne7	Q0VE82	-0.47	-0.61	0.06	-0.28	-0.82	-0.64	-0.44	0.6	-0.44	-0.28	-0.18	-0.29	0.25	-0.24	0.34	0.04	1.96262e-16	0.0275	0.4225	1	0.89312	0.0958705	1	1	0.78268
Cpne8	Q9DC53	-0.4	-1.24	-0.49	-0.45	-1.22	-0.8	-0.59	0.32	-1.04	-0.3	-0.45	-0.48	-0.87	-0.9	-0.27	0.21	0.0725	0.0775	0.1875	0.844625	0.777205	0.575336	0.999971	1	0.91816
Cpne9	A0A0R4J0J1	-0.3	-0.53	-0.6	-1.01	-1.35	-0.79	-1.15	-1.02	-1.1	-0.86	-0.59	-0.85	-0.57	-0.83	-0.97	-0.24	-0.4675	-0.24	-0.0425	0.0661396	0.294054	0.863972	0.999971	1	0.983079
Cpox	P36552	-0.57	-0.77	-0.73	-0.43	-0.82	-0.95	-0.34	-0.6	-0.76	-0.48	-0.31	-0.8	-1.08	-0.71	-0.71	-0.59	-0.0525	0.0375	-0.1475	0.800311	0.848754	0.458007	0.999971	1	0.888332
Cpped1	Q8BFS6	0.19	1.21	1.43	0.56	0.73	0.44	0.49	1.24	0.69	0.38	1.14	0.66	0.63	0.5	1.16	1.54	-0.1225	-0.13	0.11	0.717262	0.692004	0.763752	0.999971	1	0.962238
Cpq	Q9WVJ3	0.93	0.26	-0.04	0.24	0.27	0.14	-0.11	0.01	0.29	0.67	-0.07	0.52	-0.42	0.65	0.23	0.69	-0.27	0.005	-0.06	0.295899	0.985569	0.855745	0.999971	1	0.982398
Cpsf1	Q9EPU4	1.09	1.12	1.22	1.45	1.14	0.96	0.92	1.42	0.91	0.96	1.33	1.12	0.88	1.22	1.34	1.38	-0.11	-0.14	-0.015	0.583854	0.46439	0.940067	0.999971	1	0.995869
Cpsf2	O35218	0.89	2.2	1.89	1.67	1.96	2	1.45	1.66	1.8	1.37	1.89	2.13	2.43	2.16	1.99	2.15	0.105	0.135	0.52	0.737656	0.676888	0.112897	0.999971	1	0.78268
Cpsf3	Q9QXK7	0.85	1.8	1.89	1.94	1.71	1.39	1.25	1.77	1.4	1.29	1.33	1.58	1.71	1.21	1.46	2	-0.09	-0.22	-0.025	0.761974	0.440744	0.936434	0.999971	1	0.995618
Cpsf4	E0CXT7	0	0.35	0.45	0.19	0.9	-0.57	0.62	0.27	0.64	-0.33	0.71	0.95	0.22	-0.68	0.22	0.34	0.0575	0.245	-0.2225	0.862606	0.430488	0.426835	0.999971	1	0.880793
Cpsf6	H3BJ30	2.9	2.6	2.03	3.01	2.38	2.5	2.47	2.3	2.23	3.02	2.07	1.87	1.66	2.76	2.01	2.21	-0.2225	-0.3375	-0.475	0.387016	0.324942	0.163978	0.999971	1	0.800215
Cpsf7	Q8BTV2-2	1.75	3.05	2.25	2.4	3.1	1.97	3.57	2.28	3.02	1.78	2.06	2.13	2.71	2.12	1.72	1.83	0.3675	-0.115	-0.2675	0.402752	0.755813	0.44501	0.999971	1	0.884152
Cpt1a	P97742	-0.21	-0.14	-1.32	-1.22	-0.19	0.06	-1.17	-0.72	-0.08	-0.14	-1.24	-1.42	0.18	-0.15	-1.22	-1.1	0.2175	0.0025	0.15	0.590501	0.995548	0.735554	0.999971	1	0.958637
Cpt1c	Q8BGD5	-0.3	-0.67	-0.14	-0.04	-0.68	-0.74	0.02	0.04	-0.72	-0.38	-0.08	-0.37	-0.51	-0.67	0.01	-0.01	-0.0525	-0.1	-0.0075	0.847493	0.661257	0.976092	0.999971	1	0.99925
Cpt2	P52825	-1.42	-1.08	-0.09	-0.69	-0.6	-1.51	-0.22	0.11	-0.66	-1.61	-0.04	-0.08	-0.63	-1.35	-0.23	-0.37	0.265	0.2225	0.175	0.539321	0.614831	0.637233	0.999971	1	0.93301
Cptp	Z4YLU2	0.22	0.31	0.29	-0.03	0.04	0.9	-0.03	0.63	-0.04	-0.05	-0.41	-0.31	-0.35	1.41	0.9	0.6	0.1875	-0.4	0.4425	0.481192	0.057151	0.249269	0.999971	1	0.839012
Cr1l	Q64735-2	0.08	0.32	0.19	-0.03	0.58	0.48	0.83	0.53	0.47	0.08	0.53	0.58	0.67	0.4	0.53	-0.31	0.465	0.275	0.1825	0.0297322	0.18153	0.483086	0.999971	1	0.896345
Crabp1	P62965	0.39	-0.24	-0.08	1.14	0.98	0.11	-0.55	1.7	1.27	0.93	-0.22	0.41	1.01	0.59	0.43	0.56	0.2575	0.295	0.345	0.632767	0.494902	0.315866	0.999971	1	0.85297
Cracd	E9Q5L4	0.33	-1.03	-0.04	-0.3	-0.58	-0.69	-0.05	0.01	-0.5	0.21	0.09	0.32	-0.65	-0.6	-0.23	0.14	-0.0675	0.29	-0.075	0.840931	0.400842	0.824946	0.999971	1	0.976309
Cracdl	F7B0R9	-0.01	-0.91	-1.82	-1.22	-0.92	-1.35	-1.72	-2.05	-1.4	0.18	-2.16	-1.35	-0.89	-0.95	-0.38	-0.66	-0.52	-0.1925	0.27	0.241227	0.736331	0.489337	0.999971	1	0.898346
Cracdl_1	E9Q3M9	0.54	-0.24	-0.35	0.01	-0.23	-0.08	-0.22	-0.07	-0.3	0.36	-0.62	-0.62	-0.31	-0.24	-0.38	-0.23	-0.14	-0.285	-0.28	0.5588	0.368807	0.255966	0.999971	1	0.839012
Cradd	O88843	-1.42	-0.33	-1.37	-1.22	-0.04	-0.28	-1.71	-0.86	-0.32	-1.73	-1.4	-0.84	-0.85	-0.4	-0.84	-0.76	0.3625	0.0125	0.3725	0.405173	0.974257	0.219626	0.999971	1	0.827064
Crat	H7BX88	-0.07	-0.13	-0.3	-0.52	-0.11	-0.06	-0.07	-0.35	-0.07	-0.05	-0.21	0.13	0.12	-0.21	-0.42	-0.5	0.1075	0.205	0.0025	0.574338	0.290217	0.990831	0.999971	1	0.99925
Crbn	Q8C7D2-2	-0.01	0.44	0.58	0.27	0.3	0.33	0.52	0.26	0.56	-0.06	0.61	0.81	-0.09	0.04	0.49	0.25	0.0325	0.16	-0.1475	0.8701	0.529955	0.513316	0.999971	1	0.905815
Creb1	Q01147-1	1.85	1.79	1.38	2.26	1.55	1.66	1.65	2.24	1.62	1.93	2.05	2.15	1.1	1.83	2	2.59	-0.045	0.1175	0.06	0.863434	0.630414	0.864012	0.999971	1	0.983079
Crebbp	A0A0U1RQB6	3.84	2.65	1.56	1.67	2.45	2.55	1.28	1.33	2	2.29	1.5	1.69	1.6	2.17	1.48	1.57	-0.5275	-0.56	-0.725	0.373795	0.296444	0.181345	0.999971	1	0.808532
Creg1	K4DI63	4.3	0.69	0.94	1.14	0.63	2.81	1.69	0.94	1.15	4.33	0.19	-0.01	-1.9	-0.17	0.08	0.1	-0.25	-0.3525	-2.24	0.77558	0.765276	0.0290195	0.999971	1	0.678474
Creg2	Q8BGC9	5.04	1.29	1.3	2.09	1.14	2.2	2.45	0.68	0.73	3.37	0.73	0.06	-1.94	-0.51	-0.23	0.01	-0.8125	-1.2075	-3.0975	0.368816	0.26279	0.00675374	0.999971	1	0.582714
Creld1	Q91XD7	0.63	0.51	1.93	2.13	0.59	0.7	2.07	1.73	0.86	0.16	1.72	0.34	0.06	-0.2	1.75	1.25	-0.0275	-0.53	-0.585	0.957736	0.315312	0.326587	0.999971	1	0.856472
Creld2	Q9CYA0	-0.35	1.58	0.84	-0.75	1.36	1.3	1.22	0.09	1.55	-0.22	0.88	0.53	1.62	0.36	0.58	-1.29	0.6625	0.355	-0.0125	0.259291	0.556487	0.9863	0.999971	1	0.99925
Crh	Q8CIT0	0.34	-0.86	-2.07	-1.33	-1.31	-0.85	-1.44	-2.44	-1.31	-0.09	-2.11	-2.56	-1.57	-1.14	-2	-2.05	-0.53	-0.5375	-0.71	0.353692	0.434839	0.186757	0.999971	1	0.809025
Crhbp	A0A217FL62	-1.13	-0.44	0.49	-0.61	-0.42	-0.68	0.39	-0.83	-0.45	-1.53	-0.03	0.18	-0.73	-1.05	-0.76	-0.48	0.0375	-0.035	-0.3325	0.927459	0.94141	0.357038	0.999971	1	0.868793
Crhr1	P35347	0.82	1.21	-1.03	-1.24	0.95	0.77	-1.38	-1.64	0.48	0.55	-0.41	-0.97	-1.26	0	-2.13	-1.09	-0.265	-0.0275	-1.06	0.751324	0.966876	0.15206	0.999971	1	0.795578
Crip1	A0A0G2JEK2	4.25	-1.51	1.26	3.2	4.06	4.13	2.4	0.31	-0.17	4.64	2.71	3.03	-6.16	-0.32	0.76	-0.19	0.925	0.7525	-3.2775	0.507151	0.604525	0.0951295	0.999971	1	0.78268
Crip2	Q9DCT8	0.86	1.74	0.89	0.67	1.93	1.51	0.88	0.82	1.58	1.26	0.69	1.35	1.38	1.53	1.28	0.14	0.245	0.18	0.0425	0.490709	0.564173	0.91181	0.999971	1	0.992551
Cript	O70333	2.82	0.69	1.71	2.57	0.27	2	2.68	3.37	0	2.41	0.91	-0.36	-1.87	2.67	2.84	2.08	0.1325	-1.2075	-0.5175	0.857916	0.117738	0.634316	0.999971	1	0.93301
Crk	Q64010	-0.67	-0.28	0.65	0.28	-0.28	-0.38	0.7	0.28	0.01	-0.6	0.65	0.65	-0.25	-0.51	0.53	0.01	0.085	0.1825	-0.05	0.820406	0.651325	0.88939	0.999971	1	0.987681
Crk_1	Q8JZR2	-0.45	-0.74	-0.34	-1.07	-0.33	0.11	-0.55	-0.08	-0.1	0.08	-0.8	-1.01	-1.02	0.15	-0.48	0.35	0.4375	0.1925	0.4	0.10396	0.544579	0.267982	0.999971	1	0.842746
Crkl	P47941	0.11	0.34	0.14	-0.07	0.66	0.33	0.06	0.03	0.35	0.12	0.33	0.37	0.73	0.38	0	0.19	0.14	0.1625	0.195	0.521152	0.371089	0.388829	0.999971	1	0.871816
Crlf3	Q9Z2L7	1.52	0.48	-0.45	0.49	0.6	0.94	0.23	-0.07	0.42	1.39	0.23	-0.43	-0.02	0.88	-0.09	0.2	-0.085	-0.1075	-0.2675	0.844291	0.833799	0.542278	0.999971	1	0.911119
Crls1	E9PUW6	0.76	0.55	0.59	1.23	-3.1	-0.18	-0.75	1.9	-0.12	1.86	-0.39	-0.85	0.7	-1.55	0.03	1.53	-1.315	-0.6575	-0.605	0.181363	0.266809	0.33705	0.999971	1	0.858827
Crmp1	P97427	-0.66	-3.8	-4.29	-3.4	-4.2	-3.88	-2.19	-4.3	-4.32	-2.15	-4.89	-5.28	-5.57	-4.01	-4.41	-3.46	-0.605	-1.1225	-1.325	0.484048	0.263539	0.138781	0.999971	1	0.784948
Crmp1_1	Q6P1J1	-0.85	-0.88	-0.6	-1.19	-0.65	-1.17	-0.19	-1.14	-0.41	-1.09	-0.54	-0.14	-0.54	-1.08	-0.76	-1	0.0925	0.335	0.035	0.739894	0.213944	0.872532	0.999971	1	0.984109
Crnkl1	P63154	-0.17	0.61	0.51	0.54	0.66	0.53	0.16	0.47	0.42	0.13	0.6	1.05	-0.32	0.78	0.84	0.84	0.0825	0.1775	0.1625	0.734149	0.530161	0.631568	0.999971	1	0.932858
Crocc	Q8CJ40	1.12	0.45	0.34	0.6	0.19	0.23	0.41	0.41	0.25	0.88	0.36	0.16	-0.22	0.47	0.24	0.13	-0.3175	-0.215	-0.4725	0.180183	0.414922	0.0882861	0.999971	1	0.766425
Crocc_1	Q8CJ40-2	-0.03	-1.04	3.81	3.19	1.54	-0.21	1.86	3.83	-0.21	0.97	4.77	5.79	-1.63	0.97	4.2	3.68	0.2725	1.3475	0.3225	0.832332	0.429746	0.839684	0.999971	1	0.979728
Crocc2	F6XLV1	-1.05	-1.16	-0.81	-0.51	-0.29	0.27	-0.77	-0.66	-0.27	-0.16	-1.7	-1.33	1.46	0.63	-0.33	-0.63	0.52	0.0175	1.165	0.0980671	0.964522	0.0318452	0.999971	1	0.681307
Crot	Q9DC50	-0.19	-1.06	-0.94	-0.57	-0.96	-0.56	-0.46	-0.2	-0.79	-0.33	-0.32	-0.82	-0.4	-0.76	-0.76	-0.31	0.145	0.125	0.1325	0.595523	0.634885	0.607062	0.999971	1	0.925193
Crppa	A0A1Y7VM96	-0.23	0.49	0.92	0.48	0.31	0.23	0.62	1.12	0.3	-0.08	0.57	1.1	0.25	0.25	1.04	0.59	0.155	0.0575	0.1175	0.625591	0.865813	0.704982	0.999971	1	0.950182
Crtac1	Q8R555	-1.95	-0.74	-0.73	-0.9	-0.51	-1.11	-0.84	-0.26	-0.39	-1.52	-0.67	-0.36	0.02	-1.1	-0.39	-0.88	0.4	0.345	0.4925	0.26168	0.381494	0.210584	0.999971	1	0.822657
Crtc1	Q68ED7	0.14	0.26	0.02	0.51	0.03	0.13	-0.08	0.26	-0.28	-0.42	-0.45	0.02	-0.16	0.03	0.05	0.31	-0.1475	-0.515	-0.175	0.451045	0.0295615	0.39466	0.999971	1	0.871816
Crtc2	Q3U182	-1.02	-0.44	1.24	0.33	-0.33	-0.11	2.7	0.98	-0.78	-1.27	1.74	0.67	-2.1	-0.64	0.99	0.19	0.7825	0.0625	-0.4175	0.320036	0.934819	0.577105	0.999971	1	0.918236
Crtc3	Q91X84	-1.77	0.23	-1.24	-2.64	0.4	-0.53	1.62	-1.93	0.04	-1.51	-0.16	-0.14	-0.19	-1.3	-1.1	-3.34	1.245	0.9125	-0.1275	0.173125	0.179245	0.874404	0.999971	1	0.984109
Cry2	Q9R194	2.01	1.08	1.05	1.69	1.39	1.45	1.33	1.48	0.61	1.78	1.14	1.12	0.46	1.59	1.45	1.71	-0.045	-0.295	-0.155	0.863209	0.388509	0.670213	0.999971	1	0.938809
Cryab	P23927	2.14	0.65	1.39	1.1	0.53	0.84	0.6	0.26	-0.49	-0.29	-1.67	-0.85	-0.65	0.82	0.41	-0.53	-0.7625	-2.145	-1.3075	0.0449679	0.000682775	0.0163036	0.999971	0.448349	0.613095
Crybb1	E9PYP8	-0.06	0.83	0.43	1.03	0.51	0.15	0.04	1.11	1.06	0.15	0.8	1.51	0.92	0.56	0.67	1.75	-0.105	0.3225	0.4175	0.756335	0.386023	0.258197	0.999971	1	0.839012
Crybg3	A0A338P6N4	2.12	-0.74	-0.51	-0.02	-0.1	-0.88	-0.24	-0.58	-0.58	2.1	0.11	0.45	-0.23	0.95	0.68	0.11	-0.6625	0.3075	0.165	0.298419	0.69615	0.797516	0.999971	1	0.970479
Cryl1	Q99KP3	-0.03	1.05	0.59	0.14	0.89	0.91	1.1	0.33	1.15	0.23	0.94	0.83	0.25	0.93	-0.06	-0.2	0.37	0.35	-0.2075	0.240288	0.284883	0.552043	0.999971	1	0.913595
Crym	O54983	-0.02	0.07	0.49	0.68	0.44	0.25	0.67	1.29	0.49	0.27	0.37	0.53	0.11	0.42	1.09	0.61	0.3575	0.11	0.2525	0.241365	0.617424	0.379843	0.999971	1	0.871816
Cryz	P47199	-0.68	-0.74	0.38	0.52	-0.27	-0.62	0.72	0.95	-0.56	-0.74	0.09	0.11	-0.93	-0.28	0.19	-0.04	0.325	-0.145	-0.135	0.497764	0.709082	0.734644	0.999971	1	0.957874
Cryzl1	Q921W4	-0.57	0.99	0.25	-0.8	0.77	0.93	0.2	-0.23	0.97	-0.53	0.32	-0.01	0.93	0.47	0	-0.76	0.45	0.22	0.1925	0.338601	0.649954	0.704436	0.999971	1	0.950182
Cryzl2	Q3UNZ8	-0.34	-0.69	-1.09	-0.94	-0.57	-0.23	-0.95	-0.17	-0.48	-0.49	-1.4	-1.01	-0.05	0.03	-0.68	-0.86	0.285	-0.08	0.375	0.297915	0.78142	0.217263	0.999971	1	0.826893
Cs	Q9CZU6	-0.83	-0.95	-0.93	-0.82	-1.15	-1.09	-1.02	-0.77	-1.2	-0.98	-0.95	-0.98	-1.16	-0.84	-0.78	-0.63	-0.125	-0.145	0.03	0.482623	0.386553	0.87306	0.999971	1	0.984109
Csad	Q9DBE0	0.23	0.41	0.33	0.24	0.58	0.28	-0.04	-0.82	0.66	0.11	0.07	0.16	0.39	-0.21	0.03	0.2	-0.3025	-0.0525	-0.2	0.341885	0.791921	0.324002	0.999971	1	0.85548
Csdc2	Q91YQ3	0.07	0.24	1.78	1.01	0.27	-0.16	0.71	0.43	0.3	0.7	2.07	0.57	0.63	0.42	1.61	1.24	-0.4625	0.135	0.2	0.278606	0.794439	0.658574	0.999971	1	0.934638
Csde1	Q91W50	0.33	1.07	1.2	1.17	0.84	1.12	1.13	1.39	1.1	0.85	1.46	1.38	0.92	1.31	1.41	1.6	0.1775	0.255	0.3675	0.498487	0.353241	0.197928	0.999971	1	0.813335
Cse1l	Q9ERK4	0.03	0.71	1.01	0.58	0.79	0.64	0.98	0.56	0.91	0.18	0.93	1	0.67	0.48	0.84	0.7	0.16	0.1725	0.09	0.530082	0.558072	0.717387	0.999971	1	0.952711
Csf1r	P09581	-0.25	0.5	0.12	0.74	0.89	0.6	0.36	0.7	0.38	0.03	0.73	0.78	0.09	1.11	0.74	0.91	0.36	0.2025	0.435	0.197429	0.490552	0.190347	0.999971	1	0.810547
Csk	P41241	-0.8	-0.32	-0.81	-0.96	-0.21	-0.29	-0.17	-0.71	-0.13	-0.5	-0.62	-0.34	-0.04	-0.01	-0.42	-0.54	0.3775	0.325	0.47	0.122528	0.16007	0.0681936	0.999971	1	0.733937
Csl	Q80X68	-0.61	-0.78	0.36	-0.44	-0.83	-1.22	1.08	-0.51	-0.53	-1.18	2.54	1.66	-0.42	-1.26	-0.05	-1.41	-0.0025	0.99	-0.4175	0.996166	0.252191	0.308569	1	1	0.847402
Csmd1	Q923L3	0.08	-0.44	-0.4	-0.36	-0.58	-0.47	-0.83	-0.18	-0.48	-0.34	-0.29	-0.21	-0.14	-0.85	-0.06	-0.03	-0.235	-0.05	0.01	0.307881	0.795747	0.968766	0.999971	1	0.998787
Csmd2	V9GX34	-0.25	-0.43	-0.77	-0.68	-0.48	-0.39	-0.43	-0.72	-0.59	-0.4	-0.5	-1.08	0.02	-0.55	-0.72	-0.58	0.0275	-0.11	0.075	0.889999	0.631683	0.752283	0.999971	1	0.961116
Csmd3	E9PWJ0	-0.01	-0.15	-0.8	-0.35	-0.22	-0.47	-0.59	-0.57	-0.22	0.04	-0.88	-0.99	0.12	-0.03	-0.48	-0.65	-0.135	-0.185	0.0675	0.561204	0.553524	0.803229	0.999971	1	0.971467
Csnk1a1	E9Q4G7	-0.24	1.23	1.17	1.23	0.65	1.97	2.29	-0.04	1.44	2.69	-0.29	0.04	2.7	-1.74	0.05	-0.3	0.37	0.1225	-0.67	0.542138	0.862084	0.459791	0.999971	1	0.889706
Csnk1a1_1	Q8BK63-2	-0.6	-0.21	-0.1	-0.12	-0.12	0.01	-0.37	0.02	-0.22	-0.37	0.26	0.2	0.39	0.02	0.17	0.37	0.1425	0.225	0.495	0.489688	0.340546	0.035188	0.999971	1	0.69205
Csnk1d	Q9DC28-2	1.17	-1.19	-0.59	-0.81	-1.62	-1.35	-0.23	-1.03	-0.95	1.58	-0.25	0.13	-1.74	-0.92	-0.14	-0.38	-0.7025	0.4825	-0.44	0.22615	0.485041	0.455221	0.999971	1	0.887217
Csnk1d_1	Q9DC28	-0.51	-0.54	-0.32	-0.37	-0.58	-0.66	-0.24	-0.19	-0.54	-0.85	-0.18	-0.89	-0.33	-0.56	-0.21	-0.04	0.0175	-0.18	0.15	0.927979	0.414303	0.438792	0.999971	1	0.883105
Csnk1e	Q9JMK2	0.27	-0.15	-1.25	-1.22	-0.26	-0.4	-0.76	-1.56	-0.64	0.21	-1.05	-0.9	0.2	-0.49	-1.31	-0.78	-0.1575	-0.0075	-0.0075	0.728177	0.98665	0.987113	0.999971	1	0.99925
Csnk1g1	A0A0U1RP94	-0.89	-1.45	-0.83	-0.81	-1.03	-1.91	-0.31	-1.01	-1.04	-1.24	-0.79	-1.21	-0.89	-1.77	-1.15	-0.47	-0.07	-0.075	-0.075	0.843317	0.737342	0.812648	0.999971	1	0.974458
Csnk1g2	Q99K78	0.83	-0.07	-0.54	-0.28	-0.33	0.39	-0.87	-0.65	-0.44	0.84	-0.7	-0.79	-0.15	-0.75	-1.06	-0.37	-0.35	-0.2575	-0.5675	0.379789	0.573587	0.135148	0.999971	1	0.784948
Csnk1g3	Q8C4X2	-1.52	-0.83	-2.07	-1.99	-0.99	-1.18	-2.07	-1.97	-0.93	-1.63	-2.04	-2.13	-0.74	-1.27	-1.99	-2.28	0.05	-0.08	0.0325	0.895452	0.833999	0.939241	0.999971	1	0.995869
Csnk2a1	Q60737	-0.99	-1.01	-0.7	-0.78	-0.76	-1.06	-0.82	-0.61	-0.85	-0.86	-0.6	-0.61	-0.32	-0.91	-0.91	-0.62	0.0575	0.14	0.18	0.761783	0.441844	0.404524	0.999971	1	0.87384
Csnk2a2	O54833	-0.98	-0.43	-0.46	-1.05	-0.07	-0.6	-0.29	-0.73	-0.12	-1.37	-0.01	0.21	0.39	-1.06	-0.31	-0.94	0.3075	0.4075	0.25	0.239792	0.299681	0.497484	0.999971	1	0.902655
Csnk2b	P67871	-0.39	0.01	-0.15	-0.15	0.15	0.15	-0.15	0.09	0.39	-0.49	0.01	0.08	1.07	-0.07	-0.21	-0.1	0.23	0.1675	0.3425	0.231092	0.479707	0.295011	0.999971	1	0.847402
Cspg4	Q8VHY0	-0.87	-0.88	-1.38	-1.01	-0.21	-0.89	-1.29	-1.22	-0.4	-0.42	-0.97	-0.54	-0.39	-0.57	-1.04	-0.8	0.1325	0.4525	0.335	0.646175	0.0651834	0.163622	0.999971	1	0.800215
Cspg5	Q71M36-2	-2.39	-3.75	-3.51	-2.84	-2.65	-3.38	-2.31	-2.58	-3.74	-1.88	-3.63	-3.28	-4.04	-2.99	-3.57	-1.81	0.3925	-0.01	0.02	0.309188	0.983839	0.969828	0.999971	1	0.998787
Cspg5_1	Q71M36	-1.05	0.36	-0.58	-0.65	-0.31	0.17	-0.76	-0.43	0.22	-0.08	-0.42	-0.52	0.71	0.12	-0.4	0.04	0.1475	0.28	0.5975	0.674152	0.419004	0.129945	0.999971	1	0.784948
Cspp1	D3Z378	0.08	0.78	0.84	0.16	-0.29	-1.07	0.33	1.28	-0.64	0.57	0.35	0.71	-0.62	0.89	0.83	1.43	-0.4025	-0.2175	0.1675	0.426722	0.546916	0.712645	0.999971	1	0.951793
Csrp1	P97315	-0.48	1.11	0.9	0.57	1.49	1.66	0.49	0.46	0.8	-0.07	1.02	0.98	0.65	0.83	1.02	0.49	0.5	0.1575	0.2225	0.281091	0.705513	0.543794	0.999971	1	0.911398
Csrp2	P97314	0.05	-0.62	0.61	1.68	4.8	2.74	0.82	-0.02	1.49	2.55	4.55	5.77	-2.53	0.67	1.47	0.74	1.655	3.16	-0.3425	0.141571	0.00981987	0.707533	0.999971	1	0.950182
Cst3	P21460	0.62	0.09	-0.57	-1.18	0.76	0.09	0.6	0.46	0.78	0.48	0.39	0.57	0.1	-0.13	-0.47	-0.97	0.7375	0.815	-0.1075	0.0915919	0.0606017	0.803219	0.999971	1	0.971467
Cstb	Q62426	1.11	0.71	1.26	1.22	0.27	0.75	0.44	0.65	0.3	1.07	0.23	0.79	-0.26	0.99	0.54	1.22	-0.5475	-0.4775	-0.4525	0.028576	0.0926994	0.212674	0.999971	1	0.823987
Cstf1	Q99LC2	0.75	1.41	1.62	1.49	1.34	1.37	0.82	1.62	1.32	1.36	1.39	0.38	0.44	1.71	1.17	1.8	-0.03	-0.205	-0.0375	0.912851	0.520742	0.917013	0.999971	1	0.992633
Cstf2	Q8BIQ5-2	0.7	1.14	1.52	1.71	0.84	0.98	1.48	1.57	0.65	0.64	1.27	1.43	0.72	0.93	1.62	1.91	-0.05	-0.27	0.0275	0.866168	0.392707	0.937829	0.999971	1	0.995618
Cstf2_1	F6ZKC7	1.23	3.03	1.06	1.51	2.19	2.63	0.2	2.59	3.16	1.89	0.27	2.18	3.37	3.57	1.8	3.38	0.195	0.1675	1.3225	0.769009	0.806611	0.0403992	0.999971	1	0.700838
Cstf2t	Q8C7E9	1.55	0.97	0.71	0.9	0.5	1.07	1.15	0.53	0.11	0.99	0.34	0.55	-0.1	0.73	0.49	0.22	-0.22	-0.535	-0.6975	0.423543	0.0796193	0.0291533	0.999971	1	0.678474
Cstf3	Q99LI7	0.69	1.99	1.74	1.48	1.86	1.57	1.43	1.3	1.79	0.92	2.02	1.65	1.83	1.63	1.43	1.9	0.065	0.12	0.2225	0.834504	0.739642	0.47631	0.999971	1	0.894333
Cstpp1	Q8BHR8	0.21	0.16	-0.09	0.16	0.39	0.58	-0.6	0.23	0.25	0.34	-0.44	-0.16	0.8	1.04	0.17	0.59	0.04	-0.1125	0.54	0.887565	0.626298	0.0432382	0.999971	1	0.701725
Ctbp1	O88712	-0.33	-1.19	-0.93	-0.98	-1.21	-0.93	-1.21	-1.29	-1.11	-0.76	-1.43	-1.33	-1.54	-0.78	-1.12	-0.93	-0.3025	-0.3	-0.235	0.220932	0.265301	0.391725	0.999971	1	0.871816
Ctbp2	Q91YZ2	0.38	0.26	0.63	0.66	0.06	0.15	0.48	1.01	0.09	0.39	0.17	-0.01	-0.41	0.21	0.44	0.09	-0.0575	-0.3225	-0.4	0.82474	0.11785	0.1207	0.999971	1	0.78268
Ctbs	Q8R242	0.29	1.7	1.69	1.82	2.23	1.11	1.93	1.74	1.95	0.68	1.22	1.5	2.26	0.86	1.57	1.19	0.3775	-0.0375	0.095	0.371342	0.92997	0.830693	0.999971	1	0.978535
Ctc1	Q5SUQ9-2	3.41	1.93	1.38	1.94	1.52	2.26	1.77	1.8	1.59	2.7	1.63	1.3	0.63	2.15	1.21	1.38	-0.3275	-0.36	-0.8225	0.459331	0.47549	0.125997	0.999971	1	0.783071
Ctcf	Q61164	-0.13	1.82	1	-0.17	3.23	1.1	2.11	0.15	4.14	0.67	0.37	1.23	5.27	0.61	0.33	-0.22	1.0175	0.9725	0.8675	0.191312	0.292519	0.479424	0.999971	1	0.894438
Ctdnep1	Q3TP92	-2.28	0.73	0.05	-1.2	-0.79	0.21	-0.25	-0.01	0.37	-1.51	1	1.34	2.72	0.17	0.13	-0.55	0.465	0.975	1.2925	0.472548	0.261174	0.167526	0.999971	1	0.800215
Ctdp1	Q7TSG2	1.62	1.5	1.61	1.51	1.21	1.3	1.61	1.72	1.02	1.42	1.37	1.35	0.98	1.51	1.31	1.28	-0.1	-0.27	-0.29	0.604689	0.148728	0.146155	0.999971	1	0.791767
Ctdsp1	P58466	-0.98	-0.93	-0.34	-0.85	-1.45	-1.64	0.05	-0.21	-1.83	-1.21	-0.65	-0.23	-0.99	-0.66	-0.4	-0.48	-0.0375	-0.205	0.1425	0.930119	0.580219	0.546928	0.999971	1	0.911447
Ctdspl	G3UXN0	-0.54	-0.67	-0.64	0.03	-0.6	-1.25	-0.89	0.25	-0.64	-0.72	0.05	0.08	-0.11	-0.65	-0.51	1.17	-0.1675	0.1475	0.43	0.636665	0.606061	0.324208	0.999971	1	0.85548
Ctdspl2	Q8BG15-6	-1.85	-1.78	-1.05	-1.75	-1.93	-2.14	-1.26	-1.57	-1.33	-1.47	-0.79	-1.07	-1.88	-1.91	-0.89	-1.21	-0.1175	0.4425	0.135	0.68029	0.117379	0.672567	0.999971	1	0.940005
Cth	Q8VCN5	0.37	0.02	-0.27	0.22	-0.08	0.52	-0.22	0.59	0.04	0.42	-0.2	-0.09	-0.38	0.48	-0.41	0.29	0.1175	-0.0425	-0.09	0.662884	0.852771	0.750615	0.999971	1	0.961064
Ctif	E9Q1U6	1.08	1.14	0.7	0.65	1.06	1.1	1.06	1.27	1.01	0.72	0.48	-0.07	0.67	1	0.56	0.75	0.23	-0.3575	-0.1475	0.261682	0.218572	0.487693	0.999971	1	0.897906
Ctif_1	Q6PEE2	-1.15	3.34	2.64	0.66	3.45	2.36	2.37	1.33	3.14	-1.36	1.76	2.14	5.33	1.08	1.61	1.71	1.005	0.0475	1.06	0.322001	0.969834	0.407255	0.999971	1	0.874911
Ctnna1	P26231	-0.1	-0.34	-0.89	-0.78	-0.27	-0.39	-0.95	-0.37	-0.28	-0.32	-0.92	-0.81	-0.57	-0.4	-0.83	-0.84	0.0325	-0.055	-0.1325	0.901671	0.83689	0.592037	0.999971	1	0.922837
Ctnna2	Q61301	-1.12	-1.42	-1.07	-1.15	-1.43	-1.14	-1.11	-1.02	-1.24	-1.01	-0.86	-0.95	-1.51	-1.26	-1.35	-1.14	0.015	0.175	-0.125	0.936355	0.350002	0.504879	0.999971	1	0.905277
Ctnna2_1	Q61301-2	-0.72	-0.24	-1.45	-1.14	-1.18	-1.5	-1.84	-0.06	-1.01	-0.61	0.33	-0.71	-1.68	-0.5	-1.26	-0.56	-0.2575	0.3875	-0.1125	0.561857	0.320954	0.765018	0.999971	1	0.962405
Ctnna3	Q65CL1	1.23	-0.75	1.45	-0.6	-1.45	0.36	0.91	-1.42	-0.48	-0.84	-0.13	0.38	-1.33	-1.47	0.31	-0.93	-0.7325	-0.6	-1.1875	0.34777	0.322466	0.0937286	0.999971	1	0.776618
Ctnnb1	Q02248	-0.84	-1.15	-1.06	-1.18	-1.14	-0.76	-0.66	-1.13	-0.73	-0.75	-0.8	-0.96	-1.23	-1.12	-1.22	-1.21	0.135	0.2475	-0.1375	0.510383	0.177694	0.434622	0.999971	1	0.882419
Ctnnbip1	Q9JJN6	-0.63	0.69	-0.66	-0.19	0.3	0.07	-0.95	-0.1	0.64	-0.77	-0.57	-0.11	1.26	0.63	-0.04	-0.06	0.0275	-0.005	0.645	0.944895	0.990539	0.152976	0.999971	1	0.795578
Ctnnbl1	Q9CWL8	1.07	2.13	2.53	2.38	2.43	1.8	2.3	2.09	2.06	1.56	2.77	2.83	2.02	2.02	2.66	2.31	0.1275	0.2775	0.225	0.717043	0.519764	0.532356	0.999971	1	0.910069
Ctnnd1	P30999-2	-1.14	-1.94	-2.1	-1.84	-1.97	-2.2	-0.09	-1.86	-0.52	-2.27	-0.08	-0.2	0.15	-3.33	-2.41	-1.36	0.225	0.9875	0.0175	0.64903	0.0816166	0.980114	0.999971	1	0.99925
Ctnnd1_1	G3X9V2	-0.32	-0.78	-0.59	-0.77	-0.59	-0.76	-0.09	-0.72	-0.16	-0.22	-0.21	-0.55	0.03	-0.95	-0.89	-0.47	0.075	0.33	0.045	0.742317	0.120076	0.868029	0.999971	1	0.983462
Ctnnd2	E9QKH8	-1.51	-1.3	-0.86	-1.3	-1.3	-1.05	-0.58	-1.2	-0.97	-1.08	-1.11	-1.33	-2.23	-1.24	-2.42	-2.24	0.21	0.12	-0.79	0.395611	0.563418	0.0284696	0.999971	1	0.678474
Ctnnd2_1	A0A2I3BQV6	-0.8	-2.17	-1.76	-0.76	-1.32	-1.77	-1.26	-0.42	-1.27	-1.8	-1.79	-1.71	-1.48	-1.51	-0.84	-0.68	0.18	-0.27	0.245	0.674435	0.466483	0.540618	0.999971	1	0.910252
Ctps1	P70698	-0.96	-0.09	0.07	-0.29	-0.21	-0.12	0.61	0.21	-0.16	-0.68	0.17	0.1	0.28	-0.06	0.41	-0.45	0.44	0.175	0.3625	0.168803	0.568313	0.253787	0.999971	1	0.839012
Ctps2	P70303	0.59	0.69	0.66	0.06	0.44	0.42	0.5	0.68	0.38	0.53	0.51	0.88	1.08	0.73	1.13	0.54	0.01	0.075	0.37	0.961999	0.736253	0.147768	0.999971	1	0.793248
Ctr9	Q62018	0.57	0.98	0.77	1.35	0.85	0.79	0.65	1.23	0.64	0.5	0.92	1.23	0.52	1.16	1.18	1.46	-0.0375	-0.095	0.1625	0.875976	0.710987	0.561221	0.999971	1	0.91591
Ctsa	G3X8T3	-0.2	0.53	-0.26	-0.04	0.65	0.46	0.1	0.1	0.8	-0.56	0.01	-0.06	0.86	0.8	-0.06	-0.17	0.32	0.04	0.35	0.226918	0.904168	0.302789	0.999971	1	0.847402
Ctsb	P10605	0.44	1.07	1.11	1.17	1.04	1.23	0.88	1.58	1.22	0.51	1.21	1.11	0.82	1.18	1.11	1.39	0.235	0.065	0.1775	0.366244	0.803758	0.467754	0.999971	1	0.89205
Ctsc	P97821	0.23	0.98	2.03	0.05	1.28	0.56	0.79	1.51	0.39	-0.1	1.08	1.35	0.06	1.17	2.14	-0.24	0.2125	-0.1425	-0.04	0.651035	0.783508	0.950344	0.999971	1	0.998038
Ctsd	P18242	-0.51	0.66	0.17	0	0.41	0.62	0.06	0.39	0.71	-0.09	0.45	0.39	0.68	0.96	0.45	0.32	0.29	0.285	0.5225	0.319092	0.356181	0.100385	0.999971	1	0.78268
Ctsf	Q9R013	1.46	0.4	1.16	0.9	0.31	0.7	0.85	2.06	0.3	0.67	1.86	1.57	-0.01	0.55	1.18	1.33	5.88785e-17	0.12	-0.2175	1	0.770928	0.561264	1	1	0.91591
Ctsh	P49935	1.1	-0.06	0.11	0.34	-0.17	0.96	-0.24	0.51	0.2	1.82	1.04	-0.56	-0.74	0.54	0.46	0.52	-0.1075	0.2525	-0.1775	0.773217	0.637719	0.64984	0.999971	1	0.933842
Ctsl	P06797	-0.12	-0.54	0.03	-0.34	-0.23	-0.57	0.35	1.15	-0.92	-0.64	0.6	0.58	-0.21	-0.29	0.54	0.11	0.4175	0.1475	0.28	0.291465	0.714099	0.28628	0.999971	1	0.846029
Ctso	Q8BM88	2.63	6.87	2.19	1.23	7.06	5.13	4	2.04	8.11	3.71	3.47	3.37	11.39	3.15	2.18	2.46	1.3275	1.435	1.565	0.370435	0.356842	0.4918	0.999971	1	0.899692
Ctss	F6WR04	1.71	1.4	1.06	0.63	1.07	1.47	0.26	0.72	1	1.52	0.87	0.76	0.8	1.36	0.88	1.13	-0.32	-0.1625	-0.1575	0.361945	0.585457	0.577786	0.999971	1	0.918581
Ctsz	Q9WUU7	-1.77	1.7	0.96	-0.18	2.17	0.91	0.83	1.22	2.88	-1.05	1.14	1.3	3.98	0.63	1.49	-0.06	1.105	0.89	1.3325	0.15861	0.382255	0.220692	0.999971	1	0.827096
Cttn	Q60598	-1.07	-2.17	-0.6	-0.52	-2.12	-1.91	-0.19	-0.5	-1.96	-1.4	-0.65	-0.75	-2.77	-2.28	-0.73	-0.63	-0.09	-0.1	-0.5125	0.87378	0.827518	0.406814	0.999971	1	0.874911
Cttnbp2	B9EJA2-5	-0.3	-0.72	-0.24	-0.14	-0.46	-0.57	-0.4	-0.28	-0.5	-0.33	-0.18	-0.27	-0.52	-0.63	-0.37	0.02	-0.0775	0.03	-0.025	0.699122	0.880043	0.913411	0.999971	1	0.992618
Cttnbp2nl	Q99LJ0	0.54	-0.54	0.41	0.67	-0.48	-0.51	0.25	0.26	-0.66	-0.01	0.42	0.4	-1.17	-0.12	0.42	0.33	-0.39	-0.2325	-0.405	0.276341	0.528422	0.361232	0.999971	1	0.869526
Ctu1	Q99J10	3.15	0.57	0.61	0.42	0.35	0.98	0.15	0.85	0.04	1.82	0.1	0.2	-0.7	0.39	0.64	0.3	-0.605	-0.6475	-1.03	0.344874	0.374841	0.141454	0.999971	1	0.784967
Ctu2	Q3U308	0	0.67	-0.64	-1.2	0.25	0.23	-0.81	-1.19	0.25	-0.11	-0.1	-0.44	0.45	0.24	-0.78	-1.35	-0.0875	0.1925	-0.0675	0.862373	0.639654	0.900598	0.999971	1	0.990593
Cuedc1	Q8R3V6	-0.51	-0.88	-0.29	-0.21	-0.92	-0.54	-0.58	-0.15	-0.22	-0.3	-0.09	0.49	-0.58	-0.78	-0.32	-0.4	-0.075	0.4425	-0.0475	0.761715	0.111814	0.832174	0.999971	1	0.979036
Cuedc2	A0A494BB93	0.25	1.44	1.59	1.47	1.15	1.28	1.1	1.36	1.09	0.79	1.46	1.75	0.84	1.45	1.59	1.79	0.035	0.085	0.23	0.913246	0.817411	0.53413	0.999971	1	0.910077
Cul1	Q9WTX6	-0.01	0.49	0.6	0.32	0.39	0.53	0.79	0.22	0.65	0.15	0.66	0.53	0.69	0.24	0.34	0.31	0.1325	0.1475	0.045	0.554907	0.507469	0.834329	0.999971	1	0.979036
Cul2	Q9D4H8	0.11	-0.03	-0.2	-0.58	-0.01	0.01	0.31	-0.55	0.15	-0.16	-0.15	-0.53	-0.24	-0.13	-0.54	-0.67	0.115	0.0025	-0.22	0.65687	0.991543	0.357325	0.999971	1	0.868793
Cul3	Q9JLV5	-0.82	-0.36	-1.22	-1.4	-0.25	-0.22	-0.46	-1.41	0.15	-0.67	-1.01	-1.08	-0.33	-0.54	-1.31	-1.5	0.365	0.2975	0.03	0.31934	0.414382	0.933501	0.999971	1	0.995138
Cul4a	Q3TCH7	-0.37	0.4	0.8	0.84	0.23	0.19	0.73	0.51	0.24	-0.09	0.7	0.73	0.08	0.21	0.57	0.76	-0.0025	-0.0225	-0.0125	0.993609	0.947099	0.969163	0.999971	1	0.998787
Cul4b	A2A432	1.22	0.78	0.87	0.82	0.84	0.91	0.72	0.45	0.91	1.1	0.57	0.49	0.52	1.01	0.55	0.68	-0.1925	-0.155	-0.2325	0.350355	0.482393	0.276273	0.999971	1	0.843794
Cul5	Q9D5V5	-0.2	0.13	0.52	0.66	0.16	0	0.09	0.47	0.2	-0.13	0.39	0.72	-0.16	-0.01	0.42	0.6	-0.0975	0.0175	-0.065	0.695863	0.949831	0.816705	0.999971	1	0.974929
Cul7	Q8VE73-3	5.16	1.53	0.15	0.31	1.29	1.8	0.56	0.62	2.12	0.84	-0.42	0.01	5.74	3.13	0.59	0.03	-0.72	-1.15	0.585	0.506944	0.335254	0.707844	0.999971	1	0.950182
Cul9	E9QP09	-0.32	-0.31	-0.54	-0.96	-0.13	-0.32	-0.67	-0.59	-0.23	-0.6	-0.51	-0.71	-0.27	-0.57	-0.58	-0.71	0.105	0.02	0	0.653793	0.928342	1	0.999971	1	1
Custos	Q3UY34	1.56	2.21	2.12	1.9	1.78	1.54	1.29	2.37	2.24	1.43	2.07	2.18	1.74	2.57	2.27	2.13	-0.2025	0.0325	0.23	0.485136	0.899868	0.374237	0.999971	1	0.87031
Cuta	D5MCW4	-1.1	-0.1	0.44	-0.37	-0.36	-0.44	0.07	-0.2	-0.43	-1.17	0.42	0.29	-0.75	-0.6	0.11	-0.58	0.05	0.06	-0.1725	0.88195	0.895781	0.638134	0.999971	1	0.93301
Cutc	Q9D8X1	1.64	2.16	1.24	1.77	1.89	1.85	0.95	1.25	1.28	1.6	0.63	0.57	0.85	1.64	0.91	1.27	-0.2175	-0.6825	-0.535	0.482697	0.0566711	0.082847	0.999971	1	0.755254
Cux1	H3BKT0	1.5	0.37	0.17	-0.52	0.72	0.67	-0.16	-0.5	0.64	1.55	0.14	0.5	-0.17	0.63	0.15	-0.38	-0.1975	0.3275	-0.3225	0.683252	0.502779	0.476233	0.999971	1	0.894333
Cux1_1	H3BK24	1.84	1.43	0.54	0.88	1.22	1.13	0.44	0.49	1.05	1.33	0.36	0.58	0.42	0.83	0.51	0.31	-0.3525	-0.3425	-0.655	0.326258	0.34873	0.0626517	0.999971	1	0.725348
Cwc15	Q9JHS9	1.68	1.84	0.76	0.01	1.65	1.9	0.48	-0.58	1.41	1.54	0.81	0.47	-0.27	0.84	0.02	-0.33	-0.21	-0.015	-1.0075	0.74628	0.974264	0.0578807	0.999971	1	0.725348
Cwc22	B1AYU7	0.74	0.17	-0.26	-0.59	0.33	0.2	0.31	-0.71	0.31	0.57	-0.12	-0.2	-0.06	0.03	-0.52	-1.14	0.0175	0.125	-0.4375	0.962156	0.7119	0.268132	0.999971	1	0.842746
Cwc25	Q9DBF7	-0.81	0.72	0.32	-0.51	1.22	0.42	-0.11	0	0.73	-1.31	-0.19	-0.2	0.52	0.27	-0.19	-0.12	0.4525	-0.1725	0.19	0.317905	0.735827	0.619684	0.999971	1	0.929296
Cwc27	Q3TKY6	0.66	1.04	0.93	1.35	0.79	0.81	0.74	1.06	0.48	0.66	0.91	0.84	0.78	1.35	1	1.49	-0.145	-0.2725	0.16	0.496154	0.227329	0.52129	0.999971	1	0.907001
Cx3cl1	O35188	-0.21	0.48	0.1	0.18	0.23	0.72	0.13	0.09	-0.08	-0.18	0.42	0.48	0.12	0.74	0.23	0.69	0.155	0.0225	0.3075	0.518779	0.927518	0.228506	0.999971	1	0.828687
Cx3cr1	Q9Z0D9	0.06	1.31	1.34	1.31	0.96	2.15	1.3	0.57	1.99	1.23	1.28	2.63	0.74	1.85	2.58	2.09	0.24	0.7775	0.81	0.58419	0.100711	0.111411	0.999971	1	0.78268
Cxadr	P97792	-0.62	-2.19	-2.8	-2.44	-1.62	-1.99	-1.76	-2.11	-1.14	-1.26	-1.98	-2.29	-0.73	-1.86	-2.15	-1.83	0.1425	0.345	0.37	0.757964	0.509399	0.490981	0.999971	1	0.898873
Cxcl12	H7BX38	-1.39	-1.21	-1.52	-3.74	0.31	-1.83	0.39	-4.31	0.09	-1.9	-1	-2.18	-0.63	-0.88	-1.84	-2.3	0.605	0.7175	0.5525	0.592223	0.329355	0.404784	0.999971	1	0.874011
Cxcl14	Q9WUQ5	4.26	1.22	1	1.91	0.92	2.98	1.96	0.86	1.7	3.19	0.65	0.32	-0.52	0.74	0.61	0.06	-0.4175	-0.6325	-1.875	0.607802	0.483916	0.0275358	0.999971	1	0.678474
Cxxc1	Q9CWW7	4.83	4.45	3.16	3.42	3.7	2.51	1.72	3.24	3.75	4.36	2.03	2.55	0.35	1.34	2.83	2.95	-1.1725	-0.7925	-2.0975	0.0555171	0.218301	0.0119467	0.999971	1	0.613095
Cyb561	Q60720	1.21	-0.69	-1.58	-1.25	-0.76	-0.45	-0.87	-0.98	-1.25	0.29	-1.98	-0.82	-0.2	0.36	-1.16	0.41	-0.1875	-0.3625	0.43	0.74692	0.613536	0.517644	0.999971	1	0.905815
Cyb561d2	A0A0A6YY22	0.08	-0.7	-0.57	-0.3	-1.9	-1.04	-0.43	-0.56	-1.68	0.28	-0.58	-0.99	-2.48	-0.06	0.4	-0.42	-0.61	-0.37	-0.2675	0.121566	0.392001	0.658495	0.999971	1	0.934638
Cyb5a	G5E850	-1.03	-0.9	-1.06	-1.26	-0.95	-0.96	-0.97	-1.06	-0.82	-1	-1.17	-0.93	-0.93	-1.11	-1.06	-0.46	0.0775	0.0825	0.1725	0.652532	0.645519	0.430081	0.999971	1	0.881611
Cyb5b	Q9CQX2	-0.13	-1.42	-0.98	-0.79	-1.15	-1.21	-0.94	-0.68	-1.51	-0.82	-1.2	-1.19	-1.71	-1.44	-0.7	-0.78	-0.165	-0.35	-0.3275	0.587375	0.274134	0.371892	0.999971	1	0.869526
Cyb5d2	Q5SSH8	-0.66	-0.41	0.7	0.81	0.02	-0.95	0.05	0.96	0.3	-1.35	1.06	0.49	-0.1	-1.95	0.8	0.72	-0.09	0.015	-0.2425	0.857784	0.979639	0.71946	0.999971	1	0.954401
Cyb5r1	Q9DB73	-0.54	-0.49	-2.34	-1.9	-0.27	-0.48	-1.97	-2.24	-0.22	-0.37	-1.64	-1.64	-0.15	-0.28	-1.92	-1.57	0.0775	0.35	0.3375	0.901751	0.539667	0.574284	0.999971	1	0.91816
Cyb5r3	Q9DCN2	-0.47	-0.74	-1.3	-1.2	-0.54	-0.76	-1.18	-1.27	-0.64	-0.46	-1.22	-1	-0.86	-0.49	-1.22	-1.21	-0.01	0.0975	-0.0175	0.971204	0.724411	0.949777	0.999971	1	0.998038
Cyb5r4	Q3TDX8	0.26	0.69	0.74	1.14	0.3	0.99	0.49	1.29	0.38	0.5	1.04	0.85	0.58	0.96	0.7	1.26	0.06	-0.015	0.1675	0.840756	0.953663	0.523561	0.999971	1	0.907797
Cybc1	Q3TYS2	0.14	-0.12	-0.76	-0.7	0.14	0.21	-0.2	-0.12	-0.61	0.23	0.27	-0.09	-0.28	0.34	-0.52	-0.87	0.3675	0.31	0.0275	0.187074	0.3254	0.934626	0.999971	1	0.995618
Cyc1	Q9D0M3	-0.75	-1.38	-1.36	-1.55	-1.09	-1.49	-0.72	-1.35	-1.23	-0.99	-1.16	-0.74	-0.96	-1.37	-1.46	-1.56	0.0975	0.23	-0.0775	0.713793	0.346617	0.755829	0.999971	1	0.961116
Cycs	P62897	-1.53	-1.46	-1.17	-1.21	-1.43	-1.9	-0.81	-1.64	-1.78	-1.65	-1.19	-1.19	-1.87	-1.55	-1.15	-1.09	-0.1025	-0.11	-0.0725	0.704052	0.61807	0.76134	0.999971	1	0.961116
Cyfip1	Q7TMB8	-1.04	-0.46	-0.66	-0.72	-0.33	-0.47	-0.77	-0.39	-0.63	-1.09	-0.62	-0.5	-0.25	-0.6	-0.68	-0.55	0.23	0.01	0.2	0.284587	0.963467	0.34662	0.999971	1	0.864164
Cyfip1_1	A0A0R4J119	-0.79	0.27	-1.65	-2.36	0.07	-0.46	-1.72	-1.38	-0.61	-0.95	-1	-1.51	-0.17	-0.28	-1.81	-2.09	0.26	0.115	0.045	0.68429	0.834791	0.947676	0.999971	1	0.997651
Cyfip2	Q5SQX6	-0.98	-1.14	-0.74	-0.62	-1.23	-1.4	-0.75	-0.87	-1.13	-1.22	-0.54	-0.63	-1.31	-1.25	-0.74	-0.47	-0.1925	-0.01	-0.0725	0.411915	0.966592	0.779886	0.999971	1	0.965847
Cygb	Q9CX80	0.75	0.48	0.86	1.19	0.82	0.64	0.96	1.75	1.06	0.75	0.92	0.99	0.82	0.98	1.69	1.05	0.2225	0.11	0.315	0.458774	0.600989	0.251945	0.999971	1	0.839012
Cyhr1	Q9QXA1	-0.8	1.46	1.78	1.85	0.91	1.68	1.11	1.96	0.55	-0.73	2.1	1.5	-0.03	1.37	1.75	2.29	0.3425	-0.2175	0.2725	0.581012	0.785511	0.707811	0.999971	1	0.950182
Cyld	Z4YJJ5	-0.06	0.52	0.45	0.72	0.56	0.04	-0.14	0.78	0.48	0.18	0.44	0.85	1.14	0.69	0.86	0.79	-0.0975	0.08	0.4625	0.733521	0.743761	0.0712816	0.999971	1	0.737413
Cyp20a1	Q8BKE6	-0.57	0.23	0.68	-0.87	0.83	-0.63	1.49	-0.64	1.29	-0.52	0.79	1.39	1.09	-0.77	0.07	-0.68	0.395	0.87	0.06	0.507123	0.124963	0.907678	0.999971	1	0.991405
Cyp2d22	Q9JKY7	-0.2	-0.68	-1.4	-1.8	-0.41	-0.63	-1.48	-0.93	-0.72	-0.62	-1.51	-1.32	-0.2	-0.53	-1.56	-1.32	0.1575	-0.0225	0.1175	0.699613	0.955382	0.795323	0.999971	1	0.970361
Cyp2j6	O54750	-2.74	-0.36	-0.09	-0.03	-0.07	-0.13	-0.24	0.77	0.46	-1.42	0.41	0.8	0.79	0.96	0.58	0.69	0.8875	0.8675	1.56	0.181112	0.262959	0.0268048	0.999971	1	0.678474
Cyp2j9	Q924D1	-0.42	-0.47	-0.02	-0.18	-0.12	0.21	-0.45	0.47	-0.02	0.04	-0.17	-0.11	0.61	0.22	0.11	0.18	0.3	0.2075	0.5525	0.254109	0.275754	0.024413	0.999971	1	0.669611
Cyp2s1	D3Z7F1	-1.61	0.13	-0.87	-0.94	-0.43	-1.64	-1.25	-0.98	-0.09	-1.8	-1.07	-0.69	-0.42	-0.9	-1.54	-2.08	-0.2525	-0.09	-0.4125	0.549178	0.849679	0.397354	0.999971	1	0.871816
Cyp46a1	Q9WVK8	0.01	-0.09	-0.31	-0.27	-0.09	0.2	-0.45	-0.01	-0.03	0.17	-0.06	0.19	0.56	0.43	0.06	0.27	0.0775	0.2325	0.495	0.709677	0.209575	0.0300341	0.999971	1	0.678474
Cyp4f14	Q9EP75	-1.39	-1.59	-0.99	-1.17	-1.35	-1.37	-0.19	-0.75	-1.46	-1.14	-0.05	-0.26	-1.54	-1.23	-0.64	-0.85	0.37	0.5575	0.22	0.257621	0.14449	0.411116	0.999971	1	0.875847
Cyp4f16	Q99N17	-1.43	-0.92	-0.88	0.25	-0.61	-0.28	-1.47	-0.42	-1.53	-1.21	-2.72	-0.71	-0.88	-0.83	-0.14	-0.65	0.05	-0.7975	0.12	0.905339	0.14866	0.752669	0.999971	1	0.961116
Cyp4x1	A2A9Y7	-0.67	-0.11	-0.54	-1.03	0.11	-0.62	-0.08	-0.86	0.07	-0.59	-0.42	-0.75	0.27	-0.58	-0.7	-0.66	0.225	0.165	0.17	0.465118	0.553522	0.581802	0.999971	1	0.920364
Cyp51a1	Q8K0C4	-1.39	-0.91	-0.61	-1.06	-0.8	-1.07	-0.52	-0.91	-0.7	-1.27	-0.55	-0.65	-0.05	-0.43	-0.15	-0.43	0.1675	0.2	0.7275	0.482003	0.438756	0.0106959	0.999971	1	0.613095
Cyp7b1	Q60991	-0.06	-1.43	-1.12	-0.58	-1.09	-0.69	-1.32	-0.51	-1.28	-0.56	-0.63	-0.63	-2.29	-1.19	-0.54	-0.44	-0.105	0.0225	-0.3175	0.763423	0.947526	0.51895	0.999971	1	0.905901
Cyria	Q8BHZ0	-0.17	0.06	-0.06	-0.19	0.28	0.11	0.35	0.09	0.28	-0.22	0.11	-0.05	0.17	0.24	-0.19	0.22	0.2975	0.12	0.2	0.114245	0.525158	0.302625	0.999971	1	0.847402
Cyrib	A0A2I3BQK1	-3.65	2.88	2.12	0.41	2.87	3.02	1.17	2.14	2.58	-2.23	2.16	2.5	4.09	2.24	1.87	1.61	1.86	0.8125	2.0125	0.190925	0.627884	0.172014	0.999971	1	0.804075
Cyrib_1	Q921M7	0.48	0.21	0.11	0.36	0.04	0.31	0.14	0.12	0.16	0.32	-0.01	-0.32	-0.28	0.01	-0.15	-0.05	-0.1375	-0.2525	-0.4075	0.450924	0.243959	0.048393	0.999971	1	0.710102
Cys1	A0A0R4J216	0.77	-1.62	-1.45	-1.18	-0.88	-0.53	0.86	-2.43	-0.71	0.39	-1.37	-2.58	-2.82	-1.87	-2.7	-4.61	0.125	-0.1975	-2.13	0.873544	0.793878	0.015608	0.999971	1	0.613095
Cystm1	D3YVS7	-2.49	-4.29	-0.64	-0.64	-2.41	-3.58	-1.02	-1.4	-4.5	-3.48	-0.81	-0.74	-4.39	-3.09	-0.14	-0.45	-0.0875	-0.3675	-0.0025	0.925352	0.751602	0.998341	0.999971	1	1
Cyth1	Q9QX11-2	-1.18	-0.47	0.13	0.68	-0.52	-0.33	-0.07	0.67	-0.56	-0.6	0.4	0.16	-0.28	-0.03	0.6	1.04	0.1475	0.06	0.5425	0.742708	0.893046	0.264721	0.999971	1	0.842533
Cyth2	A0A1B0GQW2	2.8	-0.11	1.46	-0.62	0.12	-0.32	1.05	0.64	-0.28	1.54	0.02	0.69	0.84	0.08	-0.78	1.15	-0.51	-0.39	-0.56	0.502405	0.625194	0.490134	0.999971	1	0.898612
Cyth2_1	Q99KH2	-0.88	-1.22	-1.11	-0.98	-1.22	-1.36	-1.33	-0.92	-1.18	-1.06	-0.79	-1.1	-1.31	-1.22	-1.1	-0.81	-0.16	0.015	-0.0625	0.412316	0.934304	0.749662	0.999971	1	0.961064
Cyth3	O08967	1	1.46	1.11	1.18	1.16	1.31	0.43	1.3	1.01	1.34	1.1	0.4	1.95	1.28	0.83	1.3	-0.1375	-0.225	0.1525	0.594666	0.377701	0.576353	0.999971	1	0.918194
Czib	Q8BHG2	1.01	1.36	1.33	0.83	1.24	1.12	1.41	0.54	1.29	0.47	0.95	0.86	0.88	0.32	0.38	0.25	-0.055	-0.24	-0.675	0.828791	0.334178	0.0160199	0.999971	1	0.613095
D030056L22Rik	Q3U2A5	4.88	1.45	2.33	2.24	1.3	1.43	2.02	2.7	1.11	2.08	2.07	1.47	-0.63	0.25	0.88	1.9	-0.8625	-1.0425	-2.125	0.257322	0.168276	0.0280518	0.999971	1	0.678474
D17h6s53e	Q9Z1R4	0.84	-0.1	-0.88	-0.55	0.01	0.56	-0.52	-0.62	-0.08	0.59	-0.95	-1.47	0.38	0.38	-0.82	-0.45	0.03	-0.305	0.045	0.945042	0.579566	0.920623	0.999971	1	0.992702
D2hgdh	E9QN44	-1.89	-1.12	-0.76	-2.15	-2.02	-0.61	-2.03	-2.3	-1.12	-1.14	-2.33	-0.31	-0.34	-0.73	-2.96	-1.14	-0.26	0.255	0.1875	0.582058	0.607324	0.757711	0.999971	1	0.961116
D3Ertd751e	Q8BGN2	-0.08	-0.21	0.42	0.43	-0.24	0.05	0.3	0.77	-0.49	-0.43	0.44	0.55	-0.31	0.56	0.97	0.35	0.08	-0.1225	0.2525	0.779164	0.706271	0.436307	0.999971	1	0.882419
D430041D05Rik	A0A2R8VKG2	-1.22	-1.13	-0.86	-0.91	-1.34	-1.05	-0.8	-1.01	-1.41	-1.38	-0.88	-0.99	-1.26	-1.37	-1.12	-0.96	-0.02	-0.135	-0.1475	0.920077	0.521426	0.448683	0.999971	1	0.885333
D630045J12Rik	D3YTS3	-0.79	-1.08	-1.03	-1.02	-1.32	-0.84	-0.92	-1.11	-1.19	-0.82	-1.05	-1.05	-0.67	-0.86	-1	-0.73	-0.0675	-0.0475	0.165	0.724937	0.787999	0.369476	0.999971	1	0.869526
D6Wsu163e	Q91YN0	0.66	0.47	0.18	-0.54	0.18	0.61	1.3	-0.81	0.3	0.47	0.03	0.11	0.07	0.58	-0.27	-0.9	0.1275	0.035	-0.3225	0.790322	0.904382	0.419521	0.999971	1	0.87788
D8Ertd738e	Q8R1F0	1.86	0.74	1.69	-0.28	1.76	-0.57	2.46	-0.22	0.52	0.46	1.64	1.22	0.6	0.94	0.24	-2.39	-0.145	-0.0425	-1.155	0.856064	0.935816	0.18064	0.999971	1	0.808532
Daam1	Q8BPM0	-0.79	-1.91	-0.76	-0.87	-1.87	-1.41	-0.62	-1.06	-1.54	-1.05	-0.8	-0.71	-1.97	-1.93	-1.1	-1.05	-0.1575	0.0575	-0.43	0.672987	0.862543	0.258794	0.999971	1	0.839012
Daam2	Q80U19	-0.41	-0.76	-1.55	-1.48	-0.62	-0.85	-1.26	-1.83	-0.38	-0.54	-1.31	-1.13	-0.08	-1.26	-1.92	-1.11	-0.09	0.21	-0.0425	0.809208	0.554193	0.923734	0.999971	1	0.993382
Dab1	F2Z465	-0.24	0.5	-0.04	0.45	0.1	0.27	-0.45	-0.01	0.39	0.13	0.24	0.24	0.63	0.23	-0.31	0.24	-0.19	0.0825	0.03	0.474142	0.716982	0.915058	0.999971	1	0.992633
Dab2	E9PX84	-0.18	0.16	-0.21	0.57	0.6	-0.17	-0.32	-0.07	0.31	-0.24	-0.71	0.62	0.22	0.73	0.65	0.2	-0.075	-0.09	0.365	0.79346	0.79287	0.177898	0.999971	1	0.808532
Dab2ip	Q3UHC7	-1.06	-1.23	-0.98	-0.62	-1.31	-1.24	-1.05	-0.62	-1.29	-1.04	-0.87	-1.01	-0.87	-1.04	-1.06	-0.52	-0.0825	-0.08	0.1	0.72756	0.697795	0.655108	0.999971	1	0.934061
Dact2	Q7TN08	1.75	-0.27	0.85	1.4	-0.12	1.08	4.06	1.04	-0.72	0.08	1.63	1.19	-1.38	-0.19	0.76	1.84	0.5825	-0.3875	-0.675	0.518596	0.545017	0.371279	0.999971	1	0.869526
Dact3	Q0PHV7	1.91	-0.69	-0.3	-0.26	-0.57	0.03	0.45	-0.47	-0.3	1.42	0.05	-0.39	-0.14	-0.43	-0.27	0	-0.305	0.03	-0.375	0.602358	0.963731	0.500669	0.999971	1	0.904223
Dad1	P61804	0.23	0.4	0.51	0.69	0.28	0.96	0.07	0.52	-0.03	0.47	0.35	-0.08	0.5	1.26	-0.3	1.25	7.85046e-17	-0.28	0.22	1	0.210132	0.558868	1	1	0.915051
Dag1	Q62165	-0.44	-1.28	-1.21	-0.86	-0.74	-1.31	-1.02	-1.28	-0.36	-0.38	-0.71	-0.7	-0.37	-0.98	-0.78	-0.56	-0.14	0.41	0.275	0.590667	0.12014	0.303548	0.999971	1	0.847402
Dagla	Q6WQJ1	-1.4	-0.49	-1.06	-1.13	-0.8	-0.78	-1.57	-1.29	-0.76	-1.45	-1.05	-1.43	-0.1	-1.13	-1.21	-0.9	-0.09	-0.1525	0.185	0.753058	0.57635	0.567515	0.999971	1	0.91816
Daglb	Q91WC9	-0.73	0.37	0.8	0.9	0.4	0.51	0.55	0.85	0.42	0.07	1.01	0.42	1	0.36	0.88	1.02	0.2425	0.145	0.48	0.520887	0.719973	0.237871	0.999971	1	0.833594
Dalrd3	Q6PJN8	1.15	-0.04	0.2	1.2	0.07	0.21	0.14	1.01	-0.51	1.37	-0.07	0.15	-0.85	0.64	0.1	0.8	-0.27	-0.3925	-0.455	0.478523	0.423789	0.337004	0.999971	1	0.858827
Dap	A0A087WRC6	3.31	0.89	0.68	1.92	0.53	1.49	4.64	0.95	4.75	0.84	1.89	-0.12	-0.09	-1.46	0.68	-0.3	0.2025	0.14	-1.9925	0.838074	0.897597	0.0156931	0.999971	1	0.613095
Dap3	G3X9M0	-1.2	-0.58	-0.81	-0.39	-0.52	-0.42	-0.44	-0.67	-0.45	-0.65	-0.83	-0.64	-0.26	-0.13	-0.7	-0.61	0.2325	0.1025	0.32	0.315487	0.653803	0.222427	0.999971	1	0.827753
Dapk1	Q80YE7-2	-0.57	-0.21	-0.52	-0.19	-0.16	-0.18	-0.46	-0.38	-0.44	-0.2	-0.58	-0.72	-0.17	-0.17	-0.66	-0.61	0.0775	-0.1125	-0.03	0.686247	0.580414	0.88933	0.999971	1	0.987681
Dapk3	O54784	0.12	1.04	-0.64	-0.77	1.15	0.68	-0.36	-0.96	0.56	0.37	-0.78	-0.3	0.41	1.36	-1.38	-1.11	0.19	0.025	-0.1175	0.744447	0.958825	0.866114	0.999971	1	0.983462
Dars1	Q922B2	0.08	0.89	0.91	0.88	1.02	0.83	0.84	1.31	1.19	0.59	1.11	1.32	1.01	1.09	1.16	1.55	0.31	0.3625	0.5125	0.247481	0.209796	0.0755753	0.999971	1	0.746958
Dars2	Q8BIP0	-0.78	0.19	-1.61	-1.94	0.07	-0.46	-1.44	-2.21	-0.04	-0.98	-1.53	-1.46	-0.32	-0.81	-2.4	-2.46	0.025	0.0325	-0.4625	0.968436	0.952195	0.489112	0.999971	1	0.898346
Daxx	O35613	-1.82	-1.45	0.05	-0.33	-0.5	-1.68	-0.47	-0.1	-1.11	-2.34	0.29	0.34	-0.65	-0.73	-0.25	0.23	0.2	0.1825	0.5375	0.700928	0.797114	0.266278	0.999971	1	0.842677
Dazap1	Q3UGB5	0.97	2.01	1.53	2.09	1.87	2.21	1.35	2.36	1.95	1.56	1.99	2.14	1.37	2.35	2.19	1.48	0.2975	0.26	0.1975	0.390409	0.389591	0.577817	0.999971	1	0.918581
Dbh	Q64237	-1.43	-0.47	0.01	-0.7	-1.24	-0.29	-0.98	0.21	-1.14	-1.02	-0.42	-0.89	-0.22	-0.74	-1.31	-0.3	0.0725	-0.22	0.005	0.863626	0.51819	0.98944	0.999971	1	0.99925
Dbi	P31786	-0.36	-0.3	0.37	0.1	-0.09	-0.29	-0.22	0.46	-0.21	-0.29	-0.27	0.09	-0.39	0.41	0.47	0.6	0.0125	-0.1225	0.32	0.962213	0.596199	0.29347	0.999971	1	0.847402
Dbn1	Q9QXS6	-1.04	-1.1	-1.36	-1.52	-1.26	-1.02	-0.88	-1.52	-1.01	-1.23	-1.11	-1.27	-1.33	-1.45	-1.34	-1.57	0.085	0.1	-0.1675	0.703372	0.600241	0.39419	0.999971	1	0.871816
Dbn1_1	A0A0R4J1E3	1.05	-0.43	-1.74	-1.4	-1.15	-1.06	-1.79	-1.18	-0.5	0.48	-1.85	-1.62	-1.46	-0.35	-1.07	-1.31	-0.665	-0.2425	-0.4175	0.278033	0.746564	0.501637	0.999971	1	0.904573
Dbndd1	H3BK17	3.06	0.35	-0.53	-0.12	0.15	0.08	-0.41	-0.22	1.68	1.33	0.35	-0.38	0.52	0.32	0.01	-0.2	-0.79	0.055	-0.5275	0.301621	0.948086	0.485617	0.999971	1	0.897386
Dbndd2	Q9CRD4	-2.18	0.19	0.02	-0.4	-0.63	0.93	-1.04	0.64	1.44	0.16	-0.85	0.33	0.95	0.48	-0.48	0.32	0.5675	0.8625	0.91	0.397974	0.210981	0.136376	0.999971	1	0.784948
Dbnl	Q62418	-0.45	-0.7	-0.63	-0.52	-0.52	-0.63	-0.55	-0.16	-0.9	-0.99	-0.53	-0.63	-0.6	-0.74	-0.62	-0.47	0.11	-0.1875	-0.0325	0.562088	0.330245	0.850068	0.999971	1	0.98187
Dbr1	Q923B1	0.52	2.69	2.09	1.87	2.47	2.23	1.56	1.66	2.67	0.84	1.76	1.51	0.52	1.54	1.84	1.61	0.1875	-0.0975	-0.415	0.693568	0.859094	0.420184	0.999971	1	0.87788
Dbt	P53395	-0.96	-0.52	-0.25	-0.37	-0.75	-0.44	-0.41	-0.29	-0.58	-0.88	-0.67	-0.33	-0.47	-0.61	-0.46	-0.46	0.0525	-0.09	0.025	0.815351	0.694717	0.90551	0.999971	1	0.991091
Dcaf1	Q80TR8-4	3.2	2.44	0.89	1.02	1.85	2.23	0.77	0.85	1.64	2.54	-0.04	0.01	1.16	2.26	0.62	0.14	-0.4625	-0.85	-0.8425	0.455377	0.285788	0.221167	0.999971	1	0.8275
Dcaf10	A2AKB9-2	0	0.87	0.42	2.07	1.11	0.58	1.14	1.68	0.68	0.44	1.41	0.89	1	1.08	1.07	1.56	0.2875	0.015	0.3375	0.542673	0.974106	0.44989	0.999971	1	0.885596
Dcaf11	Q91VU6	-0.32	0.07	2.54	1.13	-0.1	-0.14	1.33	2.05	0.14	0.15	1.7	0.73	0.17	-0.03	2.5	2.48	-0.07	-0.175	0.425	0.926119	0.794926	0.620072	0.999971	1	0.929296
Dcaf13	Q6PAC3	-1.37	-1.67	0.34	-0.49	-1.56	-2.51	-0.01	0.17	-1.46	-1.73	-0.24	-0.27	-1.5	-2.01	-1.1	-0.36	-0.18	-0.1275	-0.445	0.800063	0.817919	0.409811	0.999971	1	0.875847
Dcaf5	Q80T85	2.66	3.24	1.11	1.71	3.77	3.56	1.31	1.55	2.91	3.27	1.06	1.07	1.14	1.9	0.75	0.88	0.3675	-0.1025	-1.0125	0.61506	0.881839	0.0703139	0.999971	1	0.735439
Dcaf6	Q9DC22	0.55	0.82	1.09	0.99	1.15	0.58	0.81	0.81	1.07	0.66	0.91	1.24	1.16	0.52	0.43	1.05	-0.025	0.1075	-0.0725	0.907053	0.618781	0.770789	0.999971	1	0.963498
Dcaf7	P61963	0.16	0.13	-0.11	-0.25	0.06	0.25	-0.39	0.13	0.35	0.16	-0.11	-0.04	0.27	0.47	0.23	0.08	0.03	0.1075	0.28	0.889916	0.590349	0.171465	0.999971	1	0.804075
Dcaf8	Q8N7N5	0.73	0.68	1.15	0.89	0.67	0.44	0.94	0.74	0.78	1	1.12	0.55	0.91	0.84	0.99	1.14	-0.165	7.85046e-17	0.1075	0.426019	1	0.577701	0.999971	1	0.918581
Dcakd	Q8BHC4	-0.63	-1.08	-0.61	-1.11	-0.62	-0.9	-0.6	-0.44	-0.47	-0.51	-0.41	-0.22	-0.11	-0.71	-0.48	-0.28	0.2175	0.455	0.4625	0.325468	0.0487083	0.0691416	0.999971	1	0.733937
Dcc	P70211-3	-0.29	-0.76	-0.48	-0.44	-0.36	-0.19	-0.69	-0.37	-0.36	-0.26	-0.56	-0.05	-0.17	-0.02	-0.48	-0.21	0.09	0.185	0.2725	0.655771	0.364611	0.192702	0.999971	1	0.810547
Dchs1	E9PVD3	0.35	-0.84	0.09	0.23	-0.35	-0.52	-0.32	0.04	-0.53	-0.26	-0.2	0.1	-0.46	-0.86	0	0.44	-0.245	-0.18	-0.1775	0.427562	0.560415	0.641047	0.999971	1	0.93301
Dclk1	Q80VB6	-2.21	-1.58	-0.89	-1.97	-2.54	-0.52	-2.4	-2.19	-0.35	0.61	-0.88	-1.14	3.88	-0.64	0.23	0.68	-0.25	1.2225	2.7	0.62615	0.0237203	0.0159255	0.999971	1	0.613095
Dclk1_1	A0A0G2JGQ6	-1.85	0.44	-0.51	-1.96	-0.48	0.18	-0.46	-0.87	0.1	-1.41	0	0.6	2.6	-0.35	-0.04	-1.64	0.5625	0.7925	1.1125	0.331673	0.246953	0.25937	0.999971	1	0.839154
Dclk1_2	Q8CCN4	0.23	0.29	-2.09	-1.41	-0.78	-0.52	-1.63	-2.05	-1.48	-0.94	-1.45	-1.16	0.01	-1.3	-0.64	-0.73	-0.5	-0.5125	0.08	0.437678	0.374432	0.893561	0.999971	1	0.98828
Dclk1_3	H7BX36	-1.05	0.56	0.7	0.44	1.33	1.07	2.01	0.46	2.43	-0.49	2.61	0.99	0.86	-1.04	0.59	-1.03	1.055	1.2225	-0.3175	0.0532694	0.131594	0.598185	0.999971	1	0.92377
Dclk1_4	Q9JLM8	-0.88	-0.8	-0.53	-0.63	-0.59	-0.59	-0.13	-0.29	-0.34	-0.56	-0.01	0.11	0.1	-0.51	-0.17	0.27	0.31	0.51	0.6325	0.144893	0.0398367	0.020397	0.999971	1	0.635388
Dclk2	Q6PGN3-3	0.26	0.71	0.46	0.3	0.65	0.59	0.66	0.54	0.85	0.5	0.58	0.47	0.92	0.42	0.49	0.37	0.1775	0.1675	0.1175	0.343175	0.395979	0.583031	0.999971	1	0.920364
Dcn	P28654	1.26	0.74	0.47	0.33	3.06	0.41	-0.66	-0.43	0.38	1.51	-0.13	1.82	0.04	1.52	0.98	-0.63	-0.105	0.195	-0.2225	0.894043	0.68143	0.648836	0.999971	1	0.933842
Dcp1a	Q91YD3	0.38	0.72	0.68	0.62	0.53	0.61	0.06	0.92	0.37	0.36	0.63	0.89	0.79	0.76	0.9	0.91	-0.07	-0.0375	0.24	0.762262	0.851545	0.192069	0.999971	1	0.810547
Dcp1b	B9EIX0	0.62	1.49	-0.29	-0.03	0.43	0.85	-0.6	0.39	1.15	0.84	-0.53	-0.02	0.16	1.27	0	-0.67	-0.18	-0.0875	-0.2575	0.701913	0.86496	0.624471	0.999971	1	0.930479
Dcp2	Q9CYC6	2	0.87	0.53	0.87	1.04	0.97	2.17	0.58	1.11	1.59	1.12	0.83	0.76	0.25	-0.24	0.49	0.1225	0.095	-0.7525	0.781689	0.787113	0.0704636	0.999971	1	0.735439
Dcps	Q9DAR7	1.82	2.27	3.01	3.66	1.87	1.79	2.83	2.45	1.5	1.79	2.21	2.46	0.87	1.96	2.41	2.68	-0.455	-0.7	-0.71	0.322831	0.134448	0.200081	0.999971	1	0.813352
Dctn1	E9Q586	-1.23	0.09	-1.26	-0.11	-1.5	-0.37	-0.54	-0.5	-0.82	-0.92	-0.14	0.18	-0.3	-0.22	-0.27	0.01	-0.1	0.2025	0.4325	0.812031	0.635413	0.247363	0.999971	1	0.839012
Dctn1_1	E9Q3M3	0.05	-0.19	-0.33	-0.23	-0.29	0.02	-0.22	-0.03	-0.21	0.11	-0.37	-0.4	0.12	-0.04	-0.06	0	0.045	-0.0425	0.18	0.806782	0.829667	0.321804	0.999971	1	0.85548
Dctn2	Q99KJ8	-0.84	-0.26	-0.56	-0.78	0.01	-0.38	-0.03	-0.62	0.15	-0.41	-0.24	0.12	0.62	-0.16	-0.44	-0.51	0.355	0.515	0.4875	0.156032	0.046461	0.130531	0.999971	1	0.784948
Dctn3	Q9Z0Y1	-0.21	-0.14	-0.03	-0.34	-0.12	0.19	-0.26	0.41	0.14	0.19	0.6	0.22	0.44	0.21	0.66	0.71	0.235	0.4675	0.685	0.286886	0.0325071	0.00642485	0.999971	1	0.582714
Dctn4	Q8CBY8-2	-0.39	-0.12	0.33	0.29	-0.13	0.15	-0.03	0.73	-0.11	-0.19	0.49	-0.24	0.19	0.33	0.81	0.56	0.1525	-0.04	0.445	0.582995	0.878841	0.1011	0.999971	1	0.78268
Dctn5	Q9QZB9	0.41	0.31	0.58	1.08	0.29	0.45	0.21	1.28	0.44	0.59	0.79	0.47	0.79	0.72	1.04	1.16	-0.0375	-0.0225	0.3325	0.902409	0.920585	0.18265	0.999971	1	0.808532
Dctn6	D3Z6H3	-1.06	-0.5	-0.39	-0.43	-0.72	-0.3	-0.13	-0.32	-0.26	-0.58	-0.07	-0.19	-0.12	-0.2	-0.53	-0.27	0.2275	0.32	0.315	0.347155	0.183542	0.182203	0.999971	1	0.808532
Dctpp1	Q9QY93	1.42	1.01	1.07	1.56	1.2	0.87	1.16	1.81	1.64	0.32	1.43	1.8	1.82	0.55	1.67	1.67	-0.005	0.0325	0.1625	0.984721	0.926678	0.619517	0.999971	1	0.929296
Dcun1d1	Q9QZ73	-0.13	0.54	0.72	0.16	0.74	0.58	0.63	0.26	0.74	0	0.61	0.72	0.6	0.52	0.88	0.33	0.23	0.195	0.26	0.362817	0.484357	0.315057	0.999971	1	0.852056
Dcun1d2	Q8BZJ7	-0.39	-0.76	-0.73	-0.43	-0.79	-0.77	-0.93	-0.36	-1.2	-1.15	-0.24	-0.33	-0.48	-0.61	-0.36	-0.45	-0.135	-0.1525	0.1025	0.522114	0.598346	0.582404	0.999971	1	0.920364
Dcun1d3	Q8K0V2	0.48	-0.54	-0.21	-0.13	-0.63	-0.24	-0.19	-0.39	-0.48	0.36	-0.32	-0.56	-0.66	-0.57	-0.39	-0.47	-0.2625	-0.15	-0.4225	0.324597	0.624809	0.117788	0.999971	1	0.78268
Dcun1d4	Q8C5X2	3.1	2.1	2.1	1.92	2.13	2.35	1.92	2.44	2.2	2.75	1.6	1.77	1.03	1.96	2.09	1.65	-0.095	-0.225	-0.6225	0.752604	0.539369	0.104371	0.999971	1	0.78268
Dcun1d5	Q9CXV9	-0.21	2.33	1.58	0.99	1.9	1.06	1.23	1.94	1.54	-0.1	1.75	1.21	1.72	1.22	1.2	0.51	0.36	-0.0725	-0.01	0.507291	0.907033	0.985331	0.999971	1	0.99925
Dcx	O88809	1.56	-0.27	-0.41	-0.01	0.29	0.18	0.15	-0.15	1.13	1.57	0.37	1.04	0.79	-0.29	-0.21	0.22	-0.1	0.81	-0.09	0.819468	0.122178	0.852224	0.999971	1	0.98187
Dcxr	Q91X52	0.85	0.26	0.81	0.89	0.33	0.69	0.33	0.26	0.38	0.76	0.49	0.81	0.58	0.66	0.56	1.08	-0.3	-0.0925	0.0175	0.197409	0.677094	0.939497	0.999971	1	0.995869
Dda1	Q9D9Z5	2.08	2.78	1.83	1.71	2.92	3.02	2.6	1.98	3.08	3.16	1.99	2.29	3.91	2.99	2.04	1.79	0.53	0.53	0.5825	0.138442	0.173223	0.264084	0.999971	1	0.842533
Ddah1	Q9CWS0	-0.63	-0.28	-1.32	-1.15	-0.29	-0.91	-0.25	-1.05	0.13	-0.88	-1.23	-1.4	0.17	-1.05	-1.43	-1.79	0.22	-2.35514e-16	-0.18	0.495851	1	0.695638	0.999971	1	0.947174
Ddah2	Q99LD8	-0.66	0.23	-0.09	-0.69	0.12	-0.05	0.22	-0.74	0.84	-0.71	0	0.04	0.69	-0.41	-0.37	-0.77	0.19	0.345	0.0875	0.551232	0.37152	0.815745	0.999971	1	0.974918
Ddb1	Q3U1J4	-0.11	0.69	0.88	0.67	0.49	0.43	0.81	0.5	0.55	-0.08	0.77	0.46	0.04	0.56	0.66	0.7	0.025	-0.1075	-0.0425	0.923118	0.715187	0.880453	0.999971	1	0.985441
Ddc	O88533	0.34	-0.22	-0.93	-0.2	0.24	-0.92	-0.96	-0.35	0.52	0.36	-0.67	-0.17	0.54	0.34	-0.03	-0.8	-0.245	0.2625	0.265	0.515758	0.479842	0.492703	0.999971	1	0.900198
Ddhd1	F8WIJ5	-0.2	-1.07	-0.97	-0.63	-0.99	-0.67	-0.96	-0.91	-0.96	-0.26	-0.77	-1.21	-1.09	-0.93	-0.96	-0.78	-0.165	-0.0825	-0.2225	0.500307	0.777557	0.36638	0.999971	1	0.869526
Ddhd2	Q80Y98	-0.12	-0.04	0.15	-0.05	-0.2	0.09	-0.04	-0.07	-0.25	-0.03	-0.1	-0.43	-0.41	-0.1	-0.19	-0.3	-0.04	-0.1875	-0.235	0.81703	0.310291	0.20368	0.999971	1	0.81617
Ddi2	A2ADY9	-0.05	0.29	0.43	0.36	0.16	0.37	-0.03	0.56	-0.06	0.12	-0.03	0.33	0.41	0.61	0.57	0.61	0.0075	-0.1675	0.2925	0.972028	0.402338	0.145544	0.999971	1	0.791767
Ddn	Q80TS7	0.14	0.03	-0.52	-0.42	-0.28	-0.47	-0.53	-0.16	-0.28	-0.29	-0.45	-0.62	-0.23	-1.29	-1.03	-0.8	-0.1675	-0.2175	-0.645	0.463776	0.33971	0.0505106	0.999971	1	0.722689
Ddost	O54734	-0.26	-0.79	-0.23	-0.43	-0.94	-0.49	0.07	-0.14	-0.83	-0.56	0.03	0.33	-0.82	-0.52	-0.09	0.09	0.0525	0.17	0.0925	0.847822	0.577124	0.727992	0.999971	1	0.956041
Ddr1	Q03146-2	-1.15	-0.6	-0.04	-0.47	-0.33	-1.69	-0.39	-0.08	-0.06	-1.68	0.09	-0.03	0.01	-1.77	-0.03	-0.19	-0.0575	0.145	0.07	0.887868	0.748787	0.877749	0.999971	1	0.985319
Ddrgk1	Q80WW9	2.65	-0.1	-0.17	0.12	0.13	-0.13	1.44	0.59	-0.44	1.74	0.61	0.82	-0.57	-0.82	-0.15	-0.17	-0.1175	0.0575	-1.0525	0.864338	0.937791	0.124515	0.999971	1	0.78268
Ddt	O35215	-0.29	0.93	0.44	0.45	0.7	0.53	0.15	0.38	0.45	-0.63	-0.26	0.52	0.28	0.8	0.35	0.32	0.0575	-0.3625	0.055	0.842546	0.336492	0.85043	0.999971	1	0.98187
Ddx1	Q91VR5	0.13	1.87	1.99	1.61	1.58	1.46	1.8	1.58	1.72	0.89	1.96	2.12	1.34	1.58	1.73	1.68	0.205	0.2725	0.1825	0.62333	0.57197	0.663877	0.999971	1	0.936621
Ddx10	Q80Y44	1.64	-0.77	0.31	0.42	-0.48	-0.42	-0.24	-1.38	-0.13	1.09	-1.38	-2.88	-3.61	-2.36	-0.34	-2.21	-1.03	-1.225	-2.53	0.0710984	0.191155	0.00819181	0.999971	1	0.602121
Ddx17	Q3U741	1.21	2.08	1.88	1.62	2.21	1.53	1.34	1.64	2.01	0.74	1.36	1.81	1.87	1.11	1.41	1.27	-0.0175	-0.2175	-0.2825	0.950201	0.522588	0.310028	0.999971	1	0.847402
Ddx18	Q8K363	1.48	-0.94	-1.48	-1.53	-0.94	-0.97	-1.36	-1.89	-1.13	-0.13	-1.19	-0.88	-1.44	-1.02	-1.18	-1.42	-0.6725	-0.215	-0.6475	0.333235	0.754256	0.33575	0.999971	1	0.858827
Ddx19a	Q61655	-0.36	0.34	-0.19	-0.57	0.63	0.24	-0.19	-0.42	0.58	0.09	-0.06	-0.17	0.62	0.08	-0.42	-0.62	0.26	0.305	0.11	0.409648	0.280345	0.744649	0.999971	1	0.961064
Ddx19b	Q8R3C7	-0.83	-0.58	0.2	-0.14	-0.95	-1.17	0.13	0.35	-0.82	-1.11	0.03	0.86	-1.73	-1.41	0.55	0.65	-0.0725	0.0775	-0.1475	0.86326	0.86883	0.809701	0.999971	1	0.973791
Ddx20	Q9JJY4	0.21	1.19	1.62	1.87	1.19	0.34	1.28	1.9	0.55	0.18	1.65	1.99	1.16	0.44	1.83	2.26	-0.045	-0.13	0.2	0.921278	0.804669	0.691413	0.999971	1	0.946835
Ddx21	Q9JIK5	-0.1	-0.18	-0.53	-0.58	-0.33	-0.5	-0.86	-0.8	-0.51	-0.27	-0.59	-1.2	-0.57	-0.46	-0.76	-0.99	-0.275	-0.295	-0.3475	0.230101	0.266912	0.13397	0.999971	1	0.784948
Ddx23	D3Z0M9	0.97	0.47	1.09	0.49	0.56	0.25	0.77	0.56	0.28	0.47	0.4	0.46	-0.07	0.52	0.69	0.7	-0.22	-0.3525	-0.295	0.353196	0.123506	0.28249	0.999971	1	0.844538
Ddx24	F8WJA0	0.81	0	-0.29	-0.63	0.09	-0.12	-0.56	-0.17	-0.12	0.74	-0.49	-0.59	0	-0.14	-0.84	-0.85	-0.1625	-0.0875	-0.43	0.628884	0.831732	0.264851	0.999971	1	0.842533
Ddx25	Q9QY15	1.16	1.3	0.68	0.82	1.14	1.25	0.63	1.3	1.29	1.48	0.73	1.07	1.42	1.75	0.97	1.09	0.09	0.1525	0.3175	0.711334	0.537289	0.232417	0.999971	1	0.831121
Ddx27	Q921N6	-0.59	-1.23	-1.52	-1.06	-0.89	-1.63	-1.99	-1.75	-1.39	-0.76	-1.17	-1.57	-1.42	-1.38	-1.61	-0.87	-0.465	-0.1225	-0.22	0.160909	0.659728	0.425501	0.999971	1	0.880767
Ddx28	Q9CWT6	1.49	0.62	-0.66	-1.24	-0.91	-0.39	-1.06	-1.06	-0.11	1.19	-1.25	-0.69	0.66	0.23	-0.57	-0.47	-0.9075	-0.2675	-0.09	0.145496	0.716541	0.885017	0.999971	1	0.98711
Ddx39b	Q9Z1N5	-0.03	0.61	0.43	0.6	0.58	0.59	0.5	0.36	0.49	0.29	-0.15	0.42	0.09	0.9	0.44	0.6	0.105	-0.14	0.105	0.61919	0.561155	0.679648	0.999971	1	0.942957
Ddx3x	Q62167	0.07	0.84	0.53	0.48	0.8	0.65	0.42	0.69	0.95	0.14	0.89	0.68	0.78	0.64	0.54	0.74	0.16	0.185	0.195	0.475233	0.48849	0.376402	0.999971	1	0.870465
Ddx3y	Q62095	-1.9	2.89	2.13	-3.72	2.8	-3.61	1.52	-3.03	-2.93	0.52	2.85	-3.06	2.81	-2.01	2.89	-4.1	-0.43	-0.505	0.0475	0.82961	0.791367	0.981907	0.999971	1	0.99925
Ddx41	A0A1S6GWJ4	0.62	1.14	0.44	0.3	0.72	0.76	0.37	0.52	1.04	0.74	0.71	0.74	1.12	1.26	0.43	0.59	-0.0325	0.1825	0.225	0.891562	0.441937	0.440284	0.999971	1	0.883105
Ddx42	Q810A7	2.23	2.46	2.32	2.37	2.45	2.17	1.7	2.13	2.45	2.41	2.3	2.35	1.75	1.84	2.11	2.45	-0.2325	0.0325	-0.3075	0.288711	0.840085	0.174743	0.999971	1	0.808161
Ddx46	Q569Z5	1.86	1.77	1.38	1.23	1.95	1.72	1.35	1.06	1.77	1.87	1.36	1.49	1.33	1.71	1.26	1.31	-0.04	0.0625	-0.1575	0.881494	0.784705	0.490687	0.999971	1	0.898612
Ddx47	F6QKD2	1.12	0.35	-0.02	0.29	-0.08	-0.15	-0.38	0.19	-0.41	0.23	0.52	0.45	-0.59	-0.12	0.03	0.48	-0.54	-0.2375	-0.485	0.0836753	0.469004	0.164904	0.999971	1	0.800215
Ddx5	Q8BTS0	0.28	1.28	1.38	1.02	1.38	1.02	1.09	1.4	1.18	0.24	1.5	1.24	1.2	1.11	1.52	1.14	0.2325	0.05	0.2525	0.41869	0.8902	0.381117	0.999971	1	0.871816
Ddx50	Q99MJ9	0.7	-0.15	-0.52	-0.49	-0.32	0.15	-0.52	-0.69	-0.47	0.75	-0.58	-0.82	0.03	0.12	-0.66	-0.69	-0.23	-0.165	-0.185	0.498381	0.701359	0.602082	0.999971	1	0.924453
Ddx51	Q6P9R1	-0.3	-1.27	-1.41	-1.3	-1.52	-1.18	-1.28	-1.83	-1.3	-0.84	-1.56	-2.08	-1.63	-1.43	-1.99	-1.68	-0.3825	-0.375	-0.6125	0.228486	0.310557	0.0630613	0.999971	1	0.725348
Ddx52	Q8K301	-3.65	-0.95	-1.3	-5.95	-0.12	-2.45	-0.39	-4.45	0.4	-3.94	-0.65	0.2	0.1	-3.58	-3.58	-4.81	1.11	1.965	-0.005	0.425421	0.177957	0.997146	0.999971	1	1
Ddx54	Q8K4L0	0.09	-0.84	-0.56	-1.28	-0.15	-1.47	-0.38	-0.99	-0.8	0.21	-1.5	-1.55	-0.45	-0.3	-1.27	-1.16	-0.1	-0.2625	-0.1475	0.801161	0.579888	0.689661	0.999971	1	0.945805
Ddx55	E9Q9T6	1.98	1.38	0.55	0.36	0.32	0.62	-0.75	0.4	0.3	0.88	-0.11	-0.01	-0.88	0.7	0.17	-0.64	-0.92	-0.8025	-1.23	0.0692139	0.0815499	0.0309643	0.999971	1	0.678474
Ddx56	Q9D0R4	-0.12	0.64	0.02	-0.36	0.54	0.33	-0.07	-0.13	0.54	0.03	-0.34	-0.44	1.06	0.13	-1.13	-0.92	0.1225	-0.0975	-0.26	0.665368	0.75504	0.612423	0.999971	1	0.927335
Ddx58	A2AP29	2.13	2.45	0.52	0.53	2.97	1.8	0.07	-0.23	2.65	1.49	0.4	0.47	3.59	0.92	0.35	-0.7	-0.255	-0.155	-0.3675	0.755774	0.817682	0.696472	0.999971	1	0.947174
Ddx6	P54823	0.79	1.38	1.06	1.15	1.3	1.42	0.86	1.21	1.28	1.15	1.05	1.07	1.05	1.74	1.32	1.36	0.1025	0.0425	0.2725	0.638937	0.825234	0.250728	0.999971	1	0.839012
Decr1	Q9CQ62	0.75	-1.7	-0.5	0.11	-1.66	-1.23	-0.61	0.24	-1.67	0.43	-0.73	-0.7	-2.61	-1.2	-0.59	-0.49	-0.48	-0.3325	-0.8875	0.436921	0.594279	0.195474	0.999971	1	0.811225
[truncated: 7,116 more rows]

## Sheet: GSEA
* GSEA mouse MSigDB canonical pathways: m2.cp.v2023.1.Mm.symbols
*significant pathways (FDR<0.25) are marked in yellow
CX MNK1KO / WT				CX MNK2KO / WT				CX MNKDKO / WT
canonical pathway	NES	NOM p-val	FDR q-val	canonical pathway	NES	NOM p-val	FDR q-val	canonical pathway	NES	NOM p-val	FDR q-val
REACTOME_FORMATION_OF_A_POOL_OF_FREE_40S_SUBUNITS	2.03725	0	0.0158597	REACTOME_FORMATION_OF_A_POOL_OF_FREE_40S_SUBUNITS	1.56559	0.0155564	0.36954	REACTOME_FORMATION_OF_A_POOL_OF_FREE_40S_SUBUNITS	2.03002	0	0.0793908
REACTOME_ACTIVATION_OF_THE_MRNA_UPON_BINDING_OF_THE_CAP_BINDING_COMPLEX_AND_EIFS_AND_SUBSEQUENT_BINDING_TO_43S	1.88045	0.00110193	0.052729	REACTOME_ACTIVATION_OF_THE_MRNA_UPON_BINDING_OF_THE_CAP_BINDING_COMPLEX_AND_EIFS_AND_SUBSEQUENT_BINDING_TO_43S	1.36265	0.0976055	0.686704	REACTOME_ACTIVATION_OF_THE_MRNA_UPON_BINDING_OF_THE_CAP_BINDING_COMPLEX_AND_EIFS_AND_SUBSEQUENT_BINDING_TO_43S	2.04637	0.000405844	0.129565
REACTOME_TRANSLATION	1.69033	0.000336134	0.186555	REACTOME_TRANSLATION	1.39966	0.0233463	0.616157	REACTOME_TRANSLATION	1.84675	0	0.172686
REACTOME_NONSENSE_MEDIATED_DECAY_NMD_INDEPENDENT_OF_THE_EXON_JUNCTION_COMPLEX_EJC	2.00003	0	0.0242378	REACTOME_NONSENSE_MEDIATED_DECAY_NMD_INDEPENDENT_OF_THE_EXON_JUNCTION_COMPLEX_EJC	1.52375	0.0271997	0.445504	REACTOME_NONSENSE_MEDIATED_DECAY_NMD_INDEPENDENT_OF_THE_EXON_JUNCTION_COMPLEX_EJC	1.86447	0.00047081	0.177585
REACTOME_RHO_GTPASES_ACTIVATE_NADPH_OXIDASES	-1.94442	0.00104037	0.370116	REACTOME_RHO_GTPASES_ACTIVATE_NADPH_OXIDASES	-1.87132	0.000770564	0.138072	REACTOME_RHO_GTPASES_ACTIVATE_NADPH_OXIDASES	-1.77925	0.00218103	0.178952
WP_CYTOPLASMIC_RIBOSOMAL_PROTEINS	1.98737	0.000181357	0.0246178	WP_CYTOPLASMIC_RIBOSOMAL_PROTEINS	1.47844	0.0332789	0.505782	WP_CYTOPLASMIC_RIBOSOMAL_PROTEINS	1.8854	0.000448632	0.183386
REACTOME_EUKARYOTIC_TRANSLATION_INITIATION	1.96173	0	0.0270566	REACTOME_EUKARYOTIC_TRANSLATION_INITIATION	1.58699	0.00858283	0.363702	REACTOME_EUKARYOTIC_TRANSLATION_INITIATION	1.90104	0	0.211881
REACTOME_EPIGENETIC_REGULATION_OF_GENE_EXPRESSION	-1.57303	0.0274654	0.437501	REACTOME_EPIGENETIC_REGULATION_OF_GENE_EXPRESSION	-1.10368	0.326811	0.868273	REACTOME_EPIGENETIC_REGULATION_OF_GENE_EXPRESSION	-1.77959	0.00335864	0.237636
REACTOME_PLATELET_AGGREGATION_PLUG_FORMATION	1.27539	0.15758	0.793899	REACTOME_PLATELET_AGGREGATION_PLUG_FORMATION	0.937522	0.529756	0.967623	REACTOME_PLATELET_AGGREGATION_PLUG_FORMATION	-1.73431	0.00444572	0.258368
WP_TGFBETA_SIGNALING_PATHWAY	-1.63026	0.0295226	0.426965	WP_TGFBETA_SIGNALING_PATHWAY	-1.08004	0.363324	0.883869	WP_TGFBETA_SIGNALING_PATHWAY	-1.80179	0.00123324	0.259602
REACTOME_RUNX1_REGULATES_GENES_INVOLVED_IN_MEGAKARYOCYTE_DIFFERENTIATION_AND_PLATELET_FUNCTION	-1.84279	0.0042653	0.503295	REACTOME_RUNX1_REGULATES_GENES_INVOLVED_IN_MEGAKARYOCYTE_DIFFERENTIATION_AND_PLATELET_FUNCTION	-1.53353	0.0431083	0.583698	REACTOME_RUNX1_REGULATES_GENES_INVOLVED_IN_MEGAKARYOCYTE_DIFFERENTIATION_AND_PLATELET_FUNCTION	-1.70599	0.00821874	0.260255
REACTOME_NONHOMOLOGOUS_END_JOINING_NHEJ	-1.79293	0.00712788	0.515077	REACTOME_NONHOMOLOGOUS_END_JOINING_NHEJ	-1.92678	0.000578704	0.123981	REACTOME_NONHOMOLOGOUS_END_JOINING_NHEJ	-1.71584	0.00604961	0.270545
REACTOME_CITRIC_ACID_CYCLE_TCA_CYCLE	1.62188	0.0314394	0.254331	REACTOME_CITRIC_ACID_CYCLE_TCA_CYCLE	1.50609	0.0691733	0.467476	REACTOME_CITRIC_ACID_CYCLE_TCA_CYCLE	1.7645	0.00961258	0.296197
BIOCARTA_VDR_PATHWAY	-1.70266	0.0199957	0.515924	BIOCARTA_VDR_PATHWAY	-1.37036	0.115415	0.680381	BIOCARTA_VDR_PATHWAY	-1.8209	0.00279851	0.390858
REACTOME_FOXO_MEDIATED_TRANSCRIPTION	-0.911089	0.569936	0.952196	REACTOME_FOXO_MEDIATED_TRANSCRIPTION	-1.00846	0.45377	0.991491	REACTOME_FOXO_MEDIATED_TRANSCRIPTION	-1.63594	0.0188235	0.396437
REACTOME_NONSENSE_MEDIATED_DECAY_NMD	1.97281	0	0.0262414	REACTOME_NONSENSE_MEDIATED_DECAY_NMD	1.46745	0.0288049	0.502116	REACTOME_NONSENSE_MEDIATED_DECAY_NMD	1.68971	0.0016538	0.407544
REACTOME_COPI_INDEPENDENT_GOLGI_TO_ER_RETROGRADE_TRAFFIC	1.3119	0.11237	0.713792	REACTOME_COPI_INDEPENDENT_GOLGI_TO_ER_RETROGRADE_TRAFFIC	1.30325	0.136225	0.727944	REACTOME_COPI_INDEPENDENT_GOLGI_TO_ER_RETROGRADE_TRAFFIC	1.70607	0.00760167	0.407662
REACTOME_CHOLESTEROL_BIOSYNTHESIS	1.50879	0.0485419	0.407597	REACTOME_CHOLESTEROL_BIOSYNTHESIS	1.25174	0.196001	0.773661	REACTOME_CHOLESTEROL_BIOSYNTHESIS	1.67322	0.0203715	0.411628
REACTOME_BUTYRATE_RESPONSE_FACTOR_1_BRF1_BINDS_AND_DESTABILIZES_MRNA	0.872135	0.621181	0.980687	REACTOME_BUTYRATE_RESPONSE_FACTOR_1_BRF1_BINDS_AND_DESTABILIZES_MRNA	0.887069	0.593875	1	REACTOME_BUTYRATE_RESPONSE_FACTOR_1_BRF1_BINDS_AND_DESTABILIZES_MRNA	-1.62258	0.0160686	0.412676
REACTOME_DNA_REPAIR	-1.47702	0.0157203	0.508199	REACTOME_DNA_REPAIR	-1.60532	0.00201735	0.705636	REACTOME_DNA_REPAIR	-1.64127	0.000830171	0.416997
REACTOME_DNA_DOUBLE_STRAND_BREAK_REPAIR	-1.63895	0.0115368	0.536297	REACTOME_DNA_DOUBLE_STRAND_BREAK_REPAIR	-1.76441	0.00236035	0.26655	REACTOME_DNA_DOUBLE_STRAND_BREAK_REPAIR	-1.64146	0.00648123	0.468216
REACTOME_POSITIVE_EPIGENETIC_REGULATION_OF_RRNA_EXPRESSION	-1.02317	0.407847	0.869478	REACTOME_POSITIVE_EPIGENETIC_REGULATION_OF_RRNA_EXPRESSION	-0.575264	0.955637	1	REACTOME_POSITIVE_EPIGENETIC_REGULATION_OF_RRNA_EXPRESSION	-1.58139	0.0272312	0.482048
REACTOME_MET_PROMOTES_CELL_MOTILITY	1.45925	0.0714286	0.474245	REACTOME_MET_PROMOTES_CELL_MOTILITY	2.07757	0.00041511	0.00624771	REACTOME_MET_PROMOTES_CELL_MOTILITY	-1.54082	0.0353644	0.485495
WP_CHOLESTEROL_METABOLISM_WITH_BLOCH_AND_KANDUTSCHRUSSELL_PATHWAYS	1.73104	0.00572378	0.144572	WP_CHOLESTEROL_METABOLISM_WITH_BLOCH_AND_KANDUTSCHRUSSELL_PATHWAYS	1.40993	0.0825707	0.59684	WP_CHOLESTEROL_METABOLISM_WITH_BLOCH_AND_KANDUTSCHRUSSELL_PATHWAYS	1.62211	0.015816	0.487879
REACTOME_SIGNALLING_TO_ERKS	0.868639	0.637072	0.982782	REACTOME_SIGNALLING_TO_ERKS	0.998429	0.437461	0.920315	REACTOME_SIGNALLING_TO_ERKS	1.63379	0.0214769	0.492286
REACTOME_KSRP_KHSRP_BINDS_AND_DESTABILIZES_MRNA	-0.888687	0.60818	0.929108	REACTOME_KSRP_KHSRP_BINDS_AND_DESTABILIZES_MRNA	0.883498	0.601854	1	REACTOME_KSRP_KHSRP_BINDS_AND_DESTABILIZES_MRNA	-1.57158	0.0274838	0.493332
REACTOME_COLLAGEN_BIOSYNTHESIS_AND_MODIFYING_ENZYMES	1.70991	0.0115203	0.165944	REACTOME_COLLAGEN_BIOSYNTHESIS_AND_MODIFYING_ENZYMES	2.15411	0.00020982	0.00275126	REACTOME_COLLAGEN_BIOSYNTHESIS_AND_MODIFYING_ENZYMES	-1.55005	0.0320717	0.497267
REACTOME_NUCLEOTIDE_EXCISION_REPAIR	-1.15091	0.22147	0.767604	REACTOME_NUCLEOTIDE_EXCISION_REPAIR	-1.34508	0.0780335	0.713106	REACTOME_NUCLEOTIDE_EXCISION_REPAIR	-1.54232	0.0144795	0.504351
WP_MECHANISMS_ASSOCIATED_WITH_PLURIPOTENCY	-1.42625	0.0125665	0.585766	WP_MECHANISMS_ASSOCIATED_WITH_PLURIPOTENCY	-1.28279	0.0575625	0.7243	WP_MECHANISMS_ASSOCIATED_WITH_PLURIPOTENCY	-1.55438	0.00322284	0.507019
WP_GPCRS_OTHER	-1.35764	0.126527	0.649127	WP_GPCRS_OTHER	-1.41954	0.0886198	0.563831	WP_GPCRS_OTHER	-1.58178	0.0278386	0.517282
REACTOME_TRISTETRAPROLIN_TTP_ZFP36_BINDS_AND_DESTABILIZES_MRNA	0.827057	0.693612	1	REACTOME_TRISTETRAPROLIN_TTP_ZFP36_BINDS_AND_DESTABILIZES_MRNA	0.908755	0.565024	0.98057	REACTOME_TRISTETRAPROLIN_TTP_ZFP36_BINDS_AND_DESTABILIZES_MRNA	-1.55762	0.0325604	0.523402
WP_GPCRS_NONODORANT	-1.32923	0.0869468	0.680599	WP_GPCRS_NONODORANT	-1.29277	0.106651	0.71209	WP_GPCRS_NONODORANT	-1.49242	0.0271563	0.53502
REACTOME_ESTROGEN_DEPENDENT_GENE_EXPRESSION	0.991009	0.46256	0.95541	REACTOME_ESTROGEN_DEPENDENT_GENE_EXPRESSION	-0.916316	0.587396	1	REACTOME_ESTROGEN_DEPENDENT_GENE_EXPRESSION	-1.51613	0.0338673	0.542885
REACTOME_MRNA_SPLICING	-1.50808	0.00386287	0.501424	REACTOME_MRNA_SPLICING	-1.20087	0.108152	0.776795	REACTOME_MRNA_SPLICING	-1.49472	0.00444247	0.545504
WP_DELTANOTCH_SIGNALING_PATHWAY	0.881389	0.641398	0.974014	WP_DELTANOTCH_SIGNALING_PATHWAY	-0.921648	0.584453	1	WP_DELTANOTCH_SIGNALING_PATHWAY	-1.50404	0.0277439	0.548667
REACTOME_ERK_MAPK_TARGETS	1.47383	0.0672237	0.442872	REACTOME_ERK_MAPK_TARGETS	0.756483	0.765931	1	REACTOME_ERK_MAPK_TARGETS	1.59153	0.0343468	0.549716
REACTOME_FORMATION_OF_TC_NER_PRE_INCISION_COMPLEX	-0.815966	0.748063	0.970468	REACTOME_FORMATION_OF_TC_NER_PRE_INCISION_COMPLEX	-1.26436	0.148386	0.733179	REACTOME_FORMATION_OF_TC_NER_PRE_INCISION_COMPLEX	-1.48417	0.0410921	0.55026
REACTOME_PROCESSING_OF_CAPPED_INTRON_CONTAINING_PRE_MRNA	-1.55307	0	0.467231	REACTOME_PROCESSING_OF_CAPPED_INTRON_CONTAINING_PRE_MRNA	-1.34767	0.0182297	0.71995	REACTOME_PROCESSING_OF_CAPPED_INTRON_CONTAINING_PRE_MRNA	-1.50788	0.00194175	0.5555
REACTOME_RUNX1_INTERACTS_WITH_CO_FACTORS_WHOSE_PRECISE_EFFECT_ON_RUNX1_TARGETS_IS_NOT_KNOWN	-1.16177	0.25798	0.741172	REACTOME_RUNX1_INTERACTS_WITH_CO_FACTORS_WHOSE_PRECISE_EFFECT_ON_RUNX1_TARGETS_IS_NOT_KNOWN	-1.51454	0.0413598	0.592172	REACTOME_RUNX1_INTERACTS_WITH_CO_FACTORS_WHOSE_PRECISE_EFFECT_ON_RUNX1_TARGETS_IS_NOT_KNOWN	-1.51889	0.0431751	0.555726
WP_DYSREGULATED_MIRNA_TARGETING_IN_INSULINPI3KAKT_SIGNALING	1.36084	0.117365	0.670638	WP_DYSREGULATED_MIRNA_TARGETING_IN_INSULINPI3KAKT_SIGNALING	1.59096	0.0449697	0.365658	WP_DYSREGULATED_MIRNA_TARGETING_IN_INSULINPI3KAKT_SIGNALING	-1.58242	0.0287506	0.557149
REACTOME_DUAL_INCISION_IN_TC_NER	-1.19574	0.20943	0.742141	REACTOME_DUAL_INCISION_IN_TC_NER	-1.46153	0.0466926	0.521242	REACTOME_DUAL_INCISION_IN_TC_NER	-1.49639	0.0407991	0.560205
REACTOME_HSF1_DEPENDENT_TRANSACTIVATION	1.02282	0.419508	0.959538	REACTOME_HSF1_DEPENDENT_TRANSACTIVATION	-1.3424	0.12234	0.707231	REACTOME_HSF1_DEPENDENT_TRANSACTIVATION	-1.47508	0.0535194	0.569726
REACTOME_COLLAGEN_FORMATION	1.68549	0.0164804	0.185732	REACTOME_COLLAGEN_FORMATION	2.14701	0.000412967	0.00284294	REACTOME_COLLAGEN_FORMATION	-1.46736	0.05544	0.583978
REACTOME_COLLAGEN_DEGRADATION	1.75799	0.00889478	0.118669	REACTOME_COLLAGEN_DEGRADATION	2.10213	0.000422119	0.00472433	REACTOME_COLLAGEN_DEGRADATION	-1.45781	0.0659392	0.606696
REACTOME_CHROMATIN_MODIFYING_ENZYMES	-1.14453	0.214732	0.770889	REACTOME_CHROMATIN_MODIFYING_ENZYMES	-1.1612	0.20525	0.819015	REACTOME_CHROMATIN_MODIFYING_ENZYMES	-1.40092	0.0415678	0.623161
REACTOME_HDACS_DEACETYLATE_HISTONES	-1.3618	0.120905	0.651951	REACTOME_HDACS_DEACETYLATE_HISTONES	-0.77756	0.770366	1	REACTOME_HDACS_DEACETYLATE_HISTONES	-1.40301	0.0934506	0.628602
REACTOME_MRNA_DECAY_BY_3_TO_5_EXORIBONUCLEASE	0.84861	0.666729	1	REACTOME_MRNA_DECAY_BY_3_TO_5_EXORIBONUCLEASE	-0.933559	0.554119	1	REACTOME_MRNA_DECAY_BY_3_TO_5_EXORIBONUCLEASE	-1.40599	0.0927028	0.630392
REACTOME_ASSEMBLY_OF_COLLAGEN_FIBRILS_AND_OTHER_MULTIMERIC_STRUCTURES	1.91743	0.00189036	0.0375006	REACTOME_ASSEMBLY_OF_COLLAGEN_FIBRILS_AND_OTHER_MULTIMERIC_STRUCTURES	2.23117	0	0.00105822	REACTOME_ASSEMBLY_OF_COLLAGEN_FIBRILS_AND_OTHER_MULTIMERIC_STRUCTURES	-1.37079	0.112001	0.631327
REACTOME_SUMOYLATION_OF_TRANSCRIPTION_COFACTORS	-1.06995	0.352866	0.809408	REACTOME_SUMOYLATION_OF_TRANSCRIPTION_COFACTORS	-1.14634	0.274707	0.812621	REACTOME_SUMOYLATION_OF_TRANSCRIPTION_COFACTORS	-1.41625	0.0819302	0.63219
REACTOME_TRANSPORT_OF_MATURE_TRANSCRIPT_TO_CYTOPLASM	-0.911883	0.620903	0.955492	REACTOME_TRANSPORT_OF_MATURE_TRANSCRIPT_TO_CYTOPLASM	-0.930289	0.579411	1	REACTOME_TRANSPORT_OF_MATURE_TRANSCRIPT_TO_CYTOPLASM	-1.38488	0.0509635	0.63577
REACTOME_REGULATION_OF_TP53_ACTIVITY_THROUGH_ACETYLATION	-0.907798	0.583388	0.945102	REACTOME_REGULATION_OF_TP53_ACTIVITY_THROUGH_ACETYLATION	0.724047	0.834716	1	REACTOME_REGULATION_OF_TP53_ACTIVITY_THROUGH_ACETYLATION	-1.40798	0.0812472	0.636926
REACTOME_G2_M_DNA_DAMAGE_CHECKPOINT	-1.70844	0.0141661	0.594058	REACTOME_G2_M_DNA_DAMAGE_CHECKPOINT	-1.50397	0.0475369	0.517898	REACTOME_G2_M_DNA_DAMAGE_CHECKPOINT	-1.37187	0.10079	0.638862
REACTOME_GPVI_MEDIATED_ACTIVATION_CASCADE	0.805593	0.735919	0.997564	REACTOME_GPVI_MEDIATED_ACTIVATION_CASCADE	0.921974	0.547473	0.981586	REACTOME_GPVI_MEDIATED_ACTIVATION_CASCADE	-1.41058	0.0776874	0.641128
REACTOME_SIGNALING_BY_NOTCH	-0.662403	0.896649	1	REACTOME_SIGNALING_BY_NOTCH	-1.02468	0.428625	0.9559	REACTOME_SIGNALING_BY_NOTCH	-1.38027	0.106582	0.641788
REACTOME_CELLULAR_RESPONSE_TO_HEAT_STRESS	-0.733571	0.9317	1	REACTOME_CELLULAR_RESPONSE_TO_HEAT_STRESS	-0.90958	0.627531	1	REACTOME_CELLULAR_RESPONSE_TO_HEAT_STRESS	-1.39276	0.0463651	0.643235
REACTOME_PROCESSING_OF_DNA_DOUBLE_STRAND_BREAK_ENDS	-1.53492	0.0445629	0.46941	REACTOME_PROCESSING_OF_DNA_DOUBLE_STRAND_BREAK_ENDS	-1.44126	0.0661014	0.537634	REACTOME_PROCESSING_OF_DNA_DOUBLE_STRAND_BREAK_ENDS	-1.37674	0.0975978	0.643604
WP_NEURAL_CREST_DIFFERENTIATION	-1.00441	0.43353	0.889533	WP_NEURAL_CREST_DIFFERENTIATION	-1.19882	0.212139	0.765273	WP_NEURAL_CREST_DIFFERENTIATION	-1.38902	0.0838492	0.645231
BIOCARTA_HER2_PATHWAY	-0.837688	0.671119	0.965593	BIOCARTA_HER2_PATHWAY	0.397209	0.997703	1	BIOCARTA_HER2_PATHWAY	-1.38547	0.103781	0.646556
REACTOME_DEGRADATION_OF_THE_EXTRACELLULAR_MATRIX	1.78937	0.00523466	0.0982497	REACTOME_DEGRADATION_OF_THE_EXTRACELLULAR_MATRIX	2.27674	0	0.000925458	REACTOME_DEGRADATION_OF_THE_EXTRACELLULAR_MATRIX	-1.4164	0.0660377	0.647726
REACTOME_INTEGRIN_SIGNALING	1.06383	0.37085	1	REACTOME_INTEGRIN_SIGNALING	-0.835401	0.703838	1	REACTOME_INTEGRIN_SIGNALING	-1.37251	0.101376	0.648496
REACTOME_RAC3_GTPASE_CYCLE	-0.653241	0.981053	1	REACTOME_RAC3_GTPASE_CYCLE	1.35579	0.0814188	0.697161	REACTOME_RAC3_GTPASE_CYCLE	-1.43423	0.0365436	0.656252
REACTOME_INTEGRIN_CELL_SURFACE_INTERACTIONS	2.09731	0	0.027884	REACTOME_INTEGRIN_CELL_SURFACE_INTERACTIONS	2.20224	0	0.00124314	REACTOME_INTEGRIN_CELL_SURFACE_INTERACTIONS	-1.42902	0.0613385	0.661248
REACTOME_TRANSCRIPTION_COUPLED_NUCLEOTIDE_EXCISION_REPAIR_TC_NER	-1.01797	0.410766	0.872711	REACTOME_TRANSCRIPTION_COUPLED_NUCLEOTIDE_EXCISION_REPAIR_TC_NER	-1.2564	0.141655	0.73976	REACTOME_TRANSCRIPTION_COUPLED_NUCLEOTIDE_EXCISION_REPAIR_TC_NER	-1.4166	0.0592325	0.663905
REACTOME_IMMUNOREGULATORY_INTERACTIONS_BETWEEN_A_LYMPHOID_AND_A_NON_LYMPHOID_CELL	0.914162	0.577978	0.955271	REACTOME_IMMUNOREGULATORY_INTERACTIONS_BETWEEN_A_LYMPHOID_AND_A_NON_LYMPHOID_CELL	1.0902	0.337202	0.882776	REACTOME_IMMUNOREGULATORY_INTERACTIONS_BETWEEN_A_LYMPHOID_AND_A_NON_LYMPHOID_CELL	-1.43669	0.0678324	0.664515
WP_FIBRIN_COMPLEMENT_RECEPTOR_3_SIGNALING_PATHWAY	0.656221	0.915969	1	WP_FIBRIN_COMPLEMENT_RECEPTOR_3_SIGNALING_PATHWAY	-1.16453	0.260836	0.816041	WP_FIBRIN_COMPLEMENT_RECEPTOR_3_SIGNALING_PATHWAY	-1.35891	0.105576	0.668288
REACTOME_CYTOPROTECTION_BY_HMOX1	0.789522	0.797688	1	REACTOME_CYTOPROTECTION_BY_HMOX1	-1.64372	0.00997124	0.707988	REACTOME_CYTOPROTECTION_BY_HMOX1	-1.42334	0.0581894	0.668737
REACTOME_DNA_DOUBLE_STRAND_BREAK_RESPONSE	-1.13748	0.278019	0.776857	REACTOME_DNA_DOUBLE_STRAND_BREAK_RESPONSE	-1.39246	0.0887175	0.629122	REACTOME_DNA_DOUBLE_STRAND_BREAK_RESPONSE	-1.41882	0.0761256	0.671393
REACTOME_NON_INTEGRIN_MEMBRANE_ECM_INTERACTIONS	1.52113	0.0497362	0.406799	REACTOME_NON_INTEGRIN_MEMBRANE_ECM_INTERACTIONS	2.09179	0.000209424	0.00530403	REACTOME_NON_INTEGRIN_MEMBRANE_ECM_INTERACTIONS	-1.43936	0.0764361	0.67216
REACTOME_SUMOYLATION_OF_CHROMATIN_ORGANIZATION_PROTEINS	-1.14318	0.248342	0.766645	REACTOME_SUMOYLATION_OF_CHROMATIN_ORGANIZATION_PROTEINS	-1.29671	0.126174	0.709965	REACTOME_SUMOYLATION_OF_CHROMATIN_ORGANIZATION_PROTEINS	-1.35369	0.0948025	0.677885
WP_GLUTATHIONE_AND_ONECARBON_METABOLISM	-1.39022	0.0947594	0.627407	WP_GLUTATHIONE_AND_ONECARBON_METABOLISM	-0.928035	0.567536	1	WP_GLUTATHIONE_AND_ONECARBON_METABOLISM	-1.33525	0.123926	0.70788
REACTOME_ACTIVATION_OF_G_PROTEIN_GATED_POTASSIUM_CHANNELS	-1.63329	0.0238405	0.456218	REACTOME_ACTIVATION_OF_G_PROTEIN_GATED_POTASSIUM_CHANNELS	-1.57171	0.0276917	0.724862	REACTOME_ACTIVATION_OF_G_PROTEIN_GATED_POTASSIUM_CHANNELS	-1.32953	0.128767	0.708635
WP_NOTCH_SIGNALING_PATHWAY	0.758008	0.792992	1	WP_NOTCH_SIGNALING_PATHWAY	-1.28976	0.162662	0.710657	WP_NOTCH_SIGNALING_PATHWAY	-1.33717	0.132438	0.711553
REACTOME_REGULATION_OF_TP53_ACTIVITY_THROUGH_PHOSPHORYLATION	-1.25538	0.152962	0.720221	REACTOME_REGULATION_OF_TP53_ACTIVITY_THROUGH_PHOSPHORYLATION	-1.35452	0.0936293	0.709418	REACTOME_REGULATION_OF_TP53_ACTIVITY_THROUGH_PHOSPHORYLATION	-1.33045	0.111266	0.716352
REACTOME_CYTOSOLIC_SENSORS_OF_PATHOGEN_ASSOCIATED_DNA	-1.61402	0.0306472	0.439745	REACTOME_CYTOSOLIC_SENSORS_OF_PATHOGEN_ASSOCIATED_DNA	-1.09834	0.342569	0.864042	REACTOME_CYTOSOLIC_SENSORS_OF_PATHOGEN_ASSOCIATED_DNA	-1.32483	0.142045	0.71712
REACTOME_HOMOLOGY_DIRECTED_REPAIR	-1.59146	0.0270506	0.441366	REACTOME_HOMOLOGY_DIRECTED_REPAIR	-1.33087	0.114916	0.705276	REACTOME_HOMOLOGY_DIRECTED_REPAIR	-1.33774	0.117698	0.721447
REACTOME_CARGO_CONCENTRATION_IN_THE_ER	1.1475	0.278679	0.97	REACTOME_CARGO_CONCENTRATION_IN_THE_ER	-1.22357	0.205633	0.752916	REACTOME_CARGO_CONCENTRATION_IN_THE_ER	1.51241	0.0408537	0.727361
REACTOME_RAC1_GTPASE_CYCLE	-0.897535	0.701461	0.926149	REACTOME_RAC1_GTPASE_CYCLE	0.87673	0.70664	1	REACTOME_RAC1_GTPASE_CYCLE	-1.33875	0.0550897	0.729685
REACTOME_SYNTHESIS_OF_ACTIVE_UBIQUITIN_ROLES_OF_E1_AND_E2_ENZYMES	0.974385	0.489646	0.951464	REACTOME_SYNTHESIS_OF_ACTIVE_UBIQUITIN_ROLES_OF_E1_AND_E2_ENZYMES	0.974145	0.47902	0.936369	REACTOME_SYNTHESIS_OF_ACTIVE_UBIQUITIN_ROLES_OF_E1_AND_E2_ENZYMES	1.40323	0.0850166	0.741913
REACTOME_RNA_POLYMERASE_II_TRANSCRIPTION_TERMINATION	-0.890451	0.6404	0.939647	REACTOME_RNA_POLYMERASE_II_TRANSCRIPTION_TERMINATION	-1.15277	0.235709	0.814635	REACTOME_RNA_POLYMERASE_II_TRANSCRIPTION_TERMINATION	-1.31563	0.0999468	0.74465
BIOCARTA_ERK_PATHWAY	1.27162	0.175845	0.778851	BIOCARTA_ERK_PATHWAY	-0.693895	0.859133	1	BIOCARTA_ERK_PATHWAY	1.41501	0.0923505	0.747636
REACTOME_ASPARAGINE_N_LINKED_GLYCOSYLATION	1.51726	0.00317195	0.406266	REACTOME_ASPARAGINE_N_LINKED_GLYCOSYLATION	1.01277	0.412723	0.906119	REACTOME_ASPARAGINE_N_LINKED_GLYCOSYLATION	1.4076	0.00861141	0.75062
REACTOME_INSULIN_RECEPTOR_RECYCLING	1.08362	0.352425	0.996916	REACTOME_INSULIN_RECEPTOR_RECYCLING	0.594172	0.943273	1	REACTOME_INSULIN_RECEPTOR_RECYCLING	1.51608	0.0546852	0.759404
REACTOME_NUCLEAR_EVENTS_KINASE_AND_TRANSCRIPTION_FACTOR_ACTIVATION	1.11557	0.317382	0.986856	REACTOME_NUCLEAR_EVENTS_KINASE_AND_TRANSCRIPTION_FACTOR_ACTIVATION	0.668393	0.882097	1	REACTOME_NUCLEAR_EVENTS_KINASE_AND_TRANSCRIPTION_FACTOR_ACTIVATION	1.41678	0.0827348	0.768872
REACTOME_PEPTIDE_LIGAND_BINDING_RECEPTORS	1.3916	0.0740538	0.641587	REACTOME_PEPTIDE_LIGAND_BINDING_RECEPTORS	1.29	0.140494	0.731727	REACTOME_PEPTIDE_LIGAND_BINDING_RECEPTORS	1.38985	0.0640177	0.769489
REACTOME_METABOLISM_OF_FAT_SOLUBLE_VITAMINS	-1.22635	0.190538	0.747138	REACTOME_METABOLISM_OF_FAT_SOLUBLE_VITAMINS	-1.36744	0.10506	0.67435	REACTOME_METABOLISM_OF_FAT_SOLUBLE_VITAMINS	-1.30721	0.150534	0.769869
REACTOME_NOREPINEPHRINE_NEUROTRANSMITTER_RELEASE_CYCLE	0.647122	0.903317	1	REACTOME_NOREPINEPHRINE_NEUROTRANSMITTER_RELEASE_CYCLE	0.941905	0.512858	0.963619	REACTOME_NOREPINEPHRINE_NEUROTRANSMITTER_RELEASE_CYCLE	-1.30416	0.163421	0.771476
WP_FATTY_ACID_BIOSYNTHESIS	-1.07845	0.346969	0.796465	WP_FATTY_ACID_BIOSYNTHESIS	-0.923924	0.568898	1	WP_FATTY_ACID_BIOSYNTHESIS	-1.30103	0.16016	0.773203
REACTOME_DNA_REPLICATION_PRE_INITIATION	1.00935	0.433448	0.965452	REACTOME_DNA_REPLICATION_PRE_INITIATION	1.20259	0.191596	0.832159	REACTOME_DNA_REPLICATION_PRE_INITIATION	1.42116	0.038623	0.781075
REACTOME_DEADENYLATION_DEPENDENT_MRNA_DECAY	-1.11759	0.272748	0.808533	REACTOME_DEADENYLATION_DEPENDENT_MRNA_DECAY	-0.884782	0.659671	1	REACTOME_DEADENYLATION_DEPENDENT_MRNA_DECAY	-1.28211	0.130272	0.787927
REACTOME_MITOCHONDRIAL_TRANSLATION	0.834356	0.778549	0.998819	REACTOME_MITOCHONDRIAL_TRANSLATION	0.807184	0.803061	1	REACTOME_MITOCHONDRIAL_TRANSLATION	1.42591	0.0253099	0.793241
REACTOME_ASSEMBLY_OF_THE_PRE_REPLICATIVE_COMPLEX	0.992597	0.462943	0.954775	REACTOME_ASSEMBLY_OF_THE_PRE_REPLICATIVE_COMPLEX	1.16188	0.23762	0.87351	REACTOME_ASSEMBLY_OF_THE_PRE_REPLICATIVE_COMPLEX	1.37751	0.0495698	0.794255
REACTOME_PHASE_II_CONJUGATION_OF_COMPOUNDS	1.63778	0.0111131	0.24161	REACTOME_PHASE_II_CONJUGATION_OF_COMPOUNDS	0.976545	0.465988	0.943385	REACTOME_PHASE_II_CONJUGATION_OF_COMPOUNDS	1.52006	0.0185409	0.795124
REACTOME_DDX58_IFIH1_MEDIATED_INDUCTION_OF_INTERFERON_ALPHA_BETA	-0.946296	0.522426	0.910915	REACTOME_DDX58_IFIH1_MEDIATED_INDUCTION_OF_INTERFERON_ALPHA_BETA	-0.886268	0.613444	1	REACTOME_DDX58_IFIH1_MEDIATED_INDUCTION_OF_INTERFERON_ALPHA_BETA	-1.29056	0.160396	0.79559
REACTOME_ER_TO_GOLGI_ANTEROGRADE_TRANSPORT	1.40518	0.0244828	0.604608	REACTOME_ER_TO_GOLGI_ANTEROGRADE_TRANSPORT	1.0785	0.305479	0.878339	REACTOME_ER_TO_GOLGI_ANTEROGRADE_TRANSPORT	1.43289	0.00674764	0.797418
REACTOME_INWARDLY_RECTIFYING_K_CHANNELS	-1.68494	0.0177123	0.502986	REACTOME_INWARDLY_RECTIFYING_K_CHANNELS	-1.53444	0.0346955	0.621212	REACTOME_INWARDLY_RECTIFYING_K_CHANNELS	-1.28231	0.167913	0.797962
REACTOME_CD209_DC_SIGN_SIGNALING	-0.783183	0.748886	0.987325	REACTOME_CD209_DC_SIGN_SIGNALING	0.54207	0.963991	1	REACTOME_CD209_DC_SIGN_SIGNALING	-1.28414	0.172304	0.801016
BIOCARTA_TNFR1_PATHWAY	-1.24197	0.193281	0.741264	BIOCARTA_TNFR1_PATHWAY	0.70218	0.837832	1	BIOCARTA_TNFR1_PATHWAY	-1.25428	0.198669	0.803625
REACTOME_REGULATION_OF_TP53_ACTIVITY	-1.06988	0.319917	0.802622	REACTOME_REGULATION_OF_TP53_ACTIVITY	-1.1209	0.257453	0.838305	REACTOME_REGULATION_OF_TP53_ACTIVITY	-1.29138	0.103266	0.803738
REACTOME_GOLGI_ASSOCIATED_VESICLE_BIOGENESIS	0.810823	0.778224	1	REACTOME_GOLGI_ASSOCIATED_VESICLE_BIOGENESIS	0.682339	0.923544	1	REACTOME_GOLGI_ASSOCIATED_VESICLE_BIOGENESIS	-1.24489	0.171251	0.804692
REACTOME_TRANSPORT_OF_BILE_SALTS_AND_ORGANIC_ACIDS_METAL_IONS_AND_AMINE_COMPOUNDS	-1.59487	0.0257511	0.462409	REACTOME_TRANSPORT_OF_BILE_SALTS_AND_ORGANIC_ACIDS_METAL_IONS_AND_AMINE_COMPOUNDS	-1.48558	0.0391665	0.538562	REACTOME_TRANSPORT_OF_BILE_SALTS_AND_ORGANIC_ACIDS_METAL_IONS_AND_AMINE_COMPOUNDS	-1.28539	0.147974	0.806838
REACTOME_DEACTIVATION_OF_THE_BETA_CATENIN_TRANSACTIVATING_COMPLEX	-0.863228	0.644383	0.958959	REACTOME_DEACTIVATION_OF_THE_BETA_CATENIN_TRANSACTIVATING_COMPLEX	-1.38739	0.0991044	0.631184	REACTOME_DEACTIVATION_OF_THE_BETA_CATENIN_TRANSACTIVATING_COMPLEX	-1.25576	0.195372	0.807293
REACTOME_TRANSCRIPTIONAL_REGULATION_BY_RUNX1	-1.149	0.208411	0.765125	REACTOME_TRANSCRIPTIONAL_REGULATION_BY_RUNX1	-1.22678	0.133936	0.761698	REACTOME_TRANSCRIPTIONAL_REGULATION_BY_RUNX1	-1.24578	0.136464	0.810479
REACTOME_INTRINSIC_PATHWAY_FOR_APOPTOSIS	0.828887	0.721933	1	REACTOME_INTRINSIC_PATHWAY_FOR_APOPTOSIS	0.745588	0.82678	1	REACTOME_INTRINSIC_PATHWAY_FOR_APOPTOSIS	1.46396	0.057479	0.810967
REACTOME_DRUG_ADME	0.919905	0.578529	0.949912	REACTOME_DRUG_ADME	-0.954846	0.532422	1	REACTOME_DRUG_ADME	-1.23658	0.181793	0.811462
BIOCARTA_P38MAPK_PATHWAY	-0.952243	0.510117	0.910216	BIOCARTA_P38MAPK_PATHWAY	-1.07996	0.356114	0.876832	BIOCARTA_P38MAPK_PATHWAY	-1.25933	0.190674	0.812173
WP_MICROGLIA_PATHOGEN_PHAGOCYTOSIS_PATHWAY	-1.52935	0.0420511	0.46239	WP_MICROGLIA_PATHOGEN_PHAGOCYTOSIS_PATHWAY	-0.851555	0.676973	1	WP_MICROGLIA_PATHOGEN_PHAGOCYTOSIS_PATHWAY	-1.24958	0.187708	0.813786
REACTOME_FLT3_SIGNALING	0.726555	0.821632	1	REACTOME_FLT3_SIGNALING	-1.13441	0.307105	0.814526	REACTOME_FLT3_SIGNALING	-1.26123	0.19863	0.81428
REACTOME_ECM_PROTEOGLYCANS	1.93678	0	0.0326472	REACTOME_ECM_PROTEOGLYCANS	2.16413	0.000205508	0.00255728	REACTOME_ECM_PROTEOGLYCANS	-1.25612	0.181316	0.815648
REACTOME_NCAM_SIGNALING_FOR_NEURITE_OUT_GROWTH	1.55138	0.0338537	0.360326	REACTOME_NCAM_SIGNALING_FOR_NEURITE_OUT_GROWTH	2.11059	0	0.00449381	REACTOME_NCAM_SIGNALING_FOR_NEURITE_OUT_GROWTH	-1.23107	0.213746	0.816219
REACTOME_SUMOYLATION_OF_RNA_BINDING_PROTEINS	-1.2825	0.134531	0.720701	REACTOME_SUMOYLATION_OF_RNA_BINDING_PROTEINS	-1.31441	0.117693	0.669963	REACTOME_SUMOYLATION_OF_RNA_BINDING_PROTEINS	-1.23974	0.185299	0.816787
WP_OXIDATIVE_STRESS_AND_REDOX_PATHWAY	-1.26792	0.129069	0.716126	WP_OXIDATIVE_STRESS_AND_REDOX_PATHWAY	-1.5583	0.0117763	0.724388	WP_OXIDATIVE_STRESS_AND_REDOX_PATHWAY	-1.24636	0.153786	0.817591
REACTOME_GABA_SYNTHESIS_RELEASE_REUPTAKE_AND_DEGRADATION	0.710563	0.850347	1	REACTOME_GABA_SYNTHESIS_RELEASE_REUPTAKE_AND_DEGRADATION	0.975925	0.479038	0.935768	REACTOME_GABA_SYNTHESIS_RELEASE_REUPTAKE_AND_DEGRADATION	-1.22822	0.218415	0.818669
REACTOME_CHROMOSOME_MAINTENANCE	-1.36614	0.0960187	0.672709	REACTOME_CHROMOSOME_MAINTENANCE	-0.85865	0.681493	1	REACTOME_CHROMOSOME_MAINTENANCE	-1.23693	0.187799	0.819091
REACTOME_SENSORY_PERCEPTION	-1.21915	0.188271	0.73758	REACTOME_SENSORY_PERCEPTION	-1.05021	0.379777	0.929765	REACTOME_SENSORY_PERCEPTION	-1.23212	0.192865	0.820781
WP_KIT_RECEPTOR_SIGNALING_PATHWAY	-1.04389	0.382108	0.843926	WP_KIT_RECEPTOR_SIGNALING_PATHWAY	-0.812869	0.772445	1	WP_KIT_RECEPTOR_SIGNALING_PATHWAY	-1.22552	0.189312	0.820981
REACTOME_DOWNREGULATION_OF_ERBB2_SIGNALING	-0.898675	0.592003	0.933305	REACTOME_DOWNREGULATION_OF_ERBB2_SIGNALING	-1.09136	0.344886	0.86608	REACTOME_DOWNREGULATION_OF_ERBB2_SIGNALING	-1.22286	0.225755	0.823146
REACTOME_RAC2_GTPASE_CYCLE	-0.852353	0.73049	0.955781	REACTOME_RAC2_GTPASE_CYCLE	1.05321	0.361491	0.8744	REACTOME_RAC2_GTPASE_CYCLE	-1.26155	0.13394	0.823283
REACTOME_BIOLOGICAL_OXIDATIONS	1.87827	0.000353357	0.0498239	REACTOME_BIOLOGICAL_OXIDATIONS	1.42518	0.0465907	0.574811	REACTOME_BIOLOGICAL_OXIDATIONS	1.48057	0.0124797	0.824744
REACTOME_SUMOYLATION_OF_UBIQUITINYLATION_PROTEINS	-1.29199	0.140827	0.716772	REACTOME_SUMOYLATION_OF_UBIQUITINYLATION_PROTEINS	-1.0548	0.374329	0.943179	REACTOME_SUMOYLATION_OF_UBIQUITINYLATION_PROTEINS	-1.27019	0.160722	0.828817
WP_P38_MAPK_SIGNALING_PATHWAY	-1.11005	0.308212	0.808571	WP_P38_MAPK_SIGNALING_PATHWAY	-1.25452	0.180312	0.713652	WP_P38_MAPK_SIGNALING_PATHWAY	-1.2618	0.180668	0.832842
REACTOME_REGULATION_OF_HSF1_MEDIATED_HEAT_SHOCK_RESPONSE	-0.938271	0.548181	0.917813	REACTOME_REGULATION_OF_HSF1_MEDIATED_HEAT_SHOCK_RESPONSE	-0.930623	0.57154	1	REACTOME_REGULATION_OF_HSF1_MEDIATED_HEAT_SHOCK_RESPONSE	-1.26673	0.142538	0.832943
REACTOME_CDK_MEDIATED_PHOSPHORYLATION_AND_REMOVAL_OF_CDC6	1.07892	0.324504	1	REACTOME_CDK_MEDIATED_PHOSPHORYLATION_AND_REMOVAL_OF_CDC6	1.32111	0.111601	0.701251	REACTOME_CDK_MEDIATED_PHOSPHORYLATION_AND_REMOVAL_OF_CDC6	1.433	0.038099	0.83313
REACTOME_SEROTONIN_NEUROTRANSMITTER_RELEASE_CYCLE	-0.524088	0.981068	1	REACTOME_SEROTONIN_NEUROTRANSMITTER_RELEASE_CYCLE	0.754813	0.775187	1	REACTOME_SEROTONIN_NEUROTRANSMITTER_RELEASE_CYCLE	-1.26241	0.192367	0.841061
REACTOME_PYRUVATE_METABOLISM_AND_CITRIC_ACID_TCA_CYCLE	1.27522	0.145354	0.784405	REACTOME_PYRUVATE_METABOLISM_AND_CITRIC_ACID_TCA_CYCLE	1.24728	0.178212	0.779364	REACTOME_PYRUVATE_METABOLISM_AND_CITRIC_ACID_TCA_CYCLE	1.46662	0.0380435	0.843386
BIOCARTA_EIF4_PATHWAY	1.48137	0.0594656	0.431458	BIOCARTA_EIF4_PATHWAY	0.919152	0.541771	0.976761	BIOCARTA_EIF4_PATHWAY	1.35917	0.113256	0.845941
REACTOME_HSP90_CHAPERONE_CYCLE_FOR_STEROID_HORMONE_RECEPTORS_SHR_IN_THE_PRESENCE_OF_LIGAND	1.38164	0.0754513	0.653672	REACTOME_HSP90_CHAPERONE_CYCLE_FOR_STEROID_HORMONE_RECEPTORS_SHR_IN_THE_PRESENCE_OF_LIGAND	1.12451	0.284556	0.902886	REACTOME_HSP90_CHAPERONE_CYCLE_FOR_STEROID_HORMONE_RECEPTORS_SHR_IN_THE_PRESENCE_OF_LIGAND	1.43818	0.0452187	0.848575
REACTOME_PEROXISOMAL_PROTEIN_IMPORT	1.21099	0.185374	0.83392	REACTOME_PEROXISOMAL_PROTEIN_IMPORT	0.851977	0.686757	1	REACTOME_PEROXISOMAL_PROTEIN_IMPORT	1.35241	0.0725206	0.849792
REACTOME_JNK_C_JUN_KINASES_PHOSPHORYLATION_AND_ACTIVATION_MEDIATED_BY_ACTIVATED_HUMAN_TAK1	-1.40361	0.104513	0.601736	REACTOME_JNK_C_JUN_KINASES_PHOSPHORYLATION_AND_ACTIVATION_MEDIATED_BY_ACTIVATED_HUMAN_TAK1	0.586043	0.932065	1	REACTOME_JNK_C_JUN_KINASES_PHOSPHORYLATION_AND_ACTIVATION_MEDIATED_BY_ACTIVATED_HUMAN_TAK1	-1.21415	0.246456	0.850044
REACTOME_APOPTOTIC_CLEAVAGE_OF_CELLULAR_PROTEINS	-0.791112	0.781142	0.982187	REACTOME_APOPTOTIC_CLEAVAGE_OF_CELLULAR_PROTEINS	-0.559898	0.983228	1	REACTOME_APOPTOTIC_CLEAVAGE_OF_CELLULAR_PROTEINS	-1.20561	0.224182	0.850492
WP_TYROBP_CAUSAL_NETWORK_IN_MICROGLIA	-0.857807	0.661874	0.952443	WP_TYROBP_CAUSAL_NETWORK_IN_MICROGLIA	-1.05506	0.387934	0.949904	WP_TYROBP_CAUSAL_NETWORK_IN_MICROGLIA	-1.2031	0.237952	0.852274
REACTOME_TOLL_LIKE_RECEPTOR_CASCADES	-1.40406	0.0347985	0.619117	REACTOME_TOLL_LIKE_RECEPTOR_CASCADES	-1.26069	0.0970854	0.735169	REACTOME_TOLL_LIKE_RECEPTOR_CASCADES	-1.20723	0.168359	0.852314
REACTOME_SIGNALING_BY_HIPPO	-0.991753	0.469556	0.897526	REACTOME_SIGNALING_BY_HIPPO	-0.957659	0.515307	1	REACTOME_SIGNALING_BY_HIPPO	-1.21059	0.244186	0.856018
REACTOME_GENERIC_TRANSCRIPTION_PATHWAY	-0.999215	0.447792	0.899729	REACTOME_GENERIC_TRANSCRIPTION_PATHWAY	-1.25633	0.0323394	0.728825	REACTOME_GENERIC_TRANSCRIPTION_PATHWAY	-1.20772	0.0854219	0.859025
REACTOME_SIGNALING_BY_INSULIN_RECEPTOR	0.646021	0.95537	1	REACTOME_SIGNALING_BY_INSULIN_RECEPTOR	-0.578555	0.986021	1	REACTOME_SIGNALING_BY_INSULIN_RECEPTOR	1.34366	0.0819552	0.862579
BIOCARTA_FAS_PATHWAY	-1.28618	0.162271	0.72225	BIOCARTA_FAS_PATHWAY	-0.730032	0.823644	1	BIOCARTA_FAS_PATHWAY	-1.19703	0.249661	0.86871
REACTOME_GENE_EXPRESSION_TRANSCRIPTION	-1.05731	0.249787	0.808311	REACTOME_GENE_EXPRESSION_TRANSCRIPTION	-1.27122	0.0137694	0.731218	REACTOME_GENE_EXPRESSION_TRANSCRIPTION	-1.18684	0.0767352	0.884919
REACTOME_ACTIVATION_OF_BH3_ONLY_PROTEINS	1.26215	0.191372	0.795911	REACTOME_ACTIVATION_OF_BH3_ONLY_PROTEINS	0.713504	0.811388	1	REACTOME_ACTIVATION_OF_BH3_ONLY_PROTEINS	1.3328	0.131042	0.885383
REACTOME_CDC42_GTPASE_CYCLE	-0.689215	0.963357	1	REACTOME_CDC42_GTPASE_CYCLE	0.637723	0.976687	1	REACTOME_CDC42_GTPASE_CYCLE	-1.18879	0.207422	0.885452
REACTOME_EXTRACELLULAR_MATRIX_ORGANIZATION	2.05957	0	0.0187455	REACTOME_EXTRACELLULAR_MATRIX_ORGANIZATION	2.51949	0	0	REACTOME_EXTRACELLULAR_MATRIX_ORGANIZATION	-1.18448	0.199318	0.88623
REACTOME_GABA_B_RECEPTOR_ACTIVATION	-1.43466	0.0674913	0.599043	REACTOME_GABA_B_RECEPTOR_ACTIVATION	-1.245	0.167669	0.716698	REACTOME_GABA_B_RECEPTOR_ACTIVATION	-1.19038	0.238523	0.887421
REACTOME_TRANSPORT_TO_THE_GOLGI_AND_SUBSEQUENT_MODIFICATION	1.50644	0.00869565	0.40382	REACTOME_TRANSPORT_TO_THE_GOLGI_AND_SUBSEQUENT_MODIFICATION	1.10052	0.263379	0.887048	REACTOME_TRANSPORT_TO_THE_GOLGI_AND_SUBSEQUENT_MODIFICATION	1.43855	0.00593032	0.889169
REACTOME_PKMTS_METHYLATE_HISTONE_LYSINES	-1.34601	0.115622	0.655818	REACTOME_PKMTS_METHYLATE_HISTONE_LYSINES	-1.51354	0.0421316	0.507082	REACTOME_PKMTS_METHYLATE_HISTONE_LYSINES	-1.17728	0.262018	0.890702
WP_WNT_SIGNALING_PATHWAY_WP539	0.728598	0.914402	1	WP_WNT_SIGNALING_PATHWAY_WP539	-1.03921	0.382364	0.940075	WP_WNT_SIGNALING_PATHWAY_WP539	-1.17972	0.219635	0.8974
REACTOME_GENE_SILENCING_BY_RNA	-1.24344	0.168265	0.748693	REACTOME_GENE_SILENCING_BY_RNA	-1.13352	0.276604	0.809825	REACTOME_GENE_SILENCING_BY_RNA	-1.17762	0.246688	0.897597
REACTOME_SUMOYLATION_OF_SUMOYLATION_PROTEINS	-0.945639	0.532431	0.907131	REACTOME_SUMOYLATION_OF_SUMOYLATION_PROTEINS	-0.93817	0.551204	1	REACTOME_SUMOYLATION_OF_SUMOYLATION_PROTEINS	-1.15974	0.265641	0.905516
WP_MRNA_PROCESSING	-0.89881	0.808896	0.938129	WP_MRNA_PROCESSING	-0.954403	0.609602	1	WP_MRNA_PROCESSING	-1.16241	0.140777	0.910591
REACTOME_INOSITOL_PHOSPHATE_METABOLISM	-0.667407	0.936518	1	REACTOME_INOSITOL_PHOSPHATE_METABOLISM	0.76185	0.808162	1	REACTOME_INOSITOL_PHOSPHATE_METABOLISM	-1.16006	0.265938	0.912141
REACTOME_ESR_MEDIATED_SIGNALING	1.13594	0.244628	0.984113	REACTOME_ESR_MEDIATED_SIGNALING	-0.914778	0.617541	1	REACTOME_ESR_MEDIATED_SIGNALING	-1.16688	0.225293	0.917004
WP_ESTROGEN_SIGNALING	-1.23947	0.152405	0.725682	WP_ESTROGEN_SIGNALING	-1.15636	0.22592	0.810172	WP_ESTROGEN_SIGNALING	-1.16249	0.248636	0.91834
REACTOME_RHOB_GTPASE_CYCLE	0.543792	0.996969	1	REACTOME_RHOB_GTPASE_CYCLE	0.939264	0.538925	0.966957	REACTOME_RHOB_GTPASE_CYCLE	-1.16689	0.244507	0.925294
REACTOME_GPCR_LIGAND_BINDING	-1.20234	0.143091	0.740656	REACTOME_GPCR_LIGAND_BINDING	-1.19765	0.152929	0.760276	REACTOME_GPCR_LIGAND_BINDING	-1.16253	0.222276	0.92639
REACTOME_SUMOYLATION	-1.25586	0.11349	0.731248	REACTOME_SUMOYLATION	-1.32168	0.0645484	0.682553	REACTOME_SUMOYLATION	-1.1358	0.263623	0.931979
REACTOME_CLASS_A_1_RHODOPSIN_LIKE_RECEPTORS	-1.17556	0.190348	0.760082	REACTOME_CLASS_A_1_RHODOPSIN_LIKE_RECEPTORS	-0.882803	0.687488	1	REACTOME_CLASS_A_1_RHODOPSIN_LIKE_RECEPTORS	-1.1454	0.259571	0.931981
REACTOME_NUCLEAR_PORE_COMPLEX_NPC_DISASSEMBLY	-1.34769	0.115318	0.666374	REACTOME_NUCLEAR_PORE_COMPLEX_NPC_DISASSEMBLY	-1.01596	0.432956	0.972193	REACTOME_NUCLEAR_PORE_COMPLEX_NPC_DISASSEMBLY	-1.14254	0.289685	0.935765
REACTOME_CELL_CELL_JUNCTION_ORGANIZATION	-1.12192	0.280269	0.811102	REACTOME_CELL_CELL_JUNCTION_ORGANIZATION	1.05064	0.375103	0.877142	REACTOME_CELL_CELL_JUNCTION_ORGANIZATION	-1.13862	0.290096	0.936088
WP_FAS_PATHWAY_AND_STRESS_INDUCTION_OF_HSP_REGULATION	-0.976225	0.4774	0.908762	WP_FAS_PATHWAY_AND_STRESS_INDUCTION_OF_HSP_REGULATION	-0.745516	0.822409	1	WP_FAS_PATHWAY_AND_STRESS_INDUCTION_OF_HSP_REGULATION	-1.13622	0.299133	0.937823
REACTOME_ADHERENS_JUNCTIONS_INTERACTIONS	-0.831647	0.710064	0.969613	REACTOME_ADHERENS_JUNCTIONS_INTERACTIONS	0.952686	0.502808	0.949774	REACTOME_ADHERENS_JUNCTIONS_INTERACTIONS	-1.14569	0.29493	0.938605
REACTOME_SIGNALING_BY_PDGF	1.42469	0.068708	0.56108	REACTOME_SIGNALING_BY_PDGF	1.87871	0.00168492	0.0789864	REACTOME_SIGNALING_BY_PDGF	-1.13966	0.288073	0.939603
REACTOME_VISUAL_PHOTOTRANSDUCTION	-1.32808	0.115468	0.639914	REACTOME_VISUAL_PHOTOTRANSDUCTION	-1.11397	0.296631	0.847355	REACTOME_VISUAL_PHOTOTRANSDUCTION	-1.14809	0.283741	0.944801
REACTOME_FACTORS_INVOLVED_IN_MEGAKARYOCYTE_DEVELOPMENT_AND_PLATELET_PRODUCTION	-0.878302	0.691684	0.940977	REACTOME_FACTORS_INVOLVED_IN_MEGAKARYOCYTE_DEVELOPMENT_AND_PLATELET_PRODUCTION	-0.860442	0.723311	1	REACTOME_FACTORS_INVOLVED_IN_MEGAKARYOCYTE_DEVELOPMENT_AND_PLATELET_PRODUCTION	-1.14601	0.257799	0.945278
REACTOME_GLOBAL_GENOME_NUCLEOTIDE_EXCISION_REPAIR_GG_NER	-0.909398	0.607421	0.951511	REACTOME_GLOBAL_GENOME_NUCLEOTIDE_EXCISION_REPAIR_GG_NER	-1.14466	0.245121	0.810416	REACTOME_GLOBAL_GENOME_NUCLEOTIDE_EXCISION_REPAIR_GG_NER	-1.12738	0.293283	0.957817
REACTOME_SIGNALING_BY_FGFR3	0.957303	0.516032	0.950623	REACTOME_SIGNALING_BY_FGFR3	0.641005	0.916192	1	REACTOME_SIGNALING_BY_FGFR3	1.0657	0.35416	0.969691
REACTOME_S_PHASE	0.629879	0.988411	1	REACTOME_S_PHASE	0.662886	0.978839	1	REACTOME_S_PHASE	0.642285	0.996263	0.972452
REACTOME_OPIOID_SIGNALLING	-0.820179	0.778783	0.966272	REACTOME_OPIOID_SIGNALLING	-0.527967	0.998608	1	REACTOME_OPIOID_SIGNALLING	0.651438	0.977634	0.973526
WP_ALZHEIMERS_DISEASE	0.836315	0.737166	1	WP_ALZHEIMERS_DISEASE	-0.606665	0.9835	1	WP_ALZHEIMERS_DISEASE	0.660842	0.970329	0.973982
REACTOME_PLASMA_LIPOPROTEIN_ASSEMBLY_REMODELING_AND_CLEARANCE	0.984177	0.475563	0.9551	REACTOME_PLASMA_LIPOPROTEIN_ASSEMBLY_REMODELING_AND_CLEARANCE	-1.14457	0.26184	0.802726	REACTOME_PLASMA_LIPOPROTEIN_ASSEMBLY_REMODELING_AND_CLEARANCE	-1.12143	0.308902	0.974032
REACTOME_ABC_FAMILY_PROTEINS_MEDIATED_TRANSPORT	-1.27575	0.102129	0.702696	REACTOME_ABC_FAMILY_PROTEINS_MEDIATED_TRANSPORT	0.927492	0.577496	0.983438	REACTOME_ABC_FAMILY_PROTEINS_MEDIATED_TRANSPORT	0.64366	0.995054	0.974983
WP_PRIMARY_FOCAL_SEGMENTAL_GLOMERULOSCLEROSIS_FSGS	1.31446	0.103486	0.724422	WP_PRIMARY_FOCAL_SEGMENTAL_GLOMERULOSCLEROSIS_FSGS	1.72719	0.00938775	0.220767	WP_PRIMARY_FOCAL_SEGMENTAL_GLOMERULOSCLEROSIS_FSGS	0.654138	0.974186	0.975169
REACTOME_BRANCHED_CHAIN_AMINO_ACID_CATABOLISM	-0.613353	0.947888	1	REACTOME_BRANCHED_CHAIN_AMINO_ACID_CATABOLISM	-0.804136	0.727238	1	REACTOME_BRANCHED_CHAIN_AMINO_ACID_CATABOLISM	0.631507	0.943468	0.975223
REACTOME_NEUREXINS_AND_NEUROLIGINS	-0.685525	0.911266	1	REACTOME_NEUREXINS_AND_NEUROLIGINS	-0.499695	0.994599	1	REACTOME_NEUREXINS_AND_NEUROLIGINS	0.663238	0.938247	0.975672
REACTOME_DEVELOPMENTAL_BIOLOGY	-1.10727	0.199798	0.801286	REACTOME_DEVELOPMENTAL_BIOLOGY	1.48478	0.00507713	0.511865	REACTOME_DEVELOPMENTAL_BIOLOGY	1.06604	0.23125	0.97762
REACTOME_HEDGEHOG_OFF_STATE	0.648813	0.985984	1	REACTOME_HEDGEHOG_OFF_STATE	0.872846	0.685622	1	REACTOME_HEDGEHOG_OFF_STATE	0.66386	0.990674	0.978672
REACTOME_APOPTOSIS	0.588923	0.993825	1	REACTOME_APOPTOSIS	0.63659	0.979608	1	REACTOME_APOPTOSIS	1.0676	0.308782	0.980868
BIOCARTA_AT1R_PATHWAY	0.796588	0.74243	1	BIOCARTA_AT1R_PATHWAY	-0.758961	0.794572	1	BIOCARTA_AT1R_PATHWAY	0.665258	0.904079	0.981125
REACTOME_SELECTIVE_AUTOPHAGY	1.11314	0.286915	0.988913	REACTOME_SELECTIVE_AUTOPHAGY	0.91369	0.578357	0.983789	REACTOME_SELECTIVE_AUTOPHAGY	0.681992	0.965842	0.981906
REACTOME_DOWNSTREAM_SIGNAL_TRANSDUCTION	0.838992	0.689383	1	REACTOME_DOWNSTREAM_SIGNAL_TRANSDUCTION	1.21043	0.219614	0.840492	REACTOME_DOWNSTREAM_SIGNAL_TRANSDUCTION	1.06015	0.367065	0.981923
REACTOME_SIGNALING_BY_FGFR	0.784188	0.810536	1	REACTOME_SIGNALING_BY_FGFR	0.443171	0.998991	1	REACTOME_SIGNALING_BY_FGFR	0.677682	0.955759	0.981966
REACTOME_PLATELET_SENSITIZATION_BY_LDL	-1.47434	0.0701348	0.496659	REACTOME_PLATELET_SENSITIZATION_BY_LDL	0.65007	0.881943	1	REACTOME_PLATELET_SENSITIZATION_BY_LDL	0.672785	0.886466	0.982401
BIOCARTA_IGF1_PATHWAY	1.25747	0.196456	0.78588	BIOCARTA_IGF1_PATHWAY	1.23512	0.221988	0.801407	BIOCARTA_IGF1_PATHWAY	1.06937	0.366513	0.983361
REACTOME_HEDGEHOG_ON_STATE	0.986629	0.468593	0.951651	REACTOME_HEDGEHOG_ON_STATE	0.887246	0.615874	1	REACTOME_HEDGEHOG_ON_STATE	0.666344	0.96549	0.983832
REACTOME_RHOBTB_GTPASE_CYCLE	1.18232	0.233609	0.904636	REACTOME_RHOBTB_GTPASE_CYCLE	1.03481	0.394471	0.878861	REACTOME_RHOBTB_GTPASE_CYCLE	0.682396	0.933645	0.985111
REACTOME_INSULIN_RECEPTOR_SIGNALLING_CASCADE	-0.651663	0.924724	1	REACTOME_INSULIN_RECEPTOR_SIGNALLING_CASCADE	-0.594051	0.960161	1	REACTOME_INSULIN_RECEPTOR_SIGNALLING_CASCADE	0.602508	0.958296	0.985497
REACTOME_APC_C_MEDIATED_DEGRADATION_OF_CELL_CYCLE_PROTEINS	1.06883	0.343694	1	REACTOME_APC_C_MEDIATED_DEGRADATION_OF_CELL_CYCLE_PROTEINS	1.22772	0.175026	0.7995	REACTOME_APC_C_MEDIATED_DEGRADATION_OF_CELL_CYCLE_PROTEINS	1.07095	0.314815	0.986715
REACTOME_RAS_PROCESSING	1.08373	0.35678	1	REACTOME_RAS_PROCESSING	-0.615926	0.930778	1	REACTOME_RAS_PROCESSING	1.05646	0.377348	0.987232
REACTOME_TRANSCRIPTIONAL_REGULATION_BY_RUNX2	0.996671	0.453282	0.950595	REACTOME_TRANSCRIPTIONAL_REGULATION_BY_RUNX2	0.670055	0.943377	1	REACTOME_TRANSCRIPTIONAL_REGULATION_BY_RUNX2	0.682826	0.957668	0.988286
REACTOME_TRANSFERRIN_ENDOCYTOSIS_AND_RECYCLING	0.950868	0.525205	0.958247	REACTOME_TRANSFERRIN_ENDOCYTOSIS_AND_RECYCLING	0.645256	0.897165	1	REACTOME_TRANSFERRIN_ENDOCYTOSIS_AND_RECYCLING	1.00138	0.440793	0.989188
REACTOME_METABOLISM_OF_STEROIDS	1.67781	0.00489308	0.189697	REACTOME_METABOLISM_OF_STEROIDS	0.991934	0.451482	0.915981	REACTOME_METABOLISM_OF_STEROIDS	1.07274	0.313348	0.989297
REACTOME_SIGNALING_BY_FGFR1	0.710899	0.873712	1	REACTOME_SIGNALING_BY_FGFR1	-0.553265	0.982762	1	REACTOME_SIGNALING_BY_FGFR1	0.58292	0.976467	0.989353
WP_SPLICING_FACTOR_NOVA_REGULATED_SYNAPTIC_PROTEINS	-0.96717	0.488805	0.912202	WP_SPLICING_FACTOR_NOVA_REGULATED_SYNAPTIC_PROTEINS	-0.824553	0.746792	1	WP_SPLICING_FACTOR_NOVA_REGULATED_SYNAPTIC_PROTEINS	0.980787	0.470819	0.990503
BIOCARTA_MCALPAIN_PATHWAY	1.17036	0.265935	0.92728	BIOCARTA_MCALPAIN_PATHWAY	1.66948	0.0319039	0.271098	BIOCARTA_MCALPAIN_PATHWAY	0.683558	0.877852	0.991237
REACTOME_EPH_EPHRIN_MEDIATED_REPULSION_OF_CELLS	0.602479	0.953188	1	REACTOME_EPH_EPHRIN_MEDIATED_REPULSION_OF_CELLS	-0.44498	0.997351	0.997782	REACTOME_EPH_EPHRIN_MEDIATED_REPULSION_OF_CELLS	0.564119	0.976612	0.991622
REACTOME_MITOCHONDRIAL_CALCIUM_ION_TRANSPORT	0.478595	0.986528	1	REACTOME_MITOCHONDRIAL_CALCIUM_ION_TRANSPORT	0.839464	0.650126	1	REACTOME_MITOCHONDRIAL_CALCIUM_ION_TRANSPORT	0.684373	0.879234	0.994148
REACTOME_SIGNALING_BY_FGFR2	1.04316	0.393805	0.996893	REACTOME_SIGNALING_BY_FGFR2	0.74857	0.817224	1	REACTOME_SIGNALING_BY_FGFR2	0.997881	0.445452	0.99427
REACTOME_REGULATION_OF_PTEN_STABILITY_AND_ACTIVITY	1.28643	0.119254	0.780719	REACTOME_REGULATION_OF_PTEN_STABILITY_AND_ACTIVITY	1.31616	0.118154	0.706979	REACTOME_REGULATION_OF_PTEN_STABILITY_AND_ACTIVITY	1.12765	0.235342	0.994538
REACTOME_FC_EPSILON_RECEPTOR_FCERI_SIGNALING	0.746294	0.915883	1	REACTOME_FC_EPSILON_RECEPTOR_FCERI_SIGNALING	1.03926	0.37462	0.885727	REACTOME_FC_EPSILON_RECEPTOR_FCERI_SIGNALING	0.706605	0.981193	0.994854
REACTOME_RET_SIGNALING	1.28332	0.154539	0.77251	REACTOME_RET_SIGNALING	1.59857	0.037037	0.359904	REACTOME_RET_SIGNALING	0.694565	0.897332	0.995796
BIOCARTA_STRESS_PATHWAY	-1.03173	0.407875	0.869435	BIOCARTA_STRESS_PATHWAY	0.762229	0.75671	1	BIOCARTA_STRESS_PATHWAY	0.479676	0.989978	0.995819
REACTOME_CA2_PATHWAY	0.924852	0.558044	0.954099	REACTOME_CA2_PATHWAY	-1.03585	0.404823	0.944814	REACTOME_CA2_PATHWAY	0.981185	0.47644	0.996103
REACTOME_REGULATION_OF_TP53_DEGRADATION	0.605498	0.942911	1	REACTOME_REGULATION_OF_TP53_DEGRADATION	-0.957514	0.506807	1	REACTOME_REGULATION_OF_TP53_DEGRADATION	1.0015	0.437236	0.996255
BIOCARTA_PYK2_PATHWAY	-0.588118	0.961596	1	BIOCARTA_PYK2_PATHWAY	-0.707451	0.865305	1	BIOCARTA_PYK2_PATHWAY	0.505109	0.990407	0.996382
REACTOME_L1CAM_INTERACTIONS	1.02326	0.411969	0.963151	REACTOME_L1CAM_INTERACTIONS	0.796559	0.793019	1	REACTOME_L1CAM_INTERACTIONS	0.685715	0.968504	0.996595
REACTOME_AURKA_ACTIVATION_BY_TPX2	-0.436221	0.999339	0.998502	REACTOME_AURKA_ACTIVATION_BY_TPX2	1.04263	0.383719	0.885791	REACTOME_AURKA_ACTIVATION_BY_TPX2	1.04467	0.374067	0.996998
REACTOME_SYNTHESIS_OF_PC	0.81546	0.711494	1	REACTOME_SYNTHESIS_OF_PC	0.909456	0.557842	0.982812	REACTOME_SYNTHESIS_OF_PC	0.707529	0.863063	0.997605
REACTOME_GOLGI_TO_ER_RETROGRADE_TRANSPORT	1.1274	0.244588	0.978263	REACTOME_GOLGI_TO_ER_RETROGRADE_TRANSPORT	1.17746	0.194227	0.843635	REACTOME_GOLGI_TO_ER_RETROGRADE_TRANSPORT	1.07301	0.287671	0.998117
BIOCARTA_GLEEVEC_PATHWAY	0.812953	0.709808	1	BIOCARTA_GLEEVEC_PATHWAY	0.433068	0.992166	1	BIOCARTA_GLEEVEC_PATHWAY	0.710489	0.853816	0.998147
BIOCARTA_PDGF_PATHWAY	0.731061	0.825779	1	BIOCARTA_PDGF_PATHWAY	-0.83753	0.694455	1	BIOCARTA_PDGF_PATHWAY	0.695712	0.883834	0.99839
REACTOME_SIGNALING_BY_EGFR	-0.695991	0.907521	1	REACTOME_SIGNALING_BY_EGFR	-0.629898	0.956163	1	REACTOME_SIGNALING_BY_EGFR	0.514676	0.996925	0.998455
REACTOME_MAPK_FAMILY_SIGNALING_CASCADES	1.02379	0.401715	0.976974	REACTOME_MAPK_FAMILY_SIGNALING_CASCADES	0.779922	0.943042	1	REACTOME_MAPK_FAMILY_SIGNALING_CASCADES	0.713584	0.998912	0.99853
WP_PROTEASOME_DEGRADATION	-0.905345	0.598805	0.935932	WP_PROTEASOME_DEGRADATION	-0.714281	0.904412	1	WP_PROTEASOME_DEGRADATION	0.699004	0.927246	0.998915
BIOCARTA_GPCR_PATHWAY	-0.542968	0.980306	1	BIOCARTA_GPCR_PATHWAY	-0.824384	0.694026	1	BIOCARTA_GPCR_PATHWAY	-0.338864	0.999692	0.999895
REACTOME_SMOOTH_MUSCLE_CONTRACTION	2.09555	0.000189251	0.0145071	REACTOME_SMOOTH_MUSCLE_CONTRACTION	2.23465	0	0.00117585	REACTOME_SMOOTH_MUSCLE_CONTRACTION	-0.88747	0.620323	1
REACTOME_RHO_GTPASES_ACTIVATE_PAKS	2.04771	0.000186116	0.017034	REACTOME_RHO_GTPASES_ACTIVATE_PAKS	2.2095	0	0.00124071	REACTOME_RHO_GTPASES_ACTIVATE_PAKS	-0.458235	0.990926	1
REACTOME_COMPLEMENT_CASCADE	1.87126	0.00227316	0.0502699	REACTOME_COMPLEMENT_CASCADE	1.4507	0.0945014	0.525419	REACTOME_COMPLEMENT_CASCADE	-0.958909	0.519225	1
REACTOME_PHASE_I_FUNCTIONALIZATION_OF_COMPOUNDS	1.84074	0.00277829	0.0660041	REACTOME_PHASE_I_FUNCTIONALIZATION_OF_COMPOUNDS	1.63054	0.0218457	0.325468	REACTOME_PHASE_I_FUNCTIONALIZATION_OF_COMPOUNDS	1.20582	0.187153	1
REACTOME_RESPONSE_TO_ELEVATED_PLATELET_CYTOSOLIC_CA2	1.79898	0.000537153	0.0950283	REACTOME_RESPONSE_TO_ELEVATED_PLATELET_CYTOSOLIC_CA2	1.27561	0.123618	0.740893	REACTOME_RESPONSE_TO_ELEVATED_PLATELET_CYTOSOLIC_CA2	-0.980581	0.503001	1
WP_OXIDATIVE_STRESS_RESPONSE	1.75882	0.0074215	0.124298	WP_OXIDATIVE_STRESS_RESPONSE	-0.672993	0.899329	1	WP_OXIDATIVE_STRESS_RESPONSE	0.901859	0.597218	1
REACTOME_REGULATION_OF_INSULIN_LIKE_GROWTH_FACTOR_IGF_TRANSPORT_AND_UPTAKE_BY_INSULIN_LIKE_GROWTH_FACTOR_BINDING_PROTEINS_IGFBPS	1.65687	0.00711111	0.216007	REACTOME_REGULATION_OF_INSULIN_LIKE_GROWTH_FACTOR_IGF_TRANSPORT_AND_UPTAKE_BY_INSULIN_LIKE_GROWTH_FACTOR_BINDING_PROTEINS_IGFBPS	1.61211	0.0119337	0.353558	REACTOME_REGULATION_OF_INSULIN_LIKE_GROWTH_FACTOR_IGF_TRANSPORT_AND_UPTAKE_BY_INSULIN_LIKE_GROWTH_FACTOR_BINDING_PROTEINS_IGFBPS	-0.82697	0.747113	1
WP_METAPATHWAY_BIOTRANSFORMATION	1.63189	0.0125201	0.244089	WP_METAPATHWAY_BIOTRANSFORMATION	1.18311	0.220864	0.832484	WP_METAPATHWAY_BIOTRANSFORMATION	1.17147	0.203804	1
BIOCARTA_MTOR_PATHWAY	1.55084	0.0376633	0.350919	BIOCARTA_MTOR_PATHWAY	1.14507	0.297782	0.884687	BIOCARTA_MTOR_PATHWAY	1.13557	0.295699	1
REACTOME_DISASSEMBLY_OF_THE_DESTRUCTION_COMPLEX_AND_RECRUITMENT_OF_AXIN_TO_THE_MEMBRANE	1.57299	0.0365127	0.351786	REACTOME_DISASSEMBLY_OF_THE_DESTRUCTION_COMPLEX_AND_RECRUITMENT_OF_AXIN_TO_THE_MEMBRANE	1.18545	0.240902	0.832538	REACTOME_DISASSEMBLY_OF_THE_DESTRUCTION_COMPLEX_AND_RECRUITMENT_OF_AXIN_TO_THE_MEMBRANE	0.863328	0.653726	1
BIOCARTA_IGF1MTOR_PATHWAY	1.56558	0.0408823	0.359024	BIOCARTA_IGF1MTOR_PATHWAY	1.33921	0.149928	0.684472	BIOCARTA_IGF1MTOR_PATHWAY	1.19328	0.236763	1
WP_FOCAL_ADHESION	1.55883	0.00621654	0.364024	WP_FOCAL_ADHESION	2.25837	0	0.000876815	WP_FOCAL_ADHESION	-0.908158	0.643803	1
REACTOME_TGF_BETA_RECEPTOR_SIGNALING_ACTIVATES_SMADS	1.54002	0.042164	0.367519	REACTOME_TGF_BETA_RECEPTOR_SIGNALING_ACTIVATES_SMADS	1.995	0.00145955	0.0204092	REACTOME_TGF_BETA_RECEPTOR_SIGNALING_ACTIVATES_SMADS	-0.816915	0.708075	1
WP_TRYPTOPHAN_METABOLISM	1.55286	0.033421	0.367809	WP_TRYPTOPHAN_METABOLISM	1.24139	0.196483	0.789737	WP_TRYPTOPHAN_METABOLISM	1.09672	0.30925	1
REACTOME_GLUTATHIONE_CONJUGATION	1.50273	0.0447566	0.403892	REACTOME_GLUTATHIONE_CONJUGATION	-0.825688	0.707884	1	REACTOME_GLUTATHIONE_CONJUGATION	1.00176	0.447789	1
BIOCARTA_TFF_PATHWAY	1.49804	0.0643142	0.406534	BIOCARTA_TFF_PATHWAY	1.08911	0.344872	0.880138	BIOCARTA_TFF_PATHWAY	1.13084	0.296668	1
REACTOME_ROLE_OF_PHOSPHOLIPIDS_IN_PHAGOCYTOSIS	1.51014	0.0550807	0.414669	REACTOME_ROLE_OF_PHOSPHOLIPIDS_IN_PHAGOCYTOSIS	-1.00504	0.462185	0.989448	REACTOME_ROLE_OF_PHOSPHOLIPIDS_IN_PHAGOCYTOSIS	-0.909227	0.583097	1
REACTOME_COPI_MEDIATED_ANTEROGRADE_TRANSPORT	1.48767	0.0193798	0.424171	REACTOME_COPI_MEDIATED_ANTEROGRADE_TRANSPORT	1.06852	0.325105	0.875764	REACTOME_COPI_MEDIATED_ANTEROGRADE_TRANSPORT	1.27378	0.0878378	1
REACTOME_ADRENALINE_NORADRENALINE_INHIBITS_INSULIN_SECRETION	-1.55299	0.0403192	0.442891	REACTOME_ADRENALINE_NORADRENALINE_INHIBITS_INSULIN_SECRETION	-1.33461	0.130852	0.70594	REACTOME_ADRENALINE_NORADRENALINE_INHIBITS_INSULIN_SECRETION	-0.839632	0.684973	1
REACTOME_PRESYNAPTIC_FUNCTION_OF_KAINATE_RECEPTORS	-1.57724	0.0380711	0.452492	REACTOME_PRESYNAPTIC_FUNCTION_OF_KAINATE_RECEPTORS	-1.48479	0.0668947	0.519091	REACTOME_PRESYNAPTIC_FUNCTION_OF_KAINATE_RECEPTORS	-0.810942	0.714218	1
REACTOME_POTASSIUM_CHANNELS	-1.68077	0.0087216	0.453404	REACTOME_POTASSIUM_CHANNELS	-1.84142	0.000972384	0.139027	REACTOME_POTASSIUM_CHANNELS	-1.07326	0.354291	1
REACTOME_G_PROTEIN_BETA_GAMMA_SIGNALLING	-1.50411	0.0496331	0.470454	REACTOME_G_PROTEIN_BETA_GAMMA_SIGNALLING	-1.32346	0.135078	0.68963	REACTOME_G_PROTEIN_BETA_GAMMA_SIGNALLING	-0.816432	0.711515	1
REACTOME_G_ALPHA_Z_SIGNALLING_EVENTS	-1.49667	0.0531915	0.471826	REACTOME_G_ALPHA_Z_SIGNALLING_EVENTS	-1.32361	0.123367	0.703379	REACTOME_G_ALPHA_Z_SIGNALLING_EVENTS	-0.985889	0.488935	1
REACTOME_G_BETA_GAMMA_SIGNALLING_THROUGH_CDC42	-1.63853	0.0276936	0.484038	REACTOME_G_BETA_GAMMA_SIGNALLING_THROUGH_CDC42	-1.44739	0.0785371	0.534043	REACTOME_G_BETA_GAMMA_SIGNALLING_THROUGH_CDC42	-0.846341	0.66886	1
REACTOME_REGULATION_OF_PTEN_GENE_TRANSCRIPTION	-1.50515	0.0469083	0.487974	REACTOME_REGULATION_OF_PTEN_GENE_TRANSCRIPTION	-0.996818	0.458509	1	REACTOME_REGULATION_OF_PTEN_GENE_TRANSCRIPTION	-0.990319	0.483852	1
REACTOME_MUSCLE_CONTRACTION	1.43152	0.0278508	0.549783	REACTOME_MUSCLE_CONTRACTION	1.8556	0.000605571	0.0929878	REACTOME_MUSCLE_CONTRACTION	-0.766171	0.865063	1
WP_FOCAL_ADHESION_PI3KAKTMTOR_SIGNALING_PATHWAY	1.41939	0.0199324	0.567696	WP_FOCAL_ADHESION_PI3KAKTMTOR_SIGNALING_PATHWAY	1.67864	0.00157202	0.274626	WP_FOCAL_ADHESION_PI3KAKTMTOR_SIGNALING_PATHWAY	-0.887976	0.69818	1
REACTOME_DNA_DAMAGE_BYPASS	-1.42656	0.0785989	0.604991	REACTOME_DNA_DAMAGE_BYPASS	-1.0927	0.33875	0.876412	REACTOME_DNA_DAMAGE_BYPASS	-0.997733	0.470141	1
REACTOME_RECOGNITION_OF_DNA_DAMAGE_BY_PCNA_CONTAINING_REPLICATION_COMPLEX	-1.4134	0.0969125	0.607543	REACTOME_RECOGNITION_OF_DNA_DAMAGE_BY_PCNA_CONTAINING_REPLICATION_COMPLEX	-1.14434	0.298029	0.795635	REACTOME_RECOGNITION_OF_DNA_DAMAGE_BY_PCNA_CONTAINING_REPLICATION_COMPLEX	-1.04498	0.417378	1
REACTOME_G_ALPHA_S_SIGNALLING_EVENTS	-1.38823	0.0737079	0.615996	REACTOME_G_ALPHA_S_SIGNALLING_EVENTS	-1.27711	0.128586	0.73331	REACTOME_G_ALPHA_S_SIGNALLING_EVENTS	-1.09922	0.333198	1
REACTOME_G_BETA_GAMMA_SIGNALLING_THROUGH_PI3KGAMMA	-1.32852	0.134291	0.652716	REACTOME_G_BETA_GAMMA_SIGNALLING_THROUGH_PI3KGAMMA	-1.33968	0.127647	0.701931	REACTOME_G_BETA_GAMMA_SIGNALLING_THROUGH_PI3KGAMMA	-0.699691	0.847664	1
REACTOME_RECEPTOR_TYPE_TYROSINE_PROTEIN_PHOSPHATASES	1.38477	0.10579	0.654493	REACTOME_RECEPTOR_TYPE_TYROSINE_PROTEIN_PHOSPHATASES	0.557713	0.957545	1	REACTOME_RECEPTOR_TYPE_TYROSINE_PROTEIN_PHOSPHATASES	0.992129	0.456877	1
REACTOME_TRANSLESION_SYNTHESIS_BY_Y_FAMILY_DNA_POLYMERASES_BYPASSES_LESIONS_ON_DNA_TEMPLATE	-1.34113	0.129457	0.656178	REACTOME_TRANSLESION_SYNTHESIS_BY_Y_FAMILY_DNA_POLYMERASES_BYPASSES_LESIONS_ON_DNA_TEMPLATE	-1.1407	0.293814	0.800552	REACTOME_TRANSLESION_SYNTHESIS_BY_Y_FAMILY_DNA_POLYMERASES_BYPASSES_LESIONS_ON_DNA_TEMPLATE	-0.910463	0.583033	1
REACTOME_OXIDATIVE_STRESS_INDUCED_SENESCENCE	-1.3646	0.110028	0.659745	REACTOME_OXIDATIVE_STRESS_INDUCED_SENESCENCE	1.14995	0.275756	0.883304	REACTOME_OXIDATIVE_STRESS_INDUCED_SENESCENCE	-0.927183	0.570148	1
REACTOME_THROMBOXANE_SIGNALLING_THROUGH_TP_RECEPTOR	-1.3172	0.141044	0.661092	REACTOME_THROMBOXANE_SIGNALLING_THROUGH_TP_RECEPTOR	-0.922438	0.558929	1	REACTOME_THROMBOXANE_SIGNALLING_THROUGH_TP_RECEPTOR	-0.778007	0.752917	1
REACTOME_FCGAMMA_RECEPTOR_FCGR_DEPENDENT_PHAGOCYTOSIS	1.37207	0.0620751	0.664576	REACTOME_FCGAMMA_RECEPTOR_FCGR_DEPENDENT_PHAGOCYTOSIS	0.885681	0.636843	1	REACTOME_FCGAMMA_RECEPTOR_FCGR_DEPENDENT_PHAGOCYTOSIS	-0.648706	0.957159	1
REACTOME_AGGREPHAGY	1.35613	0.106917	0.665621	REACTOME_AGGREPHAGY	0.714442	0.845535	1	REACTOME_AGGREPHAGY	0.768583	0.82577	1
WP_GPCRS_CLASS_A_RHODOPSINLIKE	-1.329	0.118739	0.665931	WP_GPCRS_CLASS_A_RHODOPSINLIKE	-1.19231	0.224802	0.760924	WP_GPCRS_CLASS_A_RHODOPSINLIKE	-1.08858	0.354356	1
REACTOME_VEGFR2_MEDIATED_VASCULAR_PERMEABILITY	1.37372	0.0971236	0.670626	REACTOME_VEGFR2_MEDIATED_VASCULAR_PERMEABILITY	1.47003	0.0755647	0.506028	REACTOME_VEGFR2_MEDIATED_VASCULAR_PERMEABILITY	0.884283	0.626313	1
REACTOME_CELL_EXTRACELLULAR_MATRIX_INTERACTIONS	1.35779	0.126918	0.670663	REACTOME_CELL_EXTRACELLULAR_MATRIX_INTERACTIONS	1.73379	0.0174021	0.219839	REACTOME_CELL_EXTRACELLULAR_MATRIX_INTERACTIONS	-0.672709	0.87217	1
REACTOME_SIGNALING_BY_NTRKS	1.36625	0.0730469	0.674196	REACTOME_SIGNALING_BY_NTRKS	1.13519	0.262416	0.89588	REACTOME_SIGNALING_BY_NTRKS	1.17683	0.177988	1
BIOCARTA_NFAT_PATHWAY	1.36169	0.100884	0.679085	BIOCARTA_NFAT_PATHWAY	1.15885	0.263003	0.868387	BIOCARTA_NFAT_PATHWAY	0.933962	0.540462	1
REACTOME_TELOMERE_MAINTENANCE	-1.28052	0.157676	0.699982	REACTOME_TELOMERE_MAINTENANCE	-0.808928	0.74491	1	REACTOME_TELOMERE_MAINTENANCE	-1.04623	0.411712	1
REACTOME_SIGNALING_BY_NTRK1_TRKA	1.33505	0.0924782	0.700333	REACTOME_SIGNALING_BY_NTRK1_TRKA	1.17151	0.224419	0.848335	REACTOME_SIGNALING_BY_NTRK1_TRKA	1.19471	0.186298	1
REACTOME_AMINE_LIGAND_BINDING_RECEPTORS	-1.71628	0.0168563	0.701106	REACTOME_AMINE_LIGAND_BINDING_RECEPTORS	-1.48621	0.0592067	0.56052	REACTOME_AMINE_LIGAND_BINDING_RECEPTORS	-0.959053	0.52393	1
REACTOME_RHOH_GTPASE_CYCLE	1.33728	0.116345	0.702549	REACTOME_RHOH_GTPASE_CYCLE	1.47468	0.067132	0.504604	REACTOME_RHOH_GTPASE_CYCLE	-1.02552	0.431049	1
REACTOME_ACTIVATION_OF_KAINATE_RECEPTORS_UPON_GLUTAMATE_BINDING	-1.28183	0.152859	0.709089	REACTOME_ACTIVATION_OF_KAINATE_RECEPTORS_UPON_GLUTAMATE_BINDING	-1.48437	0.0545138	0.499846	REACTOME_ACTIVATION_OF_KAINATE_RECEPTORS_UPON_GLUTAMATE_BINDING	0.921798	0.560574	1
REACTOME_ADP_SIGNALLING_THROUGH_P2Y_PURINOCEPTOR_1	-1.29836	0.156363	0.709311	REACTOME_ADP_SIGNALLING_THROUGH_P2Y_PURINOCEPTOR_1	-0.912423	0.578844	1	REACTOME_ADP_SIGNALLING_THROUGH_P2Y_PURINOCEPTOR_1	-0.699511	0.841673	1
WP_TRANSLATION_FACTORS	1.33844	0.104578	0.709448	WP_TRANSLATION_FACTORS	1.19992	0.211626	0.816169	WP_TRANSLATION_FACTORS	1.00412	0.442544	1
REACTOME_PLATELET_ACTIVATION_SIGNALING_AND_AGGREGATION	1.34023	0.0365282	0.713951	REACTOME_PLATELET_ACTIVATION_SIGNALING_AND_AGGREGATION	1.01646	0.406108	0.899982	REACTOME_PLATELET_ACTIVATION_SIGNALING_AND_AGGREGATION	-1.00256	0.471843	1
REACTOME_FCERI_MEDIATED_MAPK_ACTIVATION	-1.26344	0.16816	0.718355	REACTOME_FCERI_MEDIATED_MAPK_ACTIVATION	-0.764587	0.791276	1	REACTOME_FCERI_MEDIATED_MAPK_ACTIVATION	-0.882785	0.622608	1
REACTOME_LDL_CLEARANCE	1.31291	0.151354	0.72004	REACTOME_LDL_CLEARANCE	1.20664	0.244355	0.835683	REACTOME_LDL_CLEARANCE	0.864417	0.649756	1
BIOCARTA_INTEGRIN_PATHWAY	1.3171	0.126351	0.725243	BIOCARTA_INTEGRIN_PATHWAY	1.61143	0.0342881	0.343608	BIOCARTA_INTEGRIN_PATHWAY	0.923021	0.572866	1
REACTOME_POST_TRANSLATIONAL_MODIFICATION_SYNTHESIS_OF_GPI_ANCHORED_PROTEINS	1.31943	0.124207	0.727204	REACTOME_POST_TRANSLATIONAL_MODIFICATION_SYNTHESIS_OF_GPI_ANCHORED_PROTEINS	1.14026	0.286604	0.893466	REACTOME_POST_TRANSLATIONAL_MODIFICATION_SYNTHESIS_OF_GPI_ANCHORED_PROTEINS	1.26751	0.145875	1
REACTOME_BASE_EXCISION_REPAIR	-1.21725	0.211616	0.733037	REACTOME_BASE_EXCISION_REPAIR	-0.7337	0.823652	1	REACTOME_BASE_EXCISION_REPAIR	-0.818504	0.699875	1
REACTOME_SUMOYLATION_OF_DNA_DAMAGE_RESPONSE_AND_REPAIR_PROTEINS	-1.23988	0.153761	0.736181	REACTOME_SUMOYLATION_OF_DNA_DAMAGE_RESPONSE_AND_REPAIR_PROTEINS	-1.46462	0.0322768	0.52941	REACTOME_SUMOYLATION_OF_DNA_DAMAGE_RESPONSE_AND_REPAIR_PROTEINS	-0.928006	0.584489	1
REACTOME_G_PROTEIN_ACTIVATION	-1.22277	0.206976	0.736512	REACTOME_G_PROTEIN_ACTIVATION	-0.975917	0.491141	1	REACTOME_G_PROTEIN_ACTIVATION	-0.875003	0.631464	1
WP_IL5_SIGNALING_PATHWAY	-1.19427	0.185419	0.736978	WP_IL5_SIGNALING_PATHWAY	-0.587002	0.98749	1	WP_IL5_SIGNALING_PATHWAY	-0.742766	0.848656	1
REACTOME_PLATELET_CALCIUM_HOMEOSTASIS	1.31946	0.152365	0.738083	REACTOME_PLATELET_CALCIUM_HOMEOSTASIS	-0.803679	0.728852	1	REACTOME_PLATELET_CALCIUM_HOMEOSTASIS	-0.819801	0.704897	1
REACTOME_BILE_ACID_AND_BILE_SALT_METABOLISM	1.30268	0.148148	0.738606	REACTOME_BILE_ACID_AND_BILE_SALT_METABOLISM	0.83776	0.663609	1	REACTOME_BILE_ACID_AND_BILE_SALT_METABOLISM	-0.972363	0.504807	1
REACTOME_EGFR_DOWNREGULATION	-1.22488	0.208209	0.740682	REACTOME_EGFR_DOWNREGULATION	-0.955135	0.525375	1	REACTOME_EGFR_DOWNREGULATION	-0.59933	0.943078	1
REACTOME_NEGATIVE_REGULATION_OF_MET_ACTIVITY	-1.2116	0.22103	0.741224	REACTOME_NEGATIVE_REGULATION_OF_MET_ACTIVITY	-0.981043	0.47923	1	REACTOME_NEGATIVE_REGULATION_OF_MET_ACTIVITY	-0.719241	0.826204	1
WP_ENDOCHONDRAL_OSSIFICATION	-1.20781	0.21317	0.743246	WP_ENDOCHONDRAL_OSSIFICATION	-1.15988	0.269135	0.81496	WP_ENDOCHONDRAL_OSSIFICATION	-0.906953	0.596935	1
WP_EXERCISEINDUCED_CIRCADIAN_REGULATION	-1.16351	0.244783	0.744357	WP_EXERCISEINDUCED_CIRCADIAN_REGULATION	0.717694	0.850621	1	WP_EXERCISEINDUCED_CIRCADIAN_REGULATION	-1.0655	0.385267	1
REACTOME_AMINO_ACID_TRANSPORT_ACROSS_THE_PLASMA_MEMBRANE	-1.19775	0.228832	0.745686	REACTOME_AMINO_ACID_TRANSPORT_ACROSS_THE_PLASMA_MEMBRANE	0.842614	0.667084	1	REACTOME_AMINO_ACID_TRANSPORT_ACROSS_THE_PLASMA_MEMBRANE	-0.886316	0.61922	1
BIOCARTA_ECM_PATHWAY	1.32011	0.143582	0.746869	BIOCARTA_ECM_PATHWAY	1.75156	0.0159619	0.211785	BIOCARTA_ECM_PATHWAY	0.760377	0.788698	1
REACTOME_ADP_SIGNALLING_THROUGH_P2Y_PURINOCEPTOR_12	-1.20328	0.228754	0.7479	REACTOME_ADP_SIGNALLING_THROUGH_P2Y_PURINOCEPTOR_12	-1.27077	0.182342	0.721035	REACTOME_ADP_SIGNALLING_THROUGH_P2Y_PURINOCEPTOR_12	-0.626873	0.913453	1
REACTOME_SLC_MEDIATED_TRANSMEMBRANE_TRANSPORT	-1.164	0.168183	0.751608	REACTOME_SLC_MEDIATED_TRANSMEMBRANE_TRANSPORT	-1.27532	0.070133	0.727862	REACTOME_SLC_MEDIATED_TRANSMEMBRANE_TRANSPORT	-1.05159	0.379613	1
WP_IL9_SIGNALING_PATHWAY	-1.1667	0.257675	0.751824	WP_IL9_SIGNALING_PATHWAY	1.2542	0.199316	0.793302	WP_IL9_SIGNALING_PATHWAY	-0.784269	0.745307	1
WP_IL2_SIGNALING_PATHWAY	-1.16878	0.2125	0.754166	WP_IL2_SIGNALING_PATHWAY	1.05016	0.375729	0.873366	WP_IL2_SIGNALING_PATHWAY	0.914932	0.624294	1
REACTOME_CHAPERONIN_MEDIATED_PROTEIN_FOLDING	-1.22644	0.184801	0.758694	REACTOME_CHAPERONIN_MEDIATED_PROTEIN_FOLDING	-0.772105	0.805207	1	REACTOME_CHAPERONIN_MEDIATED_PROTEIN_FOLDING	-0.59486	0.963243	1
REACTOME_TNFR1_INDUCED_PROAPOPTOTIC_SIGNALING	-1.16962	0.264107	0.760717	REACTOME_TNFR1_INDUCED_PROAPOPTOTIC_SIGNALING	0.624474	0.905411	1	REACTOME_TNFR1_INDUCED_PROAPOPTOTIC_SIGNALING	-0.928154	0.564799	1
BIOCARTA_MAPK_PATHWAY	-1.18072	0.205285	0.762373	BIOCARTA_MAPK_PATHWAY	0.843178	0.705484	1	BIOCARTA_MAPK_PATHWAY	-0.644915	0.945559	1
BIOCARTA_TOLL_PATHWAY	-1.1776	0.258346	0.762996	BIOCARTA_TOLL_PATHWAY	0.760412	0.749894	1	BIOCARTA_TOLL_PATHWAY	-0.746324	0.78568	1
REACTOME_CLASS_B_2_SECRETIN_FAMILY_RECEPTORS	-1.18316	0.235064	0.764285	REACTOME_CLASS_B_2_SECRETIN_FAMILY_RECEPTORS	-1.54688	0.031974	0.608623	REACTOME_CLASS_B_2_SECRETIN_FAMILY_RECEPTORS	-0.908374	0.593037	1
REACTOME_MAPK_TARGETS_NUCLEAR_EVENTS_MEDIATED_BY_MAP_KINASES	-1.1709	0.253687	0.765895	REACTOME_MAPK_TARGETS_NUCLEAR_EVENTS_MEDIATED_BY_MAP_KINASES	0.647289	0.909691	1	REACTOME_MAPK_TARGETS_NUCLEAR_EVENTS_MEDIATED_BY_MAP_KINASES	1.23053	0.188998	1
REACTOME_METABOLISM_OF_LIPIDS	1.29273	0.0215724	0.766503	REACTOME_METABOLISM_OF_LIPIDS	1.08905	0.233073	0.874235	REACTOME_METABOLISM_OF_LIPIDS	1.09739	0.133739	1
BIOCARTA_INSULIN_PATHWAY	1.28624	0.179649	0.77111	BIOCARTA_INSULIN_PATHWAY	1.27843	0.191809	0.741208	BIOCARTA_INSULIN_PATHWAY	1.14961	0.280759	1
REACTOME_RNA_POLYMERASE_III_TRANSCRIPTION_INITIATION_FROM_TYPE_1_PROMOTER	1.25641	0.197394	0.771758	REACTOME_RNA_POLYMERASE_III_TRANSCRIPTION_INITIATION_FROM_TYPE_1_PROMOTER	1.1039	0.337553	0.88246	REACTOME_RNA_POLYMERASE_III_TRANSCRIPTION_INITIATION_FROM_TYPE_1_PROMOTER	1.07441	0.360334	1
WP_SPHINGOLIPID_METABOLISM_INTEGRATED_PATHWAY	1.27424	0.173594	0.778291	WP_SPHINGOLIPID_METABOLISM_INTEGRATED_PATHWAY	1.34931	0.14348	0.695409	WP_SPHINGOLIPID_METABOLISM_INTEGRATED_PATHWAY	0.82705	0.694975	1
REACTOME_GAMMA_CARBOXYLATION_HYPUSINE_FORMATION_AND_ARYLSULFATASE_ACTIVATION	1.25657	0.190531	0.780114	REACTOME_GAMMA_CARBOXYLATION_HYPUSINE_FORMATION_AND_ARYLSULFATASE_ACTIVATION	1.01111	0.428183	0.906192	REACTOME_GAMMA_CARBOXYLATION_HYPUSINE_FORMATION_AND_ARYLSULFATASE_ACTIVATION	0.834218	0.690357	1
WP_SPHINGOLIPID_METABOLISM_OVERVIEW	1.26873	0.182319	0.780141	WP_SPHINGOLIPID_METABOLISM_OVERVIEW	1.34773	0.139217	0.689432	WP_SPHINGOLIPID_METABOLISM_OVERVIEW	0.825807	0.707257	1
REACTOME_MYD88_MAL_TIRAP_CASCADE_INITIATED_ON_PLASMA_MEMBRANE	-1.13368	0.242175	0.780759	REACTOME_MYD88_MAL_TIRAP_CASCADE_INITIATED_ON_PLASMA_MEMBRANE	0.722711	0.895982	1	REACTOME_MYD88_MAL_TIRAP_CASCADE_INITIATED_ON_PLASMA_MEMBRANE	0.776157	0.882254	1
REACTOME_SIGNALING_BY_RECEPTOR_TYROSINE_KINASES	1.24436	0.0567736	0.782274	REACTOME_SIGNALING_BY_RECEPTOR_TYROSINE_KINASES	1.38475	0.0173625	0.639522	REACTOME_SIGNALING_BY_RECEPTOR_TYROSINE_KINASES	-0.894679	0.724495	1
REACTOME_HEMOSTASIS	1.2452	0.0516485	0.787661	REACTOME_HEMOSTASIS	0.958481	0.564949	0.95088	REACTOME_HEMOSTASIS	-0.945543	0.624174	1
REACTOME_NERVOUS_SYSTEM_DEVELOPMENT	1.2495	0.072069	0.789004	REACTOME_NERVOUS_SYSTEM_DEVELOPMENT	1.43409	0.0188198	0.560475	REACTOME_NERVOUS_SYSTEM_DEVELOPMENT	0.907966	0.75615	1
REACTOME_BINDING_AND_UPTAKE_OF_LIGANDS_BY_SCAVENGER_RECEPTORS	-1.0983	0.338776	0.791656	REACTOME_BINDING_AND_UPTAKE_OF_LIGANDS_BY_SCAVENGER_RECEPTORS	-1.17813	0.265903	0.785038	REACTOME_BINDING_AND_UPTAKE_OF_LIGANDS_BY_SCAVENGER_RECEPTORS	-1.00475	0.471024	1
WP_CALCIUM_REGULATION_IN_CARDIAC_CELLS	-1.08676	0.28184	0.791694	WP_CALCIUM_REGULATION_IN_CARDIAC_CELLS	-1.32732	0.0539226	0.703951	WP_CALCIUM_REGULATION_IN_CARDIAC_CELLS	-0.680617	0.960855	1
REACTOME_SIGNALING_BY_TGF_BETA_RECEPTOR_COMPLEX	1.2606	0.153957	0.792392	REACTOME_SIGNALING_BY_TGF_BETA_RECEPTOR_COMPLEX	1.7706	0.0090834	0.191731	REACTOME_SIGNALING_BY_TGF_BETA_RECEPTOR_COMPLEX	-0.771814	0.808443	1
REACTOME_AMINO_ACIDS_REGULATE_MTORC1	-1.06857	0.344088	0.793174	REACTOME_AMINO_ACIDS_REGULATE_MTORC1	-0.709982	0.899234	1	REACTOME_AMINO_ACIDS_REGULATE_MTORC1	-0.829745	0.71931	1
REACTOME_RNA_POLYMERASE_III_TRANSCRIPTION	1.25768	0.187416	0.79439	REACTOME_RNA_POLYMERASE_III_TRANSCRIPTION	1.10741	0.33175	0.897258	REACTOME_RNA_POLYMERASE_III_TRANSCRIPTION	1.07888	0.356589	1
REACTOME_REGULATION_OF_APC_C_ACTIVATORS_BETWEEN_G1_S_AND_EARLY_ANAPHASE	1.24548	0.203041	0.795429	REACTOME_REGULATION_OF_APC_C_ACTIVATORS_BETWEEN_G1_S_AND_EARLY_ANAPHASE	1.08861	0.343315	0.863753	REACTOME_REGULATION_OF_APC_C_ACTIVATORS_BETWEEN_G1_S_AND_EARLY_ANAPHASE	1.11213	0.312916	1
REACTOME_THROMBIN_SIGNALLING_THROUGH_PROTEINASE_ACTIVATED_RECEPTORS_PARS	-1.09455	0.330087	0.796131	REACTOME_THROMBIN_SIGNALLING_THROUGH_PROTEINASE_ACTIVATED_RECEPTORS_PARS	-0.869564	0.640192	1	REACTOME_THROMBIN_SIGNALLING_THROUGH_PROTEINASE_ACTIVATED_RECEPTORS_PARS	-0.638714	0.915117	1
REACTOME_TAK1_DEPENDENT_IKK_AND_NF_KAPPA_B_ACTIVATION	-1.08977	0.328643	0.796635	REACTOME_TAK1_DEPENDENT_IKK_AND_NF_KAPPA_B_ACTIVATION	-0.655906	0.922432	1	REACTOME_TAK1_DEPENDENT_IKK_AND_NF_KAPPA_B_ACTIVATION	-0.737985	0.820543	1
[truncated: 402 more rows]

## Sheet: cluster
* NbClust results. Method=ward.D2, distance=euclidean
		NES
[truncated: 44 more rows]
