# Supplementary material for: Distinct roles for MNK1 and MNK2 in social and cognitive behavior through kinase-specific regulation of the synaptic proteome and phosphoproteome
Source: Mol Psychiatry. 2026 Feb 13;31(6):3446–61. doi: 10.1038/s41380-026-03483-w (PMC13190234; doi:10.1038/s41380-026-03483-w)
Supplement: Supplementary file 5 — Supplementary Table 4 [file 41380_2026_3483_MOESM5_ESM.xlsx]

## Sheet: TMT all proteins
protein names		normalized protein expression																LogFC over WT			p-value / WT			adjusted p-value / WT
id	GeneName	SYP_WT	SYP_WT	SYP_WT	SYP_WT	SYP_MNK1KO	SYP_MNK1KO	SYP_MNK1KO	SYP_MNK1KO	SYP_MNK2KO	SYP_MNK2KO	SYP_MNK2KO	SYP_MNK2KO	SYP_MNKDKO	SYP_MNKDKO	SYP_MNKDKO	SYP_MNKDKO	logFC.SYP_MNK1KO.over.SYP_WT	logFC.SYP_MNK2KO.over.SYP_WT	logFC.SYP_MNKDKO.over.SYP_WT	P.Value.SYP_MNK1KO.over.SYP_WT	P.Value.SYP_MNK2KO.over.SYP_WT	P.Value.SYP_MNKDKO.over.SYP_WT	adj.P.Val.SYP_MNK1KO.over.SYP_WT	adj.P.Val.SYP_MNK2KO.over.SYP_WT	adj.P.Val.SYP_MNKDKO.over.SYP_WT
0610009B22Rik	Q8R3W2	-1.7	-0.8	-0.54	0.12	-0.68	-1.78	0.14	-0.26	1	-0.33	-0.09	-1.53	0.6	0.42	-0.44	-0.46	0.085	0.4925	0.76	0.868912	0.412619	0.114639	1	0.996511	0.717287
0610010K14Rik	D3Z687	-0.08	1.15	-0.72	-0.68	1.35	0.08	-0.1	-0.82	-0.52	-0.28	-0.78	0.63	-0.08	-0.53	-0.15	-0.16	0.21	-0.155	-0.1475	0.715284	0.755239	0.730327	1	0.996511	0.958635
0610012G03Rik	A0A0J9YTR2	2.02	1.73	1.04	1.16	0.83	1.64	0.97	1.11	1.26	-0.46	1.27	2.49	2.92	-1.21	1.15	1.69	-0.35	-0.3475	-0.35	0.250757	0.563536	0.666256	1	0.996511	0.950424
1110059G10Rik	Q8K039	-3.59	-4.54	-6.47	-10.05	-5.5	-5.18	-13.84	-10.44	-3.43	-3.02	-6.47	-3.71	-2.02	-5.38	-6.03	-8.29	-2.5775	2.005	0.7325	0.270406	0.192102	0.669877	1	0.996511	0.952558
1110065P20Rik	V9GXF1	-2.02	-2.04	-0.23	-0.42	-2.95	-0.9	-0.67	-0.06	1.56	0.24	0.01	-1.75	2.45	-1.55	-0.71	-0.36	0.0325	1.1925	1.135	0.964067	0.144061	0.226475	1	0.996511	0.787447
1500009L16Rik	A0A1W2P6X0	1.91	2.18	2.32	2.16	1.36	2.03	1.93	2.52	1.23	1.84	2.38	2.22	2.11	0.24	2.73	2.76	-0.1825	-0.225	-0.1825	0.491004	0.432424	0.741729	1	0.996511	0.958881
1600014C10Rik	Q8WUR0	-2.03	-2.22	1.06	-0.42	-2.02	-1.57	0.1	0.51	-2.23	-0.55	-0.75	-1.84	-2.01	-1.78	-0.72	-0.06	0.1575	-0.44	-0.24	0.85914	0.579953	0.766232	1	0.996511	0.964134
1700025G04Rik	Q8K207	1.31	1.35	1.63	1.6	1.16	1.42	1.06	1.46	0.2	-0.37	1.63	1.58	0.67	-2.48	1.39	1.39	-0.1975	-0.7125	-1.23	0.279916	0.159826	0.165576	1	0.996511	0.758837
1700037H04Rik	H7BXB9	-0.71	-0.82	-0.25	-0.26	-0.38	-0.93	0.11	0.08	-0.98	0.04	-0.14	-0.63	-0.63	-0.57	-0.17	-0.16	0.23	0.0825	0.1275	0.43159	0.77343	0.592333	1	0.996511	0.929843
2210016F16Rik	G3X8U3	-0.69	-0.8	-0.42	-0.36	-0.76	-1.19	-0.46	-0.32	-1.12	0.21	-0.54	-1.07	-1.41	-0.66	-0.6	-0.44	-0.115	-0.0625	-0.21	0.628967	0.847821	0.43894	1	0.996511	0.883205
2310061I04Rik	B8JJ66	-0.06	-0.19	-0.69	-0.89	-0.02	-0.22	-1.37	-0.9	0.35	-1.13	-0.85	-0.04	0.02	-0.66	-1.37	-0.6	-0.17	0.04	-0.195	0.633095	0.916728	0.575755	1	0.996755	0.926728
2410002F23Rik	Q3TE80	-1.46	-1.31	-2.08	-2.45	-0.94	-1.97	-1.12	-2.3	-1.77	-2.6	-2.28	-1.57	-1.74	-1.81	-1.86	-1.85	0.2425	-0.23	0.01	0.547536	0.514996	0.972105	1	0.996511	0.992865
2410004B18Rik	Q9CWU4	-2.24	-2.69	-2.76	-2.62	-3.2	-2.34	-4.1	-3.86	-0.75	-1.45	-2.97	-2	-0.01	-2.88	-2.94	-3.49	-0.7975	0.785	0.2475	0.0666505	0.111303	0.731411	1	0.996511	0.958635
2900026A02Rik	A0A1D5RLN6	-0.17	0.64	-0.82	-1.11	0.54	0.07	-0.02	-0.02	0.84	-0.15	0.18	0.09	1.16	-0.3	2.22	-0.83	0.5075	0.605	0.9275	0.214396	0.174701	0.219859	1	0.996511	0.787447
2900026A02Rik	A0A1B0GR85	0.57	0.32	0.99	1.24	0.2	0.64	0.69	1.35	1.05	0.64	0.79	0.56	1.39	0.27	0.77	0.59	-0.06	-0.02	-0.025	0.846374	0.93728	0.937626	1	0.996755	0.989767
3110082I17Rik	Q9CXL3	-2.06	-3.28	-1.08	-0.49	-3.51	-3.16	-1.17	-1.52	-4.99	0.87	-0.93	-3.24	-2.41	-3.66	-0.49	-0.65	-0.6125	-0.345	-0.075	0.43068	0.786702	0.931494	1	0.996511	0.989713
4931406C07Rik	Q91V76	1.23	0.12	1.26	0.82	0.8	1.05	1.63	1.12	-0.22	0.49	1.4	1.04	-0.55	0.5	0.88	1.05	0.2925	-0.18	-0.3875	0.361386	0.669161	0.374327	1	0.996511	0.859424
4933402D24Rik	Q9D4D3	0.36	1.34	1.06	0.77	0.64	0.12	0.72	0.53	0.4	0.13	0.82	0.81	0.05	-0.23	0.43	0.44	-0.38	-0.3425	-0.71	0.166026	0.242512	0.0317412	1	0.996511	0.641974
4933427D14Rik	A0A0N4SUT6	1.74	0.11	1.34	1.16	0.3	1.65	0.73	0.84	0.72	0.23	0.93	1.62	2.72	0.43	1.66	2.13	-0.2075	-0.2125	0.6475	0.62334	0.621625	0.259406	1	0.996511	0.812337
4933434E20Rik	H7BX33	0.16	0.11	0.71	0.6	0.42	0.24	0.99	0.58	0.45	0.96	0.73	0.27	-0.35	-0.66	-0.61	0.91	0.1625	0.2075	-0.5725	0.499525	0.401245	0.16456	1	0.996511	0.758837
5031439G07Rik	B1APX2	0.27	0.38	0.11	-0.02	0.56	0.22	0.17	-0.1	0.52	0.17	0.24	0.56	0.4	0.32	0.06	0.1	0.0275	0.1875	0.035	0.888636	0.33621	0.856773	1	0.996511	0.976225
5730455P16Rik	Q9CYI0	-0.32	0.25	-0.64	-1.78	0.67	-0.33	-1.69	-2.05	0.2	-1.26	-1.15	-0.12	-0.84	0.41	-0.57	-0.92	-0.2275	0.04	0.1425	0.741579	0.938788	0.772066	1	0.996755	0.965933
6030458C11Rik	Q8BGC1	-1.14	-0.35	-1.34	-1.28	0.45	-1.05	-0.76	-1.37	0.28	-0.86	-1.21	-0.97	-0.63	0.24	-1.4	-1.51	0.345	0.3375	0.2025	0.430618	0.394534	0.648411	1	0.996511	0.946083
6820408C15Rik	Q8BJX2	0.14	0.42	0.21	-0.21	0.87	-0.12	-0.26	-0.23	-0.19	0.17	0.03	-0.59	-0.49	0.82	0.03	0.07	-0.075	-0.285	-0.0325	0.801626	0.253009	0.916317	1	0.996511	0.986556
8030462N17Rik	Q0VAW6	0.16	0.35	-0.25	0.15	-0.09	0.28	-1.39	-0.78	0.24	-0.09	-0.71	0.54	-0.46	-0.09	-1.23	-0.77	-0.5975	-0.1075	-0.74	0.135983	0.722296	0.0290038	1	0.996511	0.637553
A830018L16Rik	B7ZN57	-0.57	0.2	0.22	0.44	0.75	-0.74	0.19	0.31	0.62	0.67	0.1	1.02	-0.69	0.99	-0.85	0.07	0.055	0.53	-0.1925	0.880484	0.102856	0.669881	1	0.996511	0.952558
Aaas	P58742	0.3	0.34	0.03	0.42	0.86	0.22	1.08	0.64	-0.1	-0.09	0.21	0.17	0.47	1.09	0.62	0.49	0.4275	-0.225	0.395	0.083581	0.237794	0.0988837	1	0.996511	0.698156
Aacs	Q9D2R0	-0.34	-0.43	-0.22	-0.42	-0.04	-0.39	-0.51	0.01	-0.25	0.25	0.25	0.17	-0.06	0.09	0.12	0.22	0.12	0.4575	0.445	0.513658	0.0357418	0.0298827	1	0.996511	0.640893
Aagab	Q8R2R3	-1.58	-0.66	-1.18	-0.58	-1.4	-1.16	-0.82	-0.86	-0.82	-0.11	-0.55	-1.08	-0.73	-0.66	-0.91	-0.93	-0.06	0.36	0.1925	0.827743	0.271113	0.48072	1	0.996511	0.893906
Aak1	Q3UHJ0	0.09	0.3	0.36	0.3	0.11	0.11	0.21	0.02	-0.12	-0.13	0	0.15	-0.21	0.2	-0.03	-0.16	-0.15	-0.2875	-0.3125	0.327326	0.115407	0.124248	1	0.996511	0.721448
Aak1	A0A571BEI2	-0.69	-0.33	-0.08	0.16	-0.75	-0.84	0.49	0.16	0.53	0.44	0.22	-0.46	0.87	-0.95	-0.2	0.21	1.96262e-16	0.4175	0.2175	1	0.18228	0.59498	1	0.996511	0.929843
Aak1	A0A571BDM4	1.3	0.69	-1.14	0.39	0.68	0.73	0.27	0.64	0.77	0.89	-0.2	1.84	0.08	0.39	0.85	0.64	0.27	0.515	0.18	0.584401	0.4084	0.723468	1	0.996511	0.958398
Aamdc	D3Z442	-0.99	-0.38	-0.18	-0.3	-0.07	-1.14	-0.17	0.19	-0.8	-0.58	-0.01	-0.84	-0.5	0.05	-0.3	-0.64	0.165	-0.095	0.115	0.621901	0.731771	0.662845	1	0.996511	0.94972
Aamp	J3QN89	-0.31	-0.36	-1.25	-1.16	-0.43	-0.43	-1.79	-1.31	-0.33	-0.94	-1.25	-0.2	-0.42	-0.34	-1.01	-1.11	-0.22	0.09	0.05	0.583464	0.796022	0.877809	1	0.996511	0.979626
Aar2	Q9D2V5	0.29	0.71	0.44	0.64	0.96	0.14	0.45	0.25	0.5	0.8	0.37	0.64	0.04	0.78	-0.21	0.77	-0.07	0.0575	-0.175	0.757505	0.762691	0.547981	1	0.996511	0.912571
Aars1	Q8BGQ7	-0.21	-0.27	-0.19	-0.34	-0.71	-0.38	-0.34	-0.31	-0.3	-0.11	-0.27	-0.21	-0.43	-0.22	-0.66	-0.73	-0.1825	0.03	-0.2575	0.273921	0.848197	0.206709	1	0.996511	0.785338
Aars2	Q14CH7	0.11	0.22	0.28	0.33	0.01	0.25	0.33	0.45	0.98	0.67	0.65	0.09	0.88	0.74	0.29	0.26	0.025	0.3625	0.3075	0.8783	0.13502	0.180994	1	0.996511	0.775542
Aarsd1	Q3THG9	-1.38	-0.89	-0.85	-1.07	-0.68	-1.41	-0.69	-0.86	-1.3	-0.34	-0.68	-1.37	-0.97	-0.39	-0.91	-0.75	0.1375	0.125	0.2925	0.553205	0.664035	0.215867	1	0.996511	0.787447
Aasdhppt	Q9CQF6	-1.92	-2.01	0.37	-0.72	-2.05	-2.53	-0.74	-0.28	-2.5	-0.1	-0.37	-1.96	-2.16	-2.25	-0.7	-0.49	-0.33	-0.1625	-0.33	0.639897	0.82599	0.622305	1	0.996511	0.938628
Aass	Q99K67	1.93	1.13	0.91	1.16	1	1.66	-0.28	0.87	1.14	0.56	1.04	1.26	1.05	0.6	0.12	0.21	-0.47	-0.2825	-0.7875	0.292226	0.330971	0.0321401	1	0.996511	0.641974
Aatf	Q9JKX4	1.01	1.15	1.69	1.65	0.65	0.35	1.45	1.39	0.4	0.6	1.98	0.77	0.18	1.04	2.11	2.35	-0.415	-0.4375	0.045	0.212524	0.269531	0.927571	1	0.996511	0.989337
Aatk	B1AZF9	0.18	0.45	0.63	0.22	0.61	0.21	0.91	0.44	-0.16	0.16	0.59	0.4	-0.06	0.5	0.51	0.73	0.1725	-0.1225	0.05	0.419352	0.592089	0.833942	1	0.996511	0.975371
Abat	P61922	0.19	-0.07	0.23	1.17	-0.16	-0.12	1.18	0.66	-0.15	0.67	0.39	-0.2	-0.43	0.01	0.39	0.34	0.01	-0.2025	-0.3025	0.979974	0.555123	0.375626	1	0.996511	0.859611
Abca1	P41233	0.94	0.83	0.3	0.29	0.94	0.86	0.31	0.04	0.52	-0.08	0.12	0.74	0.32	0.19	0.17	0.57	-0.0525	-0.265	-0.2775	0.851186	0.338903	0.258631	1	0.996511	0.812074
Abca2	A2AJ26	-0.64	-0.69	-0.13	-0.48	0.02	-0.66	-0.22	-0.24	-0.76	0.02	0.02	-0.26	-0.5	-0.67	0.04	-0.01	0.21	0.24	0.2	0.342893	0.345681	0.433803	1	0.996511	0.879859
Abca3	Q8R420	0.14	0.08	0.65	0.82	0.87	0.68	0.92	0.7	0.23	0.52	0.77	0.61	0.02	0.51	0.79	0.93	0.37	0.11	0.14	0.1173	0.652035	0.630686	1	0.996511	0.941132
Abca5	Q8K448	-0.15	0.32	0.44	0.14	0.63	-0.22	0.21	0.08	-0.39	-0.02	0.18	-0.3	-0.65	0.49	-0.04	0.13	-0.0125	-0.32	-0.205	0.957614	0.171323	0.482848	1	0.996511	0.893925
Abca6	Q8K441	-1.67	-0.72	-1.86	-2.84	-0.45	-1.5	-3.14	-3.45	-2.55	-2.25	-2.53	-2.57	-2.57	-0.75	-2.9	-2.78	-0.3625	-0.7025	-0.4775	0.630643	0.12103	0.441599	1	0.996511	0.883549
Abca7	E9Q6G4	1.52	2.36	1.9	2.17	-1.69	-1.92	-4	-4.2	1.38	2.95	1.61	1.4	1.01	2.03	1.39	1.71	-4.94	-0.1525	-0.4525	3.6647e-05	0.70331	0.154826	0.0835002	0.996511	0.750763
Abca8b	Q8K440-2	1.08	1.11	0.82	0.81	0.87	0.8	1.65	0.79	1	1.11	1.03	0.93	0.26	0.78	0.84	1.79	0.0725	0.0625	-0.0375	0.762402	0.712237	0.90992	1	0.996511	0.986458
Abca9	Q8K449	-1.25	-1.14	-2.01	-0.85	-1.4	-0.94	-2.13	-1.58	-0.96	-1.36	-1.36	-1.19	-1.37	-0.89	-2.17	-2.18	-0.2	0.095	-0.34	0.557543	0.733031	0.393675	1	0.996511	0.865775
Abcb10	Q9JI39	-0.3	-0.08	0.06	0.27	0.26	-0.23	0.29	0.22	-0.19	0.39	0.46	-0.51	-0.32	0.05	-0.27	-0.1	0.1475	0.05	-0.1475	0.474105	0.856228	0.482929	1	0.996511	0.893925
Abcb11	J3QNY6	-2.29	-2.83	-1.49	-0.51	-2.93	-1.23	-1.59	-0.18	-1.9	-2.98	-1.44	-3.5	-0.85	-2.01	-2.38	-2.06	0.2975	-0.675	-0.045	0.667241	0.302829	0.935744	1	0.996511	0.989767
Abcb1a	P21447	0.04	0.09	0.4	0.46	0.14	-0.07	0.15	-0.11	0.05	0.29	0.59	0.15	0.3	-0.64	0.23	0.33	-0.22	0.0225	-0.1925	0.230529	0.912485	0.493764	1	0.996744	0.89758
Abcb6	Q9DC29	-0.85	-0.51	-0.39	-0.85	-0.39	-0.39	-0.47	-1.01	-0.22	-1.08	-0.65	-0.45	0.34	-0.77	-0.8	-0.49	0.085	0.05	0.22	0.694861	0.837296	0.47462	1	0.996511	0.891711
Abcb7	Q61102	0.12	0.18	0.32	0.5	0.15	0.32	0.24	0.17	0.36	-0.03	0.35	-0.09	0.32	-0.07	-0.05	0.28	-0.06	-0.1325	-0.16	0.70479	0.508988	0.433692	1	0.996511	0.879859
Abcb8	Q9CXJ4	-0.03	0.12	-0.21	0.05	-0.25	-0.1	0	-0.17	0.29	-0.38	-0.04	-0.11	0.34	0.38	-0.16	0.06	-0.1125	-0.0425	0.1725	0.477423	0.833998	0.413217	1	0.996511	0.874811
Abcb9	Q9JJ59	-0.13	0.28	0.23	0.28	0.26	0.1	0.45	0.2	-0.36	-0.1	0.31	-0.03	-0.05	0.04	0.16	0.57	0.0875	-0.21	0.015	0.616427	0.335487	0.945592	1	0.996511	0.992376
Abcc1	O35379	0.41	1.08	0.31	0.57	1.14	0.99	0.5	0.7	0.68	1.08	0.49	0.51	0.76	1.14	0.29	0.37	0.24	0.0975	0.0475	0.330246	0.691355	0.865441	1	0.996511	0.977956
Abcc4	E9Q236	0.26	0.05	0.76	0.21	0.24	0.41	1.33	0.37	-0.2	-0.27	0.94	0.45	-0.41	-0.08	0.98	0.62	0.2675	-0.09	-0.0425	0.373068	0.781788	0.903375	1	0.996511	0.985087
Abcc5	Q9R1X5	-0.77	-0.17	0.98	0.54	-0.8	-0.22	-0.28	0.27	2.5	0.4	0.5	-0.6	3.85	-0.67	1.47	1.42	-0.4025	0.555	1.3725	0.347358	0.42841	0.152588	1	0.996511	0.750422
Abcc8	B2RUS7	0.58	0.92	0.84	0.69	1.11	0.59	0.19	0.38	0.57	0.84	0.66	0.56	0.72	0.65	0.33	0.57	-0.19	-0.1	-0.19	0.420819	0.568005	0.333016	1	0.996511	0.845601
Abcd1	P48410	0.76	0.56	0.69	0.38	1.26	0.57	0.74	0.51	0.82	1.4	0.69	1.23	0.47	1.06	0.02	0.8	0.1725	0.4375	-0.01	0.4319	0.0766121	0.969961	1	0.996511	0.992767
Abcd2	Q61285	-0.17	0.59	0.97	0.8	1.04	0.53	1.33	0.89	0.52	0.88	1.16	0.51	0.71	0.81	1.01	1.12	0.4	0.22	0.365	0.204725	0.472781	0.223677	1	0.996511	0.787447
Abcd3	P55096	0	0.33	0.65	0.51	0.61	0.33	0.96	0.47	1.09	0.93	0.37	0.36	1.33	1.05	0.84	0.6	0.22	0.315	0.5825	0.329325	0.239478	0.0390491	1	0.996511	0.658454
Abcd4	O89016	-0.53	-0.42	0.65	0.19	0.28	-0.04	0.26	0.39	-0.1	-0.2	0.38	0.03	-0.36	0.28	1.05	1.74	0.25	0.055	0.705	0.400432	0.857935	0.180965	1	0.996511	0.775542
Abce1	P61222	-0.93	-0.6	-1.42	-1.51	-0.81	-0.94	-1.5	-1.5	-0.77	-0.78	-1.38	-0.69	-1.04	-0.1	-1.88	-1.71	-0.0725	0.21	-0.0675	0.798092	0.459519	0.87643	1	0.996511	0.979626
Abcf1	Q6P542	-1.25	-1.46	-0.63	-0.77	-1.16	-1.02	-0.86	-0.86	-1.59	-0.42	-0.56	-1.17	-1.31	-1.22	-0.61	-0.78	0.0525	0.0925	0.0475	0.818611	0.781256	0.865068	1	0.996511	0.977944
Abcf2	Q99LE6	0.27	-0.27	-0.52	-0.61	-0.17	-0.12	-0.67	-0.48	-0.23	-0.02	-0.73	0	-0.44	0.07	-0.86	-0.91	-0.0775	0.0375	-0.2525	0.756309	0.891337	0.425554	1	0.996511	0.877887
Abcf3	Q8K268	0.14	0.27	0.56	0.39	-0.05	0.11	0.22	0.31	-0.23	0.4	0.32	0.34	0.18	0.05	0.01	0.13	-0.1925	-0.1325	-0.2475	0.277157	0.538568	0.200084	1	0.996511	0.78004
Abcg1	Q64343	0.46	0.51	0.7	0.46	0.29	0.81	-0.07	0.43	1.36	-0.97	0.03	0.2	1.9	-0.49	0.7	0.52	-0.1675	-0.3775	0.125	0.446062	0.413367	0.787982	1	0.996511	0.968587
Abcg2	S4R2E1	0.24	0.73	0.62	0.44	0.71	0.37	0.5	0.3	0.39	0.32	0.77	0.58	0.21	0.71	0.39	0.58	-0.0375	0.0075	-0.035	0.837804	0.969796	0.868176	1	0.996811	0.978872
Abcg4	Q91WA9	1.01	0.69	0.39	1.22	0.7	0.76	0.35	1.23	2.37	2.58	1	1.48	1.95	2.87	1.59	1.45	-0.0675	1.03	1.1375	0.798525	0.0275791	0.0114312	1	0.996511	0.566767
Abhd10	Q6PE15-2	0.49	0.31	-0.01	0.16	-0.05	0.24	0.08	0.07	0.25	0.28	-0.15	0.21	0.19	0.73	-0.54	-0.51	-0.1525	-0.09	-0.27	0.38821	0.650511	0.418699	1	0.996511	0.87558
Abhd11	Q8K4F5	0.4	0.65	1.37	1.85	0.24	0.33	0.6	1.26	0.45	0.85	1.16	0.27	0.18	0.02	0.89	0.89	-0.46	-0.385	-0.5725	0.250164	0.31949	0.168673	1	0.996511	0.759484
Abhd12	Q99LR1	0.25	-0.17	-0.85	-0.78	0.18	0.29	-0.64	-0.64	-0.16	-0.5	-0.86	0.4	0.05	-0.6	0.09	-0.79	0.185	0.1075	0.075	0.6003	0.76815	0.827472	1	0.996511	0.973757
Abhd14b	E9QN99	0.19	-0.55	-1.45	-1.2	-0.69	0.15	-1.07	-1.49	-1	-0.98	-1.76	-0.52	-0.84	-0.32	-1.6	-1.47	-0.0225	-0.3125	-0.305	0.961743	0.468764	0.500371	1	0.996511	0.900792
Abhd16a	Q9Z1Q2	-0.16	-0.13	0.28	0.2	0.26	-0.18	0.49	0.33	0.14	0.06	0.26	-0.31	0.75	-0.14	0.42	0.29	0.1775	-0.01	0.2825	0.408261	0.961942	0.275658	1	0.996755	0.822084
Abhd17a	Q99JW1	-0.16	-0.27	0.64	0.48	-0.26	0.33	0.05	0.39	2.17	0.07	0.52	-0.04	3.15	-1.72	0.64	0.26	-0.045	0.5075	0.41	0.870363	0.341525	0.65736	1	0.996511	0.948659
Abhd17b	Q7M759	-0.02	0.42	-0.1	-0.13	0.63	0.4	0.57	0.18	0.26	-1.21	-0.08	0.52	0.17	0.71	0.02	0.29	0.4025	-0.17	0.255	0.0677529	0.661708	0.297392	1	0.996511	0.826603
Abhd17c	Q8VCV1	0.47	0.85	0.65	1.18	0.77	0.6	0.81	1.03	1.19	2.65	0.76	0.62	0.39	1.56	0.47	0.84	0.015	0.5175	0.0275	0.941885	0.277226	0.930426	1	0.996511	0.989713
Abhd3	Q91ZH7	-0.45	-1.13	-1.37	-1.13	-0.85	0.14	-0.43	-0.99	-0.17	-0.92	-1.17	0.14	0.08	-0.71	-0.82	-0.66	0.4875	0.49	0.4925	0.149241	0.194349	0.126311	1	0.996511	0.721505
Abhd4	Q3U7M5	0.34	0.31	0.27	0.77	0.46	0.45	1.03	0.79	0.55	0.47	0.77	0.38	0.06	0.64	0.15	0.49	0.26	0.12	-0.0875	0.237077	0.544585	0.700784	1	0.996511	0.956416
Abhd5	Q9DBL9	0	0.19	-0.18	0.44	-0.33	0.13	0.4	0.16	0.49	0.43	-0.04	0.08	0.01	-0.24	-0.45	0.46	-0.0225	0.1275	-0.1675	0.919933	0.569374	0.530186	1	0.996511	0.908663
Abhd6	Q8R2Y0-2	1.08	0.2	0.6	1.3	0.48	0.95	0.92	1.47	1.08	0.81	1.02	1.41	0.52	1.09	0.96	0.77	0.16	0.285	0.04	0.612144	0.333421	0.890908	1	0.996511	0.98183
Abi1	B7ZCU3	1.38	1.55	1.29	1.26	1.56	1.13	1.07	1.29	-0.92	-1.4	1.71	1.5	-0.34	-1.63	0.95	1.86	-0.1075	-1.1475	-1.16	0.545031	0.144223	0.121712	1	0.996511	0.721448
Abi1	B7ZCU4	1.33	1.04	1.32	1.13	1	1.35	0.68	1.15	0.99	0.71	1.18	1.26	0.69	1.66	0.98	0.65	-0.16	-0.17	-0.21	0.419922	0.39384	0.443498	1	0.996511	0.883549
Abi2	A0A087WPP8	0.98	0.44	0.66	0.71	0.21	1.14	0.34	0.33	1.7	-0.38	0.56	1.04	1.86	-0.12	0.44	0.11	-0.1925	0.0325	-0.125	0.453031	0.939334	0.774206	1	0.996755	0.966062
Abi2	A0A087WRS3	-4.4	-3.92	-4.41	-1.45	-5.51	-3.5	-4.2	-2.3	-0.54	-3.09	-2.61	-3.7	1.13	-7.74	-2.33	-3.58	-0.3325	1.06	0.415	0.705643	0.252325	0.81169	1	0.996511	0.972642
Abi3	Q8BYZ1	-0.94	-1.6	-0.79	-0.66	-1.08	-1.22	-0.93	-0.78	-1.65	-0.51	-0.59	-1.34	-1.7	-1.56	-1.53	-1.56	-0.005	-0.025	-0.59	0.983612	0.942009	0.0383542	1	0.996755	0.658454
Abl1	P00520-2	-0.21	0.16	0.51	0.59	-0.7	0.13	0.15	0.47	1.07	0.32	0.58	0.12	1.9	-0.05	0.94	0.54	-0.25	0.26	0.57	0.42319	0.374248	0.205353	1	0.996511	0.783452
Abl2	F8VQH0	-0.02	0.17	0.14	-0.03	-0.09	0.17	-0.16	0.05	0.69	0.04	0.19	0.43	0.77	0.03	0.29	-0.07	-0.0725	0.2725	0.19	0.645381	0.197936	0.429471	1	0.996511	0.879165
Ablim1	E9Q9C0	0.3	0.34	0.87	0.96	0.12	0.38	0.73	0.89	0.64	1.23	0.89	0.46	0.92	0.46	0.68	0.89	-0.0875	0.1875	0.12	0.732362	0.477115	0.621452	1	0.996511	0.938628
Ablim2	Q8BL65	0.78	0.63	0.51	0.78	0.4	0.75	0.25	0.55	0.48	0.7	0.5	0.6	0.58	-0.06	0.33	0.02	-0.1875	-0.105	-0.4575	0.298951	0.532432	0.058729	1	0.996511	0.661738
Ablim2	E9Q0W6	1.58	1.23	1.48	1.68	1.03	0.47	1.17	0.97	0.67	0.99	1.03	1.19	0.51	1.07	1.59	1.34	-0.5825	-0.5225	-0.365	0.020212	0.0251322	0.205306	1	0.996511	0.783452
Ablim2	Q8BL65-4	1.98	2.76	1.1	1.64	1.28	0.25	0.7	0.49	1.72	0.08	0.95	1.99	1.38	1.38	1.38	1.57	-1.19	-0.685	-0.4425	0.0132942	0.204486	0.225849	1	0.996511	0.787447
Ablim3	Q69ZX8	0.7	0.37	0.36	0.28	0.03	0.72	0.21	-0.14	0.76	0.23	0.53	1.05	1.32	-0.21	0.24	0.55	-0.2225	0.215	0.0475	0.342948	0.361483	0.887717	1	0.996511	0.980447
Abr	A0A571BG95	-0.36	-0.47	0.42	0.88	-1.52	-0.55	-0.21	0.89	1.42	2.7	0.07	0.45	0.84	0.08	1.23	0.94	-0.465	1.0425	0.655	0.402453	0.116671	0.121966	1	0.996511	0.721448
Abr	Q5SSL4	0.37	0.31	0.03	-0.02	0.39	0.62	0.2	0.09	0	0.04	0.22	0.59	-0.15	0.04	-0.07	-0.08	0.1525	0.04	-0.2375	0.431996	0.84875	0.225111	1	0.996511	0.787447
Abr	Q5SSL4-4	0.35	-0.28	0.07	-0.16	0.51	0.52	0.22	1.21	0.16	0.43	-0.53	-0.88	0.15	1.02	-0.17	-0.03	0.62	-0.2	0.2475	0.0390912	0.549283	0.434186	1	0.996511	0.880349
Abracl	A0A1W2P7X0	-3.53	-4.09	-2.88	-2.86	-3.6	-3.65	-2.19	-2.64	-5.58	-3.02	-3.14	-3.15	-4.85	-5.63	-3.1	-2.43	0.32	-0.3825	-0.6625	0.469441	0.546419	0.372605	1	0.996511	0.859424
Abraxas2	Z4YJY0	0.27	0.03	-0.31	-0.06	-0.39	0.21	-1.03	-0.22	0.14	0.25	0.06	0.09	0.36	-0.03	-0.36	-0.56	-0.34	0.1525	-0.13	0.253126	0.423368	0.622468	1	0.996511	0.938628
Abtb2	Q7TQI7	-0.15	0.47	0.29	0.81	0.21	0.36	0.47	0.3	0.45	0.36	0.17	0.16	0.14	0.42	0.13	0.93	-0.02	-0.07	0.05	0.929915	0.770851	0.863346	1	0.996511	0.977235
Acaa1a	Q921H8	0.43	0.44	0.61	0.72	0.54	0.2	1.04	0.78	0.71	1.25	0.71	0.66	0.64	1.23	0.91	0.98	0.09	0.2825	0.39	0.679475	0.188971	0.0825358	1	0.996511	0.68865
Acaa2	Q8BWT1	1.07	0.89	0.39	0.8	0.72	0.91	0.88	0.5	0.41	0.24	0.5	0.74	0.28	0.28	0.23	0.45	-0.035	-0.315	-0.4775	0.86323	0.171237	0.0460592	1	0.996511	0.658454
Acaca	Q5SWU9	0.27	0.25	0.5	0.49	0.58	0.43	0.35	0.48	0.4	0.51	0.64	0.35	0.13	0.79	0.34	0.32	0.0825	0.0975	0.0175	0.594155	0.571513	0.934217	1	0.996511	0.989767
Acad11	A0A0R4J0I6	-0.32	0.24	0.14	0.3	0.55	0.3	0.83	0.23	1.09	0.55	0.27	0.55	1.46	0.41	0.43	0.32	0.3875	0.525	0.565	0.105112	0.0584818	0.098148	1	0.996511	0.698156
Acad12	D3Z7X0	0.22	0.5	0.59	1.2	0.4	-0.01	1.87	0.68	-0.07	0.15	1.33	-0.26	0.2	0.2	0.01	0.87	0.1075	-0.34	-0.3075	0.800425	0.400215	0.312098	1	0.996511	0.834523
Acad8	D3YTT4	-0.16	-0.02	0.02	0.34	-0.12	-0.07	0.22	0.14	-0.29	0.01	0.33	-0.45	-0.44	0.32	-0.1	-0.29	-0.0025	-0.145	-0.1725	0.988859	0.537953	0.472496	1	0.996511	0.891144
Acad9	Q8JZN5	0.1	0.36	0.3	0.37	-0.01	0.35	0.28	0.29	0.32	-0.03	0.49	0.11	0.45	0.16	0.03	0.07	-0.055	-0.06	-0.105	0.735343	0.751136	0.584796	1	0.996511	0.927734
Acadl	A0A0R4J083	0.23	-0.07	0.5	1.03	0.27	0.26	1.06	0.78	0.03	0.34	0.83	0.07	-0.02	-0.18	0.44	0.8	0.17	-0.105	-0.1625	0.578016	0.729321	0.621668	1	0.996511	0.938628
Acadm	P45952	0.9	0.69	0.39	0.68	0.72	0.68	0.88	0.54	0.87	0.02	0.67	0.71	0.48	0.89	0.32	0.57	0.04	-0.0975	-0.1	0.819192	0.687806	0.642766	1	0.996511	0.94365
Acads	Q07417	1.06	0.82	0.97	1.44	0.54	0.94	1.62	1.62	0.61	1.1	1.62	1.02	0.4	-0.25	0.93	1.04	0.1075	0.015	-0.5425	0.717664	0.954612	0.124694	1	0.996755	0.721448
Acadsb	Q9DBL1	0.1	-0.1	0.1	0.46	-0.29	-0.16	0.59	0.08	-0.34	0.3	0.37	-0.07	-0.14	-0.06	0.06	0.41	-0.085	-0.075	-0.0725	0.725649	0.748493	0.741873	1	0.996511	0.958932
Acadvl	P50544	0.78	0.81	0.2	0.26	0.71	0.68	0.54	0.17	0.39	-0.05	0.48	0.6	0.25	0.31	0.09	0.22	0.0125	-0.1575	-0.295	0.955899	0.52163	0.204035	1	0.996511	0.782817
Acan	Q61282	-0.03	-0.02	-1.03	-0.83	-0.56	-0.2	-1.04	-0.91	-0.18	-0.65	-1.04	0	-0.22	-0.23	-0.98	-1.07	-0.2	0.01	-0.1475	0.534219	0.976998	0.67427	1	0.997808	0.952944
Acap2	D4AFX6	-1.12	-0.29	-0.12	-0.27	-1.75	-0.09	-0.84	-0.44	-1.13	-1.55	-0.3	-0.68	0.62	-0.4	0.94	-0.12	-0.33	-0.465	0.71	0.418185	0.203393	0.0866882	1	0.996511	0.691619
Acap2	A0A338P6P6	1.04	0.96	0.53	0.33	1.2	0.79	1.1	0.52	0.28	0.07	0.6	1.15	0.14	0.66	0.4	0.8	0.1875	-0.19	-0.215	0.45034	0.527398	0.409539	1	0.996511	0.87457
Acap3	A2ADA6	-0.45	-0.33	0.01	0.13	-0.35	-0.35	-0.21	-0.17	-0.16	0.43	-0.12	-0.17	0.27	-0.35	-0.01	0.18	-0.11	0.155	0.1825	0.558414	0.508571	0.446278	1	0.996511	0.884817
Acat1	Q8QZT1	1.11	0.59	0.93	0.75	0.27	1.02	1.07	1.14	0.69	0.25	1.27	1.2	0.74	0.43	0.94	0.97	0.03	0.0075	-0.075	0.902775	0.978383	0.73286	1	0.998749	0.958635
Acat2	Q8CAY6	0.09	0.12	0.33	0.45	0.16	0	0.79	0.67	-0.03	0.33	0.58	0.34	-0.19	0.19	0.53	0.53	0.1575	0.0575	0.0175	0.499187	0.775297	0.940357	1	0.996511	0.990894
Acbd3	A0A0R4J079	-0.81	-0.71	-1.12	-0.96	-0.36	-1.02	-0.63	-0.94	-0.75	-0.6	-0.93	-0.52	-0.93	-0.63	-0.73	-1.09	0.1625	0.2	0.055	0.438376	0.300899	0.785355	1	0.996511	0.967642
Acbd5	A0A2I3BRB9	-0.21	0.4	0.4	0.29	0.1	0.25	1.01	0.27	1.02	0.14	0.69	0.32	1.47	0.59	1.11	0.79	0.1875	0.3225	0.77	0.477346	0.239877	0.0171709	1	0.996511	0.602211
Acbd6	Q9D061	-0.71	-0.33	0.1	-0.1	-0.49	-0.87	0.04	-0.06	-1.02	-0.2	-0.04	-0.66	-0.85	-0.31	-0.19	-0.18	-0.085	-0.22	-0.1225	0.758717	0.457562	0.643245	1	0.996511	0.943874
Ace	P09470	0.12	0.43	0.48	0.12	0.11	-0.31	0.59	-0.15	-1.01	-0.68	-0.08	0.12	-0.53	-0.69	0.65	0.47	-0.2275	-0.7	-0.3125	0.349125	0.0362704	0.38561	1	0.996511	0.861533
Ace2	Q8R0I0	-0.4	0.17	0.06	-0.23	0.04	-0.22	0.4	-0.39	0.66	-0.22	0.31	-0.01	1.34	0.23	0.05	0.38	0.0575	0.285	0.6	0.806029	0.279772	0.0897878	1	0.996511	0.69217
Ache	P21836	1.34	0.9	0.47	1.25	0.73	0.92	1.06	0.94	0.91	1.28	0.36	1.26	0.54	-0.32	1.17	0.85	-0.0775	-0.0375	-0.43	0.735606	0.899935	0.262646	1	0.996511	0.81524
Acin1	Q9JIX8-4	0.78	-0.23	-0.58	-0.59	-1.09	0.51	-0.91	0.05	0.46	-0.34	-0.57	-0.86	1.37	-0.52	-0.33	-1.15	-0.205	-0.1725	-0.0025	0.660844	0.674672	0.99654	1	0.996511	0.999143
Acly	Q91V92	0.16	-0.27	0.11	0.9	-0.21	-0.61	-0.87	-0.14	0.62	1.81	-0.62	-0.12	1.75	0.3	0.46	0.06	-0.6825	0.1975	0.4175	0.0449839	0.714288	0.343827	1	0.996511	0.848473
Acly	Q3V117	0.64	0.23	0.39	0.34	0.11	0.52	0.17	0.49	0.13	0.16	0.4	0.63	0.08	0.07	0.36	0.39	-0.0775	-0.07	-0.175	0.670605	0.723265	0.380336	1	0.996511	0.860984
Aco1	P28271	0.67	0.5	0.1	0.15	0.57	0.65	0.26	0.27	0.73	0.07	0.15	0.69	0.4	0.52	-0.06	-0.05	0.0825	0.055	-0.1525	0.684876	0.823633	0.533125	1	0.996511	0.911443
Aco2	Q99KI0	0.8	0.75	0.67	0.91	0.44	0.61	0.8	0.95	0.37	0.68	0.84	0.6	0.11	0.65	0.41	0.5	-0.0825	-0.16	-0.365	0.634854	0.380631	0.0893192	1	0.996511	0.69217
Acot1	O55137	0.24	-0.4	2.28	3.16	-0.36	0.25	2.68	3.63	-0.53	2.85	2.09	-0.21	-0.87	0.04	1.68	2.57	0.23	-0.27	-0.465	0.839816	0.799668	0.651006	1	0.996511	0.947407
Acot11	Q8VHQ9	-0.46	-0.36	-0.44	-0.37	-0.33	0.33	-0.49	-0.46	0.41	-0.5	-0.38	-0.32	1.32	-0.55	-0.26	-0.21	0.17	0.21	0.4825	0.444175	0.385747	0.254201	1	0.996511	0.809524
Acot13	Q9CQR4	0.68	1.07	0.53	1.4	0.38	0.44	0.5	1.79	1.07	0.84	1.17	0.24	0.87	1.03	0.13	-0.54	-0.1425	-0.09	-0.5475	0.703077	0.760002	0.191996	1	0.996511	0.777117
Acot2	Q9QYR9	0.09	0.55	0.37	0.47	0.56	0.27	0.85	0.56	0.15	0.04	0.48	-0.08	-0.29	0.39	0.1	0.25	0.19	-0.2225	-0.2575	0.33738	0.29164	0.271058	1	0.996511	0.822084
Acot7	Q91V12-2	-0.24	-0.23	-0.38	-0.79	-0.13	-0.04	-0.18	-1.02	0.35	-0.8	-0.37	0.15	0.24	0.03	-0.68	-0.85	0.0675	0.2425	0.095	0.801986	0.424351	0.757396	1	0.996511	0.962481
Acot8	P58137	-0.54	-0.22	-0.19	-0.11	0.25	-0.28	0.33	-0.25	-0.6	0	0.01	-0.39	-0.28	0.37	0.1	0.05	0.2775	0.02	0.325	0.215562	0.926456	0.159283	1	0.996755	0.754511
Acot9	Q9R0X4	0.72	0.39	1.06	1.12	0.48	1.17	0.8	1.38	-0.22	0.38	1.16	0.62	-0.5	0.06	0.56	0.63	0.135	-0.3375	-0.635	0.61657	0.32151	0.0727486	1	0.996511	0.668066
Acox1	Q9R0H0-2	-0.35	0.19	-0.03	-0.23	0.83	0.08	1.28	-0.05	0.43	0.35	0.46	0.46	0.26	0.92	0.52	0.36	0.64	0.53	0.62	0.0780292	0.0172992	0.0237171	1	0.996511	0.624734
Acox3	Q9EPL9	0.25	0.76	0.47	0.17	0.94	0.73	1.13	2.11	0.24	0.44	1.9	0.47	0.48	0.75	0.6	2.93	0.815	0.35	0.7775	0.0316223	0.379471	0.182777	1	0.996511	0.776002
Acp1	Q561M1	2.01	0.09	1.11	-0.39	0.87	2.23	2.59	1.82	-2.93	-1.97	1.2	1.56	-2.81	-2.37	2.08	1.69	1.1725	-1.24	-1.0575	0.075721	0.284584	0.407303	1	0.996511	0.874084
Acp1	Q9D358	0.44	0.03	0.65	1.54	-0.14	0.66	1.1	1.48	0.64	0.86	0.68	0.53	0.88	0.09	0.48	0.59	0.11	0.0125	-0.155	0.802887	0.969301	0.663616	1	0.996755	0.949825
Acp2	A0A5F8MPS7	-1.03	-0.55	-0.72	-0.84	-0.32	-0.61	-0.42	-1.13	-0.94	-0.54	-0.8	-0.62	-0.98	0.02	-1.33	-1.13	0.165	0.06	-0.07	0.474615	0.754321	0.82826	1	0.996511	0.973757
Acp6	Q8BP40	0.03	0.13	-0.08	0.4	0.05	-0.19	0.16	0.09	-0.11	0.5	0.02	-0.27	-0.44	0.51	-0.44	-0.77	-0.0925	-0.085	-0.405	0.601802	0.710498	0.207808	1	0.996511	0.785338
Acsbg1	Q99PU5	0.36	0.29	1.1	1.18	0.54	0.23	1.96	1.28	0.5	0.44	1.45	0.68	-0.31	0.43	0.75	1.15	0.27	0.035	-0.2275	0.530252	0.915417	0.552465	1	0.996755	0.91565
Acsf2	Q8VCW8	1.75	0.77	1.25	1.14	0.79	1.67	1.14	0.98	-0.09	0.51	1.29	1.4	0.11	-0.55	1.05	1.2	-0.0825	-0.45	-0.775	0.768506	0.265754	0.103001	1	0.996511	0.700625
Acsf3	Q3URE1	0.55	0.76	1.16	1.23	0.57	0.54	0.82	1.23	0.52	0.65	1.2	0.36	0.66	0.76	1.15	1.01	-0.135	-0.2425	-0.03	0.580838	0.367749	0.89948	1	0.996511	0.983509
Acsl1	D3Z041	0.1	0.24	0.58	0.45	0.4	-0.01	0.32	0.09	-0.38	0.07	0.43	-0.07	-0.39	-0.1	0.28	0.06	-0.1425	-0.33	-0.38	0.449822	0.177609	0.118125	1	0.996511	0.720612
Acsl3	Q9CZW4	0.55	0.71	0.59	0.54	0.88	0.5	1.62	0.81	1.08	0.81	0.73	0.75	0.69	0.87	0.85	0.96	0.355	0.245	0.245	0.183283	0.172517	0.180938	1	0.996511	0.775542
Acsl4	Q9QUJ7-2	-0.34	-0.72	-0.31	-0.43	-0.1	-0.18	0.13	-0.18	-1.76	-0.99	-0.32	-0.36	-1.28	-1.47	0.08	0.25	0.3675	-0.4075	-0.155	0.056633	0.256426	0.722091	1	0.996511	0.958398
Acsl5	Q8JZR0	-0.11	0.13	0.65	0.22	0.47	-0.1	-0.06	0.15	-0.68	-0.64	0.24	-0.09	-0.89	-0.25	0.25	0.53	-0.1075	-0.515	-0.3125	0.63677	0.0977154	0.380349	1	0.996511	0.860984
Acsl6	Q5ICG5	-0.8	-0.6	-0.41	-0.34	-1.17	0.19	-0.73	-1.37	0.48	0.49	-0.33	0.18	1.13	-0.8	0.23	-1.02	-0.2325	0.7425	0.4225	0.509907	0.0134422	0.385458	1	0.996511	0.861533
Acsl6	Q91WC3	-0.01	-0.06	0.24	0.35	0.14	0.19	0.75	0.18	-0.01	0.14	0.29	0	-0.29	0.05	0.03	0.36	0.185	-0.025	-0.0925	0.379875	0.891717	0.672473	1	0.996511	0.952944
Acss1	Q99NB1	0.67	0.8	0.39	0.74	0.68	0.89	1.18	0.54	0.45	-0.39	1	0.63	0.16	0.02	0.14	0.31	0.1725	-0.2275	-0.4925	0.397541	0.470873	0.0262898	1	0.996511	0.633075
Acss2	A2AQN4	-0.62	-0.49	-0.26	-0.37	-0.32	-0.75	-0.23	-0.39	-1.06	-0.69	-0.13	-0.46	-0.71	-0.81	-0.62	-0.54	0.0125	-0.15	-0.235	0.945122	0.534245	0.221207	1	0.996511	0.787447
Actb	P60710	0.97	0.51	0.54	0.69	0.72	0.85	0.72	1.09	0.42	0.28	0.73	0.92	-0.06	0.36	0.3	0.64	0.1675	-0.09	-0.3675	0.367048	0.680847	0.130087	1	0.996511	0.723659
Actbl2	Q8BFZ3	0.83	0.73	1.62	0.03	2.55	1.63	2.11	1.02	-1.77	-0.95	1.37	1.06	-1.36	-0.66	2.02	2.37	1.025	-0.875	-0.21	0.0396584	0.264172	0.813977	1	0.996511	0.972768
Actc1	P68033	-0.01	0.19	-0.11	0.31	0.26	-0.03	-0.01	0.24	0.57	1.21	0.19	-0.02	0.59	1	-0.83	-0.96	0.02	0.3925	-0.145	0.908028	0.204826	0.759964	1	0.996511	0.963123
Actg1	P63260	-0.11	0.39	0.02	0.21	0.64	-0.45	0.93	0.21	0.7	0.66	-0.12	-0.36	-0.47	1.07	0.25	0.55	0.205	0.0925	0.2225	0.518438	0.756733	0.518103	1	0.996511	0.90668
Actl6a	Q9Z2N8	-0.72	-1.74	-1.25	-0.93	-1.09	-1.17	-1.09	-0.89	-0.79	-0.91	-1.29	-1.1	-1.33	-0.16	-1.61	-1.19	0.1	0.1375	0.0875	0.683224	0.606514	0.81661	1	0.996511	0.972768
Actl6b	Q99MR0	0.03	-1.15	-1.46	-0.93	-1.13	-0.72	-1.25	-1.66	-0.66	-0.24	-1.57	-0.61	-0.46	-0.7	-1.26	-1.55	-0.3125	0.1075	-0.115	0.395	0.792387	0.770698	1	0.996511	0.965933
Actn1	A1BN54	1.93	0.83	1.14	1.03	1.01	1.64	1.01	1.12	0.38	0.36	1.11	1.19	0.12	0.74	0.62	0.79	-0.0375	-0.4725	-0.665	0.895527	0.175463	0.0500375	1	0.996511	0.658454
Actn1	Q7TPR4	9.06	1.26	5.22	0.72	2.45	8.65	8.61	4.93	0.46	0.84	5.66	6.65	0.55	-0.22	5.44	7.38	2.095	-0.6625	-0.7775	0.352868	0.768224	0.744064	1	0.996511	0.959371
Actn2	Q9JI91	1.6	0.98	1.74	1.8	0.93	1.03	2.1	1.9	0.96	0.69	1.48	1.29	0.9	0.7	1.69	1.47	-0.04	-0.425	-0.34	0.906406	0.144634	0.288793	1	0.996511	0.824705
Actn4	A0A1L1SV25	1.06	0.77	0.86	0.91	1.25	1.07	0.73	0.93	0.47	0.83	1.04	0.98	0.2	1.02	0.48	0.55	0.095	-0.07	-0.3375	0.589648	0.720212	0.162564	1	0.996511	0.757516
Actn4	A0A1L1SVJ6	2.49	2.49	0.48	1.63	2.35	1.87	0.1	1.26	1.81	-0.36	1	2.55	2.27	-3.11	1.07	0.29	-0.3775	-0.5225	-1.6425	0.546541	0.470284	0.165666	1	0.996511	0.758837
Actn4	E9Q2W9	0.4	0.62	0.78	0.81	1.22	0.47	0.87	1.1	0.75	0.63	1.19	0.34	0.58	0.91	0.29	0.72	0.2625	0.075	-0.0275	0.243452	0.746483	0.898268	1	0.996511	0.983509
Actr10	Q9QZB7	0.02	0.1	0.66	0.46	0.23	-0.03	0.54	0.58	-0.08	0.16	0.61	0.14	-0.65	0.17	0.46	0.62	0.02	-0.1025	-0.16	0.930099	0.667806	0.624884	1	0.996511	0.939167
Actr1a	P61164	0.15	0.11	0.38	0.45	0.01	0.27	0.1	0.53	0.78	1.26	0.5	0.41	0.48	0.85	0.3	0.18	-0.045	0.465	0.18	0.807108	0.0771683	0.421786	1	0.996511	0.875736
Actr1b	Q8R5C5	0.7	0.01	0.04	0.49	0.23	0.53	0.35	0.48	0.33	0.44	0.16	0.77	-0.09	0.02	-0.13	0.17	0.0875	0.115	-0.3175	0.679327	0.634737	0.188362	1	0.996511	0.776843
Actr2	P61161	1.01	0.46	0.35	0.48	0.74	1.03	0.64	0.7	0.11	0.26	0.56	0.75	-0.43	0.4	0	0.23	0.2025	-0.155	-0.525	0.332419	0.516551	0.0706973	1	0.996511	0.668066
Actr3	Q99JY9	1.32	0.48	0.37	1.05	0.64	1.22	0.6	1.3	0.22	-0.49	0.71	1.09	-0.42	0.01	0.26	0.25	0.135	-0.4225	-0.78	0.646863	0.298812	0.024485	1	0.996511	0.628313
Actr3b	Q641P0	0.32	-0.39	0.16	0.41	-0.01	0.27	0.18	0.5	-0.09	-0.14	0.28	-0.33	-0.72	-0.36	-0.53	-0.31	0.11	-0.195	-0.605	0.632095	0.435224	0.0310275	1	0.996511	0.641481
Actr6	A0A0R4J009	-2.01	-1.75	-2.37	-1.53	-2.75	-3.05	-3.22	-0.81	-3.13	-1.37	-2.89	-2.29	-2.71	-4.33	-1.89	-1.46	-0.5425	-0.505	-0.6825	0.327951	0.239805	0.275602	1	0.996511	0.822084
Acvr1	P37172	-0.28	-0.12	-1.84	-0.94	-0.15	0.51	-1.33	-1.2	-0.43	-0.29	-0.93	0.15	-0.59	-0.06	-0.89	-0.5	0.2525	0.42	0.285	0.641748	0.338224	0.492821	1	0.996511	0.897531
Acvr1b	Q61271	0.62	0.36	0.46	0.85	0.96	0.94	1.12	1.11	-0.28	1.8	0.55	0.4	-0.09	0.52	0.61	1.16	0.46	0.045	-0.0225	0.0230078	0.915281	0.93873	1	0.996755	0.989956
Acvr1c	Q8K348	0.59	0.96	-0.59	1.01	0.91	0	-0.15	0.61	0.46	0.19	-0.07	-0.32	-0.41	0.91	0.04	0.79	-0.15	-0.4275	-0.16	0.722436	0.292573	0.728184	1	0.996511	0.958635
Acvr2a	P27038	0.07	0.18	0.84	1.12	0.08	0.42	1.21	0.94	-0.55	2.12	0.79	0.35	-0.5	-0.84	0.61	0.99	0.11	0.125	-0.4875	0.751293	0.824333	0.319142	1	0.996511	0.838969
Acy1	A0A0R4J050	-0.03	-0.12	0.07	-0.11	-0.21	-0.5	0.01	-0.23	-0.29	0.2	-0.45	-0.29	-0.11	-0.3	-0.28	-0.5	-0.185	-0.16	-0.25	0.287938	0.428822	0.190675	1	0.996511	0.776865
Acy3	Q91XE4	0.67	0.34	-1.08	-1.38	0.55	0.18	-0.99	-1.3	-0.13	-0.21	-1.14	0.13	-0.42	0.36	-1.67	-0.97	-0.0275	0.025	-0.3125	0.964406	0.962744	0.61077	1	0.996755	0.935047
Acyp1	P56376	-0.76	-0.42	-0.14	-0.34	-0.53	-0.61	-0.58	-0.96	-0.8	-2.38	-0.46	-0.71	-0.76	-0.7	-0.88	-0.58	-0.255	-0.6725	-0.315	0.217382	0.145244	0.151275	1	0.996511	0.749304
Acyp2	P56375	0.21	-0.16	-0.18	-0.62	-0.73	0.19	-0.65	-0.09	0.84	-1.03	0.11	-0.03	0.72	-0.87	-0.69	-0.86	-0.1325	0.16	-0.2375	0.640176	0.691624	0.560414	1	0.996511	0.919045
Ada	P03958	0.59	0.56	-1.74	-1.79	0.47	0.35	-1.1	-1.69	-0.4	-0.57	-1.27	0.45	0.07	0.13	-1.22	-1.54	0.1025	0.1475	-0.045	0.895123	0.83161	0.950538	1	0.996511	0.992476
Adal	Q80SY6	-0.28	0.26	-0.56	-0.61	0.33	-0.21	-1.2	-0.32	0.1	-0.37	-0.55	0.02	-0.23	0.08	-0.33	-1.16	-0.0525	0.0975	-0.1125	0.883574	0.717763	0.736723	1	0.996511	0.958635
Adam10	O35598	-0.16	0.09	-0.14	-0.22	0.14	0.16	0.15	-0.54	0.27	-0.02	-0.19	0.24	0.4	0.01	0.19	0.09	0.085	0.1825	0.28	0.690181	0.345023	0.161958	1	0.996511	0.757516
Adam11	Q7TQG7	0.34	-0.32	-0.8	-0.54	0.05	0.85	-0.48	-0.85	0.46	-0.78	-0.79	0.4	0.18	-0.06	-1.1	-0.77	0.2225	0.1525	-0.1075	0.594926	0.709135	0.775632	1	0.996511	0.966799
Adam15	O88839-2	0.31	0.3	0.19	0.91	0.24	0.67	1.15	0.66	0.62	1.34	0.87	0.6	1.74	1.09	1.17	0.67	0.2525	0.43	0.74	0.339918	0.122253	0.0294503	1	0.996511	0.637553
Adam17	Q9Z0F8	-0.16	0.36	-0.02	-0.12	0.14	0.29	-1.31	-0.45	-0.19	0.19	-0.4	0.17	0.65	0.04	-0.34	-0.15	-0.3475	-0.0725	0.035	0.353709	0.745031	0.896743	1	0.996511	0.983509
Adam22	Q9R1V6-14	0.26	0.34	0.42	0.16	0.63	0.49	0.18	0.18	-0.14	0.12	0.13	0.28	0.09	0.26	0.47	0.32	0.075	-0.1975	-0.01	0.66982	0.277231	0.95637	1	0.996511	0.992636
Adam23	Q9R1V7-2	0.86	0.69	0.76	0.73	0.45	0.82	0.68	0.36	0.95	0.21	0.28	0.7	0.98	-0.12	0.21	0.17	-0.1825	-0.225	-0.45	0.291184	0.316857	0.116412	1	0.996511	0.718608
Adam9	Q61072	-0.02	0.23	-0.28	0.01	0.4	0.25	-0.02	0.02	0.46	0.68	-0.01	0.45	0.21	0.11	-0.08	-0.22	0.1775	0.41	0.02	0.351537	0.086766	0.922103	1	0.996511	0.987447
Adap1	E9PY16	0.48	-0.04	0.79	1.09	0.37	0.47	1.19	1.29	-0.49	0.02	1.11	0.61	-1.04	-0.25	0.62	0.65	0.25	-0.2675	-0.585	0.456063	0.513554	0.21094	1	0.996511	0.786269
Adar	Q99MU3-5	0.2	-1.34	-0.89	-1.11	-0.52	-0.13	-0.41	-0.53	-1.25	-0.92	-0.44	-0.58	-0.94	-0.73	0.2	-0.25	0.3875	-0.0125	0.355	0.274535	0.973276	0.395614	1	0.997515	0.866946
Adarb1	Q91ZS8-4	0.23	-0.77	-0.99	-0.59	-0.56	-0.2	-0.23	-0.46	-0.97	-0.68	-0.84	-1.16	-0.8	-0.69	-0.63	-0.49	0.1675	-0.3825	-0.1225	0.557334	0.21407	0.674606	1	0.996511	0.952944
Adat2	Q6P6J0	-0.44	-0.47	0.33	0.41	-0.23	-0.05	-0.16	0.43	0	0.36	0.07	-0.1	-0.57	0.34	-0.67	-0.49	0.04	0.125	-0.305	0.887712	0.648891	0.374106	1	0.996511	0.859424
Adat3	Q6PAT0	6.99	3.15	5.06	3.45	4.27	6.17	5.95	8.93	1.83	2.65	6.22	6.41	3.49	-0.04	7.06	7.71	1.6675	-0.385	-0.1075	0.178966	0.77151	0.951509	1	0.996511	0.992476
Adck1	Q9D0L4	0.01	-0.43	0.26	-0.53	-0.08	0.33	0.74	0.05	-0.54	-0.79	0.74	0.03	-0.7	-0.54	0.34	0.61	0.4325	0.0325	0.1	0.131926	0.930777	0.784796	1	0.996755	0.967642
Adck2	E9QL72	-1.14	-1.29	-1.08	-1.35	-1.01	-1.34	-2.29	-2.59	-1.05	0.36	-1.85	-1.21	-1.16	-0.05	-1.59	-2.57	-0.5925	0.2775	-0.1275	0.131409	0.535645	0.795476	1	0.996511	0.969727
Adck5	E9PUK2	-0.02	1.61	-0.23	0.2	0.21	-0.76	-0.39	-0.02	1	0.19	0.03	-0.02	-0.68	0.4	0.15	-0.22	-0.63	-0.09	-0.4775	0.173996	0.841704	0.306025	1	0.996511	0.832533
Adcy1	O88444	-0.16	0.02	0.29	0.13	0.53	0.18	0.46	-0.14	0.07	-0.2	0.23	0.01	0.11	0.34	-0.1	0.11	0.1875	-0.0425	0.045	0.379584	0.82158	0.820926	1	0.996511	0.972768
Adcy2	Q3V1Q3	-0.11	0.18	0.61	0.18	0.54	0.21	0.58	0.46	0.14	0.27	0.68	0.18	-0.01	0.27	0.16	0.43	0.2325	0.1025	-0.0025	0.268229	0.653288	0.991067	1	0.996511	0.996154
Adcy3	B8JK56	0.36	0.7	0.62	0.37	0.63	0.86	0.97	0.45	0.73	0.37	0.76	0.37	0.37	0.28	0.51	0.56	0.215	0.045	-0.0825	0.266932	0.816056	0.662232	1	0.996511	0.949645
Adcy5	P84309	2.38	0.58	1.75	2.26	0.28	1	2.32	1.93	1.03	1.44	1.1	2.05	0.65	0.38	2.69	2.06	-0.36	-0.3375	-0.2975	0.528513	0.455748	0.63897	1	0.996511	0.942804
Adcy6	A0A2I3BRC5	0.69	1.03	1.16	1.54	1.12	0.55	1.69	1.4	0.53	0.39	1.61	0.93	0.34	1.75	0.8	1.45	0.085	-0.24	-0.02	0.775808	0.466413	0.955457	1	0.996511	0.992482
Adcy8	A0A2I3BQ46	1.28	1.04	1.14	0.75	1.16	1.43	1.49	1.22	0.82	0.63	1.36	1.31	0.51	0.89	0.97	1.88	0.2725	-0.0225	0.01	0.159486	0.925282	0.974911	1	0.996755	0.992977
Adcy9	P51830	1.22	1.19	1.68	1.11	1.02	1.04	1.42	1.2	0.87	0.79	1.22	0.93	0.77	0.43	1.12	1.18	-0.13	-0.3475	-0.425	0.509579	0.117905	0.116306	1	0.996511	0.718608
Adcyap1	O70176	1.4	2.08	-0.1	0.7	2.1	2.32	1.39	0.44	1.19	2.48	1.4	2.58	0.87	2.81	1.04	1.5	0.5425	0.8925	0.535	0.359525	0.128673	0.375072	1	0.996511	0.859611
Adcyap1r1	E9Q968	0.13	0.45	0.38	0.11	0.11	0.21	0.46	0.53	0.34	0.32	0.05	0.29	0.33	0.05	0.06	0.06	0.06	-0.0175	-0.1425	0.737256	0.921638	0.458229	1	0.996755	0.887902
Adcyap1r1	E9Q3E8	-0.12	2.3	-0.41	0.02	-0.16	0.28	0.12	0.08	-0.3	-0.25	-0.58	-0.13	0.23	0.26	0.39	0.31	-0.3675	-0.7625	-0.15	0.528567	0.211273	0.794289	1	0.996511	0.969367
Add1	E9Q1K3	1	0.4	0.83	0.6	1.7	0.02	0.75	0.69	0.11	1.77	-0.04	0.08	0.74	1.22	1.58	1.1	0.0825	-0.2275	0.4525	0.81615	0.596981	0.0984159	1	0.996511	0.698156
Add1	F8WGR0	0.78	0.12	0.68	1.02	-0.17	0.56	0.48	1.03	0.56	1.16	0.74	0.34	0.48	-0.07	0.27	0.34	-0.175	0.05	-0.395	0.572983	0.85446	0.147274	1	0.996511	0.746406
Add1	Q9QYC0	-0.86	-0.26	-1.29	-2.21	-1.2	-0.86	-1.95	-2.33	-1.44	-1.8	-0.77	-0.77	-1.01	-0.96	-1.74	-1.18	-0.43	-0.04	-0.0675	0.391516	0.929787	0.874214	1	0.996755	0.979626
Add2	Q9QYB8	1.07	0.69	1.07	0.74	0.68	0.94	0.97	0.98	0.6	0.34	1.14	0.5	0.39	0.93	0.72	0.83	-5.88785e-17	-0.2475	-0.175	1	0.303511	0.419448	1	0.996511	0.87558
Add3	Q9QYB5-2	0.27	0.24	0.56	0.52	0.23	0.33	0.55	0.56	0.28	0.2	0.66	0.15	0.43	-0.31	0.33	0.25	0.02	-0.075	-0.2225	0.906135	0.701944	0.346546	1	0.996511	0.851096
Add3	Q9QYB5	-1.22	-1.18	0.33	-0.06	-0.83	-1.23	-1.23	0.49	-0.68	0.57	0.71	-1.53	-0.98	-0.86	-1.03	-0.79	-0.1675	0.3	-0.3825	0.748478	0.623684	0.335532	1	0.996511	0.847442
Adgb	D3YZ77	-1.12	-1.03	-0.8	-0.4	-1.41	-0.76	-0.48	0.02	0.61	0.02	0.04	-1.69	-1.72	-0.9	-0.58	-0.01	0.18	0.5825	0.035	0.587858	0.251875	0.926746	1	0.996511	0.989128
Adgra1	Q8C4G9	-0.12	0.65	0.31	0.79	1.16	0.38	0.25	0.76	0.95	1.44	0.74	0.35	0.76	0.95	0.53	0.77	0.23	0.4625	0.345	0.434582	0.159056	0.19534	1	0.996511	0.78004
Adgra2	J3QMG7	-2.28	-0.3	-1.02	-1.03	0.25	-2.61	-3.17	0.87	3.67	5.63	-1.49	-2.22	4.57	2.79	-1.61	-3.05	-0.0075	2.555	1.8325	0.993882	0.171009	0.280049	1	0.996511	0.822084
Adgrb1	Q3UHD1	1.15	1.02	1.4	1.15	1.13	1.17	1.04	1.17	1.37	0.94	1.36	1.27	1.58	1.27	0.73	1.06	-0.0525	0.055	-0.02	0.734498	0.769757	0.932538	1	0.996511	0.989713
Adgrb2	H7BX74	0.63	0.84	0.56	0.56	2.41	0.82	0.47	0.54	1.34	0.65	0.85	0.76	1.6	1.16	0.62	0.65	0.4125	0.2525	0.36	0.351812	0.247869	0.201858	1	0.996511	0.781867
Adgrb3	Q80ZF8	1.23	1.08	1	0.97	0.94	1.23	0.69	0.85	0.54	0.78	1.11	1.27	0.66	0.38	0.93	0.81	-0.1425	-0.145	-0.375	0.426319	0.50451	0.0873448	1	0.996511	0.691619
Adgre1	Q61549	0.33	-0.54	-3.92	-4	-0.07	0.03	-5.76	-5.34	0.07	-3	-3.42	0.43	0.88	-1.95	-4.33	-5.22	-0.7525	0.5525	-0.6225	0.667734	0.683644	0.693136	1	0.996511	0.955729
Adgrf5	G5E8Q8	-0.1	0.38	-1.38	-2.11	0.81	-0.28	-1.11	-2.12	-0.44	-1.19	-0.89	-0.05	-0.47	-0.57	-1.61	-1.6	0.1275	0.16	-0.26	0.867314	0.780986	0.665524	1	0.996511	0.949825
Adgrg1	Q8K209	1.14	1.57	0.8	0.76	1.61	1.18	0.92	0.64	1.28	0.47	0.2	0.98	0.97	1.45	0.6	1.07	0.02	-0.335	-0.045	0.943307	0.29752	0.871351	1	0.996511	0.979293
Adgrl1	H7BX15	2.27	1.72	2.07	1.95	-0.36	2.67	-0.58	0.83	2.24	0.45	1.54	1.94	3.04	-4.65	1.34	1.13	-1.3625	-0.46	-1.7875	0.0729081	0.259124	0.250768	1	0.996511	0.807201
Adgrl1	E9Q3V9	0.27	0.53	0.31	0.57	0.54	0.36	0.42	0.52	0.5	0.36	0.51	0.66	0.2	0.6	0.25	0.07	0.04	0.0875	-0.14	0.796796	0.614414	0.49366	1	0.996511	0.89758
Adgrl2	A0A0G2JFV3	1.3	1.13	0.97	0.97	1.45	1.43	1.26	1.1	1.08	0.68	1.17	1.49	0.91	1.15	0.82	0.91	0.2175	0.0125	-0.145	0.217931	0.954877	0.446174	1	0.996755	0.884817
Adgrl3	D3YTW7	0.99	0.83	0.8	1	0.68	1.08	0.87	1.11	1.2	0.75	1.11	1.29	1.1	0.78	0.61	0.68	0.03	0.1825	-0.1125	0.858194	0.345443	0.564973	1	0.996511	0.920315
Adgrl3	D3Z6H9	0.07	0.33	-1.32	-1.8	0.09	0.74	-0.94	-0.55	0.67	-2.34	-0.15	0.06	1.87	-0.25	-1.64	-1.56	0.515	0.24	0.285	0.387694	0.75234	0.744318	1	0.996511	0.959371
Adh5	P28474	0.68	-0.82	-0.8	-0.81	-0.57	0.54	-1.04	-1	0.51	-0.39	-1.02	0.44	0.02	0.38	-1.03	-0.85	-0.08	0.3225	0.0675	0.868798	0.5124	0.886456	1	0.996511	0.979767
Adhfe1	A0A087WRE7	0.08	0.4	1.29	0.98	0.3	0.23	1.01	0.8	-0.22	0.69	1.16	0.52	0.27	-0.51	0.61	1	-0.1025	-0.15	-0.345	0.753012	0.695566	0.405119	1	0.996511	0.87246
Adi1	Q99JT9	0.83	0.73	0.51	0.27	0.44	-0.07	-0.19	0	0.25	0.27	-0.31	0.4	-0.2	0.95	-0.23	-0.47	-0.54	-0.4325	-0.5725	0.0299154	0.089884	0.121025	1	0.996511	0.721448
Adipoq	Q60994	-2.26	-2.65	-3.05	-3.05	-0.32	-2.48	-0.98	-2.28	-2.37	-1.03	-3.31	-1.83	-2.06	-2.5	-1.99	-3.09	1.2375	0.6175	0.3425	0.0360187	0.220886	0.303432	1	0.996511	0.831662
Adipor1	Q91VH1	-0.11	0.56	0.66	0.77	0.91	0.18	1.45	0.65	0.18	1.12	0.91	0.32	0.02	-0.03	0.44	0.89	0.3275	0.1625	-0.14	0.325138	0.597589	0.646615	1	0.996511	0.945037
Adk	P55264-2	-1.61	-2.53	-1.22	-1.43	-2.65	-1.1	-0.95	-1.34	-2.38	-1.3	-1.26	-1.99	-1.56	-2.73	-1.64	-1.42	0.1875	-0.035	-0.14	0.678598	0.927087	0.728204	1	0.996755	0.958635
Adnp	Q9Z103	0.67	-0.66	0.88	0.26	-0.69	0.22	1.01	0.43	-0.04	0.13	0.88	-0.04	-0.04	0.11	1.81	1.78	-0.045	-0.055	0.6275	0.92137	0.887637	0.283522	1	0.996511	0.822669
Ado	Q6PDY2	-0.22	0.26	0.42	0.08	0.15	-0.19	-0.17	0.09	0.21	0.82	0.18	0.05	0.08	0.44	0.17	-0.03	-0.165	0.18	0.03	0.412601	0.469943	0.891777	1	0.996511	0.982213
Adora1	Q60612	0.85	1.05	0.46	0.36	-0.6	1.97	-0.97	-1	3.16	-2.56	0.02	0.24	3.63	-3.73	-0.4	-0.28	-0.83	-0.465	-0.875	0.232074	0.662364	0.520712	1	0.996511	0.907667
Adora2a	Q60613	1.19	-0.1	2.02	1.31	-1.18	-0.26	0.48	1.43	1.93	1.5	0.27	1.03	2.57	0.14	1.88	1.4	-0.9875	0.0775	0.3925	0.151439	0.88254	0.530302	1	0.996511	0.908663
Adpgk	Q3UDS7	-0.17	0.05	-0.88	-0.4	0.53	-0.07	-0.17	-0.73	-0.14	0.15	-0.46	-0.12	-0.04	0.3	0.01	0.09	0.24	0.2075	0.44	0.459373	0.426458	0.102978	1	0.996511	0.700625
Adprh	P54923	-0.64	-0.64	-1.24	-1.13	-0.54	-0.61	-0.86	-1.06	-0.97	-0.53	-1.18	-0.51	-1	-0.53	-1	-1.16	0.145	0.115	-0.01	0.518046	0.650142	0.967454	1	0.996511	0.9927
Adprm	Q99KS6-2	-2.07	-1.69	-2.57	-1.47	-1.36	-1.88	-2.35	-2.07	-1.51	-2.05	-1.13	-1.65	-1.55	-1.8	-2.5	-1.53	0.035	0.365	0.105	0.910951	0.258186	0.753232	1	0.996511	0.961479
Adprs	Q8CG72	-1.14	-0.93	-0.93	-0.53	-1.35	-0.99	-0.96	-0.97	-0.41	-1.1	-1.02	-1.13	-0.34	-0.87	-1.34	-1.17	-0.185	-0.0325	-0.0475	0.354679	0.892224	0.863284	1	0.996511	0.977235
Adra1a	P97718	0.88	0.88	0.89	0.91	0.59	0.3	-0.31	0.44	1.89	0.93	0.57	0.94	1.46	1.27	0.75	0.13	-0.635	0.1925	0.0125	0.0175151	0.514004	0.96763	1	0.996511	0.9927
Adra1b	P97717	-0.64	0.18	-0.26	-0.14	1.08	-0.24	0.11	-0.37	0.13	-0.37	0.28	0.37	0.78	1.29	0.13	-0.53	0.36	0.3175	0.6325	0.32415	0.237361	0.150975	1	0.996511	0.749304
Adra2a	Q01338	-0.23	0.73	1.14	1.49	-0.54	0.49	0.51	1.14	1.29	3.03	1.1	0.15	1.88	0.66	1.55	0.75	-0.3825	0.61	0.4275	0.426512	0.35662	0.356005	1	0.996511	0.8553
Adra2c	Q01337	-0.18	-0.12	1.83	1.24	-2	-0.85	0.93	1.2	0.99	2.66	0.4	0.68	2.79	1.22	0.33	2.3	-0.8725	0.49	0.9675	0.303071	0.458868	0.177726	1	0.996511	0.772068
Adrbk2	Q3UYH7	0.17	-0.25	0.25	0.17	-0.22	0.24	0.7	0.34	-0.06	-0.3	0.38	-0.24	0.29	-0.39	0.11	-0.12	0.18	-0.14	-0.1125	0.455859	0.539038	0.627212	1	0.996511	0.939737
Adrm1	Q9JKV1	-1.62	-1.31	0.76	0.56	-1.36	-1.13	0.28	0.78	-0.1	0.21	0.92	-1.54	0.01	-0.75	0.9	0.55	0.045	0.275	0.58	0.951001	0.707749	0.384296	1	0.996511	0.860984
Adsl	P54822	0.02	0.04	0.48	0.6	-0.22	-0.28	0.66	0.68	-0.08	0.15	0.21	-0.01	-0.53	0.26	0.04	0.14	-0.075	-0.2175	-0.3075	0.804101	0.311522	0.254964	1	0.996511	0.809524
Adss1	P28650	-1.93	-2.26	-2.69	-3.21	-2.27	-2.66	-2.72	-2.82	-2.01	-1.47	-2.46	-1.97	-1.21	-2.89	-1.09	-3.38	-0.095	0.545	0.38	0.751837	0.134723	0.525492	1	0.996511	0.908107
Adss2	P46664	-0.11	-0.35	-0.02	0.26	0.17	0.12	0.29	0.03	-0.68	-0.15	0.01	-0.35	-0.86	0.27	-0.22	0.12	0.2075	-0.2375	-0.1175	0.27094	0.313119	0.692102	1	0.996511	0.955729
Afap1	Q80YS6	-0.38	-0.07	0.66	0.53	-0.56	-0.07	0.01	0.12	0.73	1.48	0.94	0.18	0.67	-0.61	0.23	-0.29	-0.31	0.6475	-0.185	0.300072	0.0968314	0.617467	1	0.996511	0.937152
Afap1l1	Q8BZI0	0.31	0.19	-0.11	-0.39	-0.05	-0.17	-0.61	-0.55	1.05	-0.35	-0.3	0.34	1.26	-0.28	-0.87	0.88	-0.345	0.185	0.2475	0.158109	0.605543	0.613578	1	0.996511	0.935813
Afap1l2	Q5DTU0	-0.06	1.17	0.37	0.43	1.43	0.61	0.16	0.09	0.13	0.45	0.37	-0.22	-0.02	1.51	-0.05	0.3	0.095	-0.295	-0.0425	0.802747	0.341934	0.920498	1	0.996511	0.98706
Afdn	Q9QZQ1	0.71	0.7	0.3	0.17	0.76	0.72	0.26	0.23	0.86	0.12	0.6	1.1	0.96	0.56	0.33	0.35	0.0225	0.2	0.08	0.919154	0.462418	0.739588	1	0.996511	0.958796
Afdn	E9PYX7	-0.26	0.43	-0.21	-0.53	0.26	0.11	-0.44	-0.24	-0.09	-0.24	0.5	0.12	-0.54	0.49	-0.22	-0.25	0.065	0.215	0.0125	0.806948	0.44011	0.967682	1	0.996511	0.9927
Aff4	Q9ESC8	-1.36	-2.36	-1.15	-0.92	-1.95	-1.39	-1.45	-1.5	-0.65	0.05	-1.28	-2.45	-0.25	-0.01	0.8	-0.61	-0.125	0.365	1.43	0.707468	0.526036	0.00734219	1	0.996511	0.552614
Afg1l	Q3V384	0.44	0.4	0.69	0.33	0.1	0.49	1.32	0.87	-0.32	-0.42	0.87	0.53	-0.65	-0.15	0.34	1.24	0.23	-0.3	-0.27	0.415086	0.369102	0.501416	1	0.996511	0.901002
Afg3l1	Q920A7	0.15	0.14	0.27	0.14	0.53	0.11	0.51	0.25	1.83	0.63	1.11	0.89	2.32	1.05	0.92	0.3	0.175	0.94	0.9725	0.304229	0.00736264	0.0386645	1	0.996511	0.658454
Afg3l2	Q8JZQ2	0.28	0.47	0.76	0.95	-0.05	0.58	0.48	0.88	0.27	0.87	0.93	0.26	0.29	0.2	0.42	0.43	-0.1425	-0.0325	-0.28	0.579545	0.899326	0.213075	1	0.996511	0.786931
Afm	O89020	-3.04	-3.24	-2.53	-2.99	-2.53	-3.15	-3.07	-2.76	-3.71	-1.49	-2.87	-2.83	-3.38	-2.31	-3.73	-3.54	0.0725	0.225	-0.29	0.750718	0.622326	0.416106	1	0.996511	0.874945
Aftph	Q80WT5-2	-0.58	-0.56	-0.17	-0.28	-0.68	-0.59	-0.4	-0.32	-0.59	-0.47	-0.27	-0.38	-0.5	-0.09	-0.23	-0.34	-0.1	-0.03	0.1075	0.578018	0.870842	0.594784	1	0.996511	0.929843
Aga	Q64191	-0.29	-0.7	-0.47	-0.5	-0.72	-0.92	0.14	-0.78	-0.63	-0.45	-0.48	0.25	-0.21	-1.08	-0.75	-0.22	-0.08	0.1625	-0.075	0.761089	0.505515	0.772143	1	0.996511	0.965933
Agap1	A0A087WRF2	1.02	0.86	0.11	0.25	0.74	0.93	0.35	0.42	1.61	1.04	0.23	1.23	1.06	1.67	0.95	0.12	0.05	0.4675	0.39	0.852135	0.214045	0.318955	1	0.996511	0.838969
Agap1	A0A1D5RLD2	1.37	0.48	0.56	0.65	-0.04	1.06	0.12	0.6	1.64	1.45	0.84	0.88	2.52	1.16	1.76	-0.14	-0.33	0.4375	0.56	0.311879	0.163432	0.324973	1	0.996511	0.842881
Agap1	E9Q3K3	0.43	0.35	0.35	0.73	0.16	0.29	0.21	0.39	0.88	0.62	0.47	0.31	0.57	0.55	0.21	0.25	-0.2025	0.105	-0.07	0.234596	0.603084	0.72611	1	0.996511	0.958398
Agap2	Q3UHD9	0.4	-0.1	0.28	0.53	0.03	0.56	0.29	0.64	0.95	0.28	0.58	0.24	1.26	0.12	0.68	-0.07	0.1025	0.235	0.22	0.640697	0.342192	0.512878	1	0.996511	0.904133
Agap3	Q8VHH5	0.91	0.64	0.97	1.23	0.53	1.06	0.82	1.49	1.01	1.22	1.14	1.2	0.71	0.93	0.61	0.5	0.0375	0.205	-0.25	0.880174	0.293417	0.253316	1	0.996511	0.809524
Agap3	A0A1D5RMG4	0.05	-0.38	-1.1	-0.64	-1.01	0.44	-0.17	-0.77	0.11	-1.04	-1	-0.05	0.31	0	-1.32	-0.96	0.14	0.0225	0.025	0.715808	0.952163	0.953883	1	0.996755	0.992476
Agbl4	E4W7Y4	-0.19	0.21	0.33	-0.1	0.51	0.24	0.6	0.88	-0.74	-0.83	0.46	0.05	-0.31	0.03	0.22	0.38	0.495	-0.3275	0.0175	0.0398792	0.339119	0.940556	1	0.996511	0.990894
Agfg1	A0A087WNV1	0.32	-0.28	0.06	0.26	-0.03	0.22	-0.16	0.16	0.78	-0.12	0.04	-0.14	0.72	0.62	-0.21	-0.47	-0.0425	0.05	0.075	0.828517	0.853646	0.82022	1	0.996511	0.972768
Agfg2	Q3U2K8	0.36	-0.18	-0.23	-0.11	-0.44	-0.07	-0.28	-0.35	-0.07	-0.39	-0.16	-0.03	-0.25	0.14	-0.47	-0.62	-0.245	-0.1225	-0.26	0.226781	0.552911	0.310465	1	0.996511	0.834523
Agk	Q9ESW4	0.57	0.38	-0.3	-0.12	0.22	0.53	-0.13	-0.34	0.63	-0.64	-0.1	0.59	0.4	1.04	-0.93	-0.51	-0.0625	-0.0125	-0.1325	0.82523	0.97207	0.77399	1	0.997515	0.966062
Agl	F8VPN4	0.28	-0.06	0.1	0.16	0.73	0.56	0.5	0.3	-0.16	-0.44	0.15	0.05	-0.52	0.07	-0.13	0.27	0.4025	-0.22	-0.1975	0.038028	0.285703	0.397548	1	0.996511	0.867334
Ago1	A0A6I8MX18	-0.37	-0.72	0.04	0.48	-0.53	-0.71	-0.29	-0.05	-0.48	-0.07	-0.01	-0.23	-1.01	-0.78	-0.1	-0.19	-0.2525	-0.055	-0.3775	0.402692	0.849035	0.286053	1	0.996511	0.823465
Ago2	Q8CJG0	-0.56	-0.88	-1.18	-0.94	-0.77	-0.49	-0.63	-1.05	-0.27	-0.8	-1.17	-0.5	0.1	-0.36	-0.91	-0.78	0.155	0.205	0.4025	0.457705	0.429132	0.177236	1	0.996511	0.772068
Ago3	Q8CJF9	-1.69	-1.51	-0.58	-0.55	-1.36	-1.25	-0.2	-0.24	-1.03	0.31	-0.24	-1.38	-0.33	-0.52	-0.16	0.55	0.32	0.4975	0.9675	0.442518	0.292886	0.0273385	1	0.996511	0.635993
Agpat1	A0A0R4J263	2.02	1.11	1.36	0.27	1.72	1.63	2.16	1.58	0.17	0.91	1.35	1.8	0.03	0.51	1.75	2.55	0.5825	-0.1325	0.02	0.139988	0.778021	0.974281	1	0.996511	0.992977
Agpat3	Q9D517	0.39	-0.04	-0.19	-0.23	0.29	0.18	0.48	-0.42	0.38	-0.12	-0.3	0.48	0.48	0.4	-0.06	0.06	0.15	0.1275	0.2375	0.555722	0.622342	0.325823	1	0.996511	0.843144
Agpat4	Q8K4X7	0.12	0.09	0.08	0.2	0.46	0.19	0.42	0.14	0.13	0.23	0.19	0.35	0.51	0.39	0.79	0.86	0.18	0.1025	0.515	0.262282	0.51828	0.023259	1	0.996511	0.623925
Agpat5	Q9D1E8	1.74	1.08	1.42	0.51	1.28	1.87	1.62	0.78	1.77	0.77	1.34	1.79	1.6	1.36	1.54	1.7	0.2	0.23	0.3625	0.561608	0.51499	0.231237	1	0.996511	0.788863
Agps	A2AL50	-0.14	0.29	0.11	0.81	0.73	0.45	0.64	0.28	0.3	0.76	0.16	0.28	0.25	0.75	0.32	0.65	0.2575	0.1075	0.225	0.300333	0.680549	0.402488	1	0.996511	0.870698
Agrn	M0QWP1	-0.24	-0.47	-0.66	-0.67	-0.08	-0.29	-0.55	-0.9	-0.21	-0.48	-0.65	-0.03	0.1	-0.46	0.49	-0.25	0.055	0.1675	0.48	0.807073	0.439132	0.0924963	1	0.996511	0.695968
Agt	Q3UTR7	-0.79	-0.56	-2.29	-2.14	-0.45	-1.83	-1.42	-1.89	-0.88	-0.7	-1.97	-0.36	-1.92	0.16	-1.5	-1.58	0.0475	0.4675	0.235	0.926279	0.384705	0.692895	1	0.996511	0.955729
Agtpbp1	Q641K1-2	1.26	0.96	0.3	-0.02	0.65	1.24	0.01	0.2	1.34	0.23	0.36	1.13	0.79	0.81	-0.21	-0.21	-0.1	0.14	-0.33	0.793229	0.718716	0.417962	1	0.996511	0.87558
Ahctf1	Q8CJF7	0.33	0.51	0.63	0.95	0.35	0.14	0.79	0.85	0.42	0.96	0.52	-0.04	0.5	1.21	1.17	1.31	-0.0725	-0.14	0.4425	0.756917	0.59574	0.11209	1	0.996511	0.713445
Ahcy	P50247	-0.62	-0.75	-0.46	-0.35	-0.54	-0.75	-0.41	-0.4	-1.14	-0.21	-0.58	-0.73	-1.08	-1	-0.82	-0.93	0.02	-0.12	-0.4125	0.907119	0.618575	0.0505674	1	0.996511	0.658454
Ahcyl1	Q80SW1	0.49	0.58	-0.37	-0.1	0.72	0.51	0.28	-0.21	0.26	-0.14	-0.37	0.62	0.25	0.31	-0.1	-0.11	0.175	-0.0575	-0.0625	0.5656	0.856537	0.821689	1	0.996511	0.972768
Ahcyl2	Q68FL4-2	0.34	-1.42	-1.19	-1.61	0.66	-1.67	-1.47	-2.38	-0.83	-1.24	-2.72	-1.47	1.01	0.19	-1.12	-1.61	-0.245	-0.595	0.5875	0.733071	0.300885	0.397128	1	0.996511	0.867334
Ahcyl2	F8WGT1	0.13	-0.11	-0.08	0.11	0.54	0.28	0.5	0.13	0.07	0.27	-0.05	0.27	-0.16	-0.06	0.43	0.58	0.35	0.1275	0.185	0.0640542	0.470346	0.437587	1	0.996511	0.883161
Ahdc1	Q6PAL7	-0.35	-0.82	-0.96	-0.7	-0.85	-0.47	-0.61	-0.52	-0.54	-0.71	-0.8	-0.47	-0.11	-0.57	-0.56	-0.44	0.095	0.0775	0.2875	0.623994	0.699824	0.213428	1	0.996511	0.786931
Ahi1	E9QP54	-0.35	-0.02	-1.48	-0.86	-0.8	-0.45	-0.27	-0.94	-0.39	-0.05	-1.45	-0.87	0.55	-0.78	0.35	0.04	0.0625	-0.0125	0.7175	0.854871	0.976126	0.110822	1	0.997588	0.712422
Ahnak	E9Q616	-0.16	-0.51	-0.32	0.22	-0.44	-0.5	-0.06	-0.66	-0.23	0.13	-0.14	-0.19	-0.42	0	-0.47	-0.26	-0.2225	0.085	-0.095	0.332235	0.693806	0.682698	1	0.996511	0.955729
Ahnak2	A0A7N9VR94	0.66	0.68	0.88	0.78	1.1	0.08	1.3	0.3	1.14	1.27	1.19	1.24	1.19	1.28	1.29	1.24	-0.055	0.46	0.5	0.854448	0.0165017	0.0153485	1	0.996511	0.589387
Ahsa1	Q8BK64	0.17	0.19	-0.07	-0.28	0.1	-0.22	-0.15	-0.33	-0.75	0.2	-0.32	0.08	-0.8	-0.44	-0.26	-0.33	-0.1525	-0.2	-0.46	0.419955	0.451442	0.0589933	1	0.996511	0.661738
Ahsa2	F6S1R2	0.09	-0.2	-0.52	-0.07	0.24	0.03	0.02	-0.3	-0.06	-0.66	-0.1	-0.11	-0.41	0.17	-0.12	-0.14	0.1725	-0.0575	0.05	0.404349	0.79991	0.823367	1	0.996511	0.972768
Ahsg	P29699	-4.03	-4.47	-4.1	-4.77	-4	-4.6	-4.78	-4.18	-4.51	-2.46	-4.6	-4.15	-3.34	-2.33	-4.78	-4.75	-0.0475	0.4125	0.5425	0.854399	0.411747	0.353456	1	0.996511	0.855029
Aida	Q8C4Q6	0.72	0.25	0.59	1.35	0.15	0.5	0.99	1.31	0.34	1.32	0.73	0.41	-0.12	0.53	0.75	0.65	0.01	-0.0275	-0.275	0.976115	0.931617	0.388031	1	0.996755	0.864251
Aif1	O70200	1.02	0.48	-0.4	0.05	-0.26	0.77	-0.56	-0.05	0.77	-0.69	0.01	0.54	0.87	0.08	-0.82	-0.47	-0.3125	-0.13	-0.3725	0.435366	0.758001	0.417951	1	0.996511	0.87558
Aifm1	B1AU25	0.46	0.57	0.31	0.45	0.48	0.64	0.48	0.34	0.3	-0.2	0.69	0.44	0.26	0.2	0.02	0.27	0.0375	-0.14	-0.26	0.806187	0.543583	0.165551	1	0.996511	0.758837
Aifm2	Q8BUE4	-0.46	-0.28	0.8	0.68	0.64	-0.3	0.82	0.81	0.31	0.3	0.79	-0.43	-0.17	0.31	0.65	0.87	0.3075	0.0575	0.23	0.445864	0.883601	0.553033	1	0.996511	0.916262
Aifm3	Q3TY86	0.58	1.09	0.81	0.57	1.06	1.01	-0.38	0.47	0.83	0.27	0.48	0.76	0.88	0.7	0.51	0.65	-0.2225	-0.1775	-0.0775	0.522371	0.422677	0.707669	1	0.996511	0.957213
Aig1	H7BX91	-4.08	-6.79	-3.4	-11.8	-8.27	-1.36	-5.25	-4.1	5.02	-2.27	-2.4	-5.82	8.79	-8.14	4.73	-6.34	1.7725	5.15	6.2775	0.413701	0.0790027	0.14557	1	0.996511	0.745321
Aimp1	P31230	-1.63	-1.78	-2.16	-1.96	-1.66	-1.76	-2.11	-2.03	-1.71	-1.21	-2.12	-1.61	-1.53	-1.14	-1.76	-2.16	-0.0075	0.22	0.235	0.969041	0.379975	0.390837	1	0.996511	0.865375
Aimp2	Q8R010	-2.31	-2.76	-2.89	-2.8	-2.04	-2.58	-3.05	-2.8	-2.02	-1.37	-2.5	-2.24	-1.53	-1.39	-2.22	-2.9	0.0725	0.6575	0.68	0.780631	0.0437925	0.0896715	1	0.996511	0.69217
Aip	O08915	1.03	-0.19	-0.26	-0.09	0.17	0.82	-0.49	-0.12	-0.34	0.55	-0.34	0.74	-0.11	-0.07	0	-0.33	-0.0275	0.03	-0.25	0.943649	0.94016	0.441956	1	0.996755	0.883549
Ajap1	A2ALI5	5.02	4.08	0.09	0.07	4.87	4.59	-0.45	-0.82	0.48	-1.03	-0.04	5.31	-0.38	1.06	0.3	0.11	-0.2675	-1.135	-2.0425	0.882299	0.513397	0.114182	1	0.996511	0.717287
Ajm1	A2AJA9	1.3	1.18	1.29	1.35	0.94	1.35	0.73	1.04	1.06	0.27	1.37	1.18	0.85	1.02	0.64	0.95	-0.265	-0.31	-0.415	0.165211	0.257419	0.0441872	1	0.996511	0.658454
Ak1	Q9R0Y5	-0.87	-0.73	-0.15	0.31	-0.51	-1.12	-0.28	0.13	-0.68	0.43	-0.25	-0.63	-1.29	-0.13	-0.58	-0.75	-0.085	0.0775	-0.3275	0.813935	0.831233	0.372325	1	0.996511	0.859424
Ak2	Q9WTP6	0.97	0.37	0.06	0.19	0.13	0.65	0.14	-0.22	0.62	0.76	0.42	0.83	0.14	0.83	-0.29	-0.07	-0.2225	0.26	-0.245	0.425836	0.305765	0.453065	1	0.996511	0.885993
Ak3	Q9WTP7	0.87	0.74	1.2	1.46	0.65	0.86	1.43	1.52	0.53	0.75	1.54	0.6	0.29	0.72	1.06	1.17	0.0475	-0.2125	-0.2575	0.861861	0.474207	0.36596	1	0.996511	0.858761
Ak4	Q9WUR9	0.35	0.58	0.52	0.43	0.37	0.4	0.6	0.44	0.07	0.47	0.73	0.17	0.07	0.41	0.09	0.34	-0.0175	-0.11	-0.2425	0.906452	0.59371	0.21111	1	0.996511	0.786269
Ak5	Q920P5	-0.66	-0.56	-0.65	-0.63	-0.36	-0.67	-0.78	-0.71	-0.29	-0.23	-0.67	-0.49	-0.03	0.01	-0.74	-0.78	-0.005	0.205	0.24	0.974897	0.259842	0.352139	1	0.996511	0.854088
Akap1	O08715	0.28	0.24	0.03	0.18	0.1	0.49	-0.06	0.22	0.67	0.38	0.29	0.4	0.78	0.26	0.28	0.3	0.005	0.2525	0.2225	0.97734	0.169367	0.287494	1	0.996511	0.824705
Akap10	O88845	0.71	0.63	0.82	0.24	0.78	0.72	0.69	0.7	-0.16	-0.14	0.7	0.7	0.01	-0.16	0.54	0.57	0.1225	-0.325	-0.36	0.492339	0.274144	0.182619	1	0.996511	0.776002
Akap11	E9Q777	-0.31	-0.01	0.18	-0.02	1.49	-0.33	-0.33	-0.07	0.11	0.03	-0.17	0.04	-1.09	1.17	-0.56	0.03	0.23	0.0425	-0.0725	0.588028	0.815465	0.876285	1	0.996511	0.979626
Akap12	Q9WTQ5	0.37	0.44	0.54	0.63	0.16	0.13	0.51	0.76	1.05	1.18	0.73	0.84	0.89	0.92	1.08	0.79	-0.105	0.455	0.425	0.595244	0.0315535	0.038052	1	0.996511	0.658454
Akap13	E9Q394-2	-2.73	-1.28	-1.57	-1.01	-1.4	-2.9	-2.13	-2.08	-1.52	-0.57	-0.93	-2.3	-0.89	-2.5	-0.42	-2.1	-0.48	0.3175	0.17	0.305628	0.528428	0.766165	1	0.996511	0.964134
Akap5	H3BIV5	2	1.25	0.96	1.68	0.86	1.07	0.93	1.2	1.65	1	0.86	1.38	1.42	1.66	0.99	0.59	-0.4575	-0.25	-0.3075	0.0982618	0.411691	0.366963	1	0.996511	0.858904
Akap6	E9Q9K8	0.72	0.94	0.62	0.07	0.73	0.71	0.82	0.3	0.25	0.81	0.35	1.19	0.93	0.66	0.83	0.67	0.0525	0.0625	0.185	0.823716	0.831357	0.442863	1	0.996511	0.883549
Akap7	Q7TN79	1.39	1.59	1.26	1.1	1.39	1.34	1.02	0.89	1.87	1.9	1.13	1.45	1.7	2.1	1.55	0.76	-0.175	0.2525	0.1925	0.3818	0.30671	0.538241	1	0.996511	0.912212
Akap8	Q9DBR0	0.63	-1.92	-2.76	-2.72	-1.82	-0.07	-3.72	-2.64	-1.53	-1.89	-2.51	-0.59	-1.1	-1.64	-2.06	-3.34	-0.37	0.0625	-0.3425	0.710875	0.938237	0.683475	1	0.996755	0.955729
Akap8l	A0A494B9L0	0.14	-1.13	-0.7	-0.73	-1.68	-0.47	-1.09	-0.19	-0.48	-0.9	-0.63	-1.48	0.76	-0.72	-0.3	-1.25	-0.2525	-0.2675	0.2275	0.534484	0.441337	0.632026	1	0.996511	0.941132
Akap9	E9QQ10	-0.72	-0.96	-1.62	-1.45	-0.85	-1.09	-1.26	-1.56	-0.75	-0.56	-1.27	-1	-0.64	-0.63	-1.07	-1.29	-0.0025	0.2925	0.28	0.992453	0.302227	0.338757	1	0.996511	0.847578
Akr1a1	Q9JII6	0.47	0.06	-0.08	-0.65	-0.34	0.45	-0.53	-0.29	0.41	-1.02	-0.3	0.23	0.82	-0.7	-0.46	-0.82	-0.1275	-0.12	-0.24	0.683301	0.7535	0.573691	1	0.996511	0.925747
Akr1b1	P45376	0	-0.91	-0.64	-0.76	-0.57	0.01	-0.51	-0.75	-1.46	-0.55	-0.68	-0.04	-1.44	-1.09	-0.82	-0.95	0.1225	-0.105	-0.4975	0.646383	0.76368	0.0893561	1	0.996511	0.69217
Akr1b10	G5E895	1.22	0.59	0.89	0	1.14	1.43	0.76	0.74	-1.05	-0.98	0.96	0.7	-1.27	-0.85	0.61	1	0.3425	-0.7675	-0.8025	0.278095	0.186328	0.177241	1	0.996511	0.772068
Akr1b7	P21300	-1.02	-0.74	-1.49	-0.81	-0.37	-1.87	-0.99	-0.48	-2.07	-1.78	-0.53	-2.55	-2.69	0.31	-1.29	-2.25	0.0875	-0.7175	-0.465	0.8104	0.12817	0.46499	1	0.996511	0.888267
Akr1e2	Q9DCT1	-0.66	-0.7	-1.19	-1.2	-0.29	-0.8	-0.92	-1.08	-1.05	-1.24	-1.1	-0.9	-1.29	-0.49	-1.5	-1.43	0.165	-0.135	-0.24	0.50051	0.522455	0.421122	1	0.996511	0.875639
Akr7a2	Q8CG76	-0.02	0.13	0.17	0.29	-0.07	-0.14	-0.02	0.06	-0.14	-0.06	-0.02	-0.39	0.17	-0.49	-0.07	-0.27	-0.185	-0.295	-0.3075	0.240429	0.120607	0.171151	1	0.996511	0.762774
Akt1	P31750	-0.61	-0.75	-0.99	-1.37	-0.67	-0.83	-1.06	-1.29	-0.82	-1.52	-1.21	-0.94	-0.46	-1.09	-1.47	-1.49	-0.0325	-0.1925	-0.1975	0.888917	0.450521	0.521303	1	0.996511	0.907667
Akt1s1	Q9D1F4	2.17	0.9	0.45	0.28	0.81	1.78	1.09	0.24	0.94	0.39	0.61	1.74	0.37	1.14	-0.13	0.22	0.03	-0.03	-0.55	0.951421	0.950598	0.263958	1	0.996755	0.816045
Akt2	Q60823	-0.43	-0.38	0.21	0.21	0.17	0.09	0.73	0.08	-0.06	0.05	-0.01	-0.15	-0.22	0.15	-0.24	-0.09	0.365	0.055	-0.0025	0.167658	0.802822	0.991636	1	0.996511	0.996154
Akt3	Q9WUA6	-0.46	-0.37	-0.22	0.44	-0.1	-0.51	-0.23	0.38	-0.46	0.28	0.02	-0.2	-0.57	0.03	-0.12	-0.23	0.0375	0.0625	-0.07	0.893005	0.818555	0.792947	1	0.996511	0.96933
Aktip	D3Z632	-2.33	-2.37	-1.07	-1.44	-1.82	-2.18	-0.98	-1.37	-2.78	-0.34	-1.14	-2.54	-2.94	-1.16	-1.41	-1.58	0.215	0.1025	0.03	0.588666	0.86629	0.950293	1	0.996511	0.992476
Alad	P10518	-0.59	-0.76	-0.85	-0.73	-0.7	-0.75	-1.2	-0.97	-0.82	-0.78	-1.2	-0.72	-0.99	-0.07	-1.46	-1.19	-0.1725	-0.1475	-0.195	0.338742	0.431131	0.539795	1	0.996511	0.912212
Alb	P07724	-5.88	-7.07	-4.97	-4.85	-5.67	-5.72	-4.64	-5.03	-6.39	-3.03	-4.78	-5.44	-5.51	-4.33	-5.05	-5.51	0.4275	0.7825	0.5925	0.428209	0.33686	0.289725	1	0.996511	0.825111
Alcam	E9Q3Q6	1.15	0.56	0.31	0.95	0.91	1.5	0.61	0.99	1.47	1.02	0.53	1.66	1.11	1.52	0.62	0.57	0.26	0.4275	0.2125	0.349349	0.200022	0.491847	1	0.996511	0.897531
Aldh16a1	D3Z0B9	1.59	0.41	1.41	0.48	0.21	0.57	-0.9	-0.06	0.52	0.42	-0.18	0.16	2.14	0.78	1.3	-0.63	-1.0175	-0.7425	-0.075	0.0338643	0.0537153	0.900816	1	0.996511	0.983757
Aldh18a1	Q9Z110	0.49	0.55	0.71	0.58	0	0.53	0.26	0.58	0.48	0.78	0.64	0.45	0.22	0.07	0.14	0.36	-0.24	0.005	-0.385	0.214844	0.976372	0.0529655	1	0.997588	0.661271
Aldh18a1	Q9Z110-2	-0.64	-0.96	-0.3	0	-1.15	-1.17	0.34	-0.48	-0.68	-0.8	0.51	-0.57	-1.26	0.47	-1.14	-1.08	-0.14	0.09	-0.2775	0.720663	0.801498	0.529224	1	0.996511	0.908663
Aldh1a1	P24549	1.46	0.51	0.55	0.85	1.04	1.04	0.57	1.28	1.17	-0.22	0.46	1.41	0.23	1.18	0.2	0.12	0.14	-0.1375	-0.41	0.607637	0.737121	0.240874	1	0.996511	0.795697
Aldh1a2	Q62148	-2.5	-2.97	-1.74	-1.63	-2.79	-2.09	-1.24	-1.88	-2.5	-0.47	-1.53	-2.53	-2.03	-1.59	-2.26	-1.48	0.21	0.4525	0.37	0.621752	0.410629	0.321815	1	0.996511	0.840788
Aldh1a7	O35945	-0.2	0.15	-0.09	-0.88	-0.72	0.06	-0.06	-0.69	1.79	0.23	0.03	0.43	0.32	0.94	-1.25	-0.48	-0.0975	0.875	0.1375	0.745108	0.0688589	0.779592	1	0.996511	0.967289
Aldh1b1	Q9CZS1	0.65	0.37	0.39	0.91	-0.11	0.58	0.58	0.7	0.72	0.43	0.55	0.51	0.42	0.79	0.18	0.04	-0.1425	-0.0275	-0.2225	0.556498	0.887563	0.373953	1	0.996511	0.859424
Aldh1l1	Q8R0Y6	0.5	-0.2	-0.24	0.25	0.43	0.79	0.27	0.02	0.03	-0.18	0	0.03	-0.13	0.17	-0.51	-0.15	0.3	-0.1075	-0.2325	0.254333	0.630983	0.377536	1	0.996511	0.860984
Aldh1l2	Q8K009	0.38	0.45	0.49	0.72	0.24	0.67	0.45	0.66	-0.25	-0.64	0.33	0.14	-0.48	-0.41	-0.55	-0.57	-0.005	-0.615	-1.0125	0.977145	0.0345271	0.000326464	1	0.996511	0.270112
Aldh2	P47738	0.55	0.36	0.49	0.73	0.18	0.38	0.89	0.68	0.64	0.27	0.7	0.12	0.76	0.17	1.04	0.36	4.90654e-17	-0.1	0.05	1	0.629706	0.839041	1	0.996511	0.976218
Aldh3a2	B1AV77	1.13	1.38	0.88	1.08	1.36	1.03	1.23	0.95	1.19	0.71	0.67	1.03	0.61	1.14	1	1.12	0.025	-0.2175	-0.15	0.890934	0.309638	0.491442	1	0.996511	0.897531
Aldh3b1	Q80VQ0	1.66	1.66	0.83	0.83	1.79	1.11	1.22	0.44	0.76	0.77	0.08	1.14	0.13	0.57	1.09	0.95	-0.105	-0.5575	-0.56	0.765725	0.11404	0.11361	1	0.996511	0.716416
Aldh4a1	Q8CHT0	0.94	1.01	0.83	1.13	0.6	0.76	0.94	0.75	1.01	0.56	0.97	0.66	0.92	0.44	0.8	0.91	-0.215	-0.1775	-0.21	0.197721	0.356714	0.304461	1	0.996511	0.831662
Aldh5a1	Q8BWF0	1.51	1.4	0.8	0.68	1.01	1.7	1.03	0.85	0.61	-0.24	0.89	1.19	0.78	-0.4	0.52	0.88	0.05	-0.485	-0.6525	0.859997	0.203628	0.0935303	1	0.996511	0.698156
Aldh6a1	Q9EQ20	1.87	0.8	0.67	1.12	0.68	1.76	1.24	0.93	0.72	0.74	0.81	1.13	0.55	0.36	0.48	0.82	0.0375	-0.265	-0.5625	0.912889	0.377681	0.0873363	1	0.996511	0.691619
Aldh7a1	Q9DBF1-2	0.59	0.51	0.11	0.27	0.73	0.51	0.7	0.17	-0.1	0.13	0.09	0.21	-0.29	0.17	-0.21	0.14	0.1575	-0.2875	-0.4175	0.44292	0.151431	0.0797198	1	0.996511	0.681818
Aldh9a1	Q9JLJ2	-0.23	-0.47	-0.31	-0.25	0.02	-0.03	0.56	-0.02	-0.37	0.07	-0.43	-0.41	-0.32	-0.19	-0.39	-0.13	0.4475	0.03	0.0575	0.0413808	0.873778	0.745815	1	0.996511	0.960079
Aldoa	A6ZI44	-0.11	-0.8	-0.16	0.88	-0.54	-0.96	0.68	0.61	0.61	1.36	0.97	0.38	0.46	0.68	0.53	1.38	-0.005	0.8775	0.81	0.991964	0.0488374	0.0651104	1	0.996511	0.66433
Aldoa	P05064	-0.49	-0.73	-0.8	-0.68	-0.75	-0.42	-0.74	-0.64	-0.45	-0.5	-0.71	-0.26	-0.8	-0.55	-1.01	-1.09	0.0375	0.195	-0.1875	0.816932	0.295508	0.36653	1	0.996511	0.858904
Aldoc	P05063	0.87	0.13	0.16	0.61	0.56	0.35	0.39	0.56	0.5	0.35	0.29	0.26	-0.29	0.56	-0.27	0.08	0.0225	-0.0925	-0.4225	0.916314	0.679934	0.165252	1	0.996511	0.758837
Alg1	Q921Q3	2.03	1.4	0.66	0.57	1.51	1.81	0.78	0.44	1.92	0.89	0.17	1.63	1.68	1.79	1.05	0.86	-0.03	-0.0125	0.18	0.945109	0.979472	0.653094	1	0.998773	0.947633
Alg10b	Q3UGP8	-0.61	0.21	-0.59	-0.55	0.73	-0.24	0.47	-0.11	-0.29	-0.17	-0.3	-0.49	-0.86	0.51	-0.01	0.16	0.5975	0.0725	0.335	0.0751241	0.761011	0.351348	1	0.996511	0.853984
Alg11	Q3TZM9	-0.15	0.19	-1.32	-1.16	0.65	0	0.22	-0.93	0.11	-2.33	-1.3	-0.19	0	0.06	-0.8	-0.49	0.595	-0.3175	0.3025	0.221372	0.607333	0.465502	1	0.996511	0.888369
Alg13	Q9D8C3	-1.28	0.53	1.01	1.33	2.7	5.22	1.33	0.45	0	-0.15	0.61	-0.94	0.36	2.68	0.44	1.44	2.0275	-0.5175	0.8325	0.0854181	0.405247	0.266702	1	0.996511	0.818426
Alg2	Q9DBE8	-0.36	-0.66	-0.32	-0.56	-0.21	-0.43	0.44	-0.28	-0.85	-0.39	-0.3	-0.5	-0.55	-0.04	0.21	0.2	0.355	-0.035	0.43	0.146864	0.85892	0.0962561	1	0.996511	0.698156
Alg3	A0A338P7B5	0.1	1	0.31	-0.34	0.02	1.28	1.66	0.72	0.75	1.56	1.12	1.15	-0.04	1.19	1.38	1.3	0.6525	0.8775	0.69	0.150563	0.0230263	0.125218	1	0.996511	0.721448
Alg5	Q9DB25	0	0.23	-0.22	-0.11	0.45	-0.34	0.03	-0.32	-0.1	0.1	-0.38	-0.13	0.12	0.64	0.17	0.36	-0.02	-0.1025	0.3475	0.930308	0.597529	0.125307	1	0.996511	0.721448
Alg9	Q8VDI9	0.17	0.1	-0.74	-0.23	-0.39	0.86	-1.57	-0.81	1.83	-0.46	-0.94	-0.22	2.94	-0.72	0.14	-0.26	-0.3025	0.2275	0.7	0.554102	0.701883	0.373274	1	0.996511	0.859424
Alk	P97793	-0.06	0.01	-0.66	0.06	-0.32	-0.03	-0.23	0.14	1.12	0.56	-0.48	-0.18	0.91	0.33	-0.05	-0.51	0.0525	0.4175	0.3325	0.811709	0.293602	0.346397	1	0.996511	0.851096
Alkbh3	Q8K1E6	-0.38	-0.5	-1.09	-0.81	-2.66	-0.03	-4.46	-1.55	-1.81	-4.94	-2.49	-0.44	-0.02	-8.36	-2.8	-2.54	-1.48	-1.725	-2.735	0.110332	0.0721767	0.108515	1	0.996511	0.707441
Alkbh5	Q3TSG4	-0.9	-0.86	-2.72	-2.21	-0.97	-1.35	-2.39	-2.03	-0.34	-0.73	-2.51	-0.73	-0.93	-0.82	-2.2	-2.21	-0.0125	0.595	0.1325	0.980912	0.349272	0.812852	1	0.996511	0.972768
Alkbh6	Q8K2U2	-1.79	-1.61	0.48	-0.74	-1.6	-2.03	0.17	0.53	-1.55	-0.2	0.16	-1.62	-1	-1.31	0.21	0.52	0.1825	0.1125	0.52	0.805686	0.858734	0.415504	1	0.996511	0.874945
Alkbh7	Q9D6Z0	-0.06	-0.72	-0.92	-0.59	-0.68	0.35	-0.22	0.09	0.38	-1.36	-0.45	-0.99	-0.88	-2.11	-0.62	-1.66	0.4575	-0.0325	-0.745	0.139735	0.935412	0.0768589	1	0.996755	0.67615
Alkbh8	Q80Y20-2	0.81	0.3	1	0.66	-0.6	0.71	1.03	0.9	0.26	-0.75	0.92	0.78	-0.89	-0.07	1.1	0.95	-0.1825	-0.39	-0.42	0.635888	0.331871	0.374084	1	0.996511	0.859424
Alox5ap	A0A0J9YUC8	0.4	0.91	0.73	0.83	0.54	0.66	1.33	-0.91	0.21	3.85	0.75	0.68	-0.6	0.32	0.36	1.71	-0.3125	0.655	-0.27	0.494559	0.400777	0.561403	1	0.996511	0.91997
Alpl	P09242	0.1	0.18	-0.25	0.02	0.13	-0.27	-1.19	-0.54	-0.21	-1.07	-0.45	-0.2	0.01	-0.19	0.02	-0.64	-0.48	-0.495	-0.2125	0.128075	0.073043	0.361456	1	0.996511	0.858475
Als2	Q920R0	-0.25	0.88	0.47	0.16	1.01	-0.1	0.05	0.01	0.86	0.23	0.34	0.36	0.96	1.29	0.5	0.43	-0.0725	0.1325	0.48	0.831144	0.646429	0.1591	1	0.996511	0.754492
Alyref	O08583	0.99	-0.96	-0.63	-0.63	-0.97	0.11	-0.3	-0.09	-1.3	-2.66	-0.6	-1.1	-1.46	-1.23	-0.03	-0.44	-0.005	-1.1075	-0.4825	0.991365	0.0802713	0.359802	1	0.996511	0.856645
Amacr	O09174	1.4	1.07	0.65	0.78	1.01	1.09	0.98	0.9	0.94	0.54	0.76	1.4	0.51	0.87	0.64	0.77	0.02	-0.065	-0.2775	0.921377	0.80624	0.245849	1	0.996511	0.802442
Ambra1	A2AH22-7	-2.18	-2.23	-1.89	-2.42	-2.5	-1.51	-2.13	-2.18	-0.22	-1.43	-2.18	-2.44	1.83	-2.66	-1.42	-1.98	0.1	0.6125	1.1225	0.687077	0.220395	0.23248	1	0.996511	0.788994
Amdhd2	F6UP77	4.49	2.36	2.31	0.14	4.05	4.62	2.34	1.57	-0.75	-0.44	2.2	4.52	-0.78	0.13	2.12	2.52	0.82	-0.9425	-1.3275	0.431257	0.494915	0.232062	1	0.996511	0.788863
Amer2	A0A0R4J030	-0.46	-0.46	0.14	-0.01	-0.31	-0.37	-0.18	-0.38	-0.52	0.29	-0.08	-0.48	-0.47	-0.1	-0.25	0.02	-0.1125	1.17757e-16	-0.0025	0.570238	1	0.991361	1	1	0.996154
Amer3	Q6NS69	-0.83	0.98	-0.62	-0.63	0.15	-1.29	-1.57	-0.77	1.4	0.51	-0.01	0.65	3.21	0.31	-0.01	-0.11	-0.595	0.9125	1.125	0.271575	0.0839205	0.187716	1	0.996511	0.776843
Amfr	Q9R049-2	0.01	-0.21	-0.36	-0.51	0.41	-0.18	0.17	-0.25	0.88	-0.28	-0.52	0.16	1.17	1.3	0.53	0.13	0.305	0.3275	1.05	0.18169	0.329266	0.00739524	1	0.996511	0.552614
Amigo1	Q80ZD8	0.69	0.91	0.67	1.08	1.26	0.75	0.82	0.67	0.91	0.84	0.49	0.85	0.85	1.72	0.2	0.7	0.0375	-0.065	0.03	0.849843	0.735526	0.92823	1	0.996511	0.98946
Amigo2	Q80ZD9	0.84	2.31	-0.07	0.67	2.05	0.64	0.77	0.34	1.01	1.25	0.66	1.34	0.24	3.15	0.68	1.12	0.0125	0.1275	0.36	0.982535	0.793225	0.626997	1	0.996511	0.939737
Amot	Q8VHG2-2	0.99	0.5	1.16	1.13	0.66	1.52	1.16	0.99	1.57	1.41	1.23	1.12	2.29	0.27	1.19	1.29	0.1375	0.3875	0.315	0.582773	0.105421	0.461385	1	0.996511	0.887902
Amotl1	A0A1Y7VM69	1.31	1.4	0.42	0.24	0.99	1.3	0.48	0.37	2.06	0.13	0.51	2.07	2.25	1.15	0.13	0.26	-0.0575	0.35	0.105	0.871292	0.525955	0.843377	1	0.996511	0.976225
Amotl2	B8JK87	-2.18	-1.05	-1.24	1.45	-2.24	-1.68	-0.58	0.04	1.69	-3.95	1.32	-1.83	1.74	-1.42	1.74	0.84	-0.36	0.0625	1.48	0.669451	0.963985	0.150583	1	0.996755	0.749304
Ampd2	A2AE27	0.73	0.71	-0.12	-0.14	0.67	0.4	-0.08	-0.06	0.07	-0.84	-0.27	0.58	-0.16	0.52	0.03	-0.38	-0.0625	-0.41	-0.2925	0.836704	0.289563	0.370185	1	0.996511	0.859245
Ampd3	A0A1L1SRX2	1.37	0.08	0.18	1.19	0.86	0.61	0.32	0.68	0.1	-0.04	0.27	0.96	0.01	0.78	0.05	0.27	-0.0875	-0.3825	-0.4275	0.797658	0.33588	0.267314	1	0.996511	0.818895
Amph	Q7TQF7	0.58	0.65	-0.12	0.11	0.71	0.4	-0.67	-0.75	0.68	0.1	-0.48	0.54	0.85	0.54	-0.48	-0.67	-0.3825	-0.095	-0.245	0.343085	0.767329	0.546646	1	0.996511	0.912406
Amt	Q8CFA2	0.11	0.11	0.33	0.54	0	0.17	1.44	0.45	-0.17	0.18	1.23	0	0.63	0.08	0.71	0.52	0.2425	0.0375	0.2125	0.468021	0.909278	0.353828	1	0.996744	0.855029
Amz2	B1AT59	-0.08	-0.57	-0.63	-0.63	-0.78	-0.16	-0.71	-0.62	0.1	-1.58	-0.41	-0.08	0.01	-1.98	-0.76	-0.25	-0.09	-0.015	-0.2675	0.68054	0.968901	0.545513	1	0.996755	0.912258
Anapc1	P53995	-0.75	-0.68	-0.67	-0.67	-0.42	-1.06	-0.65	-0.88	-1.05	-0.55	-0.73	-0.71	-1.06	-0.73	-0.89	-0.63	-0.06	-0.0675	-0.135	0.743951	0.703201	0.467564	1	0.996511	0.889213
Anapc13	Q8R034	-0.98	-0.13	-0.93	-1.31	-0.25	-1.83	-1.55	-0.91	-0.97	-1.81	-0.9	-1.65	-0.9	0.5	-0.64	-0.44	-0.2975	-0.495	0.4675	0.471575	0.167931	0.243039	1	0.996511	0.798789
Anapc16	Q9CPV2	-1.05	-0.81	-0.7	-0.54	-1.3	-1.66	-0.66	-1.37	-1.58	-0.52	-1.16	-0.43	-0.88	-0.67	-1.62	-1.46	-0.4725	-0.1475	-0.3825	0.0850848	0.624396	0.186828	1	0.996511	0.776843
Anapc2	Q8BZQ7	-0.76	-0.82	0.03	-0.22	-0.58	-1.1	-0.04	-0.16	-0.87	0.23	-0.06	-0.89	-1.04	-0.5	-0.18	0.09	-0.0275	0.045	0.035	0.929654	0.896488	0.91403	1	0.996511	0.986458
Anapc4	Q91W96	-0.54	-0.25	-0.44	-0.5	-0.33	-0.77	0.07	-0.54	-0.37	-1.13	-0.68	-0.69	-0.92	0	-1.05	-0.26	0.04	-0.285	-0.125	0.852583	0.20049	0.658879	1	0.996511	0.949645
Anapc5	A0A0G2JE03	-0.9	-0.46	-0.35	-0.79	-0.71	-1.05	-0.32	-0.95	-0.64	-0.28	-0.5	-0.74	-0.59	-0.04	-0.54	-0.66	-0.1325	0.085	0.1675	0.565834	0.684771	0.481674	1	0.996511	0.893906
Anapc7	Q9WVM3	0.72	0.37	-0.07	0.21	0.91	0.34	-0.23	-0.22	0.88	0.53	-0.01	0.78	0.79	-0.1	0.03	-0.15	-0.1075	0.2375	-0.165	0.731389	0.395001	0.573735	1	0.996511	0.925747
Angel2	Q8K1C0-3	-0.3	-0.1	-0.71	0.12	-0.93	-0.01	-0.31	-0.21	0.17	-1.13	-0.56	-0.44	0.38	-0.98	-1.13	-0.76	-0.1175	-0.2425	-0.375	0.666156	0.456218	0.332993	1	0.996511	0.845601
Ank1	A0A0R4J1N7	0.59	0.19	0.76	1.5	0.42	0.73	0.78	1.25	0.12	0.09	0.52	-0.17	0.1	0.41	0.37	0.57	0.035	-0.62	-0.3975	0.911952	0.0734183	0.211745	1	0.996511	0.786269
Ank2	S4R2D6	1.5	0.88	1.28	1.11	0.3	1.51	1.06	2.01	1.2	0.71	1.72	1.82	0.82	0.92	1.91	1.91	0.0275	0.17	0.1975	0.940386	0.568605	0.555049	1	0.996511	0.916796
Ank2	Q8C8R3-7	0.57	0.72	1.64	1.86	-1.02	1.08	0.12	1.75	2.17	1.4	1.41	0.3	3.04	-0.14	1.73	1.14	-0.715	0.1225	0.245	0.269221	0.794814	0.714949	1	0.996511	0.958106
Ank2	Q8C8R3-2	1.52	1.26	1.61	1.32	1.43	1.1	1.39	1.74	1.18	0.86	1.76	1.4	0.95	1.67	1.4	1.48	-0.0125	-0.1275	-0.0525	0.948071	0.591768	0.813708	1	0.996511	0.972768
Ank2	Q8C8R3-4	0.75	0.79	0.65	0.8	0.69	0.69	0.7	0.8	1.01	0.64	0.79	0.89	1.19	0.58	0.86	0.49	-0.0275	0.085	0.0325	0.844423	0.61408	0.880116	1	0.996511	0.979626
Ank3	S4R2K9	1.05	0.69	0.88	0.94	0.6	0.9	0.71	0.75	0.8	0.69	0.84	0.77	0.74	0.71	0.68	0.68	-0.15	-0.115	-0.1875	0.361222	0.494297	0.301876	1	0.996511	0.830681
Ank3	A0A087WNU5	1.39	0.96	0.62	0.88	0.81	0.79	0.23	0.23	0.96	0.96	0.67	1.1	0.9	1.41	0.38	0.18	-0.4475	-0.04	-0.245	0.0940159	0.856145	0.457469	1	0.996511	0.887902
Ank3	A0A087WRP9	0.65	0.94	-0.07	-0.28	1.58	0.69	-0.9	0.22	1.67	1.77	-0.86	1.4	1.52	0.27	-1.47	-0.48	0.0875	0.685	-0.35	0.871922	0.292505	0.583602	1	0.996511	0.927734
Ank3	G5E8K2	-0.34	-0.33	-0.78	-0.37	-0.16	-0.75	-0.03	-0.16	-0.32	-1.38	-0.29	-0.53	-0.51	-0.25	-0.81	-0.53	0.18	-0.175	-0.07	0.419623	0.547021	0.743561	1	0.996511	0.959321
Ankfn1	F6X7B3	0.79	0.33	1.88	2.33	0.45	0.55	1.76	3.26	-0.1	1.94	1.42	-0.25	0.29	-0.39	0.45	3.82	0.1725	-0.58	-0.29	0.81271	0.386752	0.758758	1	0.996511	0.963116
Ankfy1	Q810B6	-0.2	-0.35	-0.22	-0.24	-0.21	-0.36	-0.22	-0.24	-0.58	-0.18	-0.22	-0.32	-0.64	-0.24	-0.54	-0.46	-0.005	-0.0725	-0.2175	0.97175	0.674361	0.249187	1	0.996511	0.804842
Ankh	Q9JHZ2	-2.06	-1.75	-1.27	-1.66	-1.26	-1.93	-1.28	-1.33	-1.41	-1.49	-1.21	-2	-1.34	-0.75	-1.6	-1.26	0.235	0.1575	0.4475	0.347188	0.541538	0.120862	1	0.996511	0.721448
Ankhd1	E9Q1M6	-2.08	-1.53	-1.35	-1.38	-2.22	-1.7	-1.05	-0.87	-1.26	-0.76	-1.22	-1.89	-0.51	-2.22	-1.51	-1.46	0.125	0.3025	0.16	0.714909	0.320115	0.674844	1	0.996511	0.952944
Ankib1	Q6ZPS6	0.56	0.64	0.6	0.42	0.65	0.6	0.46	0.21	1	0.86	0.56	0.93	1.21	0.67	0.68	0.57	-0.075	0.2825	0.2275	0.653204	0.137799	0.295996	1	0.996511	0.825612
Ankle2	Q6P1H6	0.41	0.43	-0.47	-0.04	0.55	0.4	-0.55	-0.43	0.41	0.29	-0.68	0.46	0.22	1.12	-0.14	-0.51	-0.09	0.0375	0.09	0.792203	0.911883	0.820132	1	0.996744	0.972768
Ankmy1	E0CYY3	-2.24	-2.33	0.07	-0.65	-3.88	-1.36	0.99	-0.56	0.14	-0.59	1.28	-0.93	1.39	-4.02	-0.12	-0.38	0.085	1.2625	0.505	0.935791	0.0990881	0.662787	1	0.996511	0.94972
Ankmy2	Q3TPE9	0.62	-0.47	0	0.28	0.07	-0.3	0.98	0.44	-0.03	0.02	0.11	0.07	0.48	0.04	0.69	0.77	0.19	-0.065	0.3875	0.584565	0.798304	0.21378	1	0.996511	0.786931
Ankrd13a	Q80UP5	-0.7	-0.86	0.43	-0.15	-0.8	-0.5	0.14	-0.17	-0.22	0.72	0.07	-0.6	-0.09	-0.6	0.22	0.06	-0.0125	0.3125	0.2175	0.970957	0.429678	0.529657	1	0.996511	0.908663
Ankrd13c	Q3UX43	-0.14	-0.17	-0.08	-0.26	0.57	-0.23	0.15	-0.14	-0.81	-0.76	0.01	-0.22	-0.84	-0.45	-0.24	-0.36	0.25	-0.2825	-0.31	0.256259	0.249595	0.149195	1	0.996511	0.748169
Ankrd13d	Q6PD24	0.6	0.1	0.27	0.13	-0.01	0.44	0.41	0.42	0.11	0.04	0.39	0.56	0.13	0.49	0.65	0.24	0.04	3.92523e-17	0.1025	0.836724	1	0.639143	1	1	0.942804
Ankrd17	A0A0G2JDZ9	-2.51	-2.65	-2.42	-2.4	-2.28	-2.55	-2.11	-2.46	-2.28	-1.27	-2.1	-2.24	-2.26	-1.88	-2.62	-2.7	0.145	0.5225	0.13	0.39813	0.0732346	0.586316	1	0.996511	0.928178
Ankrd27	Q3UMR0-3	-0.2	0.17	0.22	0.24	0.96	0.05	-0.12	0.08	0.24	1.45	0.45	-0.08	0.1	0.69	0.31	0.13	0.135	0.4075	0.2	0.619629	0.251935	0.376956	1	0.996511	0.860984
Ankrd28	Q505D1	-0.15	-0.1	-0.28	-0.48	-0.07	-0.23	-0.37	-0.69	-0.19	-0.23	-0.32	-0.06	-0.5	-0.18	-0.5	-0.5	-0.0875	0.0525	-0.1675	0.652694	0.762989	0.39329	1	0.996511	0.865775
Ankrd29	D3YTU5	0.86	0.78	1.02	0.97	0.58	0.43	0.77	0.73	0.1	0.81	0.64	0.22	-0.01	0.47	0.8	0.54	-0.28	-0.465	-0.4575	0.105139	0.0566295	0.0681632	1	0.996511	0.664936
Ankrd33b	Q3U0L2	0.96	0.44	1.44	1.21	0.8	0.68	0.05	1.26	1.09	0.62	0.85	0.32	1.53	1.12	0.18	0.42	-0.315	-0.2925	-0.2	0.340924	0.314672	0.592235	1	0.996511	0.929843
Ankrd34a	B2RW11	0.15	-0.16	1.22	0.41	-0.68	0.33	0.48	1.02	1.49	0.21	1.18	0.31	2.43	-0.25	1.02	0.74	-0.1175	0.3925	0.58	0.78578	0.354528	0.328952	1	0.996511	0.844943
Ankrd34b	Q3UUF8	0.24	0.33	1.33	1.28	0.31	0.06	1.4	1.16	0.67	1.05	1.29	0.5	1.05	0.71	1.17	1.17	-0.0625	0.0825	0.23	0.879329	0.808698	0.479968	1	0.996511	0.893906
Ankrd40	Q5SUE8-2	0.11	0.14	-0.57	-0.19	-0.13	0.46	-0.11	-0.31	0.8	-0.02	-0.4	0.51	0.42	0.76	-0.32	-0.15	0.105	0.35	0.305	0.673191	0.285783	0.338599	1	0.996511	0.847578
Ankrd44	E9QNQ2	-0.41	0.56	0.14	0.6	0.32	0.09	0.46	0.51	0.42	1.16	0.7	0.16	0.42	0.58	0.37	0.64	0.1225	0.3875	0.28	0.641516	0.244173	0.31287	1	0.996511	0.835247
Ankrd45	Q810N6	1.44	-0.06	0.47	0.18	0.92	0.25	-0.86	-0.05	-0.02	0.27	-1.03	-0.27	0.93	0.8	-0.41	-0.79	-0.4425	-0.77	-0.375	0.348841	0.0884519	0.464873	1	0.996511	0.888267
Ankrd46	Q8BTZ5	-0.06	-0.02	-2.86	-2.1	0.39	-0.04	-1.63	-3.11	0.9	-0.33	-2.77	0.21	0.84	1.75	-2.04	-2.04	0.1625	0.7625	0.8875	0.866453	0.439019	0.423162	1	0.996511	0.875782
Ankrd49	Q8VE42	0.55	0.51	-0.05	-0.19	0.69	0.65	-0.37	-0.1	-0.01	-0.39	-0.18	0.35	0.65	-0.18	-0.07	-0.48	0.0125	-0.2625	-0.225	0.968852	0.334123	0.480316	1	0.996511	0.893906
Ankrd50	F7BE84	0.85	0.29	-0.03	0.23	0.48	0.01	0.33	0.3	0.72	0.22	0.31	0.16	1.14	0.49	-0.05	0.06	-0.055	0.0175	0.075	0.810594	0.943735	0.820554	1	0.996755	0.972768
Ankrd52	Q8BTI7	-0.81	-0.58	-0.74	-0.14	0.07	-0.35	-0.2	-0.53	-0.3	-0.34	-0.51	-0.69	-1.17	-0.11	-0.09	0.46	0.315	0.1075	0.34	0.177386	0.619419	0.365028	1	0.996511	0.858475
Ankrd54	Q91WK7	-1.8	-1.06	-0.96	-1.38	-0.71	-1.93	-1.45	-1.62	-0.75	-0.27	-1.5	-1.7	-0.27	-0.72	-1.37	-1.06	-0.1275	0.245	0.445	0.686674	0.513594	0.177656	1	0.996511	0.772068
Ankrd63	A2ARS0	1.32	0.17	0.38	0.97	-0.47	-0.06	0.82	0.58	0.67	0.67	-0.36	0.66	0.42	0.34	0.77	0.19	-0.4925	-0.3	-0.28	0.213605	0.413421	0.368354	1	0.996511	0.859245
Anks1	A0A3B2WAQ7	0.9	0.74	1.03	0.72	1.36	0.47	0.62	0.39	0.35	0.86	0.86	0.84	0.18	0.73	0.49	0.97	-0.1375	-0.12	-0.255	0.580699	0.546969	0.282953	1	0.996511	0.822595
Anks1b	A0A0R4J2A2	0.2	0.47	0.9	-0.16	0.98	0.61	-0.5	-0.45	0.77	0.65	0.59	0.24	1.09	1.78	0.58	1.47	-0.1925	0.21	0.8775	0.640709	0.440565	0.0285482	1	0.996511	0.637553
Anks1b	A0A0R4J2A6	2.08	1.56	2.49	1.13	2.07	2.27	2.92	2.75	-3.66	-2.96	3.18	2.2	-2.31	-4.08	2.71	2.19	0.6875	-2.125	-2.1875	0.0732377	0.202923	0.17192	1	0.996511	0.76392
Anks1b	S4R286	0.78	0.72	0.81	1.01	0.97	0.99	0.98	0.87	0.8	0.25	1.07	0.78	0.36	0.39	0.75	0.75	0.1225	-0.105	-0.2675	0.416777	0.6353	0.19583	1	0.996511	0.78004
Anks1b	S4R1Q0	1.02	0.79	2.17	1.89	1.1	0.93	2.03	2.02	0.9	1.92	2.19	1.01	0.57	1.25	1.35	1.24	0.0525	0.0375	-0.365	0.899676	0.9317	0.338315	1	0.996755	0.847578
Anks1b	S4R2Q2	2.96	1.81	3.12	3.87	1.46	2.94	1.91	4.32	3.02	4.61	3.45	2.93	3.08	2.61	3.08	3.35	-0.2825	0.5625	0.09	0.684632	0.306098	0.83453	1	0.996511	0.975487
Anks3	A0A2R8VHN6	-0.32	-0.11	0.17	-0.61	-0.97	-1.49	-1.43	-0.69	0.53	0.81	-0.25	-0.86	2.92	-0.45	0.82	-0.96	-0.9275	0.275	0.8	0.00614341	0.493528	0.32772	1	0.996511	0.844684
Ankzf1	J3QM81	-0.58	-0.61	-4.11	-4.99	-0.52	-1.3	-4.07	-3.17	0.04	-1.9	-5.2	-0.94	-0.18	0.62	-6.79	-4.78	0.3075	0.5725	-0.21	0.808345	0.693858	0.911329	1	0.996511	0.986458
Anln	Q8K298	1.39	1.27	1.23	0.75	1.37	0.85	-0.3	0.71	0.96	0.47	0.72	0.82	0.28	0.56	0.92	0.99	-0.5025	-0.4175	-0.4725	0.187567	0.0790575	0.0864729	1	0.996511	0.691619
Ano10	Q8BH79-2	0.37	0.24	0.57	0.61	0.91	0.27	0.63	0.63	-0.02	0.76	0.42	0.41	-0.16	0.47	0.98	0.81	0.1625	-0.055	0.0775	0.411394	0.802276	0.785877	1	0.996511	0.967642
Ano3	A2AHL1	0.38	0.98	0.91	0.52	0.67	0.08	1.28	0.59	0.48	-0.36	0.82	0.12	0.1	0.96	0.79	1.07	-0.0425	-0.4325	0.0325	0.882313	0.172351	0.908222	1	0.996511	0.986458
Ano6	A0A2I3BPX3	1.54	1.12	0.79	1.32	1.01	0.92	1.14	1.18	0.81	0.79	0.94	1.31	-0.19	0.73	0.71	0.62	-0.13	-0.23	-0.725	0.524936	0.33411	0.0313871	1	0.996511	0.641974
Ano8	A0A1L1SR96	-0.03	0.19	0.41	0.22	0.08	0.34	0.3	0.38	0.16	0.4	0.23	-0.28	0.42	0.19	0.5	0.73	0.0775	-0.07	0.2625	0.645377	0.742189	0.22275	1	0.996511	0.787447
Anp32a	D3Z7M9	-1.78	-2.53	-2.59	-2.47	-1.98	-2.89	-2.47	-2.65	-2.81	-1.02	-2.47	-1.3	-2.69	-1.71	-2.72	-3	-0.155	0.4425	-0.1875	0.575826	0.337121	0.584547	1	0.996511	0.927734
Anp32b	Q9EST5	-1.84	-2.82	-4.65	-5.75	-3.13	-2.48	-5.35	-5.49	-2.19	-2.54	-4.77	-1.71	-2.55	-2.82	-5.91	-5.85	-0.3475	0.9625	-0.5175	0.740679	0.348593	0.651296	1	0.996511	0.947503
Anp32e	P97822-2	-4.26	-4.15	-5	-5.92	-3.99	-4.86	-5.86	-6.14	-4.71	-3.41	-5.5	-3.62	-4.64	-3.24	-6.35	-6.11	-0.38	0.5225	-0.2525	0.520255	0.382957	0.736926	1	0.996511	0.958635
Anpep	P97449	-1.16	-0.85	-0.93	-0.7	-0.76	-1.18	-0.79	-1.42	-0.84	-0.73	-0.84	-0.98	-0.84	-0.81	-0.87	-0.64	-0.1275	0.0625	0.12	0.553166	0.725711	0.528917	1	0.996511	0.908663
Antkmt	Q501J2	-0.04	0.76	0.11	0.13	0.48	-0.23	0.81	0.38	0.67	0.41	0.8	0.28	0.56	1.02	-0.14	0.31	0.12	0.3	0.1975	0.67257	0.233553	0.528795	1	0.996511	0.908663
Antxr1	Q9CZ52	0.39	0.45	0.92	1.47	0.16	0.83	0.8	0.69	0.21	-1.1	0.6	0.28	0.36	-0.68	0.69	1.28	-0.1875	-0.81	-0.395	0.529156	0.0857009	0.395115	1	0.996511	0.866783
Anxa1	P10107	-0.18	1.34	-0.7	0.23	-1.22	-0.47	-0.51	-1.07	-0.23	-0.39	-1.17	2.94	-0.21	3.87	-0.98	-0.73	-0.99	0.115	0.315	0.049064	0.898916	0.772458	1	0.996511	0.965933
Anxa11	P97384	0.3	0.81	0.54	0.11	1.33	0.18	0.34	0.1	-0.5	-0.35	0.26	0.14	-0.59	0.51	0.4	0.66	0.0475	-0.5525	-0.195	0.880679	0.0578898	0.553699	1	0.996511	0.916696
Anxa2	P07356	-0.06	-0.45	-0.94	0.27	-0.41	-0.05	-0.33	-0.81	-0.06	-0.62	-0.92	-0.47	0.03	-0.18	-1.02	-0.46	-0.105	-0.2225	-0.1125	0.728351	0.489213	0.744851	1	0.996511	0.959729
Anxa3	O35639	0.99	0.62	0.02	0.19	0.52	0.55	-0.2	-0.14	0.56	0.39	0.21	0.6	0.29	0.49	-0.13	-0.04	-0.2725	-0.015	-0.3025	0.371374	0.953343	0.299078	1	0.996755	0.828257
Anxa4	P97429	0.94	1.13	0.14	0.4	0.83	0.85	0.3	-0.13	0.46	-0.3	-0.4	0.67	0.25	0.44	-0.03	0.24	-0.19	-0.545	-0.4275	0.558531	0.143308	0.143845	1	0.996511	0.742777
Anxa5	P48036	0.27	0.33	0.5	0.42	0.77	0.06	0.42	0.29	-0.09	-0.12	0.31	0.22	-0.74	-0.17	-0.17	0.72	0.005	-0.3	-0.47	0.97935	0.128393	0.160087	1	0.996511	0.755194
Anxa6	F8WIT2	1.25	1.09	1.48	2.74	0.75	0.47	1.26	2.87	1.46	2.75	1.52	0.64	0.72	2.11	0.95	1.31	-0.3025	-0.0475	-0.3675	0.614976	0.928709	0.429022	1	0.996755	0.879165
Anxa6	P14824	0.73	0.6	1.14	1.21	0.92	0.81	1.16	1.35	0.79	1.06	1.28	0.99	0.36	0.54	1.11	1.13	0.14	0.11	-0.135	0.524987	0.61787	0.621526	1	0.996511	0.938628
Anxa7	Q07076	0.69	0.48	0.69	0.62	0.32	0.73	0.6	0.52	0.23	-0.18	0.52	0.38	0.69	-0.38	0.5	0.58	-0.0775	-0.3825	-0.2725	0.631939	0.089785	0.333343	1	0.996511	0.845601
Aoc3	O70423-2	-2.28	-1.35	-3.88	-3.27	-1.29	-2.3	-2.73	-3.6	-2.13	-3.86	-2.83	-2.14	-2.75	-1.8	-3.51	-3.09	0.215	-0.045	-0.0925	0.747721	0.943049	0.879166	1	0.996755	0.979626
Aox1	G3X8P9	-0.44	-0.75	-0.62	-0.38	-0.09	-0.65	-1.12	-0.58	-0.62	0.38	-0.9	-0.87	-1.15	-0.33	-0.2	-0.26	-0.0625	0.045	0.0625	0.796418	0.8861	0.813912	1	0.996511	0.972768
Ap1b1	Q5SVG5	-0.22	-0.22	0.32	0.35	-0.11	-0.33	0.52	0.49	-0.47	0.11	0.36	-0.39	-0.99	-0.03	0.04	-0.05	0.085	-0.155	-0.315	0.755645	0.570998	0.315776	1	0.996511	0.838085
Ap1g1	Q8CBB7	-0.19	-0.5	0.34	0.39	-0.19	-0.15	0.51	0.49	-0.62	0.31	0.46	-0.3	-1.01	-0.38	-0.07	0.15	0.155	-0.0475	-0.3375	0.595405	0.885689	0.326068	1	0.996511	0.843537
Ap1m1	P35585	-0.02	0.24	-0.24	-0.18	0.54	-0.16	0.12	0.07	-0.25	-0.48	-0.03	-0.01	-0.51	0.32	-0.44	-0.28	0.1925	-0.1425	-0.1775	0.369875	0.486787	0.485002	1	0.996511	0.894618
Ap1s1	P61967	0.62	-0.31	-0.76	-0.97	-0.12	0.53	-0.62	-0.97	0.33	-0.6	-0.68	0.28	-0.51	0.55	-1.4	-1.02	0.06	0.1875	-0.24	0.893238	0.659467	0.641355	1	0.996511	0.943421
Ap1s2	Q9DB50	-0.31	-0.48	0.12	0.43	0.2	-0.54	0.53	0.24	-0.25	0.83	0.35	-0.65	-0.67	0.66	-0.18	0.58	0.1675	0.13	0.1575	0.585136	0.728458	0.672899	1	0.996511	0.952944
Ap2a1	P17426-2	1.29	0.26	0.83	0.88	0.57	1.33	1.47	1.01	-0.06	0.68	0.91	0.65	-0.28	0.45	0.71	0.92	0.28	-0.27	-0.365	0.349427	0.384321	0.296194	1	0.996511	0.825612
Ap2a2	P17427	1.66	0.15	0.44	0.32	0.42	1.93	0.66	0.44	-0.16	-0.19	0.34	1.42	-0.76	-0.11	-0.12	0.01	0.22	-0.29	-0.8875	0.636418	0.547075	0.0403151	1	0.996511	0.658454
Ap2b1	Q9DBG3	1.08	0.37	0.37	0.46	0.51	1.42	1.25	0.69	0.51	0.06	0.48	0.8	-0.09	0.45	0.18	0.33	0.3975	-0.1075	-0.3525	0.180817	0.670901	0.17315	1	0.996511	0.764376
Ap2m1	A0A338P6T4	-2.52	-0.58	-3.54	-4.76	0.86	-1.12	-2.64	-4.13	-1.31	-4	-3.32	-2.08	-1.15	-0.89	-4.33	-2.77	1.0925	0.1725	0.565	0.389157	0.857889	0.59833	1	0.996511	0.930093
Ap2m1	P84091	-0.04	0	-0.05	-0.07	0.21	0.38	0.15	0.14	0.12	-0.66	0.11	-0.23	-0.14	0.18	0.36	-0.24	0.26	-0.125	0.08	0.0986697	0.575483	0.695584	1	0.996511	0.955729
Ap2s1	P62743	1.02	1.02	1.57	1.16	1.47	1.05	1.92	1.71	-1.48	-2.06	1.67	0.79	-1.96	-1.72	1.05	1.59	0.345	-1.4625	-1.4525	0.179202	0.10054	0.109816	1	0.996511	0.709835
Ap3b1	Q9Z1T1	-0.62	-0.53	0.18	0.14	-0.91	-0.63	0.07	-0.05	-0.31	0.13	0.2	-0.56	-0.43	-0.14	-0.44	-0.45	-0.1725	0.0725	-0.1575	0.582579	0.802078	0.543596	1	0.996511	0.912212
Ap3b2	Q9JME5	0.79	0.68	0.96	1.02	0.7	0.85	0.64	0.88	0.9	1.28	0.96	0.84	0.4	1.12	0.66	0.63	-0.095	0.1325	-0.16	0.556222	0.48261	0.474743	1	0.996511	0.891741
Ap3d1	O54774	0.02	0.3	0.69	0.26	0.54	0.19	0.58	0.42	-0.67	-0.53	0.62	0.08	-0.57	-0.85	0.46	0.52	0.115	-0.4425	-0.4275	0.565366	0.198782	0.266509	1	0.996511	0.818107
Ap3m1	Q9JKC8	0.45	0.29	0.01	-0.03	0.57	0.09	0.15	-0.04	0.13	-0.12	0.1	0.74	-0.72	0.19	-0.38	-0.26	0.0125	0.0325	-0.4725	0.951381	0.89369	0.0886834	1	0.996511	0.691619
Ap3m2	Q8R2R9	-0.3	-0.06	-0.06	-0.18	0.32	-0.02	-0.05	-0.04	-0.34	-0.36	0	-0.29	-0.51	0.21	-0.27	-0.14	0.2025	-0.0975	-0.0275	0.238416	0.579183	0.898261	1	0.996511	0.983509
Ap3s1	Q9DCR2	0.3	0.07	0.27	0.37	0.23	0.14	0.42	0.51	-0.52	0.27	0.55	0.44	-0.6	-0.66	-0.05	0.14	0.0725	-0.0675	-0.545	0.660945	0.800634	0.0500911	1	0.996511	0.658454
Ap3s2	Q8BSZ2	-0.16	-0.09	-0.29	-0.05	0.15	-0.09	-0.41	0.09	-0.24	-0.84	-0.14	-0.05	-0.7	-0.3	-0.42	-0.21	0.0825	-0.17	-0.26	0.650173	0.452013	0.200814	1	0.996511	0.780477
Ap4b1	A0A0G2JFY6	-0.88	-0.66	-0.08	0.13	0	-1.66	-0.6	-0.51	-0.24	-0.27	-0.68	-1.04	-1.54	0.28	-0.28	-0.19	-0.32	-0.185	-0.06	0.430369	0.551888	0.889846	1	0.996511	0.98149
Ap4e1	Q80V94	-0.25	0.11	-0.5	-0.4	0.45	-0.24	-0.33	-0.44	-0.11	-0.48	-0.53	-0.28	-0.17	0.37	-0.95	-0.62	0.12	-0.09	-0.0825	0.636688	0.667764	0.79787	1	0.996511	0.969727
Ap4m1	Q9JKC7	-0.45	-0.33	0.02	0.85	-0.22	-0.13	0.46	0.26	0.98	0.38	0.19	-0.27	0.85	-0.34	0.19	0.03	0.07	0.2975	0.16	0.829985	0.439272	0.671461	1	0.996511	0.952631
Ap4s1	Q9WVL1	1.63	1.15	1.02	1.36	0.95	1.04	0.21	0.74	1.4	0.75	1.33	1.71	1.78	0.47	1.02	0.94	-0.555	0.0075	-0.2375	0.0457115	0.976956	0.453248	1	0.997808	0.885993
Ap5s1	A2ANC4	-2.04	-2.91	-2.34	-2.8	-2.1	-2.1	-1.23	-2.48	-3.99	-2.49	-3.72	-6.21	-4.1	-2.69	-3.01	-1.64	0.545	-1.58	-0.3375	0.121285	0.0546166	0.511607	1	0.996511	0.903991
Ap5z1	Q3U829	-1.37	-0.57	-0.48	-0.61	-1.63	-0.4	-0.12	-0.54	0.5	-0.23	-0.43	-0.82	-1.2	-1.26	-0.8	-0.67	0.085	0.5125	-0.225	0.819023	0.158128	0.422248	1	0.996511	0.875782
Apaf1	G3XA09	-0.69	-0.43	-1.09	-0.7	-0.77	-0.4	-2.28	-0.79	-1.1	0.78	-1.11	0.47	-0.36	0.79	1.19	-0.32	-0.3325	0.4875	1.0525	0.428291	0.330587	0.0259826	1	0.996511	0.633075
Apba1	B2RUJ5	0.13	0.59	0.43	0.38	0.59	0.12	0.14	0.27	0.9	0.98	0.6	0.71	0.67	1.21	0.29	0.27	-0.1025	0.415	0.2275	0.584339	0.0514274	0.402763	1	0.996511	0.870698
Apba2	P98084	-0.21	-0.02	0.22	0.44	-0.77	0.11	0.54	0.25	0.58	0.44	0.35	0.6	1.02	0.12	0.35	0.38	-0.075	0.385	0.36	0.809351	0.0836669	0.198695	1	0.996511	0.78004
Apba3	O88888	0.32	0.54	-0.04	0.42	0.75	-0.1	-0.08	-0.71	0.39	1.34	0.21	0.2	0.14	1.02	0.03	-0.05	-0.345	0.225	-0.025	0.294838	0.46643	0.932013	1	0.996511	0.989713
Apbb1	Q9QXJ1	0.1	0.62	0.25	0.55	0.7	0.48	0.76	0.58	0.57	-0.07	0.61	0.42	0.38	1.45	0.37	0.34	0.25	0.0025	0.255	0.193028	0.991346	0.417853	1	0.999285	0.87558
Apbb1ip	Q8R5A3	-0.74	-1.49	-0.53	-0.66	-0.34	-0.98	-0.57	-0.41	0.05	1.47	-0.28	-1.02	1.63	-0.7	-0.97	-0.63	0.28	0.91	0.6875	0.308743	0.109853	0.261519	1	0.996511	0.81412
Apbb2	E9PWH3	0.58	0.69	1.28	1.24	0.41	0.89	0.79	1.87	0.69	1.17	1.18	0.64	0.79	0.63	1.78	1.99	0.0425	-0.0275	0.35	0.90246	0.914201	0.367563	1	0.996755	0.859245
Apc	B2RUG9	0.39	0.62	0.69	0.53	0.27	0.47	0.27	0.73	0.9	0.76	0.85	0.84	1.06	0.25	0.88	0.44	-0.1225	0.28	0.1	0.491049	0.111393	0.676536	1	0.996511	0.953006
Apc2	G5E832	0.21	0.32	0.89	0.74	0.34	0.29	0.41	0.55	1.47	1.09	0.71	0.46	1.69	1.05	1.13	0.93	-0.1425	0.3925	0.66	0.490646	0.192663	0.0310618	1	0.996511	0.641481
Apeh	A0A0R4J107	-0.41	-0.91	-0.32	0.26	-0.76	-0.18	-0.24	-0.07	0.03	0.03	-0.11	-0.37	0.04	0.09	-0.24	-0.22	0.0325	0.24	0.2625	0.909445	0.389283	0.355305	1	0.996511	0.855029
Apex1	P28352	-5.42	-5.88	-5.06	-4.64	-5.28	-5.66	-4.49	-5.03	-5.3	-3.06	-4.59	-5.08	-4.56	-4.06	-5.2	-5.35	0.135	0.7425	0.4575	0.698159	0.183503	0.255715	1	0.996511	0.809552
Aph1b	F8WHK7	0.45	0.04	1.05	1.73	0.62	0.12	0.43	1.22	0.95	1.9	0.83	0.16	0.31	1.55	0.55	0.24	-0.22	0.1425	-0.155	0.593725	0.766833	0.731591	1	0.996511	0.958635
Api5	O35841	-1.44	-2.65	-2.43	-2.33	-2.29	-2.19	-2.7	-2.41	-2.12	-1.2	-2.33	-2.15	-2.36	-1.9	-2.64	-2.53	-0.185	0.2625	-0.145	0.526545	0.471373	0.651044	1	0.996511	0.947407
Apip	Q9WVQ5	-1.43	-1.59	-1.31	-1.42	-1.53	-1.38	-0.84	-1.34	-1.98	-1.27	-1.2	-1.06	-1.72	-2.01	-1.75	-1.14	0.165	0.06	-0.2175	0.409363	0.803318	0.365626	1	0.996511	0.858622
Aplf	Q9D842-2	-2.89	-3.61	-1.94	-2.23	-5.36	-2.95	-3.76	-2.46	-2.74	2.39	-4.05	-1.61	-1.46	-5.08	-1.65	-2.33	-0.965	1.165	0.0375	0.17366	0.377058	0.963705	1	0.996511	0.9927
Aplp1	Q03157	-0.36	-0.44	-1.11	-1.63	-0.37	-0.57	-1.05	-1.23	0.17	-0.75	-1.09	-0.46	0.56	-0.26	-0.15	-1.2	0.08	0.3525	0.6225	0.818076	0.3733	0.185691	1	0.996511	0.776843
Aplp2	Q60709	-0.11	0.11	-0.37	-0.35	0.23	-0.01	-0.09	-0.43	-0.7	-0.59	-0.12	0.15	-0.68	-0.38	-0.4	-0.47	0.105	-0.135	-0.3025	0.614321	0.595095	0.155522	1	0.996511	0.750763
Aplp2	Q06335	0.86	1.78	-0.76	0.35	2.42	0.73	0.05	0.73	0	0.63	0.81	0.51	0.52	0.95	0.66	1.1	0.425	-0.07	0.25	0.52727	0.892191	0.624899	1	0.996511	0.939167
Apmap	Q9D7N9	0.23	0.38	0.42	0.4	0.78	0.32	0.78	0.43	0.37	0.08	0.2	0.18	0.44	0.56	0.66	0.71	0.22	-0.15	0.235	0.230619	0.369651	0.201385	1	0.996511	0.781032
Apoa1	Q00623	-4.79	-5.82	-3.91	-4.62	-4.94	-5.02	-4.22	-4.35	-5.46	-2	-3.86	-4.56	-4.32	-3.14	-4.42	-4.67	0.1525	0.815	0.6475	0.714889	0.296884	0.206497	1	0.996511	0.785338
Apoa2	P09813	-4.1	-4.13	-1.2	-3.57	-5.21	-3.09	-4.68	-3.74	-3.87	-0.64	-1.62	-3.68	-0.93	-4.05	-2.67	-1.27	-0.93	0.7975	1.02	0.241576	0.409604	0.272266	1	0.996511	0.822084
Apoa4	P06728	-5.57	-6.36	-4.55	-4.7	-5.57	-6.04	-4.77	-5.33	-5.86	-2.36	-4.51	-5.52	-4.59	-3.96	-5.29	-5.48	-0.1325	0.7325	0.465	0.774135	0.375955	0.371376	1	0.996511	0.859424
Apob	E9Q1Y3	-2.78	-4.55	-1.51	-2.03	-4.94	-4.35	-1.02	-2.26	-3.16	-1.49	-1.44	-3.09	-2.97	-2.52	-1.74	-2.23	-0.425	0.4225	0.3525	0.675832	0.572999	0.590222	1	0.996511	0.929142
Apoc1	P34928	-4.22	-4.01	-2.41	-2.69	-4.65	-4.37	-4.55	-3.11	-5.49	-2.53	-2.57	-3.24	-3.41	-4.41	-3.12	-4.15	-0.8375	-0.125	-0.44	0.143243	0.868508	0.399186	1	0.996511	0.868093
Apoc3	E9QP56	-1.28	-1.26	-2.82	-2.79	-0.99	-1.57	-3.65	-2.94	-0.58	-1.94	-2.57	-1.67	-0.37	-1.41	-3.56	-3.92	-0.25	0.3475	-0.2775	0.715727	0.539082	0.748495	1	0.996511	0.960744
Apod	P51910	-0.3	-0.67	-0.79	-1.17	0.06	-1.35	0	-0.94	-0.55	-0.3	-0.78	-0.63	-0.46	0.44	-0.91	-1.03	0.175	0.1675	0.2425	0.641709	0.48286	0.518202	1	0.996511	0.90668
Apoe	P08226	-1.07	-1.45	-1.21	-1.42	-1.1	-1.25	-1.11	-1.37	-1.09	-1.26	-1.22	-0.55	-0.94	-1.01	-1.19	-1.47	0.08	0.2575	0.135	0.63302	0.266624	0.521945	1	0.996511	0.907667
Apoh	Q01339	-2.78	-3.46	-2.27	-2.11	-3.02	-2.69	-2.68	-1.93	-2.76	-0.75	-2.53	-2.83	-2.2	-1.99	-2.08	-2.43	0.075	0.4375	0.48	0.837015	0.423292	0.163588	1	0.996511	0.758352
Apoo	Q9DCZ4-2	2.1	2.34	0.62	0.9	2.04	2.13	0.92	0.76	1.62	0.5	0.73	1.87	1.96	1.83	0.39	0.69	-0.0275	-0.31	-0.2725	0.957426	0.54317	0.616177	1	0.996511	0.93691
Apool	Q78IK4	-0.16	-0.17	-0.51	-0.61	-0.38	-0.07	-0.32	-0.63	-0.49	-0.89	-0.2	-0.12	-0.08	-0.37	-0.49	-0.17	0.0125	-0.0625	0.085	0.9495	0.792873	0.684568	1	0.996511	0.955729
App	P12023-2	-2.3	-3.18	0.62	0.53	-1	-3.2	0.87	0.98	-2.42	1.99	0.37	-3.44	-0.7	0.16	2.72	0.44	0.495	0.2075	1.7375	0.690251	0.883381	0.136503	1	0.996511	0.732247
App	A0A2I3BQZ9	-1.02	-0.91	-0.74	-0.71	-0.74	-1.2	-0.62	-0.86	-1.01	-0.68	-0.85	-0.77	-0.89	-0.7	-0.46	-0.77	-0.01	0.0175	0.14	0.957072	0.91987	0.472322	1	0.996755	0.891144
Appbp2	Q9DAX9	-0.21	-0.37	-1.23	-1.83	0.61	-0.43	-1.31	-0.96	0.49	-0.39	-1.09	-0.14	0.05	-0.35	-0.72	-1.11	0.3875	0.6275	0.3775	0.463457	0.204028	0.392566	1	0.996511	0.865775
Appl1	Q8K3H0	0.03	-0.21	0.06	0.07	-0.23	-0.01	-0.09	0.34	-0.03	0.27	0.24	-0.17	-0.15	-0.01	-0.16	0.02	0.015	0.09	-0.0625	0.934275	0.630786	0.725058	1	0.996511	0.958398
Appl2	Q8K3G9	0.94	0.89	0.95	1	0.95	0.71	0.75	0.94	0.14	0.33	0.69	0.71	-0.12	0.26	0.46	0.98	-0.1075	-0.4775	-0.55	0.471733	0.0347336	0.0591516	1	0.996511	0.661738
Aprt	P08030	-1.12	-0.59	-0.59	-0.57	-0.62	-0.89	-0.89	-0.8	-0.23	-0.05	-0.65	-0.84	-0.12	0.08	-0.78	-0.92	-0.0825	0.275	0.2825	0.662855	0.288378	0.350052	1	0.996511	0.85327
Aptx	Q7TQC5-4	-2.52	-2.1	-2.87	-3	-1.53	-2.14	-2.79	-2.4	-2.14	-1.29	-1.99	-1.21	-1.47	-0.81	-2.58	-2.67	0.4075	0.965	0.74	0.230291	0.0128283	0.137348	1	0.996511	0.732462
Aqp1	Q02013	-1.47	-1.15	-0.31	-0.07	0.1	-1.06	-0.67	-0.14	-0.41	-0.1	-0.76	-1.4	0.1	-0.28	-0.16	-0.1	0.3075	0.0825	0.64	0.449497	0.841891	0.0889376	1	0.996511	0.691619
Aqp11	A0A0X1KG63	0.59	0.38	0.64	-0.9	0.32	0.65	-0.45	-1.28	0.88	1.27	-0.15	-0.59	2.22	-0.47	-0.52	0.12	-0.3675	0.175	0.16	0.484777	0.739177	0.812065	1	0.996511	0.972642
Aqp4	A0A5F8MQ17	-0.66	1.89	1.44	1.64	0.96	1.12	0.87	1.46	0.75	1.88	0.98	0.83	1.33	2.14	1.97	2.72	0.025	0.0325	0.9625	0.963737	0.955965	0.134366	1	0.996755	0.731111
Aqp4	A0A0R4J0Z3	0.13	0.6	-0.03	0.24	0.5	0.04	-0.14	-0.02	0.47	0.45	0.46	0.57	-0.68	0.74	-0.14	-0.4	-0.14	0.2525	-0.355	0.525765	0.21106	0.307061	1	0.996511	0.832533
Aqr	Q8CFQ3	-0.2	-0.93	-0.98	-0.92	-1.37	-0.81	-0.92	-0.79	-1.13	-0.41	-1.03	-1.18	-0.45	-0.79	-0.43	-0.82	-0.215	-0.18	0.135	0.389971	0.514586	0.59012	1	0.996511	0.929142
Araf	P04627	-0.73	-1.02	-1.38	-0.81	-0.36	-0.48	-0.94	-1.1	-0.68	0.96	-1.1	-0.48	0.16	-0.11	-0.84	-1.57	0.265	0.66	0.395	0.294	0.162306	0.337556	1	0.996511	0.847578
Araf	Q8CAD1	-0.52	-0.42	-0.75	-0.41	0.41	0.29	0.33	0.67	1.46	-0.29	-0.12	-0.22	0.05	-0.32	-0.61	-0.9	0.95	0.7325	0.08	0.000384477	0.0994562	0.750537	0.544245	0.996511	0.961479
Arap1	Q4LDD4-2	0.39	0.25	0.19	0.19	0.21	0.13	-0.23	0.16	0.35	0.04	0.15	0.2	0.27	-0.19	0.27	0.36	-0.1875	-0.07	-0.0775	0.278711	0.673094	0.699391	1	0.996511	0.955729
Arap2	E9QP44	0.34	0.44	0.64	0.45	0.65	0.63	0.71	0.99	0.44	0.47	1.17	0.46	0.33	0.79	0.38	0.89	0.2775	0.1675	0.13	0.11686	0.462376	0.543911	1	0.996511	0.912212
Arc	Q9WV31	0.42	0.97	1.23	1.15	1.14	0.44	0.75	0.93	0.16	0.73	0.93	0.26	-0.2	0.76	0.83	0.62	-0.1275	-0.4225	-0.44	0.609663	0.149265	0.179841	1	0.996511	0.775542
Arcn1	Q5XJY5	-0.98	-1.19	-1.51	-1.6	-0.78	-1.31	-1.55	-1.87	-1.15	-1.12	-1.45	-0.83	-0.89	-0.77	-1.34	-1.43	-0.0575	0.1825	0.2125	0.834574	0.427741	0.406417	1	0.996511	0.87356
Arel1	Q8CHG5	-0.13	-0.02	0.41	-0.05	0.01	-0.37	0.46	0.19	-0.12	-0.22	0.08	-0.37	-0.51	-0.5	0.26	0.76	0.02	-0.21	-0.05	0.931005	0.313855	0.881325	1	0.996511	0.979767
Arf1	P84078	-0.6	-0.39	-0.57	-0.67	-0.23	-0.62	-0.23	-0.79	-0.58	-1.24	-0.51	-0.61	-1.21	0.17	-1.34	-1.05	0.09	-0.1775	-0.3	0.640118	0.424882	0.401817	1	0.996511	0.870698
Arf2	Q8BSL7	-1.55	-0.36	-0.47	-0.98	0.07	-1.33	-0.71	-1.49	-0.35	-1.47	-1.04	-1.69	-2.12	-0.76	-2.64	-1.31	-0.025	-0.2975	-0.8675	0.952382	0.449166	0.0917032	1	0.996511	0.693639
Arf4	P61750	0.03	0.38	1.22	1.11	0.43	0.15	1.19	0.94	0.13	1.43	1.33	0.41	-0.38	0.65	1.04	1.25	-0.0075	0.14	-0.045	0.983198	0.735468	0.918184	1	0.996511	0.986868
Arf5	P84084	-0.43	-0.75	0.19	0.42	-0.63	-0.16	0	0.51	0.06	0.4	0.43	0.07	-1.16	0.02	-0.31	-0.21	0.0725	0.3825	-0.2725	0.833808	0.218397	0.464867	1	0.996511	0.888267
Arf6	P62331	0.23	0.35	0.1	0.46	0.11	0.3	0.34	0.41	0.41	-0.08	0.39	-0.2	-0.09	0.77	-0.3	0.03	0.005	-0.155	-0.1825	0.975277	0.478861	0.504589	1	0.996511	0.901002
Arfgap1	V9GXM1	0.33	0.8	0.86	1.06	0.87	0.3	0.94	0.92	-0.01	0.37	1	0.31	0.01	0.44	0.79	0.59	-0.005	-0.345	-0.305	0.983011	0.23155	0.254295	1	0.996511	0.809524
Arfgap2	Q99K28	-1.03	-0.89	-0.43	-0.71	-1	-1.15	-0.63	-0.68	-1.61	-1.04	-0.44	-0.76	-1.02	-1.2	-0.37	-0.5	-0.1	-0.1975	-0.0075	0.634194	0.500442	0.9774	1	0.996511	0.993727
Arfgap3	A0A0R4J0T8	0.03	0.11	0.35	0.36	-0.08	0.05	-0.65	0.01	-0.11	0.14	0.27	0.24	0.71	-0.41	-0.12	-0.53	-0.38	-0.0775	-0.3	0.0993803	0.673957	0.336867	1	0.996511	0.847578
Arfgef1	G3X9K3	-0.34	-0.37	-0.48	-0.37	-0.35	-0.31	-0.48	-0.55	-0.18	-0.04	-0.35	-0.06	-0.41	0	-0.73	-0.61	-0.0325	0.2325	-0.0475	0.824041	0.181566	0.826406	1	0.996511	0.973235
Arfgef2	A2A5R2	0.88	0.37	0.63	0.51	0.19	0.99	0.3	0.4	0.55	0.23	0.71	0.74	0.73	-0.12	0.48	0.52	-0.1275	-0.04	-0.195	0.5805	0.845488	0.438682	1	0.996511	0.883205
Arfgef3	Q3UGY8	-0.31	-0.31	0.01	-0.06	-0.23	-0.41	-0.09	-0.2	-0.57	-0.1	0.01	-0.44	-0.62	-0.32	-0.35	-0.29	-0.065	-0.1075	-0.2275	0.693924	0.604725	0.251094	1	0.996511	0.807507
Arfip1	G5E8V9-2	-0.12	0.11	-0.15	0	0.31	-0.21	-0.09	-0.03	-0.01	0.36	-0.15	-0.05	-0.14	0.84	-0.28	-0.32	0.035	0.0775	0.065	0.841626	0.679104	0.825965	1	0.996511	0.973155
Arfip2	A0A1B0GS63	-0.51	-0.11	-0.25	-0.11	-0.59	-0.68	-0.15	-0.18	0.2	0.36	-0.35	-0.45	0.37	0.04	-0.38	-0.83	-0.155	0.185	0.045	0.445535	0.459636	0.877672	1	0.996511	0.979626
Arfrp1	Q8BXL7	-0.98	-1.05	-1.09	-1.18	-0.09	-0.87	-0.71	-1.27	-0.93	-1.36	-1.63	-0.82	-1.84	-0.34	-1.55	-0.87	0.34	-0.11	-0.075	0.210392	0.630011	0.825865	1	0.996511	0.973155
Arg2	O08691	0.3	0.7	-0.1	0.47	0.31	0.49	0.75	0.53	0.92	0.7	0.1	0.59	0.39	0.76	-0.26	0.15	0.1775	0.235	-0.0825	0.421513	0.379163	0.775927	1	0.996511	0.966799
Arglu1	Q3UL36	0.51	-1.08	-0.33	-0.79	-0.18	-0.24	-1.73	0.08	0.26	-0.21	-0.91	-0.95	1.4	-0.13	0.7	-0.83	-0.095	-0.03	0.7075	0.8481	0.944222	0.22085	1	0.996755	0.787447
Arhgap1	A2AH25	1.69	0.68	0.78	0.42	0.61	1.75	0.57	0.75	-0.31	0.34	0.87	1.83	-0.14	-0.36	0.58	0.55	0.0275	-0.21	-0.735	0.941327	0.671949	0.0676699	1	0.996511	0.664936
Arhgap1	Q5FWK3	0.47	0.83	0.82	0.8	0.68	-0.03	0.94	1.16	1.43	1.19	1.09	0.82	0.67	1.43	0.25	0.25	-0.0425	0.4025	-0.08	0.877859	0.0726237	0.79224	1	0.996511	0.96933
Arhgap10	Q6Y5D8-3	0.44	0.46	-0.2	-0.61	0.01	-0.2	-1.1	-1.28	0.33	-0.22	-1.52	0.24	0.93	-1.82	-0.37	-0.08	-0.665	-0.315	-0.3575	0.116849	0.506595	0.538401	1	0.996511	0.912212
Arhgap12	B2RUJ8	-0.1	0.03	0.39	0.07	0.56	0.07	0.52	0.33	-0.28	-0.52	0.31	-0.23	-0.18	-1.1	0.44	0.33	0.2725	-0.2775	-0.225	0.178154	0.255091	0.537588	1	0.996511	0.912212
Arhgap17	Q3UIA2-2	0.05	-0.61	-0.21	0.23	-0.76	-0.13	-0.75	-0.28	1.19	0.12	-0.29	0.22	1.46	-0.78	-0.54	-0.3	-0.345	0.445	0.095	0.198405	0.230486	0.850511	1	0.996511	0.976225
Arhgap18	Q8K0Q5	-0.9	-0.58	0.16	0.08	0.09	0.08	-0.38	0.37	-0.38	0.59	0.21	-0.16	-0.2	0.27	0.08	1.4	0.35	0.375	0.6975	0.260285	0.276069	0.121259	1	0.996511	0.721448
Arhgap20	Q6IFT4	0.27	-0.2	0.04	0.18	-0.44	0.78	-0.09	-0.24	1.38	-0.17	-0.14	0.17	2.78	0.65	-0.11	-0.21	-0.07	0.2375	0.705	0.808386	0.523337	0.287965	1	0.996511	0.824705
Arhgap21	B7ZCJ1	1.1	1	1.25	1.04	0.95	1.19	0.93	1	0.75	1.31	1.24	1.13	0.64	0.93	1.25	1.17	-0.08	0.01	-0.1	0.602746	0.958399	0.632533	1	0.996755	0.941132
Arhgap23	B1AQY2	0.1	0.42	0.34	0.18	0.27	0.09	0.16	0.26	0.31	0.17	0.47	0.37	0.35	0.46	0.43	0.29	-0.065	0.07	0.1225	0.674755	0.685066	0.496572	1	0.996511	0.897918
Arhgap25	Q8BYW1	-0.28	0.3	0.9	0.59	-0.08	-0.11	0.03	0.64	-0.11	0.28	0.54	0.04	-0.12	0.11	0.26	0.06	-0.2575	-0.19	-0.3	0.406159	0.525619	0.304216	1	0.996511	0.831662
Arhgap26	F6T836	0.96	0.9	0.57	0.33	0.96	0.92	0.54	0.35	0.29	0.46	0.4	1.16	-0.01	0.55	0.2	0.33	0.0025	-0.1125	-0.4225	0.991279	0.671599	0.0958282	1	0.996511	0.698156
Arhgap27	A2AB59	-0.22	-0.39	-0.66	-0.28	-0.69	-0.41	-0.77	-0.48	0.64	-0.05	-0.1	-0.89	0.69	-0.07	-0.18	-0.59	-0.2	0.2875	0.35	0.275978	0.389342	0.259197	1	0.996511	0.812074
Arhgap29	A0A0G2JEY0	0.87	1.37	0.87	1.2	1.69	0.53	1.34	0.85	1.11	1.32	0.57	0.79	0.2	2	0.19	0.31	0.025	-0.13	-0.4025	0.930486	0.586391	0.36854	1	0.996511	0.859245
Arhgap31	A6X8Z5	-1.14	-0.36	-0.38	-0.07	-0.24	-0.95	0.15	0.23	-1.19	-0.56	0.4	-1.09	-0.65	-0.1	-0.2	-0.05	0.285	-0.1225	0.2375	0.413517	0.765217	0.414358	1	0.996511	0.874945
Arhgap32	S4R2G6	0.13	0.13	0.45	1.14	0.36	0.66	0.32	0.64	0.4	2.58	0.31	0.46	1.74	0.54	1.16	0.94	0.0325	0.475	0.6325	0.90143	0.399396	0.0938198	1	0.996511	0.698156
Arhgap32	Q811P8	0.46	0.57	0.9	0.77	0.15	0.47	0.47	0.78	0.7	0.51	1.03	0.68	0.57	0.66	0.39	0.43	-0.2075	0.055	-0.1625	0.307671	0.781349	0.407221	1	0.996511	0.874084
Arhgap33	A0A140LHW2	0.27	0.49	0.03	0.52	0.06	0.65	0.57	0.57	1.62	0.82	0.66	0.64	1.85	0.8	0.52	0.36	0.135	0.6075	0.555	0.518641	0.0500247	0.140486	1	0.996511	0.737129
Arhgap35	Q91YM2	0.67	0.24	0.6	0.3	0.29	0.72	0.71	0.55	0.32	0.18	0.71	0.8	-0.08	0.24	0.36	0.48	0.115	0.05	-0.2025	0.543279	0.821001	0.35957	1	0.996511	0.856645
Arhgap39	P59281-2	-2.86	0.87	-2.47	-4.22	-4.62	-1.38	-6.64	-2.89	2.7	2.65	-5.42	-1.06	4.52	-2.75	-0.49	-1.06	-1.7125	1.8875	2.225	0.241282	0.350648	0.209389	1	0.996511	0.786218
Arhgap39	H7BX46	0.34	0.69	0.45	0.26	0.58	0.36	0.37	0.37	0.9	0.52	0.72	0.53	1.24	0.58	0.63	0.37	-0.015	0.2325	0.27	0.927519	0.23774	0.287832	1	0.996511	0.824705
Arhgap42	B2RQE8	-1.07	-1.48	0.26	-0.88	-2.58	-0.93	-1.56	-1.43	-0.87	-0.65	-0.98	-1.21	-0.17	-2.26	-0.85	-0.33	-0.8325	-0.135	-0.11	0.105256	0.721006	0.843405	1	0.996511	0.976225
Arhgap44	Q5SSM3	-0.38	-0.35	0.59	0.6	-0.42	-0.15	0.51	0.39	0.03	0.75	0.55	-0.38	0.18	0.21	0.32	0.36	-0.0325	0.1225	0.1525	0.92423	0.73859	0.608176	1	0.996511	0.93378
Arhgap5	E9PYT0	1.02	0.63	0.4	0.17	0.83	0.92	0.69	0.39	-0.25	0.14	0.5	1.15	-0.39	-0.36	0.13	0.22	0.1525	-0.17	-0.655	0.5185	0.622383	0.034559	1	0.996511	0.651434
Arhgap6	G3UZI7	-0.17	-0.57	-1.79	-1.77	-1.23	-1.05	-1.3	-1.03	-0.07	-1.75	-2.03	-0.34	0.68	-0.94	-1.63	-0.46	-0.0775	0.0275	0.4875	0.845205	0.962869	0.415526	1	0.996755	0.874945
Arhgdia	Q99PT1	1.17	0.94	0.84	0.87	0.85	0.89	0.61	0.76	1.07	0.96	0.6	0.91	0.6	1.93	0.57	0.2	-0.1775	-0.07	-0.13	0.284159	0.707585	0.731058	1	0.996511	0.958635
Arhgdib	Q61599	-0.84	-1.29	-0.47	0.19	-1.89	-1.59	-0.96	0.06	-1.33	1.13	-0.16	-1.31	-1.91	-0.77	-0.44	-0.36	-0.4925	0.185	-0.2675	0.331236	0.760899	0.555652	1	0.996511	0.917092
Arhgef1	E9PUF7	0.6	0.57	-0.09	0.05	0.43	0.47	-0.04	0.18	0.55	0.34	0.01	0.27	0.23	0.42	-0.31	0.14	-0.0225	0.01	-0.1625	0.922653	0.966415	0.540865	1	0.996755	0.912212
Arhgef10	Q8C033	-0.17	0.09	0.33	0.09	-0.54	-0.3	0.11	-0.36	0.77	-0.22	0.09	-0.28	1.12	-1.11	0.2	0.21	-0.3575	0.005	0.02	0.105503	0.985492	0.964118	1	0.998892	0.9927
Arhgef10l	A2AWP8-3	-0.04	0.05	0.02	0.04	-0.24	-0.06	-0.26	-0.22	0.13	-0.34	-0.1	0.04	0.14	-0.02	0.02	-0.22	-0.2125	-0.085	-0.0375	0.159788	0.630422	0.831275	1	0.996511	0.973982
Arhgef11	Q68FM7	0.53	0.43	1.35	1.05	0.59	0.48	0.99	1.35	0.71	0.57	1.37	0.61	0.32	0.55	0.77	1.18	0.0125	-0.025	-0.135	0.966049	0.932329	0.65243	1	0.996755	0.947633
Arhgef12	Q8R4H2	1.42	1.25	0.7	0.84	1.53	1.41	-0.2	0.66	2.3	-1.12	0.72	1.66	2.05	1.18	-0.56	-0.26	-0.2025	-0.1625	-0.45	0.622102	0.815049	0.449485	1	0.996511	0.884817
Arhgef12	F8VQN6	0.45	0.52	0.9	0.45	0.56	0.38	0.76	0.74	0.45	0.58	0.99	0.52	0.23	0.58	0.84	0.65	0.03	0.055	-0.005	0.869721	0.790857	0.981752	1	0.996511	0.994858
Arhgef17	Q80U35	0.17	0.4	0.74	0.46	0.37	0.24	0.18	0.53	-0.14	-0.48	0.68	0.26	0.14	-0.23	0.56	0.39	-0.1125	-0.3625	-0.2275	0.543964	0.227588	0.364062	1	0.996511	0.858475
Arhgef18	A0A5F8MPF6	0.14	0.36	0.38	0.48	0.18	0.05	0.29	0.59	0.32	0.61	0.28	0.41	0.15	0.59	-0.21	0.26	-0.0625	0.065	-0.1425	0.729793	0.71085	0.533942	1	0.996511	0.911825
Arhgef19	A2A832	-1.41	-1.89	-2.41	2.33	-3.71	-2.46	-1.9	-0.56	0.23	0.55	0	-1.42	-0.31	-1.75	-0.62	-2.18	-1.3125	0.685	-0.37	0.263836	0.516754	0.723399	1	0.996511	0.958398
Arhgef2	H3BJU7	-0.69	-0.44	-0.3	-0.59	-0.38	-0.9	-0.5	-0.48	-0.58	-0.24	-0.21	-0.21	-0.3	-0.4	-0.63	-0.46	-0.06	0.195	0.0575	0.746129	0.308735	0.761207	1	0.996511	0.963123
Arhgef25	A0A1W2P6R9	0.31	-0.13	0.48	0.6	-0.39	0.35	0.4	0.76	0.54	0.91	0.81	0.17	-0.54	0.81	0.05	0.08	-0.035	0.2925	-0.215	0.903793	0.265136	0.512769	1	0.996511	0.904116
Arhgef26	D3YYY8	-0.34	-0.03	0.12	0.23	-0.29	0.04	-0.11	-0.06	-0.15	0.41	-0.05	0.05	0.15	0.12	0.21	0.52	-0.1	0.07	0.255	0.590078	0.744488	0.247451	1	0.996511	0.803677
Arhgef28	A0A286YDI4	0.05	0.67	-0.13	-0.14	0.65	0.24	0.14	-0.23	0.33	0.7	-0.07	0.12	0.3	0.28	0.04	-0.08	0.0875	0.1575	0.0225	0.745592	0.561288	0.927457	1	0.996511	0.989331
Arhgef4	E9PYK8	-0.91	-0.71	-0.83	-1.12	-0.23	-0.83	-0.47	-0.93	-0.74	-0.39	-0.93	-0.38	-0.55	0.76	-1.54	-1.19	0.2775	0.2825	0.2625	0.211048	0.194178	0.588621	1	0.996511	0.929131
Arhgef40	Q3UPH7-3	-0.41	-0.04	0.32	0.3	0.32	-0.11	-0.2	0.42	0.01	0.03	0.1	-0.03	0.18	-0.48	0.11	0.38	0.065	-0.015	0.005	0.790828	0.944193	0.98548	1	0.996755	0.996154
Arhgef6	F6WMJ3	0.86	0.74	0.11	-0.16	0.62	0.64	0.07	-0.02	1.19	-0.66	-0.27	0.65	1.08	0.74	-0.08	-0.06	-0.06	-0.16	0.0325	0.841386	0.727867	0.930461	1	0.996511	0.989713
Arhgef7	Q9ES28	0.17	-0.03	0.94	0.85	-0.11	0.35	0.58	0.94	-0.04	0.63	0.98	0.24	-0.23	-0.2	0.31	0.31	-0.0425	-0.03	-0.435	0.894284	0.927016	0.170883	1	0.996755	0.762322
Arhgef7	Q9ES28-5	-3.69	-5.72	-3.2	-2.71	-5.37	-3.93	-5.54	-1.36	-2.96	1.07	-2.65	-3.67	-1.81	-3.96	-0.76	-3.91	-0.22	1.7775	1.22	0.834055	0.140008	0.210355	1	0.996511	0.786218
Arhgef9	B1AXI4	-0.03	-0.23	-0.09	0.08	0.55	0.91	0.48	0.5	1.09	0.62	0.69	0.49	0.79	0.76	0.34	0.58	0.6775	0.79	0.685	0.00340901	0.00307251	0.00629863	1	0.996511	0.552614
Arid1a	E9QAQ7	-2.43	-3.14	-2.8	-3.15	-3.57	-2.91	-3.31	-2.78	-0.39	-0.92	-2.48	-2.81	0.54	-2.45	-0.02	-3.3	-0.2625	1.23	1.5725	0.324805	0.0540612	0.0913775	1	0.996511	0.693316
Arid1b	E9Q6R4	-2.65	-3.08	-1.79	-1.79	-2.82	-3.07	-2.15	-2.16	-2.53	-0.85	-1.87	-2.73	-2.29	-1.61	-2.36	-2.05	-0.2225	0.3325	0.25	0.560403	0.507852	0.492751	1	0.996511	0.897531
Arid2	E9Q7E2	0.85	0.54	0.69	0.66	0.36	0.66	-0.02	0.02	1.47	0.24	0.33	0.61	1.87	1.28	0.91	0.7	-0.43	-0.0225	0.505	0.0599019	0.939155	0.10215	1	0.996755	0.700524
Arid4a	F8VPQ2	-1.79	-2.5	-1.23	-1.73	-2.86	-2.38	-1.19	-1.11	-2.77	-0.53	-2.82	-2.39	-1.52	-1.32	-0.76	-0.62	-0.0725	-0.315	0.7575	0.877641	0.573144	0.0495792	1	0.996511	0.658454
Arid4b	Z4YL44	-0.48	-7.99	-9.97	-6.55	-8.72	-2.15	-8.15	-9.4	-0.78	-3.58	-8.43	-3.59	0.67	-3.44	-3.23	-5.75	-0.8575	2.1525	3.31	0.716416	0.363284	0.151698	1	0.996511	0.750178
Arih1	Q9Z1K5	-0.65	-0.83	-0.28	-0.89	-0.87	-0.69	-0.94	-0.63	-1.29	-1.13	-0.4	-0.42	-1.35	-1.38	-0.34	-0.46	-0.12	-0.1475	-0.22	0.537981	0.603901	0.495731	1	0.996511	0.89758
Arih2	Q9Z1K6	-1.12	-1.25	-1.01	-0.64	-0.5	-0.95	-1.38	-1.17	-0.71	-0.03	-0.81	-0.76	-0.94	-0.62	-0.6	-0.86	0.005	0.4275	0.25	0.983621	0.113876	0.2589	1	0.996511	0.812074
Arl1	F8WIB1	-1.91	-1.41	-2.68	-2.57	-1.43	-1.76	-2.27	-2.94	-1.33	-2.37	-2.35	-1.66	-1.96	-0.99	-3.72	-2.96	0.0425	0.215	-0.265	0.918626	0.575154	0.664665	1	0.996511	0.949825
Arl10	Q9QXJ4	0.75	1.04	0.7	0.99	1.01	1.03	1.25	0.97	0.38	-0.35	1.35	0.61	0.43	0.73	1.5	1.58	0.195	-0.3725	0.19	0.25406	0.306715	0.540786	1	0.996511	0.912212
Arl13b	Q640N2	-2.02	-1.48	-0.64	-0.68	-0.83	-1.21	-0.84	-0.05	-0.49	0.96	-1.05	-2.03	-2.14	-1.16	-0.16	0.31	0.4725	0.5525	0.4175	0.246923	0.402885	0.483143	1	0.996511	0.893925
Arl15	Q8BGR6	1.09	0.89	0.49	0.6	1.32	1.25	0.39	0.19	0.21	0.33	0.02	0.85	-0.37	0.61	0.18	0.18	0.02	-0.415	-0.6175	0.949322	0.121864	0.0439429	1	0.996511	0.658454
Arl2	Q9D0J4	-0.19	0.27	-0.6	-0.34	0.53	-0.4	0.41	-0.38	-0.37	-0.95	-0.38	0	-0.57	0.29	-0.64	-0.07	0.255	-0.21	-0.0325	0.41353	0.460751	0.913371	1	0.996511	0.986458
Arl2bp	Q9D385	-1.66	-1.09	-1.1	-1.01	-1.5	-1.55	-0.49	-1.02	-1.82	-0.7	-1.31	-1.31	-1.86	-1.71	-1.41	-1.28	0.075	-0.07	-0.35	0.795841	0.805733	0.168996	1	0.996511	0.759484
Arl3	Q9WUL7	-1.9	-1.77	-1.97	-2.03	-1.55	-1.75	-1.39	-2	-1.36	-2.26	-2.1	-1.78	-1.37	-1.17	-2.18	-2.45	0.245	0.0425	0.125	0.207901	0.856925	0.697717	1	0.996511	0.955729
Arl4c	P61208	1.33	0.71	0.6	1.87	0.16	1.32	-0.24	1.35	2.07	3.15	0.55	2.18	0.9	1.29	-1.11	-0.91	-0.48	0.86	-1.085	0.317548	0.153732	0.108937	1	0.996511	0.707444
Arl5a	Q80ZU0	-1.09	-0.61	-0.21	-0.09	-0.22	-0.87	-0.2	-0.42	-0.99	-0.21	-0.2	-1.06	-1.41	-0.38	-0.72	-0.43	0.0725	-0.115	-0.235	0.7944	0.725256	0.483736	1	0.996511	0.894091
Arl6	O88848	-0.36	0.01	0.23	-0.59	0.27	-0.28	0.81	-0.04	-0.17	-1.29	0.08	-0.2	-0.53	0.52	0.12	0.29	0.3675	-0.2175	0.2775	0.236814	0.537705	0.371296	1	0.996511	0.859424
Arl6ip1	Q9JKW0	1.23	0.67	1.57	0.93	0.23	2.29	-0.12	0.66	0.55	2.09	0.94	0.94	1.77	0.39	1.36	0.92	-0.335	0.03	0.01	0.525598	0.93581	0.977266	1	0.996755	0.993727
Arl6ip4	Q9JM93	0.44	-0.18	0.17	0.34	-2.54	0.05	-1.37	0.15	1.24	0.61	0.12	-0.26	2.27	1.12	-0.81	-1.82	-1.12	0.235	-0.0025	0.0882355	0.502167	0.997621	1	0.996511	0.999705
Arl6ip5	Q8R5J9	1.03	1.27	1.42	1.18	1.22	0.88	1.73	1.76	-0.67	-0.95	1.37	0.93	-0.84	-0.28	1.28	1.45	0.1725	-1.055	-0.8225	0.483107	0.0767937	0.148223	1	0.996511	0.746406
Arl6ip6	Q8BH07	3.37	1.81	1.94	2.15	1.26	2.47	2.32	3.04	1.52	0.82	1.85	1.93	2.71	0.9	2.92	3.66	-0.045	-0.7875	0.23	0.924857	0.0861197	0.714575	1	0.996511	0.958106
Arl8a	Q8VEH3	-0.15	0.56	0.39	0.3	0.97	0.18	1.4	0.49	-0.05	-1.13	0.68	0.2	-0.33	0.32	0.58	1.03	0.485	-0.35	0.125	0.138368	0.386201	0.702806	1	0.996511	0.956859
Arl8b	Q9CQW2	0.97	0.49	0.24	0.37	1.19	0.82	0.85	0.38	1	-0.13	0.4	1.49	-0.09	0.6	-0.15	0.26	0.2925	0.1725	-0.3625	0.250769	0.646667	0.191948	1	0.996511	0.777117
Armc1	Q9D7A8	-0.08	-0.31	0.09	0.18	-0.57	-0.03	0.08	0.27	0.76	-0.27	0.14	-0.14	0.49	-0.15	-0.47	-0.5	-0.0325	0.1525	-0.1275	0.887357	0.574409	0.646012	1	0.996511	0.944749
Armc10	Q9D0L7	0.97	0.73	-0.05	0.26	0.64	1.23	-0.19	0.26	0.15	0.23	0.27	1.16	0.25	-0.54	-0.12	-0.27	0.0075	-0.025	-0.6475	0.983442	0.939234	0.0534527	1	0.996755	0.661738
Armc6	Q8BNU0	-0.11	-0.22	0.24	0.01	-0.44	-0.04	0.5	-0.04	0.28	0.59	0.3	0.33	-0.16	0.3	-0.07	0.56	0.015	0.395	0.1775	0.948924	0.0572852	0.458295	1	0.996511	0.887902
Armc8	Q9DBR3-2	1.39	0.95	0.14	0.45	0.89	1.64	-0.35	-0.15	0.26	1	-0.45	1.54	0.49	0.05	-0.22	-0.37	-0.225	-0.145	-0.745	0.6537	0.76304	0.050303	1	0.996511	0.658454
Armc8	G3X920	-0.43	-0.34	-0.58	-0.82	0.18	-0.36	-0.33	-0.62	-0.59	-0.18	-0.59	-0.24	-0.58	0.06	-0.9	-0.57	0.26	0.1425	0.045	0.258082	0.484954	0.861027	1	0.996511	0.977204
Armc9	Q9D2I5-2	-0.41	-0.2	-0.27	-0.09	0.17	-0.66	0.13	-0.23	-0.64	0.17	0.14	-0.02	-0.47	-0.42	0.05	-0.09	0.095	0.155	0.01	0.67504	0.509084	0.961108	1	0.996511	0.9927
Armcx2	Q6A058	-0.39	-0.17	-0.17	0.25	-0.35	-0.29	-0.42	-0.18	1.45	0.9	-0.2	0.04	2.38	-0.17	-0.11	-0.18	-0.19	0.6675	0.6	0.319347	0.114015	0.326813	1	0.996511	0.843799
Armcx3	Q8BHS6	-0.6	-0.65	-0.44	-0.84	-0.12	-0.62	-0.25	-0.51	-1.26	-0.97	-0.43	-0.71	-0.9	-0.81	-0.56	-0.75	0.2575	-0.21	-0.1225	0.185855	0.370269	0.521018	1	0.996511	0.907667
Armcx4	E9PWM3	1.29	1.36	-0.69	-0.2	1.26	0.95	-0.29	0.01	1.12	1.68	-0.38	0.52	0.91	1.21	-0.5	0.01	0.0425	0.295	-0.0325	0.941884	0.638416	0.956714	1	0.996511	0.992636
Armh3	Q6PD19	0.18	0.12	0.12	-0.01	0.21	0.24	0.67	0.16	-0.7	-0.43	0.59	0.11	-0.42	-0.16	0.35	0.67	0.2175	-0.21	0.0075	0.232445	0.485571	0.978025	1	0.996511	0.993727
Armt1	A6H630	0.98	0.51	0.35	-0.08	0.84	0.9	0.62	0.23	-0.25	1.28	0.11	0.82	-0.33	0.04	-0.01	0.19	0.2075	0.05	-0.4675	0.452757	0.898347	0.110139	1	0.996511	0.710755
Arnt2	Q61324-2	-1.09	-0.93	-1.22	-1.29	-0.75	-1.25	-1.3	-1.41	-0.98	-1.17	-0.93	-0.94	-1.16	-0.62	-1.35	-1.52	-0.045	0.1275	-0.03	0.821758	0.466273	0.902981	1	0.996511	0.985011
Arntl	A0A1B0GS77	-4.58	-4.58	-2.26	-2.24	-5.03	-5.07	-3.18	-3.95	-4.75	-0.99	-2.25	-5.06	-1.17	-2.76	-1.67	-1.73	-0.8925	0.1525	1.5825	0.245018	0.886596	0.0428323	1	0.996511	0.658454
Arpc1a	Q9R0Q6	-0.51	-0.62	0.51	0.93	0.05	-0.26	0.5	0.82	-1.01	-0.66	0.67	-0.98	-1.74	-0.9	0.32	0.1	0.2	-0.5725	-0.6325	0.637388	0.279977	0.278062	1	0.996511	0.822084
Arpc1b	Q91Z25	-0.07	-0.13	-0.28	-0.24	-0.09	-0.34	-0.15	-0.17	-0.33	-0.36	-0.22	0.02	-0.6	-0.03	-0.51	-0.6	-0.0075	-0.0425	-0.255	0.959853	0.806171	0.236974	1	0.996511	0.792722
Arpc2	Q9CVB6	1.65	0.74	1.22	1.88	1.05	1.61	1.48	2.2	1	0.81	1.47	1.48	-0.01	-0.19	0.71	1.06	0.2125	-0.1825	-0.98	0.530693	0.555993	0.0275335	1	0.996511	0.635993
Arpc3	Q9JM76	0.44	-0.05	0.57	0.49	-0.47	0.49	0.34	0.63	0.26	-0.06	0.79	0	-0.67	0.7	0.12	-0.3	-0.115	-0.115	-0.4	0.687817	0.65849	0.244477	1	0.996511	0.799771
Arpc4	P59999	0.53	0.29	-0.2	-0.77	1.37	0.28	-0.24	-0.14	-1.09	-1.64	-0.3	0.01	-2.62	-0.79	-1.47	-0.69	0.355	-0.7175	-1.355	0.425132	0.134162	0.0216124	1	0.996511	0.621926
Arpc5	Q9CPW4	-0.24	-0.32	0.11	0.16	0.68	-0.48	-0.05	0.29	0	-0.1	0.11	-0.62	-0.45	0.15	-0.12	-0.26	0.1825	-0.08	-0.0975	0.517466	0.731922	0.664488	1	0.996511	0.949825
Arpc5l	Q9D898	0.58	0.16	-0.05	-0.66	0.68	0.27	-0.31	-0.5	-0.3	-0.54	-0.43	-0.16	-0.98	0.31	-0.85	-0.56	0.0275	-0.365	-0.5275	0.938721	0.218143	0.187506	1	0.996511	0.776843
Arpin	Q9D0A3	-0.12	-0.8	-0.27	-0.29	-0.22	-0.84	0.07	-0.47	-0.65	-0.43	-0.37	-0.52	-0.75	-0.28	-0.53	-0.29	0.005	-0.1225	-0.0925	0.984283	0.555852	0.689037	1	0.996511	0.955729
Arpp19	P56212	-0.58	-0.8	-1.51	-1.69	-1.16	-0.96	-1.65	-1.56	-0.45	-0.63	-1.18	-0.48	-0.6	-0.23	-1.75	-1.88	-0.1875	0.46	0.03	0.549559	0.174028	0.948308	1	0.996511	0.992476
Arpp21	Q9DCB4	0.46	0.8	-0.08	0.17	-0.22	-0.07	0.02	-0.16	1.37	-0.07	-0.05	1.17	1.67	1.33	0.42	0.04	-0.445	0.2675	0.5275	0.0697703	0.519044	0.218711	1	0.996511	0.787447
Arpp21	Q9DCB4-2	-0.64	-2.36	-1.6	-2.57	-3.79	-0.95	-4.34	-1.92	1.29	0.71	-1.99	-0.93	1.83	-1.65	-2.68	-1.96	-0.9575	1.5625	0.6775	0.259777	0.0740028	0.495722	1	0.996511	0.89758
Arrb1	Q8BWG8	-0.59	-0.18	-0.11	-0.02	-0.39	-0.27	-0.06	-0.06	-0.63	-0.26	-0.17	-0.6	-1.13	-0.13	-0.49	-0.43	0.03	-0.19	-0.32	0.874024	0.383922	0.254865	1	0.996511	0.809524
Arrb2	Q91YI4	-0.41	-1.02	-0.54	-0.51	-1.08	-0.73	0.05	0.32	-1.18	0.54	-0.07	-1.18	-1.25	-0.8	-0.92	-0.35	0.26	0.1475	-0.21	0.455178	0.729111	0.427659	1	0.996511	0.879165
Arrdc1	A2AIS9	0.03	-0.64	0.94	0.78	-0.53	-0.24	0.59	0.89	-0.25	0.01	1.05	-0.06	0.06	0.55	0.2	0.57	-0.1	-0.09	0.0675	0.828104	0.838266	0.857813	1	0.996511	0.976225
Arsa	P50428	-0.45	-0.39	-0.15	-0.01	-0.69	-0.16	-0.21	-0.68	-0.94	0.35	-0.22	-0.61	-0.43	-1.22	-0.88	-0.48	-0.185	-0.105	-0.5025	0.382864	0.728198	0.0682154	1	0.996511	0.664936
Arsb	A0A0R4J138	-0.52	-0.55	-0.16	0.31	-0.59	-0.46	0.84	0.34	-0.58	-0.22	0.58	-0.55	-0.5	-0.3	-0.28	-0.04	0.2625	0.0375	-0.05	0.489686	0.91038	0.843722	1	0.996744	0.976225
Arsg	Q3TYD4	0.59	0.78	-0.4	-0.56	2.52	0.16	0.74	0.09	0.17	-1.65	0.72	-0.35	0.74	1.26	-1.07	-0.4	0.775	-0.38	0.03	0.220394	0.504811	0.958612	1	0.996511	0.992636
Arsj	Q8BM89	-5.14	-2.98	-3.13	-3.93	-2.63	-4.69	-3.96	-4.05	-1.72	0.03	-3.7	-4.51	1.16	0.04	-3.14	-3.89	-0.0375	1.32	2.3375	0.950043	0.21706	0.0728398	1	0.996511	0.668066
Arvcf	P98203	0.75	0.76	0.91	0.84	0.93	0.79	0.74	0.64	0.99	0.25	0.91	0.99	0.85	0.75	0.87	0.91	-0.04	-0.03	0.03	0.788173	0.891646	0.858435	1	0.996511	0.976225
Arxes2	C0HK80	0.3	0.91	0.78	-0.35	1.77	0.65	1.41	0.64	-1.69	-1.28	0.57	0.51	-1.4	-1.46	1.49	1.74	0.7075	-0.8825	-0.3175	0.0911387	0.167693	0.704035	1	0.996511	0.957084
As3mt	Q91WU5	-0.26	-0.57	0.12	0.77	-0.24	-0.37	-0.13	0.51	-0.5	0.95	0.2	-0.2	-0.51	-0.21	0.62	0.56	-0.0725	0.0975	0.1	0.829862	0.810594	0.798009	1	0.996511	0.969727
Asah1	Q9WV54	-0.02	-0.39	-1	-0.33	-0.26	-0.11	-1.17	-1.15	-0.35	-0.56	-0.38	-0.33	-0.93	-0.54	-1.57	-0.82	-0.2375	0.03	-0.53	0.488849	0.900249	0.113664	1	0.996511	0.716416
Asah2	B7ZN55	0.4	0.69	0.4	0.37	0.43	0.07	1.54	0.87	0.28	0.29	0.6	-0.1	0.23	0.27	0.92	1.19	0.2625	-0.1975	0.1875	0.419139	0.352666	0.499051	1	0.996511	0.899595
Asap1	H3BJY2	-0.22	-0.38	1.8	0.94	-0.91	-0.79	-0.27	1.25	-1.13	0.93	1.31	-1.09	-0.51	-3.82	0.23	-0.71	-0.715	-0.53	-1.7375	0.288133	0.486207	0.0878774	1	0.996511	0.691619
Asap1	E9QMJ1	0.39	0.04	0.49	0.68	0.18	0.45	0.05	0.61	0.14	0.33	0.51	0.07	-0.07	0.32	-0.2	-0.05	-0.0775	-0.1375	-0.4	0.715443	0.517698	0.100723	1	0.996511	0.698156
Asap2	D3YX85	1.01	0.52	-0.02	-3.32	-1.81	0.66	-4.58	-3.46	3.13	-3.17	-1.08	0.22	3.96	-0.32	2.53	-2.28	-1.845	0.2275	1.425	0.192962	0.876678	0.360443	1	0.996511	0.85741
Asap2	E9PX52	-0.06	0.34	0.81	0.75	0.39	-0.04	0	0.31	0.24	0.89	0.72	0.15	0.06	0.62	0.26	0.27	-0.295	0.04	-0.1575	0.246359	0.887339	0.551322	1	0.996511	0.914255
Asb13	Q8VBX0	-0.28	0.35	1.98	-0.13	0.7	-0.69	-0.03	-0.34	-0.37	0.31	-0.18	-0.18	-0.13	-0.06	1.63	0.64	-0.57	-0.585	0.04	0.312771	0.261262	0.947162	1	0.996511	0.992376
Asb3	A0A0N4SV07	0.33	-0.14	-1.2	-1.94	-1.29	1.27	-0.88	-2	0.14	-2.76	-1.2	0.84	2.45	-1.83	-1.78	-1.25	0.0125	-0.0075	0.135	0.987296	0.992974	0.895187	1	0.999285	0.983509
Asb6	Q91ZU1	-0.59	-0.37	0.1	-2.04	0.02	-0.74	-1.84	-1.17	0	2.42	-0.87	-0.63	-0.65	0.39	-1.4	0.17	-0.2075	0.955	0.3525	0.708638	0.2514	0.539075	1	0.996511	0.912212
Ascc1	Q9D8Z1	-0.07	-0.03	0.1	-0.4	-0.19	-0.81	-0.13	-0.14	-0.19	0.12	-0.22	-0.11	-0.07	-0.09	-0.08	0.38	-0.2175	3.80257e-17	0.135	0.336238	1	0.530666	1	1	0.908944
Ascc2	Q91WR3-2	-1.7	-0.5	-0.99	-1.12	-1.85	-0.86	-0.93	-0.85	-0.96	0.45	0.1	-1.35	-0.94	-0.92	-0.82	-0.04	-0.045	0.6375	0.3975	0.893271	0.191622	0.248712	1	0.996511	0.804385
Ascc3	E9PZJ8	-0.63	-0.6	0.16	-0.21	-0.36	-0.72	0.24	0.02	-0.37	0.47	0.19	-0.16	-0.3	-0.29	0.14	0.23	0.115	0.3525	0.265	0.686738	0.224238	0.325166	1	0.996511	0.842881
Asf1a	Q9CQE6	-0.18	-0.1	-0.88	-0.22	0.39	-0.15	-1.05	-0.09	-0.67	0.32	-0.24	0.05	-0.31	0.71	-0.65	-1.01	0.12	0.21	0.03	0.723894	0.472397	0.939785	1	0.996511	0.990645
Ash2l	Q91X20	-2.4	-2.12	-2.47	-2.97	-1.61	-2.92	-3.01	-3.17	-1.92	-0.83	-2.81	-2.77	-1.35	-0.99	-2.55	-2.9	-0.1875	0.4075	0.5425	0.624433	0.392919	0.261429	1	0.996511	0.81412
Asic1	Q6NXK8	0.51	0.31	0.31	0.63	0.44	0.44	0.66	0.62	0.6	1.34	0.75	0.53	0.52	0.95	0.67	0.6	0.1	0.365	0.245	0.537354	0.141855	0.22918	1	0.996511	0.787447
Asic2	Q925H0-2	0.06	0.1	0.16	-0.14	0.47	0.68	0.24	0.05	-1.33	-0.28	0.15	0.65	-1.59	-2.84	0.01	0.17	0.315	-0.2475	-1.1075	0.124927	0.546809	0.117029	1	0.996511	0.718608
Asic2	Q925H0	-0.62	-0.37	-0.87	-0.57	-0.61	-0.82	-0.25	-1.29	-0.19	-0.01	-1.01	-0.65	-0.6	0.45	-0.21	-0.68	-0.135	0.1425	0.3475	0.594802	0.594642	0.25517	1	0.996511	0.809524
Asic4	D3YYS9	-0.09	-0.17	0.86	1.32	-0.14	-0.27	1.01	1.27	0.66	1.49	0.85	0.11	0.55	-0.33	0.88	1.64	-0.0125	0.2975	0.205	0.979829	0.501721	0.688509	1	0.996511	0.955729
Asl	Q91YI0	-0.11	-0.25	-0.07	0.08	-0.35	-0.45	-0.12	0.04	-0.73	0.46	-0.24	-0.33	-0.96	-0.69	-0.28	-0.21	-0.1325	-0.1225	-0.4475	0.461917	0.653731	0.0812125	1	0.996511	0.687007
Asns	Q61024	-1.26	-1.51	-0.98	-1.02	-1.85	-1.26	-0.75	-0.69	-1.03	-0.43	-1.06	-1.24	-1.16	-1.17	-1.48	-1.72	0.055	0.2525	-0.19	0.8522	0.31139	0.414188	1	0.996511	0.874945
Aspa	Q8R3P0	4.25	2.28	0.41	-0.63	2.5	3.75	0	-0.75	-0.08	-1.62	-0.18	3.3	-0.51	-0.29	-0.11	0.44	-0.2025	-1.2225	-1.695	0.880276	0.373193	0.110954	1	0.996511	0.712422
Asph	A2AL85	0.08	0.45	0.39	0.31	1.06	0.36	1.43	0.72	0.26	0.05	0.25	0.19	0.22	1.03	0.98	1.3	0.585	-0.12	0.575	0.0441633	0.489271	0.0582831	1	0.996511	0.661738
Asph	Q8BSY0-3	-0.28	-0.03	0.87	0.74	0.82	-0.4	1.24	1.23	-0.63	0.51	1.63	-0.33	-0.34	0.39	1.34	1.8	0.3975	-0.03	0.4725	0.384579	0.955324	0.372711	1	0.996755	0.859424
Asphd1	Q2TA57	0.3	0.36	-0.03	-0.6	-0.34	-0.2	-0.8	-0.43	-0.34	-0.78	-0.63	-0.44	-0.43	-0.14	-0.74	-0.73	-0.45	-0.555	-0.5175	0.114279	0.0580802	0.0937296	1	0.996511	0.698156
Asphd2	Q80VP9	1.41	0.32	0.29	0.08	0.36	1.31	1.63	0.2	-0.15	-1.52	0.26	0.94	-0.78	-0.3	0.07	0.3	0.35	-0.6425	-0.7025	0.426543	0.2638	0.0869309	1	0.996511	0.691619
Aspscr1	Q8VBT9	0.23	0.33	-0.28	-0.5	0.09	0.73	-0.67	-0.48	0.01	-0.12	-0.15	0.33	-0.19	-0.01	-0.46	-0.46	-0.0275	0.0725	-0.225	0.938639	0.772854	0.393607	1	0.996511	0.865775
Asrgl1	Q8C0M9	0.01	-0.33	-0.48	-0.23	-0.35	0.1	-0.15	-0.28	-0.08	-0.51	-0.46	-0.24	-0.27	-0.43	-0.6	-0.48	0.0875	-0.065	-0.1875	0.63787	0.74065	0.349885	1	0.996511	0.85327
Ass1	P16460	0.11	-0.19	-0.14	-0.37	-0.37	-0.27	0.11	-0.22	-0.21	0.14	-0.56	-0.28	-0.3	0.1	-0.18	-0.55	-0.04	-0.08	-0.085	0.829084	0.710594	0.699074	1	0.996511	0.955729
Astn1	Q61137-2	0.53	0.57	0.99	1.08	0.52	0.74	0.91	1.01	0.84	0.76	1.17	0.97	0.33	0.42	0.69	0.83	0.0025	0.1425	-0.225	0.990353	0.50365	0.338591	1	0.996511	0.847578
Astn2	Q80Z10	0.75	0.71	0.26	0.19	0.55	1.13	0.07	0.13	0.16	-0.42	0.33	1.02	0.07	0.07	-0.16	0.28	-0.0075	-0.205	-0.4125	0.979084	0.537605	0.0901729	1	0.996511	0.69238
Asxl2	D3Z112	-2.38	-1.06	0.96	1.44	-0.4	-3.31	0.52	3.97	-1.65	1.28	0.61	-0.96	-1.49	-0.38	-0.8	-0.06	0.455	0.08	-0.4225	0.770435	0.936536	0.62044	1	0.996755	0.93807
Atad1	Q9D5T0	0.52	-0.06	0.01	-0.45	0.46	0.89	0.16	-0.02	-0.42	0.15	0.4	0.59	-0.18	0.09	0.16	0.1	0.3675	0.175	0.0375	0.217204	0.565687	0.879736	1	0.996511	0.979626
Atad2b	E9Q166	1.07	0.5	0.73	0.56	0.25	0.02	0.02	0.29	0.65	0.8	1.13	0.77	1.1	0.33	0.8	1.3	-0.57	0.1225	0.1675	0.0134818	0.560214	0.540785	1	0.996511	0.912212
Atad3	Q925I1	1.13	1.06	0.96	1.08	0.65	1.09	0.53	0.94	1.04	0.82	0.92	0.94	1.03	1.02	0.58	0.55	-0.255	-0.1275	-0.2625	0.179595	0.427827	0.216536	1	0.996511	0.787447
Atat1	Q8K341-4	0.7	1.1	0.86	0.47	1.04	0.95	0.64	0.56	1.34	1.1	0.99	1.06	1.38	1.7	0.67	0.66	0.015	0.34	0.32	0.942019	0.11889	0.308599	1	0.996511	0.834095
Atcay	Q8BHE3	1.36	-0.01	0.37	1.31	-0.67	1.21	0.83	1.52	1.46	0.44	1.08	1.83	0.53	0.17	0.33	0.2	-0.035	0.445	-0.45	0.948705	0.314895	0.21998	1	0.996511	0.787447
Ate1	A0A1L1SQ41	-0.45	-0.85	-0.58	-0.75	-1.18	-0.58	-0.66	-0.52	-0.09	-0.34	-0.57	-0.26	0.18	-0.9	-0.5	-0.68	-0.0775	0.3425	0.1825	0.707018	0.09963	0.50911	1	0.996511	0.902804
Atf2	P16951	-3.78	-2.73	-1.95	-3.01	-1.83	-3.22	-2.13	-3.54	-1.37	-2.23	-2.02	-2.07	-3.94	-0.62	-1.03	-2.63	0.1875	0.945	0.8125	0.717121	0.0416627	0.30655	1	0.996511	0.832533
Atf7ip	Q7TT18	-1.05	-2.52	-1.75	-0.26	-1.98	-1.82	-0.97	0.02	-2.24	1.66	-0.25	-2.05	-1.75	-1.15	0.31	-0.71	0.2075	0.675	0.57	0.733373	0.474046	0.351467	1	0.996511	0.853984
Atg101	Q9D8Z6	0.11	0.64	0.54	0.64	0.26	0.02	0.1	0.42	0.47	0.37	0.57	0.21	0.71	1	0.66	0.57	-0.2825	-0.0775	0.2525	0.166447	0.697286	0.254962	1	0.996511	0.809524
Atg12	Q9CQY1	-2.01	-1.98	-1.14	-1.08	-2.05	-1.3	-1.12	-1.17	-1.52	-0.53	-0.76	-2.15	-2	-0.92	-1.42	-2	0.1425	0.3125	-0.0325	0.664119	0.470241	0.928011	1	0.996511	0.98946
Atg13	Q91YI1-2	0.13	1.02	1.76	1.51	0.49	0.01	1.31	1.55	0.18	2.96	1.42	0.59	0.35	0.07	1.71	2.5	-0.265	0.1825	0.0525	0.576558	0.77901	0.932303	1	0.996511	0.989713
Atg14	Q8CDJ3	-1.33	-1.74	-0.59	-0.86	-1.52	-0.99	0.52	-0.42	-0.55	0.37	-0.53	-1.06	0.39	-1.04	-0.65	0.42	0.5275	0.6875	0.91	0.278178	0.096567	0.058471	1	0.996511	0.661738
Atg16l1	Q8C0J2	0.3	0.17	0.13	0.31	-0.42	-0.02	-0.55	0	0.52	0.58	0.15	0.02	0.2	-0.3	-0.59	-0.75	-0.475	0.09	-0.5875	0.0302548	0.64905	0.0394964	1	0.996511	0.658454
Atg2a	Q6P4T0	-0.1	0.29	0.31	0.03	0.49	-0.17	-0.23	0.01	0.43	0.68	0.18	-0.09	0.32	0.72	0.17	0.37	-0.1075	0.1675	0.2625	0.622019	0.467762	0.234404	1	0.996511	0.790657
Atg2b	Q80XK6	0.4	0.36	0.17	0.03	0.27	0.16	0.05	-0.02	0.23	0.84	0.07	0.33	0.19	0.6	0.01	0.14	-0.125	0.1275	-0.005	0.455586	0.571114	0.981094	1	0.996511	0.994858
Atg3	Q9CPX6	-0.51	-0.15	0.11	-0.37	0.17	-0.59	0.32	-0.03	-0.85	-0.32	0.02	-0.28	-1.52	-0.64	-0.29	0.24	0.1975	-0.1275	-0.3225	0.441875	0.611815	0.409438	1	0.996511	0.87457
Atg4b	A0A0R4J065	0.1	0.57	-1.7	-1.4	0.48	0.01	-0.92	-1.8	0.36	-1.34	-1.72	0.06	-0.35	1.23	-2.05	-0.99	0.05	-0.0525	0.0675	0.94147	0.939079	0.932372	1	0.996755	0.989713
Atg4c	Q811C2	-0.51	0.47	0.49	0.37	0.12	0.12	-1.57	-1.79	0.5	0.51	0.52	-0.11	0.7	0.28	0.07	0.7	-0.985	0.15	0.2325	0.0896164	0.611802	0.44628	1	0.996511	0.884817
Atg5	Q99J83	-0.01	-0.07	1.1	0.93	0.52	0.06	0.4	1.27	-0.14	-0.35	0.77	-0.16	-0.79	-0.26	-0.05	-0.19	0.075	-0.4575	-0.81	0.843147	0.250873	0.0411421	1	0.996511	0.658454
Atg7	A0A0A0MQN4	-0.01	0.13	0.33	0.22	0.28	-0.16	0.26	0.22	-0.26	0.3	0.1	-0.12	-0.69	0.18	0.04	0.12	-0.0175	-0.1625	-0.255	0.920373	0.415262	0.321166	1	0.996511	0.839916
Atg9a	Q68FE2	0.43	0.17	0.2	0.02	0.39	0.64	0.13	0.31	0.5	-0.36	0.54	0.41	0.77	-0.39	0	0.14	0.1625	0.0675	-0.075	0.379273	0.788653	0.786931	1	0.996511	0.968024
Atic	Q9CWJ9	-0.26	-0.51	-0.11	-0.03	-0.54	-0.22	-0.09	-0.03	-0.21	0.12	-0.22	-0.24	-0.52	-0.09	-0.46	-0.23	0.0075	0.09	-0.0975	0.968878	0.640937	0.63902	1	0.996511	0.942804
Atl1	Q8BH66	0.67	0.49	0.81	0.73	0.99	0.81	1	0.96	0.52	0.19	0.8	0.71	0.64	0.86	0.99	1.1	0.265	-0.12	0.2225	0.110217	0.553353	0.268502	1	0.996511	0.820082
Atl2	Q6PA06	-0.16	-0.13	-0.42	-0.32	0.03	-0.11	-0.16	-0.36	-0.2	-0.2	-0.48	-0.18	-0.15	0.26	-0.12	-0.43	0.1075	-0.0075	0.1475	0.517579	0.965416	0.495049	1	0.996755	0.89758
Atl3	Q91YH5	0.19	0.29	-0.15	-0.5	0.48	-0.01	0.01	-0.51	0.25	-0.25	-0.3	0.36	0.25	0.48	0.09	0.01	0.035	0.0575	0.25	0.898538	0.8278	0.320141	1	0.996511	0.839402
Atox1	O08997	0.16	0.06	-1.97	-1.83	-0.14	-0.34	-1.45	-2.06	-0.09	-1.2	-1.92	0.3	-0.3	0.77	-2.38	-2.63	-0.1025	0.1675	-0.24	0.878477	0.811597	0.790723	1	0.996511	0.969105
Atp11a	E9Q3G7	1.55	0.68	0.91	0.56	1.05	1.57	0.97	0.54	0.54	0.48	0.48	1.4	0.75	0.71	1.04	0.85	0.1075	-0.2	-0.0875	0.72312	0.532378	0.738143	1	0.996511	0.958796
Atp11b	Q6DFW5	-0.09	-0.11	-1.25	-1.46	0.37	-0.02	-0.91	-1.41	-0.79	-1.24	-0.92	0.01	-0.76	-0.44	-1.17	-0.86	0.235	-0.0075	-0.08	0.642751	0.985982	0.834841	1	0.998892	0.975487
Atp11c	E9QKK8	-0.12	0.41	0.29	0.25	0.4	0.16	0.77	0.42	-0.4	0.28	0.15	0.1	-0.23	-0.09	0.03	0.8	0.23	-0.175	-0.08	0.272802	0.441676	0.774149	1	0.996511	0.966062
Atp13a1	Q9EPE9	-0.34	-0.24	-0.24	-0.26	0.29	-0.17	0.27	-0.32	-0.6	-0.42	-0.39	-0.1	-0.45	-0.01	0.32	0.34	0.2875	-0.1075	0.32	0.162458	0.546499	0.189115	1	0.996511	0.776843
Atp13a2	E9PYX5	0.09	0.39	1.23	1.59	0.47	0	1.54	1.68	0.26	0.8	1.98	0.34	-0.13	0.68	1.48	1.77	0.0975	0.02	0.125	0.844695	0.96762	0.808039	1	0.996755	0.971953
Atp13a3	Q5XF89	-0.71	0.07	0.56	-0.42	-0.27	-1.14	0.38	-1.49	-0.52	-0.72	-0.69	-0.83	-0.96	0.03	-1.26	-0.53	-0.505	-0.565	-0.555	0.29934	0.0821911	0.173585	1	0.996511	0.764376
Atp13a4	A0A0R4J0M2	-0.09	-0.31	-0.21	0.83	-0.4	-0.76	0.81	1.11	0.15	0.32	0.3	-0.02	-1.29	-0.35	0.07	1.02	0.135	0.1325	-0.1925	0.781212	0.643375	0.705918	1	0.996511	0.957084
Atp1a1	Q8VDN2	0.86	1.02	1.32	1.29	1.31	0.86	1.02	1.25	0.51	0.84	1.36	0.8	0.4	0.86	0.66	0.83	-0.0125	-0.245	-0.435	0.947582	0.31704	0.0646314	1	0.996511	0.66433
Atp1a2	Q6PIE5	0.93	0.73	0.53	1	0.85	1	0.66	0.73	0.75	0.64	0.46	1.02	0.22	0.79	-0.04	0.54	0.0125	-0.08	-0.42	0.943617	0.696744	0.114967	1	0.996511	0.717287
Atp1a3	A0A0G2JGX4	0.38	0.58	0.67	0.94	0.65	0.4	0.87	0.9	0.46	0.6	0.7	0.53	0.05	0.81	0.42	0.62	0.0625	-0.07	-0.1675	0.752966	0.708866	0.489841	1	0.996511	0.897531
Atp1b1	P14094	1.78	1.35	1.76	2.14	1.22	1.79	1.86	2.11	1.27	1.36	1.75	1.87	0.96	0.79	1.61	1.82	-0.0125	-0.195	-0.4625	0.961237	0.432344	0.157721	1	0.996511	0.751678
Atp1b2	P14231	2.2	1.77	1.38	1.78	1.77	1.89	1.88	1.93	1.41	1.71	1.55	2.17	0.95	1.43	1.3	1.56	0.085	-0.0725	-0.4725	0.676196	0.777373	0.0833972	1	0.996511	0.689531
Atp1b3	P97370	0.71	0.72	-0.44	-0.47	0.55	0.72	-0.36	-0.67	0.37	-0.49	-0.48	0.79	0.38	0	-0.72	-0.52	-0.07	-0.0825	-0.345	0.87534	0.850782	0.403476	1	0.996511	0.870698
Atp23	G3UW46	0.24	-0.02	-0.4	-0.33	0.98	1.84	-0.14	-0.31	-0.06	-1.55	-0.21	0.21	0.8	0.14	-1.15	-0.44	0.72	-0.275	-0.035	0.164438	0.498384	0.933696	1	0.996511	0.989767
Atp2a2	O55143	0.26	0.18	0.57	0.67	0.49	0.29	0.62	0.62	0.13	0.34	0.23	0.08	0.31	0.58	0.39	0.72	0.085	-0.225	0.08	0.646198	0.254146	0.703253	1	0.996511	0.956919
Atp2a3	B1ATS5	-0.73	-1.4	-0.47	-0.45	-0.8	-1.5	-0.4	-0.55	-0.27	0.19	-0.21	-1.19	0.61	-0.32	-0.01	-0.13	-0.05	0.3925	0.8	0.876489	0.28952	0.0277041	1	0.996511	0.635993
Atp2b1	G5E829	0.62	0.64	0.36	0.44	0.69	0.66	0.31	0.23	0.31	-0.29	0.34	0.78	0.38	-0.32	0.05	0.1	-0.0425	-0.23	-0.4625	0.81453	0.373987	0.0556152	1	0.996511	0.661738
Atp2b1	A0A1W2P772	0.24	0.44	1.02	1.2	0.11	0.1	0.98	0.95	1.07	0.76	1.01	0.56	0.56	1.06	0.16	0.54	-0.19	0.125	-0.145	0.566809	0.648003	0.636905	1	0.996511	0.942665
Atp2b2	F8WHB1	1.04	1.14	1.49	1.37	1.13	1.06	1.14	1.27	0.74	0.59	1.4	1.06	0.57	0.56	0.68	0.98	-0.11	-0.3125	-0.5625	0.516218	0.209019	0.0213754	1	0.996511	0.621926
Atp2b2	S4R1C4	-0.31	0.26	0.7	1.15	0.57	-0.37	0.6	0.7	0.1	0.16	0.7	0.15	-0.08	0.67	0.84	1.21	-0.075	-0.1725	0.21	0.843322	0.612463	0.601134	1	0.996511	0.930802
Atp2b3	Q0VF55	0.54	0.56	0.77	0.75	0.57	0.67	0.5	0.62	0.45	0.37	0.58	0.46	0.47	0.18	0.39	0.7	-0.065	-0.19	-0.22	0.66345	0.263398	0.277408	1	0.996511	0.822084
Atp2b3	A2ALL9	0.46	1.12	0.69	0.54	1.91	0.47	0.77	0.39	0.39	0.14	0.62	0.54	0.36	1.05	0.36	0.79	0.1825	-0.28	-0.0625	0.618482	0.222619	0.807151	1	0.996511	0.97178
Atp2b4	E9Q828	1.72	1.59	1.34	1.61	1.69	1.97	1.51	1.67	1.22	1.11	1.55	1.9	0.85	0.74	1.42	1.37	0.145	-0.12	-0.47	0.41487	0.602085	0.0713424	1	0.996511	0.668066
Atp2c1	H3BL44	-0.3	-0.37	-0.61	-0.56	-0.07	-0.25	-0.43	-0.54	-0.38	0.28	-0.32	-0.34	-0.36	-0.49	-0.17	-0.2	0.1375	0.27	0.155	0.441823	0.228967	0.415876	1	0.996511	0.874945
Atp5c1	A2AKU9	1.01	0.63	0.98	1.54	0.58	1.39	0.67	1.66	0.64	1.15	1.15	0.73	1.34	-0.42	0.34	0.51	0.035	-0.1225	-0.5975	0.912511	0.630933	0.15489	1	0.996511	0.750763
Atp5c1	Q8C2Q8	-0.33	0.75	0.08	-0.93	-0.43	0.27	-0.79	-0.51	1.11	0.06	-0.87	-0.15	-0.15	0.18	-1.19	1.03	-0.2575	0.145	0.075	0.520255	0.77325	0.888649	1	0.996511	0.98074
Atp5f1a	Q03265	0.88	0.82	0.65	1.09	0.71	0.64	0.89	1.15	0.87	0.51	0.98	0.7	0.37	0.91	0.24	0.63	-0.0125	-0.095	-0.3225	0.946492	0.623674	0.172753	1	0.996511	0.76428
Atp5f1b	P56480	-0.28	0.08	0.29	0.7	-0.02	-0.36	0.47	0.6	0.07	0.73	0.42	-0.44	-0.38	0.8	-0.07	0.24	-0.025	-0.0025	-0.05	0.93348	0.993824	0.878902	1	0.999285	0.979626
Atp5f1d	Q9D3D9	-1.51	-0.37	-1.3	-1.34	-0.32	-1.61	-1.42	-1.74	-1.52	-2.39	-1.12	-1.51	-1.63	-2.3	-1.82	-1.71	-0.1425	-0.505	-0.735	0.7167	0.18714	0.038438	1	0.996511	0.658454
Atp5f1e	P56382	0.12	-0.29	-0.2	-0.5	-0.78	0.53	-0.25	-0.12	1.52	-1.05	0.37	-0.38	2.69	-0.6	0.83	-0.68	0.0625	0.3325	0.7775	0.83337	0.530487	0.299737	1	0.996511	0.829161
Atp5j2	F8WHP8	0.29	0.59	0.38	0.64	0.73	0.46	0.81	0.63	0.3	-0.8	0.77	0.28	-0.14	1.19	-0.19	0.22	0.1825	-0.3375	-0.205	0.292917	0.332899	0.542668	1	0.996511	0.912212
Atp5mc1	Q9CR84	1.5	0.78	1.61	1.22	-0.44	3	0.05	0.93	4.27	-1.55	1.46	0.95	5.09	-1.31	1.51	1.43	-0.3925	0.005	0.4025	0.582636	0.996313	0.733876	1	0.999713	0.958635
Atp5me	Q06185	0.53	1.73	-0.61	-0.72	1.26	0.98	-0.1	-0.34	1.29	-2.39	0.09	0.32	0.39	1.18	-1.56	-0.51	0.2175	-0.405	-0.3575	0.731837	0.645538	0.632967	1	0.996511	0.941132
Atp5mg	Q9CPQ8	2	0.6	0.29	1.26	-0.04	1.34	0.97	1.63	1.55	-0.39	1.19	1.82	0.42	0.85	-0.29	0.16	-0.0625	0.005	-0.7525	0.897658	0.993032	0.105572	1	0.999285	0.703417
Atp5mj	P56379	0.48	0.79	0.04	0	0.32	0.71	0.67	0.24	-1.05	-2.26	0.52	0.58	-0.75	-2.78	0.85	0.84	0.1575	-0.88	-0.7875	0.515788	0.197169	0.335074	1	0.996511	0.847354
Atp5mk	Q78IK2	0.32	0.72	0.56	0.64	0.78	0.33	0.74	0.6	-0.25	0.7	0.64	0.05	-0.08	0.64	0.12	0.57	0.0525	-0.275	-0.2475	0.769939	0.313465	0.309413	1	0.996511	0.834523
Atp5pb	Q9CQQ7	0.5	0.73	0.5	0.36	0.53	0.56	0.29	0.39	0.2	0.14	0.6	0.18	0.14	0.69	-0.03	0.07	-0.08	-0.2425	-0.305	0.621188	0.222353	0.199784	1	0.996511	0.78004
Atp5pd	Q9DCX2	1.62	1.38	1.07	1.61	1.07	1.12	1.28	1.55	1.3	1.54	1.31	1.46	0.92	1.59	0.95	0.89	-0.165	-0.0175	-0.3325	0.420843	0.928439	0.20127	1	0.996755	0.780919
Atp5pf	P97450	1.41	1.07	0.96	1.52	0.61	0.96	0.82	1.57	1.38	0.99	1.46	1.56	1.09	1.34	0.57	0.59	-0.25	0.1075	-0.3425	0.342393	0.62752	0.211792	1	0.996511	0.786269
Atp5po	Q9DB20	0.39	0.26	0.35	0.67	0.17	0.34	0.19	0.64	0.33	0.36	0.29	0.22	0.2	0.15	0.25	0.18	-0.0825	-0.1175	-0.2225	0.653968	0.497131	0.238874	1	0.996511	0.793481
Atp6ap1	Q9R1Q9	0.41	0.69	0.86	0.45	1.08	0.45	0.86	0.92	-0.05	0.43	0.68	0.45	0.11	0.41	0.72	0.9	0.225	-0.225	-0.0675	0.284029	0.326231	0.780328	1	0.996511	0.9676
Atp6ap2	Q9CYN9	0.2	0.9	1.14	0.64	0.29	0.53	0.74	0.88	-0.61	-1.07	0.97	0.31	-0.29	-0.5	0.84	1.05	-0.11	-0.82	-0.445	0.662385	0.107689	0.305874	1	0.996511	0.832533
Atp6v0a1	K3W4T3	0.8	0.71	1.28	1.42	0.58	0.93	0.92	1.52	0.61	1.01	1.35	0.94	0.4	0.29	0.82	1.13	-0.065	-0.075	-0.3925	0.808866	0.76776	0.186723	1	0.996511	0.776843
Atp6v0a1	Q9Z1G4	0.09	1.58	0.98	0.26	2.01	1.15	1.19	0.86	0.86	1.19	1.49	0.44	0.41	0.28	1.17	1.36	0.575	0.2675	0.0775	0.174753	0.502652	0.852803	1	0.996511	0.976225
Atp6v0a2	P15920	-0.69	-0.77	-0.7	-0.73	-0.52	-0.58	-0.79	-0.57	-0.76	-0.34	-0.75	-0.53	0.07	-0.57	-0.64	-0.75	0.1075	0.1275	0.25	0.46754	0.471592	0.293716	1	0.996511	0.825612
Atp6v0c	E9Q9C5	-0.72	0.43	0.58	0.05	0.68	0.23	0.34	-0.03	0.32	0.02	0.46	-0.25	0.58	-0.3	0.13	0.28	0.22	0.0525	0.0875	0.49616	0.873192	0.79887	1	0.996511	0.969753
Atp6v0d1	P51863	0.91	0.42	0.3	0.35	0.5	0.82	0.07	0.09	1.49	0.57	0.09	1.03	-0.03	0.69	-0.17	0.34	-0.125	0.3	-0.2875	0.609298	0.374894	0.295521	1	0.996511	0.825612
Atp6v1a	P50516	1.72	1.38	1.34	0.93	1.23	1.65	1.41	1.32	1.33	0.76	1.22	1.84	0.64	0.93	1.01	1.22	0.06	-0.055	-0.3925	0.777747	0.846988	0.129159	1	0.996511	0.723655
Atp6v1b2	P62814	0.1	0.29	0.63	0.63	0.21	0.11	0.4	0.69	0.27	0.57	0.6	0.27	0.06	0.4	0.31	0.39	-0.06	0.015	-0.1225	0.776265	0.941807	0.56528	1	0.996755	0.920487
Atp6v1c1	Q9Z1G3	1.37	1.08	0.91	0.82	0.99	1.18	1.66	0.86	0.89	0.65	0.84	1.24	0.35	1.17	0.75	0.84	0.1275	-0.14	-0.2675	0.585395	0.517266	0.290216	1	0.996511	0.825134
Atp6v1d	P57746	0.75	1.04	0.95	0.8	0.85	0.66	0.9	0.9	0.73	0.51	0.9	0.75	0.11	0.53	0.56	0.77	-0.0575	-0.1625	-0.3925	0.712623	0.366976	0.090175	1	0.996511	0.69238
Atp6v1e1	P50518	3.21	2.46	2.19	1.43	2.93	3.03	2.29	2.33	0.52	0.52	2.22	3.26	0.46	0.3	1.89	2.29	0.3225	-0.6925	-1.0875	0.421265	0.335827	0.0844491	1	0.996511	0.690427
Atp6v1f	Q9D1K2	1.49	1.93	2.31	1.67	1.73	1.49	3.05	2.48	0.98	1.26	2.36	1.58	0.81	1.72	2.11	2.77	0.3375	-0.305	0.0025	0.383903	0.38368	0.995309	1	0.996511	0.998317
Atp6v1g1	Q9CR51	-0.5	-0.23	0.08	0.07	0.15	-0.51	-0.22	0.06	-0.1	0.66	0.39	-0.14	0.62	0.75	0.14	0.27	0.015	0.3475	0.59	0.946791	0.202015	0.0334525	1	0.996511	0.644622
Atp6v1g2	Q9WTT4	0.92	0.29	0.79	1.6	-0.24	0.34	0.18	1.55	1.59	1.36	0.79	1.01	1.04	-0.07	0.55	0.3	-0.4425	0.2875	-0.445	0.327325	0.384771	0.228875	1	0.996511	0.787447
Atp6v1h	A0A0A6YW86	-4.2	-5.13	-5.6	-5.83	-3.93	-3.28	-5.09	-6.21	-5.08	-2.57	-4.4	-4.14	-4.41	-3.59	-4.99	-5.24	0.5625	1.1425	0.6325	0.412273	0.0797977	0.211382	1	0.996511	0.786269
Atp6v1h	Q8BVE3	-0.33	-0.06	0.39	0.56	0.03	-0.12	0.49	0.64	-0.09	0.22	0.53	-0.25	-0.37	0.16	0.1	0.2	0.12	-0.0375	-0.1175	0.666262	0.893268	0.66326	1	0.996511	0.949825
Atp7a	A2AG68	0.38	0.47	0.78	0.25	0.1	-0.59	1.37	0.27	-1.08	1.01	0.62	-0.15	-0.79	-0.49	0.63	0.64	-0.1825	-0.37	-0.4725	0.648085	0.41736	0.234111	1	0.996511	0.790641
Atp8a1	P70704	1	0.81	0.55	0.55	0.82	1.07	0.64	0.65	0.46	0.25	0.52	0.96	0.24	0.31	0.48	0.51	0.0675	-0.18	-0.3425	0.720895	0.425612	0.1098	1	0.996511	0.709835
Atp8a2	P98200	0.64	0.84	0.86	0.6	1.21	0.99	1.03	0.65	0.05	0.31	0.69	0.83	0.19	0.12	0.84	1.13	0.235	-0.265	-0.165	0.213911	0.257877	0.556231	1	0.996511	0.917092
Atp9a	A2AQC3	-0.17	0.03	-0.14	-0.24	0.4	-0.11	-0.18	-0.49	0.12	-0.4	-0.14	0	0.66	0.41	0.25	0.35	0.035	0.025	0.5475	0.872251	0.893081	0.0157097	1	0.996511	0.589387
Atp9b	A0A286YCV0	0.49	0.77	-0.09	0.08	0.55	0.41	-0.36	-0.08	0.86	0.5	0	0.61	0.59	0.9	-0.18	0	-0.1825	0.18	0.015	0.532058	0.523193	0.963023	1	0.996511	0.9927
Atpaf1	H3BLL2	0.01	0.14	0.37	0.49	-0.13	0.17	0.02	0.45	0.78	-0.7	0.22	0.11	0.69	-0.03	-0.74	-0.33	-0.125	-0.15	-0.355	0.533558	0.644649	0.291946	1	0.996511	0.825497
Atpaf2	Q91YY4	-0.26	0.22	0	-0.17	0.69	0.03	0.68	0.22	-0.14	-0.33	0.58	0	-0.42	0.6	-0.15	0.38	0.4575	0.08	0.155	0.0638234	0.746815	0.581141	1	0.996511	0.927734
Atpif1	E9PV44	2.07	0.42	0.97	1.95	-0.81	1.39	-0.08	1.71	2.98	1.22	1.19	2.44	2.34	-0.08	0.93	0.48	-0.8	0.605	-0.435	0.240569	0.290169	0.473414	1	0.996511	0.891467
Atpsckmt	E0CXY7	-0.21	-0.14	0.18	0.47	0.46	-0.15	0.46	0.31	0.15	0.78	0.71	-0.11	0.29	1.69	0.38	0.36	0.195	0.3075	0.605	0.410011	0.288395	0.124921	1	0.996511	0.721448
Atraid	G3UXG8	-3.3	-3.7	-2.17	-4.5	-6.26	-1.5	-2.75	-3.21	-4.48	-5.4	-3.12	-2.79	-1.35	-4.65	-1.76	-2.67	-0.0125	-0.53	0.81	0.990067	0.460213	0.322185	1	0.996511	0.840788
Atrn	Q9WU60	-0.62	-0.42	-0.48	-0.2	-0.62	-0.26	-0.11	-0.57	0.24	-0.33	-0.31	-0.32	0.52	-0.09	0	-0.12	0.04	0.25	0.5075	0.832919	0.250943	0.0455641	1	0.996511	0.658454
Atrnl1	Q6A051	-0.14	-0.54	-0.49	-0.29	-0.53	0.16	-0.51	-0.75	0.65	-0.3	-0.54	-0.09	1.63	-1.12	-0.28	-0.41	-0.0425	0.295	0.32	0.856452	0.314339	0.564127	1	0.996511	0.920254
Atrx	Q61687	0.97	0.71	0.85	0.71	0.44	0.58	0.37	0.33	0.77	0.59	0.72	0.87	0.74	0.68	0.96	1.06	-0.38	-0.0725	0.05	0.03348	0.666473	0.79122	1	0.996511	0.969105
Atxn1	J3QPR1	-3.48	-3.62	-2.2	-2.18	-4.05	-3.71	-2.71	-2.86	-2.93	-0.95	-2.81	-2.37	-1.23	-2.34	-3.06	-3.1	-0.4625	0.605	0.4375	0.342048	0.292109	0.429804	1	0.996511	0.879165
Atxn10	P28658	-0.69	-0.82	-0.96	-0.91	-0.33	-0.82	-0.68	-0.8	-0.89	-0.48	-0.97	-0.53	-1.01	-0.7	-1.08	-0.71	0.1875	0.1275	-0.03	0.302983	0.513385	0.875416	1	0.996511	0.979626
Atxn1l	P0C7T6	-0.1	-0.69	-0.37	-0.13	-0.55	-1.15	-0.76	-0.23	-0.03	0.74	-0.65	-0.49	1.1	1.51	-0.19	-0.54	-0.35	0.215	0.7925	0.183962	0.52763	0.126276	1	0.996511	0.721505
Atxn2	E9QM77	-2.41	-2.73	-1.7	-1.75	-2.59	-2.96	-1.88	-2.03	-1.77	-0.49	-1.57	-2.32	-1.27	-1.56	-1.39	-1.72	-0.2175	0.61	0.6625	0.531086	0.184315	0.0443377	1	0.996511	0.658454
Atxn2	F6U2C2	-0.6	-0.92	-4.02	-4.31	-0.33	-1.12	-4.45	-4.14	-0.48	-1.79	-3.02	-0.69	-1.02	-0.76	-3.04	-3.47	-0.0475	0.9675	0.39	0.970482	0.360035	0.71769	1	0.996511	0.958398
Atxn2l	Q7TQH0-2	-1.9	-2.02	-2.01	-2.3	-2.09	-2.06	-2.07	-2.39	-1.61	-1.23	-2	-1.77	-1.05	-1.56	-2.06	-2.42	-0.095	0.405	0.285	0.578947	0.0934977	0.380844	1	0.996511	0.860984
Atxn3	Q9CVD2	-0.33	-0.77	-0.11	0.33	-0.63	-0.41	-0.15	0.15	1.33	0.18	-0.17	-0.4	1.95	-1.21	0.11	-0.51	-0.04	0.455	0.305	0.888554	0.299481	0.641679	1	0.996511	0.943421
Atxn7l3b	Q3UD01	-0.74	-0.21	-0.87	-0.59	0.16	-0.42	-0.49	-1.32	0.36	-0.43	-0.5	-0.12	-0.45	0.45	-1.67	-1.67	0.085	0.43	-0.2325	0.795391	0.126916	0.643304	1	0.996511	0.943874
Auh	A0A0R4J023	0.93	0.48	0.55	0.52	0.21	0.85	0.33	0.44	0.27	0.27	0.3	0.32	0.05	0.35	-0.12	0.15	-0.1625	-0.33	-0.5125	0.435434	0.088013	0.0320706	1	0.996511	0.641974
Aup1	P70295	0.7	0.77	-0.22	0.35	0.69	0.17	0.15	0.45	1.05	0.8	0.24	0.95	0.95	1.27	0.34	0.18	-0.035	0.36	0.285	0.895546	0.244905	0.413626	1	0.996511	0.874945
Aurkaip1	Q9DCJ7	-0.44	-0.46	-0.96	-0.26	-0.96	-0.15	0.76	-0.41	0.12	1.19	0.77	-1.53	0.03	1.82	0.03	-1.03	0.34	0.6675	0.7425	0.371068	0.25865	0.208998	1	0.996511	0.786218
Aven	A2AGL5	-1.6	-0.24	1.47	0.9	-0.09	-0.9	0.52	1.11	0.15	1.61	1.47	-1.58	-0.61	-2.32	1.13	1.48	0.0275	0.28	-0.2125	0.969764	0.75743	0.830228	1	0.996511	0.973939
Avl9	Q80U56	1.09	0.87	0.42	0.17	0.6	1.16	0.69	0.31	0.09	-0.55	0.62	1	0.13	0.12	0.14	0.46	0.0525	-0.3475	-0.425	0.849848	0.374426	0.123613	1	0.996511	0.721448
AW209491	Q91WD4	-0.54	-1.29	-1.1	-1.59	-1.4	-1.02	-2.28	-1.44	0.78	-4.35	-0.99	-1	0.8	-1.45	-0.21	-1.48	-0.405	-0.26	0.545	0.246835	0.791735	0.332484	1	0.996511	0.845601
AW551984	Q8BGF0	0.28	0.74	-0.43	0.2	0.48	0.17	0.85	0.18	0.25	0.71	0.15	0.76	0.31	0.26	1.19	0.65	0.2225	0.27	0.405	0.450217	0.371095	0.235489	1	0.996511	0.791493
Axl	Q6PE80	1.64	0.42	0.68	0.33	1.28	0.7	0.41	0.85	-0.17	-0.25	0.56	0.9	0.23	0.23	-0.35	0.51	0.0425	-0.5075	-0.6125	0.900193	0.21956	0.106206	1	0.996511	0.703417
Azi2	Q9QYP6	-0.22	-0.44	0.57	0.26	-1.51	0.08	-0.7	-0.23	1.96	1.02	0.13	0.02	2.74	-0.7	0.6	0.48	-0.6325	0.74	0.7375	0.133977	0.144882	0.296629	1	0.996511	0.825612
B2m	P01887	2.36	0.84	0.88	0.06	0.56	1.51	1.36	0.77	1.04	0.52	0.84	1.5	1.49	0.45	1.36	2.01	0.015	-0.06	0.2925	0.975618	0.901883	0.588626	1	0.996609	0.929131
B3galnt1	Q920V1	-1.83	-2.25	-1.34	-0.08	-1.73	-1.93	-0.79	-1.11	-1.54	-0.2	-0.55	-1.39	-1.54	-1.54	-0.81	0.12	-0.015	0.455	0.4325	0.975951	0.399585	0.451514	1	0.996511	0.885538
B3galt5	Q9JI67	-0.55	-0.31	-1.66	-1.18	-2.52	-0.08	-0.72	-1.21	1.16	0.6	-1.51	-1.16	1.93	-0.95	0.86	-0.98	-0.2075	0.6975	1.14	0.707289	0.305236	0.133055	1	0.996511	0.728417
B3galt6	Q91Z92	-1.67	-2.04	-2.36	-1.45	-0.97	-1.14	-1.71	-1.91	-1.17	-2.23	-2.33	-1.94	-2.16	-1.33	-1.8	-1.49	0.4475	-0.0375	0.185	0.160709	0.909129	0.526961	1	0.996744	0.90845
B3gat3	P58158	-1.3	-3.12	-1.33	-0.1	-2.31	-0.49	-1.34	-0.94	-1.37	-1.33	-1.13	-2.62	-0.3	-2.81	-0.36	-0.33	0.1925	-0.15	0.5125	0.772722	0.816822	0.522652	1	0.996511	0.907667
B3glct	Q8BHT6	-0.41	0.15	-0.71	-0.72	0.56	-0.27	0.2	-0.2	-0.24	0.19	-0.56	-0.21	-0.78	0.63	0.32	0.18	0.495	0.2175	0.51	0.107885	0.430531	0.181838	1	0.996511	0.776002
B4galnt1	Q09200	-0.86	-0.76	-0.7	-0.45	-0.49	-0.73	0.11	-0.16	-0.71	0.25	-0.59	-1.13	-0.65	-0.23	0.26	0.21	0.375	0.1475	0.59	0.123318	0.632159	0.0460477	1	0.996511	0.658454
B4galnt4	Q766D5	-3.81	-2.29	-3.04	-2.68	-4.61	-3.82	-6.99	-3.44	-6.84	-1.79	-4.3	-2.08	1.55	-9.06	-2.41	-0.87	-1.76	-0.7975	0.2575	0.0469492	0.471569	0.899122	1	0.996511	0.983509
B4galt3	Q91YY2	-0.26	0.04	-0.76	-0.74	-0.75	0.07	-0.39	-0.65	-0.21	-1.62	-1.45	-0.12	0.15	-0.24	-0.8	-0.28	7.85046e-17	-0.42	0.1375	1	0.331728	0.639287	1	0.996511	0.942804
B4galt7	D3Z065	-0.75	-1.09	-0.1	-0.37	-2.54	0.24	-1.61	0.32	1.31	0.09	0.81	-0.66	2.36	-1.58	-0.86	-1.61	-0.32	0.965	0.155	0.635074	0.0583585	0.858533	1	0.996511	0.976225
B4gat1	Q8BWP8	-2.3	-2.34	-1.39	-1.57	-1.13	-1.63	-1.33	-1.36	-2.01	-0.58	-1.28	-2.39	-1.6	-1.57	-1.08	-1.27	0.5375	0.335	0.52	0.0747017	0.457247	0.10173	1	0.996511	0.698697
B630019K06Rik	Q7TNS5	-0.05	0.86	-0.96	-0.56	0.64	-0.14	-0.91	-0.87	0.35	-1.05	-0.35	0	-0.13	0.29	-0.36	-0.82	-0.1425	-0.085	-0.0775	0.773973	0.854249	0.858069	1	0.996511	0.976225
B9d1	Q5NCM9	0.4	-0.28	1.21	1.22	-0.23	0.27	1.28	1.48	0.64	1.99	1.09	0.9	0.86	-2.05	0.8	1.52	0.0625	0.5175	-0.355	0.900915	0.25778	0.653676	1	0.996511	0.947633
Baalc	Q8VHV1	1	1.16	1.65	1.24	1.65	0.78	1.02	1.53	-0.8	0.65	1.39	0.98	-0.78	-1.19	1.63	1.86	-0.0175	-0.7075	-0.8825	0.945896	0.154276	0.246269	1	0.996511	0.802442
Babam1	Q3UI43	-0.19	0.11	-0.33	-0.62	0.43	-0.27	-0.91	-0.73	-0.02	0.43	-0.55	0.01	0.3	0.69	-0.42	-0.98	-0.1125	0.225	0.155	0.731032	0.410927	0.691767	1	0.996511	0.955729
Babam2	Q8K3W0	-0.39	-0.37	0.11	-0.08	-0.4	-0.06	-0.25	0.06	-0.73	0.63	0.03	-0.3	-0.44	-0.48	0.1	-0.2	0.02	0.09	-0.0725	0.917827	0.774159	0.749504	1	0.996511	0.961298
Bace1	P56818	0.18	0.52	0.6	0.16	-0.32	0.44	-0.46	-0.03	1.6	0.79	0.23	0.59	1.58	0.1	0.8	0.12	-0.4575	0.4375	0.285	0.0877138	0.187177	0.439978	1	0.996511	0.883445
Bad	Q61337	-0.7	-0.53	-1.13	-1.13	-0.68	-1.17	-2.32	-1.72	-0.13	-1.13	-1.02	-0.73	0.35	-0.65	-0.99	-1.09	-0.6	0.12	0.2775	0.129791	0.672382	0.446234	1	0.996511	0.884817
Bad	Q3U9H3	0.34	0.73	0.41	-0.05	1.37	0.1	-0.7	0.17	0.86	-0.05	0.34	0.98	0.63	-0.05	-0.52	0.86	-0.1225	0.175	-0.1275	0.774336	0.556917	0.717586	1	0.996511	0.958398
Bag1	F6TCF9	-0.62	-0.25	0.7	0.62	-0.28	-0.98	0.44	0.7	-0.98	0.64	0.36	-0.41	-0.66	-0.1	0.87	0.73	-0.1425	-0.21	0.0975	0.758897	0.650613	0.831422	1	0.996511	0.973982
Bag2	Q91YN9	-0.06	0.04	0.14	-0.16	0.11	0.3	-1	-0.53	0.7	-1.06	-0.12	-0.06	1.03	-0.66	0.12	-0.58	-0.27	-0.125	-0.0125	0.383404	0.727151	0.974131	1	0.996511	0.992977
Bag3	Q9JLV1	-0.42	-0.52	-0.43	-0.27	-1.33	-0.26	-0.8	-0.34	0.94	-0.12	-0.3	-0.24	1.5	-0.54	-0.25	-0.34	-0.2725	0.48	0.5025	0.311233	0.13911	0.281473	1	0.996511	0.822084
Bag4	Q8CI61	1	1.12	2.83	-2.12	1.37	1.05	2.41	0.95	-1.14	-1.97	1.66	1.57	-0.68	-1.08	2.74	2.49	0.7375	-0.6775	0.16	0.456088	0.588886	0.900958	1	0.996511	0.983757
Bag5	Q8CI32	-0.28	-0.25	0.45	0.64	-0.33	-0.33	0.93	0.82	-0.08	1.03	0.56	-0.17	0.16	-0.46	0.94	0.85	0.1325	0.195	0.2325	0.739706	0.59082	0.556634	1	0.996511	0.917092
Bag6	Q3UF95	0.01	0.16	-0.01	-0.08	0.25	-0.27	-0.31	-0.28	-0.55	-0.17	-0.34	0.12	-0.5	-0.54	-0.16	-0.26	-0.1725	-0.255	-0.385	0.364075	0.223722	0.0649557	1	0.996511	0.66433
Baiap2	Q8BKX1-2	0.84	1	1.38	1.04	1.13	0.7	1.55	1.36	0.47	0.49	1.44	1.2	0.59	0.58	1.45	1.29	0.12	-0.165	-0.0875	0.609903	0.564085	0.752765	1	0.996511	0.961479
Baiap3	S4R1K2	0.12	0.71	-1.73	0.04	-0.41	0.29	0.43	0.24	1.18	1.96	-1.1	0.13	0.58	-0.36	2.3	0.75	0.3525	0.7575	1.0325	0.499148	0.33745	0.161214	1	0.996511	0.757375
Bak1	O08734	-0.8	-0.64	-0.97	-1.24	0.06	-0.42	-0.52	-0.53	-0.31	-1.13	-0.45	-0.93	0.5	-0.34	-0.79	-0.64	0.56	0.2075	0.595	0.0272391	0.423585	0.091438	1	0.996511	0.693316
Banf1	O54962	0.98	1.73	1.72	1.41	1.21	0.67	2.25	1.41	0.7	1.26	1.44	0.9	1.27	1.53	1.78	1.76	-0.075	-0.385	0.125	0.833613	0.167224	0.616392	1	0.996511	0.936924
Basp1	Q91XV3	1.2	1.09	1.55	1.79	0.41	1.5	0.23	1.44	2.34	2.09	1.4	1.31	2.81	1.31	1.72	0.93	-0.5125	0.3775	0.285	0.174762	0.236869	0.500787	1	0.996511	0.900975
Bax	A0A1B0GT81	0.45	0.02	0	0.25	0	0.12	0.39	-0.32	-0.43	0.04	0.09	0.46	-0.17	0.18	-0.54	0.34	-0.1325	-0.14	-0.2275	0.532304	0.562146	0.382237	1	0.996511	0.860984
Baz1b	Q9Z277	1.26	0.91	1.06	0.96	0.9	0.97	0.98	0.92	0.66	0.02	1.23	0.98	0.72	0.77	1.35	1.49	-0.105	-0.325	0.035	0.496027	0.270469	0.887287	1	0.996511	0.980329
Baz2a	F8VPM0	1.13	1.03	1.67	2.37	-0.33	1.39	-0.7	1.06	2.18	1.65	1.42	0.57	2.44	0.38	1.58	0.95	-1.195	-0.095	-0.2125	0.0539984	0.825302	0.673203	1	0.996511	0.952944
Bbln	P58686	-0.96	0.23	0.29	0.66	0.07	-1.09	0.53	0.24	-0.51	0.31	0.27	-0.15	-0.67	0.54	-0.01	0.27	-0.1175	-0.075	-0.0225	0.800267	0.845907	0.957021	1	0.996511	0.992636
Bbs1	Q3V3N7	-0.05	-0.37	-0.34	0.12	-0.11	-0.58	0.04	-0.28	-0.54	-0.33	-0.27	-0.19	-1.19	-0.32	-0.31	-0.32	-0.0725	-0.1725	-0.375	0.727119	0.384613	0.191488	1	0.996511	0.777117
Bbs2	Q9CWF6	0.09	-0.44	-0.85	-0.77	-0.56	-0.77	-0.2	-0.64	-0.2	-0.5	-0.87	-0.28	-0.45	-0.22	-0.94	-0.33	-0.05	0.03	0.0075	0.845186	0.913005	0.978963	1	0.996755	0.994274
Bbs4	Q8C1Z7	0.53	0.4	-0.18	-0.75	0.34	0.24	0.91	-0.01	0.03	-0.76	-0.38	0.72	0.44	0.75	0.53	0.32	0.37	-0.0975	0.51	0.293994	0.812707	0.1327	1	0.996511	0.728417
Bbs5	A2AUC6	-1.16	-0.19	-0.01	0.06	-0.47	-0.56	0.25	-0.12	-2.37	1.33	0.65	-2.34	-2.2	-2.34	-0.29	-0.1	0.1	-0.3575	-0.9075	0.761477	0.697011	0.161206	1	0.996511	0.757375
Bbs7	E9Q0R0	-0.54	-0.72	0.03	-0.7	-0.67	-1.02	0.09	-0.42	-0.58	0.04	-0.24	-0.71	-0.51	-0.26	-0.03	0.2	-0.0225	0.11	0.3325	0.938489	0.676446	0.223993	1	0.996511	0.787447
Bbs9	Q811G0-2	0.58	1	0.16	-0.07	1.3	0.32	0.45	0.55	0.5	-1.2	0.13	0.6	-0.41	-0.13	-0.12	0.56	0.2375	-0.41	-0.4425	0.460513	0.373324	0.190464	1	0.996511	0.776843
BC004004	A0A3Q4L2X7	-0.79	0.64	0.42	-0.87	0.87	0.18	0.62	0.6	1.47	0.66	-0.21	0.54	1.52	1.86	-0.14	0.99	0.7175	0.765	1.2075	0.0985912	0.144148	0.0507374	1	0.996511	0.658454
BC024978	D3Z7G4	-0.01	-0.05	0.43	0.72	-0.35	-0.7	0.71	1.06	-2.09	0.49	0.72	-0.12	-0.85	-2.1	0.68	0.53	-0.0925	-0.5225	-0.7075	0.829217	0.401043	0.272248	1	0.996511	0.822084
Bcam	Q9R069	-0.76	-1.1	-0.73	-0.66	-0.95	-0.88	-0.37	-0.43	-1.12	-0.42	-0.69	-0.87	-0.63	-0.75	-0.27	-0.46	0.155	0.0375	0.285	0.463615	0.862441	0.189003	1	0.996511	0.776843
Bcan	Q61361	-0.72	-1.35	-1.09	-1.06	-1.13	-0.99	-1.02	-1.09	-1.64	-0.73	-1.11	-1.1	-1.24	-1.18	-1.03	-1.49	-0.0025	-0.09	-0.18	0.988846	0.720248	0.412604	1	0.996511	0.874811
Bcap29	Q61334	1.33	1.04	0.66	0.54	1.69	1.02	0.51	0.71	0.58	1.79	0.36	1.08	1.01	-1.48	1.18	0.73	0.09	0.06	-0.5325	0.772054	0.866258	0.380223	1	0.996511	0.860984
Bcap31	Q61335	0.33	0.57	0.72	0.64	0.49	0.17	0.43	0.63	0.34	0.78	0.3	0.25	1.06	0.39	1.37	0.89	-0.135	-0.1475	0.3625	0.4508	0.465304	0.177168	1	0.996511	0.772068
Bcar1	Q61140	0.4	0.48	0.4	0.68	0.5	0.09	0.59	0.46	0.67	0.76	0.42	0.23	1.01	0.65	0.33	0.37	-0.08	0.03	0.1	0.651713	0.87613	0.652435	1	0.996511	0.947633
Bcar3	Q9QZK2	0.61	0.32	0.32	0.21	0.25	-0.06	0.1	0.23	0.7	0.24	0.41	0.09	0.55	0.92	0.21	0.5	-0.235	-0.005	0.18	0.183909	0.98038	0.422454	1	0.998773	0.875782
Bcas1	Q80YN3	3.42	2.38	1.23	0.94	2.31	2.89	0.39	0.82	1.39	0.71	1.07	3.32	1.78	0.18	1.89	1.29	-0.39	-0.37	-0.7075	0.602648	0.618659	0.278963	1	0.996511	0.822084
Bcas2	Q9D287	0.72	-0.24	-0.44	-0.87	-0.16	-0.07	-0.73	-0.3	-0.48	0.08	-0.8	-0.04	-0.55	0.23	-0.36	-0.62	-0.1075	-0.1025	-0.1175	0.760476	0.786888	0.756262	1	0.996511	0.962333
Bcas3	B1AR74	0.3	0.32	0.38	0.33	0.25	0.27	0.2	0.33	-0.01	-0.02	0.35	0.45	-0.12	-0.11	0.1	-0.05	-0.07	-0.14	-0.3775	0.613592	0.455842	0.049012	1	0.996511	0.658454
Bcas3	Q8CCN5	0.29	0.74	0.22	0.49	0.18	-0.2	-0.21	-0.31	1.64	0.58	-0.08	0.43	1.23	1.55	0.04	-0.63	-0.57	0.2075	0.1125	0.0161781	0.576498	0.818014	1	0.996511	0.972768
Bcat1	Q8CBC8	-0.86	-0.57	0.3	0.45	-0.87	-0.7	0.36	0.3	-0.75	0.13	0.15	-0.62	-0.74	-0.07	0.24	0.38	-0.0575	-0.1025	0.1225	0.89288	0.790698	0.75607	1	0.996511	0.962333
Bcat2	O35855	0.24	0.26	-0.35	-0.25	-0.01	-0.05	0.3	-0.17	-0.4	-0.61	0.15	0.04	-0.89	0.05	-0.39	-0.54	0.0425	-0.18	-0.4175	0.843117	0.494946	0.154386	1	0.996511	0.750763
Bccip	Q9CWI3	-4.39	-5.22	-2.1	-3.06	-5.51	-3.99	-3.66	-2.82	-3.34	-1.32	-2.36	-4.6	-2.17	-4.5	-2.25	-3.37	-0.3025	0.7875	0.62	0.707739	0.38586	0.444519	1	0.996511	0.884411
Bckdha	Q3U3J1	0.51	0.32	0.76	0.81	-0.01	0.38	1.06	0.62	0.82	0.6	1.02	0.27	0.94	0.71	0.68	0.94	-0.0875	0.0775	0.2175	0.737242	0.736225	0.294963	1	0.996511	0.825612
Bckdhb	Q6P3A8	-0.52	-0.62	-1.66	-1.36	-0.67	-0.42	-1.45	-2.01	-0.18	-0.97	-1.77	-0.73	-0.1	-0.34	-2.05	-1.33	-0.0975	0.1275	0.085	0.820371	0.757124	0.863778	1	0.996511	0.977235
Bckdk	A0A0U1RNL7	0.19	0.55	-0.15	-0.16	0.26	0.15	-0.49	-0.17	0.89	0.23	0.46	0.11	0.98	1.17	-0.15	-0.08	-0.17	0.315	0.3725	0.503337	0.245775	0.335448	1	0.996511	0.847442
Bcl10	Q9Z0H7	-0.4	0.2	-0.84	-1.47	0.5	-0.61	-0.96	-1.03	-0.46	0.08	-0.61	-0.69	-0.85	-0.24	-1.63	-1.03	0.1025	0.2075	-0.31	0.825123	0.587207	0.479489	1	0.996511	0.893468
Bcl11a	Q5STS9	-0.63	-0.7	-0.57	-0.75	-0.38	0.01	-0.33	-0.57	-0.65	0.16	-0.53	-0.43	0.24	-0.21	-0.09	-0.14	0.345	0.3	0.6125	0.076305	0.197924	0.0093768	1	0.996511	0.563386
Bcl11b	A0A0R4J1E1	-0.15	-0.89	-0.33	-0.42	-1.24	0.17	-0.6	-0.85	1.81	-1.47	-0.95	-0.55	2.48	-1.15	0.61	-0.28	-0.1825	0.1575	0.8625	0.580898	0.815765	0.24922	1	0.996511	0.804842
Bcl2	P10417-2	-1.43	-0.5	-1	-0.84	-0.21	-0.91	-0.44	0.04	-1.07	-1.99	-0.45	-0.97	-1.37	-0.6	-2.1	-0.3	0.5625	-0.1775	-0.15	0.072926	0.627652	0.726143	1	0.996511	0.958398
Bcl2l1	A2AHX9	-0.28	0.07	0.01	-0.07	0.5	-0.22	0.13	-0.09	-0.05	0.44	0.13	0.05	-0.27	0.6	-0.34	-0.06	0.1475	0.21	0.05	0.479288	0.28326	0.8461	1	0.996511	0.976225
Bcl2l13	P59017	1.36	1.01	-0.08	-0.25	0.68	1.43	-0.23	-0.24	1.05	-1.5	-0.03	1.27	1.2	0.56	-0.95	-0.4	-0.1	-0.3125	-0.4075	0.847678	0.647982	0.484068	1	0.996511	0.894252
Bcl7a	Q9CXE2	-0.66	-1.39	-1.03	-1.45	-1.59	-1.27	-1.18	-1.57	-1.47	-0.56	-0.93	-1.14	-1	-0.83	-2.01	-1.45	-0.27	0.1075	-0.19	0.259308	0.699287	0.563374	1	0.996511	0.920024
Bcl7b	Q921K9	-0.92	-1.27	-1.43	-1.36	-1.06	-1.16	-1.11	-1.68	-1	-1.11	-1.31	-1.03	-1.22	-0.77	-1.49	-1.65	-0.0075	0.1325	-0.0375	0.971586	0.491877	0.882918	1	0.996511	0.979767
Bclaf1	Q8K019-2	1.27	-0.09	-0.12	-0.24	-1.05	0.75	-0.62	0.58	0.52	0.11	-0.22	-0.55	2.05	0.01	1	-0.47	-0.29	-0.24	0.4425	0.582532	0.55678	0.472754	1	0.996511	0.891144
Bcr	Q6PAJ1	0.1	-0.11	0.13	0.32	0.08	-0.22	0.36	0.13	0.22	-0.05	0.1	0.02	-0.05	0.17	-0.07	0.04	-0.0225	-0.0375	-0.0875	0.904712	0.831347	0.64012	1	0.996511	0.942804
Bcs1l	Q9CZP5	-0.25	0.22	0.24	0.26	-0.23	-0.19	0.43	0.25	-0.61	0.2	0.29	-0.39	-0.86	-0.7	-0.27	0.14	-0.0525	-0.245	-0.54	0.815984	0.373331	0.0787192	1	0.996511	0.680689
Bdh1	Q80XN0	0.24	-0.09	-0.14	0.08	0	0.44	0.28	0.15	-0.12	-0.58	0.25	0.36	-0.19	-0.21	-0.54	-0.22	0.195	-0.045	-0.3125	0.284563	0.858145	0.133263	1	0.996511	0.728417
Bdnf	H9H9S8	0.75	1.14	1.01	0.96	-0.83	1.24	-1	-0.01	1.13	-0.51	0.2	0.58	1.78	-2.48	0.51	0.81	-1.115	-0.615	-0.81	0.0426842	0.104464	0.342849	1	0.996511	0.848473
Becn1	O88597	0.11	0.32	0.55	0.06	0.14	0.29	0.68	0.27	0.33	0.61	0.35	-0.07	0.45	-0.15	-0.05	0.63	0.085	0.045	-0.04	0.666806	0.836443	0.874105	1	0.996511	0.979626
Begain	F8WIG2	1.45	1.31	1.68	1.47	0.65	1.44	0.61	1.06	1.36	1.42	1.54	1.46	1.36	0.45	1.22	0.76	-0.5375	-0.0325	-0.53	0.0413275	0.845916	0.0629022	1	0.996511	0.66433
Bet1	O35623	-0.58	-0.11	-1.02	-0.94	0.27	0.01	-0.23	-0.59	0.49	-1.6	-0.29	0.23	0.68	1.12	-0.92	-0.48	0.5275	0.37	0.7625	0.0869065	0.445113	0.144675	1	0.996511	0.743156
Bex2	Q9WTZ8	-0.73	0.31	-2.78	-3.96	-0.81	-0.37	-3.99	-2.91	-0.36	-1.57	-2.91	-0.2	-1.3	-0.27	-2.79	-4.05	-0.23	0.53	-0.3125	0.842586	0.611488	0.783626	1	0.996511	0.967642
Bfar	A0A0R4J040	-0.38	0.13	0.1	-0.19	0.8	-0.21	0.62	0.05	-0.21	-0.98	0.02	-0.16	-0.6	0.42	-0.05	0.99	0.4	-0.2475	0.275	0.166722	0.369256	0.447547	1	0.996511	0.884817
Bgn	P28653	-1.48	-1.47	0.74	0.37	-0.56	-1.72	0.05	0.1	-1.67	-1.08	0.49	-0.94	-1.62	-1.07	0.06	1.1	-0.0725	-0.34	0.0775	0.912452	0.619797	0.91913	1	0.996511	0.986868
Bhlhe23	Q8BGW3	1.32	2.16	1.28	0.96	1.74	1.47	0.36	1.2	-0.81	-0.12	1.38	1.73	0.68	1.21	1.9	0.97	-0.2375	-0.885	-0.24	0.530691	0.166801	0.510659	1	0.996511	0.90359
Bicd1	G3UXK5	0.51	0.53	0.88	1.31	0.79	0.31	1.09	0.56	0.53	1.19	0.49	0.43	0.36	1.31	1.26	0.55	-0.12	-0.1475	0.0625	0.645917	0.59226	0.842791	1	0.996511	0.976225
Bicd2	Q921C5	0.61	0.83	0.63	0.52	1.66	0.44	0.75	0.64	1.27	0.77	0.87	0.81	0.95	1.09	0.58	0.83	0.225	0.2825	0.215	0.431761	0.162194	0.290926	1	0.996511	0.825497
Bicra	F8VPZ9	-0.05	0.25	0.38	-0.15	-1.55	-0.79	-1.49	0.11	1.06	1.89	0.67	-0.48	1.85	1.7	0.77	-2.19	-1.0375	0.6775	0.425	0.0236883	0.178502	0.619886	1	0.996511	0.93807
Bicral	Q8CHH5	0.1	0.05	0.26	-0.5	-0.76	-0.18	0.51	0.59	-0.48	0.29	-0.77	-0.1	-0.58	-0.04	-0.21	0.63	0.0625	-0.2425	-0.0275	0.85634	0.41565	0.9296	1	0.996511	0.989687
Bid	P70444	-0.06	0.15	-0.74	-0.39	0.69	-0.19	-0.26	-0.56	-0.64	-0.12	-0.3	0.15	-0.2	1.4	-0.26	-0.43	0.18	0.0325	0.3875	0.581745	0.904485	0.393845	1	0.996744	0.865775
Bin1	O08539	1.31	1.11	0.8	1	0.89	1.29	1	0.68	0.74	0.09	0.78	1.3	0.45	1.09	0.58	0.61	-0.09	-0.3275	-0.3725	0.653205	0.263462	0.123737	1	0.996511	0.721448
Bin2	S4R270	-0.7	-2.15	-1.48	-1.02	-2.61	-0.67	-1.88	-1.07	-0.99	-1.03	-0.99	-1.63	-0.19	-2.53	-1.62	-1.78	-0.22	0.1775	-0.1925	0.657348	0.61005	0.721145	1	0.996511	0.958398
Bin3	Q9JI08	-0.19	0.35	-0.42	-0.22	0.67	0.13	-1.08	-0.65	0.82	0.49	-0.34	0.33	-0.15	0.78	-0.61	-0.85	-0.1125	0.445	-0.0875	0.779059	0.163968	0.820068	1	0.996511	0.972768
Birc2	Q62210	-0.16	-0.41	-0.52	-0.48	-0.26	-0.4	-0.15	-0.43	0.75	0.39	-0.4	0.2	0.38	0.42	-0.28	-0.12	0.0825	0.6275	0.4925	0.615257	0.0423494	0.0619337	1	0.996511	0.662517
Birc6	O88738	-0.56	-0.58	-0.54	-0.49	-0.63	-0.51	-0.6	-0.38	0.08	-0.06	-0.25	-0.46	0.42	-0.39	-0.57	-0.56	0.0125	0.37	0.2675	0.931058	0.0691533	0.324615	1	0.996511	0.842881
Bivm	Q8CBX9	2.83	1.92	-0.52	-0.94	0.84	4.6	-0.31	-0.52	-0.72	-0.78	-0.22	3.03	1.84	-2.48	-0.14	-0.23	0.33	-0.495	-1.075	0.805915	0.670696	0.356988	1	0.996511	0.855416
Bles03	Q8VD62	0	-1.04	-0.82	-0.5	-1.29	0.18	0.29	-0.85	-0.96	-0.37	-0.74	-0.5	-1.06	-0.65	-0.77	-1.12	0.1725	-0.0525	-0.31	0.683108	0.848494	0.277322	1	0.996511	0.822084
Blmh	Q8R016	-0.21	-0.26	-0.06	-0.13	-0.23	-0.37	0.08	0.05	-0.29	-0.04	-0.21	-0.11	-0.41	-0.13	-0.15	-0.12	0.0475	0.0025	-0.0375	0.780756	0.987658	0.832824	1	0.999285	0.975129
Bloc1s1	O55102	-0.72	0.15	0.2	0.5	0.19	-0.3	0.77	0.35	-0.22	0.26	0.5	-0.47	-1.25	0.78	0.32	0.64	0.22	-0.015	0.09	0.514153	0.964635	0.857111	1	0.996755	0.976225
Bloc1s2	Q9CWG9	-0.75	0.08	-0.98	-0.87	-0.13	-0.23	-0.65	-1.16	0.3	-0.5	-1.04	-0.2	0.6	0.05	-0.38	-1.18	0.0875	0.27	0.4025	0.789623	0.461072	0.356961	1	0.996511	0.855416
Bloc1s4	Q8VED2	-0.92	-0.22	-0.61	0.53	0.17	-0.21	-0.04	0.02	1.39	0.71	0.34	-0.5	1.03	0.2	0.39	0.33	0.29	0.79	0.7925	0.371345	0.120923	0.0513331	1	0.996511	0.658454
Blvra	Q9CY64	0.11	-0.14	0.14	-0.07	-0.29	-0.06	-0.02	0.3	-0.74	0	-0.12	0.03	-1.06	-0.44	-0.42	-0.21	-0.0275	-0.2175	-0.5425	0.880253	0.350489	0.0445189	1	0.996511	0.658454
Blvrb	Q923D2	-0.17	-1.61	0.22	1.07	-1.46	0.44	-0.32	1.02	0.67	-0.02	0.15	-1.45	1.71	-0.7	0.09	-0.26	0.0425	-0.04	0.3325	0.951633	0.951382	0.635086	1	0.996755	0.941407
Bmerb1	Q8R1Y2	0.71	1.44	0.91	0.85	1.68	0.72	1.63	0.52	0.86	1.48	1	1.05	1.1	2.17	1.64	1.69	0.16	0.12	0.6725	0.631536	0.615342	0.0417938	1	0.996511	0.658454
Bmp2k	Q91Z96	0.71	0.96	0.35	0.38	0.58	0.92	0.18	0.61	2.66	0.49	0.58	1.02	2.79	1.77	0.78	0.49	-0.0275	0.5875	0.8575	0.904579	0.249637	0.116577	1	0.996511	0.718608
Bmpr1a	Q60607	1.75	1.32	1.09	1.08	1.84	1.42	0.83	1.3	1.12	1.77	0.83	2.19	0.59	0.97	1.48	1.53	0.0375	0.1675	-0.1675	0.888243	0.625469	0.566859	1	0.996511	0.921806
Bmpr1b	P36898	-0.01	0.25	-0.1	0.41	-0.11	0.52	0.12	0.24	-0.18	1.32	0.21	0.96	0.7	0.62	0.45	0.95	0.055	0.44	0.5425	0.789642	0.234661	0.0294154	1	0.996511	0.637553
Bmpr2	O35607	0.3	0.54	0.63	0.65	0.68	0.53	0.37	0.61	0.64	0.78	0.77	0.6	0.33	0.67	0.61	0.56	0.0175	0.1675	0.0125	0.914626	0.338814	0.947107	1	0.996511	0.992376
Bms1	Q6PGF5	1.21	1.15	1.89	1.55	0.97	0.46	1.21	1.34	0.94	1.25	1.51	1.25	0.98	1.52	2.12	1.98	-0.455	-0.2125	0.2	0.114641	0.379835	0.532334	1	0.996511	0.910774
Bmt2	A0A0N4SUJ1	-0.12	-0.14	-0.34	0.04	-0.91	0.33	-1.1	-1.08	0.32	-1.05	-0.75	-0.14	0.89	-0.29	0.05	-0.88	-0.55	-0.265	0.0825	0.13269	0.41384	0.823702	1	0.996511	0.972768
Bnip1	Q6QD59	-0.13	-0.07	-0.33	-0.09	0.29	-0.05	0.38	0.29	-0.1	0.8	-0.24	-0.18	0.02	0.83	0.19	0.3	0.3825	0.225	0.49	0.0454081	0.411568	0.0577438	1	0.996511	0.661738
Bnip2	Q91VL0	0.21	0.12	1.04	1.28	0.14	0.61	1.64	1.55	0.89	0.27	1.21	0.59	0.27	-0.65	0.62	0.71	0.3225	0.0775	-0.425	0.467479	0.82385	0.314391	1	0.996511	0.836924
Bnip3	O55003	0.18	0.14	0.78	0.56	-1.04	0.34	-0.67	0.22	2.42	0.77	0.4	0.41	3.72	-0.5	0.44	-0.22	-0.7025	0.585	0.445	0.075266	0.236603	0.617467	1	0.996511	0.937152
Bnip3l	Q9Z2F7	-0.68	0.78	-0.95	-0.97	0.89	0.25	-0.66	-0.45	-0.77	-1.63	-0.44	-0.26	0.3	0.72	-0.85	-1.19	0.4625	-0.32	0.2	0.370416	0.511904	0.725599	1	0.996511	0.958398
Boc	D3Z763	-2.85	-3.45	-1.51	-1.95	-3.38	-1.74	-2.84	-2.97	-2.44	0.63	-1.62	-2.63	-1.9	-2.02	-1.09	-2.25	-0.2925	0.925	0.625	0.574041	0.257338	0.209559	1	0.996511	0.786218
Bod1	Q5SQY2	-1.32	-2.17	0.19	-1.38	-1.5	-1.25	0.12	-0.7	-2.8	-2.36	-0.47	-1.56	-2.37	-1.99	-0.74	-0.12	0.3375	-0.6275	-0.135	0.549709	0.346561	0.837178	1	0.996511	0.975831
Bod1l	E9Q6J5-2	-2.03	-2.34	-2.8	-3.18	-2.81	-1.66	-3.33	-3.35	0.01	-1.59	-2.97	-2.24	0.15	-2.58	-2.72	-3.43	-0.2	0.89	0.4425	0.65024	0.179374	0.557829	1	0.996511	0.917135
Bok	O35425	0.47	0.3	-1.14	-0.87	-0.48	0.3	-1.33	-0.45	-0.17	-0.09	-1.21	0.17	-0.2	0.47	-1	-1.44	-0.18	-0.015	-0.2325	0.711979	0.974752	0.669941	1	0.997515	0.952558
Bola1	Q9D8S9	1.88	0.68	1.14	1.98	0.4	1.26	1.06	1.61	1.44	1.63	1.16	2.2	0.95	0.85	0.75	0.51	-0.3375	0.1875	-0.655	0.386182	0.613278	0.0721488	1	0.996511	0.668066
Bola2	Q8BGS2	-1.49	-1.36	-0.48	-0.48	-0.76	-1.44	0.11	-0.21	-1.01	0.27	-0.38	-1.03	-0.76	-0.41	-0.04	-0.31	0.3775	0.415	0.5725	0.369719	0.309641	0.0998909	1	0.996511	0.698156
Bola3	E9Q705	1.35	0.63	-0.79	-1.19	-0.41	1.14	-1.31	-1.31	1.94	-1.42	-0.75	1.38	1.96	1.09	-0.84	-0.92	-0.4725	0.2875	0.3225	0.533406	0.75182	0.701526	1	0.996511	0.956791
Bop1	P97452	0.2	0.56	1.02	0.33	0.4	-0.21	0.75	0.01	0.27	0.68	0.96	0.36	0.92	0.1	0.47	1.19	-0.29	0.04	0.1425	0.31768	0.877286	0.648166	1	0.996511	0.945938
Borcs5	E9Q2W8	0.09	0.33	0.76	0.68	0.39	0.09	0.77	0.66	0.07	1.3	0.61	0.14	0.56	0.28	0.71	0.87	0.0125	0.065	0.14	0.957564	0.840542	0.562487	1	0.996511	0.920024
Borcs6	Q9D6W8	-0.37	0.04	-0.28	-0.14	-0.03	-0.5	-0.33	0.12	-0.05	1.34	-0.44	-0.36	-0.2	0.07	-0.28	-0.25	0.0025	0.31	0.0225	0.990005	0.451474	0.907377	1	0.996511	0.986458
Borcs7	Q9CRC6	0.06	0.04	-0.08	0.87	0.81	-0.32	0.37	0.66	-0.26	1.46	0.64	0.12	-0.05	1.49	0.46	0.74	0.1575	0.2675	0.4375	0.629105	0.52007	0.266312	1	0.996511	0.818107
Borcs8	Q9D6Y4	-0.05	0.46	0.69	0.72	0.56	-0.37	1.14	0.89	-1.09	1.04	0.71	0.05	-0.03	0.2	0.75	0.73	0.1	-0.2775	-0.0425	0.781094	0.559112	0.88068	1	0.996511	0.979767
Bpgm	P15327	2.48	0.07	0.63	1.15	0.14	3.34	0.39	1.08	1.52	0.11	0.01	1.28	1.34	0.79	0.09	0.25	0.155	-0.3525	-0.465	0.847249	0.556379	0.402519	1	0.996511	0.870698
Bphl	Q8R164	1.18	1.01	1.95	1.38	0.79	1.06	2.19	1.96	0.02	0.65	1.82	0.87	-0.42	0.11	1.47	2.09	0.12	-0.54	-0.5675	0.750741	0.206288	0.332364	1	0.996511	0.845601
Bpnt1	Q9Z0S1	0.01	0.6	0.35	0.35	1.01	0.87	0.5	0.43	1.16	0.06	0.34	1.62	1.03	-2.86	0.02	-0.71	0.375	0.4675	-0.9575	0.105386	0.226629	0.224997	1	0.996511	0.787447
Bpnt1	A0A1B0GRV0	-0.65	-0.79	-0.48	-0.58	-0.99	-0.47	-0.38	-0.3	-0.68	-0.57	-0.37	-0.72	0.04	-1.45	-0.28	-0.83	0.09	0.04	-0.005	0.656218	0.818696	0.988089	1	0.996511	0.996154
Bpnt2	Q80V26	-1.5	-3.21	-2.29	-2.07	-1.59	-1.04	-0.91	-2.24	-3.61	-2.81	-2.18	-1.67	-2.81	-2.55	-1.01	-1.79	0.8225	-0.3	0.2275	0.0870983	0.560096	0.652638	1	0.996511	0.947633
Bptf	A2A654	-0.62	-1.65	-0.04	0.03	-1.83	-0.58	-0.19	0.25	-0.27	0.79	0.19	-1.29	0.88	-2.33	0.55	0.16	-0.0175	0.425	0.385	0.974283	0.440801	0.609123	1	0.996511	0.934202
Braf	P28028-1	-0.25	-0.15	-0.34	-0.42	-0.4	-0.22	-0.17	-0.56	-0.59	-0.64	-0.55	-0.24	-0.71	-1.14	-0.77	-0.96	-0.0475	-0.215	-0.605	0.772976	0.244484	0.0107597	1	0.996511	0.563386
Braf	P28028	-0.97	0.49	0.13	0.42	-0.14	-0.66	0.49	0.21	0.57	0.65	0.21	-0.17	-0.09	0.86	-0.05	0.05	-0.0425	0.2975	0.175	0.914455	0.435175	0.657604	1	0.996511	0.948659
Brap	Q99MP8	-0.95	-0.7	-0.81	-1.21	-0.77	-0.82	-1.03	-1.37	-0.6	-0.31	-1.21	-0.86	-0.31	-0.77	-1.17	-1.25	-0.08	0.1725	0.0425	0.698104	0.48915	0.873819	1	0.996511	0.979626
Brat1	E9QLK3	-0.97	-0.95	-0.71	-0.46	-0.81	-1.54	-0.76	-1.26	-0.65	-0.34	-0.88	-1.16	-0.78	-1.13	-1.34	-1.04	-0.32	0.015	-0.3	0.202242	0.949927	0.193495	1	0.996755	0.777907
Brawnin	Q8BTC1	1.73	1.59	2.41	2.44	1.28	1.58	1.98	2.38	0.96	1.74	1.7	1.1	0.65	1.36	1.2	1.47	-0.2375	-0.6675	-0.8725	0.465014	0.0531685	0.0165968	1	0.996511	0.591538
Brcc3	P46737	-1.23	-1.65	-1.45	-1.07	-1.17	-1.12	-1	-1.22	-1.93	-1	-1.11	-1.11	-1.88	-1.12	-1.61	-1.13	0.2225	0.0625	-0.085	0.237685	0.814997	0.741113	1	0.996511	0.958796
Brd1	G5E8P1	1.34	0.99	1.79	1.53	0.52	1.52	1.3	1.35	0.7	-2.34	1.35	0.74	1.91	-2.35	1.82	2.07	-0.24	-1.3	-0.55	0.40423	0.118073	0.574747	1	0.996511	0.926139
Brd2	Q7JJ13	1.6	1.61	1.09	0.81	-2.17	1.18	0.65	0.92	3.03	0.37	0.67	0.12	2.8	0.49	1.46	1	-1.1325	-0.23	0.16	0.14606	0.719415	0.748331	1	0.996511	0.960744
Brd3	Q8K2F0	1.28	-0.19	0.71	1.12	-1.53	0.78	0.8	0.54	1.04	1.14	0.66	0.62	1.15	-1.26	1.4	1.11	-0.5825	0.135	-0.13	0.341041	0.699136	0.839758	1	0.996511	0.976219
Brd4	Q3UH70	1.01	0.04	-0.48	-0.29	-0.04	0.2	-0.46	-0.34	-0.39	-0.01	-0.65	0.05	0.2	0.16	0.38	-0.51	-0.23	-0.32	-0.0125	0.515641	0.385853	0.97341	1	0.996511	0.992946
Brd7	O88665	0.38	0.4	0.78	1.94	0.57	0.4	0.56	1.56	-0.07	1.69	0.5	0.54	0.24	-0.19	1.41	0.74	-0.1025	-0.21	-0.325	0.809115	0.666723	0.497102	1	0.996511	0.897918
Brd8	Q8R3B7-2	-2.27	-2.04	-1.6	-2.34	-3.48	-1.62	-2.51	-1.98	-0.51	-0.71	-2.04	-2.62	0.21	-3.78	-1.57	-1.8	-0.335	0.5925	0.3275	0.424505	0.256291	0.665143	1	0.996511	0.949825
Brd9	A0A1Y7VJ63	-0.34	-2.11	-0.94	-2.14	-2.05	-1.14	-0.97	-0.59	-0.93	-0.17	-1.47	-2.62	0.55	-0.14	-0.82	-0.51	0.195	0.085	1.1525	0.698047	0.891449	0.0434147	1	0.996511	0.658454
Bri3bp	Q8BXV2	1.2	-0.64	-0.08	-2.02	0.11	1.71	1.35	-0.06	-2.02	-0.66	-0.28	1.02	-1.08	-1.26	1.2	1.46	1.1625	-0.1	0.465	0.135567	0.903576	0.601809	1	0.996609	0.930802
Brinp1	Q920P3	0.76	0.53	1.32	0.73	0.81	1.18	1.41	1.18	0.13	0.55	1.5	1.05	-0.13	0.1	0.81	1.23	0.31	-0.0275	-0.3325	0.200362	0.935154	0.359734	1	0.996755	0.856645
Brinp2	Q6DFY8	0.45	0.81	1.31	0.6	0.78	0.6	0.86	0.9	0.41	-0.19	1.21	0.87	0.12	0.45	0.4	0.6	-0.0075	-0.2175	-0.4	0.973001	0.538261	0.132991	1	0.996511	0.728417
Brinp3	Q499E0	1.04	1.2	0.92	0.79	1.27	1.11	0.91	1.15	0.52	-0.94	0.84	1.26	1.17	0.25	0.45	1.07	0.1225	-0.5675	-0.2525	0.475017	0.23462	0.359314	1	0.996511	0.856645
Brix1	Q9DCA5	0.7	-0.06	0.38	-0.73	-0.29	0.9	0.35	-0.53	2.94	-1.94	-0.29	-0.33	4.84	-0.01	-0.74	0.3	0.035	0.0225	1.025	0.933443	0.981307	0.388662	1	0.998773	0.86481
Brk1	Q91VR8	2.12	0.47	1.37	0.32	0.7	2.31	1.38	1.51	0.85	0.07	1.73	2.11	0.01	-0.62	2.66	1.03	0.405	0.12	-0.3	0.420948	0.833578	0.69036	1	0.996511	0.955729
Brms1l	Q3U1T3	-1.52	-1.24	1.04	1.14	-1.28	-0.67	0.89	1.42	-0.5	-0.7	0.99	-0.69	-1.68	-0.85	0.46	0.47	0.235	-0.08	-0.255	0.785421	0.914598	0.750756	1	0.996755	0.961479
Brox	Q8K2Q7	-0.95	-0.8	-0.33	-0.76	-0.99	-0.86	-1.23	-0.65	-0.13	-0.63	-0.73	-0.61	0.13	-0.53	-0.76	-1.19	-0.2225	0.185	0.1225	0.302717	0.418597	0.697758	1	0.996511	0.955729
Brpf1	A0A0N4SUS4	6.04	5.17	5.28	3.17	5.33	5.49	3.85	3.75	1.22	1.6	4.63	5.26	1.36	1.3	4.97	5.78	-0.31	-1.7375	-1.5625	0.658498	0.133699	0.209599	1	0.996511	0.786218
Brsk1	Q5RJI5	1.06	0.77	0.87	0.55	0.69	1.05	0.93	0.84	0.6	0.7	0.92	1.23	0.77	0.6	0.76	0.69	0.065	0.05	-0.1075	0.715051	0.81645	0.575602	1	0.996511	0.926728
Brsk2	G3UWV4	-0.11	0.28	0.25	0.83	-0.56	-0.48	-0.42	0.48	0.63	1.05	0.21	-0.3	1.6	0.46	0.44	-0.4	-0.5575	0.085	0.2125	0.097337	0.804207	0.624978	1	0.996511	0.939167
Brsk2	Q69Z98	0.03	0.59	0.92	0.79	0.7	0.46	0.5	0.79	0.4	1.08	0.79	0.02	0.53	0.7	0.49	0.6	0.03	-0.01	-0.0025	0.896499	0.973983	0.991691	1	0.997515	0.996154
Brwd1	Q921C3	1.09	1.82	1.52	1.25	1.51	1.03	-0.85	0.62	2.63	-1.66	1.65	1.75	2.65	2.11	0.88	2.18	-0.8425	-0.3275	0.535	0.115346	0.705363	0.200234	1	0.996511	0.78004
Bscl2	A0A0R4J225	0.51	0.86	-0.22	-0.74	1.34	1.32	0.37	-0.6	0.04	-1.03	-0.38	1.04	1.27	0.09	0.17	0.72	0.505	-0.185	0.46	0.359974	0.723965	0.30151	1	0.996511	0.830308
Bsdc1	Q80Y55	0.13	0.41	0.17	-0.15	0.36	0.4	-0.11	-0.16	0.98	-0.22	0.28	0.41	1.38	0.31	0.25	0.02	-0.0175	0.2225	0.35	0.934859	0.440314	0.302147	1	0.996511	0.830699
Bsg	K3W4Q8	0.32	0.27	0.47	0.35	-0.09	0.73	0.56	0.23	1.47	1.13	0.62	0.42	2.2	0.55	0.92	0.26	0.005	0.5575	0.63	0.981268	0.0583489	0.152372	1	0.996511	0.750422
Bsn	O88737	1.38	1.1	1.24	1.24	0.95	1.27	0.75	1	1.27	0.88	1.2	1.3	1.41	0.95	1.03	0.84	-0.2475	-0.0775	-0.1825	0.175831	0.666996	0.377063	1	0.996511	0.860984
Btaf1	E9QAE3	-0.63	-0.37	-0.43	-0.67	0.25	-1.18	-0.72	-1.15	-0.55	0.88	-0.56	-0.56	-1.39	-0.66	-0.99	-0.48	-0.175	0.3275	-0.355	0.600672	0.371801	0.17675	1	0.996511	0.771503
Btbd1	P58544	-1.71	-1	0.64	-0.89	-0.73	-0.78	0.47	-0.51	2.3	-0.67	0.07	-1.07	2.58	0.11	-0.24	0.17	0.3525	0.8975	1.395	0.509696	0.287227	0.0857984	1	0.996511	0.691619
Btbd10	E9Q6L8	-0.18	0.62	1.05	0.58	0.15	-0.12	0.25	0.81	0.96	1.06	0.64	0.46	1.29	1.15	0.73	0.22	-0.245	0.2625	0.33	0.445817	0.38895	0.357002	1	0.996511	0.855416
Btbd11	Q6GQW0	0.76	0.94	1.03	0.97	1.21	0.79	0.85	1	0.83	1.25	0.95	0.68	0.17	1	0.21	0.9	0.0375	0.0025	-0.355	0.821696	0.989528	0.192243	1	0.999285	0.77733
Btbd17	Q9DB72	-0.54	-0.19	-0.12	-0.13	0.22	-0.52	0.31	-0.17	-0.4	-0.71	-0.29	-0.31	-0.86	0.07	-0.55	-0.6	0.205	-0.1825	-0.24	0.390645	0.358173	0.355562	1	0.996511	0.855029
Btbd8	Q3TEG0	0.14	0.03	0.37	0.58	0	-0.15	-0.33	-0.08	-1.4	-1.41	0.03	0.76	-0.46	-0.87	0.06	0.42	-0.42	-0.785	-0.4925	0.0455129	0.153151	0.146238	1	0.996511	0.746406
Btbd9	Q8C726	-1.26	-0.74	-1.78	-2.21	-0.69	-1.47	-1.77	-2.75	-0.14	0.45	-2.15	-1.01	-0.04	1.45	-2.3	-2.47	-0.1725	0.785	0.6575	0.726275	0.209929	0.4688	1	0.996511	0.8901
Btd	A0A0R4J131	0.43	0.74	-4.11	-3.94	0.54	0.58	-4.06	-4.87	0.13	-0.65	-4.3	1	0.37	0.02	-2.37	-3.58	-0.2325	0.765	0.33	0.895014	0.630412	0.820564	1	0.996511	0.972768
Btf3	Q64152	-4.33	-4.66	-3.15	-3.32	-4.17	-4.82	-3.2	-3.22	-3.54	-1.9	-3.31	-4.18	-3.07	-3.77	-3.12	-3.7	0.0125	0.6325	0.45	0.980018	0.27655	0.278694	1	0.996511	0.822084
Btf3l4	Q9CQH7	-4	-4.24	-3.22	-3.53	-3.57	-4.48	-3.57	-3.83	-4.11	-1.52	-3.57	-3.51	-4.14	-3.09	-3.37	-3.83	-0.115	0.57	0.14	0.711212	0.32737	0.673617	1	0.996511	0.952944
Bub3	A0A140LHA2	-5.47	-6.42	-4.81	-6.04	-6.14	-6.25	-5.91	-5.46	-5.9	-3.67	-5.01	-5.2	-4.12	-5.35	-4.46	-5.59	-0.255	0.74	0.805	0.50042	0.193691	0.112085	1	0.996511	0.713445
Bud13	Q8R149	-1.36	-2.2	-0.67	-0.45	-1.27	-1.6	0.04	0.43	-1.16	-0.87	-0.36	-1	-0.14	0.77	-0.1	0.65	0.57	0.3225	1.465	0.337344	0.440003	0.00839771	1	0.996511	0.563386
Bud31	Q6PGH1	-1.4	-1.55	-1.82	-1.83	-1.82	-1.39	-1.85	-1.3	-0.06	-3.09	-1.89	-1.74	0.12	-1	-2.17	-2.75	0.06	-0.045	0.2	0.772319	0.93817	0.7364	1	0.996755	0.958635
Bysl	O54825	-1.11	-1.56	-0.15	-0.85	-1.52	-1.73	-1.34	-0.8	-2.95	-2.98	-0.53	-1.25	-2.93	-4.09	-1.58	-0.88	-0.43	-1.01	-1.4525	0.231633	0.133419	0.0639967	1	0.996511	0.66433
Bzw1	A0A087WQS2	-1.63	-1.94	-2.32	-2.34	-2.01	-1.9	-2.63	-2.68	-2.11	-1.4	-2.48	-1.69	-1.81	-1.63	-2.89	-3.28	-0.2475	0.1375	-0.345	0.372354	0.646232	0.419212	1	0.996511	0.87558
Bzw2	Q91VK1	-1.79	-1.99	-1.38	-1.39	-1.58	-1.75	-1.18	-1.12	-2.13	-0.82	-1.26	-1.85	-1.5	-1.15	-1.52	-1.63	0.23	0.1225	0.1875	0.338395	0.710512	0.421903	1	0.996511	0.875736
C030006K11Rik	Q8VE95	2.93	1.21	0.71	1.21	0.52	2.48	0.31	1.17	0.79	1.82	1.02	2.05	0.69	1.05	0.21	-0.14	-0.395	-0.095	-1.0625	0.533688	0.857932	0.064355	1	0.996511	0.66433
C1qa	P98086	-3.88	-5.07	-3.67	-3.52	-4.13	-4.08	-2.58	-3.47	-3.8	-2.14	-3.92	-3.61	-3.1	-3.51	-2.74	-3.35	0.47	0.6675	0.86	0.329966	0.209427	0.0471293	1	0.996511	0.658454
C1qb	P14106	-3.11	-3.38	-2.18	-1.34	-2.7	-3.62	-1.14	-1.87	-4.47	-0.77	-1.45	-2.75	-2.99	-3.43	-1.19	-0.93	0.17	0.1425	0.3675	0.791999	0.866266	0.607029	1	0.996511	0.932961
C1qbp	Q8R5L1	0.42	0.34	0.77	1.76	-0.13	0.24	0.88	1.55	0.13	0.57	0.94	0.4	-1.23	0.07	0.15	0.34	-0.1875	-0.3125	-0.99	0.683571	0.394003	0.0550865	1	0.996511	0.661738
C1qc	Q02105	-2.38	-3.47	-4.21	-3.53	-3.06	-2.55	-3.31	-3.88	-2.58	-2.45	-3.82	-2.46	-2.31	-2.85	-2.99	-3.66	0.1975	0.57	0.445	0.653402	0.246506	0.330978	1	0.996511	0.845601
C1ql3	Q9ESN4	0.15	0.6	0.47	0.35	0.66	0.45	0.94	0.57	0.15	-0.18	0.25	0.59	0.21	0.81	0.38	0.44	0.2625	-0.19	0.0675	0.178268	0.40142	0.752806	1	0.996511	0.961479
C1qtnf4	Q8R066	0.43	0.45	0.18	0.32	0.71	0.52	0.59	0.52	-0.12	1.16	0.1	0.67	0.11	-0.07	0.85	0.77	0.24	0.1075	0.07	0.138302	0.721685	0.792676	1	0.996511	0.96933
C2cd2	E9Q3C1	0.27	0.39	0.46	0.26	0.64	0.56	0.14	0.17	0.57	-0.45	0.12	0.39	1.56	0.79	0.75	0.58	0.0325	-0.1875	0.575	0.858334	0.462028	0.0473415	1	0.996511	0.658454
C2cd2l	Q80X80	0.35	0.01	0.08	0.32	-0.1	0.16	0.6	0.38	0.13	0.16	0.04	0.36	0.66	0.45	0.54	0.34	0.07	-0.0175	0.3075	0.731643	0.921428	0.12943	1	0.996755	0.723655
C2cd4c	Q5HZI2	-0.14	0.15	0.5	0.4	-0.02	-0.22	0.44	0.24	0.77	0.43	0.64	0.32	1.06	0.69	0.61	0.61	-0.1175	0.3125	0.515	0.604133	0.171537	0.0456063	1	0.996511	0.658454
C2cd5	Q7TPS5	1.63	2.17	1.23	1.9	5.79	0.2	0.09	0.73	5.68	2	1.41	2.98	3	3.15	3.12	1.19	-0.03	1.285	0.8825	0.980647	0.165667	0.095507	1	0.996511	0.698156
C2cd5	A0A0N4SW93	0.65	0.73	0.87	0.71	0.86	0.57	0.91	0.81	0.37	0.6	0.66	0.64	0.47	0.47	0.69	0.99	0.0475	-0.1725	-0.085	0.760999	0.313667	0.671161	1	0.996511	0.952631
C3	P01027	-3.81	-4.8	-3.86	-4.47	-3.4	-4.48	-3.28	-4.09	-4.64	-2.17	-3.9	-3.62	-4.07	-3.53	-4.26	-4.23	0.4225	0.6525	0.2125	0.256939	0.237651	0.492837	1	0.996511	0.897531
C4b	P01029	-1.07	-0.8	-0.57	-0.2	-0.48	-1.03	0.28	-0.08	-0.63	1.16	-0.22	0.07	-1.16	0.36	-1.07	0.35	0.3325	0.755	0.28	0.324265	0.0902943	0.528634	1	0.996511	0.908663
C9orf72	Q6DFW0	-0.95	-0.55	0.67	0.7	-0.43	-0.7	0.94	0.13	-0.47	0.96	0.67	-0.99	-0.49	-1.54	0.29	0.23	0.0175	0.075	-0.345	0.972721	0.896269	0.537592	1	0.996511	0.912212
Ca1	P13634	0.72	-0.94	0.8	2	-0.61	1.7	0.43	2.37	-1.16	-1.14	-0.45	-1.64	0.03	-0.81	-0.71	-0.79	0.3275	-1.7425	-1.215	0.686776	0.0165728	0.0634522	1	0.996511	0.66433
Ca10	P61215	0.7	1.14	0.81	1.18	0.7	1.06	0.38	1.27	1.27	2.05	1.28	1.12	1.24	0.25	0.51	0.46	-0.105	0.4725	-0.3425	0.668639	0.0973788	0.227181	1	0.996511	0.787447
Ca11	O70354	2.67	1.05	0.6	0.39	0.7	2.8	0.7	0.08	1.24	0	0.5	2.19	1.34	0.83	-0.08	0.02	-0.1075	-0.195	-0.65	0.880096	0.761522	0.271002	1	0.996511	0.822084
Ca14	Q9WVT6	1.87	1.31	1.54	0.99	0.98	1.21	1.18	0.63	0.94	0.11	0.63	1.26	-0.06	0.21	0.84	0.89	-0.4275	-0.6925	-0.9575	0.10641	0.0496399	0.0122255	1	0.996511	0.571403
Ca2	P00920	1.2	0.17	0.76	1.13	0.54	1.44	1.32	1.55	-0.5	-1.1	0.86	0.31	-0.71	-0.23	0.48	0.59	0.3975	-0.9225	-0.7825	0.236712	0.0728697	0.0639942	1	0.996511	0.66433
Ca4	Q64444	0.88	1.14	1.88	1.57	0.91	0.98	1.5	1.63	0.62	1.54	1.91	1.06	0.04	0.4	1.03	1.85	-0.1125	-0.085	-0.5375	0.696999	0.808797	0.234733	1	0.996511	0.791172
Ca5b	Q9QZA0	0.55	0.56	-0.1	0.12	0.14	0.88	0.12	-0.19	1	-0.91	0.16	1.11	0.73	0.76	-0.5	-0.73	-0.045	0.0575	-0.2175	0.873294	0.901369	0.59915	1	0.996609	0.930565
Ca7	Q9ERQ8	1.19	0.8	0.96	1.11	0.94	0.44	-0.05	1.18	1.2	0.75	0.45	0.7	0.06	1.69	0.05	0.14	-0.3875	-0.24	-0.53	0.201171	0.286315	0.204793	1	0.996511	0.783452
Ca8	P28651	-0.67	-0.45	0.15	-0.12	0.35	-0.53	0.09	0.25	0.08	0.35	-0.17	-0.53	-0.02	0.7	-0.03	0.32	0.3125	0.205	0.515	0.270143	0.462111	0.0865639	1	0.996511	0.691619
Caap1	Q8VDY9	-2.31	-2.3	0.84	2.96	-3.25	-2.75	-3.43	1.6	-0.85	0.54	0.46	-1.61	-2.48	-1.22	-0.74	0.24	-1.755	-0.1625	-0.8475	0.280879	0.896072	0.504368	1	0.996511	0.901002
Cab39	Q06138	0.43	-0.18	0.36	0.5	0.06	0.51	0.06	0.92	-0.24	-0.22	0.33	0.32	-0.47	-0.26	0.25	-0.04	0.11	-0.23	-0.4075	0.680124	0.364864	0.132089	1	0.996511	0.726871
Cab39l	Q9DB16	-0.29	-0.14	-1.05	-1.11	-0.59	-0.73	-1.43	-1.21	-1.24	-0.71	-1.39	-0.5	-0.9	-0.32	-1.4	-0.97	-0.3425	-0.3125	-0.25	0.292947	0.352982	0.465372	1	0.996511	0.888369
Cabin1	G3X8Q1	-0.05	0.16	-0.54	-0.17	-0.78	0.19	-1.41	-0.67	0.86	-0.19	-0.27	0.2	1.81	-0.96	-0.12	-0.96	-0.5175	0.3	0.0925	0.161733	0.334842	0.879924	1	0.996511	0.979626
Cables1	Q3U148	1.3	0.93	0.61	0.74	1.28	0.82	0.31	0.5	0.93	0.77	0.45	1.29	0.43	0.5	0.19	0.59	-0.1675	-0.035	-0.4675	0.534613	0.889726	0.0608169	1	0.996511	0.661738
Cables2	Q8K3M5	-0.23	-0.27	-0.06	0.18	-0.05	-0.26	1.3	0.11	-0.66	0.11	0.36	0	-0.41	-0.64	1.13	0.7	0.37	0.0475	0.29	0.307171	0.854962	0.495883	1	0.996511	0.89758
Cabp1	D3Z1M4	-1.82	-1.08	-0.97	-2.1	-0.59	-0.99	-1.05	-1.44	0.72	-1.29	-0.8	-1.34	1.81	-0.88	-0.24	-1.35	0.475	0.815	1.3275	0.163229	0.140544	0.0781763	1	0.996511	0.677244
Cacfd1	A6PWX1	-0.04	0.33	0.37	0.21	1.31	1.61	0.79	0.87	0.53	0.28	0.13	0.87	1.36	-0.17	0.4	1.1	0.9275	0.235	0.455	0.00319117	0.306432	0.221263	1	0.996511	0.787447
Cachd1	Z4YK18	-0.69	0.46	0.09	0.04	0.82	-0.3	0.79	0.27	-0.23	0.48	0.19	-0.8	-0.06	1	0.36	0.89	0.42	-0.065	0.5725	0.243023	0.856096	0.122761	1	0.996511	0.721448
Cacna1a	A0A571BET0	0.8	0.9	1.02	0.84	0.83	1.02	0.58	0.73	0.79	0.32	0.93	0.66	1.08	0.26	0.71	0.77	-0.1	-0.215	-0.185	0.544357	0.283815	0.418254	1	0.996511	0.87558
Cacna1a	A0A571BE75	-0.49	-0.68	1.08	1.49	0.13	-1.23	1.1	0.89	-1.11	0.48	1.6	-0.77	-2.22	0	1.15	1.96	-0.1275	-0.3	-0.1275	0.853162	0.690123	0.893165	1	0.996511	0.982875
Cacna1b	O55017-2	1.23	1.2	1.52	1.39	1.1	1.37	1.3	1.54	1.24	1.23	1.65	1.31	1.47	0.57	1.92	1.51	-0.0075	0.0225	0.0325	0.964829	0.903261	0.915192	1	0.996609	0.986556
Cacna1c	A0A087WR02	1.67	1.69	0.97	0.89	1.63	1.43	0.78	0.72	1.41	0.36	0.99	1.44	1.68	1.68	0.48	0.64	-0.165	-0.255	-0.185	0.598316	0.448154	0.629048	1	0.996511	0.940595
Cacna1d	A0A589Q4M7	0.51	0.2	0.58	1.18	0.34	0.34	0.1	0.23	0.49	0.77	0.68	0.73	0.03	1.07	0.43	0.5	-0.365	0.05	-0.11	0.141588	0.835757	0.720957	1	0.996511	0.958398
Cacna1e	A0A087WS83	0.99	1.21	1.01	0.83	1.05	0.86	0.85	0.75	0.68	0.69	1	0.92	0.77	0.84	0.86	0.55	-0.1325	-0.1875	-0.255	0.420361	0.311492	0.195558	1	0.996511	0.78004
Cacna1e	A0A571BF18	0.72	0.44	1.79	1.54	-0.35	0.23	0.48	0.97	0.88	1.56	0.88	0.34	1.7	-1.85	2.01	1.39	-0.79	-0.2075	-0.31	0.0750479	0.598853	0.718168	1	0.996511	0.958398
Cacna1g	Q5SUG2	0.25	0.31	0.52	1.08	0.08	1.66	0.24	0.77	1.83	0.22	0.22	0.1	3.2	0.34	1.02	0.8	0.1475	0.0525	0.8	0.700805	0.902786	0.210271	1	0.996609	0.786218
Cacna1h	E9Q6P9	-0.24	-0.36	0.06	0.82	-0.07	-0.31	-0.33	0.63	-0.27	2.62	0.32	-0.09	1.29	-0.26	1.3	0.12	-0.09	0.575	0.5425	0.789334	0.392249	0.251921	1	0.996511	0.80892
Cacna1i	E9Q7P2	0.41	0.97	0.95	0.87	0.58	0.72	0.07	0.4	1.48	0.71	0.88	0.73	1.57	0.75	0.62	0.35	-0.3575	0.15	0.0225	0.127136	0.549206	0.941179	1	0.996511	0.991085
Cacna2d1	O08532-5	1.12	1.44	1.24	1.28	1.31	0.96	1.3	1.14	0.75	0.8	1.22	1.25	0.24	1.22	0.81	0.81	-0.0925	-0.265	-0.5	0.57608	0.205882	0.0691911	1	0.996511	0.667373
Cacna2d2	E9Q683	1.29	0.84	0.67	1.11	0.8	0.85	1.27	0.8	0.17	0.44	0.49	1.29	-0.37	-0.21	1.13	0.96	-0.0475	-0.38	-0.6	0.819457	0.209212	0.157233	1	0.996511	0.751678
Cacna2d3	Q9Z1L5	0.67	0.6	1.19	0.92	0.49	0.71	1.75	1.14	0.25	0.14	1.17	0.79	-0.02	0.1	1.06	1.24	0.1775	-0.2575	-0.25	0.563975	0.378893	0.479372	1	0.996511	0.893468
Cacnb1	Q8R3Z5-3	-0.1	-0.76	-0.02	0.76	0.32	0.17	-0.63	0.5	1.19	1.99	0.44	0.14	1.66	0.93	0.65	0.67	0.12	0.97	1.0075	0.751877	0.0715022	0.0251095	1	0.996511	0.633075
Cacnb1	A2A543	1.34	1.21	1.34	1.62	1.45	1.27	1.87	1.84	1.01	1.3	1.89	1.57	1.05	0.59	1.79	1.71	0.23	0.065	-0.0925	0.274646	0.783412	0.764366	1	0.996511	0.964134
Cacnb2	Q8CC27	0.83	0.63	0.75	1.6	0.67	0.68	0.58	1.16	0.64	0.9	0.64	0.61	0.59	0.06	1.21	1.25	-0.18	-0.255	-0.175	0.500552	0.326753	0.623898	1	0.996511	0.938628
Cacnb3	P54285	1.37	0.9	0.62	0.7	1.08	1.1	0.41	0.52	0.76	0.37	0.7	1.33	0.71	0.95	0.64	0.41	-0.12	-0.1075	-0.22	0.642967	0.696717	0.371667	1	0.996511	0.859424
Cacnb4	Q8R0S4	0.87	0.56	1.36	1.4	0.52	0.81	1.38	1.38	0.89	0.9	1.5	0.68	0.91	0.6	1.28	1.29	-0.025	-0.055	-0.0275	0.932219	0.84459	0.922088	1	0.996511	0.987447
Cacng2	O88602	1.42	1.08	1.36	1.63	1.36	1.33	1.2	1.75	0.39	0.93	1.91	1.29	0.43	0.31	0.91	0.87	0.0375	-0.2425	-0.7425	0.849855	0.476121	0.0105436	1	0.996511	0.563386
Cacng3	Q9JJV5	2.66	0.17	4.07	1.15	0.72	2.57	4.84	3.15	-0.46	0.62	4.12	1.76	-1.02	-1.36	4.47	4.94	0.8075	-0.5025	-0.255	0.462339	0.668084	0.880202	1	0.996511	0.979626
Cacng4	Q9JJV4	0.79	0.35	0.7	1.1	-0.25	-0.75	1.14	0.84	0.09	0.48	1.03	0.46	-0.24	-0.38	0.79	1.15	-0.49	-0.22	-0.405	0.283603	0.416022	0.319621	1	0.996511	0.838969
Cacng7	P62956	-0.35	0.01	0.84	0.3	0.94	0.98	1.21	0.31	-0.58	-0.57	1.16	0.15	-0.32	-0.18	0.81	0.87	0.66	-0.16	0.095	0.059823	0.724429	0.808254	1	0.996511	0.971953
Cacng8	S4R2F1	0.89	0.26	0.66	1.3	0.16	0.99	0.79	1.09	1.01	0.49	0.76	1	1.64	-0.21	1.27	0.95	-0.02	0.0375	0.135	0.946663	0.888068	0.755557	1	0.996511	0.962333
Cactin	Q9CS00	-0.7	-0.32	1.05	1.61	-0.28	-0.03	0.4	2	-0.49	0.2	1.41	-0.73	-1.2	-0.22	0.57	1.7	0.1125	-0.3125	-0.1975	0.86869	0.640117	0.791043	1	0.996511	0.969105
Cacul1	E9PV69	-0.15	-0.55	-2.64	-1.76	-0.98	-0.51	-3.32	-1.88	-0.73	0.15	-0.92	-0.11	-0.29	-0.96	-1.29	-2.73	-0.3975	0.8725	-0.0425	0.603353	0.154001	0.951289	1	0.996511	0.992476
Cacybp	Q9CXW3	-0.11	-0.4	-1.98	-2.09	-0.06	-0.44	-1.59	-1.83	-1.59	-2.04	-1.76	-0.1	-1.27	-1.18	-2.02	-1.99	0.165	-0.2275	-0.47	0.788332	0.713802	0.381041	1	0.996511	0.860984
Cad	E9QAI5	0.34	0.01	-0.33	-0.24	0.32	0.36	0.05	-0.18	0.31	-0.03	-0.23	0.38	-0.06	0.68	-0.25	-0.13	0.1925	0.1625	0.115	0.391782	0.498464	0.681722	1	0.996511	0.955729
Cadm1	E0CY16	-0.06	0.49	0.59	0.65	0.17	0.8	1.29	0.8	0.63	0.2	0.25	-0.39	-0.33	0.65	-0.12	-0.55	0.3475	-0.245	-0.505	0.240595	0.390223	0.136033	1	0.996511	0.731656
Cadm1	Q8R5M8-4	0.72	0.53	-0.38	-0.13	0.06	0.68	-0.2	-0.12	0.53	0.28	-0.48	0.84	-0.02	0.07	-0.37	-0.61	-0.08	0.1075	-0.4175	0.803691	0.77318	0.206378	1	0.996511	0.785338
Cadm2	G3UZM4	0.91	0.62	1.35	1.76	0.25	1.05	0.3	1.26	1.22	1.77	0.93	1.03	0.73	0.43	0.25	0.63	-0.445	0.0775	-0.65	0.220487	0.805403	0.0478869	1	0.996511	0.658454
Cadm3	K4DI58	0.68	0.54	0.82	1.05	0.02	1.22	0.4	0.59	0.95	0.98	0.79	0.83	1.5	0.16	1.06	0.83	-0.215	0.115	0.115	0.445819	0.532598	0.71129	1	0.996511	0.957874
Cadm4	Q8R464	0.86	0.95	0.49	0.79	1.11	1.11	0.42	0.48	0.74	1.04	0.53	1.21	0.77	0.87	1.05	0.8	0.0075	0.1075	0.1	0.974345	0.626283	0.606048	1	0.996511	0.932425
Cadps	Q80TJ1	0.63	0.35	0.56	0.73	0.13	0.82	0.72	0.66	0.06	0.61	0.54	0.37	-0.19	0.1	0.16	0.31	0.015	-0.1725	-0.4725	0.941534	0.393652	0.0394479	1	0.996511	0.658454
Cadps	Q80TJ1-4	-0.57	0.55	0.4	-0.12	0.87	-0.54	-0.79	-0.09	0.1	-1.01	-0.57	-0.65	-1.43	-0.14	-1.62	-0.54	-0.2025	-0.5975	-0.9975	0.630743	0.106898	0.0383112	1	0.996511	0.658454
Cadps	Q80TJ1-2	0.84	1.05	1.02	1.06	1.11	0.95	1.34	1.19	1.01	1.36	1.09	0.47	0.23	1.25	0.55	0.86	0.155	-0.01	-0.27	0.344388	0.964845	0.305667	1	0.996755	0.832533
Cadps	A0A286YE00	0.25	-0.3	0.7	1.43	-0.23	-0.14	1.49	0.68	0.67	-0.34	0.79	0.46	0.15	0.53	0.74	-0.07	-0.07	-0.125	-0.1825	0.888981	0.76772	0.646052	1	0.996511	0.944749
Cadps2	E9Q835	1.19	1.04	1.41	1.37	0.66	1.18	0.99	1.08	0.69	0.62	1.09	0.73	0.5	0.76	0.65	0.91	-0.275	-0.47	-0.5475	0.160649	0.0344319	0.0190411	1	0.996511	0.604671
Cadps2	Q8BYR5-4	-0.89	-0.12	-0.92	-1.75	-1.52	-0.38	0.78	0.13	-0.4	-0.83	-0.76	-0.45	-1.26	-0.34	-0.37	0.24	0.6725	0.31	0.4875	0.234509	0.379414	0.277232	1	0.996511	0.822084
Calb1	P12658	-1.21	-0.68	-0.63	-1.17	-0.28	-0.85	-0.17	-0.74	-1.93	-1.31	-0.58	-0.79	-1.41	-1.03	-0.59	-0.39	0.4125	-0.23	0.0675	0.116954	0.498561	0.817229	1	0.996511	0.972768
Calb2	Q08331	1.06	0.83	0.01	-0.37	0.67	0.78	0.91	0.06	-0.25	-0.86	-0.05	1.59	-0.12	-0.54	1.06	1.11	0.2225	-0.275	-0.005	0.549953	0.633144	0.992017	1	0.996511	0.996154
Calcoco1	Q8CGU1	0.91	0.55	1.18	1.41	0.06	0.63	0.64	0.8	1.03	1.24	0.99	0.4	1.07	0.26	0.67	0.68	-0.48	-0.0975	-0.3425	0.0884823	0.721635	0.228835	1	0.996511	0.787447
Cald1	Q8VCQ8	-2.91	-4.8	-2.78	-3.17	-4.6	-3.87	-4.7	-4.26	-3.4	-2.05	-2.41	-3.87	-2.86	-4.35	-2.98	-4.29	-0.9425	0.4825	-0.205	0.0709832	0.415293	0.719948	1	0.996511	0.958398
Cald1	E9QA15	-2.18	-3.07	-3.12	-2.98	-3.17	-2.72	-4.26	-3.86	-2.43	-1.84	-2.45	-2.48	-1.85	-3.14	-3.33	-3.43	-0.665	0.5375	-0.1	0.114037	0.0831784	0.808051	1	0.996511	0.971953
Calhm2	D3Z2E8	-0.19	0.15	0.64	0.82	0.76	0.32	0.04	0.51	-0.1	0.48	0.54	0.12	-0.83	0.44	-0.59	0.14	0.0525	-0.095	-0.565	0.850845	0.740358	0.152659	1	0.996511	0.750422
Calhm5	Q8R100	-0.48	0.39	0.07	-0.6	1.72	0.43	0.87	0.54	-0.35	0.18	-0.46	-0.71	-0.62	0.87	-0.54	0.6	1.045	-0.18	0.2325	0.0164819	0.557534	0.589889	1	0.996511	0.929142
Calm3	P0DP28	2.67	3.48	3.05	2.12	4.03	3.89	2.9	2.53	0.75	0.22	3.16	2.85	1.44	1.53	2.25	3.64	0.5075	-1.085	-0.615	0.264443	0.157724	0.273371	1	0.996511	0.822084
Calr	P14211	1.46	0.19	0.67	-0.58	1.12	2	2.37	0.98	-0.18	-1.14	0.85	1.61	0.92	-0.64	2.71	2.65	1.1825	-0.15	0.975	0.0408952	0.823277	0.251976	1	0.996511	0.80892
Calu	Q6XLQ8	0.43	1.09	0.61	0.3	1.66	0.38	1.52	0.64	-0.1	0.03	0.35	0.85	0.03	1.43	1.36	1.27	0.4425	-0.325	0.415	0.225273	0.2709	0.276861	1	0.996511	0.822084
Calu	O35887	2.27	2.29	1.12	0.25	3.1	2.29	2.34	0.96	-0.01	0.68	0.71	2.64	0.14	1.29	1.87	1.84	0.69	-0.4775	-0.1975	0.272831	0.492515	0.736608	1	0.996511	0.958635
Caly	Q9DCA7	-2.76	-4.16	-2.05	-2.27	-3.78	-1.5	-2.42	-2.72	-0.44	-2.23	-2	-2.99	1.03	-4.46	-2.06	-1.72	0.205	0.895	1.0075	0.736688	0.193796	0.366879	1	0.996511	0.858904
Camk1	Q91YS8	0.63	0.84	1.38	0.83	0.71	0.86	1.54	1.24	1.05	0.55	1.62	0.88	0.04	1.21	1.57	1.5	0.1675	0.105	0.16	0.519562	0.714276	0.674994	1	0.996511	0.952944
Camk1d	Q8BW96	0.98	0.99	0.27	0.29	0.87	0.8	0.62	0.12	0.54	0.19	0.16	0.81	0.34	0.58	0.09	0.1	-0.03	-0.2075	-0.355	0.911602	0.451582	0.199042	1	0.996511	0.78004
Camk1d	Q8BW96-2	-1.3	-0.86	-1.59	-1.74	0.88	-0.63	-0.1	-1.4	-0.82	-3.23	-1.89	-1.66	-2.38	-1.66	-2.54	-1.12	1.06	-0.5275	-0.5525	0.0510179	0.305899	0.164634	1	0.996511	0.758837
Camk1g	F6YRI7	0.28	0.51	0.64	1.19	0.49	0.35	1.07	0.99	0.73	0.68	1.26	0.49	0.12	1.48	0.32	0.6	0.07	0.135	-0.025	0.795258	0.619209	0.943562	1	0.996511	0.991609
Camk2a	P11798	0.73	1.15	0.49	1.72	0.22	0.35	-0.26	2.14	0.72	2.22	0.85	1.67	1.58	-0.09	0.26	0.37	-0.41	0.3425	-0.4925	0.457048	0.426233	0.270984	1	0.996511	0.822084
Camk2a	F8WIS9	0.19	0.2	-0.39	-0.31	0.23	0.12	-0.47	-0.49	0.39	-0.26	-0.72	0.46	0.64	0.32	-0.59	-0.35	-0.075	0.045	0.0825	0.771026	0.888815	0.802907	1	0.996511	0.971091
Camk2b	P28652	0.05	0.65	0.62	0.35	0.41	0.12	0.49	0.27	0.46	0.43	0.52	0.58	1.08	0.82	0.39	0.79	-0.095	0.08	0.3525	0.631185	0.684571	0.165438	1	0.996511	0.758837
Camk2b	Q5SVI1	0.91	1.53	1.07	1.21	1.2	0.12	1.48	0.38	0.76	1.39	1.1	0.95	0.97	1.22	1.33	0.62	-0.385	-0.13	-0.145	0.273651	0.563628	0.554337	1	0.996511	0.916796
Camk2d	E9Q1T1	0.32	0.74	-0.22	0	0.69	0.32	0.21	0.24	0.5	0.36	0.03	0.78	0.96	0.55	0.52	0.39	0.155	0.2075	0.395	0.537716	0.45722	0.165418	1	0.996511	0.758837
Camk2d	F6RWZ9	-0.95	1.1	-0.71	0.63	0.86	-0.45	0.49	0.42	1.17	0.62	-0.5	0.91	1.21	0.64	-0.36	0.94	0.3125	0.5325	0.59	0.556716	0.363943	0.307473	1	0.996511	0.832533
Camk2d	A0A0G2JGS4	-6.22	-5.38	-7.58	-5.93	-5.78	-5.34	-5.87	-6.56	-3.76	-7.3	-6.17	-5.83	-5.4	-6.13	-5.47	-5.51	0.39	0.5125	0.65	0.435685	0.522001	0.188444	1	0.996511	0.776843
Camk2g	A0A286YCB8	-2.83	-1.57	-1.57	-1.33	-1.14	-3.2	-1.99	-2.44	-1.31	-1.34	-1.88	-2.45	-0.88	2.42	-2.62	-1.69	-0.3675	0.08	1.1325	0.474226	0.846193	0.286945	1	0.996511	0.824333
Camk2g	A0A286YCW8	0.43	0.67	1.72	0.54	0.69	-0.05	1.05	0.66	-0.47	-2.23	0.91	0.57	0.2	-0.24	0.95	1.17	-0.2525	-1.145	-0.32	0.489355	0.127506	0.456258	1	0.996511	0.887169
Camk2g	Q923T9-2	-1.09	0.19	-0.24	-0.13	-3.22	0.94	-2	-1.49	4.39	-4.18	-0.37	-0.23	6.07	-2.28	0.72	-0.85	-1.125	0.22	1.2325	0.196094	0.889474	0.458821	1	0.996511	0.887902
Camk2g	A0A2I3BQP6	-0.26	0.51	0.46	0.13	0.27	-0.09	0.31	-0.16	0.22	-0.38	0.34	0.08	0.63	-0.05	-0.12	-0.03	-0.1275	-0.145	-0.1025	0.587813	0.577244	0.708308	1	0.996511	0.957562
Camk2g	Q923T9-3	-0.71	0.35	1.11	1.55	0.25	-0.79	0.55	1.32	-0.2	1.56	0.89	0.26	-0.03	0.56	1.28	1.25	-0.2425	0.0525	0.19	0.688219	0.927212	0.72632	1	0.996755	0.958398
Camk2n1	Q6QWF9	1.28	1.61	0.56	0.22	0.99	0.87	0.89	0.32	0.78	-0.38	0.76	1.73	1.11	1.87	0.15	0.39	-0.15	-0.195	-0.0375	0.662092	0.697329	0.936609	1	0.996511	0.989767
Camk4	Q8BGR3	-0.42	-1.28	-0.37	-0.69	-1.23	-0.74	-0.1	-0.91	-1.71	-0.82	-0.62	-0.41	-1.25	-1.95	-0.64	-0.79	-0.055	-0.2	-0.4675	0.859763	0.568554	0.212251	1	0.996511	0.786366
Camkk1	Q8VBY2	0.38	0.41	0.59	0.72	0.18	0.06	0.07	0.53	-0.13	0.66	0.14	0.22	-0.23	-0.3	-0.07	0.19	-0.315	-0.3025	-0.6275	0.108904	0.192439	0.01171	1	0.996511	0.566767
Camkk2	Q8C078	-0.23	-0.19	0.21	0.43	-0.16	-0.26	0.25	0.7	-0.27	0.5	0.25	0.12	-0.51	0.22	-0.47	0.03	0.0775	0.095	-0.2375	0.778639	0.704777	0.385848	1	0.996511	0.861533
Camkmt	Q3U2J5	-1.02	-0.58	-0.4	-0.61	-0.39	-1.04	-0.63	-0.75	-0.69	-0.46	-0.66	-1.26	-0.75	-0.02	-1.55	-0.81	-0.05	-0.115	-0.13	0.815592	0.63746	0.702769	1	0.996511	0.956859
Camkv	Q3UHL1	0.37	-0.42	0.28	0.58	-0.38	0.59	0.82	0.73	-0.41	0.19	0.62	0.29	-0.99	-1.14	0.41	0.21	0.2375	-0.03	-0.58	0.491367	0.9225	0.203135	1	0.996755	0.782817
Camlg	P49070	0.01	0.03	0.2	0.46	0.28	0.32	0.62	1.57	0.02	0.64	0.46	0.11	0.94	0.36	1.66	0.95	0.5225	0.1325	0.8025	0.122295	0.547174	0.0236445	1	0.996511	0.624626
Camsap1	A0A0A0MQE5	0.44	0.59	0.45	0.52	0.33	0.51	0.28	0.5	1.07	0.69	0.5	0.94	1.03	0.72	0.23	0.26	-0.095	0.3	0.06	0.524953	0.14021	0.799976	1	0.996511	0.970393
Camsap2	A0A0A6YY67	-0.3	-0.52	-0.18	-0.48	-0.68	-0.76	-0.71	-0.69	-0.51	-0.02	-0.31	-0.24	-0.21	-0.37	-0.54	-0.82	-0.34	0.1	-0.115	0.0500808	0.597014	0.588077	1	0.996511	0.929131
Camsap3	Q80VC9-14	0.01	0.15	0.43	0.53	0.2	-0.03	0.49	0.42	0.5	0.56	0.62	0.33	0.36	0.35	0.54	0.36	-0.01	0.2225	0.1225	0.960277	0.264492	0.54056	1	0.996511	0.912212
Camsap3	Q80VC9-5	1.6	2.42	4.34	2.67	1.79	1.48	2.8	2.8	3.32	4.34	3.18	1.43	2.4	1.26	1.37	4.13	-0.54	0.31	-0.4675	0.386871	0.682853	0.559119	1	0.996511	0.91833
Camta1	A2A891-5	-2.88	-1.41	-0.8	-1.79	-2.05	-3.13	-2.4	-1.94	-2.17	0.57	-1.4	-2	2.24	-0.78	-0.68	-1.24	-0.66	0.47	1.605	0.189108	0.505372	0.0761536	1	0.996511	0.674504
Camta2	B0QZH6	-1.03	-0.17	-0.34	-0.35	-0.44	-0.86	0.15	-0.33	0.11	-0.32	-0.29	-0.13	0.42	0.33	0.08	0	0.1025	0.315	0.68	0.718638	0.214011	0.0219183	1	0.996511	0.621926
Cand1	Q6ZQ38	-0.5	-1	-0.24	-0.2	-0.77	-0.63	-0.21	-0.2	-1.03	-0.03	-0.39	-0.61	-1.29	-0.81	-0.61	-0.32	0.0325	-0.03	-0.2725	0.895551	0.917026	0.36154	1	0.996755	0.858475
Cand2	Q6ZQ73	0.32	-0.81	-0.1	-0.01	0.08	0.44	0.47	0.12	-0.7	0.31	0.35	0.06	-0.71	-0.4	0.17	0.36	0.4275	0.155	0.005	0.135284	0.647006	0.988362	1	0.996511	0.996154
Cant1	Q8VCF1-3	-2.01	-2.43	-1.2	-1.04	-1.79	-2.06	0.07	-1.06	-1.33	-0.67	-0.73	-1.17	-1.5	-0.79	-0.79	0.49	0.46	0.695	1.0225	0.398022	0.0802529	0.0647129	1	0.996511	0.66433
Canx	P35564	0.34	0.18	0.06	0.24	0.48	0.34	0.45	0.19	0.29	0.37	0.08	0.74	0.35	1.01	0.94	0.31	0.16	0.165	0.4475	0.31894	0.417601	0.0856955	1	0.996511	0.691619
Cap1	P40124	0.95	0.12	0.45	0.09	0.19	0.83	0.49	0.6	-0.31	-0.25	0.37	0.69	-0.44	-0.25	0.31	0.2	0.125	-0.2775	-0.4475	0.62171	0.390846	0.144342	1	0.996511	0.743156
Cap2	Q9CYT6	0.95	0.49	1.06	0.56	0.87	0.81	0.83	0.96	-0.18	0.38	0.92	0.64	-0.33	0.26	0.25	0.49	0.1025	-0.325	-0.5975	0.584931	0.271215	0.0415086	1	0.996511	0.658454
Capg	Q99LB4	-1.28	-2.07	-0.69	-0.66	-2.24	-2.77	-0.65	-0.71	-3.06	-0.5	-0.5	-1.82	-2.69	-3.17	-0.78	-0.98	-0.4175	-0.295	-0.73	0.476254	0.645444	0.262916	1	0.996511	0.81524
Capn1	O35350	-0.21	-0.18	-0.16	0.01	-0.03	-0.01	-0.24	0.09	0.28	-0.12	-0.29	-0.19	0.8	0.27	-0.61	-0.31	0.0875	0.055	0.1725	0.574342	0.773536	0.595677	1	0.996511	0.929911
Capn10	Q9ESK3	-0.37	-0.91	-0.49	-0.35	-1.53	-1.76	-0.21	-0.05	2.12	-0.18	-0.48	-0.76	1.38	0.26	-0.49	-0.32	-0.3575	0.705	0.7375	0.415508	0.270147	0.108166	1	0.996511	0.706427
Capn2	O08529	-0.14	0.1	0.04	0.24	0.01	-0.06	0.1	-0.1	-0.16	0.38	-0.07	-0.09	-0.35	0.09	-0.29	-0.13	-0.0725	-0.045	-0.23	0.64525	0.819881	0.260459	1	0.996511	0.814069
Capn5	O08688	0.41	0.33	0.88	0.86	0.84	0.61	1.64	0.81	-0.02	0.49	0.98	0.56	0.04	0.24	0.79	0.79	0.355	-0.1175	-0.155	0.218045	0.662368	0.564958	1	0.996511	0.920315
Capn7	Q9R1S8	0.11	0.18	0.11	0	-0.38	0.24	-0.48	-0.18	0.24	0.02	-0.15	0.29	0.09	-0.25	-0.61	-0.3	-0.3	-7.85046e-17	-0.3675	0.155451	1	0.10463	1	1	0.702979
Capns1	O88456	0.24	0.23	0.61	0.59	0.05	0.29	0.72	0.51	0.48	0.1	0.56	0.41	0.36	0.64	0.03	0.57	-0.025	-0.03	-0.0175	0.904113	0.87908	0.9372	1	0.996511	0.989767
Caprin1	Q60865	-2.32	-2.32	-2.15	-2.35	-1.77	-2.48	-1.9	-2.26	-2.79	-1.41	-2.05	-1.92	-1.97	-1.89	-1.99	-1.96	0.1825	0.2425	0.3325	0.37671	0.421452	0.0745695	1	0.996511	0.671911
Capza1	Q5RKN9	0.34	0.49	0.22	0.56	0.59	0.58	0.59	0.55	0.35	0.79	0.57	0.65	-0.03	0.63	0.2	0.51	0.175	0.1875	-0.075	0.264934	0.320329	0.733142	1	0.996511	0.958635
Capza2	P47754	0.27	-0.04	0.45	0.41	0.36	0.61	0.89	0.84	-0.62	-0.12	0.47	0.18	-0.97	-0.34	0.23	0.63	0.4025	-0.295	-0.385	0.0689524	0.29582	0.301549	1	0.996511	0.830308
Capzb	P47757-2	1.43	0.98	1.04	1.44	0.96	1.12	1.07	1.52	1.56	1.38	1.18	1.4	1.01	1.55	0.73	0.68	-0.055	0.1575	-0.23	0.788082	0.433409	0.391476	1	0.996511	0.865375
Capzb	P47757	0.4	0.64	0.6	1.84	0.03	0.13	0.55	0.78	0.95	2.72	1.05	0.19	0.74	1.22	1.01	1.06	-0.4975	0.3575	0.1375	0.187366	0.538928	0.689026	1	0.996511	0.955729
Card19	Q9D1I2	0.07	0.18	0.75	1.23	-0.59	0.11	0.98	0.72	0.45	0.72	0.67	-0.03	0.93	-0.37	0.58	1.56	-0.2525	-0.105	0.1175	0.546586	0.742999	0.797326	1	0.996511	0.969727
Carhsp1	Q9CR86	0.12	-0.24	-0.68	-0.27	-0.5	-0.73	-0.51	-0.72	-0.08	-1.82	-0.77	-0.12	0.19	-0.21	-0.98	-1.13	-0.3475	-0.43	-0.265	0.118549	0.316836	0.458134	1	0.996511	0.887902
Carm1	D3YUP1	-0.53	-0.24	-1.02	-1.21	-0.17	-0.4	-1.15	-1.32	-0.49	-1.77	-1.04	-0.68	-0.7	-0.32	-1.48	-1.64	-0.01	-0.245	-0.285	0.976846	0.492335	0.456076	1	0.996511	0.887169
Carmil1	D3Z030	0.16	0.2	0.83	0.65	0.45	0.19	1.04	0.82	0.11	0.96	1.01	0.35	0.17	0.29	0.73	0.81	0.165	0.1475	0.04	0.531215	0.611204	0.877236	1	0.996511	0.979626
Carmil2	S0DHL8	0.86	0.95	0.47	0.65	1.1	0.4	0.85	0.69	0.92	-0.33	0.46	0.49	1.55	0.54	0.88	0.23	0.0275	-0.3475	0.0675	0.895767	0.251534	0.828735	1	0.996511	0.973757
Carmil3	Q3UFQ8	0.31	0.21	-0.09	0.33	-0.12	0.59	0.67	0.44	0.55	0.21	0.17	0.38	0.59	0.59	0.32	0.38	0.205	0.1375	0.28	0.372966	0.472882	0.172462	1	0.996511	0.76392
Carnmt1	Q80UY1	-1.79	-2.6	-0.3	-0.42	-3.39	-1.01	-1.39	-0.96	-0.06	-0.74	-0.19	-0.84	1.73	-1.13	-0.78	-0.55	-0.41	0.82	1.095	0.574506	0.157462	0.1799	1	0.996511	0.775542
Cars1	Q9ER72	-0.55	-0.97	-0.82	-0.8	-1.07	-0.75	-0.98	-0.57	-1.12	-0.83	-0.66	-0.45	-1.08	-0.71	-1.04	-0.98	-0.0575	0.02	-0.1675	0.756025	0.923889	0.397714	1	0.996755	0.867334
Cars2	Q8BYM8	1.5	1.83	0.36	0.53	0.69	1.48	0.27	0.45	0.62	0.02	0.37	1.58	0.3	1.16	-0.17	0.11	-0.3325	-0.4075	-0.705	0.437392	0.387765	0.133657	1	0.996511	0.729871
Cartpt	P56388-2	-1.22	-0.78	-1.36	-0.5	-0.35	-2.13	0.06	-0.71	-0.78	0.34	-1.23	-0.63	-0.51	0.17	1.61	0.86	0.1825	0.39	1.4975	0.70326	0.311379	0.0103304	1	0.996511	0.563386
Casc3	Q8K3W3	-1.71	-1.76	-1.29	-1.76	-2.27	-2.21	-2.07	-1.48	-1.94	0.18	-1.58	-1.92	-0.29	-1.52	-0.76	-1.67	-0.3775	0.315	0.57	0.13117	0.519671	0.124287	1	0.996511	0.721448
Casd1	Q7TN73	-0.29	-0.59	-0.32	0.12	0.24	-2.74	0.44	-0.82	-0.26	-0.73	-0.93	-0.93	-0.47	1.27	-0.49	0.41	-0.45	-0.4425	0.45	0.509596	0.0951604	0.304486	1	0.996511	0.831662
Cask	B1AUH5	0.71	1.02	1.24	2.51	1.77	0.65	1.34	2.77	0.59	3.2	2.14	0.77	0.15	-1.07	1.97	1.31	0.2625	0.305	-0.78	0.632205	0.648897	0.285545	1	0.996511	0.822669
Cask	O70589	0.75	0.48	0.93	0.87	0.75	0.79	1.17	1.03	0.29	0.83	0.95	0.8	-0.06	0.29	0.89	0.82	0.1775	-0.04	-0.2725	0.347345	0.853287	0.328886	1	0.996511	0.844943
Caskin1	Q6P9K8	1.29	0.92	0.93	1.05	0.48	1.08	0.36	0.74	1.15	1.15	0.81	1.11	1.01	1.14	0.74	0.37	-0.3825	0.0075	-0.2325	0.0954935	0.967218	0.33302	1	0.996755	0.845601
Caskin2	Q8VHK1	-0.03	0.46	0.4	0.39	0.13	-0.06	0.53	0.35	-0.3	0.99	0.45	-0.06	-0.26	-1.02	0.85	0.52	-0.0675	-0.035	-0.2825	0.739664	0.910238	0.501615	1	0.996744	0.901002
Casp1	P29452	-1.42	-2.28	-1.31	-0.59	-0.68	-0.84	-0.32	-0.07	-0.86	3.21	-1.24	-1.82	-0.76	-1.15	0.05	-0.92	0.9225	1.2225	0.705	0.0324225	0.27342	0.116867	1	0.996511	0.718608
Casp3	P70677	-0.7	-1.19	-1.67	-1.44	-0.7	-1.01	-1.41	-1.23	-0.45	-0.79	-1.52	-0.07	-1.01	-0.72	-1.61	-1.57	0.1625	0.5425	0.0225	0.544526	0.159708	0.942178	1	0.996511	0.991114
Casp6	O08738	-2.44	-2.35	-1.7	-2.02	-0.67	-0.88	-1.23	-1.9	-1.1	-0.62	-1.37	-0.79	-3.22	-0.42	-1.92	-1.72	0.9575	1.1575	0.3075	0.0131202	0.00156723	0.580307	1	0.996511	0.927734
Casp7	P97864	-0.85	-1.31	-0.64	-0.29	-2.35	-0.9	-1.26	-0.9	0.6	0.29	-0.83	-0.88	1.63	-2.07	-0.75	-1.39	-0.58	0.5675	0.1275	0.156249	0.195096	0.865407	1	0.996511	0.977956
Casp8	A0A087WQT6	-1.92	-2.31	-0.39	0.32	-1.55	-2.47	-1.1	0.16	-3.24	0.38	-0.23	-1.69	-3.09	-3.49	-0.73	-0.1	-0.165	-0.12	-0.7775	0.825702	0.89601	0.417428	1	0.996511	0.87558
Casq2	E9PZ67	-1.03	-0.83	-0.04	-0.73	-0.14	-1.13	-0.6	-0.39	-0.3	0.91	-0.04	-1	1.11	-0.43	0.09	-0.3	0.0925	0.55	0.775	0.757438	0.218931	0.0771452	1	0.996511	0.676667
Cast	Q8C281	-0.85	-0.85	-0.43	-0.39	-1.37	-0.87	-1.27	-0.77	-0.89	-0.33	-0.87	-0.64	-0.66	-0.73	-1.06	-1.1	-0.44	-0.0525	-0.2575	0.070813	0.811296	0.26158	1	0.996511	0.81412
Castor2	Q8CAB8	-1.16	-0.6	-0.85	-1.39	-1.08	-1.09	-0.93	-1.1	0.23	-0.91	-1.09	-0.82	0.43	0.03	-1.13	-0.83	-0.05	0.3525	0.625	0.809479	0.315124	0.136217	1	0.996511	0.731656
Cat	P24270	0.07	-0.02	0.61	0.8	0.6	0.69	1.18	0.83	0.72	0.41	0.6	0.28	0.91	0.75	0.81	0.84	0.46	0.1375	0.4625	0.0934626	0.582131	0.0826269	1	0.996511	0.68865
Cav1	P49817	-0.42	-0.44	0.08	-0.37	-0.3	-0.5	0.08	-0.33	-1.14	-0.5	0.51	-0.15	-0.18	-1.69	0.21	-0.03	0.025	-0.0325	-0.135	0.902636	0.927386	0.752074	1	0.996755	0.961479
Cavin1	O54724	-0.57	-0.54	-0.3	-0.29	-0.34	-0.52	-0.49	-0.43	-0.54	-0.12	-0.13	-0.33	-0.47	-0.41	-0.64	-0.46	-0.02	0.145	-0.07	0.896865	0.442812	0.699462	1	0.996511	0.955729
Cavin2	Q63918	-0.45	-1.26	-0.37	-0.11	-0.8	-0.73	-0.13	-0.7	-0.39	-0.36	0.1	-0.76	-0.14	-0.89	-0.47	0.09	-0.0425	0.195	0.195	0.884346	0.531499	0.558879	1	0.996511	0.918101
Cavin3	Q91VJ2	-2.61	-3.36	-3.43	-3.14	-2.29	-2.61	-3.57	-3.39	-2.56	-1.62	-3.18	-2.61	-1.44	-2.99	-3.12	-3.26	0.17	0.6425	0.4325	0.624924	0.104148	0.338764	1	0.996511	0.847578
Cbarp	Q66L44	0.36	0.59	0.17	0.03	0.85	0.76	-0.11	-0.09	2.42	-0.06	0.31	0.79	3.07	0.93	1.09	0.28	0.065	0.5775	1.055	0.82225	0.283513	0.0894303	1	0.996511	0.69217
Cbarp	E9Q6U0	-1.05	-2.27	-1.31	-0.73	-1.87	-0.01	-0.56	-0.26	-1.62	0.21	-0.22	-1.09	-1.97	0.17	-0.75	-0.3	0.665	0.66	0.6275	0.198497	0.204646	0.251977	1	0.996511	0.80892
Cbfa2t2	A2AKD9	-0.73	-2.47	-1.38	-3.96	-2.53	-2.16	-1.91	-2.87	-1.52	-1.56	-2.56	-2.53	-1.1	-3.28	-1.01	-2.33	-0.2325	0.0925	0.205	0.72882	0.893979	0.798441	1	0.996511	0.969727
Cbfb	Q08024-2	-0.29	-0.42	-0.98	-0.8	0.14	-0.46	-0.8	-0.57	-0.42	-0.46	-0.58	-0.5	-0.93	0.78	-0.85	-1.2	0.2	0.1325	0.0725	0.457207	0.529908	0.87231	1	0.996511	0.979626
Cbl	P22682	0.07	-0.12	-0.13	0.31	-0.38	-0.4	-0.16	-0.05	-0.25	0.01	-0.21	-0.1	-0.15	-0.21	-0.09	-0.19	-0.28	-0.17	-0.1925	0.145363	0.364009	0.319146	1	0.996511	0.838969
Cblb	B9EKI5	0.25	0.39	-0.92	-0.26	0.68	0.19	-0.09	-0.29	0.86	0.26	-0.29	-0.27	0.53	0.83	-0.77	-0.5	0.2575	0.275	0.1575	0.468637	0.483506	0.732982	1	0.996511	0.958635
Cbll1	E9QM14	-0.26	-0.95	-0.41	-0.24	-0.38	-1.06	-0.64	-0.09	-0.71	1.47	-0.57	-0.79	0.23	-0.13	1.32	-0.16	-0.0775	0.315	0.78	0.774608	0.552499	0.0634053	1	0.996511	0.66433
Cbln1	Q9R171	0.26	0.63	-0.93	-1.03	1.37	1.01	-0.12	-0.73	0.71	-1.17	-0.08	0.11	0.63	1.38	-0.44	-1.09	0.65	0.16	0.3875	0.285755	0.76346	0.543407	1	0.996511	0.912212
Cbln4	Q8BME9	-0.61	0.83	-0.15	0.26	-0.05	-1.24	0.41	0	-1.06	-0.27	0.12	-0.63	-1.15	1.17	-0.05	0.28	-0.3025	-0.5425	-0.02	0.495582	0.180168	0.969703	1	0.996511	0.992767
Cbr1	P48758	0.33	-0.35	-0.15	-0.53	-0.18	0.1	0.39	-0.04	0.04	-1.65	0.03	0.29	0.34	-0.55	0.21	0	0.2425	-0.1475	0.175	0.323295	0.745974	0.547037	1	0.996511	0.912571
Cbr2	P08074	0	-0.15	-0.38	0.86	-0.83	-0.86	-0.58	-0.1	-0.43	-0.81	-0.09	-0.01	-1.12	-0.97	-0.39	-0.69	-0.675	-0.4175	-0.875	0.0583775	0.221559	0.022131	1	0.996511	0.621926
Cbr3	Q8K354	0.15	-0.02	-0.7	-0.31	0.01	-0.23	-0.61	-0.14	0.08	-0.43	-0.62	-0.22	-0.13	0.31	-0.99	-0.83	-0.0225	-0.0775	-0.19	0.926111	0.764994	0.593607	1	0.996511	0.929843
Cbr4	Q91VT4	1.6	0.77	0.71	0.54	0.34	1.22	0.82	0.78	-0.06	-0.06	1.14	1.14	-0.06	0.15	0.31	0.78	-0.115	-0.365	-0.61	0.698755	0.374484	0.0735416	1	0.996511	0.669435
Cbs	Q91WT9-2	0.28	-0.72	-0.26	-0.23	-0.14	0.23	-0.46	-0.06	-0.15	0.21	0.11	-0.07	-0.49	-0.04	-0.15	-0.44	0.125	0.2575	-0.0475	0.630456	0.309803	0.855366	1	0.996511	0.976225
Cbwd1	Q8VEH6	-0.64	-0.44	0.5	0.92	-0.66	-0.72	0.75	0.77	-0.44	0.69	0.61	-0.05	-0.48	-1.39	-0.45	0.28	-0.05	0.1175	-0.595	0.922777	0.787547	0.231195	1	0.996511	0.788863
Cbx1	P83917	0.27	-0.13	-0.17	0.18	0.68	0.37	0.27	-0.13	0.15	-1.16	-0.34	0.77	-0.41	-0.3	-0.24	0.29	0.26	-0.1825	-0.2025	0.261705	0.652473	0.395902	1	0.996511	0.867334
Cbx3	Q9DCC5	0.49	-0.34	-1.4	-0.66	-0.73	-0.31	-1.27	-0.83	-0.05	-1.74	0.5	-0.05	-0.52	0.04	-1.56	-1.07	-0.3075	0.1425	-0.3	0.462711	0.80404	0.543247	1	0.996511	0.912212
Cbx5	Q61686	-0.05	-0.37	0.09	0.34	-0.35	0.11	0.31	0.3	0.05	0.08	-0.14	-0.12	0.1	-0.44	0.08	0.28	0.09	-0.035	0.0025	0.699703	0.864314	0.991971	1	0.996511	0.996154
Cbx8	Q9QXV1	0.41	-0.64	0.02	0.7	-0.99	-0.49	0.03	-0.22	0.2	0.51	-0.18	-0.2	0.67	0.21	0.57	0.68	-0.54	-0.04	0.41	0.148501	0.904294	0.218258	1	0.996744	0.787447
Cby1	Q9D1C2	0.56	0.23	-0.33	-0.6	0.06	-0.18	0.1	-0.78	-0.14	0.52	-1.29	0.59	1.78	0.26	0.02	0.81	-0.165	-0.045	0.7525	0.613238	0.92456	0.118849	1	0.996755	0.721448
Cc2d1a	Q8K1A6	0.19	0.45	0.28	0.56	0.62	0.58	0.36	0.76	0.39	0.84	0.7	0.42	0.32	0.73	0.4	0.56	0.21	0.2175	0.1325	0.237804	0.276454	0.502576	1	0.996511	0.901002
Cc2d1a	E9PX94	0.73	1.85	-0.33	0.49	0.97	1.27	-0.21	-0.08	1.44	2.22	0	2.11	0.75	1.21	0.07	-0.04	-0.1975	0.7575	-0.1875	0.713113	0.244032	0.709289	1	0.996511	0.957656
Cc2d1b	Q8BRN9	0.4	0.41	0.21	0.53	0.2	0.52	0.03	0.23	1.41	1.06	0.2	0.48	1.81	-0.35	0.48	0.31	-0.1425	0.4	0.175	0.417623	0.192621	0.688479	1	0.996511	0.955729
Cc2d2a	Q8CFW7-2	-1	0.5	1.31	0.93	-3.29	-0.89	-1.68	-1.31	1.2	-0.39	-1.76	-1.34	2.37	-0.97	5.33	-0.87	-2.2275	-1.0075	1.03	0.00823278	0.203185	0.472016	1	0.996511	0.891144
Ccar1	Q8CH18-3	-1.95	-2.39	-2.18	-3.06	-1.65	-2.42	-2.3	-3.26	-2.26	-1.03	-2.89	-2.1	-1.91	-1.68	-0.39	-2.72	-0.0125	0.325	0.72	0.974176	0.457266	0.176331	1	0.996511	0.771503
Ccar2	Q8VDP4	-1.92	-3.29	-2.73	-2.68	-3.4	-2.99	-3.19	-2.75	-2.85	-1.35	-2.29	-3.31	-2.39	-2.71	-2.89	-3.26	-0.4275	0.205	-0.1575	0.190803	0.66698	0.641481	1	0.996511	0.943421
Ccdc106	E9QPN6	-0.5	-0.52	-0.49	0.63	-1.7	-0.25	0.57	0.68	1.3	1.01	0.1	-1.18	0.15	-0.33	0.33	1.31	0.045	0.5275	0.585	0.936497	0.371163	0.192636	1	0.996511	0.777539
Ccdc107	Q9DCC3	-0.49	-1.02	0.09	0.58	-0.84	-0.83	-0.71	-0.51	2.75	2.66	-1.2	-0.31	2.83	3.39	1.32	1.45	-0.5125	1.185	2.4575	0.161375	0.240094	0.00199675	1	0.996511	0.419079
Ccdc115	Q8VE99	0.61	-0.6	-0.04	-0.04	0.16	-0.99	-0.17	0.35	-0.08	0.02	-0.49	-0.38	0.2	0.34	1.48	0.92	-0.145	-0.215	0.7525	0.694659	0.459089	0.0710721	1	0.996511	0.668066
Ccdc12	Q8R344	-1.72	-2.49	-2.05	-1.95	-3.76	-1.89	-2.65	-1.97	-1.82	-1.99	-1.91	-2.3	-0.03	-2.7	-1.3	-2.49	-0.515	0.0475	0.4225	0.252525	0.833731	0.476664	1	0.996511	0.892174
Ccdc120	A2AEV7	0.27	0.42	0.02	0.51	1.32	0.86	-0.08	0.58	0.25	1.02	0.43	0.7	0.85	-0.69	-0.29	0.37	0.365	0.295	-0.245	0.255018	0.222942	0.495894	1	0.996511	0.89758
Ccdc124	Q9D8X2	-1.9	-2.07	-1.02	-1.16	-1.7	-2.02	-1.59	-1.34	-0.92	-1.14	-1.21	-1.76	-0.2	-0.63	-0.92	-1.39	-0.125	0.28	0.7525	0.674602	0.389666	0.0609394	1	0.996511	0.661738
Ccdc127	E0CYX9	-0.16	0.17	0.4	0.2	-0.02	0.16	-0.11	0.03	0.1	-0.04	0.21	-0.22	0.34	0.49	-0.09	0.27	-0.1375	-0.14	0.1	0.444367	0.487845	0.651317	1	0.996511	0.947503
Ccdc134	Q8C7V8	-0.26	-0.16	-0.17	-0.06	0.32	-0.46	0.81	0.32	-0.44	0.51	-0.34	-0.07	-0.31	0.69	0.69	1.12	0.41	0.0775	0.71	0.156741	0.750502	0.0471871	1	0.996511	0.658454
Ccdc136	D3Z165	-0.01	0.58	0.32	0.28	0.77	-0.1	0.72	0.27	0.64	-0.14	0.36	0.12	0.25	1.48	0.21	0.65	0.1225	-0.0475	0.355	0.626624	0.840127	0.289794	1	0.996511	0.825111
Ccdc137	Q8R0K4	0.35	-0.48	-0.24	0.17	-0.92	0.02	-0.24	0.31	0.16	0.58	-0.15	-1.08	1.06	-0.38	-0.1	-0.2	-0.1575	-0.0725	0.145	0.621881	0.850585	0.696239	1	0.996511	0.955729
Ccdc141	E9Q8Q6	0.01	0.3	-0.39	-0.01	0.36	-0.2	-0.07	-0.81	0.56	0.49	-0.43	0.17	0.48	0.61	0.02	-0.12	-0.1575	0.22	0.27	0.580375	0.438737	0.308166	1	0.996511	0.833667
Ccdc149	A0A1D5RM99	-0.57	-0.77	-2.18	-1.53	-0.81	-0.41	-2.25	-2.05	0.18	-1.91	-1.69	-0.09	0.14	-0.57	-0.98	-1.5	-0.1175	0.385	0.535	0.826869	0.524587	0.277624	1	0.996511	0.822084
Ccdc167	Q9D162	2.8	2.42	1.03	0.49	2.53	2.44	0.77	0.69	3.65	0.91	0.66	2.75	4.18	3.86	1.74	1.71	-0.0775	0.3075	1.1875	0.909064	0.708901	0.153669	1	0.996511	0.750763
Ccdc177	Q3UHB8	0.68	0.83	0.94	0.56	0.27	0.59	0.51	0.42	0.59	0.66	0.68	0.33	0.86	0.16	0.41	0.47	-0.305	-0.1875	-0.2775	0.0924474	0.315996	0.226122	1	0.996511	0.787447
Ccdc184	Q8BMK5	-0.67	-0.21	-0.72	-0.41	0.27	-0.31	-1.28	-0.87	0.36	-0.64	-0.32	-1.45	0.29	0.27	-0.98	-0.11	-0.045	-0.01	0.37	0.896094	0.978979	0.272827	1	0.998749	0.822084
Ccdc186	Q8C9S4	-1.25	-1.15	-0.27	-0.66	-1.94	-1.15	-1.3	-1	-0.74	-0.19	-0.65	-0.98	-0.08	-0.77	-0.68	-0.82	-0.515	0.1925	0.245	0.118094	0.512504	0.421079	1	0.996511	0.875639
Ccdc22	Q9JIG7	-0.01	0.12	0.14	-0.04	0.56	-0.3	0.09	0.2	0.17	0	0.23	0.04	0.07	0.73	0.01	0.15	0.085	0.0575	0.1875	0.687623	0.72311	0.407644	1	0.996511	0.874084
Ccdc25	Q78PG9	-0.24	-1.33	-0.77	-0.72	-1.07	-0.1	-0.56	-0.65	-1.19	0.99	-0.58	0.15	-0.63	-1.2	-0.66	-0.54	0.17	0.6075	0.0075	0.570999	0.232132	0.979099	1	0.996511	0.994274
Ccdc28a	Q3UFK1	-0.09	0.38	0.23	0.48	0.97	-0.43	0.19	0.42	-0.22	-0.53	0.25	-0.12	-2.51	-1.49	-1.89	-0.02	0.0375	-0.405	-1.7275	0.903792	0.110691	0.00751856	1	0.996511	0.552614
Ccdc28b	Q8CEG5	-6.5	-7.69	-7.85	-8.77	-7.58	-4.38	-5.05	-7.09	-8.52	-14.08	-4.92	-5.9	-9.04	-8.66	-8.11	-6.34	1.6775	-0.6525	-0.335	0.0659729	0.728912	0.62845	1	0.996511	0.940342
Ccdc32	Q3UHY7	0.63	0.7	-0.79	-0.9	0.42	0.37	-1.13	-1.19	0.55	-0.39	-0.61	1.15	0.9	2.03	-1.49	-1.62	-0.2925	0.265	0.045	0.612164	0.633875	0.960054	1	0.996511	0.992636
Ccdc33	A0A1L1SR74	0.14	0.71	0.33	0.83	0.19	-0.71	0.88	0.24	-0.69	-0.91	0.04	-0.2	-0.59	0.4	0.42	0.11	-0.3525	-0.9425	-0.4175	0.32895	0.00854888	0.186594	1	0.996511	0.776843
Ccdc43	Q9CR29	-2.71	-2.65	-3.04	-3.92	-3.12	-2.88	-3.94	-4	-2.38	-1.34	-3.66	-2.42	-1.78	-2.3	-3.4	-3.5	-0.405	0.63	0.335	0.310755	0.243407	0.491842	1	0.996511	0.897531
Ccdc47	Q9D024	-0.19	-0.21	-0.07	-0.16	0.38	-0.24	0.79	0.31	-0.33	-0.27	-0.23	-0.14	0.27	-0.18	1.06	1	0.4675	-0.085	0.695	0.0708787	0.588565	0.0486453	1	0.996511	0.658454
Ccdc50	A0A668KL36	0.13	-0.25	-0.29	-0.32	-0.14	-0.53	-1.02	-0.88	-0.06	0.55	-0.49	0.12	-0.19	0.36	-0.4	-0.64	-0.46	0.2125	-0.035	0.081517	0.421764	0.894755	1	0.996511	0.983453
Ccdc51	Q3URS9-2	0.13	0.3	0.49	0.72	-0.05	0.25	-0.31	0.2	0.28	-0.57	0.42	-0.07	0.78	0.09	-0.29	-0.05	-0.3875	-0.395	-0.2775	0.0915312	0.168784	0.338877	1	0.996511	0.847578
Ccdc59	Q32M26	0.02	-0.26	0.94	1.06	1.42	-0.19	-1.24	0.38	1.09	0.94	0.47	-0.42	2.09	0	1.41	0.17	-0.3475	0.08	0.4775	0.559337	0.857542	0.398646	1	0.996511	0.867334
Ccdc6	D3YZP9	0.38	0.31	0.11	0.18	0.09	0.08	-0.05	0.01	1.15	0.36	-0.24	0.39	1.25	0.73	0.01	-0.26	-0.2125	0.17	0.1875	0.176083	0.571678	0.592153	1	0.996511	0.929843
Ccdc85a	F6TRJ8	-0.36	-0.07	0.67	0.47	-0.28	-0.21	-0.25	1.01	-0.95	1.03	1.1	-0.16	0.35	-0.02	1.31	0.27	-0.11	0.0775	0.3	0.769648	0.8791	0.42291	1	0.996511	0.875782
Ccdc85a	E0CX32	-0.37	0.36	0.21	0.43	-0.05	-0.08	-0.5	0.1	0.58	0.19	0.27	-0.04	1.05	-0.39	0.44	-0.08	-0.29	0.0925	0.0975	0.244688	0.708883	0.786342	1	0.996511	0.967714
Ccdc85b	Q6PDY0	-1.23	-1.55	-1.75	-1.64	-1.35	-0.92	-1.44	-1.72	-1.79	-1.2	-1.8	-1.38	-1.62	-0.96	-2.46	-2.02	0.185	1.96262e-16	-0.2225	0.415228	1	0.516137	1	1	0.905674
Ccdc85c	A0A217FL83	-0.3	-0.71	0.3	0.45	-1.01	-0.64	-0.12	0.13	0.82	0.1	0.29	-0.45	2.09	-0.46	0.09	0.15	-0.345	0.255	0.5325	0.346506	0.491068	0.362612	1	0.996511	0.858475
Ccdc88a	Q5SNZ0-2	0.31	0.49	0.53	0.5	0.46	0.43	0.25	0.38	0.61	0.84	0.59	0.7	0.89	0.81	0.44	0.09	-0.0775	0.2275	0.1	0.602343	0.188447	0.669732	1	0.996511	0.952558
Ccdc88c	Q6VGS5	0.85	-0.18	-1.45	-1.43	0.64	0.68	-2.08	-1.69	0.94	-0.53	-1.71	0.99	1.26	0.97	-1.05	-2.02	-0.06	0.475	0.3425	0.942452	0.542793	0.694444	1	0.996511	0.955729
Ccdc9	D3YW42	-0.62	-0.79	-0.28	-0.27	-0.72	-1.22	-1.15	-0.61	-0.72	0.47	-0.53	-0.78	0.07	-0.35	-0.27	-0.71	-0.435	0.1	0.175	0.077329	0.754641	0.477845	1	0.996511	0.892279
Ccdc90b	Q8C3X2	0.31	0.66	0.64	0.67	0.16	0.44	0.81	0.44	0.3	0.47	0.94	0.12	0.75	0.21	0.45	1.1	-0.1075	-0.1125	0.0575	0.584526	0.625474	0.8157	1	0.996511	0.972768
Ccdc91	Q9D8L5	0.33	0.45	-0.64	-0.81	0.2	0.2	-0.64	-0.68	0.18	-0.75	-0.7	0.19	-0.19	0.2	-0.91	-1.12	-0.0625	-0.1025	-0.3375	0.871707	0.797692	0.437245	1	0.996511	0.883161
Ccdc92	Q8VDN4	0.19	0.22	0.61	0.3	0.18	0.03	0.24	0.48	0.51	0.78	0.55	0.06	0.26	0.72	0.43	0.27	-0.0975	0.145	0.09	0.590336	0.510283	0.663526	1	0.996511	0.949825
Ccdc92b	Q5SUE3	1.11	2.22	0.84	1.74	1.97	1.16	0.2	0.87	1.06	1.23	1.02	1.77	0.95	1.15	0.87	0.72	-0.4275	-0.2075	-0.555	0.352933	0.556123	0.117689	1	0.996511	0.718913
Ccdc93	E9QAD4	1.31	-1.01	-1.12	0.35	-0.42	0.43	-1.25	-0.92	0.02	-0.57	-0.22	0.61	-0.23	0.39	-1.05	-0.8	-0.4225	0.0775	-0.305	0.504861	0.893808	0.618266	1	0.996511	0.937583
Ccdc93	Q7TQK5	-0.06	0.06	-0.01	0.09	-0.05	-0.13	-0.58	-0.24	0.23	0.07	-0.17	-0.21	0.44	-0.02	-0.17	-0.33	-0.27	-0.04	-0.04	0.143929	0.822099	0.855849	1	0.996511	0.976225
Ccdc97	Q9DBT3	-1.72	-0.94	-1.59	-1.73	-1.92	-1.87	-1.68	-1.81	-1.27	-1.49	-1.5	-1.45	0.03	-1.11	-2.22	-2.09	-0.325	0.0675	0.1475	0.16305	0.767843	0.774997	1	0.996511	0.966519
Cck	P09240	0.73	1.04	0.36	0.75	0.77	1.69	0.61	0.39	0.72	0.77	0.88	1.18	1.07	1.66	0.86	1.18	0.145	0.1675	0.4725	0.64462	0.442032	0.0880097	1	0.996511	0.691619
Cckbr	P56481	1.75	1.57	2.11	0.36	2.65	2.22	0.65	1.58	-0.75	1.28	1.97	2.71	-0.45	-1.15	1.85	1.6	0.3275	-0.145	-0.985	0.541185	0.848024	0.214238	1	0.996511	0.786931
Ccm2	Q8K2Y9-2	0.55	-0.36	-0.04	-0.01	-0.49	-0.08	-0.22	-0.21	0.28	-0.17	-0.3	-0.61	0.4	-0.27	-0.22	-0.43	-0.285	-0.235	-0.165	0.232302	0.406855	0.562588	1	0.996511	0.920024
Ccn2	P29268	-0.25	-0.44	-1.12	-0.29	-0.57	0.3	-0.99	-0.83	-0.72	-1.17	-0.89	-0.05	0.09	-0.78	-0.29	-0.69	0.0025	-0.1825	0.1075	0.994125	0.565255	0.719334	1	0.996511	0.958398
Ccn3	Q64299	-3.03	-3.98	-3.67	-2.64	-3.35	-2.25	-2.35	-2.49	-2.17	-0.63	-3.25	-2.14	-2.07	-2.61	-2.09	-2.33	0.72	1.2825	1.055	0.0822575	0.0478928	0.0106874	1	0.996511	0.563386
Ccnk	Q3U3M5	-1.45	-2.59	-3.04	-2.47	-2.59	-2.16	-3.51	-2.98	-2.05	-2.57	-2.55	-2.56	-0.96	-1.93	-3.22	-3.6	-0.4225	-0.045	-0.04	0.323384	0.898093	0.949504	1	0.996511	0.992476
Ccnl2	Q9JJA7	-0.65	-0.13	-1.82	-2.72	-0.31	-0.07	-1.55	-1.68	0.26	-0.97	-1.35	-0.15	0.08	0.19	-1.24	-0.66	0.4275	0.7775	0.9225	0.516049	0.238175	0.15931	1	0.996511	0.754511
Ccnt1	Q9QWV9	-1.05	-1.03	-6.01	-8.37	-0.84	-1.65	-6.87	-6.88	-0.76	-5.13	-6.73	-1.26	-1.92	-0.14	-6.15	-6.11	0.055	0.645	0.535	0.979957	0.758373	0.800103	1	0.996511	0.970393
Ccnt2	Q7TQK0-2	-3.79	-5.6	-4.21	-4.55	-6.57	-4.54	-4.54	-4.37	-4.13	-0.16	-3.93	-3.14	-2.54	-4.85	-2.88	-4.12	-0.4675	1.6975	0.94	0.439477	0.0862876	0.147594	1	0.996511	0.746406
Ccny	Q8BGU5	0.48	0.74	0.7	0.84	0.66	0.27	0.61	0.63	0.48	0.84	0.71	0.39	0.37	1.07	0.52	0.57	-0.1475	-0.085	-0.0575	0.398619	0.652076	0.794487	1	0.996511	0.969367
Ccnyl1	D3YUJ3	1.44	1.47	0.91	0.71	1.69	0.94	0.9	0.69	1.83	0.97	0.91	1.71	1.46	2.04	0.99	0.95	-0.0775	0.2225	0.2275	0.789768	0.480117	0.488067	1	0.996511	0.897531
Ccp110	Q7TSH4	-0.46	0.12	1.08	0.49	-0.77	0.09	0.32	0.41	0.79	1.2	0.67	0.07	2.01	-0.74	0.77	0.85	-0.295	0.375	0.415	0.464979	0.342388	0.492278	1	0.996511	0.897531
Ccs	A0A494BB58	0.2	-0.09	-0.52	-0.27	-0.55	0.36	-0.59	0.11	0.01	0.1	-0.32	0	0.65	-1.06	-0.33	-0.4	0.0025	0.1175	-0.115	0.992971	0.590447	0.759393	1	0.996511	0.963123
Ccsap	Q8QZT2	-1.15	-1.57	-1.34	-1.44	-2.65	-1.7	-3.08	-2.05	-2.56	-0.92	-2.2	-0.99	-1.09	-1.68	-1.87	-2.42	-0.995	-0.2925	-0.39	0.0111707	0.479512	0.216918	1	0.996511	0.787447
Ccser1	Q8C0C4-3	0.46	0.9	1.01	0.39	0.64	-0.27	0.57	0.81	-0.05	-0.11	0.86	0.67	-0.42	-0.49	0.22	-0.15	-0.2525	-0.3475	-0.9	0.391041	0.263144	0.00622987	1	0.996511	0.552614
Ccser2	Q3UHI0	-0.22	0.69	0.95	0.56	0.8	-0.23	0.25	0.75	-0.62	-1.08	0.79	0.36	0.12	0.71	0.89	1.06	-0.1025	-0.6325	0.2	0.761962	0.199478	0.546596	1	0.996511	0.912406
Ccsmst1	Q6RUT7	-1.48	-0.92	-0.9	-1.32	-1.13	-1.06	-0.75	-1.08	-1.49	-0.69	-0.93	-1.61	-1.61	-0.47	-1.37	-0.86	0.15	-0.025	0.0775	0.46345	0.928073	0.799871	1	0.996755	0.970393
Cct2	P80314	-0.66	-0.63	-0.56	-0.5	-0.66	-0.81	-0.57	-0.67	-0.59	-0.51	-0.69	-0.61	-1.1	-0.46	-0.8	-0.63	-0.09	-0.0125	-0.16	0.539901	0.936124	0.441587	1	0.996755	0.883549
Cct3	P80318	-0.11	-0.22	-0.14	0.05	-0.23	-0.18	-0.28	0.14	-0.13	0.49	0.01	-0.01	-0.37	-0.06	-0.12	-0.01	-0.0325	0.195	-0.035	0.845192	0.340011	0.848867	1	0.996511	0.976225
Cct4	P80315	-0.12	-0.91	-0.71	-0.37	-0.96	-0.17	-0.59	-0.37	-0.11	0.1	-0.58	-0.17	-0.5	-0.23	-0.74	-0.96	0.005	0.3375	-0.08	0.984309	0.199536	0.761588	1	0.996511	0.963123
Cct5	P80316	-0.27	-0.49	-0.53	-0.54	-0.28	-0.38	-0.32	-0.47	-0.56	-0.24	-0.62	-0.21	-0.83	-0.41	-0.54	-0.54	0.095	0.05	-0.1225	0.532541	0.78735	0.520761	1	0.996511	0.907667
Cct6a	Q52KG9	0.37	-0.03	-0.25	-0.23	0.34	0.15	-0.34	-0.11	-0.77	0.3	-0.3	0.36	-0.87	-0.35	-0.31	-0.38	0.045	-0.0675	-0.4425	0.84314	0.826419	0.0880162	1	0.996511	0.691619
Cct7	P80313	-0.33	-0.64	-0.46	-0.44	-0.58	-0.34	-0.23	-0.24	-0.96	-0.61	-0.32	-0.38	-1.11	-1.09	-0.56	-0.28	0.12	-0.1	-0.2925	0.468743	0.62767	0.258512	1	0.996511	0.812074
Cct8	P42932	-0.25	-0.48	-0.51	-0.37	-0.43	-0.24	-0.82	-0.59	-0.85	-0.07	-0.57	-0.3	-0.77	-0.72	-0.61	-0.82	-0.1175	-0.045	-0.3275	0.521158	0.836072	0.0882147	1	0.996511	0.691619
Ccz1	Q8C1Y8	0.17	0.19	-1.01	-1.11	0.68	0.09	-0.45	-1.08	-0.12	-1.07	-0.78	0.17	0.21	0.37	-1.21	-0.67	0.25	-0.01	0.115	0.60575	0.981589	0.812456	1	0.998773	0.972642
Cd109	Q8R422	0.46	0.99	0.33	0.32	1.31	0.55	0.92	0.5	0.63	0.06	0.56	0.74	0.33	1.42	0.06	0.56	0.295	-0.0275	0.0675	0.267883	0.910244	0.840667	1	0.996744	0.976225
Cd151	O35566	3.98	1.41	0.69	0.5	1.81	3.9	1.75	1.26	1.67	1.71	1.41	2.75	2.01	1.69	2	2.43	0.535	0.24	0.3875	0.553603	0.757073	0.602728	1	0.996511	0.931061
Cd163	Q2VLH6	-0.54	1.42	-1.68	-0.73	1.77	0.9	-1.29	-1.63	1.31	-1.75	-0.26	0.6	-0.35	1.03	-0.96	-0.14	0.32	0.3575	0.2775	0.735947	0.670281	0.69316	1	0.996511	0.955729
Cd180	Q62192	-0.72	-0.48	0.35	0.09	0.26	-0.59	-0.34	0.1	-0.67	0.09	0.36	-0.33	-1.14	-0.54	-1.18	-0.59	0.0475	0.0525	-0.6725	0.878416	0.874702	0.0551613	1	0.996511	0.661738
Cd200	Q80VX2	0.46	0.73	1.14	0.79	0.74	0.7	1.29	1	-0.47	0.6	1.25	1.1	-0.43	-0.91	1.21	0.9	0.1525	-0.16	-0.5875	0.492827	0.687288	0.254573	1	0.996511	0.809524
Cd276	Q8VE98	0.63	1.94	0.67	0.71	1.02	1.01	0.83	1.04	1.63	0.26	0.78	1.5	0.52	1.75	0.22	1.01	-0.0125	0.055	-0.1125	0.968361	0.897606	0.797357	1	0.996511	0.969727
Cd2ap	Q9JLQ0	0.34	-0.24	-0.17	0.98	-0.4	-0.46	-0.29	0.55	0.34	1.28	-0.21	0.29	-0.26	0.23	-0.13	-0.26	-0.3775	0.1975	-0.3325	0.301503	0.624822	0.304789	1	0.996511	0.831662
Cd2bp2	Q9CWK3	-2.37	-3.41	-3.31	-3.96	-2.76	-3.65	-2.36	-3.17	-3.37	-1.33	-2.71	-2.63	-2.08	-1.84	-0.91	-2.17	0.2775	0.7525	1.5125	0.499556	0.159582	0.00558174	1	0.996511	0.552614
Cd34	Q64314	1.22	0.81	-1.61	-1.56	0.44	1.3	-1.68	-1.87	0.65	-0.27	-1.85	0.83	0.7	0.17	-2.44	-2.5	-0.1675	0.125	-0.7325	0.863908	0.886571	0.476701	1	0.996511	0.892174
Cd36	Q08857	-0.96	-0.12	-0.42	1.4	0.1	-0.58	1.06	1.39	-0.25	-0.83	-0.09	0.39	-0.9	-0.1	0.17	0.83	0.5175	-0.17	0.025	0.411199	0.745807	0.964991	1	0.996511	0.9927
Cd38	P56528	1.07	2.7	0.2	-0.21	2.47	0.76	2.83	0.39	0.4	-0.78	0.76	0.73	-0.4	0.08	0.92	0.86	0.6725	-0.6625	-0.575	0.409976	0.338977	0.390674	1	0.996511	0.865375
Cd44	A2APM2	1.13	1.63	0.6	0.32	1.64	0.86	0.91	0.08	0.83	0.36	0.81	1.67	0.78	1.45	1.01	1.36	-0.0475	-0.0025	0.23	0.906742	0.994796	0.494525	1	0.999285	0.89758
Cd47	A0A2R8VK70	-1.13	0.04	0.36	-0.08	1.13	0.07	0.9	0.24	-0.75	0.15	-0.08	-0.93	-0.92	0.61	-0.39	-1.11	0.7875	-0.2	-0.25	0.0698006	0.616483	0.599293	1	0.996511	0.930565
Cd47	A0A2R8W6P0	0.45	0.83	0.95	0.9	1.34	0.51	1.22	0.82	0.46	0.7	0.79	0.52	0.1	1.22	0.65	0.72	0.19	-0.165	-0.11	0.433043	0.401245	0.692782	1	0.996511	0.955729
Cd55	Q61475	-1.34	-0.86	0.3	-0.4	-2.05	-0.18	0.81	0.09	-0.45	0.3	0.21	-0.81	-1.16	-1.79	0.1	0.17	0.2425	0.3875	-0.095	0.705127	0.365373	0.862789	1	0.996511	0.977235
Cd63	A0A1W2P8C6	-0.97	0.2	-0.53	-1.47	0.53	-0.38	0.41	-1.18	0.79	-3.29	-0.07	-0.5	0.29	0.82	0.28	-0.03	0.5375	-0.075	1.0325	0.291049	0.930267	0.0236288	1	0.996755	0.624626
Cd81	P35762	0.3	0.63	0.11	0.25	0.19	0.36	0.75	0.19	0.27	-0.5	0.07	0.4	-0.05	-0.42	-0.07	0.13	0.05	-0.2625	-0.425	0.805861	0.309912	0.0738388	1	0.996511	0.670574
Cd82	P40237	1.26	1.17	1.64	0.94	0.83	1.18	1.43	0.71	-0.04	0.11	0.6	0.55	0.19	-0.91	1.31	1.68	-0.215	-0.9475	-0.685	0.375238	0.00359662	0.238776	1	0.996511	0.793481
Cd9	P40240	0.86	-0.13	1.4	1.71	-0.21	0.48	1.27	2.13	1	2.27	0.92	0.56	0.04	0.16	1.21	0.99	-0.0425	0.2275	-0.36	0.942507	0.657419	0.450364	1	0.996511	0.884817
Cd93	O89103	-1.05	-1.56	0	-0.18	-0.8	-1.26	0.04	-1.23	-1.96	-1.08	-0.42	-1.03	-1.55	-1.64	0.39	-0.67	-0.115	-0.425	-0.17	0.795882	0.363665	0.758848	1	0.996511	0.963116
Cd99	Q8VCN6	-2.41	-1.98	-1.21	-1.21	-1.92	-2.18	-1.21	-1.59	-2.84	-1.14	-0.88	-2.2	-2.28	-1.16	-1.67	-1.57	-0.0225	-0.0625	0.0325	0.948709	0.9019	0.929841	1	0.996609	0.989687
Cd99l2	A2AP74	-0.29	0.81	0.04	0.34	0.18	-0.01	0.01	-0.37	1.89	0.98	0.8	1.29	0.89	1.06	-0.42	-0.63	-0.2725	1.015	-2.35514e-16	0.322901	0.0131971	1	1	0.996511	1
Cda	P56389	0.56	1.33	0.03	0.48	1.01	0.68	0.39	-0.2	1.32	-0.73	-1.1	0.9	1.13	0.58	-0.29	-2.15	-0.13	-0.5025	-0.7825	0.716592	0.411732	0.278601	1	0.996511	0.822084
Cdc123	Q8CII2	-3.86	-2.27	-2.41	-3.41	-1.99	-4.27	-3.18	-3.45	-2.16	-4.46	-3.54	-3.21	-2.14	-3.68	-3.77	-2.6	-0.235	-0.355	-0.06	0.675114	0.533309	0.907731	1	0.996511	0.986458
Cdc16	Q8R349	-0.78	-1.12	-1	-1.12	-0.35	-0.97	-0.83	-1.29	-1.19	-0.77	-0.77	-1.11	-1.39	-0.76	-0.98	-0.89	0.145	0.045	2.35514e-16	0.533865	0.815003	1	1	0.996511	1
Cdc23	G3X8W7	0.42	-0.98	-0.03	-1.11	-0.58	0.31	-0.04	-0.49	-1.34	-1.05	0.16	0.35	-1.13	-1.23	-0.14	0.31	0.225	-0.045	-0.1225	0.577405	0.931239	0.804174	1	0.996755	0.971404
Cdc26	Q99JP4	0.82	0.93	1.13	1.65	0.3	0.36	1.36	1.54	0.64	1.59	1.26	1.01	0.46	0.13	1.08	0.88	-0.2425	-0.0075	-0.495	0.50425	0.978858	0.121474	1	0.998749	0.721448
Cdc27	A2A6Q5	-0.23	0.24	-0.31	-0.27	0.08	-0.39	-0.57	-0.53	0.17	0.89	-0.16	-0.09	-0.03	0.13	-0.67	-0.54	-0.21	0.345	-0.135	0.353543	0.243549	0.607634	1	0.996511	0.933262
Cdc34	Q8CFI2	-1.19	-0.77	-0.31	-0.96	-1.05	-0.99	-0.81	-0.89	-1.03	-0.09	-0.49	-0.82	-0.98	0.01	-0.87	-0.42	-0.1275	0.2	0.2425	0.563147	0.492448	0.435169	1	0.996511	0.881557
Cdc37	Q61081	0.29	0.14	0.38	0.26	0.49	0.55	0.29	0.32	0.06	0.11	0.25	0.24	-0.12	0.71	-0.02	0.06	0.145	-0.1025	-0.11	0.354458	0.529551	0.642481	1	0.996511	0.94365
Cdc37l1	Q9CZP7-2	-0.93	-0.3	-0.34	-0.62	-0.69	-0.63	-0.78	-0.62	-0.22	0.08	-0.63	-0.76	0.02	0.06	-0.62	-0.86	-0.1325	0.165	0.1975	0.490697	0.531407	0.501192	1	0.996511	0.901002
Cdc40	Q9DC48	0.67	0.25	0.33	0.28	-0.14	0.46	0.08	0.61	0.14	0.72	0.12	0.01	0.23	-0.01	0.5	0.16	-0.13	-0.135	-0.1625	0.559802	0.549146	0.437977	1	0.996511	0.883161
Cdc42	P60766	-0.1	-0.62	-0.14	0.21	-0.64	-0.04	-0.28	-0.1	0.25	0.63	-0.02	0.12	-0.78	-0.39	-0.35	-0.46	-0.1025	0.4075	-0.3325	0.664927	0.124935	0.185492	1	0.996511	0.776843
Cdc42	P60766-1	0.11	0.24	0.73	0.54	0.55	0.51	0.33	0.36	0.63	0.86	0.22	0.32	0.11	0.55	-0.12	0.73	0.0325	0.1025	-0.0875	0.864008	0.662426	0.743605	1	0.996511	0.959321
Cdc42bpa	D3YYN8	0.61	0.21	0.41	0.22	0.29	0.7	0.49	0.29	0.18	0.03	0.58	0.51	-0.03	0.21	0.37	0.57	0.08	-0.0375	-0.0825	0.65965	0.856132	0.700493	1	0.996511	0.956416
Cdc42bpb	Q7TT50	0.55	-0.05	0.41	0.34	0.02	0.42	0.26	0.45	0.06	0.43	0.52	0.28	-0.27	0.08	0.12	-0.05	-0.025	0.01	-0.3425	0.898792	0.961547	0.133311	1	0.996755	0.728417
Cdc42ep1	A0A0R4J0S1	0.6	1.08	1.06	0.81	0.86	0.24	0.59	0.06	0.32	0.12	0.48	0.11	-0.01	0.32	0.59	0.91	-0.45	-0.63	-0.435	0.0784439	0.0103642	0.117526	1	0.996511	0.718609
Cdc42ep2	Q8JZX9	1.55	2.67	0.82	-0.59	2.7	2.49	-0.27	0.37	1.18	0.83	-0.24	1.72	0.59	1.81	-0.31	0.32	0.21	-0.24	-0.51	0.817649	0.741169	0.49513	1	0.996511	0.89758
Cdc42ep4	Q9JM96	0.08	0.35	0.41	0.19	-0.2	0.34	0.3	0.13	0.35	0.2	0.76	0.59	0.85	0.51	0.48	-0.24	-0.115	0.2175	0.1425	0.539864	0.286863	0.596576	1	0.996511	0.929911
Cdc42se2	Q8BGH7	0.34	1.02	0.3	0.43	0.73	0.81	0.69	0.58	1.69	0.59	0.44	0.71	1.46	2.09	0.18	0.47	0.18	0.335	0.5275	0.391037	0.321454	0.257393	1	0.996511	0.812003
Cdc5l	Q6A068	1.18	-0.44	-0.09	0.28	-0.48	0.47	0	1.11	-0.02	0.14	0.27	-0.49	0.47	0.27	0.9	-0.02	0.0425	-0.2575	0.1725	0.925095	0.496338	0.657183	1	0.996511	0.948659
Cdc73	Q8JZM7	0.05	-2.09	-1.11	-0.47	-2.08	-1.03	-1.04	-0.35	-1.06	-0.33	-0.61	-1.86	0	-0.77	0.28	-1	-0.22	-0.06	0.5325	0.682277	0.909259	0.315118	1	0.996744	0.837638
Cdh10	P70408	0.68	0.99	1.09	0.98	1.08	0.76	1.04	0.89	0.87	1.4	1.21	1	0.34	1.3	0.63	0.75	0.0075	0.185	-0.18	0.964533	0.361805	0.481997	1	0.996511	0.893925
Cdh11	P55288	0.61	1.13	1.01	1.03	1.17	0.91	1.02	0.88	0.8	0.8	1.31	1.03	0.01	0.34	0.42	0.87	0.05	0.04	-0.535	0.779622	0.848887	0.05449	1	0.996511	0.661738
Cdh12	Q5RJH3	0.36	0.77	1.1	0.81	1.08	0.26	0.7	0.67	0.25	0.83	1.04	0.71	-0.38	0.34	0.07	1.03	-0.0825	-0.0525	-0.495	0.733315	0.833401	0.163845	1	0.996511	0.758352
Cdh13	Q9WTR5	1.02	0.32	0.69	0.69	0.38	1.25	2.83	1	0.65	0.03	1.08	1.52	0.2	0.5	0.68	1.32	0.685	0.14	-0.005	0.193657	0.684325	0.986341	1	0.996511	0.996154
Cdh18	E9Q9Q6	1.86	1.66	1.55	1.19	1.77	1.93	1.58	1.55	1.26	0.63	1.75	2.07	1.08	-0.08	0.79	1.99	0.1425	-0.1375	-0.62	0.481582	0.686448	0.172322	1	0.996511	0.76392
Cdh19	E9Q3A7	0.87	1.11	0.67	0.74	1.65	0.51	0.05	1.24	1.12	1.2	0.71	0.87	0.99	1.93	0.62	0.94	0.015	0.1275	0.2725	0.966402	0.526586	0.387926	1	0.996511	0.864251
Cdh2	D3YYT0	0.62	1.08	0.96	1.04	1.13	0.63	1.06	0.88	0.66	0.87	1.09	0.98	0.2	0.67	0.44	0.86	-2.35514e-16	-0.025	-0.3825	1	0.897152	0.116187	1	0.996511	0.718608
Cdh20	Q9Z0M3	0.15	1.19	0.98	0.93	1.06	0.48	1.35	1.32	0.78	1.14	1.14	0.76	-0.32	0.75	1.35	1.21	0.24	0.1425	-0.065	0.43483	0.597881	0.87745	1	0.996511	0.979626
Cdh22	Q9WTP5	1.81	1.57	2.33	1.62	2.06	1.55	0.6	1.54	-0.65	0.7	1.85	1.33	-1.36	-1.37	1.4	1.75	-0.395	-1.025	-1.7275	0.262897	0.0781426	0.0518007	1	0.996511	0.658454
Cdh4	P39038	1.61	1.68	0.89	1.19	1.79	1.52	1.37	0.95	1.18	0.73	1.05	1.68	0.56	1.04	0.92	1.03	0.065	-0.1825	-0.455	0.805167	0.523152	0.096665	1	0.996511	0.698156
Cdh5	P55284	-1.4	-0.92	-0.49	0.13	-0.27	-1.3	-0.49	-0.87	-0.78	0.54	0.25	-0.96	-0.36	-0.55	0.42	0.22	-0.0625	0.4325	0.6025	0.868106	0.362693	0.145712	1	0.996511	0.745321
Cdh6	P97326	1.33	1.58	2.43	2.07	1.29	0.96	1.81	1.66	1.39	1.95	2.26	1.35	0.52	1.6	1.05	1.77	-0.4225	-0.115	-0.6175	0.19338	0.727651	0.120952	1	0.996511	0.721448
Cdh7	Q8BM92	1.85	2.01	1.17	0.74	2.15	1.75	1.24	0.99	1.49	-0.66	1.47	1.9	0.83	1.91	0.48	1.44	0.09	-0.3925	-0.2775	0.810441	0.515711	0.510292	1	0.996511	0.903419
Cdh8	P97291	1.3	1.56	1.21	0.94	1.83	1.42	1.22	1.16	0.39	0.83	1.46	1.75	-0.59	0.12	0.16	1.22	0.155	-0.145	-1.025	0.489749	0.662079	0.0241006	1	0.996511	0.626254
Cdh9	F8WHU6	1.32	1.14	2.41	0.85	1.28	1.62	3.28	1.87	0.42	0.21	2.46	1.54	0	1	2.66	3.19	0.5825	-0.2725	0.2825	0.273626	0.637081	0.701646	1	0.996511	0.956791
Cdip1	Q9DB75	-0.27	0.05	-0.18	0.48	0.2	-0.51	-0.94	0.01	-0.13	1.35	-0.45	-0.13	0.89	1.18	-0.17	-0.62	-0.33	0.14	0.3	0.294977	0.736812	0.497035	1	0.996511	0.897918
Cdipt	Q8VDP6	-2.1	-1.28	-1.16	-1.59	-0.35	-1.66	-0.83	-1.67	-2.04	-1.41	-1.55	-1.91	-1.95	-1.5	-1.62	-1.05	0.405	-0.195	0.0025	0.28976	0.479695	0.993236	1	0.996511	0.996845
Cdk11b	A2A9P6	-1.05	-2.14	-1.19	-1.77	-1.56	-2.12	-0.94	-1.07	-2.11	-0.45	-1.86	-2.03	-1.18	-0.5	-0.1	-0.86	0.115	-0.075	0.8775	0.746189	0.864596	0.0293224	1	0.996511	0.637553
Cdk13	Q69ZA1	1.42	-0.25	-1.68	-1.23	-0.59	0.27	-1.39	-1.35	0.12	-3.86	-1.48	0.4	1.09	0.69	-2.13	-2.22	-0.33	-0.77	-0.2075	0.64636	0.479057	0.836378	1	0.996511	0.975831
Cdk14	O35495	0.83	-0.25	0.69	0.67	0.35	1.41	0.25	0.91	-1.27	-0.04	0.6	0.77	-0.88	-1.39	0.55	0.78	0.245	-0.47	-0.72	0.49192	0.349689	0.207053	1	0.996511	0.785338
Cdk16	Q04735	0.51	0.79	1.16	0.96	0.69	0.66	0.74	0.73	1.36	3.2	1.1	1.03	1.34	1.39	0.67	0.89	-0.15	0.8175	0.2175	0.420143	0.126374	0.402486	1	0.996511	0.870698
Cdk17	Q8K0D0	0.02	0.8	0.89	0.31	0.63	-0.05	0.44	0.12	-0.01	0.22	0.65	1.04	0.6	0.36	0.73	0.6	-0.22	-0.03	0.0675	0.414765	0.923566	0.789375	1	0.996755	0.968677
Cdk18	Q04899	0.02	-0.04	0.21	0.36	-0.02	-0.72	0.42	0.05	-0.09	0.45	-0.14	0.12	0.11	0.07	0.2	-0.18	-0.205	-0.0525	-0.0875	0.443655	0.80004	0.654724	1	0.996511	0.948172
Cdk19	Q8BWD8	-1.27	-2.04	1.13	0.59	-1.17	-1.44	1.38	1.21	-1.81	0.88	1.09	-1.38	-1.6	-1.58	0.86	0.5	0.3925	0.0925	-0.0575	0.682444	0.922802	0.948829	1	0.996755	0.992476
Cdk20	Q9JHU3	-0.31	-0.76	-0.56	0.46	-1.24	-0.76	-0.74	-0.85	0.12	0.26	-0.17	-0.56	-0.18	0	-0.35	-0.13	-0.605	0.205	0.1275	0.0640793	0.529882	0.66454	1	0.996511	0.949825
Cdk2ap1	F2Z4B3	-2.24	-2.37	-2.81	-3.38	-0.99	-1.94	-3.19	-3.64	-2.15	-0.21	-3.55	-2.79	-1.33	-1.18	-1.75	-2.55	0.26	0.525	0.9975	0.665057	0.455138	0.0286689	1	0.996511	0.637553
Cdk4	E9Q9E4	-0.07	0.16	-0.57	0.43	-0.42	-0.51	-0.62	-0.65	-0.23	0.36	-0.04	-0.26	-0.3	0.05	-1.31	-0.73	-0.5375	-0.03	-0.56	0.0458511	0.911767	0.143517	1	0.996744	0.742733
Cdk5	P49615	1.09	0.1	-0.28	-0.24	0.37	1.08	0.73	-0.3	-0.05	-0.45	0.04	1.03	-0.58	0.84	-0.09	-0.14	0.3025	-0.025	-0.16	0.466346	0.952993	0.702847	1	0.996755	0.956859
Cdk5r1	P61809	-0.72	-0.68	-0.3	-0.16	-0.23	-0.87	-0.41	-0.64	-0.68	0.32	-0.4	-0.68	-0.26	0.27	-0.53	-0.65	-0.0725	0.105	0.1725	0.74237	0.713054	0.529591	1	0.996511	0.908663
Cdk5r2	O35926	0.35	-0.47	-0.55	-0.74	-0.41	0.11	-0.68	-0.66	0.49	-0.26	-0.19	0.14	0.7	0.8	-1.05	-1.27	-0.0575	0.3975	0.1475	0.848319	0.210057	0.791278	1	0.996511	0.969105
Cdk5rap3	Q99LM2	-0.58	-0.42	-0.44	-0.48	-0.49	-0.44	-0.06	-0.49	0.18	-0.22	-0.7	-0.49	0.48	-0.14	0.02	-0.06	0.11	0.1725	0.555	0.513432	0.454812	0.0229541	1	0.996511	0.623147
Cdk7	A0A286YDC0	-4.72	-4.54	-2.43	-1.97	-4.02	-5	-2.2	-2.46	-4.09	-1.36	-1.57	-4.21	-2.29	-2.27	-2.49	-1.6	-0.005	0.6075	1.2525	0.995424	0.525692	0.0882559	1	0.996511	0.691619
Cdk9	Q99J95	-2.28	-3.02	-3.07	-3.17	-2.37	-2.95	-2.65	-3.02	-2.89	-2.63	-3.09	-2.12	-2.43	-1.68	-2.96	-3.21	0.1375	0.2025	0.315	0.601503	0.503864	0.421186	1	0.996511	0.875639
Cdkal1	Q91WE6-2	-0.02	0.37	-0.26	0.04	1.24	-0.66	-0.23	-0.41	0.47	0.35	-0.48	0.19	1.31	1.16	0.27	0.33	-0.0475	0.1	0.735	0.909684	0.707704	0.0396635	1	0.996511	0.658454
Cdkl5	A0A0G2JGW6	1.39	0.56	1.13	0.81	0.39	1.47	0.53	0.99	0.68	0.54	1.07	1.07	0.31	0.5	0.45	0.64	-0.1275	-0.1325	-0.4975	0.674161	0.599029	0.05977	1	0.996511	0.661738
Cdkn1b	P46414	-1.98	-1.59	-1.8	-2.29	-1.58	-2.05	-2.14	-1.74	-1.13	-1.51	-1.04	-1.57	0.07	-3.89	-0.66	-1.79	0.0375	0.6025	0.3475	0.865223	0.0268945	0.661651	1	0.996511	0.949645
Cdkn2aip	Q8BI72	-2.06	-3.15	-1.87	-1.8	-3.21	-2.68	-2.13	-2.25	-2.74	-1.12	-1.73	-2.8	-2.09	-2.68	-2.18	-2.06	-0.3475	0.1225	-0.0325	0.370844	0.799193	0.924973	1	0.996511	0.988301
Cdkn2c	Q60772	0.01	-0.24	-2.05	-2.09	0.26	-0.42	-2.41	-2.26	-1.57	-1.41	-1.86	-0.17	-0.92	-0.46	-2.24	-2.37	-0.115	-0.16	-0.405	0.884084	0.796727	0.551459	1	0.996511	0.914317
Cdr2l	A2A6T1	-0.95	-0.76	-1.23	-0.99	-0.39	-0.84	-0.59	-1.53	-0.36	-0.58	-1.11	-0.65	-0.3	-0.41	-0.91	-0.73	0.145	0.3075	0.395	0.596749	0.188846	0.101407	1	0.996511	0.698697
Cds1	P98191	-0.85	-0.66	-0.03	-0.14	0.27	-0.81	-0.16	0.47	-0.59	1.34	-0.12	-0.95	0.1	0.49	0.77	0.81	0.3625	0.34	0.9625	0.29615	0.504466	0.00696981	1	0.996511	0.552614
Cds2	Q99L43	-0.46	-0.55	-1.41	-0.71	-1.12	0.24	-0.82	-0.62	0.53	-1.09	-1.16	-0.65	1.14	-1.24	-0.22	-1.03	0.2025	0.19	0.445	0.565621	0.655131	0.417019	1	0.996511	0.875537
Cdv3	Q4VAA2	-0.14	-0.26	0.48	0.51	-0.91	-0.25	0.22	0.33	-0.32	0.44	0.56	0.03	-0.05	-0.4	0.37	-0.01	-0.3	0.03	-0.17	0.383461	0.918405	0.544736	1	0.996755	0.912212
Cebpz	A0A0R4J046	0.55	2.78	7.67	8.1	1.29	1.15	8.94	8.88	-0.39	12.49	8.5	1.54	0.7	1.25	8.7	12.02	0.29	0.76	0.8925	0.910291	0.808893	0.763861	1	0.996511	0.964134
Cebpzos	Q8BTE5	0.53	1.57	0.06	0.42	0.79	0.5	0.38	-0.34	-0.29	-0.58	0.37	0.46	0.21	0.99	-0.42	0.27	-0.3125	-0.655	-0.3825	0.423413	0.124101	0.369187	1	0.996511	0.859245
Celf1	A0A0R4J0T5	-0.16	-1.81	-1.84	-2.07	-1.36	-0.7	-1.57	-1.81	-2.89	-1.39	-1.54	-0.86	-1.8	-1.85	-1.43	-2.04	0.11	-0.2	-0.31	0.813083	0.725415	0.483174	1	0.996511	0.893925
Celf2	V9GX43	-1.38	-2.81	-1.89	-2.01	-2.64	-1.75	-1.94	-2.11	-1.28	-1.36	-1.96	-2.25	-0.32	-2.78	-1.53	-2.53	-0.0875	0.31	0.2325	0.797383	0.407834	0.690414	1	0.996511	0.955729
Celf3	A0A0G2JGE2	-1.09	-1.85	-1.68	-2.2	-1.45	-1.93	-2.15	-2.27	-1.75	-1.38	-1.75	-1.07	-1.08	-1.3	-1.61	-1.78	-0.245	0.2175	0.2625	0.413509	0.464181	0.384072	1	0.996511	0.860984
Celf4	Q7TSY6-4	-2.15	-2.4	-1.81	-1.69	-2.32	-2.52	-1.46	-1.81	-1.76	-1.17	-1.52	-2.22	-0.48	-1.79	-0.74	-1.23	-0.015	0.345	0.9525	0.958777	0.244991	0.0178934	1	0.996511	0.602211
Celf5	D3Z580	-2.2	-3.36	-2.21	-3.08	-3.79	-2.04	-2.87	-2.57	-0.31	-1.22	-2.6	-2.18	1.61	-2.21	-2.75	-2.34	-0.105	1.135	1.29	0.811983	0.0640432	0.197687	1	0.996511	0.78004
Celf6	D6RHP1	-1.32	-1	0.81	-1.1	-1.17	-0.85	-0.31	0.18	-0.95	0.37	-0.66	-0.87	-0.34	-0.38	-0.19	0.01	0.115	0.125	0.4275	0.827812	0.81549	0.374437	1	0.996511	0.859424
Celsr2	Q9R0M0	-0.05	0.14	0.11	0.09	0.38	0.22	0.1	0.11	0.44	-0.15	0.24	0.31	0.67	0.28	0.5	0.31	0.13	0.1375	0.3675	0.400261	0.477147	0.0729009	1	0.996511	0.668066
Cemip2	Q5FWI3	-0.14	0.45	-0.33	-0.19	0.96	-0.13	0.3	-0.12	0.34	-0.62	0.08	0.5	0.45	0.54	-0.14	0.14	0.305	0.1275	0.3	0.331948	0.677943	0.267772	1	0.996511	0.819502
Cend1	Q9JKC6	1.55	-0.03	0.86	1.52	-1.28	1.21	-0.49	1.12	3.05	1.08	0.87	1.64	3.59	-0.43	1.23	0.29	-0.835	0.685	0.195	0.221824	0.246662	0.819597	1	0.996511	0.972768
Cenpa	A0A0G2JGI2	1.43	1.29	2.09	2.1	0.69	1.09	1.02	1.9	-1.2	-3.57	2.2	1.17	-0.17	-1.89	2.32	2.54	-0.5525	-2.0775	-1.0275	0.117702	0.10354	0.304386	1	0.996511	0.831662
Cenpv	Q9CXS4	1.72	1.08	1.42	1.36	1.03	1.24	0.99	1.17	0.86	0.68	1.15	1.03	1.47	0.75	1.56	1.3	-0.2875	-0.465	-0.125	0.147266	0.0506948	0.626509	1	0.996511	0.939737
Cep112	Z4YKK6	-0.32	0.1	0.78	0.28	0.12	-0.37	-0.42	0.43	-0.42	-0.34	1.05	-0.29	-0.5	0.14	-0.01	1.47	-0.27	-0.21	0.065	0.383665	0.602435	0.885661	1	0.996511	0.979767
Cep128	Q8BI22	-1.05	-1.46	-0.02	-1.19	-1.47	-0.84	-1.9	-1.56	1.72	-4.27	-0.72	-0.73	2.34	-1.85	1.45	-1.84	-0.5125	-0.07	0.955	0.187216	0.951007	0.360895	1	0.996755	0.857677
Cep131	B1AXI9	-0.59	-0.28	1.32	0.62	-0.8	-0.49	0.53	0.54	0.71	2.32	0.98	-0.27	1.83	-0.26	0.89	0.84	-0.3225	0.6675	0.5575	0.533423	0.305062	0.334908	1	0.996511	0.847169
Cep135	Q6P5D4	0.71	1.15	0.86	0.4	0.27	0.89	1.1	0.22	1.05	-0.09	0.65	0.38	1.1	1.68	0.44	1.06	-0.16	-0.2825	0.29	0.564408	0.349239	0.358825	1	0.996511	0.856645
Cep170	Q6A065	0.75	0.82	0.83	0.65	0.41	0.44	0.42	0.5	0.87	0.6	0.69	1	0.96	0.6	0.76	0.31	-0.32	0.0275	-0.105	0.0463744	0.873683	0.611874	1	0.996511	0.935047
Cep170	A0A0A6YX99	1.52	0.39	0.35	0.49	2.11	1.32	0.82	-0.59	0.74	1.75	-0.04	1.58	-0.41	2.85	0.72	0.68	0.2275	0.32	0.2725	0.69499	0.499062	0.685582	1	0.996511	0.955729
Cep170b	Q80U49	0.05	0.26	0.04	-0.25	-0.1	-0.07	-0.42	-0.38	0.34	0.13	0.09	0.29	0.88	0.35	0.07	-0.61	-0.2675	0.1875	0.1475	0.16808	0.322313	0.657178	1	0.996511	0.948659
Cep41	Q99NF3	-0.81	-1.04	-1.18	-0.65	-0.82	-0.65	-0.84	-0.97	-0.91	-0.16	-0.96	-0.74	-0.98	-0.6	-1.14	-1.04	0.1	0.2275	-0.02	0.582043	0.36358	0.927095	1	0.996511	0.989293
Cep76	Q0VEJ0	-0.41	0.13	-4.79	-2.47	0.14	-0.44	-3.42	-4.53	-0.53	-2.1	-3.31	-0.51	-0.34	0.55	-3.35	-4.75	-0.1775	0.2725	-0.0875	0.900622	0.816173	0.953038	1	0.996511	0.992476
Cep97	Q9CZ62	-0.06	0.06	-0.74	-0.55	0.4	-0.4	-0.78	-0.99	-0.1	-0.81	-0.72	0.11	-0.39	1.09	-0.6	-0.7	-0.12	-0.0575	0.1725	0.730776	0.849225	0.694113	1	0.996511	0.955729
Cept1	A0A0A6YXR0	-0.8	-0.56	0.38	0.33	0.12	-0.81	0.84	1	-0.93	-0.48	0.2	-0.62	-0.65	-0.17	0.61	0.83	0.45	-0.295	0.3175	0.355803	0.437564	0.472514	1	0.996511	0.891144
Cerk	Q8K4Q7	-0.76	-1.19	-1.48	0.46	-1.39	-1.54	-0.73	0.13	-0.09	-0.56	-0.68	-1.13	1.38	-0.8	0.66	-0.43	-0.14	0.1275	0.945	0.790331	0.776958	0.143262	1	0.996511	0.742711
Cers1	P27545	1.25	0.73	1.16	1.19	1.69	1.64	2.04	1.96	1.52	1.06	1.29	1.79	1.23	1.58	2.56	2.71	0.75	0.3325	0.9375	0.00362943	0.171738	0.0315345	1	0.996511	0.641974
Cers2	Q924Z4	-0.21	-0.31	1.48	0.54	0.43	0.12	1.26	1.15	0.69	0.4	1.68	0.65	0.85	0.91	2.45	2.26	0.365	0.48	1.2425	0.438612	0.321483	0.0472216	1	0.996511	0.658454
Cers4	Q9D6J1	-0.52	0.25	-0.34	-0.41	0.28	-0.1	-0.63	-0.07	0.89	0.39	-0.65	-0.26	2.26	0.35	0.37	0.05	0.125	0.3475	1.0125	0.636378	0.361029	0.0685903	1	0.996511	0.665034
Cers6	H3BL08	0.08	0.47	0.77	0.46	0.95	0.34	1.54	2.09	-1.92	-5.54	0.84	-0.19	-1.53	-1.21	1.91	1.52	0.785	-2.1475	-0.2725	0.0662962	0.115857	0.739406	1	0.996511	0.958796
Cert1	Q9EQG9	-0.86	-1.12	-0.82	-0.94	-1.01	-1.15	-1.13	-1.08	-1.45	-0.69	-0.85	-0.92	-0.73	-1.26	-0.91	-0.87	-0.1575	-0.0425	-0.0075	0.308257	0.844554	0.969885	1	0.996511	0.992767
Ces1c	P23953	-5.41	-6.28	-3.04	-3.14	-5	-5.11	-2.82	-2.93	-5.44	-1.49	-2.8	-5.06	-4.62	-4.38	-3	-2.82	0.5025	0.77	0.7625	0.590376	0.495694	0.377308	1	0.996511	0.860984
Cetn2	Q9R1K9	0.91	1.14	0.42	0.65	1	0.68	0.48	0.37	0.87	-0.06	0.68	1.22	0.68	1.24	0.71	0.81	-0.1475	-0.1025	0.08	0.523855	0.744636	0.740806	1	0.996511	0.958796
Cetn3	A0A286YDP0	2.09	2.96	1.36	0.25	3.09	1.83	1.5	0.59	1.41	-0.22	0.94	2.23	0.51	2.98	0.81	1.21	0.0875	-0.575	-0.2875	0.900434	0.420092	0.691558	1	0.996511	0.955729
Cetn4	Q8K4K1-3	-0.3	1.64	-1.55	-0.53	-0.15	-1.35	-0.06	-1	0.02	-0.85	-0.85	0.74	0.93	1.4	-1.15	-0.92	-0.455	-0.05	0.25	0.502653	0.942935	0.764677	1	0.996755	0.964134
Cfap20	Q8BTU1	-0.73	-0.56	-1.6	-1.49	-0.85	-1.32	-0.48	-1.36	-1.13	-1.86	-1.42	-0.85	-0.39	-0.94	-0.86	-1.95	0.0925	-0.22	0.06	0.777708	0.518354	0.882082	1	0.996511	0.979767
Cfap298	Q8BL95	0.55	0.48	0.85	-0.4	0.87	0.53	0.47	0.57	2.19	0.92	0.3	0.05	2.48	1.94	0.03	0.3	0.24	0.495	0.8175	0.409505	0.344611	0.199586	1	0.996511	0.78004
Cfap300	Q8CC70	-0.27	-0.8	-0.44	-0.28	-0.64	-0.32	0.15	-0.9	0.02	-0.16	-0.91	0.01	0.08	-2.78	-0.28	-1.85	0.02	0.1875	-0.76	0.939796	0.491847	0.24304	1	0.996511	0.798789
Cfap36	Q8C6E0	-1.03	-0.8	0.42	0.13	-1.2	-0.87	0.1	0.11	-0.41	0.29	0.04	-0.91	-0.26	-0.98	0.19	-0.3	-0.145	0.0725	-0.0175	0.749183	0.862203	0.965871	1	0.996511	0.9927
Cfap410	Q8C6G1	-1.53	-0.95	-0.23	-1.01	-1.62	-1.2	-0.33	-1.22	-1.09	-1.09	-0.35	-0.58	-0.89	-1.06	-1.25	-0.33	-0.1625	0.1525	0.0475	0.657201	0.64081	0.887098	1	0.996511	0.980239
Cfap418	B1AV75	-0.76	-1.19	-0.63	-0.74	-1.55	-0.55	-1.26	-1.42	-0.59	-0.68	-0.89	-0.66	0.32	-1.63	-0.21	-1.14	-0.365	0.125	0.165	0.189035	0.523417	0.70549	1	0.996511	0.957084
Cfap74	G3UWF6	-4.1	-3.76	-2.27	-2.87	-3	-3.8	-2.89	-3.36	-2.37	-1.34	-2.18	-3.94	-1.35	-2.89	-2.75	-2.56	-0.0125	0.7925	0.8625	0.977014	0.226882	0.117003	1	0.996511	0.718608
Cfdp1	O88271	-2.32	-2.61	-3.36	-3.3	-2.25	-2.92	-3.38	-3.56	-4.6	-1.6	-3.26	-2	-3.26	-2.82	-3.4	-3.75	-0.13	0.0325	-0.41	0.726548	0.960738	0.229108	1	0.996755	0.787447
Cfh	E9Q8I0	-2.69	-2.98	-1.85	-1.75	-2.81	-2.73	-1.87	-1.46	-2	-1.03	-1.5	-2.61	-2.37	-0.85	-2.02	-1.51	0.1	0.5325	0.63	0.812575	0.237788	0.166645	1	0.996511	0.759484
Cfl1	P18760	0.4	-0.64	0.13	0.42	-0.46	0.95	0.03	0.44	-0.08	-0.25	0.14	0.24	-0.22	-0.18	-0.36	-0.17	0.1625	-0.065	-0.31	0.662788	0.818284	0.276742	1	0.996511	0.822084
Cfl2	P45591	7.57	3.34	-0.03	0.1	4.74	7.58	0.3	0.15	0.29	-0.87	-0.04	6.74	-0.8	0.17	-0.44	-0.01	0.4475	-1.215	-3.015	0.843412	0.588989	0.0864408	1	0.996511	0.691619
Cgn	D3YUW7	0.17	0.57	-0.4	-0.62	-0.58	0.13	-1.4	-0.65	1.56	1.83	-1.47	0.15	1.74	0.51	0.49	-1.32	-0.555	0.5875	0.425	0.180612	0.430002	0.503224	1	0.996511	0.901002
Cgnl1	B2RSU6	-0.41	-0.34	1.09	0.77	0.11	-0.53	1.27	-0.02	0.17	1.73	0.46	-0.2	0.6	-0.18	1.12	0.93	-0.07	0.2625	0.34	0.888105	0.619737	0.459061	1	0.996511	0.887902
Cgref1	E9QPK1	-0.02	-0.74	-1.05	-0.67	0.85	-0.04	-0.92	-1.18	0.13	0.78	-0.97	0.27	0.85	1.44	-0.16	-0.34	0.2975	0.6725	1.0675	0.533054	0.126163	0.0388164	1	0.996511	0.658454
Chac2	Q9CQG1	-1.06	-0.77	0.11	0.01	-1.21	-0.85	-0.03	0.37	-0.77	-0.49	-0.28	-0.76	-0.9	-0.3	-0.67	-0.29	-0.0025	-0.1475	-0.1125	0.995393	0.640036	0.732625	1	0.996511	0.958635
Chadl	E9Q7T7	-1.33	-1.49	-1.4	-1.79	-0.87	-1.94	-0.25	-1.45	-0.25	-0.33	-1.55	-1.32	-0.15	0.46	-0.06	-0.53	0.375	0.64	1.4325	0.316147	0.0902646	0.00038851	1	0.996511	0.270112
Champ1	Q8K327	-0.02	-0.94	-0.79	-0.28	-0.83	-0.78	-0.53	-0.66	-0.61	-0.15	-0.79	-0.77	-0.74	-0.6	-0.17	-0.6	-0.1925	-0.0725	-0.02	0.43279	0.792642	0.941339	1	0.996511	0.991085
Chat	Q8BQV2	-0.24	-0.24	-0.07	0.35	0.17	-0.1	0.27	0.31	0.19	-0.82	-0.29	0	-0.15	0.43	-0.06	0.2	0.2125	-0.18	0.155	0.304213	0.517161	0.512627	1	0.996511	0.904116
Chchd1	Q9CQA6	-1.39	-2.48	-3.88	-3.05	-1.38	-0.99	-2.57	-3.2	-2.53	-1.63	-2.8	-1.54	-2.3	-1.99	-3.03	-4.19	0.665	0.575	-0.1775	0.331786	0.322127	0.78569	1	0.996511	0.967642
Chchd10	Q7TNL9	0.55	-2.08	-2.48	-3.06	-2.9	0.51	-2.49	-2.62	-0.61	-2.45	-2.79	1.06	-0.77	-2.74	-3.09	-3.5	-0.1075	0.57	-0.7575	0.915461	0.598454	0.40921	1	0.996511	0.87457
Chchd2	Q9D1L0	-1.92	-2.53	-0.58	-0.41	-3.13	-2.41	-0.41	-0.37	-2.33	-0.07	-0.52	-1.89	-2.3	-1.65	-0.46	-0.47	-0.22	0.1575	0.14	0.779984	0.816811	0.823824	1	0.996511	0.972768
Chchd3	Q9CRB9	1.72	1.16	0.65	1.02	0.27	1.31	-0.01	0.5	1.61	0.55	0.66	1.42	1.64	0.17	0.78	0.13	-0.62	-0.0775	-0.4575	0.101963	0.82066	0.272742	1	0.996511	0.822084
Chchd3	D3Z0L4	15.87	10.82	8.29	4.03	13.13	16.44	9.31	8.32	-1.67	-0.01	8.45	15.19	-2.57	2.91	9.73	11.36	2.0475	-4.2625	-4.395	0.464949	0.31643	0.24052	1	0.996511	0.795658
Chchd4	Q8VEA4	-4.35	-3.97	-3.06	-2.96	-3.27	-3.37	-3.07	-3.02	-5.15	-1.98	-2.47	-3.61	-2.7	-4.29	-3.17	-3.15	0.4025	0.2825	0.2575	0.255572	0.69225	0.574101	1	0.996511	0.925754
Chchd5	Q9CQP3	-0.32	-0.33	0.39	1.34	-0.41	0.12	1.17	1.02	0.11	0.92	0.9	-0.2	0.53	-0.48	0.42	0.7	0.205	0.1625	0.0225	0.684331	0.722299	0.959972	1	0.996511	0.992636
Chchd6	Q91VN4	0.56	0.32	0.57	0.65	-0.01	0.65	0.07	0.33	1.09	0.55	0.58	0.66	1.22	0.17	0.41	0.34	-0.265	0.195	0.01	0.205337	0.334911	0.970351	1	0.996511	0.992767
Chchd7	Q8K2Q5	-0.44	0.78	-0.78	-1.88	-0.83	-0.14	-1.29	-1.13	0.08	-1.24	-0.67	1.3	-0.32	1.38	0.01	-0.51	-0.2675	0.4475	0.72	0.63091	0.530142	0.274009	1	0.996511	0.822084
Chd2	E9PZM4	0.35	0.25	0.72	0.16	0.36	0.27	0	0.06	0.17	0.9	0.56	-0.24	0.6	0.98	1.2	0.48	-0.1975	-0.0225	0.445	0.311395	0.937132	0.0954957	1	0.996755	0.698156
Chd3	B1AR17	-1.04	-1.14	-0.91	-1.16	-1	-1.37	-0.89	-1.31	-0.63	-0.57	-1.1	-1.05	-0.53	-0.48	-0.89	-0.58	-0.08	0.225	0.4425	0.653504	0.277037	0.0405787	1	0.996511	0.658454
Chd4	E9QAS4	-1.27	-1.84	-1.4	-1.55	-1.26	-1.76	-1.3	-1.77	-1.77	-1.11	-1.47	-1.79	-1.31	-1.56	-1.07	-1.13	-0.0075	-0.02	0.2475	0.97187	0.931305	0.273015	1	0.996755	0.822084
Chd5	E9PYU4	-0.93	-2.37	-0.49	-1.33	-1.14	-1.16	0.33	-1.83	-1.42	-0.37	-0.6	-0.61	-0.68	-1.25	0.24	0.17	0.33	0.53	0.9	0.557161	0.245554	0.100125	1	0.996511	0.698156
Chd6	A3KFM7-2	0.49	0.54	-0.78	-0.19	0.06	0.12	0.16	-0.22	1.1	-1.83	-0.28	0.67	1.76	0.84	-0.45	-0.2	0.015	-0.1	0.4725	0.962316	0.879013	0.40107	1	0.996511	0.870023
Chd8	Q09XV5	-0.04	-0.4	-1.67	-2.03	-0.39	-0.53	-1.91	-2.05	-0.16	-1.5	-2.19	-0.1	0.41	0.11	-1.48	-1.59	-0.185	0.0475	0.3975	0.756611	0.941127	0.543705	1	0.996755	0.912212
Chd9	Q8BYH8-2	-0.43	0.47	1.19	-0.41	-0.43	-0.48	-1.69	-1.86	0.23	-4.08	0.59	0.03	0.33	0.42	0.59	-0.77	-1.32	-1.0125	-0.0625	0.0265488	0.346069	0.893589	1	0.996511	0.983001
Chdh	Q8BJ64	0.65	1.53	0.73	1.04	1.09	1.11	0.78	0.83	1.24	-0.04	0.39	0.77	1.47	0.87	0.7	1.12	-0.035	-0.3975	0.0525	0.881424	0.254256	0.851583	1	0.996511	0.976225
Cherp	G5E8I8	0.19	-0.8	-0.96	-0.99	-0.63	-0.77	-0.65	-0.5	-0.88	-1.03	-0.92	-1.13	-0.56	0.06	0.12	-0.82	0.0025	-0.35	0.34	0.993028	0.25249	0.355746	1	0.996511	0.855029
Chga	P26339	-1.15	-1.72	-2	-2.51	-1.48	-1.25	-2.19	-2.31	-0.59	-1.08	-1.66	-0.59	-0.69	-0.2	-1.35	-1.94	0.0375	0.865	0.8	0.918686	0.0415913	0.101999	1	0.996511	0.700016
Chgb	P16014	0.35	0.28	-0.14	-0.24	0.34	0.41	-0.01	-0.05	0.43	0.22	-0.04	0.75	0.57	0.88	0.59	0.33	0.11	0.2775	0.53	0.611466	0.279827	0.043994	1	0.996511	0.658454
Chic1	Q8CBW7	-0.39	0.1	0.03	0.54	0.53	-0.23	0.25	-0.27	0.09	-0.02	-0.04	-0.17	0.53	1.14	0.34	0.48	-7.85046e-17	-0.105	0.5525	1	0.649745	0.0754106	1	0.996511	0.673156
Chid1	A0A0R4J242	-1.52	-1.5	-1.97	-2.08	-0.84	-1.23	-0.63	-1.89	-1.4	-2.38	-2.21	-1.77	-0.32	-0.96	-0.75	-1.26	0.62	-0.1725	0.945	0.0726293	0.541901	0.00678034	1	0.996511	0.552614
Chka	O54804-2	-0.3	-0.21	-0.37	-0.3	-0.26	-0.05	-0.13	-0.6	-1.12	0.5	-0.67	-0.6	-0.65	-1.13	-1.1	-1.12	0.035	-0.1775	-0.705	0.84126	0.605106	0.00534297	1	0.996511	0.552614
Chkb	O55229	0.89	1.04	-0.14	-0.19	0.96	0.5	-0.23	-0.2	0.7	-0.5	0.02	0.97	0.59	1.12	-0.29	-0.17	-0.1425	-0.1025	-0.0875	0.729234	0.816073	0.843204	1	0.996511	0.976225
Chl1	P70232-2	2.02	2.58	1.49	2.12	1.74	3.72	2.31	3.1	2.56	3.15	1.87	3.19	2.63	1.18	3.56	3.51	0.665	0.64	0.6675	0.16935	0.111595	0.247251	1	0.996511	0.803366
Chl1	P70232	-0.35	-0.05	-0.43	-0.31	-0.09	-0.33	-0.08	-0.07	-0.24	-0.32	-0.1	-0.08	-0.19	0.44	-0.24	-0.52	0.1425	0.1	0.1575	0.392329	0.568354	0.535885	1	0.996511	0.912212
Chm	A2AD03	0.17	-0.49	-0.13	-0.33	-0.29	0.27	-0.68	-0.43	-0.89	-0.44	-0.3	0.25	-0.59	-1.12	-0.38	-0.68	-0.0875	-0.15	-0.4975	0.733474	0.60161	0.0697028	1	0.996511	0.668066
Chml	Q9QZD5	-0.64	-0.22	-0.02	0.38	-0.78	-1.3	-0.79	-0.23	-0.62	0.38	0.29	-0.31	-1.22	0.4	-0.1	-0.62	-0.65	0.06	-0.26	0.0565008	0.851567	0.514445	1	0.996511	0.90567
Chmp1a	Q921W0	-0.38	-0.19	0.41	0.39	-0.08	-0.83	-0.15	0.5	0.25	0.73	0.52	-0.34	1.6	-0.44	0.48	0.19	-0.1975	0.2325	0.4	0.552842	0.460974	0.381511	1	0.996511	0.860984
Chmp1b1	Q99LU0	-0.74	-0.37	0.2	-0.76	-0.3	-0.7	-0.72	-0.65	-0.41	-1.85	-0.09	-0.4	0.6	-0.49	0.11	-0.13	-0.175	-0.27	0.44	0.499284	0.534311	0.199199	1	0.996511	0.78004
Chmp1b2	Q9CQD4	-1.03	-0.85	-1.37	-2.67	-0.86	-1.19	-2.91	-1.9	-0.31	-3.52	-1.45	-0.83	1.23	-1.76	-0.14	-3.16	-0.235	-0.0475	0.5225	0.676342	0.948712	0.578421	1	0.996755	0.927198
Chmp2a	Q9DB34	-0.55	-0.45	0.16	0.08	-0.62	-0.65	-0.36	0.05	-0.32	0.08	0.49	-0.45	0.97	-0.59	0.56	0.3	-0.205	0.14	0.5	0.428	0.629607	0.198717	1	0.996511	0.78004
Chmp2b	Q8BJF9	-0.59	-0.39	-0.28	-0.53	-1.19	-0.77	-1.44	-0.83	-0.25	-0.73	-0.76	-0.38	0.86	-0.61	-0.57	-1.1	-0.61	-0.0825	0.0925	0.0144843	0.676475	0.821956	1	0.996511	0.972768
Chmp3	Q9CQ10	0.16	0.25	0.21	0.68	-0.23	0.11	-0.06	0.54	0.26	-0.63	0.31	0.51	0.58	0.06	0.29	0.01	-0.235	-0.2125	-0.09	0.312629	0.469777	0.69	1	0.996511	0.955729
Chmp4b	Q9D8B3	-0.16	0.65	-0.02	-0.58	0.3	0.04	-0.63	-0.64	0.21	0.18	-0.45	0.16	1.04	0.5	-0.23	-0.45	-0.205	0.0525	0.2425	0.548342	0.863319	0.557657	1	0.996511	0.917092
Chmp5	Q9D7S9	0.13	0.37	0.51	0.36	0.04	-0.19	0.02	0.22	0.09	0.78	0.23	0.1	0.21	0.43	0.06	0.39	-0.32	-0.0425	-0.07	0.0855112	0.846134	0.715851	1	0.996511	0.958106
Chmp6	P0C0A3	1.3	0.93	1.25	1.25	0.49	1.63	1.66	1.64	0.57	0.56	1.54	1.39	0.48	-0.02	1.16	1.54	0.1725	-0.1675	-0.3925	0.567298	0.561223	0.285315	1	0.996511	0.822669
Chmp7	Q8R1T1	-0.28	-0.15	-0.35	-0.42	0.17	-0.13	-0.18	-0.28	0.4	-0.11	-0.03	-0.12	0.31	0.62	-0.67	-0.5	0.195	0.335	0.24	0.263551	0.108302	0.464024	1	0.996511	0.888267
Chn1	Q91V57	-0.82	-0.57	-0.32	-0.23	-0.2	-0.49	-0.58	-0.4	-0.65	-0.26	-0.2	-0.56	-0.73	-0.49	-0.41	-0.43	0.0675	0.0675	-0.03	0.726942	0.75254	0.886423	1	0.996511	0.979767
Chn2	Q3V2R3	0.02	-0.08	-0.63	-0.23	-0.36	-0.04	-0.24	-0.07	0.13	-0.48	-0.42	-0.24	0.23	0.33	-1.17	-0.73	0.0525	-0.0225	-0.105	0.789471	0.922092	0.784144	1	0.996755	0.967642
Chordc1	Q9D1P4	-0.99	-1.21	-0.83	-0.59	-1.07	-0.81	-0.83	-0.48	-1.33	-0.25	-0.62	-0.93	-1.32	-1.04	-0.83	-0.99	0.1075	0.1225	-0.14	0.607098	0.660151	0.525896	1	0.996511	0.908107
Chp1	P61022	1.37	1.08	1.18	1.42	0.68	1.23	1.72	1.75	0.79	0.6	1.53	1.69	0.9	0.42	1.28	1.28	0.0825	-0.11	-0.2925	0.760288	0.705084	0.264136	1	0.996511	0.816045
Chpf	Q6IQX7	-0.74	-0.45	0.72	1.32	-0.67	-0.62	-0.1	0.79	-0.11	0.08	0.32	-0.39	-0.09	-0.61	1.98	1.5	-0.3625	-0.2375	0.4825	0.510037	0.619635	0.504773	1	0.996511	0.901002
Chpf2	Q3UU43	-0.42	-1.94	-2.52	-2.82	-0.94	-0.07	-2.66	-4.44	-0.8	1.58	-3.09	-1.59	0.78	-0.05	-0.05	-0.68	-0.1025	0.95	1.925	0.917611	0.354542	0.00750329	1	0.996511	0.552614
Chpt1	Q8C025	-0.27	0.29	-0.02	-0.18	0.78	-0.65	1.2	0.13	2.98	0.59	0.04	-0.55	2.9	5.73	0.73	0.81	0.41	0.81	2.5875	0.318394	0.273565	0.0345977	1	0.996511	0.651434
Chrm1	P12657	0.54	0.95	0.56	0.67	0.87	0.82	0.14	0.19	1.67	0.7	0.39	1	1.96	1.48	1.55	0.34	-0.175	0.26	0.6525	0.464849	0.390981	0.0942081	1	0.996511	0.698156
Chrm2	Q9ERZ4	0.74	0.64	1.58	2.08	-0.49	0.59	1.32	1.87	1.64	2.85	1.64	1.47	2.06	0.16	2.21	1.77	-0.4375	0.64	0.29	0.445743	0.173739	0.594773	1	0.996511	0.929843
Chrm3	Q9ERZ3	0.3	0.58	1.39	1.05	1.08	0.3	0.95	1.1	-0.36	0.97	2.07	0.04	-0.37	0.36	0.93	1.42	0.0275	-0.15	-0.245	0.927852	0.784109	0.574675	1	0.996511	0.926139
Chrm4	P32211	0.23	0.15	0.72	0.43	-0.15	0.11	0.37	0.39	1.04	0.75	0.41	0.57	1.28	0.11	0.22	0.56	-0.2025	0.31	0.16	0.344836	0.186268	0.601883	1	0.996511	0.930802
Chrna4	B7ZBU7	0.6	1.37	0.27	0.64	1.45	0.64	0.61	0.3	0.84	0.57	0.33	0.91	0.48	1.27	0.7	0.33	0.03	-0.0575	-0.025	0.927205	0.837129	0.9372	1	0.996511	0.989767
Chrnb2	A0A0G2JG64	-0.29	-0.5	0.16	0.47	0.11	-0.75	1.03	0.54	-0.16	-0.8	0.14	-0.42	-0.92	-0.49	0.14	0.34	0.2725	-0.27	-0.1925	0.512012	0.381836	0.593984	1	0.996511	0.929843
Chst2	Q80WV3	0.23	0.14	-0.2	-0.18	0.28	-0.11	0.7	0	0.59	-0.27	-0.12	0.37	1.27	0.94	0.02	-0.18	0.22	0.145	0.515	0.353013	0.56939	0.179495	1	0.996511	0.775542
Chsy3	Q5DTK1	-1.64	-3.6	0.16	-0.47	-3.64	-1.47	-0.86	0.16	-1.69	0.97	-0.29	-3.57	-0.12	-2.45	-0.1	0.34	-0.065	0.2425	0.805	0.949788	0.832263	0.398203	1	0.996511	0.867334
Chtop	E9PW20	1.12	0.48	0.41	0.58	0.24	0.56	0.19	1	-0.03	0.98	0.47	-0.77	0.83	0.17	0.79	0.5	-0.15	-0.485	-0.075	0.562541	0.234774	0.768225	1	0.996511	0.965206
Chuk	E9Q605	-0.49	-0.67	0.06	-0.24	-0.2	-0.52	-0.01	-0.41	0.04	-0.26	-0.17	-0.32	-0.14	0.03	-0.67	-0.25	0.05	0.1575	0.0775	0.819332	0.473424	0.757822	1	0.996511	0.962717
Ciao1	Q99KN2	-1.27	-1.54	-1.57	-0.9	-1.95	-0.92	-1.17	-1.45	-0.48	-0.68	-1.07	-0.82	0.34	-1.29	1.6	-1.4	-0.0525	0.5575	1.1325	0.848362	0.0366725	0.116841	1	0.996511	0.718608
Ciao2a	Q9DCL2	0.56	0.48	-0.48	-0.64	0.8	-0.17	-0.6	-0.29	2.07	0.62	-0.59	1.51	1.37	1.75	-0.49	-0.72	-0.045	0.9225	0.4975	0.91248	0.1533	0.447109	1	0.996511	0.884817
Ciao2b	Q9D187	0.34	0.47	0.03	-0.05	0.83	-0.33	-0.2	-0.31	0.15	-0.01	-0.27	0.22	-0.78	0.37	-0.77	-0.64	-0.2	-0.175	-0.6525	0.513649	0.411329	0.0621333	1	0.996511	0.663872
Ciao3	Q7TMW6	-0.21	-0.19	-0.6	-0.56	-0.17	-0.31	-0.09	-0.25	0.14	-0.62	-0.78	-0.22	0.47	-0.57	-0.52	-0.1	0.185	0.02	0.21	0.297491	0.937524	0.466579	1	0.996755	0.888757
Ciapin1	Q8WTY4	-1.28	-1.16	-1.28	-1.74	-0.91	-0.98	-1.3	-1.59	-1.71	-0.87	-1.43	-0.81	-0.9	-1	-1.43	-1.72	0.17	0.16	0.1025	0.455909	0.556468	0.693747	1	0.996511	0.955729
Cib1	A0A0U1RPF3	1.19	1.06	1.07	0.81	0.92	0.69	0.46	0.53	0.92	0.61	0.42	0.51	0.86	0.95	0.71	-0.19	-0.3825	-0.4175	-0.45	0.0555605	0.0535356	0.147574	1	0.996511	0.746406
Cibar1	Q8BP22	-0.34	-0.05	0.08	-0.37	-0.25	-0.36	-0.99	-0.13	0.58	0.32	0.06	-0.24	1.13	-0.66	0.44	-0.01	-0.2625	0.35	0.395	0.28656	0.164415	0.316212	1	0.996511	0.838265
Cic	Q924A2	-3.24	-3.39	-2.99	-3.03	-4.64	-3.59	-3.36	-3.49	-3.44	-0.95	-2.6	-2.95	-1.78	-2.61	-2.92	-3.84	-0.6075	0.6775	0.375	0.0732333	0.206009	0.379664	1	0.996511	0.860984
Cirbp	P60824	-0.76	-2.6	-2.2	-2.58	-3.18	-2.16	-1.8	-2.41	-1.29	-2.99	-2.54	-2.71	0.14	-3.69	-1.3	-2.49	-0.3525	-0.3475	0.2	0.473903	0.518542	0.810743	1	0.996511	0.972252
Cisd1	Q91WS0	3.21	1.08	3.9	-0.23	2.22	3.37	4.98	3.1	-0.23	-0.19	3.78	2.61	-0.28	0.44	4.07	5.27	1.4275	-0.4975	0.385	0.177882	0.690315	0.79382	1	0.996511	0.969367
Cisd2	Q9CQB5	-0.23	-0.49	0.37	0.17	0.16	-0.2	0.75	0.33	-0.57	0.19	0.02	-0.32	-0.26	0.32	0.78	0.82	0.305	-0.125	0.46	0.292307	0.648516	0.179189	1	0.996511	0.775542
Cisd3	Z4YKM2	-0.83	-1.23	-0.65	-1.03	-1.09	-0.53	-1.39	-1.52	-0.73	0.83	-1.36	-0.97	0.02	-0.72	0.56	-0.55	-0.1975	0.3775	0.7625	0.457836	0.426131	0.039734	1	0.996511	0.658454
Cit	E9QL53	1.08	0.92	0.91	1.06	0.9	1.06	0.74	0.87	1.13	0.94	0.93	0.97	1.02	1.03	0.84	0.79	-0.1	-2.6986e-16	-0.0725	0.516079	1	0.680827	1	1	0.955729
Ciz1	Q3UUV0	1.42	-0.55	0.22	1.39	0.69	-0.42	0.38	-1.05	1.27	2.71	0.31	-0.01	0.44	2	-0.22	1.15	-0.72	0.45	0.2225	0.226314	0.52853	0.719743	1	0.996511	0.958398
Ckap4	Q8BMK4	-0.42	-0.73	-0.98	-0.77	0.47	-0.27	0.46	-0.36	-0.16	-0.43	-0.97	0.1	0.2	-0.01	1.23	0.83	0.8	0.36	1.2875	0.0132825	0.207551	0.00276861	1	0.996511	0.453261
Ckap5	A0A0R4J0K2	0.44	0.3	0.48	0.47	0.16	0.51	0.7	0.65	0.56	0.2	0.57	0.53	0.48	0.15	0.58	0.42	0.0825	0.0425	-0.015	0.642124	0.805737	0.935293	1	0.996511	0.989767
Ckb	Q04447	-0.42	-0.49	-1.16	-0.76	-0.65	-0.56	-0.75	-1.08	-0.52	-1.21	-1.23	-0.68	-0.88	-0.35	-1.46	-1.29	-0.0525	-0.2025	-0.2875	0.815016	0.452449	0.36391	1	0.996511	0.858475
Ckm	A0A0J9YKD4	-0.78	-0.27	-3.62	-3.09	-0.44	-0.29	-2.91	-3.09	-1.19	-1.92	-3.14	-0.76	-1.18	-1.4	-3.8	-3.52	0.2575	0.1875	-0.535	0.799193	0.832007	0.582816	1	0.996511	0.927734
Ckmt1	P30275	0.95	0.49	-0.18	0.26	0.15	0.72	-0.11	0.1	0.86	0.33	0.06	0.94	0.46	0.8	-0.18	-0.28	-0.165	0.1675	-0.18	0.578135	0.600593	0.607516	1	0.996511	0.933262
Ckmt2	Q6P8J7	-8.18	-9.1	-7	-6.95	-6.42	-10.33	-7.89	-9	-11.75	-5.3	-7.76	-7.57	-8.03	-8.5	-8.72	-8.41	-0.6025	-0.2875	-0.6075	0.4991	0.823027	0.2441	1	0.996511	0.799567
Clasp1	A0A087WRE8	0.4	0.38	-0.37	0.98	0.61	0.75	0.78	0.17	1.06	0.53	1.31	0.77	1.84	1.5	1.44	0.57	0.23	0.57	0.99	0.460523	0.106382	0.0261669	1	0.996511	0.633075
Clasp1	E9QKH0	-0.7	-0.57	-0.39	-0.53	-0.79	-0.76	-0.49	-1.1	-0.23	1.1	-1.54	-1.18	-0.28	-0.79	-1.18	-0.53	-0.2375	0.085	-0.1475	0.216878	0.876522	0.544758	1	0.996511	0.912212
Clasp1	A0A087WQ31	0.13	0.25	0.53	0.02	0.22	0.12	-0.15	0.11	0.14	-0.59	0.4	0.35	0.57	-0.25	0.49	0.22	-0.1575	-0.1575	0.025	0.392876	0.562721	0.920029	1	0.996511	0.98688
Clasp2	Q08EB5	-8.49	-7.6	-2.65	-2.53	-5.58	-8.22	-4.23	-4.85	-8.12	-2.48	-3.14	-8.15	-5.18	-5.8	-1.19	-4.05	-0.4025	-0.155	1.2625	0.803581	0.937276	0.457901	1	0.996755	0.887902
Clasp2	Q8BRT1-5	-1.18	-1.08	0.39	0.28	-0.97	-1.68	-0.21	0.12	-1.89	0.5	0.24	-1.46	-1.85	-1.78	0.16	0.52	-0.2875	-0.255	-0.34	0.595155	0.703981	0.622982	1	0.996511	0.938628
Clasp2	Q08EB6	0.74	0.64	0.62	0.49	0.56	0.8	0.53	0.47	0.59	0.77	0.79	1.03	0.64	0.52	0.6	0.55	-0.0325	0.1725	-0.045	0.835012	0.338998	0.791453	1	0.996511	0.969105
Clasp2	F7DCH5	1.34	1.2	0.91	1.11	0.56	0.9	0.31	0.71	1.57	2.06	1.14	1.69	1.41	2.2	0.54	0.13	-0.52	0.475	-0.07	0.0226626	0.0728712	0.875035	1	0.996511	0.979626
Clasrp	Q8CFC7	2.16	0.79	1.05	1.2	-0.6	0.91	0.07	1.77	1.68	2.21	0.63	0.41	2.31	2.34	2	0.04	-0.7625	-0.0675	0.3725	0.186358	0.889617	0.522296	1	0.996511	0.907667
Clcc1	Q99LI2	0.15	0.53	1.01	0.95	0.87	0.5	1.41	1.04	-0.05	0.79	0.83	0.34	0.36	-0.3	1.59	1.5	0.295	-0.1825	0.1275	0.306351	0.542151	0.78636	1	0.996511	0.967714
Clcn2	A0A338P673	-0.16	0.58	0.51	0.21	0.61	0.14	0.92	0.12	-0.68	0.41	-0.12	-0.08	-0.27	0.06	0.05	0.73	0.1625	-0.4025	-0.1425	0.54336	0.187569	0.622197	1	0.996511	0.938628
Clcn3	Q8K4W8	0.07	0.19	0.39	0.68	0.13	0.95	-0.56	0.56	0.41	0	-0.46	0.47	0.39	1.6	-0.19	-0.08	-0.0625	-0.2275	0.0975	0.853449	0.407966	0.813495	1	0.996511	0.972768
Clcn3	A0A6Q6Q7B9	-0.28	0.4	0.56	0.15	0.6	0.02	0.11	0.07	-0.2	0.12	0.39	-0.15	0.01	0.65	0.11	0.18	-0.0075	-0.1675	0.03	0.975262	0.510131	0.908224	1	0.996511	0.986458
Clcn4	Q3LRV6	-0.04	0.28	0.42	0.37	0.63	0.04	0.4	0.45	0.11	0.1	0.41	0.09	0	0.51	0.19	0.11	0.1225	-0.08	-0.055	0.53697	0.671938	0.793084	1	0.996511	0.96933
Clcn5	Q9WVD4	-1.3	-0.58	-0.89	-1.22	-0.19	-0.93	-0.65	-1.55	-1.86	-2.98	-0.87	-1.14	-1.79	-1.2	-1.53	-1.22	0.1675	-0.715	-0.4375	0.604868	0.152641	0.107773	1	0.996511	0.706141
Clcn6	A2A7F6	-0.02	0.21	-0.18	-0.17	0.25	0.15	0.16	0	0.26	-0.01	-0.25	0.17	0.23	0.14	-0.05	-0.13	0.18	0.0825	0.0875	0.288207	0.67622	0.655482	1	0.996511	0.94818
Clcn7	F6SUM2	0.05	-0.15	-0.7	-0.44	-0.56	0.72	0	-0.63	0.6	-0.46	-0.2	0.31	1.48	-1.05	-0.38	-0.55	0.1925	0.3725	0.185	0.576127	0.231877	0.729981	1	0.996511	0.958635
Cldn1	O88551	0.76	0.42	1.27	1.08	1.08	0.8	1.36	-0.08	0.96	0.8	1.07	0.22	0.43	1.21	0.49	0.57	-0.0925	-0.12	-0.2075	0.791473	0.667995	0.466077	1	0.996511	0.888548
Cldn10	Q9Z0S6-6	0.89	1.35	1.09	0.67	0.92	1.17	0.97	0.89	0.81	1.22	1.08	1.09	1.13	0.37	0.65	0.2	-0.0125	0.05	-0.4125	0.948617	0.81276	0.156348	1	0.996511	0.751493
Cldn11	Q60771	0.18	-1.81	0.02	-1.42	-1.28	-0.45	-0.11	-1.47	-2.81	-1.2	-1.51	-1.34	-1.57	-3.74	-0.43	0.08	-0.07	-0.9575	-0.6575	0.89848	0.122893	0.464815	1	0.996511	0.888267
Cldn12	Q9ET43	-1.91	-1.21	-3.34	-3.04	-1.22	-1.45	-2.87	-2.92	-1.84	-1.43	-2.77	-1.86	-2.51	-0.73	-3.57	-3.54	0.26	0.4	-0.2125	0.672223	0.456463	0.777402	1	0.996511	0.967289
Cldn3	Q9Z0G9-2	4.55	-0.89	-1.61	-2.2	1.47	-1.38	-2.46	-3.25	3.72	4.37	-2.87	8.52	-3.5	-4.66	-0.96	-3.99	-1.3675	3.4725	-3.24	0.420299	0.190765	0.0627217	1	0.996511	0.66433
Cldn5	O54942	-2.39	-2.13	-0.32	-1.86	-3.44	-0.88	-4.1	-2.69	0.97	-0.64	-1.05	-2.13	2.08	-3.46	-1.55	-1.8	-1.1025	0.9625	0.4925	0.169715	0.204449	0.661899	1	0.996511	0.949645
Cldnd1	Q9CQX5	0.77	0.81	1.43	0.88	1.03	1.1	2.33	1.1	0.14	0.21	1.69	1.07	-1.24	0.81	1.6	1.75	0.4175	-0.195	-0.2425	0.237856	0.615808	0.707075	1	0.996511	0.957157
Clec16a	Z4YLG3	0.53	-0.16	0.3	0.12	0.21	0.65	0.36	0.03	-0.17	-0.48	0.42	0.49	-0.48	-0.44	0.23	0.41	0.115	-0.1325	-0.2675	0.603481	0.645212	0.365442	1	0.996511	0.858475
Clec2l	P0C7M9	-0.38	-0.3	-0.17	0.07	-0.24	-0.11	-0.16	-0.3	-0.04	-0.02	-0.05	-0.22	-0.15	0.07	-0.36	-0.85	-0.0075	0.1125	-0.1275	0.963639	0.531165	0.615831	1	0.996511	0.93691
Clgn	P52194	-0.16	0.15	-0.58	-1.14	-0.39	-0.23	-0.41	-2.01	0.49	-0.32	-0.6	1.12	-0.01	0.56	-0.2	-0.27	-0.3275	0.605	0.4525	0.489315	0.203898	0.203253	1	0.996511	0.782817
Clic1	Q9Z1Q5	-0.28	-1.38	-1.34	-1.04	-1.05	-0.77	-1.78	-1.52	-0.46	-0.62	-1.46	-0.68	-1.02	-0.68	-2.01	-1.85	-0.27	0.205	-0.38	0.424763	0.545256	0.350338	1	0.996511	0.853281
Clic4	Q9QYB1	0.62	0.42	0.73	0.02	0.69	0.05	1.16	0.13	0.16	0.08	0.37	0.32	-0.22	0.57	0.66	0.91	0.06	-0.215	0.0325	0.841921	0.325418	0.914299	1	0.996511	0.986458
Clic5	A0A668KLB7	-0.42	0.06	-0.56	-0.02	0.44	-0.24	0.14	-0.2	-1.07	-2.58	-0.01	-0.18	-1.21	-1.46	-0.67	0.29	0.27	-0.725	-0.5275	0.271999	0.217038	0.210629	1	0.996511	0.786218
Clic6	Q8BHB9	-2.87	-2.62	-2.36	-2.2	-2.99	-3.58	-2.94	-3.75	-3.36	-0.67	-5.28	-2.92	-1.85	-2.46	-2.1	-2.04	-0.8025	-0.545	0.4	0.0128861	0.532873	0.117202	1	0.996511	0.718609
Clint1	Q5SUH7	1.2	-0.61	0.21	-0.81	-0.5	-0.04	-1.06	-1.42	-2.2	-1.97	-0.27	0.79	0.16	-4.81	0.08	-0.24	-0.7525	-0.91	-1.2	0.163157	0.254797	0.312079	1	0.996511	0.834523
Clint1	Q5SUH6	0.72	0.77	-0.04	0.01	0.85	0.55	0.07	0.03	0.92	0.09	0.16	0.95	0.58	1.43	0.05	-0.14	0.01	0.165	0.115	0.972897	0.610248	0.773903	1	0.996511	0.966062
Clip1	D3Z3M7	0.02	0.59	-0.24	0.22	-0.89	0.79	-1.09	-0.39	1.31	2.55	1.02	0.04	0.57	-1.8	-0.05	0.65	-0.5425	1.0825	-0.305	0.22575	0.0582147	0.582406	1	0.996511	0.927734
Clip1	Q922J3	0.03	0.57	0.58	0.63	-0.02	-0.75	-0.1	-0.14	-0.01	0.67	0.67	-0.02	0.64	1.35	0.64	-0.88	-0.705	-0.125	-0.015	0.0147977	0.635095	0.97408	1	0.996511	0.992977
Clip1	D3Z2Z1	0.13	-0.02	0.34	-0.09	0.02	-0.04	0.46	-0.13	-0.23	0.35	0.27	0.14	-0.14	0.2	0.17	0.15	-0.0125	0.0425	0.005	0.949305	0.836254	0.979552	1	0.996511	0.994502
Clip2	Q9Z0H8	0.83	0.5	0.47	0.39	0.52	0.61	0.5	0.06	0.54	0.99	0.39	0.99	0.38	0.79	0.48	0.27	-0.125	0.18	-0.0675	0.523165	0.422219	0.746113	1	0.996511	0.960124
Clip3	B9EHT4	0.91	0.73	0.57	0.55	1.18	1.16	0.76	0.95	0.47	0.73	1	1.39	0.54	0.56	1.05	0.79	0.3225	0.2075	0.045	0.0960081	0.399305	0.827764	1	0.996511	0.973757
Clip4	A0A2R8VHV0	-1.06	-0.29	-0.84	-1.06	-0.24	-0.93	-1.06	-1.51	0.38	-0.89	-1.3	-0.7	0.42	-0.07	-0.98	-1.27	-0.1225	0.185	0.3375	0.697385	0.63418	0.424638	1	0.996511	0.876965
Clmn	Q8C5W0-4	0.02	0.31	0.48	0.36	-0.12	0.12	0.44	0.29	0.85	0.64	0.5	0.28	1.19	0.25	0.76	0.6	-0.11	0.275	0.4075	0.570644	0.197674	0.131507	1	0.996511	0.726398
Clmp	Q8R373	0.76	1.03	0.74	0.75	0.57	0.43	-0.32	0.59	1.3	0.73	0.12	1.06	1.48	1.03	0.66	0	-0.5025	-0.0175	-0.0275	0.0634695	0.949762	0.932593	1	0.996755	0.989713
Cln6	D6RE34	0.04	0.37	0.47	-0.11	1.82	-0.77	0.53	0.28	0.43	-0.8	0.59	0.6	-0.11	1.36	0.78	1.06	0.2725	0.0125	0.58	0.593537	0.971908	0.11936	1	0.997515	0.721448
Cln8	Q9QUK3	-0.29	-0.18	-0.56	-0.11	0.26	0.5	0.94	0.16	0.84	-0.76	-0.39	0.43	2.08	0.94	0	-0.78	0.75	0.315	0.845	0.00805569	0.403026	0.166507	1	0.996511	0.759484
Clns1a	Q923F1	-0.42	-0.27	-0.05	-0.05	-0.1	-0.7	0.03	0	-0.29	-0.04	0.1	-0.15	-0.65	0.29	-0.91	-0.15	0.005	0.1025	-0.1575	0.981697	0.581865	0.597599	1	0.996511	0.930093
Clock	A0A0J9YU61	-4.12	-2.33	-4.21	-2.65	-3	-4.13	-3.58	-3.43	-1.4	-0.78	-3.28	-2.65	-0.62	-0.12	-2.37	-4.1	-0.2075	1.3	1.525	0.679061	0.0847048	0.125296	1	0.996511	0.721448
Clpb	Q60649	0.17	0.18	0.03	0.43	-0.19	0.21	0.09	0.18	0.44	0.38	0.44	0.28	0.72	0.11	0.14	0.07	-0.13	0.1825	0.0575	0.460998	0.2988	0.797293	1	0.996511	0.969727
Clpp	O88696	1.09	1.1	0.5	0.76	0.6	1	0.64	0.45	0.74	0.64	0.36	0.84	0.38	1.11	0.39	0.78	-0.19	-0.2175	-0.1975	0.382434	0.32991	0.450398	1	0.996511	0.884817
Clptm1	Q8VBZ3	-0.23	-0.17	0.18	0.19	0.18	-0.11	0.75	0.36	0.03	0.51	0.45	0.03	0.4	0.7	1.01	0.87	0.3025	0.2625	0.7525	0.212625	0.238499	0.00773583	1	0.996511	0.555152
Clptm1l	Q8BXA5	-0.03	0.05	-0.25	0.21	0.03	-0.2	0.37	0.18	-0.67	0.1	-0.02	-0.23	-0.35	-0.38	0.43	0.4	0.1	-0.2	0.03	0.604411	0.390762	0.911334	1	0.996511	0.986458
Clpx	Q9JHS4	0.04	0.08	0.57	0.76	-0.4	-0.01	0.53	0.56	0.56	0.38	0.69	0.04	0.51	0.3	0.43	0.43	-0.1925	0.055	0.055	0.51495	0.82653	0.810588	1	0.996511	0.972222
Clstn1	Q9EPL2-2	-3.21	-3.54	-1.93	-2.59	-2.73	-2.68	-1.81	-2.11	-4.04	-1.01	-2.44	-2.76	-3.31	-2.24	-2.7	-2.37	0.485	0.255	0.1625	0.241805	0.697553	0.693528	1	0.996511	0.955729
Clstn1	Q9EPL2	-0.59	-0.83	-1.08	-1.22	-0.3	-0.62	-0.65	-1.03	-0.87	-1.35	-0.57	-0.34	-0.61	-1.18	-1.03	-0.9	0.28	0.1475	7.85046e-17	0.235005	0.59226	1	1	0.996511	1
Clstn2	Q9ER65-2	-1.39	-0.08	-0.64	-0.88	-0.87	-2.13	-0.3	-0.75	-2.22	-0.95	-0.69	-1.21	-1.26	-0.86	-0.43	-0.66	-0.265	-0.52	-0.055	0.555364	0.227015	0.866778	1	0.996511	0.978305
Clstn3	D3Z601	-0.3	-0.71	-1.03	-1.11	-0.58	-0.48	-0.45	-0.56	-0.45	-0.66	-0.95	-0.25	0.2	-0.17	-0.11	-0.41	0.27	0.21	0.665	0.226822	0.423964	0.0264285	1	0.996511	0.633866
Clta	B1AWD8	2.08	1.81	1.1	0.4	2.28	1.73	0.98	0.82	-0.28	-2.63	0.93	1.81	0.03	-0.94	1.07	1.14	0.105	-1.39	-1.0225	0.823597	0.161286	0.100703	1	0.996511	0.698156
Clta	B1AWE0	1.72	1.31	1.84	2.27	1.27	1.37	1.31	2.17	0.45	0.39	1.55	1.34	0.6	-0.34	2	1.79	-0.255	-0.8525	-0.7725	0.392337	0.0362078	0.175264	1	0.996511	0.769808
Cltb	Q6IRU5-2	0.37	1.4	1.2	1.56	0.66	0.38	-0.05	1.08	1.98	2.91	1.44	1.68	1.59	0.91	1.77	1.04	-0.615	0.87	0.195	0.10101	0.0539205	0.567543	1	0.996511	0.921806
Cltb	Q6IRU5	1.31	1.14	1.83	2.63	1.4	0.85	1.42	2.22	1.21	2.49	1.91	1.38	1.14	1.6	2.13	1.76	-0.255	0.02	-0.07	0.539844	0.961953	0.85457	1	0.996755	0.976225
Cltc	Q68FD5	0.7	0.33	0.79	0.75	0.67	0.88	1.16	1.12	0.03	-0.08	0.92	0.6	-0.51	-0.12	0.61	0.97	0.315	-0.275	-0.405	0.129216	0.329545	0.266432	1	0.996511	0.818107
Clu	Q06890	-0.1	0.1	0.11	-0.27	0.7	0.43	-0.23	0.55	-0.71	-0.35	0.48	0.89	-0.59	-0.16	0.15	0.23	0.4025	0.1175	-0.0525	0.120821	0.749817	0.829534	1	0.996511	0.973939
Cluh	A0A0R4J140	-1.35	-1.53	-1.21	-1.29	-1.48	-0.77	-1.01	-1.27	-1.23	-0.58	-1.15	-1.09	-0.91	-0.83	-1.45	-1.32	0.2125	0.3325	0.2175	0.306673	0.13499	0.333517	1	0.996511	0.845601
Clvs1	Q9D4C9	0.51	0.1	0.36	-0.02	0.28	0.43	0.33	-0.03	-0.19	0.13	0.34	0.62	-0.23	0.49	-0.2	0.37	0.015	-0.0125	-0.13	0.938001	0.958023	0.612309	1	0.996755	0.935166
Clvs2	Q8BG92	-0.37	0.11	-0.09	-0.04	0.14	-0.21	-0.34	-0.26	-0.24	0.01	0.06	-0.16	-0.38	0.44	-0.51	-0.36	-0.07	0.015	-0.105	0.708542	0.935154	0.693495	1	0.996755	0.955729
Clybl	Q8R4N0	0.91	1.01	0.88	1.23	0.73	0.7	1.09	1	0.65	1.45	0.63	0.62	0.6	0.94	0.63	0.68	-0.1275	-0.17	-0.295	0.472116	0.493186	0.145284	1	0.996511	0.745321
Cmas	A0A0R4J0B4	-4.48	-3.42	-3.1	-3.9	-3.6	-5.1	-3.44	-4.41	-3.61	-1.53	-3.3	-2.09	-4.4	-2.34	-3.38	-3.8	-0.4125	1.0925	0.245	0.375462	0.0670257	0.621498	1	0.996511	0.938628
Cmbl	Q8R1G2	-0.19	-0.52	-0.52	-0.35	-0.83	-0.41	0.04	-0.48	-1.21	-0.54	-0.53	-0.63	-1.23	-1.15	0.05	-0.51	-0.025	-0.3325	-0.315	0.909191	0.154461	0.335347	1	0.996511	0.847442
Cmc1	Q9CPZ8	0.04	0.27	-0.86	-1.03	1	0.25	-0.67	-1.05	0.38	-2.25	-1.52	-0.08	-0.46	0.16	-1.51	-1.29	0.2775	-0.4725	-0.38	0.59543	0.46301	0.429419	1	0.996511	0.879165
Cmc2	Q8K199	0.03	-0.31	-0.73	-1.17	-0.47	-0.05	-1.07	-1.47	-0.27	-0.38	-1.57	-0.31	0.3	0.1	-1.49	-2.15	-0.22	-0.0875	-0.265	0.572865	0.822868	0.659902	1	0.996511	0.949645
Cmc4	Q61908	-3.45	-2.72	-2.05	-1.69	-2.39	-2.85	-1.84	-2.49	-2.58	-1.88	-1.85	-2.88	-0.43	-2.75	-1.52	-1.32	0.085	0.18	0.9725	0.837352	0.683237	0.11362	1	0.996511	0.716416
Cmip	Q9D486	1.12	0.57	0.81	-0.04	0.27	1.33	0.61	0.12	0.26	-0.61	0.55	1.13	0.8	0.19	0.59	0.78	-0.0325	-0.2825	-0.025	0.926059	0.503018	0.932963	1	0.996511	0.989767
Cmpk1	Q9DBP5	0.15	0.17	0.25	0.23	-0.33	-0.18	0.2	0.49	-0.27	-0.32	0.4	0.31	-0.94	-0.42	-0.34	-0.45	-0.155	-0.17	-0.7375	0.474717	0.457475	0.00528426	1	0.996511	0.552614
Cmpk2	Q3U5Q7	0.17	0.03	0.86	1.55	-0.26	0.08	0.68	1.28	0.17	1.03	1.12	-0.26	-0.02	0.19	0.87	0.52	-0.2075	-0.1375	-0.2625	0.649093	0.763082	0.50471	1	0.996511	0.901002
Cmss1	Q9CZT6	-0.51	-1.28	-2.17	-1.07	-0.67	-0.61	-0.6	-1.88	-0.16	-1.88	-0.93	-0.08	-0.45	0.18	-1.31	-1.65	0.3175	0.495	0.45	0.47287	0.340108	0.381921	1	0.996511	0.860984
Cmtm4	Q8CJ61	0.21	1.15	0.91	1.21	0.81	0.49	0.63	0.9	1	1.26	0.83	1.05	0.93	1.39	0.94	0.9	-0.1625	0.165	0.17	0.531708	0.536192	0.545923	1	0.996511	0.912321
Cmtm5	Q45TP8	0.2	0.04	0.62	0.28	0.69	0.37	0.95	0.3	0.47	0.58	0.64	0.19	0.38	1.05	0.64	0.36	0.2925	0.185	0.3225	0.203115	0.376988	0.202817	1	0.996511	0.782817
Cmtr1	Q9DBC3	-3.73	-3.62	-3.51	-3.88	-3.28	-4.5	-3.49	-4	-3.65	-1.96	-3.55	-3.36	-2.82	-3.22	-4.06	-4.18	-0.1325	0.555	0.115	0.644774	0.176373	0.735008	1	0.996511	0.958635
Cnbp	P53996-3	-2.55	-4.84	-4.4	-5.55	-4.64	-2.47	-4.3	-4.15	-4.17	-3.5	-4.58	-1.9	-2.61	-5.65	-2.17	-4.3	0.445	0.7975	0.6525	0.544457	0.325919	0.484238	1	0.996511	0.894266
Cndp2	Q9D1A2	-0.54	-0.47	-0.39	-0.07	-0.29	-0.7	0.32	-0.12	-0.52	-0.27	-0.16	-0.43	-0.72	0.04	-0.32	-0.22	0.17	0.0225	0.0625	0.499006	0.905261	0.788026	1	0.996744	0.968587
Cnep1r1	D3Z6J3	0.7	0.67	0.61	0.92	0.88	0.99	0.99	0.87	0.35	1	0.46	0.44	0.43	1.35	0.58	0.99	0.2075	-0.1625	0.1125	0.191396	0.441303	0.656361	1	0.996511	0.948332
Cnih1	D6RGU4	-3.98	-3.64	-4.7	-5.26	-3.52	-3.73	-4.33	-5.48	-3.39	-4.95	-4.68	-4.35	-2.93	-2.73	-5.72	-4.66	0.13	0.0525	0.385	0.804398	0.910295	0.599149	1	0.996744	0.930565
Cnih2	A0A494B9S6	3.9	2.87	3.37	3.84	0.93	3.74	3.78	4.88	4.69	4.95	4.01	3.35	2.61	3.45	3.47	3.1	-0.1625	0.755	-0.3375	0.837236	0.0942404	0.306691	1	0.996511	0.832533
Cnih3	G3XA11	-1.83	-2.59	-2.35	-0.63	-2.66	-0.42	-2.36	-1.3	-0.63	0.27	-1.39	-0.34	0.44	-0.35	-2.6	-2.09	0.165	1.3275	0.7	0.788188	0.0286179	0.367609	1	0.996511	0.859245
Cnih4	A0A0A6YW87	0.2	1.17	0.33	0.2	1.17	0.03	0.65	0.31	0.2	0.08	0.18	0.59	-0.34	0.71	-0.19	0.41	0.065	-0.2125	-0.3275	0.843582	0.445482	0.349642	1	0.996511	0.85327
Cnksr2	Q80YA9	0.14	0.27	0.1	0.12	0.23	0.24	0.29	0.26	0.27	0.32	0.63	0.64	0.55	0.58	0.01	0.02	0.0975	0.3075	0.1325	0.490624	0.108655	0.545286	1	0.996511	0.912212
Cnn1	Q08091	-3.39	-2.94	-4.85	-3.76	-3.18	-3.4	-3.63	-4.05	-2.61	-4.55	-4.05	-3	-2.3	-3.55	-4.14	-4.32	0.17	0.1825	0.1575	0.686991	0.744972	0.780252	1	0.996511	0.9676
Cnn2	Q08093	-2.48	-3	-2.04	-2.49	-1.81	-2.66	-2.23	-2.76	-1.8	-1.38	-1.7	-2.05	-2.15	-1.81	-2.53	-2.51	0.1375	0.77	0.2525	0.640571	0.0151939	0.379241	1	0.996511	0.860984
Cnn3	Q9DAW9	-0.55	-0.35	-0.41	-0.09	-0.87	-0.36	-1.35	-0.51	0.57	-0.06	-0.21	-0.12	0.78	-0.26	-0.59	-0.65	-0.4225	0.395	0.17	0.120917	0.117352	0.623685	1	0.996511	0.938628
Cnnm1	A0A286YDL2	1.04	1.28	1.13	0.95	1.01	0.88	1.11	1.01	0.89	1.29	1.22	1.08	0.48	1.18	0.94	1.09	-0.0975	0.02	-0.1775	0.531903	0.911267	0.430694	1	0.996744	0.879165
Cnnm2	Q3TWN3	0.93	1.14	0.51	0.51	1	0.78	0.86	0.32	1.21	-0.14	0.66	0.9	0.59	1.39	0.11	0.46	-0.0325	-0.115	-0.135	0.8893	0.72611	0.674155	1	0.996511	0.952944
Cnnm3	Q32NY4	1.5	1.15	0.8	0.56	1.49	1.51	1.25	0.72	0.92	0.75	0.71	1.67	0.53	0.8	0.93	0.64	0.24	0.01	-0.2775	0.400009	0.97403	0.292763	1	0.997515	0.825612
Cnnm4	Q69ZF7	0.22	0.61	1.2	1.06	1.3	0.02	1.09	1.36	0.45	1.07	1.57	0.87	-0.09	0.9	1.26	1.19	0.17	0.2175	0.0425	0.64489	0.505152	0.909566	1	0.996511	0.986458
Cnot1	Q6ZQ08	-0.74	-0.81	-0.53	-0.69	-0.35	-0.89	-0.67	-0.85	-0.82	0.28	-0.67	-0.75	-0.55	-0.42	-0.67	-0.56	0.0025	0.2025	0.1425	0.988972	0.473385	0.427682	1	0.996511	0.879165
Cnot10	Q8BH15-2	-1.07	-1.1	-1.19	-0.51	-1.24	-1.08	-0.89	-1.32	-1.73	1.43	-1.22	-0.07	-0.5	-2.04	0.29	-0.22	-0.165	0.57	0.35	0.439673	0.394763	0.48198	1	0.996511	0.893925
Cnot10	Q8BH15	-0.86	-1	-0.83	-0.86	-0.8	-0.69	-1.03	-1.16	-1.17	0.03	-0.76	-0.57	-0.7	-1.41	-0.79	-0.66	-0.0325	0.27	-0.0025	0.846663	0.329166	0.99118	1	0.996511	0.996154
Cnot11	Q9CWN7	-1.3	-1.26	0.03	-0.03	-1.36	-1.62	0.14	-0.28	-0.66	0.01	-0.04	-1.03	-0.73	-0.62	-0.6	-0.04	-0.14	0.21	0.1425	0.786609	0.622647	0.714849	1	0.996511	0.958106
Cnot2	Q8C5L3-2	-1.4	-1.4	-1.01	-1.75	-1.35	-1.45	-2.5	-2.43	-0.15	-2.15	-1.84	-1.43	0.92	-1.62	-0.69	-2.09	-0.5425	-0.0025	0.52	0.130864	0.995448	0.412884	1	0.999285	0.874811
Cnot3	Q8K0V4	-0.94	-0.66	-0.75	-0.83	-0.66	-1.4	-0.93	-0.97	-1.16	-0.47	-0.8	-0.8	-1.33	-0.59	-0.66	-0.81	-0.195	-0.0125	-0.0525	0.339003	0.950483	0.815737	1	0.996755	0.972768
Cnot4	Q05BG1	-0.81	-0.56	-0.4	-0.63	-0.52	-0.8	-0.4	-0.73	-0.69	-0.4	-0.82	-0.66	-0.65	-0.33	-0.7	-1.08	-0.0125	-0.0425	-0.09	0.942899	0.817801	0.688992	1	0.996511	0.955729
Cnot6l	Q8VEG6-2	1.93	1.21	0.17	-0.25	2.55	1.7	0.08	-0.24	0.45	-1.01	0.04	2.5	-1.11	0.74	-0.7	-0.01	0.2575	-0.27	-1.035	0.731235	0.736887	0.10569	1	0.996511	0.703417
Cnot7	Q60809	-1.54	-1.16	-1.74	-2.27	-0.68	-1.44	-1.61	-2.27	-1.03	-2.26	-1.69	-1.5	-1.18	-0.68	-2.57	-1.92	0.1775	0.0575	0.09	0.64242	0.865398	0.841187	1	0.996511	0.976225
Cnot9	Q9JKY0	-1.41	-1.01	-1.43	-1.27	-0.78	-1.4	-1.12	-1.68	-1.32	-1.33	-1.44	-1.39	-1.59	-0.58	-1.94	-1.45	0.035	-0.09	-0.11	0.880845	0.607401	0.726298	1	0.996511	0.958398
Cnp	P16330	0.86	1.07	1.49	1.08	1.09	0.19	1.47	0.87	0.21	0.49	1.04	0.43	-0.23	0.43	1.16	1.31	-0.22	-0.5825	-0.4575	0.466904	0.039348	0.238331	1	0.996511	0.793335
Cnpy2	Q9QXT0	-0.33	-0.59	-0.85	-0.73	-0.35	-0.58	-0.54	-1.06	-0.2	-0.18	-1.14	-0.19	0.77	0.34	0.31	-0.32	-0.0075	0.1975	0.9	0.972022	0.480908	0.00904319	1	0.996511	0.563386
Cnpy3	Q9DAU1	-0.35	-0.57	-0.75	-1.15	0.31	-0.77	-0.56	-1.3	-1.28	-0.43	-1.2	-0.76	-0.71	0.22	0.06	-0.09	0.125	-0.2125	0.575	0.728728	0.447649	0.068873	1	0.996511	0.666991
Cnpy4	Q8BQ47	0.75	1.2	1.05	0.88	1.22	0.92	1.82	1.38	0.72	0.69	0.68	1.43	0.52	1.3	1.35	1.24	0.365	-0.09	0.1325	0.140687	0.705174	0.601326	1	0.996511	0.930802
Cnr1	P47746	-0.28	-0.04	0.15	0.14	-0.27	0.06	0.06	0.03	-0.05	-0.08	-0.11	-0.03	0.03	0.28	-0.38	-0.43	-0.0225	-0.06	-0.1175	0.898525	0.731775	0.623319	1	0.996511	0.938628
Cnrip1	Q5M8N0	0.43	0.01	0.31	0.25	0	0.49	0.42	0.33	0.11	-0.25	0.04	0.01	-0.22	0.35	-0.48	-0.4	0.06	-0.2725	-0.4375	0.743532	0.160682	0.100154	1	0.996511	0.698156
Cnst	Q8CBC4	-0.12	0.24	0.26	-0.01	0.37	-0.55	0.01	-0.07	-0.54	0.38	-0.43	-0.22	0.29	0.09	0.45	0.02	-0.1525	-0.295	0.12	0.513563	0.255869	0.554919	1	0.996511	0.916796
Cntfr	O88507	0.35	-0.07	0.32	0.41	-0.04	0.57	0.41	0.23	0.07	-0.13	0.48	0.51	0.09	0.32	-0.08	-0.81	0.04	-0.02	-0.3725	0.843214	0.929306	0.214378	1	0.996755	0.786931
Cntn1	P12960	0.69	0.75	0.68	0.47	0.93	0.66	0.97	0.65	0.37	0.46	0.75	0.88	0.17	0.85	0.55	0.48	0.155	-0.0325	-0.135	0.356697	0.864831	0.525991	1	0.996511	0.908107
Cntn2	Q61330	0.95	1.01	1.08	1.16	1.23	0.83	0.91	0.77	0.39	0.71	0.68	0.67	0.17	0.52	0.86	1.05	-0.115	-0.4375	-0.4	0.497717	0.027138	0.120955	1	0.996511	0.721448
Cntn3	Q07409	0.35	0.8	0.89	0.86	0.87	0.5	0.93	0.95	0.43	0.7	1.1	0.9	0.42	0.52	1.11	0.96	0.0875	0.0575	0.0275	0.660975	0.798837	0.91077	1	0.996511	0.986458
Cntn4	Q69Z26	0.3	0.26	0.43	0.65	0.53	0.68	0.56	0.56	0.6	0.44	0.57	0.73	0.45	0.81	0.33	0.32	0.1725	0.175	0.0675	0.292755	0.335096	0.743796	1	0.996511	0.959321
Cntn5	P68500	0.68	0.59	0.79	1.07	0.15	0.84	0.97	1.41	1.46	0.72	1.26	0.94	1.79	0.5	1.24	0.99	0.06	0.3125	0.3475	0.832261	0.194103	0.266285	1	0.996511	0.818107
Cntn6	Q9JMB8	0.74	0.82	0.56	0.7	0.51	0.73	0.66	0.44	0.96	0.97	0.73	1.16	0.18	1.06	0.1	0.47	-0.12	0.25	-0.2525	0.446192	0.178051	0.33659	1	0.996511	0.847578
Cntnap1	O54991	0.41	0.44	0.22	0.01	0.29	0.33	0.81	-0.25	0.02	-0.5	0	0.36	-0.02	0.13	0.2	0.33	0.025	-0.3	-0.11	0.920405	0.220831	0.576298	1	0.996511	0.927
Cntnap2	E9QNF7	1.25	0.88	0.63	0.71	1.2	1.36	0.69	0.61	0.79	0.54	0.56	1.01	0.82	0.91	0.93	0.6	0.0975	-0.1425	-0.0525	0.691724	0.514991	0.805545	1	0.996511	0.971715
Cntnap3	E9PY62	-0.12	-0.19	2.51	1.26	-0.15	0.11	3.35	2.79	1.69	0.59	2.85	0.31	1.9	0.43	2.76	3.23	0.66	0.495	1.215	0.511592	0.53169	0.155284	1	0.996511	0.750763
Cntnap4	D3YWB9	0.36	0.68	0.32	0.38	0.58	0.5	0.54	0.35	0.6	0.31	0.53	0.48	0.37	0.85	0.11	0.31	0.0575	0.045	-0.025	0.719491	0.797247	0.911464	1	0.996511	0.986458
Cntnap5a	Q0V8T9	0.79	0.73	-0.09	0.08	0.77	0.82	-0.07	0.08	0.4	-0.34	0.23	1.14	0.28	0.67	0.01	0.03	0.0225	-0.02	-0.13	0.943028	0.956519	0.654231	1	0.996755	0.947657
Cntnap5b	Q0V8T8	1.36	1.4	0.79	0.67	1.87	1.31	1.2	0.79	1.45	1.51	1.02	1.57	0.82	1.86	0.96	1.03	0.2375	0.3325	0.1125	0.425258	0.206538	0.718448	1	0.996511	0.958398
Cntnap5c	Q0V8T7	0.72	0.69	2.34	1.31	0.62	0.91	0.41	1.39	-0.07	0.76	0.67	0.87	0.48	-0.8	2.73	1.03	-0.4325	-0.7075	-0.405	0.31133	0.118573	0.591125	1	0.996511	0.929523
Coa3	Q9D2R6	0.59	0.74	0.76	1.54	0.53	0.89	0.8	1.52	0.76	0.7	0.97	0.59	0.43	1.43	0.37	0.45	0.0275	-0.1525	-0.2375	0.926375	0.548262	0.483833	1	0.996511	0.894091
COA4	Q8BT51	-0.95	-2.67	0.26	1.19	-2	-0.97	0.85	0.82	-2.37	1.14	0.64	-1.03	-2.34	-2.79	0.31	0.21	0.2175	0.1375	-0.61	0.824117	0.894641	0.563283	1	0.996511	0.920024
Coa6	Q8BGD8	-1.4	-2.47	-1.67	-1.18	-2.26	-0.94	-1.75	-1.65	-4.46	-0.81	-1.52	-1.64	-2.11	-4.57	-1.77	-1.48	0.03	-0.4275	-0.8025	0.935784	0.58319	0.264435	1	0.996511	0.816417
Coa7	Q921H9	-0.04	-0.17	0.28	-0.02	-0.47	0.42	-0.46	-0.03	-0.44	0.5	0.26	-0.08	-0.24	-0.76	0.09	0.27	-0.1475	0.0475	-0.1725	0.552212	0.848935	0.527698	1	0.996511	0.908538
Coa8	E9Q6C3	0.92	1.61	0.7	0.57	2.03	1.19	1.82	1	1.69	1.46	0.58	1.93	0.24	1.92	0.72	0.77	0.56	0.465	-0.0375	0.116388	0.223342	0.926749	1	0.996511	0.989128
Coasy	Q9DBL7	-0.06	0.03	1.55	1.59	0.02	-0.08	1.03	1.9	-1.11	0.54	1.69	-0.01	-1.02	-2.2	1.36	1.54	-0.06	-0.5	-0.8575	0.91985	0.465975	0.362889	1	0.996511	0.858475
Cobl	G5E8P4	0.19	-0.11	0.11	0.02	0.38	0.02	-0.47	-0.18	0.29	0.82	0.26	0.01	0.67	0.8	-0.1	-0.42	-0.115	0.2925	0.185	0.596261	0.205717	0.556856	1	0.996511	0.917092
Cobll1	B1AZ15	-0.88	-1.81	-1.99	-2.41	-1.95	-1.37	-2.44	-2.56	-0.22	-0.76	-1.61	-0.89	-0.36	-0.84	-1.33	-2.34	-0.3075	0.9025	0.555	0.44763	0.0526654	0.281441	1	0.996511	0.822084
Coch	Q62507	0.95	-0.46	0.26	-0.01	0.81	0.73	0.63	-0.21	-0.99	0.4	-0.08	0.91	-0.63	-0.35	0.21	0.45	0.305	-0.125	-0.265	0.40885	0.789866	0.487734	1	0.996511	0.897297
Cog1	Q9Z160	-1.89	-1.86	-0.95	-1.36	-1.53	-2.13	-1.36	-1.54	-1.21	-1.07	-1.54	-1.71	-1.23	-1.41	-1.41	-1.12	-0.125	0.1325	0.2225	0.659963	0.638324	0.407266	1	0.996511	0.874084
Cog2	Q921L5	-2.77	-2.24	-0.96	-2.18	-1.15	-2.73	-1.86	-2.42	-2.9	-1.59	-2.16	-2.37	-2.54	-2.01	-1.08	-1.83	-0.0025	-0.2175	0.1725	0.995826	0.625038	0.708301	1	0.996511	0.957562
Cog3	E9QL65	-1.76	-1.86	-1.3	-1.03	-1.44	-2.01	-1.21	-1.37	-1.77	-0.61	-1.34	-1.77	-2.01	-1.12	-1.7	-1.17	-0.02	0.115	-0.0125	0.940476	0.730655	0.967001	1	0.996511	0.9927
Cog4	G3UWH9	-1.52	-1.46	-2.14	-1.67	-1.15	-1.72	-1.71	-2.4	-1.49	-1.66	-1.89	-1.02	-1.55	-1.3	-2.36	-1.76	-0.0475	0.1825	-0.045	0.872891	0.488333	0.876769	1	0.996511	0.979626
Cog5	Q8C0L8	-1.17	-1.45	-1.36	-1.42	-1.18	-1.23	-1.24	-1.74	-1.36	-1.13	-1.71	-1.38	-0.66	-0.67	-1.73	-1.15	0.0025	-0.045	0.2975	0.989295	0.813972	0.305453	1	0.996511	0.832258
Cog6	A0A0R4J0L5	-1.6	-1.54	-1.22	-1.55	-1.19	-1.43	-0.38	-1.48	-0.99	-0.71	-1.17	-1.25	-0.07	-0.65	-1.39	-0.9	0.3575	0.4475	0.725	0.214088	0.0477537	0.0368265	1	0.996511	0.658454
Cog7	A0A0R4J0Q9	-0.37	-0.71	-1.4	-1.53	-0.47	-0.45	-0.98	-1.84	0	-1.25	-1.43	-0.1	-0.27	-0.22	-1.77	-1.18	0.0675	0.3075	0.1425	0.86692	0.490585	0.747691	1	0.996511	0.960744
Cog8	Q9JJA2	-2.76	-2.85	-1.72	-1.89	-1.31	-2.53	-1.16	-1.66	-0.75	-1.53	-1.58	-2.27	0.39	-0.99	-1.88	-1.47	0.64	0.7725	1.3175	0.135941	0.0847726	0.0329921	1	0.996511	0.644622
Coil	Q5SU73	1.63	1.52	1.69	1.84	0.66	1.02	1.04	1.88	1.29	1.18	1.48	1.18	1.38	1.2	1.61	1.57	-0.52	-0.3875	-0.23	0.0835562	0.0481837	0.249196	1	0.996511	0.804842
Col12a1	E9PX70	-0.83	-1.22	-1.59	-1.5	-0.82	-1.55	-2.33	-2.26	-0.89	-1.03	-1.45	-0.65	-1.4	-0.93	-2.17	-1.7	-0.455	0.28	-0.265	0.243932	0.296529	0.414798	1	0.996511	0.874945
Col18a1	E9QPX1	-2.96	-2.98	-3.56	-3.51	-2.66	-3.07	-3.69	-4.09	-2.74	-2.77	-3.15	-2.36	-2.52	-3.31	-3.42	-3.69	-0.125	0.4975	0.0175	0.717821	0.0753342	0.954884	1	0.996511	0.992482
Col19a1	F8WHV4	-1.28	-0.74	-0.58	-1.01	-1.48	-1.01	-0.77	-1.56	-1.08	-0.71	-0.48	-1.18	-2.38	0.31	-1.79	-1.3	-0.3025	0.04	-0.3875	0.254068	0.871874	0.488442	1	0.996511	0.897531
Col1a1	P11087	-6.49	-7.24	-7.02	-7.74	-6.5	-6.67	-7.49	-7.38	-6.21	-7.08	-6.24	-6.15	-4.45	-6.53	-7.84	-7.4	0.1125	0.7025	0.5675	0.745704	0.0628683	0.439471	1	0.996511	0.883205
Col1a2	Q01149	-1.07	-1.66	-1.09	-1.69	-2.11	-0.55	-2.75	-1.69	-2.62	-4.16	-1.01	-0.99	-1.74	-4.49	-1.13	-1.15	-0.3975	-0.8175	-0.75	0.396873	0.265986	0.325523	1	0.996511	0.843085
Col25a1	V9GWX5	-3.12	-2.99	-1.83	-1.83	-3.81	-2.36	-2.27	-1.66	1.3	-1.19	-1.68	-3.03	2.09	-2.33	-0.22	-2.1	-0.0825	1.2925	1.8025	0.876358	0.16569	0.0908924	1	0.996511	0.693316
Col3a1	P08121	-3.09	-4.62	-9.1	-18.01	-4.86	-2.44	-14.92	-11.91	0.23	-7.78	-10.95	-3.49	1.21	-5.32	-10.95	-12.35	0.1725	3.2075	1.8525	0.965221	0.395537	0.647377	1	0.996511	0.945544
Col4a1	P02463	-0.55	-0.95	-0.47	-0.75	-0.8	-0.67	-0.62	-0.45	-0.89	0.28	-0.4	-0.77	-0.22	-0.96	-0.57	-0.62	0.045	0.235	0.0875	0.799488	0.430576	0.704852	1	0.996511	0.957084
Col4a2	P08122	-1.29	-1.39	-1.67	-2.05	-1.19	-0.83	-1.47	-1.94	-1	-1.37	-1.52	-1.11	-0.66	-1.45	-1.1	-1.2	0.2425	0.35	0.4975	0.412558	0.16459	0.0867184	1	0.996511	0.691619
Col4a5	Q63ZW6	2.17	2.13	0.02	-1.93	1.52	2.21	1.34	1.72	1.15	-0.85	2.62	2.29	0.88	1.27	1.99	2.98	1.1	0.705	1.1825	0.241126	0.535625	0.243125	1	0.996511	0.798789
Col6a1	Q04857	-3.3	-3.03	-3.21	-3.67	-2.83	-3.41	-3.5	-3.97	-3.44	-2.26	-3.28	-3.25	-3.24	-3.28	-3.36	-3.45	-0.125	0.245	-0.03	0.650667	0.431102	0.883603	1	0.996511	0.979767
Col6a2	Q02788	-2.7	-2.99	-3.73	-3.53	-2.47	-2.78	-3.25	-4.16	-2.51	-3.05	-2.97	-2.5	-2.31	-2.71	-3.49	-3.75	0.0725	0.48	0.1725	0.860296	0.123807	0.665165	1	0.996511	0.949825
Col6a3	J3QQ16	-2.95	-3.48	-3.4	-3.19	-2.97	-3.33	-3.07	-3.36	-3.37	-3.13	-2.78	-2.7	-3.14	-2.66	-3.34	-2.99	0.0725	0.26	0.2225	0.705073	0.27388	0.347433	1	0.996511	0.851503
Colec12	A0A452J8C7	-0.21	-0.25	0.28	-0.22	-0.3	0.17	0.28	-0.49	-0.39	-0.1	-0.78	-0.04	-0.29	-0.18	-0.41	0.34	0.015	-0.2275	-0.035	0.950055	0.354633	0.886218	1	0.996511	0.979767
Colgalt1	Q8K297	-0.75	-0.67	-0.02	-0.32	0.01	-1.05	0.71	-0.21	-0.32	-0.24	-0.03	-0.75	0.95	0.12	0.45	0.86	0.305	0.105	1.035	0.430584	0.675479	0.0045682	1	0.996511	0.550241
Commd1	Q8VI86	-0.89	0.18	1.42	1.88	-0.49	-1.21	1.04	1.89	-1.05	1.84	1.57	-0.7	-0.17	-0.35	1.66	1.33	-0.34	-0.2325	-0.03	0.690108	0.791982	0.967269	1	0.996511	0.9927
Commd10	Q8JZY2	-0.8	-0.11	-0.8	-0.95	-0.11	-0.8	-0.8	-1.07	-0.67	-0.3	-0.65	-0.4	-1.17	0.17	-1.11	-0.97	-0.03	0.16	-0.105	0.914957	0.507017	0.77232	1	0.996511	0.965933
Commd2	Q8BXC6	-1.34	-1.22	-1.6	-1.65	-0.5	-1.77	-0.98	-1.57	-1.27	-1.83	-1.7	-1.34	-1.51	-0.09	-1.81	-1.49	0.2475	-0.0825	0.2275	0.423813	0.698753	0.560561	1	0.996511	0.919045
Commd3	Q63829	-0.48	-0.3	-0.01	-0.14	-0.2	-0.55	-0.14	-0.02	-0.36	0.39	-0.08	-0.18	-0.51	0.26	-0.44	0.03	0.005	0.175	0.0675	0.979068	0.443846	0.784795	1	0.996511	0.967642
Commd4	Q9CQ02	-2.63	-2.27	-1.73	-3.52	-1.94	-1.83	-2.22	-3.26	-2.5	-3.23	-2.41	-2.75	-2.61	-1.93	-3.42	-2.71	0.225	-0.185	-0.13	0.62876	0.645772	0.776211	1	0.996511	0.966842
Commd5	A0A0R4J0U7	-0.61	-0.46	-0.64	-0.81	-0.13	-0.61	-0.52	-0.64	-0.81	-1.06	-0.79	-0.57	-0.72	-0.5	-0.91	-0.92	0.155	-0.1775	-0.1325	0.404094	0.350117	0.501587	1	0.996511	0.901002
Commd6	Q3V4B5	-0.45	-0.23	-0.26	0.01	-0.1	-0.46	-0.21	-0.08	-0.15	-0.09	-0.29	-0.27	-0.6	0.45	-0.66	0.01	0.02	0.0325	0.0325	0.909651	0.853689	0.912323	1	0.996511	0.986458
Commd7	Q8BG94	-0.3	-0.27	-0.28	-0.04	0.27	-0.35	-0.73	-0.3	-0.07	0.57	-0.53	-0.62	-0.09	1	-0.55	-0.75	-0.055	0.06	0.125	0.813717	0.835281	0.745695	1	0.996511	0.96006
Commd8	Q9CZG3	-1.13	-0.58	-0.46	-0.12	-0.14	-1.19	-0.23	-0.21	-0.89	-0.23	-0.05	-0.97	-0.82	-0.1	-0.49	-0.41	0.13	0.0375	0.1175	0.685135	0.904972	0.673966	1	0.996744	0.952944
Commd9	Q8K2Q0	0.46	0.05	-0.53	-0.52	0.09	-0.17	-0.41	-0.33	-2.13	-2.25	-0.37	0.75	-1.98	-2.56	-0.57	-0.48	-0.07	-0.865	-1.2625	0.795727	0.233797	0.0384236	1	0.996511	0.658454
Comt	O88587	-1.42	-1.29	-0.36	-0.33	-0.66	-1.47	0.71	0.14	-2.04	-2.32	-0.08	-1.46	-1.73	-1.03	0.05	-0.07	0.53	-0.625	0.155	0.317752	0.261294	0.747595	1	0.996511	0.960744
Comtd1	Q8BIG7	-0.48	-0.59	-0.21	-0.04	-0.6	-0.4	-0.73	-0.16	0.64	0.09	-0.05	-0.4	0.6	-0.18	-0.07	-0.38	-0.1425	0.4	0.3225	0.495857	0.159437	0.253172	1	0.996511	0.809524
Copa	F8WHL2	-1.66	-2.16	-2.11	-2.4	-1.7	-1.8	-1.86	-2.55	-1.68	-0.96	-2.18	-1.28	-1.36	-1.56	-2.05	-2.02	0.105	0.5575	0.335	0.684547	0.0986757	0.218616	1	0.996511	0.787447
Copb1	Q9JIF7	-0.98	-0.81	-1.25	-1.32	-0.76	-0.81	-1.23	-1.38	-0.56	-1	-1.1	-0.5	-0.32	-0.25	-1.21	-1.1	0.045	0.3	0.37	0.836741	0.20834	0.229501	1	0.996511	0.787447
Copb2	O55029	-2.38	-2.42	-1.48	-2.26	-1.89	-2.37	-1.14	-2.05	-2.61	-1.81	-1.6	-1.95	-1.96	-2.18	-1.44	-1.14	0.2725	0.1425	0.455	0.420819	0.650424	0.189574	1	0.996511	0.776843
Cope	O89079	-2.71	-3.02	-1.82	-2.27	-2.04	-2.95	-0.98	-1.92	-3.13	-1.41	-1.89	-2.32	-3.14	-2.05	-2.14	-1.49	0.4825	0.2675	0.25	0.297565	0.53426	0.54967	1	0.996511	0.913178
Copg1	Q9QZE5	-1.8	-2.04	-2.56	-2.71	-1.7	-1.89	-2.62	-3.06	-1.9	-2.04	-2.65	-1.56	-1.8	-1.37	-2.72	-2.87	-0.04	0.24	0.0875	0.912788	0.453177	0.828731	1	0.996511	0.973757
Copg2	Q9QXK3-4	-0.05	-0.85	-0.76	-1.16	-0.3	-0.27	-0.64	-0.76	-1.25	-0.79	-0.79	-0.05	-0.97	-1.22	-0.87	-0.6	0.2125	-0.015	-0.21	0.440182	0.964506	0.469215	1	0.996755	0.890107
Coprs	Q9CQ13	-1.06	-1	-0.14	0.86	-0.82	-0.65	0.26	0.82	-0.72	1.44	0.68	-0.96	-1	-1.22	0.52	1.28	0.2375	0.445	0.23	0.664303	0.508093	0.736988	1	0.996511	0.958635
Cops2	P61202-2	0.99	0.82	1.19	0.9	0.93	1.09	1.41	1.53	-0.48	0.39	1.17	0.98	-0.87	-0.17	0.7	0.97	0.265	-0.46	-0.8175	0.198773	0.232451	0.0729136	1	0.996511	0.668066
Cops3	O88543	-0.54	-0.71	-0.31	-0.43	-0.78	-0.44	-0.53	-0.22	-0.72	-0.18	-0.46	-0.55	-0.74	-0.95	-0.68	-0.31	0.005	0.02	-0.1725	0.978448	0.918122	0.428168	1	0.996755	0.879165
Cops4	O88544	-0.04	-0.06	-0.15	-0.01	-0.1	-0.17	-0.25	0.03	-0.48	-0.02	-0.09	-0.05	-0.78	-0.29	-0.31	-0.36	-0.0575	-0.095	-0.37	0.696879	0.598618	0.0827377	1	0.996511	0.68865
Cops5	O35864	-0.52	-0.3	-0.94	-0.6	-0.34	-0.4	-0.52	-0.62	-0.37	-1.53	-0.63	-0.52	-0.65	-0.76	-1.24	-1.05	0.12	-0.1725	-0.335	0.52634	0.568004	0.174018	1	0.996511	0.765074
Cops6	O88545	-0.77	-0.7	-0.47	-0.03	-0.85	-0.6	-0.11	-0.03	-1.07	-0.74	-0.45	-0.73	-1.38	-0.87	-0.88	-0.59	0.095	-0.255	-0.4375	0.720919	0.300385	0.12234	1	0.996511	0.721448
Cops7a	Q9CZ04-2	0.47	0.6	0.32	0.29	0.26	-0.01	-0.31	0.22	0.21	0.91	0.04	0.2	-0.12	0.23	-0.03	-0.43	-0.38	-0.08	-0.5075	0.070668	0.735396	0.0373266	1	0.996511	0.658454
Cops7b	Q8BV13	0.05	-0.27	-0.05	-0.21	-0.59	0	-0.44	0	0.3	0.29	-0.07	0.31	0.12	-0.59	-0.37	-0.58	-0.1375	0.3275	-0.235	0.499858	0.099892	0.317083	1	0.996511	0.838864
Cops8	Q8VBV7	-0.48	-0.07	-0.7	-0.2	-0.33	-0.28	-0.27	-0.48	-0.15	-0.25	-0.31	-0.32	-0.65	0.54	-1.04	-1.2	0.0225	0.105	-0.225	0.905077	0.598332	0.579362	1	0.996511	0.927734
Cops9	Q3U898	-2.02	-0.54	-0.08	-2.95	-1.21	-0.89	-0.61	-1.19	-3.44	0.39	-3.19	-1.2	-4.89	-2.3	-1.07	-1.74	0.4225	-0.4625	-1.1025	0.499511	0.647397	0.266823	1	0.996511	0.818521
Copz1	P61924	-0.72	-1	-0.21	-0.84	-0.28	-0.91	-0.27	-0.48	-3.4	-1.85	-0.19	-0.17	-3.33	-3.38	-0.39	-0.31	0.2075	-0.71	-1.16	0.401466	0.337563	0.170618	1	0.996511	0.762322
Copz2	Q9JHH9	-1.84	-1.33	-1.87	-2.23	-1.74	-2.79	-2.17	-2.66	-1.69	-1.11	-2.36	-1.98	-1.76	-1.17	-2.77	-2.16	-0.5225	0.0325	-0.1475	0.110343	0.919515	0.695348	1	0.996755	0.955729
Coq10a	A0A1W2P7G5	-0.14	0.2	-0.04	0.05	0.26	-0.19	0.32	0.01	0.23	0.53	0.14	-0.32	0.59	0.55	0.03	-0.05	0.0825	0.1275	0.2625	0.651928	0.574315	0.26919	1	0.996511	0.820534
Coq2	F7CDY3	0.44	2.05	-0.59	-0.18	1.52	1.04	0.99	-0.34	1.17	0.22	0.15	1.73	1.03	1.87	-0.04	0.79	0.3725	0.3875	0.4825	0.564389	0.546022	0.457758	1	0.996511	0.887902
Coq3	Q8BMS4	1.51	1.36	-0.04	0.47	0.5	1.11	0.63	0.07	0.69	-0.91	-0.12	0.4	0.82	0.55	-0.11	-0.61	-0.2475	-0.81	-0.6625	0.54225	0.116311	0.175954	1	0.996511	0.771503
Coq4	Q8BGB8	-0.86	-0.14	-0.86	-0.19	-0.67	-0.47	-0.17	-0.72	-0.2	-0.2	-0.59	-0.48	-0.14	0.54	-0.76	-0.55	0.005	0.145	0.285	0.983959	0.562784	0.421939	1	0.996511	0.875736
Coq5	Q9CXI0	0.32	0.76	-0.1	0.06	0.42	0.01	0.14	-0.07	0.27	-0.47	-0.01	0.15	0.22	0.56	-0.49	0.05	-0.135	-0.275	-0.175	0.567938	0.315446	0.564925	1	0.996511	0.920315
Coq6	Q8R1S0	0.12	0.24	0.93	0.98	-0.76	-0.21	-0.03	0.28	-0.84	-0.14	0.15	-0.48	-0.78	-1.37	0.18	-0.02	-0.7475	-0.895	-1.065	0.0367993	0.0180358	0.0261217	1	0.996511	0.633075
Coq7	P97478	0.75	-1.13	-0.42	-0.2	-1.23	0.21	-0.79	-0.97	-1.18	-0.15	-0.73	-0.89	-2.46	-1.2	-1.79	-0.57	-0.445	-0.4875	-1.255	0.350593	0.266312	0.0368116	1	0.996511	0.658454
Coq8a	Q60936	-0.02	0.4	0.49	0.69	0.28	-0.34	1.11	0.88	-0.3	0.07	0.72	-0.12	-0.41	-0.25	0.47	0.78	0.0925	-0.2975	-0.2425	0.788875	0.304287	0.464362	1	0.996511	0.888267
Coq8b	Q566J8	-0.04	0.17	-0.6	-0.05	-0.34	0.54	0.33	-0.09	0.35	0.91	0.22	0.26	0.63	0.15	0.38	0.56	0.24	0.565	0.56	0.377703	0.0489843	0.0397994	1	0.996511	0.658454
Coq9	Q8K1Z0	0.69	0.83	0.7	0.81	0.42	0.64	0.48	0.58	0.31	0.03	0.71	0.24	0.31	0.56	0.64	0.64	-0.2275	-0.435	-0.22	0.143865	0.0522887	0.239442	1	0.996511	0.794419
Coro1a	O89053	0.53	-0.29	0.22	0.41	-0.36	0.47	-0.11	0.6	-0.3	0.09	0.21	-0.06	-0.54	-0.12	-0.17	-0.32	-0.0675	-0.2325	-0.505	0.817301	0.344906	0.0622687	1	0.996511	0.66433
Coro1a	A0A0U1RPY8	-2.8	-3.6	-2.21	-1.74	-1.6	-3.33	-2.48	-2.95	-1.7	-2.49	-1.85	-2.16	-4.14	-1.47	-4.29	-2.41	-0.0025	0.5375	-0.49	0.996045	0.218511	0.501286	1	0.996511	0.901002
Coro1b	Q9WUM3	0.25	-0.58	0.39	0.84	-0.03	0.09	0.25	0.81	0.07	1.38	0.34	0.02	-0.26	0.46	0.16	0.05	0.055	0.2275	-0.1225	0.870831	0.584899	0.71451	1	0.996511	0.958106
Coro1c	Q9WUM4	0.74	0	0.36	0.47	0.33	0.45	0.53	0.8	0.08	0.28	0.26	0.31	-0.65	0.13	-0.18	-0.25	0.135	-0.16	-0.63	0.526424	0.447164	0.0327232	1	0.996511	0.644622
Coro2a	B1AVH5	-0.17	-0.22	0.55	0.38	0.36	-0.05	0.15	0.08	-0.12	0.09	0.5	-0.28	-0.01	0.72	0.18	-0.24	-7.85046e-17	-0.0875	0.0275	1	0.748235	0.926009	1	0.996511	0.988944
Coro2b	Q8BH44	0.95	0.51	1.26	1.13	0.23	1.01	0.99	1.06	0.69	0.84	0.95	0.37	0.4	0.6	0.11	0.73	-0.14	-0.25	-0.5025	0.599346	0.305296	0.0681916	1	0.996511	0.664936
Coro6	Q920M5	0.38	0.47	1.85	1.08	0.62	0.46	0.75	1.44	0.88	-0.29	1.39	0.09	1.14	0.72	1.58	2.22	-0.1275	-0.4275	0.47	0.738927	0.380413	0.30409	1	0.996511	0.831662
Coro7	Q9D2V7	0.14	-0.77	-0.68	-0.09	-0.47	-0.38	-0.33	-0.17	-0.53	-0.47	-0.53	-0.62	-0.81	-0.11	-0.95	-1.06	0.0125	-0.1875	-0.3825	0.959252	0.457879	0.246077	1	0.996511	0.802442
Cotl1	Q9CQI6	0.54	-0.66	0.28	0.36	-0.6	0.24	-0.37	0.48	0.27	1.06	-0.1	0.13	-0.13	-0.28	-0.21	-0.74	-0.1925	0.21	-0.47	0.590111	0.56249	0.156436	1	0.996511	0.751493
Cox10	Q8CFY5	0.04	0.63	-0.97	-0.49	0.74	-0.43	-0.8	0.49	1.06	-1.99	-0.19	0.6	1.19	1.18	-1.13	-0.65	0.1975	0.0675	0.345	0.67358	0.921635	0.590982	1	0.996755	0.929458
Cox11	Q6P8I6	0.21	0.3	-0.47	-1.12	0.23	0.2	-0.5	-0.34	0.1	0.81	0.43	-0.11	0.29	0.5	-0.12	0.39	0.1675	0.5775	0.535	0.64668	0.149742	0.156833	1	0.996511	0.751493
Cox14	Q8BH51	-0.7	0.23	1.15	1.43	-0.5	0.5	1.26	1.25	2.19	1.83	1.47	-0.83	4.47	-1.32	1.43	1.19	0.1	0.6375	0.915	0.863567	0.409253	0.431451	1	0.996511	0.879165
Cox15	Q8BJ03-2	-0.68	-0.35	-0.65	-0.37	0.39	-0.48	0.23	-0.51	-0.25	-1.09	-0.08	-0.39	0	0.83	-0.55	-0.15	0.42	0.06	0.545	0.133035	0.816624	0.108216	1	0.996511	0.706427
Cox17	P56394	-0.3	-0.96	-0.3	-0.26	-0.8	-0.81	-0.76	-0.57	-1.2	0.96	-0.56	-1.27	0.16	-0.25	-0.26	-0.78	-0.28	-0.0625	0.1725	0.199676	0.901608	0.538614	1	0.996609	0.912212
Cox18	Q8VC74	0.03	-0.93	-0.8	0.07	-2.88	0.56	-1.08	-1.09	1.85	-0.79	-0.48	-0.21	3.37	-1.76	-1.18	-0.07	-0.715	0.5	0.4975	0.309601	0.414057	0.638533	1	0.996511	0.942804
Cox19	Q8K0C8	-1.03	-0.65	-2.26	-1.26	-0.21	-0.98	-1.69	-1.51	-0.78	-0.22	-0.99	-1.17	-0.49	0.34	-1.39	-1.61	0.2025	0.51	0.5125	0.651155	0.20873	0.341015	1	0.996511	0.848473
Cox20	Q9D7J4	-1.47	-1.67	-1.89	-1.4	-1.61	-1.23	-1.64	-1.38	-1.01	-0.56	-1.8	-1.54	0.34	-0.69	-1.5	-1.43	0.1425	0.38	0.7875	0.454702	0.23078	0.089341	1	0.996511	0.69217
Cox4i1	P19783	0.31	0.19	0.33	0.96	0.08	0.32	0.78	0.96	0.26	0.05	0.79	0.22	0.05	0.38	0.1	0.14	0.0875	-0.1175	-0.28	0.748403	0.648943	0.247005	1	0.996511	0.803237
Cox4i1	M0QWX7	2.05	3.64	-0.79	-1.21	2.91	2.9	-2.85	-3.11	2.63	-2.26	-1.62	1.92	3.77	1.03	-1.97	-2.1	-0.96	-0.755	-0.74	0.603538	0.6197	0.647859	1	0.996511	0.945793
Cox4i2	Q91W29	-0.95	-0.78	2.12	2.88	-0.7	-0.79	1.53	2.03	0.28	2.87	2.38	-1.45	2.84	0.31	2.62	2.3	-0.3	0.2025	1.2	0.785541	0.871627	0.259061	1	0.996511	0.812074
Cox5a	P12787	0.98	1.16	0.98	0.8	1.06	0.84	1.13	1.14	0.15	0	0.97	0.8	-0.15	0.12	0.54	0.95	0.0625	-0.5	-0.615	0.700464	0.0879735	0.0487683	1	0.996511	0.658454
Cox5b-ps	Q9D881	1.46	1.03	1.24	1.88	0.57	1.25	1.02	1.89	1.51	1.94	1.29	1.42	1.32	1.26	1.09	1.02	-0.22	0.1375	-0.23	0.500198	0.588828	0.343228	1	0.996511	0.848473
Cox6a1	Q9DCW5	-1.12	-1.24	-0.4	0.23	-1.37	-1.27	0.91	0.15	-1.39	-1.37	0.15	-1.36	-3.89	-0.39	-0.39	-0.31	0.2375	-0.36	-0.6125	0.691422	0.459188	0.478055	1	0.996511	0.892279
Cox6a2	P43023	-1.06	-1.14	-0.11	0.44	-1.56	-1.24	-0.08	0.14	-0.57	-0.62	0.38	-1.09	-0.35	-2.08	0.11	0.67	-0.2175	-0.0075	0.055	0.678604	0.986995	0.931862	1	0.999285	0.989713
Cox6b1	P56391	1.4	0.53	0.49	0.59	0.76	1.37	0.14	0.33	-0.25	0.27	0.35	1.03	0.3	-0.12	0.16	0.16	-0.1025	-0.4025	-0.6275	0.761623	0.251834	0.0377981	1	0.996511	0.658454
Cox6c	Q9CPQ1	2.74	1.52	2.12	2.16	1.22	1.88	1.76	2.8	1.43	-0.26	2.23	2.41	0.7	0.6	1.53	1.99	-0.22	-0.6825	-0.93	0.575947	0.276016	0.0432238	1	0.996511	0.658454
Cox7a1	A0A140LIU4	0.56	1.1	0.8	1.51	1.71	1.12	1.57	1.18	0.14	0.33	1.46	0.85	0.77	-0.14	1.23	1.48	0.4025	-0.2975	-0.1575	0.147789	0.40822	0.692805	1	0.996511	0.955729
Cox7a2	P48771	2.03	2.17	1.71	1.75	1.52	2.25	2.06	1.63	1.1	0.32	1.69	1.47	1.74	0.13	1.37	1.84	-0.05	-0.77	-0.645	0.825409	0.0377899	0.129417	1	0.996511	0.723655
Cox7a2l	E9PZS8	0.62	1.09	0.96	1.02	0.71	1.12	0.67	0.61	0.21	0.32	0.92	0.72	0.54	-0.7	0.63	0.72	-0.145	-0.38	-0.625	0.459768	0.124749	0.100296	1	0.996511	0.698156
Cox7c	P17665	5.64	2.64	2.63	1.28	1.82	7.11	2.24	2.38	2.36	0.97	2.57	4.85	0.98	1.02	3.01	4.08	0.34	-0.36	-0.775	0.806199	0.743207	0.47573	1	0.996511	0.892174
Cp	G3X9T8	-1.1	-1.35	-0.94	-0.68	-1.05	-1.55	-0.74	-1.08	-1.65	-0.9	-0.84	-0.94	-1.38	-1.67	-1.27	-1.17	-0.0875	-0.065	-0.355	0.71129	0.800566	0.141062	1	0.996511	0.737973
Cpd	O89001	-0.94	-1.64	-1.34	-1.31	-1.17	-1.14	-1.68	-1.39	-1.65	-1.24	-1.49	-1.6	-0.96	-1.2	-1.41	-1.7	-0.0375	-0.1875	-0.01	0.861877	0.387232	0.967757	1	0.996511	0.9927
Cpe	Q00493	1.13	1.25	-0.17	-0.23	1.47	0.96	-0.1	0	0.38	0.59	0.04	1.45	0.07	0.52	0.42	0.13	0.0875	0.12	-0.21	0.863722	0.798629	0.603739	1	0.996511	0.931517
Cpeb2	E9Q969	0.27	-1.2	-0.73	-0.49	-0.75	0.12	-0.54	-0.57	-0.47	-0.72	-0.61	0.37	0.09	0.05	-0.84	-0.96	0.1025	0.18	0.1225	0.768605	0.638051	0.760489	1	0.996511	0.963123
Cpeb3	A0A0R4J102	-0.94	-0.63	-1.3	-1.17	-0.66	-0.85	-0.9	-1.21	-1.03	-1.2	-1.18	-0.57	-0.73	-0.17	-1.07	-1.25	0.105	0.015	0.205	0.623942	0.94941	0.492283	1	0.996755	0.897531
Cpeb4	Q5SU48	-0.8	-0.94	-0.78	-0.65	-1.13	-1.18	-0.28	-0.63	-0.89	-1.22	-0.72	-0.84	-0.27	0.88	-0.07	-0.99	-0.0125	-0.125	0.68	0.9582	0.503536	0.100846	1	0.996511	0.698156
Cplx1	P63040	0.14	0.44	0.9	0.62	0.6	-0.12	0.24	0.52	0.09	0.68	0.59	0.09	0.41	0.98	0.52	0.63	-0.215	-0.1625	0.11	0.386523	0.518539	0.649015	1	0.996511	0.946117
Cplx2	P84086	1.23	1.1	0.28	0.69	0.86	0.88	0.08	0.33	0.89	0.9	0.02	1.12	0.69	1.14	0.3	0.09	-0.2875	-0.0925	-0.27	0.339462	0.775642	0.41099	1	0.996511	0.874811
Cplx3	Q8R1B5	0.03	0.81	1.01	0.72	0.87	0.6	-0.18	0.61	0.65	1.49	1.11	0.35	0.78	0.72	-0.05	0.21	-0.1675	0.2575	-0.2275	0.588744	0.440431	0.462094	1	0.996511	0.888262
Cpm	Q80V42	1.08	1.03	1.39	0.59	1.28	0.72	0.84	0.98	0.48	0.73	1.17	0.88	0.24	0.89	1.84	1.67	-0.0675	-0.2075	0.1375	0.765015	0.406102	0.726463	1	0.996511	0.958398
Cpne1	Q8C166	0.09	0.02	-0.3	0.06	0.17	0.34	-0.1	-0.14	1.05	-1.22	-0.21	0.12	0.97	0	-0.44	-0.28	0.1	-0.0325	0.095	0.594489	0.942218	0.774744	1	0.996755	0.966468
Cpne2	P59108	0.74	1.18	0	0.07	1.04	0.98	0.81	-0.16	0.97	-1.04	-0.05	1.08	0.77	1.28	-0.39	0.55	0.17	-0.2575	0.055	0.654431	0.628414	0.89764	1	0.996511	0.983509
Cpne3	Q8BT60	0.77	0.7	0.63	0.56	0.84	0.98	0.82	0.67	-0.18	0.01	0.71	0.85	-0.39	-0.69	0.93	0.73	0.1625	-0.3175	-0.52	0.299344	0.2635	0.207178	1	0.996511	0.785338
Cpne4	Q8BLR2	0.58	0.29	0.58	0.61	0.64	0.81	1.4	0.88	0.3	0.22	0.72	0.6	0.07	0.28	0.76	0.89	0.4175	-0.055	-0.015	0.0723078	0.777694	0.951085	1	0.996511	0.992476
Cpne5	E9Q1V2	0.23	-0.02	-0.41	-0.46	1.61	-0.62	-0.79	-0.82	-0.4	0.61	-0.23	0.52	1.57	2.03	0.23	-0.39	0.01	0.29	1.025	0.985753	0.359894	0.0867901	1	0.996511	0.691619
Cpne5	Q8JZW4	-0.06	0.13	0.69	0.81	0.85	-0.34	1.38	0.65	-0.35	0.09	0.77	0.06	-0.29	0.78	0.78	1.44	0.2425	-0.25	0.285	0.542831	0.436585	0.483449	1	0.996511	0.893925
Cpne6	Q9Z140	0.18	0.17	0.54	0.52	0.51	0.36	0.54	0.65	0.41	1.64	0.58	0.29	0.25	0.42	0.88	0.85	0.1625	0.3775	0.2475	0.354527	0.264087	0.300799	1	0.996511	0.830276
Cpne7	Q0VE82	0.62	0.67	0.04	-0.36	1.4	0.6	0.62	0.02	0.53	0.04	-0.17	0.7	0.32	0.87	0.06	0.43	0.4175	0.0325	0.1775	0.264392	0.919092	0.569101	1	0.996755	0.922588
Cpne8	Q9DC53	0.36	0.46	0.24	-0.17	1.16	0.16	0.77	-0.5	0.61	-0.06	0.39	0.67	0.51	1.58	0.85	0.4	0.175	0.18	0.6125	0.638539	0.464735	0.0745671	1	0.996511	0.671911
Cpne9	A0A0R4J0J1	0.23	0.89	1.03	0.47	0.76	0.11	0.73	0.46	0.14	0.18	0.88	0.23	0.05	0.76	0.42	0.58	-0.14	-0.2975	-0.2025	0.579803	0.288166	0.453169	1	0.996511	0.885993
Cpox	P36552	-0.17	-0.03	0.03	0.09	-0.38	0.09	-0.29	0.2	0.2	0.23	0.23	-0.09	-0.17	0.28	-0.57	-0.33	-0.075	0.1625	-0.1775	0.694911	0.356491	0.45077	1	0.996511	0.885222
Cpped1	Q8BFS6	-0.62	-0.31	-1.01	-0.32	-0.09	-0.75	-0.53	-0.48	-0.16	0.51	-0.35	-0.44	-0.08	0.09	-0.39	-0.66	0.1025	0.455	0.305	0.661432	0.133926	0.263292	1	0.996511	0.81524
Cpq	Q9WVJ3	-0.55	-0.19	-0.67	-0.54	-0.6	-0.23	-0.48	-0.88	0	0.01	-0.33	-0.46	-0.06	-0.33	-1.36	-0.83	-0.06	0.2925	-0.1575	0.766889	0.176559	0.617736	1	0.996511	0.937259
Cpsf1	Q9EPU4	-0.75	-2.09	-1.89	-1.53	-1.16	-1.42	-0.91	-1.55	-1.57	-1.14	-1.54	-1.79	-0.75	-0.83	0.07	-0.66	0.305	0.055	1.0225	0.354183	0.865245	0.017629	1	0.996511	0.602211
Cpsf2	O35218	-1.08	-2.04	-1.4	-1.56	-1.2	-1.71	-0.66	-1.13	-2	-0.99	-1.24	-1.96	-1.31	-1.22	0.23	-0.8	0.345	-0.0275	0.745	0.258451	0.932201	0.0849731	1	0.996755	0.691619
Cpsf3	Q9QXK7	-2.75	-4.02	-1.39	-1.67	-2.76	-3.7	-1.19	-1.62	-4.24	-0.64	-1.47	-3.83	-2.62	-2.7	-1.23	-1.28	0.14	-0.0875	0.5	0.85092	0.92711	0.454871	1	0.996755	0.887169
Cpsf4	E0CXT7	-0.4	-0.85	-1.14	-1.04	-0.65	-0.72	-0.49	-1.01	-1.47	-1.5	-1.04	-0.91	-1.26	-0.91	0.21	-0.15	0.14	-0.3725	0.33	0.529692	0.156924	0.381503	1	0.996511	0.860984
Cpsf6	H3BJ30	-3.62	-5.15	-3.8	-3.39	-4.32	-4.61	-3.77	-3.78	-2.14	-1.83	-3.68	-4.09	-2.05	-0.56	-2.37	-3.58	-0.13	1.055	1.85	0.756901	0.11949	0.0209337	1	0.996511	0.621926
Cpsf7	Q8BTV2-2	-3.07	-4.5	-4.08	-4.53	-3.54	-3.74	-3.79	-4.06	-3.48	-2.49	-3.98	-3.51	-2.95	-3.28	-2.27	-4.1	0.2625	0.68	0.895	0.453856	0.146411	0.0888101	1	0.996511	0.691619
Cpt1a	P97742	0.21	0.47	0.88	1.08	0.84	0.76	1.35	1.09	0.48	0.9	1.22	0.47	0.4	0.31	0.8	1.05	0.35	0.1075	-0.02	0.185297	0.701607	0.943367	1	0.996511	0.991596
Cpt1c	Q8BGD5	-0.67	-0.46	-0.44	-0.29	-0.18	-0.5	-0.06	-0.12	0.03	0.31	-0.2	-0.64	0.4	-0.1	0.3	0.02	0.25	0.34	0.62	0.176945	0.184521	0.0133646	1	0.996511	0.585601
Cpt2	P52825	2.12	1.47	1.43	0.94	1.24	1.67	1.55	1.07	0.47	0.83	1.4	1.69	0.4	0.26	1	1.36	-0.1075	-0.3925	-0.735	0.703378	0.289404	0.0617452	1	0.996511	0.662517
Cptp	Z4YLU2	-1.81	-1.17	-2.17	-2.46	-0.63	-1.4	-1.34	-2.27	-2.03	-2.91	-1.62	-1.98	-1.75	-1.19	-1.95	-1.01	0.4925	-0.2325	0.4275	0.249531	0.54181	0.246188	1	0.996511	0.802442
Cr1l	Q64735-2	0.45	0.28	-0.52	-0.63	0.65	0.68	0.12	-0.28	0.06	-0.7	-0.64	0.62	-0.1	0.18	0.2	-0.06	0.3975	-0.06	0.16	0.268244	0.880278	0.595417	1	0.996511	0.929911
Crabp1	P62965	0.22	-0.69	-1.54	-0.71	-0.51	-0.56	-0.76	0.87	-0.31	0.57	0.2	0.48	-0.56	-0.34	-0.69	-1.62	0.44	0.915	-0.1225	0.371399	0.0427215	0.778135	1	0.996511	0.967289
Cracd	E9Q5L4	1.04	0.97	0.69	0.79	0.58	1.16	0.6	1.06	1.65	1.21	1.04	1.2	1.71	1.61	0.83	0.75	-0.0225	0.4025	0.3525	0.911698	0.0729052	0.235097	1	0.996511	0.791437
Cracdl	F7B0R9	0.03	-0.23	1.86	1.83	-0.48	-0.85	3.4	3.22	0.05	0.86	3.21	0.02	-0.06	0.96	1.82	3.12	0.45	0.1625	0.5875	0.695967	0.847919	0.465478	1	0.996511	0.888369
Cracdl	E9Q3M9	0.54	0.33	0.4	0.65	0.37	0.07	0.1	0.43	0.79	1.09	0.37	0.49	1	0.98	0.4	-0.14	-0.2375	0.205	0.08	0.185805	0.355397	0.786915	1	0.996511	0.968024
Cradd	O88843	-1.49	-0.12	-1.48	-0.65	-0.51	-1.82	-0.49	-0.85	-1.03	-1.71	-1.61	-1.09	-2.13	-1.07	-2.65	-1.61	0.0175	-0.425	-0.93	0.967394	0.265809	0.0651647	1	0.996511	0.66433
Crat	H7BX88	1.08	0.06	1.31	0.97	-0.16	1.07	2.25	1.05	0	0.71	1.62	0.59	-0.09	0.14	1.66	1.59	0.1975	-0.125	-0.03	0.704158	0.761972	0.952358	1	0.996511	0.992476
Crbn	Q8C7D2-2	-0.38	-0.59	-0.19	-0.46	-0.59	-0.13	0.07	-0.26	-1.82	-1.46	-0.03	-0.23	-1.67	-1.87	-0.47	0	0.1775	-0.48	-0.5975	0.378401	0.279592	0.196956	1	0.996511	0.78004
Creb1	Q01147-1	-1.75	-2.42	-1.74	-2.36	-1.5	-2.4	-2.32	-2.33	-2.45	-0.87	-1.92	-2.04	-1.88	-1.46	-1.22	-1.87	-0.07	0.2475	0.46	0.806121	0.51166	0.117087	1	0.996511	0.718608
Crebbp	A0A0U1RQB6	-2.52	-2.71	-1.98	-2.01	-2.61	-2.25	-1.97	-1.81	-1.13	-1.17	-1.76	-2.15	-0.9	-1.77	-2.12	-1.88	0.145	0.7525	0.6375	0.583098	0.0360221	0.0782464	1	0.996511	0.677244
Creg1	K4DI63	-1.76	-2.02	-2.05	-2.48	-5.18	-1.29	-2.21	-2.67	0.24	-1.67	-1.79	-2.52	2.24	-4.85	-2.61	-2.15	-0.76	0.6425	0.235	0.333642	0.269611	0.85929	1	0.996511	0.976627
Creg2	Q8BGC9	-2.81	-2.6	0.64	1.25	-3.41	-1.41	-1.58	0.18	1.63	1.85	1.05	-2.95	2.58	-5.31	1.02	0.56	-0.675	1.275	0.5925	0.563033	0.369165	0.742417	1	0.996511	0.958976
Creld1	Q91XD7	-1.06	-1.32	-3.28	-2.45	-1.88	-0.7	-2.88	-3.06	-0.65	-1.69	-2.9	-1.02	0.78	-3.09	-1.57	-2.31	-0.1025	0.4625	0.48	0.879886	0.484159	0.589116	1	0.996511	0.929131
Creld2	Q9CYA0	-1.5	-1.38	-0.95	-1.27	-0.56	-1.82	-0.21	-0.74	-2.8	-2.85	-1.4	-1.04	-1.44	-2.3	0.51	-0.05	0.4425	-0.7475	0.455	0.230273	0.127523	0.454243	1	0.996511	0.887073
Crh	Q8CIT0	1.18	0.96	0.02	0.86	0.52	1.32	0.25	0.68	1.63	0.15	0.58	1.26	1.92	0.92	0.79	0.58	-0.0625	0.15	0.2975	0.850229	0.708635	0.442824	1	0.996511	0.883549
Crhbp	A0A217FL62	-0.15	0.23	0.4	-0.12	-0.04	0.14	0.19	0.43	-0.83	-0.57	0.32	-0.05	-1.07	-0.98	0.06	0.36	0.09	-0.3725	-0.4975	0.653257	0.231971	0.20942	1	0.996511	0.786218
Crhr1	P35347	-0.22	0.26	1.21	0.66	-0.32	-0.55	-0.52	0.48	-0.58	0.53	1.2	-0.93	-0.53	-0.38	0.02	0.36	-0.705	-0.4225	-0.61	0.0839236	0.437937	0.116665	1	0.996511	0.718608
Crip1	A0A0G2JEK2	-7.97	-10.56	-5.28	-4.81	-9.98	-9.04	-5.08	-4.72	-7.82	-4.87	-4.79	-8.43	-5.38	-10.35	-4.63	-5.86	-0.05	0.6775	0.6	0.976359	0.645831	0.71609	1	0.996511	0.958106
Crip2	Q9DCT8	-3.05	-3.06	-1.86	-1.63	-2.57	-2.7	-1.56	-1.7	-2.79	-1.24	-1.54	-2.47	-2.71	-2.09	-1.83	-2.14	0.2675	0.39	0.2075	0.554146	0.438252	0.612883	1	0.996511	0.935333
Cript	O70333	-8.94	-12.24	-11.32	-10.41	-10.24	-8.44	-9.87	-12.41	-5.17	-6.48	-7.42	-8.32	-6.25	-7.39	-6.11	-11.37	0.4875	3.88	2.9475	0.617848	0.00178449	0.0417067	1	0.996511	0.658454
Crk	Q64010	1.22	0.96	0.42	0.2	0.79	0.85	-0.11	0.18	0.52	-0.37	0.33	1.24	0.15	0.76	0.17	-0.08	-0.2725	-0.27	-0.45	0.410572	0.494829	0.167513	1	0.996511	0.759484
Crk	Q8JZR2	0.03	-0.76	-0.6	-0.26	-0.5	-1.04	-0.06	-0.47	0.05	-0.38	0.22	-0.47	0.03	0.07	-0.39	-0.74	-0.12	0.2525	0.14	0.66142	0.347353	0.620365	1	0.996511	0.93807
Crkl	P47941	0.91	0.8	0.31	0.61	0.92	0.98	0.65	0.76	0.55	0.43	0.43	0.92	0.3	0.97	0.12	0.42	0.17	-0.075	-0.205	0.382285	0.728202	0.432189	1	0.996511	0.879165
Crlf3	Q9Z2L7	-1.08	-0.89	-0.16	0.14	-0.76	-0.82	-1.17	-0.06	-0.47	1.26	-0.12	-1.04	0.48	-0.04	0.06	-0.41	-0.205	0.405	0.52	0.569182	0.449842	0.155296	1	0.996511	0.750763
Crls1	E9PUW6	0.51	1.09	-2.17	-1.07	-1.48	-0.72	-1.59	-1.67	1.89	1.2	-2.04	2.47	2.12	2.67	-1.38	-2.17	-0.955	1.29	0.72	0.197165	0.268944	0.574589	1	0.996511	0.926139
Crmp1	P97427	-3.68	-3.82	-3.47	-4.44	-4.41	-4.06	-4.24	-3.69	-2.25	-3.39	-3.43	-3.49	-1.31	-3.12	-3.03	-4.68	-0.2475	0.7125	0.8175	0.365094	0.0715029	0.233	1	0.996511	0.788994
Crmp1	Q6P1J1	-0.25	-0.26	0.29	0.33	-0.39	-0.33	0.47	0.52	-0.21	0.12	0.66	0.13	-0.62	-0.11	0.15	0.1	0.04	0.1475	-0.1475	0.892192	0.576418	0.582823	1	0.996511	0.927734
Crnkl1	P63154	-0.69	-0.89	-1.29	-1.44	-1.44	-1.11	-1.46	-2.07	-1.19	-1.98	-1.81	-1.26	-0.99	-0.88	-1.37	-2.02	-0.4425	-0.4825	-0.2375	0.129353	0.108222	0.461997	1	0.996511	0.888262
Crocc	Q8CJ40	0.35	-0.35	0.1	0.48	-0.39	-0.1	0.32	0.43	0.23	0.94	0.46	0.06	0.89	-0.11	0.99	0.66	-0.08	0.2775	0.4625	0.767015	0.33154	0.168901	1	0.996511	0.759484
Crocc	Q8CJ40-2	-1.28	0.09	-0.75	-0.9	0.52	-0.28	-3.06	-1.62	0.87	-0.28	-0.67	-0.2	0.39	0.39	-2.01	-1.57	-0.4	0.64	0.01	0.599741	0.150952	0.987463	1	0.996511	0.996154
Crocc2	F6XLV1	0.61	2.06	2.14	0.95	1.38	0.58	1.11	0.62	0.9	1.13	0.81	0.59	1.93	2.28	2.07	1.64	-0.5175	-0.5825	0.54	0.226272	0.158976	0.196347	1	0.996511	0.78004
Crot	Q9DC50	-0.18	-0.14	0.22	0.27	0.36	0.22	0.49	0.31	0.68	0.9	0.5	0.6	0.59	0.48	0.26	0.22	0.3025	0.6275	0.345	0.115786	0.0107201	0.123467	1	0.996511	0.721448
Crppa	A0A1Y7VM96	-0.68	-0.44	-0.39	-0.19	-0.57	-0.84	-0.59	-0.51	-0.83	0.53	-0.42	-0.91	-1.41	-0.52	-0.58	-0.66	-0.2025	0.0175	-0.3675	0.263239	0.958974	0.181617	1	0.996755	0.776002
Crtac1	Q8R555	0.7	0.78	0.49	0.72	0.7	0.68	0.91	0.72	-0.16	0.43	0.49	0.94	-0.3	-0.43	0.66	0.64	0.08	-0.2475	-0.53	0.604435	0.346116	0.115058	1	0.996511	0.717287
Crtc1	Q68ED7	-0.64	-0.23	-0.75	-0.83	-0.42	-0.88	-0.72	-0.96	-0.39	-0.9	-0.84	-0.61	-0.52	-0.08	-1.07	-0.98	-0.1325	-0.0725	-0.05	0.528792	0.738196	0.860061	1	0.996511	0.977204
Crtc2	Q3U182	1.23	0.59	0.15	0.58	-0.2	0.55	-1.38	0.33	1.24	0.54	-0.62	0.9	2.23	0.09	2.85	-0.82	-0.8125	-0.1225	0.45	0.0999702	0.779004	0.580608	1	0.996511	0.927734
Crtc3	Q91X84	-0.09	1.14	0.96	0.03	0.02	-0.05	0.38	0.59	-0.63	0.07	0.6	0.41	-0.15	-0.72	0.77	0.28	-0.275	-0.3975	-0.465	0.424981	0.331578	0.29165	1	0.996511	0.825497
Cry2	Q9R194	-1.6	-1.12	-1.05	-0.94	-1.53	-1.05	-0.98	-0.76	-1.13	-0.15	-0.85	-1	-0.75	0.03	-1.06	-1.29	0.0975	0.395	0.41	0.680014	0.177233	0.230788	1	0.996511	0.788863
Cryab	P23927	0.36	0.33	0.82	0.65	-0.21	-0.23	0.29	-0.03	-1.36	-0.23	-0.59	-1.43	-0.83	-0.57	0.15	0.46	-0.585	-1.4425	-0.7375	0.0166054	0.0015075	0.0479639	1	0.996511	0.658454
Crybb1	E9PYP8	0.05	-0.41	-0.47	-0.1	-0.02	0.03	0.07	0.32	-0.11	0.34	0.23	-0.13	-0.56	-0.31	-1.14	-0.73	0.3325	0.315	-0.4525	0.102083	0.165062	0.0960646	1	0.996511	0.698156
Crybg3	A0A338P6N4	0.55	0.17	-1.13	-0.69	0.21	-0.13	-0.77	-0.58	2.31	0.13	-1.35	0.72	1.62	3.75	-0.46	-0.99	-0.0425	0.7275	1.255	0.918744	0.356999	0.241661	1	0.996511	0.796892
Cryl1	Q99KP3	-1.77	-2.04	-0.73	-1	-1.96	-1.88	-0.72	-0.85	-2.59	-1.01	-0.84	-1.9	-2.43	-1.94	-1.13	-1.08	0.0325	-0.2	-0.26	0.93879	0.677369	0.549116	1	0.996511	0.912757
Crym	O54983	-0.75	-0.85	-0.95	-0.78	-0.62	-0.99	-0.65	-0.65	-0.54	-0.53	-1.01	-0.68	-0.95	-0.02	-0.43	-1.17	0.105	0.1425	0.19	0.518006	0.445392	0.506672	1	0.996511	0.902614
Cryz	P47199	-0.27	-0.33	-0.61	-0.48	-0.17	-0.58	-0.09	-0.56	-0.55	-1.04	-0.95	-0.54	-0.71	-0.17	-0.53	-0.8	0.0725	-0.3475	-0.13	0.701851	0.111185	0.54798	1	0.996511	0.912571
Cryzl1	Q921W4	0.32	0.26	0.21	0.34	-0.08	0.04	0.12	0.28	-0.22	-0.35	0.15	0.14	-0.48	-0.52	0.06	0.05	-0.1925	-0.3525	-0.505	0.228601	0.0891341	0.041855	1	0.996511	0.658454
Cryzl2	Q3UNZ8	0.49	0.16	0.32	0.44	0.23	0.39	1.36	0.41	0.05	-0.03	0.6	0	0.4	-0.01	0.63	1.24	0.245	-0.1975	0.2125	0.38036	0.358693	0.468328	1	0.996511	0.889423
Cs	Q9CZU6	1.1	0.54	0.15	0.57	0.29	0.91	0.26	0.47	0.81	0.07	0.44	0.91	0.54	0.49	-0.37	-0.1	-0.1075	-0.0325	-0.45	0.676022	0.908861	0.168159	1	0.996744	0.759484
Csad	Q9DBE0	0.13	-0.18	0.1	0.1	-0.13	0.13	-0.77	0.37	-0.2	0.02	0.07	-0.17	-0.32	-0.32	-0.14	0.23	-0.1375	-0.1075	-0.175	0.604956	0.539354	0.410655	1	0.996511	0.874811
Csdc2	Q91YQ3	-0.37	-0.34	1.16	1.8	-0.54	-0.37	0.73	1.42	-0.3	2.05	1.27	-0.17	-0.33	-0.09	1.41	1.1	-0.2525	0.15	-0.04	0.699258	0.834279	0.949664	1	0.996511	0.992476
Csde1	Q91W50	-0.93	-1.59	-1.34	-1.61	-1.44	-1.13	-1.43	-1.47	-1.19	-0.5	-1.4	-0.93	-0.96	-0.8	-1.39	-1.67	3.14018e-16	0.3625	0.1625	1	0.197897	0.560115	1	0.996511	0.918806
Cse1l	Q9ERK4	0.01	-0.45	-0.29	-0.4	-0.38	-0.15	-0.45	-0.57	-0.55	-0.25	-0.56	0.15	-0.92	-0.65	-0.37	-0.58	-0.105	-0.02	-0.3475	0.564601	0.930348	0.126426	1	0.996755	0.721505
Csf1r	P09581	-2.11	-2.79	-1.83	-1.99	-2.31	-2.08	-1.79	-1.67	-1.77	-1.6	-1.44	-2.1	-2.31	-1.91	-2.16	-2.04	0.2175	0.4525	0.075	0.418706	0.120972	0.771482	1	0.996511	0.965933
Csk	P41241	0.06	-0.41	-0.74	-1.14	-0.08	-0.07	-0.25	-0.65	-0.63	-1.82	-0.75	0	-0.67	-0.43	-0.76	-0.83	0.295	-0.2425	-0.115	0.321972	0.576799	0.689531	1	0.996511	0.955729
Csl	Q80X68	1.38	1.72	3.05	2.75	0.74	1.03	0.93	2.71	1.14	1.23	1.83	1.27	1.16	-0.26	2.23	2.91	-0.8725	-0.8575	-0.715	0.143557	0.0622615	0.336857	1	0.996511	0.847578
Csmd1	Q923L3	0.14	0.11	0.65	0.61	0.14	0.55	0.72	0.58	0.25	0.63	0.96	0.34	0.41	-0.29	0.16	0.56	0.12	0.1675	-0.1675	0.583532	0.496825	0.530205	1	0.996511	0.908663
Csmd2	V9GX34	0.82	0.47	0.64	0.47	0.92	1.15	0.61	0.52	0.5	0.09	0.56	0.72	0.72	0.6	0.41	0.6	0.2	-0.1325	-0.0175	0.331858	0.522141	0.925293	1	0.996511	0.988527
Csmd3	E9PWJ0	0.38	0.38	0.07	0.03	0.44	0.72	-0.2	0.7	0.58	0.01	0.38	0.49	0.8	0.59	0.02	-0.09	0.2	0.15	0.115	0.42863	0.469689	0.664349	1	0.996511	0.949825
Csnk1a1	E9Q4G7	2.18	0.4	-0.17	0.75	0.68	1.83	-1.6	-1.4	2.06	-2.13	-0.42	1.94	1.82	-1.75	-0.08	-0.79	-0.9125	-0.4275	-0.99	0.311264	0.673837	0.245049	1	0.996511	0.801068
Csnk1a1	Q8BK63-2	-0.14	-0.2	-0.18	-0.17	0.23	-0.04	0.2	0.02	-0.32	-0.38	-0.08	-0.1	-0.72	0.03	-0.47	-0.1	0.275	-0.0475	-0.1425	0.0896164	0.772679	0.525522	1	0.996511	0.908107
Csnk1d	Q9DC28-2	-1.1	-0.6	0.76	-0.36	-1.22	-1.01	-0.31	-0.01	0.56	0.72	0.02	0.06	1.11	0.57	0.39	-0.18	-0.3125	0.665	0.7975	0.495573	0.132382	0.103107	1	0.996511	0.700625
Csnk1d	Q9DC28	0.67	0.24	0.31	0.26	0.14	0.76	0.85	0.27	0.44	0.06	0.43	0.72	0.3	-0.11	0.18	0.47	0.135	0.0425	-0.16	0.552075	0.840571	0.461757	1	0.996511	0.888262
Csnk1e	Q9JMK2	-0.31	-0.11	-0.55	-0.55	-0.63	-0.36	-0.64	-0.62	0.52	-0.84	-0.34	-0.08	0.73	-0.27	-0.98	-1.26	-0.1825	0.195	-0.065	0.312291	0.529321	0.880801	1	0.996511	0.979767
Csnk1g1	A0A0U1RP94	1.57	1.45	0.88	0.34	1.41	1.57	0.13	0.61	0.73	0.76	0.66	2.07	0.5	0.1	1.14	0.12	-0.13	-0.005	-0.595	0.754614	0.990477	0.131466	1	0.999285	0.726398
Csnk1g2	Q99K78	0.43	1.08	0.68	0.58	1.19	1.1	0.5	-0.09	1.08	0.55	0.33	0.54	1.77	1.39	0.52	0.25	-0.0175	-0.0675	0.29	0.956464	0.778482	0.447288	1	0.996511	0.884817
Csnk1g3	Q8C4X2	0.12	0.62	1.15	1.82	0.61	0.16	1.23	1.95	-0.07	1.69	1.37	0.16	-0.64	0.14	0.77	0.64	0.06	-0.14	-0.7	0.902884	0.790397	0.151648	1	0.996511	0.750178
Csnk2a1	Q60737	0.98	1.08	0.92	1.04	1.4	0.87	1.11	1.12	0.59	0.91	1.04	1.07	0.39	0.99	0.85	1.02	0.12	-0.1025	-0.1925	0.482293	0.574218	0.368836	1	0.996511	0.859245
Csnk2a2	O54833	1.48	1.75	1.89	1.64	1.9	1.56	1.67	1.9	0.61	0.88	1.93	1.42	0.22	0.53	1.6	1.67	0.0675	-0.48	-0.685	0.696601	0.146911	0.0926074	1	0.996511	0.695968
Csnk2b	P67871	0.48	0.13	0.29	0.48	0.19	0.98	0.63	0.36	-0.36	0.31	0.5	0.65	-0.35	-0.46	0.41	0.69	0.195	-0.07	-0.2725	0.380023	0.786639	0.384068	1	0.996511	0.860984
Cspg4	Q8VHY0	0.74	1.05	0.25	0.6	1.08	0.83	0.54	0.5	0.94	0.34	0.61	1.19	0.43	1.19	0.31	0.49	0.0775	0.11	-0.055	0.739756	0.68086	0.844004	1	0.996511	0.976225
Cspg5	Q71M36-2	-2.18	-1.22	-2.65	-0.74	-1.47	-1.66	-1.26	-0.78	-0.93	-0.7	-1.17	-1.01	-0.19	-0.63	-2.14	-1.63	0.405	0.745	0.55	0.373007	0.106681	0.351563	1	0.996511	0.853984
Cspg5	Q71M36	-0.7	0.01	0.36	0.63	-0.22	-0.75	0.75	0.43	-0.39	0.52	0.77	0.36	-0.43	0.12	0.41	0.26	-0.0225	0.24	0.015	0.956691	0.520952	0.964902	1	0.996511	0.9927
Cspp1	D3Z378	-1.99	-2.15	0.53	-0.12	-1.28	-1.32	0.6	-0.67	-2.13	0.32	-0.24	-2.17	-2.46	-1.7	1.09	0.51	0.265	-0.1225	0.2925	0.717258	0.883795	0.763902	1	0.996511	0.964134
Csrp1	P97315	-0.68	-1.03	-0.62	-0.62	-0.99	-0.57	-0.95	-0.95	-1.83	-0.49	-0.7	-1.06	-1.3	-1.7	-0.72	-0.61	-0.1275	-0.2825	-0.345	0.491614	0.378079	0.254066	1	0.996511	0.809524
Csrp2	P97314	-2.28	-2.55	-3.14	-2.43	-2.45	-3.27	-3.42	-3.59	-2.87	-2.29	-3.11	-2.6	-2.11	-2.93	-3.3	-2.85	-0.5825	-0.1175	-0.1975	0.0881947	0.668114	0.540408	1	0.996511	0.912212
Cst3	P21460	-0.05	-1.23	-1.34	-1.46	-1.04	-0.42	-0.56	-1.14	-0.11	-2.03	-1.19	0.38	-0.69	0	-1.33	-1.35	0.23	0.2825	0.1775	0.523478	0.629022	0.684175	1	0.996511	0.955729
Cstb	Q62426	-0.76	-0.73	-0.42	-1.01	-0.71	-1.27	1.35	-1	-0.77	-0.54	-0.34	-1.03	-0.94	-0.48	-0.57	0.35	0.3225	0.06	0.32	0.56679	0.790775	0.314261	1	0.996511	0.836924
Cstf1	Q99LC2	-1.28	-2.47	-1.82	-2.27	-1.79	-2.27	-1.5	-2.05	-3.01	-1.86	-1.79	-2.3	-1.95	-1.73	-1.79	-2.31	0.0575	-0.28	0.015	0.851864	0.46015	0.960831	1	0.996511	0.9927
Cstf2	Q8BIQ5-2	-0.77	-0.89	-1.59	-1.62	-0.62	-0.86	-1.31	-1.58	-0.53	-0.19	-1.63	-0.99	-0.55	-0.26	-0.8	-1.46	0.125	0.3825	0.45	0.68611	0.319173	0.209326	1	0.996511	0.786218
Cstf2	F6ZKC7	0.55	1.44	0.07	-0.8	-0.01	-0.61	-1.41	0.84	1.49	2.61	0.01	-1.29	0.01	1.05	0.76	-1.04	-0.6125	0.39	-0.12	0.32817	0.657881	0.842745	1	0.996511	0.976225
Cstf2t	Q8C7E9	-1.34	-1.32	-1.69	-1.46	-1.59	-1.53	-1.48	-1.83	-0.59	-0.73	-1.91	-1.75	0.09	-1.19	-0.63	-1.64	-0.155	0.2075	0.61	0.370666	0.551707	0.129946	1	0.996511	0.723659
Cstf3	Q99LI7	-1.65	-2.67	-2.2	-2.13	-1.81	-2.31	-1.92	-2.1	-2.8	-1.36	-1.94	-2.65	-2.13	-2.32	-1.63	-2.03	0.1275	-0.025	0.135	0.61026	0.947422	0.627453	1	0.996755	0.939823
Cstpp1	Q8BHR8	0.02	-0.39	0.25	0.14	0.35	-0.31	0.67	-0.03	-0.54	0.57	0.41	0.2	-0.52	0.44	0.15	0.58	0.165	0.155	0.1575	0.536301	0.597193	0.597652	1	0.996511	0.930093
Ctbp1	O88712	0.33	0.24	0.29	0.5	-0.14	0.4	0.23	0.3	0.36	0.02	0.44	0.28	-0.18	0.33	-0.29	-0.11	-0.1425	-0.065	-0.4025	0.430962	0.714068	0.0792914	1	0.996511	0.681114
Ctbp2	Q91YZ2	0.02	-0.2	-0.03	0.13	-0.51	-0.28	-0.18	-0.31	-0.34	-0.29	0.02	-0.53	0.13	-0.57	0.26	-0.04	-0.3	-0.265	-0.035	0.088266	0.187502	0.882036	1	0.996511	0.979767
Ctbs	Q8R242	0.51	0.71	-0.2	-0.65	0.07	0.68	0.27	-0.22	-1.53	0.94	-0.12	0.28	-0.95	-0.99	-0.5	-0.17	0.1075	-0.2	-0.745	0.761106	0.722575	0.0671776	1	0.996511	0.664936
Ctc1	Q5SUQ9-2	-4.09	-4.32	-1.67	-2.14	-3.09	-4.35	-2.3	-2.17	-2.94	-1.62	-1.96	-3.57	-2.43	-3.61	-1.57	-1.87	0.0775	0.5325	0.685	0.918424	0.474333	0.361952	1	0.996511	0.858475
Ctcf	Q61164	2.7	1.48	1.58	0.32	1.84	2.62	0.96	0.88	-0.89	0.45	1.25	2.13	-0.06	-0.01	1.85	1.5	0.055	-0.785	-0.7	0.924572	0.298865	0.28791	1	0.996511	0.824705
Ctdnep1	Q3TP92	0.71	1.16	1.62	-0.09	1.18	0.79	0.38	1.24	0.33	-0.31	0.54	0.67	0.7	0.18	1.02	0.74	0.0475	-0.5425	-0.19	0.90361	0.203407	0.62951	1	0.996511	0.940703
Ctdp1	Q7TSG2	-1.02	-1.36	-2	-2.29	-1.11	-1.57	-2.06	-1.86	-1.36	-1.64	-1.66	-0.94	-0.86	-1.11	-2.32	-2.44	0.0175	0.2675	-0.015	0.959332	0.430114	0.974487	1	0.996511	0.992977
Ctdsp1	P58466	0.5	0.79	-0.34	0.44	1.51	0.43	0.23	0.32	1.3	0.1	0.12	0.93	0.51	1.93	1	0.8	0.275	0.265	0.7125	0.460685	0.483475	0.0883371	1	0.996511	0.691619
Ctdspl	G3UXN0	-0.14	0.64	-0.11	-1.98	0.66	-0.37	-0.5	-1.49	1.15	0.03	-0.5	0.31	0.83	0.83	-1.99	-0.9	-0.0275	0.645	0.09	0.96597	0.2995	0.910561	1	0.996511	0.986458
Ctdspl2	Q8BG15-6	1.23	1.33	0.5	0.01	0.9	0.4	0.2	0.29	0.65	-0.59	0.29	0.68	1.23	0.65	1.35	0.91	-0.32	-0.51	0.2675	0.357193	0.234879	0.450872	1	0.996511	0.885233
Cth	Q8VCN5	-0.17	-0.26	-0.17	-0.05	0.06	-0.05	0.44	-0.19	0.07	0.06	0.02	-0.35	-0.3	0.22	-0.05	0.14	0.2275	0.1125	0.165	0.237311	0.531949	0.407695	1	0.996511	0.874084
Ctif	E9Q1U6	-1.73	-1.67	-0.92	-0.88	-1.28	-1.86	-0.87	-1.11	-1.84	0.64	-0.93	-1.67	-1.12	-1.15	-0.76	-0.93	0.02	0.35	0.31	0.948273	0.538532	0.272834	1	0.996511	0.822084
Ctif	Q6PEE2	0.61	-0.48	0.15	-1.02	0.24	0.77	-0.09	-0.07	0.07	-1.12	-0.97	-0.2	0.81	-0.83	-0.46	0.35	0.3975	-0.37	0.1525	0.320317	0.404505	0.753011	1	0.996511	0.961479
Ctnna1	P26231	0.41	0.59	0.78	0.9	0.36	0.49	1.51	0.88	0.79	0.74	0.84	0.66	0.44	0.63	0.49	0.53	0.14	0.0875	-0.1475	0.622068	0.629649	0.448137	1	0.996511	0.884817
Ctnna2	Q61301	1.19	1.14	1.33	1.33	1.43	1.23	1.35	1.36	1.04	1.09	1.54	1.38	0.19	0.82	0.67	1.27	0.095	0.015	-0.51	0.520818	0.936252	0.074493	1	0.996755	0.671911
Ctnna2	Q61301-2	-0.88	1.72	0.58	1.02	1.91	1.96	0.66	0.39	1.71	0.23	0.57	0.54	0.14	1	-0.37	0.66	0.62	0.1525	-0.2525	0.334919	0.794919	0.662453	1	0.996511	0.949645
Ctnna3	Q65CL1	1.16	1.74	3.18	0.93	0.21	2.19	0.36	0.4	1.91	-0.59	1.74	0.66	2.88	-2.59	2.02	2.65	-0.9625	-0.8225	-0.5125	0.151278	0.257793	0.679071	1	0.996511	0.955269
Ctnnb1	Q02248	0.91	0.81	0.97	0.59	1.05	1.29	0.99	0.74	0.44	-0.02	1.26	1.09	0.07	0.24	0.37	0.96	0.1975	-0.1275	-0.41	0.297838	0.682597	0.122926	1	0.996511	0.721448
Ctnnbip1	Q9JJN6	0.21	0.14	0.22	0.44	0.06	0.02	0.14	0.34	-0.32	0.47	0.27	0.26	-0.1	0.1	0.67	0.48	-0.1125	-0.0825	0.035	0.486895	0.708306	0.87951	1	0.996511	0.979626
Ctnnbl1	Q9CWL8	-1.42	-4.33	-3.7	-3.6	-3.24	-2.72	-3.41	-3.14	-3.36	-2.14	-2.8	-3.55	-2.71	-2.55	-1.86	-2.84	0.135	0.3	0.7725	0.820518	0.645182	0.229632	1	0.996511	0.787447
Ctnnd1	P30999-2	0.67	0.74	1.08	1.01	0.35	0.88	0.39	1.91	0.43	0.97	1.83	1.47	3.24	0.55	1.05	1.62	0.0075	0.3	0.74	0.98338	0.362178	0.199558	1	0.996511	0.78004
Ctnnd1	G3X9V2	1.32	0.87	0.94	0.78	1.1	1.51	1.09	1.06	1.04	0.74	1.37	1.53	0.92	1	0.96	0.97	0.2125	0.1925	-0.015	0.293587	0.431028	0.938147	1	0.996511	0.989844
Ctnnd2	E9QKH8	0.96	0.89	1.38	1.1	0.83	1.17	1.27	1.28	0.51	0.82	1.67	1.24	-0.49	-0.8	-0.01	1.34	0.055	-0.0225	-1.0725	0.772475	0.937057	0.0409738	1	0.996755	0.658454
Ctnnd2	A0A2I3BQV6	-1.08	-0.12	-0.4	-0.07	-0.59	-1.07	-0.18	-0.3	-1.12	0.43	-0.27	-0.89	-0.62	0.3	-0.02	0.44	-0.1175	-0.045	0.4425	0.698716	0.910296	0.206921	1	0.996744	0.785338
Ctps1	P70698	-0.15	0.09	0.27	-0.27	-0.01	0.14	0.56	-0.09	-0.24	-0.98	0.33	0.11	-0.16	-0.3	0.15	0.15	0.165	-0.18	-0.025	0.449782	0.569303	0.908678	1	0.996511	0.986458
Ctps2	P70303	-0.22	-0.04	-0.06	-0.09	0.12	-0.16	0.31	-0.09	-0.68	-0.37	-0.53	-0.19	-0.34	-0.09	-0.27	0.31	0.1475	-0.34	0.005	0.391602	0.0856864	0.980962	1	0.996511	0.994858
Ctr9	Q62018	-0.68	-1.99	-1.64	-1.79	-1.61	-1.37	-1.91	-1.01	-1.63	-0.87	-1.79	-1.92	-0.74	-0.88	-0.48	-1.2	0.05	-0.0275	0.7	0.881801	0.939633	0.0592873	1	0.996755	0.661738
Ctsa	G3X8T3	-0.45	-0.67	-1.03	-0.49	-0.87	-0.22	-0.13	-0.37	-0.52	-0.17	-0.08	-0.28	-0.4	-1.14	-0.53	-0.72	0.2625	0.3975	-0.0375	0.273372	0.0826472	0.878305	1	0.996511	0.979626
Ctsb	P10605	0.33	-0.63	-1.41	-1.47	-0.49	0.28	-0.79	-1.6	-1.13	-1.03	-1.11	-0.06	-0.83	-0.94	-1.82	-1.58	0.145	-0.0375	-0.4975	0.783326	0.935398	0.293612	1	0.996755	0.825612
Ctsc	P97821	-0.95	-1.78	-0.04	0.2	-1.44	-0.87	0.28	0.65	-1.06	0.87	0.11	-0.68	-1.24	-1.15	-0.17	0.41	0.2975	0.4525	0.105	0.626153	0.438786	0.850232	1	0.996511	0.976225
Ctsd	P18242	-0.32	-0.76	-0.65	0.63	-0.84	-0.3	0.14	0.65	-0.4	0.44	0.42	-0.25	-0.58	-0.55	-1	-0.39	0.1875	0.3275	-0.355	0.656757	0.390286	0.313953	1	0.996511	0.836827
Ctsf	Q9R013	-0.34	0.18	-2.1	-1.33	-0.49	0.08	-0.91	-1.26	0.45	-1.4	-0.92	-0.19	0.61	-0.32	-1.94	-1.12	0.2525	0.3825	0.205	0.640056	0.526799	0.762788	1	0.996511	0.963993
Ctsh	P49935	-1.95	-1.23	-1.69	-0.47	-0.99	-1.93	-0.73	-1.52	-0.79	-0.72	-0.68	-1.88	-0.62	0.04	-0.79	-1.46	0.0425	0.3175	0.6275	0.914804	0.450013	0.166497	1	0.996511	0.759484
Ctsl	P06797	-1.02	-0.26	-0.85	-0.17	-0.56	-0.5	0.98	-0.54	-0.46	-0.87	0.42	-0.18	-0.74	0.12	-1.07	-0.68	0.42	0.3025	-0.0175	0.318485	0.383716	0.957936	1	0.996511	0.992636
Ctso	Q8BM88	6.68	7.63	3.45	3.31	8.32	7.17	4.57	2.91	4.98	2.36	4.64	7.62	4.08	2.75	5.85	6.3	0.475	-0.3675	-0.5225	0.748123	0.790337	0.671614	1	0.996511	0.952698
Ctss	F6WR04	-1.32	-1.72	-1.05	-0.49	-1.78	-1.59	-0.61	-1.22	-1.99	-1.13	-0.81	-1.95	-1.81	-1.97	-1.89	-1.42	-0.155	-0.325	-0.6275	0.660069	0.401407	0.0611798	1	0.996511	0.661738
Ctsz	Q9WUU7	1.71	0.22	-2.35	-1.7	0.69	1.63	-1.11	-2.47	-1.08	-0.53	-1.89	1.67	-1.23	-1.74	-1.92	-2.19	0.215	0.0725	-1.24	0.853586	0.94618	0.170153	1	0.996755	0.762229
Cttn	Q60598	1.77	0.39	0.53	0.57	0.02	1.48	0.44	0.64	1.13	0.26	0.7	1.53	1.03	-0.09	0.48	0.22	-0.17	0.09	-0.405	0.684442	0.823221	0.310955	1	0.996511	0.834523
Cttnbp2	B9EJA2-5	0.96	0.81	0.86	0.88	0.79	0.89	0.56	0.77	1.05	0.84	0.83	0.97	0.43	1.27	0.34	0.29	-0.125	0.045	-0.295	0.416057	0.777402	0.276843	1	0.996511	0.822084
Cttnbp2nl	Q99LJ0	0.53	0.14	-0.05	0.22	-0.38	0.06	-0.2	-0.09	0.85	1.27	0.02	0.39	0.72	0.21	0.12	-0.17	-0.3625	0.4225	0.01	0.0844955	0.187007	0.968478	1	0.996511	0.992733
Ctu1	Q99J10	-1.14	-0.82	-1.24	-0.57	-1.77	-0.27	-0.87	-0.43	0.64	-0.38	-0.4	-1.05	1.31	-1.96	-0.69	-0.74	0.1075	0.645	0.4225	0.762249	0.108698	0.510272	1	0.996511	0.903419
Ctu2	Q3U308	-0.35	0.03	-0.15	0.32	-0.24	-0.22	-0.16	0.3	0.08	-0.3	0.09	-0.13	-0.28	0.12	-0.74	-0.23	-0.0425	-0.0275	-0.245	0.844275	0.89671	0.353336	1	0.996511	0.855029
Cuedc1	Q8R3V6	-0.55	0.18	0.26	0.58	0.22	-0.32	0	0.53	0.73	0.38	-0.12	0.03	0.42	0.24	-0.18	0.31	-0.01	0.1375	0.08	0.973107	0.657452	0.782436	1	0.996511	0.967642
Cuedc2	A0A494BB93	-1.6	-1.9	-1.6	-1.68	-1.44	-2.13	-1.93	-1.86	-2.1	-1.05	-1.71	-1.69	-1.76	-1.35	-1.67	-2.07	-0.145	0.0575	-0.0175	0.467564	0.819173	0.935723	1	0.996511	0.989767
Cul1	Q9WTX6	0.03	-0.15	0.01	-0.08	-0.02	0.06	-0.3	-0.01	-0.15	-0.12	0.04	-0.04	-0.16	-0.2	-0.02	-0.1	-0.02	-0.02	-0.0725	0.898207	0.899444	0.670888	1	0.996511	0.952558
Cul2	Q9D4H8	-0.24	-0.19	-0.23	-0.41	-0.21	-0.32	-0.28	-0.15	-0.09	-0.68	-0.09	-0.1	0.01	-0.15	-0.32	-0.1	0.0275	0.0275	0.1275	0.849926	0.891889	0.481078	1	0.996511	0.893906
Cul3	Q9JLV5	0.39	-0.22	0.61	0.79	0.11	0.36	0.82	0.92	-0.29	0.49	0.63	0.4	-0.72	0	0.59	0.38	0.16	-0.085	-0.33	0.586228	0.780744	0.368461	1	0.996511	0.859245
Cul4a	Q3TCH7	-0.69	-0.55	-0.77	-0.84	-0.31	-0.7	-1.11	-0.9	-0.9	-0.7	-0.89	-0.64	-0.95	-0.81	-1.26	-1.45	-0.0425	-0.07	-0.405	0.83933	0.681003	0.0850869	1	0.996511	0.691619
Cul4b	A2A432	-1.08	-0.86	-0.43	-0.55	-1.18	-1.11	-0.93	-0.64	-1.02	-0.41	-0.65	-1.26	-1.19	-0.64	-1.16	-1.09	-0.235	-0.105	-0.29	0.293231	0.687044	0.240376	1	0.996511	0.795658
Cul5	Q9D5V5	-0.28	-0.2	-0.34	-0.3	-0.23	-0.35	-0.4	-0.48	-0.77	-0.1	-0.37	-0.27	-0.95	-0.56	-0.83	-0.64	-0.085	-0.0975	-0.465	0.561166	0.622904	0.0290034	1	0.996511	0.637553
Cul7	Q8VE73-3	1.05	-0.16	-0.9	-0.35	-1.71	0.1	-0.52	-0.07	4.78	1.12	-0.91	-0.97	6.51	1.36	1.94	-0.38	-0.46	1.095	2.4475	0.397854	0.396086	0.0987252	1	0.996511	0.698156
Cul9	E9QP09	-0.35	0.07	0.2	0.11	0.07	0.02	0.31	0.34	-0.19	-0.39	0.27	-0.16	-0.05	-0.01	-0.04	-0.04	0.1775	-0.125	-0.0425	0.356163	0.575994	0.827317	1	0.996511	0.973757
Custos	Q3UY34	-2.16	-3.61	-1.84	-1.72	-4.19	-2.9	-2.68	-2.62	-2.71	-1.03	-2.01	-2.85	-2.58	-2.81	-1.63	-2.66	-0.765	0.1825	-0.0875	0.170489	0.743054	0.855133	1	0.996511	0.976225
Cuta	D5MCW4	-0.44	-0.03	-0.58	-0.85	-0.17	-0.34	-0.54	-0.81	-0.27	-2.47	-0.92	0.09	-0.91	0.18	-1.2	-0.66	0.01	-0.4175	-0.1725	0.966232	0.452017	0.616939	1	0.996511	0.937141
Cutc	Q9D8X1	-3.95	-1.99	-2.83	-3.3	-2.27	-4.04	-2.73	-3.42	-2.64	-1.46	-2.81	-2.77	-1.38	-1.43	-2.48	-2.84	-0.0975	0.5975	0.985	0.851567	0.241158	0.08283	1	0.996511	0.688789
Cux1	H3BKT0	-0.29	-1.32	-0.36	-0.48	-1.05	-0.77	0.45	-0.01	-0.2	-1.68	-0.58	-0.38	0.23	-0.51	0.31	0.52	0.2675	-0.0975	0.75	0.50482	0.804077	0.0466429	1	0.996511	0.658454
Cux1	H3BK24	-1.74	-2.4	-0.77	-0.49	-2.05	-1.5	-0.98	-0.88	-1.48	0.28	-1.01	-2.08	-1.02	-2.15	-0.57	-0.47	-0.0025	0.2775	0.2975	0.995824	0.651569	0.585556	1	0.996511	0.928178
Cwc15	Q9JHS9	-1.04	-3.32	-1.71	-1.68	-3.81	-1.6	-1.28	-1.35	-1.73	-2.04	-1	-3.1	-0.42	-3.76	-0.75	-1.65	-0.0725	-0.03	0.2925	0.917689	0.95999	0.71759	1	0.996755	0.958398
Cwc22	B1AYU7	0.82	0.14	0.09	-0.19	-1.29	0.17	-1.02	0.03	-0.06	-0.46	-0.35	0.14	1.08	0.02	0.12	-1.22	-0.7425	-0.3975	-0.215	0.0919559	0.166184	0.659068	1	0.996511	0.949645
Cwc25	Q9DBF7	0	-0.72	-0.49	-1.21	-1.1	-1.41	-0.98	-1.37	-1.28	-0.91	-0.41	-0.79	-0.82	-1.29	-1.03	-1.83	-0.61	-0.2425	-0.6375	0.0516823	0.444365	0.0839902	1	0.996511	0.690249
Cwc27	Q3TKY6	-1.74	-1.28	-2.03	-1.79	-2.33	-2.02	-2.15	-1.75	-1.73	-1.74	-2.03	-1.58	-1.24	-0.59	-1.24	-1.99	-0.3525	-0.06	0.445	0.138347	0.785375	0.200142	1	0.996511	0.78004
Cx3cl1	O35188	-0.56	-0.58	-0.28	-0.75	-0.18	-0.67	0.13	-0.63	-0.87	-0.97	-0.16	-0.56	-0.81	0.07	-0.42	-0.19	0.205	-0.0975	0.205	0.38979	0.680797	0.414392	1	0.996511	0.874945
Cx3cr1	Q9Z0D9	-4	-4.43	-3.65	-2.68	-3.66	-3.9	-4.46	-3.94	-4.84	-2.9	-3.75	-3.81	-4.44	-3.26	-4.73	-4.26	-0.3	-0.135	-0.4825	0.446561	0.789786	0.311775	1	0.996511	0.834523
Cxadr	P97792	0.69	0.52	0.02	0.35	0.7	1.33	1.24	0.61	1.59	-0.59	1.1	1.71	1.14	0.8	0.48	0.5	0.575	0.5575	0.335	0.0419235	0.291652	0.197166	1	0.996511	0.78004
Cxcl12	H7BX38	0.44	-0.42	-1.34	-2.11	0.4	0.31	-0.37	0.1	-1.66	-3.34	0.61	0.55	-1.23	-0.67	-1.06	-1.05	0.9675	-0.1025	-0.145	0.09701	0.917509	0.782648	1	0.996755	0.967642
Cxcl14	Q9WUQ5	-1.21	-1.73	-1.01	-1.44	-2.92	0.51	-2.26	-2.04	1.12	-1.71	-1.24	-1.09	2.68	-2.05	-0.85	-1.22	-0.33	0.6175	0.9875	0.63757	0.315307	0.311763	1	0.996511	0.834523
Cxxc1	Q9CWW7	-4.64	-8.3	-3.29	-2.52	-7.69	-9.31	-4.05	-3.54	-5.68	-0.29	-3.66	-5.06	-2.97	-13.83	-3.45	-3.65	-1.46	1.015	-1.2875	0.39924	0.52289	0.620355	1	0.996511	0.93807
Cyb561	Q60720	-0.46	0.38	0.01	-1.84	1.21	0.6	-0.37	-0.57	0.65	4.63	-1.5	-0.58	0.87	0.95	1.19	0.75	0.695	1.2775	1.4175	0.254546	0.333953	0.0132819	1	0.996511	0.584789
Cyb561d2	A0A0A6YY22	0.14	-0.28	-0.61	0.16	-1.57	-0.11	0.29	0.36	0.71	0.39	0.52	0.63	-0.99	-0.28	1.02	0.02	-0.11	0.71	0.09	0.807957	0.0124183	0.835555	1	0.996511	0.975524
Cyb5a	G5E850	0.3	0.51	0.8	0.41	0.73	0.7	1.59	0.65	0.47	-0.36	0.74	0.58	0.37	0.56	0.92	1.44	0.4125	-0.1475	0.3175	0.137391	0.60126	0.273695	1	0.996511	0.822084
Cyb5b	Q9CQX2	0.54	0.65	-0.02	0.25	0.59	0.44	0.33	0.21	0.46	-0.01	0.23	0.35	0.35	0.85	-0.02	-0.12	0.0375	-0.0975	-0.09	0.853247	0.658065	0.752666	1	0.996511	0.961479
Cyb5d2	Q5SSH8	1.05	1.26	1.41	1.11	0.54	0.69	1.58	1.08	-1.44	2.19	1.37	0.91	-1.38	-1.55	1.42	1.82	-0.235	-0.45	-1.13	0.370646	0.531741	0.186733	1	0.996511	0.776843
Cyb5r1	Q9DB73	0.15	0.28	1.08	1.73	0.25	0.08	1.06	1.76	0.18	1.18	1.62	0.06	-0.12	0.27	1	0.99	-0.0225	-0.05	-0.275	0.963686	0.91932	0.534893	1	0.996755	0.912212
Cyb5r3	Q9DCN2	0.43	-0.01	0.54	0.85	-0.24	0.35	0.81	0.92	0.18	0.63	0.61	0.09	-0.31	0.27	0.3	0.17	0.0075	-0.075	-0.345	0.980853	0.764911	0.203372	1	0.996511	0.782817
Cyb5r4	Q3TDX8	-0.5	0.14	-1.16	-1.19	0.3	-0.46	-1.07	-1.64	-0.27	-0.75	-0.95	-0.25	-0.71	0.66	-1.15	-1.06	-0.04	0.1225	0.1125	0.933946	0.729334	0.818641	1	0.996511	0.972768
Cybc1	Q3TYS2	0.66	0.41	1.47	0.76	0.43	0.2	0.75	1.2	0.15	0.29	1.28	0.65	0.66	0.67	2.1	1.68	-0.18	-0.2325	0.4525	0.56443	0.494805	0.288461	1	0.996511	0.824705
Cyc1	Q9D0M3	1.31	1.42	1.12	0.61	1.26	1.56	1.07	0.99	0.93	0.03	1.11	1.2	0.73	1.04	0.67	1.12	0.105	-0.2975	-0.225	0.658761	0.368515	0.373307	1	0.996511	0.859424
Cycs	P62897	1.09	0.79	0.53	1.11	0.48	1.06	0.18	0.96	0.72	0.12	0.43	0.57	0.24	0.81	-0.34	-0.2	-0.21	-0.42	-0.7525	0.424532	0.0875568	0.0334557	1	0.996511	0.644622
Cyfip1	Q7TMB8	0.4	0.19	0.29	0.57	0.39	0.5	0.77	0.71	-0.29	0.3	0.31	0.22	-0.58	-0.28	-0.04	0.24	0.23	-0.2275	-0.5275	0.203837	0.292167	0.0478555	1	0.996511	0.658454
Cyfip1	A0A0R4J119	1.3	1.29	0.2	0.23	1.73	0.36	0.22	0.57	1.41	0.44	0.27	0.89	0.45	2.14	0.08	0.28	-0.035	-0.0025	-0.0175	0.935662	0.994844	0.973419	1	0.999285	0.992946
Cyfip2	Q5SQX6	0.69	0.37	0.67	0.7	0.53	0.68	0.43	0.57	0.73	0.81	0.65	0.61	-0.18	0.7	0.18	0.24	-0.055	0.0925	-0.3725	0.729647	0.588599	0.143165	1	0.996511	0.742711
Cygb	Q9CX80	-0.47	-1.17	-0.7	-1.17	-1.18	-0.61	-0.01	-0.72	-1.97	-0.65	-0.93	-0.86	-1.54	-1.63	-0.49	-0.41	0.2475	-0.225	-0.14	0.413436	0.512182	0.702976	1	0.996511	0.956859
Cyhr1	Q9QXA1	-5.81	-5.76	-2.8	-2.94	-5.56	-7.26	-2.2	-3.17	-6.77	-2.54	-2.75	-5.58	-6.21	-6.26	-2.9	-3.12	-0.22	-0.0825	-0.295	0.862701	0.945318	0.792573	1	0.996755	0.96933
Cyld	Z4YJJ5	-0.83	-0.21	0.26	0.14	0.03	-1.16	0.83	0.23	-0.7	0.02	0.21	-0.59	-0.81	0.18	0.34	0.06	0.1425	-0.105	0.1025	0.752038	0.750522	0.771283	1	0.996511	0.965933
Cyp20a1	Q8BKE6	1.54	1.41	2.71	0.97	1.48	2.16	2.04	2.23	-0.83	0.07	2.13	1.87	0.02	-1.34	3.21	3.24	0.32	-0.8475	-0.375	0.417838	0.264331	0.729951	1	0.996511	0.958635
Cyp2d22	Q9JKY7	0.39	0.41	0.92	0.95	0.63	0.74	1.56	1.49	0.61	1.08	1.01	0.38	0.66	0.78	1.07	1.11	0.4375	0.1025	0.2375	0.15661	0.683316	0.322141	1	0.996511	0.840788
Cyp2j6	O54750	-0.4	0.26	0.74	-1	0.84	-0.59	1.41	0.24	-0.32	0.15	-0.09	-0.1	-0.92	0.6	0.98	1.54	0.575	0.01	0.65	0.291527	0.978896	0.291916	1	0.998749	0.825497
Cyp2j9	Q924D1	-0.12	0.29	-0.65	-0.17	1.11	0.11	0.5	-0.5	-0.09	0.06	-0.11	0.06	0.28	0.96	0	0.25	0.4675	0.1425	0.535	0.228745	0.54016	0.098131	1	0.996511	0.698156
Cyp2s1	D3Z7F1	0.22	0.69	0.55	0.6	-0.62	-0.39	0.14	0.42	-0.33	-0.21	-0.11	0.47	-0.25	-0.84	0.6	0.08	-0.6275	-0.56	-0.6175	0.0406681	0.0386411	0.0836758	1	0.996511	0.689531
Cyp46a1	Q9WVK8	-0.27	-0.25	-0.01	-0.12	0.21	-0.31	0.56	0.09	-0.33	0.13	-0.02	-0.15	-0.1	0.67	0.38	0.43	0.3	0.07	0.5075	0.187241	0.699484	0.0451123	1	0.996511	0.658454
Cyp4f14	Q9EP75	0.5	0.27	1.25	0.84	1.01	0.88	1.32	1.06	0.81	1.08	1.11	0.51	0.69	0.49	1.07	1.51	0.3525	0.1625	0.225	0.176619	0.552158	0.484616	1	0.996511	0.894377
Cyp4f16	Q99N17	-1.75	0.32	-1.06	-0.37	0.44	-0.48	-0.49	-0.8	-2.02	-2.62	-1.25	-1.51	-1.35	-1.23	-1.95	-0.43	0.3825	-1.135	-0.525	0.435171	0.0469868	0.315274	1	0.996511	0.837729
Cyp4x1	A2A9Y7	0.95	1.03	1.18	-0.19	1.25	1.16	1.1	0.77	-0.15	-0.54	1.01	0.97	-0.48	0.45	1.26	1.57	0.3275	-0.42	-0.0425	0.325999	0.38419	0.934383	1	0.996511	0.989767
Cyp51a1	Q8K0C4	-0.24	0.11	0.09	-0.19	0.29	-0.26	0.49	0.08	-0.22	-0.79	0.16	0.36	0.1	0.41	0.94	0.65	0.2075	-0.065	0.5825	0.340934	0.817108	0.0356021	1	0.996511	0.654189
Cyp7b1	Q60991	-1.3	-0.55	0.58	0.17	-0.54	-0.26	0.96	0.28	-0.22	-0.29	0.17	-0.82	0.57	-0.89	0.52	0.93	0.385	-0.015	0.5575	0.439931	0.9725	0.311743	1	0.997515	0.834523
Cyria	Q8BHZ0	-1.09	-1.32	-1.3	-1.3	-1.3	-1.18	-0.84	-1.04	-1.42	-1.19	-1.19	-1.2	-1.38	-1.01	-1.73	-1.47	0.1625	0.0025	-0.145	0.34596	0.987875	0.503551	1	0.999285	0.901002
Cyrib	A0A2I3BQK1	0.63	2.14	1.08	0.61	2.44	0.51	1.48	0.66	-0.58	-0.46	1.14	0.87	-3.18	0.28	0.99	0.55	0.1575	-0.8725	-1.455	0.76434	0.126139	0.139298	1	0.996511	0.73493
Cyrib	Q921M7	0.1	-0.25	-0.33	-0.12	-0.4	0.19	-0.34	-0.17	0.23	-0.33	-0.39	-0.09	0.09	-0.13	-0.81	-0.74	-0.03	0.005	-0.2475	0.878969	0.981112	0.367013	1	0.998773	0.858904
Cys1	A0A0R4J216	1.12	1.26	1.8	1.33	-0.92	1.97	-1.92	0.47	3.02	0.02	1.47	1.14	3.67	-1.17	0.92	0.39	-1.4775	0.035	-0.425	0.0842919	0.952205	0.643903	1	0.996755	0.944252
Cystm1	D3YVS7	2.08	0.93	1.46	1.42	-0.01	0.5	0.66	0.36	2.05	0.05	1.04	1.46	2.03	0.21	0.67	0.88	-1.095	-0.3225	-0.525	0.00357527	0.483524	0.243441	1	0.996511	0.79948
Cyth1	Q9QX11-2	0.27	0.34	0.29	-0.01	0.63	0.19	-0.24	-0.33	0.14	0.32	0.19	0.32	0.12	0.84	-0.14	-0.15	-0.16	0.02	-0.055	0.522695	0.906138	0.838758	1	0.996744	0.976176
Cyth2	A0A1B0GQW2	-0.7	0.82	-0.33	0.54	0.36	-0.99	-0.86	1.26	0.09	3.25	0.07	-0.3	0.94	2.75	-0.02	-0.31	-0.14	0.695	0.7575	0.811612	0.404444	0.298985	1	0.996511	0.828257
Cyth2	Q99KH2	1.09	1.12	0.69	0.84	1.02	0.99	0.89	1.01	1.19	0.9	0.94	1.31	0.76	1.84	0.36	0.61	0.0425	0.15	-0.0425	0.796711	0.450738	0.901076	1	0.996511	0.983757
Cyth3	O08967	-0.7	-1.04	-0.91	-0.85	-0.77	-0.51	-0.44	-0.98	-0.92	0.07	-1.27	-0.7	-0.66	-0.79	-1.4	-0.4	0.2	0.17	0.0625	0.29544	0.572786	0.806376	1	0.996511	0.971715
Czib	Q8BHG2	-0.14	-0.47	-0.13	-0.56	-1.05	-0.52	-0.27	-0.44	-0.87	-0.95	-0.31	-0.37	-0.48	-1.6	-0.46	-0.56	-0.245	-0.3	-0.45	0.290419	0.216638	0.168779	1	0.996511	0.759484
D030056L22Rik	Q3U2A5	-3.56	-3.26	-0.76	-1.75	-5.22	-2.64	-1.15	-2.32	0.21	2.36	-2.28	-2.12	0.46	-1.98	-1.6	-3.29	-0.5	1.875	0.73	0.608881	0.12937	0.432403	1	0.996511	0.879165
D17h6s53e	Q9Z1R4	-0.35	-0.3	0.87	0.81	-0.35	-0.36	0.68	0.8	0.25	0.65	0.29	-0.86	0.99	-0.02	1.14	1.02	-0.065	-0.175	0.525	0.880425	0.693478	0.225352	1	0.996511	0.787447
D2hgdh	E9QN44	-1.41	-0.76	-1.06	-0.41	-0.49	-0.73	0.24	-0.88	-0.81	-1.46	-2.16	-0.98	0.13	0.49	-3.03	-1.57	0.445	-0.4425	-0.085	0.188612	0.239996	0.910849	1	0.996511	0.986458
D3Ertd751e	Q8BGN2	0.16	0.18	0.78	0.65	0.07	-0.53	1.11	0.26	0.13	0.83	0.18	-0.06	-0.13	0.12	0.27	0.46	-0.215	-0.1725	-0.2625	0.553105	0.524023	0.292468	1	0.996511	0.825497
D430041D05Rik	A0A2R8VKG2	0.58	0.73	0.9	0.9	0.61	0.59	0.59	0.8	0.76	0.7	0.83	0.68	0.75	0.47	0.55	0.61	-0.13	-0.035	-0.1825	0.418927	0.833875	0.333477	1	0.996511	0.845601
D630045J12Rik	D3YTS3	0.42	0.63	0.71	0.51	0.97	0.48	0.74	0.55	0.6	0.32	0.67	0.45	0.38	0.94	0.45	0.64	0.1175	-0.0575	0.035	0.508753	0.741708	0.863748	1	0.996511	0.977235
D6Wsu163e	Q91YN0	-0.19	-0.39	-0.72	-1.08	-0.43	-0.58	-0.92	-0.84	-0.15	-2.07	-0.38	-0.45	-0.17	0.34	-0.16	-1.21	-0.0975	-0.1675	0.295	0.687119	0.712371	0.435941	1	0.996511	0.88254
D8Ertd738e	Q8R1F0	0.73	-0.22	-2.45	-3.18	-1.07	0.19	-3.24	-3.61	0.34	-5.7	-2.77	-0.03	1.6	-0.9	-2.01	-2.61	-0.6525	-0.76	0.3	0.575032	0.614474	0.797103	1	0.996511	0.969727
Daam1	Q8BPM0	0.84	0.67	1.35	0.94	0.7	1.01	1.04	0.92	0.59	0.63	1.23	0.97	0.27	0.36	1.15	1.19	-0.0325	-0.095	-0.2075	0.869494	0.690669	0.494917	1	0.996511	0.89758
Daam2	Q80U19	1.41	1.1	1.3	0.88	1.86	1.67	0.88	0.95	0.43	0.5	1.33	1.7	0.21	0.6	0.63	0.89	0.1675	-0.1825	-0.59	0.551436	0.584915	0.027672	1	0.996511	0.635993
Dab1	F2Z465	0.87	0.87	0.12	0.86	1.35	0.4	-0.18	0.25	0.76	1	0.4	0.79	-0.24	1.6	0.46	0.34	-0.225	0.0575	-0.14	0.533527	0.817025	0.733735	1	0.996511	0.958635
Dab2	E9PX84	-1.01	-0.91	-0.91	-0.72	-0.6	-0.9	-0.72	-0.95	-0.54	-0.98	-0.62	-0.81	-1.1	-0.45	-1.28	-0.53	0.095	0.15	0.0475	0.560887	0.416893	0.848713	1	0.996511	0.976225
Dab2ip	Q3UHC7	0.89	0.71	0.46	0.59	0.92	0.6	0.57	0.21	1.04	0.36	0.52	0.87	0.98	1.39	0.3	0.2	-0.0875	0.035	0.055	0.667984	0.872903	0.858281	1	0.996511	0.976225
Dact2	Q7TN08	-1.82	-0.71	0.14	0.54	-0.15	0.2	-0.54	-0.63	1.01	1.42	0.29	-0.89	2.81	0.16	2.07	-1.38	0.1825	0.92	1.3775	0.722311	0.189358	0.179299	1	0.996511	0.775542
Dact3	Q0PHV7	0.09	-0.37	0.98	0.94	-0.4	0.47	0.33	0.97	1.41	1.86	1.25	0.35	2.42	0.24	1.18	0.68	-0.0675	0.8075	0.72	0.869101	0.0899898	0.199983	1	0.996511	0.78004
Dad1	P61804	-1.58	-1.32	-1.56	-1.34	-0.48	-1.12	-0.46	-1.59	-0.82	-1.17	-1.37	-1.18	-0.45	-0.07	-0.81	-0.74	0.5375	0.315	0.9325	0.0856743	0.125767	0.00271385	1	0.996511	0.453261
Dag1	Q62165	0.93	1.06	0.84	1.12	1.12	0.99	0.84	0.91	0.84	1.44	1.11	1.12	0.67	1.42	0.8	0.67	-0.0225	0.14	-0.0975	0.884727	0.474709	0.676918	1	0.996511	0.953397
Dagla	Q6WQJ1	1.45	1.56	1.8	1.52	1.51	1.11	1.23	1.13	0.44	0.82	1.32	1.23	0.33	0.78	0.7	0.98	-0.3375	-0.63	-0.885	0.0756917	0.0274371	0.00242704	1	0.996511	0.427013
Daglb	Q91WC9	0.18	0.51	0.28	0.02	1.14	0.19	-0.35	-0.35	-0.5	-0.05	-0.21	-0.19	-1.03	0.82	-0.26	0	-0.09	-0.485	-0.365	0.798211	0.0318177	0.354484	1	0.996511	0.855029
Dalrd3	Q6PJN8	-0.88	-0.6	0.18	-0.66	-0.4	-0.75	-0.24	-0.78	-0.67	-0.11	-0.63	-0.94	-1	0.24	-0.77	-0.55	-0.0525	-0.0975	-0.03	0.846916	0.742584	0.932049	1	0.996511	0.989713
Dap	A0A087WRC6	10.85	1.07	6.18	0.96	2.09	10.84	8.75	0.77	3.65	1.4	7.15	10.93	3.96	0.98	8.95	9.65	0.8475	1.0175	1.12	0.780863	0.717692	0.688121	1	0.996511	0.955729
Dap3	G3X9M0	-0.4	-0.32	0.15	0.27	-0.56	-0.39	0.01	0.26	-0.27	0.06	-0.03	-0.74	-0.43	-0.01	0.16	-0.12	-0.095	-0.17	-0.025	0.715183	0.523258	0.918548	1	0.996511	0.986868
Dapk1	Q80YE7-2	0.5	0.22	0.57	0.64	0.56	0.44	0.37	0.79	0.33	0.39	0.46	0.43	0.3	0.26	0.44	0.46	0.0575	-0.08	-0.1175	0.74628	0.643523	0.533372	1	0.996511	0.911674
Dapk3	O54784	-0.82	-0.88	-1.07	-0.97	-0.45	-1.2	-1.53	-1.51	-0.89	-1.82	-1.28	-0.84	-0.79	-0.65	-0.93	-1.51	-0.2375	-0.2725	-0.035	0.382234	0.30066	0.882588	1	0.996511	0.979767
Dars1	Q922B2	-0.33	-1.45	-1.38	-1.35	-0.92	-0.27	-0.64	-1.15	-1.38	-0.97	-1.19	-0.34	-1.41	-0.98	-1.15	-1.21	0.3825	0.1575	-0.06	0.251764	0.648818	0.839222	1	0.996511	0.976218
Dars2	Q8BIP0	0.88	1.26	0.71	0.61	0.31	0.81	0.69	0.68	-0.01	-0.95	0.96	0.4	-0.29	-0.66	-0.15	0.03	-0.2425	-0.765	-1.1325	0.263068	0.0879754	0.00120367	1	0.996511	0.412464
Daxx	O35613	1.18	1.08	1.08	1.07	0.32	0.29	1	1.06	0.42	1.51	1.33	1.02	0.76	-0.12	1.53	1.02	-0.435	-0.0325	-0.305	0.0866281	0.900428	0.387659	1	0.996511	0.864251
Dazap1	Q3UGB5	-3.82	-4.06	-3.39	-3.11	-3.38	-3.81	-3.11	-3.34	-3.89	-1.4	-3.36	-3.08	-3.96	-3.48	-2.38	-3.53	0.185	0.6625	0.2575	0.491921	0.236253	0.510995	1	0.996511	0.90359
Dbh	Q64237	0.51	1.06	0.73	0.76	0.67	0.17	0.74	0.6	0.74	0.68	0.7	0.81	0.5	1.18	0.8	0.57	-0.22	-0.0325	-0.0025	0.294279	0.857852	0.991435	1	0.996511	0.996154
Dbi	P31786	-0.49	-0.3	-0.48	0	-0.4	-0.62	-0.1	0.04	-0.52	-0.55	-0.38	-0.37	-1.08	-0.01	-0.51	-0.17	0.0475	-0.1375	-0.125	0.824227	0.464732	0.659748	1	0.996511	0.949645
Dbn1	Q9QXS6	1.56	1.09	1.3	1.55	0.99	1.29	0.86	1.43	1.1	1.16	1.43	1.27	0.74	0.89	0.92	0.91	-0.2325	-0.135	-0.51	0.272587	0.484953	0.0255547	1	0.996511	0.633075
Dbn1	A0A0R4J1E3	1.5	0.25	0.3	1.01	0.38	1.16	0.99	0.15	1.57	0.71	0.02	1.45	1	1.56	-0.16	-0.3	-0.095	0.1725	-0.24	0.79614	0.697417	0.636649	1	0.996511	0.942665
Dbndd1	H3BK17	0.8	0.59	0.09	-0.02	3.48	-0.52	0.63	-0.17	2.71	-0.81	-0.58	0.85	1.75	1.45	0.13	0.8	0.49	0.1775	0.6675	0.561818	0.814399	0.119519	1	0.996511	0.721448
Dbndd2	Q9CRD4	-0.06	0.05	-1.28	-0.13	0.24	-1.2	-2.02	-1.98	-1.74	0.38	-2.23	-0.64	0.06	-1.38	-1.49	-1.59	-0.885	-0.7025	-0.745	0.141528	0.264773	0.138074	1	0.996511	0.734193
Dbnl	Q62418	0.35	0.04	0	0.56	0.19	0.26	0.22	0.63	0.34	0.46	0.31	0.34	-0.4	0.1	-0.1	-0.13	0.0875	0.125	-0.37	0.664358	0.520808	0.118914	1	0.996511	0.721448
Dbr1	Q923B1	-2.98	-2.57	-2.93	-2.99	-3.45	-2.94	-3.12	-3.1	-3.45	-2.05	-3.52	-2.54	-2.14	-2.72	-2.9	-3.01	-0.285	-0.0225	0.175	0.153626	0.950364	0.491952	1	0.996755	0.897531
Dbt	P53395	0.68	0.79	0.59	0.69	0.55	0.82	0.51	0.36	0.21	0.21	0.66	0.33	-0.11	-0.1	-0.05	0.07	-0.1275	-0.335	-0.735	0.443097	0.090415	0.00195482	1	0.996511	0.419079
Dcaf1	Q80TR8-4	-2.26	-3.13	-1.74	-1.78	-3.2	-2.91	-2.45	-2.29	-0.96	-2.68	-2.3	-2.22	-0.56	-2.29	-3.04	-2.21	-0.485	0.1875	0.2025	0.209442	0.68685	0.721305	1	0.996511	0.958398
Dcaf10	A2AKB9-2	-0.55	0.07	-1.78	-2.13	0.07	-0.39	-2.29	-2.71	-0.36	0.47	-1.38	-0.09	-0.71	-0.13	-1.58	-2.37	-0.2325	0.7575	-0.1	0.764811	0.222588	0.877556	1	0.996511	0.979626
Dcaf11	Q91VU6	-0.97	-1.07	0.97	1.09	-0.2	-1.18	1.23	0.74	-1.5	0.61	1.3	-1.22	-1.16	-1.15	1.04	0.8	0.1425	-0.2075	-0.1225	0.843351	0.80007	0.872297	1	0.996511	0.979626
Dcaf13	Q6PAC3	1.19	0.37	1.15	0.9	-0.01	0.48	0.12	0.83	0.7	0.95	0.77	0.49	0.38	0.02	0.5	0.37	-0.5475	-0.175	-0.585	0.071203	0.471435	0.0408701	1	0.996511	0.658454
Dcaf5	Q80T85	-4.69	-6.37	-1.79	-0.3	-7.24	-5.47	-1.66	-0.98	-2.82	0.84	-1.63	-4.16	-1.67	-5.76	-1.16	-0.98	-0.55	1.345	0.895	0.76243	0.396067	0.574427	1	0.996511	0.926116
Dcaf6	Q9DC22	-0.78	-1	-1.06	-0.16	-0.86	-0.83	-1	-0.88	-0.77	0.26	-0.59	-0.95	-0.63	-0.59	-0.91	-1.32	-0.1425	0.2375	-0.1125	0.538118	0.484006	0.693667	1	0.996511	0.955729
Dcaf7	P61963	-0.16	-0.23	-0.23	-0.07	0.06	-0.32	0.1	-0.12	-0.2	0.18	-0.26	-0.15	-0.09	-0.21	0.05	-0.16	0.1025	0.065	0.07	0.533736	0.712888	0.686771	1	0.996511	0.955729
Dcaf8	Q8N7N5	-0.19	-0.2	0.06	-0.03	-0.44	-0.44	0.18	-0.19	-0.63	0.22	0.53	-0.28	-0.51	-0.37	0.04	0.04	-0.1325	0.05	-0.11	0.503154	0.85742	0.606352	1	0.996511	0.932425
Dcakd	Q8BHC4	0.75	0.66	0.22	-0.22	0.75	1.09	0.55	0.31	1.15	-0.25	0.16	1.22	0.95	0.84	0.38	0.25	0.3225	0.2175	0.2525	0.26877	0.596785	0.403322	1	0.996511	0.870698
Dcc	P70211-3	0.09	0.37	0.48	0.58	0.17	0.02	0.79	0.51	0.21	0.6	0.82	0.41	-0.15	0.55	0.26	0.43	-0.0075	0.13	-0.1075	0.973302	0.541484	0.642602	1	0.996511	0.94365
Dchs1	E9PVD3	0.92	1.24	0.19	0.59	0.59	0.91	0.1	0.27	1.4	1.11	0.12	1.23	1.2	0.4	0.42	0.28	-0.2675	0.23	-0.16	0.365759	0.523986	0.615016	1	0.996511	0.936534
Dclk1	Q80VB6	1.17	1.94	0.84	0.82	2.28	1.44	1.27	1.47	2.47	2.16	1.18	2.31	1.52	3.64	1.45	1.35	0.4225	0.8375	0.7975	0.228867	0.0507857	0.180396	1	0.996511	0.775542
Dclk1	A0A0G2JGQ6	1.46	1.63	0.97	0.81	2.3	0.16	1.39	0.83	0.67	-0.17	0.8	2.57	0.4	0.54	1.13	1.26	-0.0475	-0.25	-0.385	0.917373	0.656983	0.222804	1	0.996511	0.787447
Dclk1	Q8CCN4	0.1	0.42	-0.06	0.06	0.43	0.69	-0.51	0.1	0.3	-1.53	-0.69	-0.73	0.14	1.29	-1.76	-0.67	0.0475	-0.7925	-0.38	0.865833	0.060467	0.529855	1	0.996511	0.908663
Dclk1	H7BX36	0.32	-1.16	0.23	-0.78	-2.49	0.26	-1.07	0.4	-0.62	0.31	0.04	-0.26	1.94	-2.95	0.35	-0.1	-0.3775	0.215	0.1575	0.59099	0.594301	0.870944	1	0.996511	0.979293
Dclk1	Q9JLM8	1.22	0.47	-0.05	0.02	0.58	1.07	0.69	0.11	1.14	0.29	0.41	1.67	0.53	1.25	-0.05	-0.01	0.1975	0.4625	0.015	0.565848	0.282511	0.970436	1	0.996511	0.992767
Dclk2	Q6PGN3-3	0.53	-0.63	-0.19	-0.36	-0.57	0.45	-0.28	-0.3	-0.2	-0.22	-0.32	0.42	-0.31	-0.64	-0.21	0.04	-0.0125	0.0825	-0.1175	0.969067	0.786722	0.695141	1	0.996511	0.955729
Dcn	P28654	-0.79	-0.16	-1.14	-0.68	-0.45	-0.72	-1.08	-0.87	0.14	-1.75	-1.36	-0.34	-0.11	1.26	-2.09	-0.56	-0.0875	-0.135	0.3175	0.730413	0.766594	0.630165	1	0.996511	0.941132
Dcp1a	Q91YD3	-0.94	-0.67	-0.04	0.17	-0.8	-1.22	0.13	0	-1.11	0.07	-0.13	-1.01	-1.15	-0.6	-0.42	-0.45	-0.1025	-0.175	-0.285	0.794148	0.649764	0.381481	1	0.996511	0.860984
Dcp1b	B9EIX0	-1.08	-1.29	-0.11	0	-1.88	-1.55	-0.71	0.12	-1.36	0.64	-0.73	-1.07	-0.77	-1.13	-0.85	-0.31	-0.385	-0.01	-0.145	0.460228	0.984403	0.692179	1	0.998892	0.955729
Dcp2	Q9CYC6	0.03	-0.05	-1.41	-2.03	-0.49	0.28	-1.52	-1.52	0.46	-1.56	-1.7	-0.16	1.46	-1.5	-1.26	-1.66	0.0525	0.125	0.125	0.931596	0.851988	0.877014	1	0.996511	0.979626
Dcps	Q9DAR7	-4.01	-3.63	-3.96	-4.39	-3.23	-4.05	-4.25	-4.36	-3.27	-0.28	-3.58	-3.46	-2.66	-2.21	-4.36	-4.51	0.025	1.35	0.5625	0.932998	0.0929477	0.328219	1	0.996511	0.844932
Dctn1	E9Q586	-1.64	-0.47	0.94	0.16	-0.97	-0.52	1	0.77	-1.19	0.2	0.83	-0.74	-0.72	0.62	0.29	1.35	0.3225	0.0275	0.6375	0.627555	0.966125	0.328676	1	0.996755	0.844943
Dctn1	E9Q3M3	0.23	0.14	0.21	0.34	0.4	0.08	0.26	0.23	0.61	0.7	0.28	0.22	0.32	0.8	0.21	0.09	0.0125	0.2225	0.125	0.934069	0.251994	0.565266	1	0.996511	0.920487
Dctn2	Q99KJ8	1.02	0.92	1.17	0.56	1.01	0.76	1.5	1	0.03	-0.25	1.17	1.09	-0.14	0.41	1.16	1.39	0.15	-0.4075	-0.2125	0.50895	0.29149	0.566469	1	0.996511	0.9216
Dctn3	Q9Z0Y1	0.28	0.4	0.78	0.69	0.76	0.02	0.11	0.38	0.47	1.05	0.57	0.26	0.06	0.74	0.34	0.17	-0.22	0.05	-0.21	0.342238	0.83131	0.378784	1	0.996511	0.860984
Dctn4	Q8CBY8-2	-0.03	-0.13	-0.41	-0.39	0.2	-0.13	-0.23	-0.43	-0.06	-0.1	-0.43	0.06	-0.32	0.51	-0.72	-0.79	0.0925	0.1075	-0.09	0.64038	0.584069	0.778644	1	0.996511	0.967289
Dctn5	Q9QZB9	-0.39	-0.16	-1.09	-0.85	0.53	-0.35	-0.85	-0.99	-0.16	-0.21	-1.15	-0.1	-0.05	0.91	-1.23	-0.95	0.2075	0.2175	0.2925	0.590922	0.51016	0.557158	1	0.996511	0.917092
Dctn6	D3Z6H3	0.39	0.27	0.48	0.58	0.12	0.14	0.22	0.58	0.85	0.84	0.69	0.36	1.01	0.38	0.64	0.18	-0.165	0.255	0.1225	0.35799	0.201628	0.602612	1	0.996511	0.931041
Dctpp1	Q9QY93	0.31	-0.5	-0.21	-0.69	-0.55	0.69	0.06	-0.15	-0.17	0.04	-0.24	0.13	0.5	-0.73	-0.08	0.1	0.285	0.2125	0.22	0.39692	0.415224	0.519606	1	0.996511	0.907667
Dcun1d1	Q9QZ73	-0.63	-0.57	-0.49	-0.64	-0.8	-0.42	-0.48	-0.54	-1.21	-0.94	-0.44	-0.79	-1.15	-1.35	-0.96	-1.23	0.0225	-0.2625	-0.59	0.885811	0.228832	0.00919208	1	0.996511	0.563386
Dcun1d2	Q8BZJ7	0.06	0.47	-0.42	-0.68	0.37	0.15	-0.45	-0.46	0.31	-1.6	-0.71	-0.27	-0.2	0.53	-1.4	-0.81	0.045	-0.425	-0.3275	0.889262	0.356283	0.481363	1	0.996511	0.893906
Dcun1d3	Q8K0V2	0.55	0.63	0.37	0.76	0.21	0.66	-0.29	0.81	1.08	1.26	0.63	0.69	0.7	0.96	0.21	0.29	-0.23	0.3375	-0.0375	0.400204	0.140796	0.87353	1	0.996511	0.979626
Dcun1d4	Q8C5X2	-3.87	-4.37	-3.06	-3.03	-4.56	-4.11	-3.37	-3.37	-4.04	-1.9	-3.09	-3.96	-2.14	-3.76	-3.21	-3.03	-0.27	0.335	0.5475	0.518047	0.546392	0.238132	1	0.996511	0.79296
Dcun1d5	Q9CXV9	-3.41	-3.42	-0.76	-2	-3.49	-3.91	-1.5	-1.98	-4.08	-0.72	-2.18	-3	-3.14	-3.69	-0.43	-2.35	-0.3225	-0.0975	-0.005	0.680449	0.909746	0.995359	1	0.996744	0.998317
Dcx	O88809	0.27	-0.58	-0.83	-1.19	-0.24	-0.06	0.04	-0.49	1.51	-0.12	-0.18	1.24	1.28	-0.67	-0.5	-0.36	0.395	1.195	0.52	0.242615	0.0395439	0.32279	1	0.996511	0.840788
Dcxr	Q91X52	0.71	-0.04	-0.93	-0.44	0.02	0.15	-1.47	-1.03	0.03	-0.16	-0.86	0.02	-0.08	0.09	-1.3	-1.25	-0.4075	-0.0675	-0.46	0.412447	0.862342	0.347459	1	0.996511	0.851503
Dda1	Q9D9Z5	-4.08	-5.53	-1.82	-1.19	-3.73	-5.2	-1.8	-1.86	-3.78	-0.54	-1.31	-3.13	-2.95	-2.76	-1.32	-1.35	0.0075	0.965	1.06	0.994837	0.403063	0.297161	1	0.996511	0.826214
Ddah1	Q9CWS0	2.43	0.88	1.04	1.15	0.99	2.33	0.88	1.32	0.57	0.77	0.89	2.06	0.25	-0.13	0.96	0.79	0.005	-0.3025	-0.9075	0.991161	0.515372	0.0538547	1	0.996511	0.661738
Ddah2	Q99LD8	0.53	-0.19	0.1	0.16	0	0.43	-0.02	0.14	-0.46	-0.42	-0.03	0.46	-0.58	-0.72	0.23	0.36	-0.0125	-0.2625	-0.3275	0.952295	0.351676	0.320097	1	0.996511	0.839402
Ddb1	Q3U1J4	-1.08	-0.96	-0.94	-1.25	-0.92	-1.01	-1.05	-1.32	-1.29	-1.44	-1.02	-1.03	-1.71	-1.24	-1.47	-1.43	-0.0175	-0.1375	-0.405	0.916545	0.466531	0.0618019	1	0.996511	0.662517
Ddc	O88533	0.95	0.38	0.66	0.81	0.24	0.04	1.24	0.61	0.74	0.53	0.4	0.87	0.1	0.66	0.62	0.68	-0.1675	-0.065	-0.185	0.568165	0.753238	0.429296	1	0.996511	0.879165
Ddhd1	F8WIJ5	0.35	0.42	0.64	0.45	0.51	0.4	0.65	0.55	0.5	0.52	0.69	0.36	0.37	0.85	0.23	0.21	0.0625	0.0525	-0.05	0.683213	0.757816	0.816804	1	0.996511	0.972768
Ddhd2	Q80Y98	-0.2	0.1	0.03	0.07	-0.32	-0.2	-0.86	-0.44	-0.25	-0.37	-0.33	-0.1	-0.2	-0.2	-0.55	-0.6	-0.455	-0.2625	-0.3875	0.0419061	0.147715	0.0765761	1	0.996511	0.675786
Ddi2	A2ADY9	-0.13	0.03	-0.33	0.04	-0.17	-0.09	-0.19	-0.19	-0.25	-0.38	-0.42	0.04	-0.3	0.29	-0.82	-0.59	-0.0625	-0.155	-0.2575	0.690797	0.42707	0.36449	1	0.996511	0.858475
Ddn	Q80TS7	2.25	1.02	0.98	0.93	0.86	2.15	0.87	1.16	0.89	1	1.23	1.83	0.84	0.6	-0.04	0.29	-0.035	-0.0575	-0.8725	0.932596	0.876419	0.0382672	1	0.996511	0.658454
Ddost	O54734	-0.16	-0.83	-0.64	-0.78	0.07	0.27	1	-0.4	0.24	-1.1	-0.63	0.1	0.56	-0.35	0.34	0.67	0.8375	0.255	0.9075	0.0271673	0.466311	0.011862	1	0.996511	0.566767
Ddr1	Q03146-2	1.03	1.02	0.87	0.8	1.25	1.17	1.06	0.62	-0.52	0.17	0.74	1.29	-0.82	-0.66	0.71	1.03	0.095	-0.51	-0.865	0.619694	0.200985	0.0806679	1	0.996511	0.684354
Ddrgk1	Q80WW9	-0.89	-1.4	1.13	0.57	-1.36	-0.17	1.26	0.56	1.47	0.8	0.79	-0.71	3.27	-0.8	2.08	2.04	0.22	0.735	1.795	0.766418	0.300252	0.0836031	1	0.996511	0.689531
Ddt	O35215	-0.77	-1.12	-0.22	-0.28	-1.31	-0.57	0.18	-0.48	-1.64	-1.21	-0.41	-0.97	-1.9	-1.44	-1.08	-0.88	0.0525	-0.46	-0.7275	0.882939	0.188959	0.0443862	1	0.996511	0.658454
Ddx1	Q91VR5	-2.22	-2.57	-2.21	-2.33	-1.96	-2.5	-1.82	-2.41	-2.34	-1.69	-2.28	-1.87	-2.67	-1.59	-2.07	-2.2	0.16	0.2875	0.2	0.46014	0.208649	0.456811	1	0.996511	0.887902
Ddx10	Q80Y44	0.87	-0.51	1.5	1.01	-3.26	2.4	-1.06	-0.4	1.49	0.47	1.08	-0.29	3.06	-1.71	0.9	0.22	-1.2975	-0.03	-0.1	0.263037	0.955287	0.917141	1	0.996755	0.986641
Ddx17	Q3U741	-1.48	-3.24	-2.35	-2	-2.5	-2.18	-1.76	-1.86	-2.99	-1.86	-2.17	-2.19	-2.2	-2.6	-1.33	-1.9	0.1925	-0.035	0.26	0.619581	0.933439	0.553235	1	0.996755	0.916262
Ddx18	Q8K363	0.85	0.21	0.35	0.23	0.08	0.84	0.57	0.45	1.34	-0.96	0.5	-0.1	1.98	0.04	-0.19	0.42	0.075	-0.215	0.1525	0.750198	0.652436	0.750844	1	0.996511	0.961479
Ddx19a	Q61655	-0.09	-0.45	0.81	0.83	-0.52	-0.47	0.22	0.82	-0.39	0.58	0.55	-0.14	-0.57	-0.24	0.46	0.54	-0.2625	-0.125	-0.2275	0.540753	0.748746	0.577845	1	0.996511	0.927198
Ddx19b	Q8R3C7	1.48	0.08	-1.07	-0.93	-0.69	1.31	-0.41	-0.82	2.85	-1.01	-0.78	1.37	3.22	-1.27	-1.51	-1.41	-0.0425	0.7175	-0.1325	0.951311	0.4718	0.908675	1	0.996511	0.986458
Ddx20	Q9JJY4	-1.59	-1.36	-2.74	-3.15	0.22	-2.22	-3.04	-3.63	-1.28	-2.1	-3.34	-2.23	-1.61	-1.71	-3.08	-3.03	0.0425	-0.0275	-0.1475	0.960402	0.960742	0.78801	1	0.996755	0.968587
Ddx21	Q9JIK5	1.16	0.12	0.94	1.16	-0.04	0.64	0.69	1.16	0.58	0.72	1.13	0.11	-0.05	0.35	0.84	1.04	-0.2325	-0.21	-0.3	0.497627	0.521883	0.397573	1	0.996511	0.867334
Ddx23	D3Z0M9	0.08	-0.99	-1.1	-1.26	-1.09	-0.51	-0.71	-0.45	-0.41	-1.05	-1.28	-1.32	0.75	-0.53	0.06	-0.59	0.1275	-0.1975	0.74	0.698364	0.586706	0.103643	1	0.996511	0.70231
Ddx24	F8WJA0	0.68	0.5	0.62	0.77	-0.04	0.45	0.37	0.46	0.47	0.64	0.74	0.35	0.47	0.24	0.84	0.86	-0.3325	-0.0925	-0.04	0.0891354	0.600425	0.852536	1	0.996511	0.976225
Ddx25	Q9QY15	-1.12	-0.92	-1.05	-1.14	-1.45	-0.85	-0.86	-0.85	-0.42	0.26	-1.07	-0.77	-0.2	-1.22	-0.81	-1.22	0.055	0.5575	0.195	0.776811	0.0881562	0.477654	1	0.996511	0.89226
Ddx27	Q921N6	0.84	0.71	1.18	0.58	0.44	0.44	0.46	0.86	0.65	1.12	1.13	0.48	0.76	0.76	1.13	1.05	-0.2775	0.0175	0.0975	0.187115	0.941351	0.652551	1	0.996755	0.947633
Ddx28	Q9CWT6	-0.58	-0.04	-0.4	-0.17	2.31	-0.58	-0.5	0.12	0.51	-0.15	-0.18	-0.6	0.61	0.88	-0.34	-0.08	0.635	0.1925	0.565	0.324319	0.487515	0.102576	1	0.996511	0.700625
Ddx39b	Q9Z1N5	-0.89	-3.4	-3.29	-2.53	-2.95	-2.02	-2.47	-2.31	-3.7	-4.06	-2.8	-3.21	-3.79	-3.3	-2.82	-3.49	0.09	-0.915	-0.8225	0.872125	0.146857	0.170635	1	0.996511	0.762322
Ddx3x	Q62167	-0.72	-1.05	-0.41	-0.6	-0.92	-1.26	-0.51	-0.45	-1.12	0.1	-0.61	-0.68	-0.92	-0.97	-0.21	-0.31	-0.09	0.1175	0.0925	0.715322	0.690401	0.729102	1	0.996511	0.958635
Ddx3y	Q62095	-3.32	1.51	2.33	-3.36	-2.94	0.45	-1.5	1.34	-2.94	-5.48	2.12	1.21	0.42	-1.74	2.37	-2.67	0.0475	-0.5625	0.305	0.976459	0.788248	0.856324	1	0.996511	0.976225
Ddx41	A0A1S6GWJ4	-0.7	-0.67	-0.1	-0.19	-0.9	-0.94	-0.73	-0.41	-0.13	0.46	-0.46	-0.72	-0.68	1	-0.18	-0.51	-0.33	0.2025	0.3225	0.161266	0.510736	0.424489	1	0.996511	0.876965
Ddx42	Q810A7	-3.38	-4.18	-2.83	-3.25	-3.87	-3.78	-3.1	-3.44	-3.75	-1.59	-3.03	-3.38	-3.13	-3.45	-2.86	-3.25	-0.1375	0.4725	0.2375	0.672897	0.367298	0.459411	1	0.996511	0.887902
Ddx46	Q569Z5	-1.38	-2.94	-1.43	-1.4	-2.81	-2.32	-1.56	-1.28	-2.13	-1.47	-1.25	-2.5	-1.79	-1.82	-1.05	-1.56	-0.205	-0.05	0.2325	0.671454	0.911895	0.571392	1	0.996744	0.924332
Ddx47	F6QKD2	-0.51	-0.69	-0.64	-0.18	-0.28	-0.37	-0.06	-0.27	-0.36	-0.54	-0.21	-0.57	-0.48	-0.26	0.3	0.28	0.26	0.085	0.465	0.170355	0.664841	0.0979781	1	0.996511	0.698156
Ddx5	Q8BTS0	-0.22	-1.95	-1.39	-1.04	-2	-1.03	-1.35	-0.76	-1.71	-1	-1.21	-1.47	-1.02	-1.72	-0.71	-1.36	-0.135	-0.1975	-0.0525	0.749446	0.605724	0.897114	1	0.996511	0.983509
Ddx50	Q99MJ9	0.78	0.33	0.45	0.52	0.49	0.85	0.21	0.65	0.69	-0.21	0.39	-0.33	0.86	1.67	0.76	0.41	0.03	-0.385	0.405	0.880063	0.18551	0.195984	1	0.996511	0.78004
Ddx51	Q6P9R1	1.12	0.79	0.22	0.32	0.57	0.49	0.77	0.36	0.87	0	0.75	0.37	1.19	0.7	0.6	0.11	-0.065	-0.115	0.0375	0.788303	0.698018	0.904752	1	0.996511	0.985525
Ddx52	Q8K301	1.79	1.53	2.21	0.74	1.26	1.16	1.84	0.99	-3.44	-6.2	2.51	1.63	-3.53	-3.57	1.61	2.17	-0.255	-2.9425	-2.3975	0.469372	0.142471	0.119968	1	0.996511	0.721448
Ddx54	Q8K4L0	0.67	1.11	1.01	0.85	1.01	0.22	0.19	1.08	1.45	0.48	0.4	0.49	1.14	0.95	1.4	1.13	-0.285	-0.205	0.245	0.303469	0.470259	0.241371	1	0.996511	0.796473
Ddx55	E9Q9T6	-3.17	-0.76	0.08	0.52	-3.21	-2.38	0.57	-0.37	-2.23	1.37	-0.15	-3.05	-1.9	0.22	-0.75	0.23	-0.515	-0.1825	0.2825	0.634294	0.87515	0.745316	1	0.996511	0.959729
Ddx56	Q9D0R4	0.67	1.02	0.43	0.86	0.98	0.35	0.07	-0.17	-0.06	-0.12	0.06	0.44	-0.18	0.36	0.75	0.12	-0.4375	-0.665	-0.4825	0.146581	0.0131063	0.0928568	1	0.996511	0.695968
Ddx58	A2AP29	0.36	2.89	-0.54	-0.78	-0.18	1.9	-0.91	-0.75	2.33	-1.23	-1.42	2.6	1.37	-0.81	-1.68	-0.88	-0.4675	0.0875	-0.9825	0.625638	0.943489	0.317589	1	0.996755	0.838864
Ddx6	P54823	-1.39	-2.17	-1.97	-2.1	-1.69	-1.44	-1.76	-2.08	-1.76	-1.44	-1.86	-1.47	-1.83	-1.23	-2.03	-1.88	0.165	0.275	0.165	0.493428	0.261941	0.550003	1	0.996511	0.913564
Decr1	Q9CQ62	-0.04	-0.25	0.23	0.5	-0.41	-0.12	0.21	-0.07	0.47	0.02	0.23	-0.43	0.67	0.29	-0.24	-0.02	-0.2075	-0.0375	0.065	0.372805	0.888499	0.814983	1	0.996511	0.972768
[truncated: 7,116 more rows]

## Sheet: GSEA
* GSEA mouse MSigDB canonical pathways: m2.cp.v2023.1.Mm.symbols
*significant pathways (FDR<0.25) are marked in yellow
SYP MNK1KO / WT				SYP MNK2KO / WT				SYP MNKDKO / WT
canonical pathway	NES	NOM p-val	FDR q-val	canonical pathway	NES	NOM p-val	FDR q-val	canonical pathway	NES	NOM p-val	FDR q-val
REACTOME_TRANSPORT_OF_MATURE_TRANSCRIPT_TO_CYTOPLASM	-0.888115	0.667607	1	REACTOME_TRANSPORT_OF_MATURE_TRANSCRIPT_TO_CYTOPLASM	-2.3427	0	0.00028904	REACTOME_TRANSPORT_OF_MATURE_TRANSCRIPT_TO_CYTOPLASM	1.65137	0.00375052	0.0895918
REACTOME_TRANSPORT_OF_MATURE_MRNAS_DERIVED_FROM_INTRONLESS_TRANSCRIPTS	0.777301	0.816186	1	REACTOME_TRANSPORT_OF_MATURE_MRNAS_DERIVED_FROM_INTRONLESS_TRANSCRIPTS	-2.21124	0	0.00214463	REACTOME_TRANSPORT_OF_MATURE_MRNAS_DERIVED_FROM_INTRONLESS_TRANSCRIPTS	1.83313	0.000903751	0.0311423
REACTOME_NUCLEAR_ENVELOPE_BREAKDOWN	-0.51275	0.995295	1	REACTOME_NUCLEAR_ENVELOPE_BREAKDOWN	-2.18728	0	0.00261439	REACTOME_NUCLEAR_ENVELOPE_BREAKDOWN	1.40766	0.0653465	0.291224
REACTOME_TRANSPORT_OF_THE_SLBP_DEPENDANT_MATURE_MRNA	-0.787229	0.783312	1	REACTOME_TRANSPORT_OF_THE_SLBP_DEPENDANT_MATURE_MRNA	-2.2161	0	0.00293002	REACTOME_TRANSPORT_OF_THE_SLBP_DEPENDANT_MATURE_MRNA	1.46113	0.0542839	0.238355
REACTOME_NUCLEAR_PORE_COMPLEX_NPC_DISASSEMBLY	-0.695592	0.887884	1	REACTOME_NUCLEAR_PORE_COMPLEX_NPC_DISASSEMBLY	-2.16179	0	0.0030029	REACTOME_NUCLEAR_PORE_COMPLEX_NPC_DISASSEMBLY	1.63672	0.0130334	0.0986591
REACTOME_TRANSCRIPTIONAL_REGULATION_BY_SMALL_RNAS	-0.550073	0.986412	1	REACTOME_TRANSCRIPTIONAL_REGULATION_BY_SMALL_RNAS	-2.15233	0	0.00306249	REACTOME_TRANSCRIPTIONAL_REGULATION_BY_SMALL_RNAS	1.43061	0.0663608	0.270306
REACTOME_SUMOYLATION_OF_DNA_REPLICATION_PROTEINS	-1.18072	0.226846	0.884357	REACTOME_SUMOYLATION_OF_DNA_REPLICATION_PROTEINS	-2.01883	0.000295596	0.00908883	REACTOME_SUMOYLATION_OF_DNA_REPLICATION_PROTEINS	1.37951	0.0807616	0.303196
REACTOME_SUMOYLATION_OF_SUMOYLATION_PROTEINS	-1.20708	0.207437	0.850923	REACTOME_SUMOYLATION_OF_SUMOYLATION_PROTEINS	-2.03173	0.000586338	0.0092101	REACTOME_SUMOYLATION_OF_SUMOYLATION_PROTEINS	1.4876	0.0435925	0.206361
REACTOME_COMPLEX_I_BIOGENESIS	-1.26704	0.138691	0.889517	REACTOME_COMPLEX_I_BIOGENESIS	-2.02219	0	0.00947827	REACTOME_COMPLEX_I_BIOGENESIS	-2.03005	0	0.0106753
REACTOME_GLUCOSE_METABOLISM	0.742212	0.913124	1	REACTOME_GLUCOSE_METABOLISM	-2.03181	0	0.0101311	REACTOME_GLUCOSE_METABOLISM	0.721595	0.909601	1
REACTOME_RAB_GERANYLGERANYLATION	-0.912774	0.596665	1	REACTOME_RAB_GERANYLGERANYLATION	-2.03501	0	0.0110114	REACTOME_RAB_GERANYLGERANYLATION	-1.48063	0.0308547	0.117621
REACTOME_POSTMITOTIC_NUCLEAR_PORE_COMPLEX_NPC_REFORMATION	-0.590964	0.958891	1	REACTOME_POSTMITOTIC_NUCLEAR_PORE_COMPLEX_NPC_REFORMATION	-1.99266	0.000554477	0.0111872	REACTOME_POSTMITOTIC_NUCLEAR_PORE_COMPLEX_NPC_REFORMATION	1.04896	0.408874	0.799858
WP_TCA_CYCLE	0.983286	0.469392	1	WP_TCA_CYCLE	-1.99699	0.00170697	0.0112253	WP_TCA_CYCLE	-2.23446	0	0.00208542
REACTOME_MRNA_SPLICING_MINOR_PATHWAY	-0.880512	0.650592	1	REACTOME_MRNA_SPLICING_MINOR_PATHWAY	-2.03613	0.000603682	0.0122956	REACTOME_MRNA_SPLICING_MINOR_PATHWAY	0.700826	0.897681	0.986234
REACTOME_SUMOYLATION_OF_RNA_BINDING_PROTEINS	-0.999883	0.447847	1	REACTOME_SUMOYLATION_OF_RNA_BINDING_PROTEINS	-2.0389	0.000301023	0.0135003	REACTOME_SUMOYLATION_OF_RNA_BINDING_PROTEINS	1.71632	0.00404494	0.0764692
REACTOME_GLYCOLYSIS	0.679522	0.949098	1	REACTOME_GLYCOLYSIS	-1.95653	0	0.016054	REACTOME_GLYCOLYSIS	0.956136	0.52593	0.903601
WP_ELECTRON_TRANSPORT_CHAIN	0.834097	0.784144	1	WP_ELECTRON_TRANSPORT_CHAIN	-1.94647	0	0.016955	WP_ELECTRON_TRANSPORT_CHAIN	-2.06865	0	0.0081292
REACTOME_SNRNP_ASSEMBLY	0.991794	0.458971	1	REACTOME_SNRNP_ASSEMBLY	-1.92618	0	0.0202226	REACTOME_SNRNP_ASSEMBLY	1.35283	0.0883534	0.33032
REACTOME_SUMOYLATION_OF_UBIQUITINYLATION_PROTEINS	-1.24275	0.179029	0.855109	REACTOME_SUMOYLATION_OF_UBIQUITINYLATION_PROTEINS	-1.92209	0.000892061	0.0202307	REACTOME_SUMOYLATION_OF_UBIQUITINYLATION_PROTEINS	1.41413	0.0701781	0.289829
REACTOME_PROCESSING_OF_CAPPED_INTRON_CONTAINING_PRE_MRNA	-1.28226	0.0447642	0.868146	REACTOME_PROCESSING_OF_CAPPED_INTRON_CONTAINING_PRE_MRNA	-1.91038	0	0.0218247	REACTOME_PROCESSING_OF_CAPPED_INTRON_CONTAINING_PRE_MRNA	1.69286	0	0.0863893
REACTOME_RESPIRATORY_ELECTRON_TRANSPORT	-0.938883	0.573824	1	REACTOME_RESPIRATORY_ELECTRON_TRANSPORT	-1.89568	0	0.0246096	REACTOME_RESPIRATORY_ELECTRON_TRANSPORT	-1.84939	0	0.0290733
REACTOME_MITOTIC_PROPHASE	0.72832	0.90833	1	REACTOME_MITOTIC_PROPHASE	-1.84208	0.000670916	0.0401342	REACTOME_MITOTIC_PROPHASE	1.20401	0.192488	0.51304
REACTOME_MRNA_SPLICING	-1.55241	0.00295421	0.579474	REACTOME_MRNA_SPLICING	-1.835	0	0.0412061	REACTOME_MRNA_SPLICING	1.35038	0.0308375	0.330305
REACTOME_REGULATION_OF_HSF1_MEDIATED_HEAT_SHOCK_RESPONSE	-0.620353	0.981706	1	REACTOME_REGULATION_OF_HSF1_MEDIATED_HEAT_SHOCK_RESPONSE	-1.82768	0.00101592	0.0422502	REACTOME_REGULATION_OF_HSF1_MEDIATED_HEAT_SHOCK_RESPONSE	1.2017	0.194084	0.5135
REACTOME_NEUREXINS_AND_NEUROLIGINS	0.519758	0.994252	1	REACTOME_NEUREXINS_AND_NEUROLIGINS	-1.79752	0.00381791	0.0542433	REACTOME_NEUREXINS_AND_NEUROLIGINS	-2.25592	0.000280505	0.00235692
WP_OXIDATIVE_PHOSPHORYLATION	-1.04895	0.382864	1	WP_OXIDATIVE_PHOSPHORYLATION	-1.79167	0.0048627	0.0549021	WP_OXIDATIVE_PHOSPHORYLATION	-1.73451	0.0075419	0.0432182
REACTOME_GLUTATHIONE_CONJUGATION	1.25518	0.170213	0.733114	REACTOME_GLUTATHIONE_CONJUGATION	-1.74353	0.00984952	0.0802985	REACTOME_GLUTATHIONE_CONJUGATION	-1.55866	0.0282705	0.093732
REACTOME_RESPIRATORY_ELECTRON_TRANSPORT_ATP_SYNTHESIS_BY_CHEMIOSMOTIC_COUPLING_AND_HEAT_PRODUCTION_BY_UNCOUPLING_PROTEINS	-0.845366	0.771608	1	REACTOME_RESPIRATORY_ELECTRON_TRANSPORT_ATP_SYNTHESIS_BY_CHEMIOSMOTIC_COUPLING_AND_HEAT_PRODUCTION_BY_UNCOUPLING_PROTEINS	-1.73265	0.000760746	0.0851845	REACTOME_RESPIRATORY_ELECTRON_TRANSPORT_ATP_SYNTHESIS_BY_CHEMIOSMOTIC_COUPLING_AND_HEAT_PRODUCTION_BY_UNCOUPLING_PROTEINS	-1.79349	0	0.0306519
REACTOME_SUMOYLATION_OF_CHROMATIN_ORGANIZATION_PROTEINS	-0.941575	0.548091	1	REACTOME_SUMOYLATION_OF_CHROMATIN_ORGANIZATION_PROTEINS	-1.72061	0.00576107	0.0911422	REACTOME_SUMOYLATION_OF_CHROMATIN_ORGANIZATION_PROTEINS	1.8471	0.000302252	0.0285843
REACTOME_RHOBTB2_GTPASE_CYCLE	0.557364	0.972089	1	REACTOME_RHOBTB2_GTPASE_CYCLE	-1.70872	0.0100708	0.0938404	REACTOME_RHOBTB2_GTPASE_CYCLE	-1.2933	0.142743	0.246071
REACTOME_VOLTAGE_GATED_POTASSIUM_CHANNELS	-0.908779	0.584769	1	REACTOME_VOLTAGE_GATED_POTASSIUM_CHANNELS	-1.70201	0.0101956	0.0958536	REACTOME_VOLTAGE_GATED_POTASSIUM_CHANNELS	-1.31662	0.118224	0.224851
REACTOME_GENE_SILENCING_BY_RNA	-0.781413	0.804383	1	REACTOME_GENE_SILENCING_BY_RNA	-1.70913	0.00507463	0.096696	REACTOME_GENE_SILENCING_BY_RNA	1.36592	0.0878918	0.314519
REACTOME_TRAFFICKING_OF_AMPA_RECEPTORS	1.16531	0.242165	0.85019	REACTOME_TRAFFICKING_OF_AMPA_RECEPTORS	-1.67256	0.0117109	0.117409	REACTOME_TRAFFICKING_OF_AMPA_RECEPTORS	-1.48981	0.0444198	0.116573
REACTOME_REGULATION_OF_INSULIN_SECRETION	-0.656211	0.956608	1	REACTOME_REGULATION_OF_INSULIN_SECRETION	-1.66055	0.00653808	0.125238	REACTOME_REGULATION_OF_INSULIN_SECRETION	-1.65024	0.00582465	0.0625415
REACTOME_RAB_REGULATION_OF_TRAFFICKING	-0.721387	0.948201	1	REACTOME_RAB_REGULATION_OF_TRAFFICKING	-1.65534	0.0019802	0.12671	REACTOME_RAB_REGULATION_OF_TRAFFICKING	-1.44862	0.0191599	0.133359
REACTOME_TBC_RABGAPS	0.971685	0.482241	1	REACTOME_TBC_RABGAPS	-1.64493	0.0201855	0.133213	REACTOME_TBC_RABGAPS	-1.45702	0.0516667	0.128903
REACTOME_TRAFFICKING_OF_GLUR2_CONTAINING_AMPA_RECEPTORS	1.68584	0.0167995	0.161513	REACTOME_TRAFFICKING_OF_GLUR2_CONTAINING_AMPA_RECEPTORS	-1.63804	0.0265917	0.136517	REACTOME_TRAFFICKING_OF_GLUR2_CONTAINING_AMPA_RECEPTORS	-1.62217	0.0229416	0.0733791
REACTOME_POTASSIUM_CHANNELS	-1.03822	0.391105	1	REACTOME_POTASSIUM_CHANNELS	-1.62591	0.00804559	0.145134	REACTOME_POTASSIUM_CHANNELS	-1.19951	0.157843	0.320736
REACTOME_COMPLEMENT_CASCADE	1.15998	0.272902	0.844041	REACTOME_COMPLEMENT_CASCADE	1.94962	0.000983445	0.146041	REACTOME_COMPLEMENT_CASCADE	1.26496	0.186331	0.426354
REACTOME_THE_CITRIC_ACID_TCA_CYCLE_AND_RESPIRATORY_ELECTRON_TRANSPORT	0.921426	0.64801	1	REACTOME_THE_CITRIC_ACID_TCA_CYCLE_AND_RESPIRATORY_ELECTRON_TRANSPORT	-1.58813	0.000473037	0.185502	REACTOME_THE_CITRIC_ACID_TCA_CYCLE_AND_RESPIRATORY_ELECTRON_TRANSPORT	-1.94134	0	0.0172057
REACTOME_CELLULAR_RESPONSE_TO_HEAT_STRESS	-0.721402	0.937947	1	REACTOME_CELLULAR_RESPONSE_TO_HEAT_STRESS	-1.57444	0.00574493	0.198811	REACTOME_CELLULAR_RESPONSE_TO_HEAT_STRESS	1.05994	0.361254	0.780881
WP_G_PROTEIN_SIGNALING_PATHWAYS	0.998573	0.441384	1	WP_G_PROTEIN_SIGNALING_PATHWAYS	-1.56746	0.00622483	0.203232	WP_G_PROTEIN_SIGNALING_PATHWAYS	-2.13382	0	0.00470417
REACTOME_CHAPERONIN_MEDIATED_PROTEIN_FOLDING	0.782386	0.78629	1	REACTOME_CHAPERONIN_MEDIATED_PROTEIN_FOLDING	-1.5436	0.0312774	0.232583	REACTOME_CHAPERONIN_MEDIATED_PROTEIN_FOLDING	-1.82633	0.00255464	0.0303788
REACTOME_SIGNAL_AMPLIFICATION	1.16149	0.25852	0.847016	REACTOME_SIGNAL_AMPLIFICATION	-1.53827	0.0374862	0.235398	REACTOME_SIGNAL_AMPLIFICATION	-1.81031	0.0037889	0.0284604
REACTOME_RAB_GEFS_EXCHANGE_GTP_FOR_GDP_ON_RABS	-0.863972	0.711223	1	REACTOME_RAB_GEFS_EXCHANGE_GTP_FOR_GDP_ON_RABS	-1.50058	0.0144352	0.258446	REACTOME_RAB_GEFS_EXCHANGE_GTP_FOR_GDP_ON_RABS	-1.2564	0.103878	0.272488
REACTOME_SIGNALING_BY_FGFR2	-0.703592	0.903442	1	REACTOME_SIGNALING_BY_FGFR2	-1.48966	0.0359604	0.260931	REACTOME_SIGNALING_BY_FGFR2	-1.12072	0.27064	0.416863
REACTOME_PYRUVATE_METABOLISM	-0.717553	0.834852	1	REACTOME_PYRUVATE_METABOLISM	-1.51857	0.0488732	0.261447	REACTOME_PYRUVATE_METABOLISM	-1.8249	0.00500527	0.0301647
REACTOME_INTEGRATION_OF_ENERGY_METABOLISM	1.00881	0.425756	1	REACTOME_INTEGRATION_OF_ENERGY_METABOLISM	-1.49199	0.0249653	0.262254	REACTOME_INTEGRATION_OF_ENERGY_METABOLISM	-1.67088	0.00293064	0.0596634
REACTOME_G_PROTEIN_MEDIATED_EVENTS	1.17514	0.230099	0.831868	REACTOME_G_PROTEIN_MEDIATED_EVENTS	-1.50459	0.0352373	0.262312	REACTOME_G_PROTEIN_MEDIATED_EVENTS	-2.11315	0	0.00572804
REACTOME_GLUTAMATE_NEUROTRANSMITTER_RELEASE_CYCLE	0.770026	0.796321	1	REACTOME_GLUTAMATE_NEUROTRANSMITTER_RELEASE_CYCLE	-1.50111	0.0488608	0.262869	REACTOME_GLUTAMATE_NEUROTRANSMITTER_RELEASE_CYCLE	-1.84188	0.00481026	0.0297122
REACTOME_THROMBOXANE_SIGNALLING_THROUGH_TP_RECEPTOR	0.944508	0.522536	1	REACTOME_THROMBOXANE_SIGNALLING_THROUGH_TP_RECEPTOR	-1.50695	0.0528096	0.263909	REACTOME_THROMBOXANE_SIGNALLING_THROUGH_TP_RECEPTOR	-1.65622	0.0212936	0.0617568
REACTOME_MITOCHONDRIAL_FATTY_ACID_BETA_OXIDATION	-0.388333	0.999643	1	REACTOME_MITOCHONDRIAL_FATTY_ACID_BETA_OXIDATION	-1.48428	0.0441261	0.264735	REACTOME_MITOCHONDRIAL_FATTY_ACID_BETA_OXIDATION	-1.95184	0.00111111	0.0187203
REACTOME_PROTEIN_PROTEIN_INTERACTIONS_AT_SYNAPSES	1.02512	0.399678	1	REACTOME_PROTEIN_PROTEIN_INTERACTIONS_AT_SYNAPSES	-1.49252	0.0197322	0.266519	REACTOME_PROTEIN_PROTEIN_INTERACTIONS_AT_SYNAPSES	-2.02865	0	0.0102331
REACTOME_ADP_SIGNALLING_THROUGH_P2Y_PURINOCEPTOR_1	1.0384	0.397871	1	REACTOME_ADP_SIGNALLING_THROUGH_P2Y_PURINOCEPTOR_1	-1.50855	0.053749	0.266805	REACTOME_ADP_SIGNALLING_THROUGH_P2Y_PURINOCEPTOR_1	-1.55536	0.0404489	0.0950165
REACTOME_NUCLEAR_ENVELOPE_NE_REASSEMBLY	-0.800235	0.803877	1	REACTOME_NUCLEAR_ENVELOPE_NE_REASSEMBLY	-1.50875	0.0180579	0.272339	REACTOME_NUCLEAR_ENVELOPE_NE_REASSEMBLY	0.542948	0.995712	0.994209
REACTOME_G_PROTEIN_ACTIVATION	-0.837575	0.677809	1	REACTOME_G_PROTEIN_ACTIVATION	-1.4682	0.0702817	0.286969	REACTOME_G_PROTEIN_ACTIVATION	-1.49205	0.0606695	0.117121
REACTOME_CHROMOSOME_MAINTENANCE	-1.35193	0.0993051	0.782877	REACTOME_CHROMOSOME_MAINTENANCE	-1.46222	0.0467871	0.292088	REACTOME_CHROMOSOME_MAINTENANCE	-0.635352	0.958132	0.969069
REACTOME_NEURONAL_SYSTEM	0.951952	0.61934	1	REACTOME_NEURONAL_SYSTEM	-1.43761	0.000713267	0.299999	REACTOME_NEURONAL_SYSTEM	-1.73981	0	0.0425371
REACTOME_INOSITOL_PHOSPHATE_METABOLISM	-1.12422	0.282255	0.985565	REACTOME_INOSITOL_PHOSPHATE_METABOLISM	-1.44315	0.0496285	0.300175	REACTOME_INOSITOL_PHOSPHATE_METABOLISM	-1.76166	0.0031591	0.0374768
REACTOME_L1CAM_INTERACTIONS	1.11447	0.265837	0.888394	REACTOME_L1CAM_INTERACTIONS	-1.44019	0.0348525	0.300412	REACTOME_L1CAM_INTERACTIONS	-2.14328	0	0.00809043
REACTOME_RNA_POLYMERASE_II_TRANSCRIPTION_TERMINATION	-0.685755	0.943379	1	REACTOME_RNA_POLYMERASE_II_TRANSCRIPTION_TERMINATION	-1.44517	0.028581	0.301626	REACTOME_RNA_POLYMERASE_II_TRANSCRIPTION_TERMINATION	1.65797	0.00502585	0.091269
WP_MECP2_AND_ASSOCIATED_RETT_SYNDROME	-1.60838	0.0201123	0.562329	WP_MECP2_AND_ASSOCIATED_RETT_SYNDROME	-1.44621	0.0636521	0.304782	WP_MECP2_AND_ASSOCIATED_RETT_SYNDROME	-1.08486	0.323291	0.464487
REACTOME_GABA_B_RECEPTOR_ACTIVATION	-0.932545	0.551356	1	REACTOME_GABA_B_RECEPTOR_ACTIVATION	-1.44992	0.0529568	0.308679	REACTOME_GABA_B_RECEPTOR_ACTIVATION	-1.63943	0.012082	0.0664746
WP_GLYCOGEN_METABOLISM	1.33051	0.11479	0.678822	WP_GLYCOGEN_METABOLISM	-1.44628	0.0538769	0.309937	WP_GLYCOGEN_METABOLISM	-1.81154	0.00193584	0.0285921
REACTOME_CA2_PATHWAY	0.975278	0.479858	1	REACTOME_CA2_PATHWAY	-1.42223	0.0661806	0.322717	REACTOME_CA2_PATHWAY	-1.83695	0.00248756	0.029663
WP_GLYCOLYSIS_AND_GLUCONEOGENESIS	-0.961863	0.506852	1	WP_GLYCOLYSIS_AND_GLUCONEOGENESIS	-1.41449	0.0590298	0.332213	WP_GLYCOLYSIS_AND_GLUCONEOGENESIS	-2.0012	0.000847937	0.0136198
WP_OXIDATIVE_STRESS_AND_REDOX_PATHWAY	1.10952	0.274501	0.891193	WP_OXIDATIVE_STRESS_AND_REDOX_PATHWAY	-1.40707	0.040208	0.341345	WP_OXIDATIVE_STRESS_AND_REDOX_PATHWAY	-1.20093	0.160995	0.319787
BIOCARTA_VIP_PATHWAY	0.622929	0.925112	1	BIOCARTA_VIP_PATHWAY	-1.40054	0.0985353	0.349016	BIOCARTA_VIP_PATHWAY	-1.82158	0.00496894	0.0285057
REACTOME_LDL_CLEARANCE	1.11945	0.314035	0.893653	REACTOME_LDL_CLEARANCE	-1.3977	0.0988387	0.349399	REACTOME_LDL_CLEARANCE	-1.5773	0.0391315	0.0866729
REACTOME_PHASE_II_CONJUGATION_OF_COMPOUNDS	1.37264	0.0775802	0.649992	REACTOME_PHASE_II_CONJUGATION_OF_COMPOUNDS	-1.38641	0.0582329	0.366606	REACTOME_PHASE_II_CONJUGATION_OF_COMPOUNDS	-1.50822	0.0239464	0.112103
WP_DRAVET_SYNDROME_SCN1AA1783V_POINT_MUTATION_MODEL	-0.852585	0.728174	1	WP_DRAVET_SYNDROME_SCN1AA1783V_POINT_MUTATION_MODEL	-1.37402	0.0469993	0.381446	WP_DRAVET_SYNDROME_SCN1AA1783V_POINT_MUTATION_MODEL	-1.24844	0.113304	0.277707
BIOCARTA_TCR_PATHWAY	0.819334	0.717031	1	BIOCARTA_TCR_PATHWAY	-1.36753	0.0984911	0.384293	BIOCARTA_TCR_PATHWAY	-1.91942	0.0015748	0.019305
REACTOME_GLUCAGON_LIKE_PEPTIDE_1_GLP1_REGULATES_INSULIN_SECRETION	-0.981363	0.478814	1	REACTOME_GLUCAGON_LIKE_PEPTIDE_1_GLP1_REGULATES_INSULIN_SECRETION	-1.37446	0.0981091	0.386004	REACTOME_GLUCAGON_LIKE_PEPTIDE_1_GLP1_REGULATES_INSULIN_SECRETION	-1.53871	0.0369458	0.101447
REACTOME_SUMOYLATION_OF_DNA_DAMAGE_RESPONSE_AND_REPAIR_PROTEINS	-1.50292	0.0236151	0.65337	REACTOME_SUMOYLATION_OF_DNA_DAMAGE_RESPONSE_AND_REPAIR_PROTEINS	-1.363	0.0688273	0.388418	REACTOME_SUMOYLATION_OF_DNA_DAMAGE_RESPONSE_AND_REPAIR_PROTEINS	1.23112	0.162754	0.468519
REACTOME_BIOLOGICAL_OXIDATIONS	1.46085	0.0233821	0.479209	REACTOME_BIOLOGICAL_OXIDATIONS	-1.36773	0.0334487	0.389264	REACTOME_BIOLOGICAL_OXIDATIONS	-1.48924	0.0140578	0.116272
REACTOME_SIGNALING_BY_NTRKS	0.928704	0.573502	1	REACTOME_SIGNALING_BY_NTRKS	-1.34711	0.0697273	0.396265	REACTOME_SIGNALING_BY_NTRKS	-1.66654	0.00392927	0.059666
REACTOME_INTERCONVERSION_OF_NUCLEOTIDE_DI_AND_TRIPHOSPHATES	-0.972583	0.495083	1	REACTOME_INTERCONVERSION_OF_NUCLEOTIDE_DI_AND_TRIPHOSPHATES	-1.35534	0.115117	0.399237	REACTOME_INTERCONVERSION_OF_NUCLEOTIDE_DI_AND_TRIPHOSPHATES	-1.28333	0.160636	0.251287
REACTOME_EPHB_MEDIATED_FORWARD_SIGNALING	1.19078	0.212363	0.801972	REACTOME_EPHB_MEDIATED_FORWARD_SIGNALING	-1.34746	0.0944882	0.400572	REACTOME_EPHB_MEDIATED_FORWARD_SIGNALING	-2.05566	0	0.00841446
REACTOME_DOWNSTREAM_SIGNALING_EVENTS_OF_B_CELL_RECEPTOR_BCR	0.696148	0.946281	1	REACTOME_DOWNSTREAM_SIGNALING_EVENTS_OF_B_CELL_RECEPTOR_BCR	-1.34166	0.0667802	0.40276	REACTOME_DOWNSTREAM_SIGNALING_EVENTS_OF_B_CELL_RECEPTOR_BCR	-2.09968	0	0.00595855
WP_METAPATHWAY_BIOTRANSFORMATION	1.87361	0.00069979	0.0709346	WP_METAPATHWAY_BIOTRANSFORMATION	-1.34878	0.0742061	0.402971	WP_METAPATHWAY_BIOTRANSFORMATION	-1.0075	0.432662	0.568663
REACTOME_BETA_CATENIN_INDEPENDENT_WNT_SIGNALING	1.08935	0.283459	0.912221	REACTOME_BETA_CATENIN_INDEPENDENT_WNT_SIGNALING	-1.34976	0.0392786	0.406125	REACTOME_BETA_CATENIN_INDEPENDENT_WNT_SIGNALING	-2.13455	0	0.00564501
WP_FATTY_ACID_BETAOXIDATION	0.542251	0.985661	1	WP_FATTY_ACID_BETAOXIDATION	-1.32955	0.110341	0.423836	WP_FATTY_ACID_BETAOXIDATION	-1.82466	0.00497375	0.0295712
REACTOME_METABOLISM_OF_WATER_SOLUBLE_VITAMINS_AND_COFACTORS	-0.82349	0.791065	1	REACTOME_METABOLISM_OF_WATER_SOLUBLE_VITAMINS_AND_COFACTORS	-1.32532	0.059438	0.427833	REACTOME_METABOLISM_OF_WATER_SOLUBLE_VITAMINS_AND_COFACTORS	-1.36662	0.0415951	0.187898
REACTOME_INWARDLY_RECTIFYING_K_CHANNELS	-1.20769	0.216743	0.859282	REACTOME_INWARDLY_RECTIFYING_K_CHANNELS	-1.31038	0.126057	0.456941	REACTOME_INWARDLY_RECTIFYING_K_CHANNELS	-1.40202	0.0881175	0.159407
REACTOME_COLLAGEN_BIOSYNTHESIS_AND_MODIFYING_ENZYMES	1.11219	0.309182	0.889034	REACTOME_COLLAGEN_BIOSYNTHESIS_AND_MODIFYING_ENZYMES	1.76946	0.00589454	0.459878	REACTOME_COLLAGEN_BIOSYNTHESIS_AND_MODIFYING_ENZYMES	1.74895	0.00618188	0.0570423
REACTOME_REGULATION_OF_INSULIN_LIKE_GROWTH_FACTOR_IGF_TRANSPORT_AND_UPTAKE_BY_INSULIN_LIKE_GROWTH_FACTOR_BINDING_PROTEINS_IGFBPS	1.46684	0.0357474	0.475008	REACTOME_REGULATION_OF_INSULIN_LIKE_GROWTH_FACTOR_IGF_TRANSPORT_AND_UPTAKE_BY_INSULIN_LIKE_GROWTH_FACTOR_BINDING_PROTEINS_IGFBPS	1.6092	0.0137843	0.460601	REACTOME_REGULATION_OF_INSULIN_LIKE_GROWTH_FACTOR_IGF_TRANSPORT_AND_UPTAKE_BY_INSULIN_LIKE_GROWTH_FACTOR_BINDING_PROTEINS_IGFBPS	1.66291	0.00363003	0.0909874
BIOCARTA_NOS1_PATHWAY	1.26711	0.177949	0.741898	BIOCARTA_NOS1_PATHWAY	-1.30604	0.151205	0.461479	BIOCARTA_NOS1_PATHWAY	-1.61751	0.0212604	0.0744948
WP_P38_MAPK_SIGNALING_PATHWAY	-0.853904	0.666791	1	WP_P38_MAPK_SIGNALING_PATHWAY	1.61412	0.0219711	0.479322	WP_P38_MAPK_SIGNALING_PATHWAY	1.28323	0.154411	0.41114
REACTOME_DNA_REPAIR	-1.48855	0.0121335	0.622732	REACTOME_DNA_REPAIR	1.69266	0.000647836	0.485663	REACTOME_DNA_REPAIR	1.0954	0.288255	0.704381
REACTOME_COLLAGEN_FORMATION	1.13776	0.275301	0.875127	REACTOME_COLLAGEN_FORMATION	1.70957	0.00842565	0.499095	REACTOME_COLLAGEN_FORMATION	1.6326	0.0154878	0.0922235
REACTOME_FORMATION_OF_INCISION_COMPLEX_IN_GG_NER	-0.956616	0.508188	1	REACTOME_FORMATION_OF_INCISION_COMPLEX_IN_GG_NER	1.6169	0.019742	0.510959	REACTOME_FORMATION_OF_INCISION_COMPLEX_IN_GG_NER	1.04782	0.394762	0.789861
REACTOME_ACTIVATION_OF_KAINATE_RECEPTORS_UPON_GLUTAMATE_BINDING	0.679364	0.890411	1	REACTOME_ACTIVATION_OF_KAINATE_RECEPTORS_UPON_GLUTAMATE_BINDING	-1.27294	0.153131	0.514299	REACTOME_ACTIVATION_OF_KAINATE_RECEPTORS_UPON_GLUTAMATE_BINDING	-1.68987	0.0116784	0.0557434
REACTOME_ACTIVATION_OF_G_PROTEIN_GATED_POTASSIUM_CHANNELS	-1.25497	0.180597	0.88378	REACTOME_ACTIVATION_OF_G_PROTEIN_GATED_POTASSIUM_CHANNELS	-1.27708	0.164578	0.515528	REACTOME_ACTIVATION_OF_G_PROTEIN_GATED_POTASSIUM_CHANNELS	-1.34191	0.120769	0.204872
BIOCARTA_GPCR_PATHWAY	0.919286	0.565547	1	BIOCARTA_GPCR_PATHWAY	-1.2738	0.164885	0.517944	BIOCARTA_GPCR_PATHWAY	-1.81751	0.00446546	0.0285057
REACTOME_RNA_POLYMERASE_III_TRANSCRIPTION	0.781322	0.744783	1	REACTOME_RNA_POLYMERASE_III_TRANSCRIPTION	-1.26618	0.190722	0.51988	REACTOME_RNA_POLYMERASE_III_TRANSCRIPTION	-0.751658	0.791217	0.908826
REACTOME_EXTRACELLULAR_MATRIX_ORGANIZATION	0.892881	0.682702	1	REACTOME_EXTRACELLULAR_MATRIX_ORGANIZATION	1.72843	0.00160043	0.520231	REACTOME_EXTRACELLULAR_MATRIX_ORGANIZATION	1.2787	0.0966164	0.416085
REACTOME_THROMBIN_SIGNALLING_THROUGH_PROTEINASE_ACTIVATED_RECEPTORS_PARS	1.03332	0.406168	1	REACTOME_THROMBIN_SIGNALLING_THROUGH_PROTEINASE_ACTIVATED_RECEPTORS_PARS	-1.2772	0.15511	0.521182	REACTOME_THROMBIN_SIGNALLING_THROUGH_PROTEINASE_ACTIVATED_RECEPTORS_PARS	-1.44748	0.0672742	0.133491
REACTOME_RNA_POLYMERASE_III_TRANSCRIPTION_INITIATION_FROM_TYPE_1_PROMOTER	0.782943	0.752278	1	REACTOME_RNA_POLYMERASE_III_TRANSCRIPTION_INITIATION_FROM_TYPE_1_PROMOTER	-1.27945	0.177507	0.521465	REACTOME_RNA_POLYMERASE_III_TRANSCRIPTION_INITIATION_FROM_TYPE_1_PROMOTER	-0.743473	0.800469	0.912531
REACTOME_METABOLISM_OF_VITAMINS_AND_COFACTORS	-0.862151	0.748197	1	REACTOME_METABOLISM_OF_VITAMINS_AND_COFACTORS	-1.2671	0.0607029	0.523247	REACTOME_METABOLISM_OF_VITAMINS_AND_COFACTORS	-1.25818	0.0783429	0.272231
REACTOME_AMINE_LIGAND_BINDING_RECEPTORS	-1.24805	0.194986	0.885711	REACTOME_AMINE_LIGAND_BINDING_RECEPTORS	1.55849	0.0367287	0.525804	REACTOME_AMINE_LIGAND_BINDING_RECEPTORS	1.2489	0.202562	0.452755
REACTOME_FORMATION_OF_A_POOL_OF_FREE_40S_SUBUNITS	2.71727	0	0	REACTOME_FORMATION_OF_A_POOL_OF_FREE_40S_SUBUNITS	1.62437	0.00604396	0.529141	REACTOME_FORMATION_OF_A_POOL_OF_FREE_40S_SUBUNITS	2.66092	0	0
REACTOME_TRANSPORT_OF_INORGANIC_CATIONS_ANIONS_AND_AMINO_ACIDS_OLIGOPEPTIDES	-0.783727	0.842022	1	REACTOME_TRANSPORT_OF_INORGANIC_CATIONS_ANIONS_AND_AMINO_ACIDS_OLIGOPEPTIDES	-1.25911	0.10378	0.532521	REACTOME_TRANSPORT_OF_INORGANIC_CATIONS_ANIONS_AND_AMINO_ACIDS_OLIGOPEPTIDES	-1.25679	0.106025	0.273053
REACTOME_ASSEMBLY_OF_COLLAGEN_FIBRILS_AND_OTHER_MULTIMERIC_STRUCTURES	0.858363	0.644237	1	REACTOME_ASSEMBLY_OF_COLLAGEN_FIBRILS_AND_OTHER_MULTIMERIC_STRUCTURES	1.54911	0.0400723	0.533267	REACTOME_ASSEMBLY_OF_COLLAGEN_FIBRILS_AND_OTHER_MULTIMERIC_STRUCTURES	1.30749	0.153618	0.388813
REACTOME_DEACTIVATION_OF_THE_BETA_CATENIN_TRANSACTIVATING_COMPLEX	-0.864075	0.64825	1	REACTOME_DEACTIVATION_OF_THE_BETA_CATENIN_TRANSACTIVATING_COMPLEX	1.64941	0.0204212	0.535442	REACTOME_DEACTIVATION_OF_THE_BETA_CATENIN_TRANSACTIVATING_COMPLEX	1.15941	0.280803	0.576883
WP_GLUTATHIONE_METABOLISM	0.6945	0.859495	1	WP_GLUTATHIONE_METABOLISM	-1.25533	0.18329	0.536522	WP_GLUTATHIONE_METABOLISM	-1.02817	0.422136	0.546892
REACTOME_EUKARYOTIC_TRANSLATION_INITIATION	2.59244	0	0	REACTOME_EUKARYOTIC_TRANSLATION_INITIATION	1.66195	0.0030299	0.548489	REACTOME_EUKARYOTIC_TRANSLATION_INITIATION	2.48551	0	0
REACTOME_MAPK_TARGETS_NUCLEAR_EVENTS_MEDIATED_BY_MAP_KINASES	-1.35501	0.108249	0.788882	REACTOME_MAPK_TARGETS_NUCLEAR_EVENTS_MEDIATED_BY_MAP_KINASES	1.55938	0.0317108	0.554826	REACTOME_MAPK_TARGETS_NUCLEAR_EVENTS_MEDIATED_BY_MAP_KINASES	0.678135	0.888213	0.97727
REACTOME_ACTIVATION_OF_THE_MRNA_UPON_BINDING_OF_THE_CAP_BINDING_COMPLEX_AND_EIFS_AND_SUBSEQUENT_BINDING_TO_43S	2.22073	0	0.000596684	REACTOME_ACTIVATION_OF_THE_MRNA_UPON_BINDING_OF_THE_CAP_BINDING_COMPLEX_AND_EIFS_AND_SUBSEQUENT_BINDING_TO_43S	1.53628	0.0220176	0.555484	REACTOME_ACTIVATION_OF_THE_MRNA_UPON_BINDING_OF_THE_CAP_BINDING_COMPLEX_AND_EIFS_AND_SUBSEQUENT_BINDING_TO_43S	2.11799	0.0001459	0.00032043
REACTOME_COLLAGEN_DEGRADATION	0.756433	0.785606	1	REACTOME_COLLAGEN_DEGRADATION	1.57561	0.0316549	0.558842	REACTOME_COLLAGEN_DEGRADATION	1.3046	0.159098	0.389919
REACTOME_METABOLISM_OF_CARBOHYDRATES	0.763617	0.963665	1	REACTOME_METABOLISM_OF_CARBOHYDRATES	-1.23789	0.0582121	0.559498	REACTOME_METABOLISM_OF_CARBOHYDRATES	0.762572	0.927348	1
REACTOME_TNFR1_INDUCED_PROAPOPTOTIC_SIGNALING	-0.525716	0.975877	1	REACTOME_TNFR1_INDUCED_PROAPOPTOTIC_SIGNALING	1.45612	0.0727095	0.559755	REACTOME_TNFR1_INDUCED_PROAPOPTOTIC_SIGNALING	1.39145	0.101118	0.290725
REACTOME_NONSENSE_MEDIATED_DECAY_NMD_INDEPENDENT_OF_THE_EXON_JUNCTION_COMPLEX_EJC	2.60784	0	0	REACTOME_NONSENSE_MEDIATED_DECAY_NMD_INDEPENDENT_OF_THE_EXON_JUNCTION_COMPLEX_EJC	1.46474	0.0295249	0.562454	REACTOME_NONSENSE_MEDIATED_DECAY_NMD_INDEPENDENT_OF_THE_EXON_JUNCTION_COMPLEX_EJC	2.49304	0	0
REACTOME_RHO_GTPASES_ACTIVATE_NADPH_OXIDASES	-1.55719	0.0377359	0.599589	REACTOME_RHO_GTPASES_ACTIVATE_NADPH_OXIDASES	-1.24281	0.195251	0.563962	REACTOME_RHO_GTPASES_ACTIVATE_NADPH_OXIDASES	-1.20783	0.222599	0.315372
REACTOME_RECYCLING_PATHWAY_OF_L1	1.01538	0.42977	1	REACTOME_RECYCLING_PATHWAY_OF_L1	-1.24042	0.164288	0.564458	REACTOME_RECYCLING_PATHWAY_OF_L1	-1.92826	0.000864304	0.0191152
REACTOME_SIGNALING_BY_FGFR	-0.836388	0.725706	1	REACTOME_SIGNALING_BY_FGFR	-1.2382	0.149443	0.564479	REACTOME_SIGNALING_BY_FGFR	-0.927248	0.575092	0.695844
REACTOME_RNA_POLYMERASE_I_TRANSCRIPTION	-0.813444	0.735145	1	REACTOME_RNA_POLYMERASE_I_TRANSCRIPTION	1.45889	0.0607243	0.566765	REACTOME_RNA_POLYMERASE_I_TRANSCRIPTION	1.61827	0.0149536	0.101661
REACTOME_ACETYLCHOLINE_NEUROTRANSMITTER_RELEASE_CYCLE	0.663372	0.897342	1	REACTOME_ACETYLCHOLINE_NEUROTRANSMITTER_RELEASE_CYCLE	-1.22651	0.208551	0.567138	REACTOME_ACETYLCHOLINE_NEUROTRANSMITTER_RELEASE_CYCLE	-1.58235	0.0316521	0.0857685
REACTOME_SIGNALING_BY_FGFR3	0.898842	0.592915	1	REACTOME_SIGNALING_BY_FGFR3	-1.22792	0.203998	0.569021	REACTOME_SIGNALING_BY_FGFR3	-1.44425	0.0631016	0.134608
WP_AMINO_ACID_METABOLISM	-0.400538	1	1	WP_AMINO_ACID_METABOLISM	-1.22963	0.126546	0.570203	WP_AMINO_ACID_METABOLISM	-1.96393	0	0.016956
REACTOME_PLATELET_CALCIUM_HOMEOSTASIS	-0.706444	0.840297	1	REACTOME_PLATELET_CALCIUM_HOMEOSTASIS	-1.23034	0.213622	0.574029	REACTOME_PLATELET_CALCIUM_HOMEOSTASIS	-1.52517	0.0527845	0.107717
WP_ESTROGEN_SIGNALING	-1.14457	0.249117	0.951197	WP_ESTROGEN_SIGNALING	1.44739	0.0432143	0.575431	WP_ESTROGEN_SIGNALING	1.36645	0.0706211	0.318426
WP_EUKARYOTIC_TRANSCRIPTION_INITIATION	-1.1281	0.291568	0.979592	WP_EUKARYOTIC_TRANSCRIPTION_INITIATION	1.62651	0.0175575	0.577361	WP_EUKARYOTIC_TRANSCRIPTION_INITIATION	1.66933	0.0114223	0.0890523
WP_MECHANISMS_ASSOCIATED_WITH_PLURIPOTENCY	-1.4188	0.0189652	0.675419	WP_MECHANISMS_ASSOCIATED_WITH_PLURIPOTENCY	1.46487	0.0127332	0.580694	WP_MECHANISMS_ASSOCIATED_WITH_PLURIPOTENCY	1.40072	0.0212955	0.283338
REACTOME_SIGNALING_BY_TGFB_FAMILY_MEMBERS	-0.65151	0.961634	1	REACTOME_SIGNALING_BY_TGFB_FAMILY_MEMBERS	1.4699	0.0396126	0.580915	REACTOME_SIGNALING_BY_TGFB_FAMILY_MEMBERS	1.23897	0.165415	0.460291
REACTOME_RETROGRADE_TRANSPORT_AT_THE_TRANS_GOLGI_NETWORK	0.594806	0.983243	1	REACTOME_RETROGRADE_TRANSPORT_AT_THE_TRANS_GOLGI_NETWORK	1.44005	0.0514394	0.586182	REACTOME_RETROGRADE_TRANSPORT_AT_THE_TRANS_GOLGI_NETWORK	0.996021	0.473369	0.855312
REACTOME_INTEGRIN_CELL_SURFACE_INTERACTIONS	0.963672	0.49834	1	REACTOME_INTEGRIN_CELL_SURFACE_INTERACTIONS	1.56013	0.0219979	0.588323	REACTOME_INTEGRIN_CELL_SURFACE_INTERACTIONS	0.873282	0.662777	0.978004
REACTOME_CLASS_A_1_RHODOPSIN_LIKE_RECEPTORS	-1.30575	0.0911917	0.862622	REACTOME_CLASS_A_1_RHODOPSIN_LIKE_RECEPTORS	1.47297	0.0278985	0.589288	REACTOME_CLASS_A_1_RHODOPSIN_LIKE_RECEPTORS	1.56839	0.0118864	0.124447
REACTOME_TELOMERE_MAINTENANCE	-1.26598	0.170966	0.878949	REACTOME_TELOMERE_MAINTENANCE	-1.21455	0.201513	0.593879	REACTOME_TELOMERE_MAINTENANCE	0.658098	0.908698	0.980503
REACTOME_RHOB_GTPASE_CYCLE	-1.59937	0.0114075	0.550087	REACTOME_RHOB_GTPASE_CYCLE	1.42926	0.0486674	0.594711	REACTOME_RHOB_GTPASE_CYCLE	-0.98154	0.494015	0.61235
REACTOME_NUCLEOTIDE_SALVAGE	1.2593	0.185543	0.738547	REACTOME_NUCLEOTIDE_SALVAGE	-1.21101	0.228084	0.597966	REACTOME_NUCLEOTIDE_SALVAGE	-0.856643	0.651801	0.796233
REACTOME_HDACS_DEACETYLATE_HISTONES	-0.982632	0.475168	1	REACTOME_HDACS_DEACETYLATE_HISTONES	1.47535	0.0605914	0.601341	REACTOME_HDACS_DEACETYLATE_HISTONES	1.77167	0.00363216	0.0472881
WP_OXIDATIVE_DAMAGE_RESPONSE	0.867688	0.644329	1	WP_OXIDATIVE_DAMAGE_RESPONSE	1.39219	0.0979381	0.602143	WP_OXIDATIVE_DAMAGE_RESPONSE	0.733576	0.821331	1
REACTOME_GLOBAL_GENOME_NUCLEOTIDE_EXCISION_REPAIR_GG_NER	-1.48041	0.0373228	0.630451	REACTOME_GLOBAL_GENOME_NUCLEOTIDE_EXCISION_REPAIR_GG_NER	1.43068	0.052094	0.605666	REACTOME_GLOBAL_GENOME_NUCLEOTIDE_EXCISION_REPAIR_GG_NER	0.850538	0.699299	0.973715
REACTOME_SIGNALING_BY_TGF_BETA_RECEPTOR_COMPLEX	-0.650214	0.952849	1	REACTOME_SIGNALING_BY_TGF_BETA_RECEPTOR_COMPLEX	1.48473	0.0394659	0.608491	REACTOME_SIGNALING_BY_TGF_BETA_RECEPTOR_COMPLEX	1.16212	0.247765	0.575401
REACTOME_IMMUNOREGULATORY_INTERACTIONS_BETWEEN_A_LYMPHOID_AND_A_NON_LYMPHOID_CELL	-0.573201	0.96114	1	REACTOME_IMMUNOREGULATORY_INTERACTIONS_BETWEEN_A_LYMPHOID_AND_A_NON_LYMPHOID_CELL	1.51632	0.0451235	0.610006	REACTOME_IMMUNOREGULATORY_INTERACTIONS_BETWEEN_A_LYMPHOID_AND_A_NON_LYMPHOID_CELL	0.913392	0.58363	0.968529
WP_DELTANOTCH_SIGNALING_PATHWAY	-0.830676	0.738418	1	WP_DELTANOTCH_SIGNALING_PATHWAY	1.49619	0.0348584	0.611236	WP_DELTANOTCH_SIGNALING_PATHWAY	1.40695	0.0663464	0.287244
WP_MICROGLIA_PATHOGEN_PHAGOCYTOSIS_PATHWAY	-0.790889	0.765483	1	WP_MICROGLIA_PATHOGEN_PHAGOCYTOSIS_PATHWAY	1.39253	0.084066	0.614316	WP_MICROGLIA_PATHOGEN_PHAGOCYTOSIS_PATHWAY	-0.836815	0.710814	0.823806
BIOCARTA_CXCR4_PATHWAY	1.13093	0.295092	0.867815	BIOCARTA_CXCR4_PATHWAY	-1.20164	0.223814	0.618623	BIOCARTA_CXCR4_PATHWAY	-1.67195	0.0182002	0.0598764
REACTOME_DEGRADATION_OF_THE_EXTRACELLULAR_MATRIX	-0.73298	0.878729	1	REACTOME_DEGRADATION_OF_THE_EXTRACELLULAR_MATRIX	1.77955	0.00314748	0.619553	REACTOME_DEGRADATION_OF_THE_EXTRACELLULAR_MATRIX	1.18264	0.228783	0.534175
WP_CYTOPLASMIC_RIBOSOMAL_PROTEINS	2.70611	0	0	WP_CYTOPLASMIC_RIBOSOMAL_PROTEINS	1.4139	0.047885	0.621841	WP_CYTOPLASMIC_RIBOSOMAL_PROTEINS	2.51959	0	0
BIOCARTA_P38MAPK_PATHWAY	-0.714458	0.843195	1	BIOCARTA_P38MAPK_PATHWAY	1.47592	0.0631161	0.622095	BIOCARTA_P38MAPK_PATHWAY	1.30146	0.15367	0.386573
REACTOME_RHOQ_GTPASE_CYCLE	-0.384503	0.999823	0.999653	REACTOME_RHOQ_GTPASE_CYCLE	1.38284	0.0772476	0.623178	REACTOME_RHOQ_GTPASE_CYCLE	-1.21714	0.153465	0.306329
WP_TRANSLATION_FACTORS	0.993316	0.460915	1	WP_TRANSLATION_FACTORS	1.39349	0.0730512	0.624655	WP_TRANSLATION_FACTORS	0.822741	0.746673	0.973545
REACTOME_NON_INTEGRIN_MEMBRANE_ECM_INTERACTIONS	0.827961	0.688706	1	REACTOME_NON_INTEGRIN_MEMBRANE_ECM_INTERACTIONS	1.48641	0.0658191	0.626536	REACTOME_NON_INTEGRIN_MEMBRANE_ECM_INTERACTIONS	1.18213	0.256905	0.530273
REACTOME_NONHOMOLOGOUS_END_JOINING_NHEJ	-1.50837	0.0467358	0.664832	REACTOME_NONHOMOLOGOUS_END_JOINING_NHEJ	1.40405	0.0898736	0.628489	REACTOME_NONHOMOLOGOUS_END_JOINING_NHEJ	-0.862121	0.65609	0.791308
WP_TGFBETA_SIGNALING_PATHWAY	-1.42676	0.0827246	0.685194	WP_TGFBETA_SIGNALING_PATHWAY	1.41599	0.0880401	0.629911	WP_TGFBETA_SIGNALING_PATHWAY	1.11878	0.314851	0.651094
REACTOME_RNA_POLYMERASE_II_PRE_TRANSCRIPTION_EVENTS	-1.15378	0.237844	0.933654	REACTOME_RNA_POLYMERASE_II_PRE_TRANSCRIPTION_EVENTS	1.39969	0.0605622	0.630377	REACTOME_RNA_POLYMERASE_II_PRE_TRANSCRIPTION_EVENTS	1.59916	0.0109826	0.109632
REACTOME_RHOD_GTPASE_CYCLE	-0.721571	0.895549	1	REACTOME_RHOD_GTPASE_CYCLE	1.40653	0.0621201	0.634531	REACTOME_RHOD_GTPASE_CYCLE	0.846915	0.70025	0.965327
REACTOME_RNA_POLYMERASE_II_PROMOTER_ESCAPE	-1.03123	0.410886	1	REACTOME_RNA_POLYMERASE_II_PROMOTER_ESCAPE	1.39427	0.0857979	0.636186	REACTOME_RNA_POLYMERASE_II_PROMOTER_ESCAPE	1.53737	0.0300798	0.15573
REACTOME_ECM_PROTEOGLYCANS	1.47527	0.0643673	0.504541	REACTOME_ECM_PROTEOGLYCANS	1.49675	0.0505415	0.636274	REACTOME_ECM_PROTEOGLYCANS	1.3025	0.143062	0.389396
WP_MITOCHONDRIAL_LONG_CHAIN_FATTY_ACID_BETAOXIDATION	1.1933	0.238095	0.810659	WP_MITOCHONDRIAL_LONG_CHAIN_FATTY_ACID_BETAOXIDATION	-1.19264	0.248452	0.638812	WP_MITOCHONDRIAL_LONG_CHAIN_FATTY_ACID_BETAOXIDATION	-1.35018	0.1301	0.200672
REACTOME_SIGNALING_BY_THE_B_CELL_RECEPTOR_BCR	-0.705843	0.951475	1	REACTOME_SIGNALING_BY_THE_B_CELL_RECEPTOR_BCR	-1.18811	0.157266	0.640054	REACTOME_SIGNALING_BY_THE_B_CELL_RECEPTOR_BCR	-1.88875	0	0.0242659
REACTOME_RMTS_METHYLATE_HISTONE_ARGININES	-1.11173	0.309839	0.998103	REACTOME_RMTS_METHYLATE_HISTONE_ARGININES	-1.18966	0.218197	0.641425	REACTOME_RMTS_METHYLATE_HISTONE_ARGININES	-1.24532	0.162584	0.279775
REACTOME_FORMATION_OF_TC_NER_PRE_INCISION_COMPLEX	-1.20021	0.205893	0.847097	REACTOME_FORMATION_OF_TC_NER_PRE_INCISION_COMPLEX	1.37364	0.0847181	0.645232	REACTOME_FORMATION_OF_TC_NER_PRE_INCISION_COMPLEX	1.39128	0.0730642	0.286274
BIOCARTA_TPO_PATHWAY	0.961394	0.497722	1	BIOCARTA_TPO_PATHWAY	-1.17977	0.242008	0.646923	BIOCARTA_TPO_PATHWAY	-1.4153	0.0893639	0.151383
REACTOME_RND1_GTPASE_CYCLE	0.735338	0.847807	1	REACTOME_RND1_GTPASE_CYCLE	-1.17497	0.223703	0.649171	REACTOME_RND1_GTPASE_CYCLE	-1.3522	0.0942111	0.199466
REACTOME_RHOF_GTPASE_CYCLE	-1.04285	0.383687	1	REACTOME_RHOF_GTPASE_CYCLE	1.50047	0.0400121	0.649732	REACTOME_RHOF_GTPASE_CYCLE	0.657283	0.929243	0.976916
REACTOME_PLASMA_LIPOPROTEIN_CLEARANCE	1.00095	0.451613	1	REACTOME_PLASMA_LIPOPROTEIN_CLEARANCE	-1.18061	0.244536	0.650306	REACTOME_PLASMA_LIPOPROTEIN_CLEARANCE	-1.51523	0.0488959	0.110831
REACTOME_EXTRA_NUCLEAR_ESTROGEN_SIGNALING	0.995191	0.445339	1	REACTOME_EXTRA_NUCLEAR_ESTROGEN_SIGNALING	-1.17644	0.201662	0.650716	REACTOME_EXTRA_NUCLEAR_ESTROGEN_SIGNALING	-1.45916	0.0383918	0.127995
REACTOME_RHOBTB_GTPASE_CYCLE	-0.626187	0.957052	1	REACTOME_RHOBTB_GTPASE_CYCLE	-1.18143	0.210917	0.653915	REACTOME_RHOBTB_GTPASE_CYCLE	-0.886818	0.644955	0.75679
BIOCARTA_EGF_PATHWAY	0.675786	0.891525	1	BIOCARTA_EGF_PATHWAY	-1.17096	0.243366	0.655279	BIOCARTA_EGF_PATHWAY	-1.76427	0.00602252	0.0377804
REACTOME_ENERGY_DEPENDENT_REGULATION_OF_MTOR_BY_LKB1_AMPK	-0.718807	0.867797	1	REACTOME_ENERGY_DEPENDENT_REGULATION_OF_MTOR_BY_LKB1_AMPK	-1.16866	0.23247	0.656168	REACTOME_ENERGY_DEPENDENT_REGULATION_OF_MTOR_BY_LKB1_AMPK	-1.62461	0.0147222	0.072744
REACTOME_TRANSMISSION_ACROSS_CHEMICAL_SYNAPSES	1.11761	0.198969	0.884736	REACTOME_TRANSMISSION_ACROSS_CHEMICAL_SYNAPSES	-1.15448	0.126837	0.66917	REACTOME_TRANSMISSION_ACROSS_CHEMICAL_SYNAPSES	-1.60898	0.000489956	0.0755775
REACTOME_NOREPINEPHRINE_NEUROTRANSMITTER_RELEASE_CYCLE	0.866862	0.6341	1	REACTOME_NOREPINEPHRINE_NEUROTRANSMITTER_RELEASE_CYCLE	-1.15981	0.26527	0.670474	REACTOME_NOREPINEPHRINE_NEUROTRANSMITTER_RELEASE_CYCLE	-1.64187	0.0246091	0.0658746
REACTOME_G_ALPHA_Q_SIGNALLING_EVENTS	-1.21571	0.146835	0.871071	REACTOME_G_ALPHA_Q_SIGNALLING_EVENTS	-1.15708	0.181676	0.672909	REACTOME_G_ALPHA_Q_SIGNALLING_EVENTS	-1.32003	0.051215	0.223906
REACTOME_SIGNALING_BY_EGFR	-0.867773	0.666787	1	REACTOME_SIGNALING_BY_EGFR	-1.15469	0.232464	0.674192	REACTOME_SIGNALING_BY_EGFR	-1.57523	0.016974	0.0872309
REACTOME_SIGNALING_BY_NTRK1_TRKA	1.13855	0.25046	0.880551	REACTOME_SIGNALING_BY_NTRK1_TRKA	-1.16028	0.217915	0.674973	REACTOME_SIGNALING_BY_NTRK1_TRKA	-1.3975	0.0479751	0.162816
BIOCARTA_CASPASE_PATHWAY	0.866829	0.632337	1	BIOCARTA_CASPASE_PATHWAY	1.35811	0.125061	0.677769	BIOCARTA_CASPASE_PATHWAY	0.812076	0.708036	0.989287
REACTOME_GLYCOSAMINOGLYCAN_METABOLISM	0.879811	0.659954	1	REACTOME_GLYCOSAMINOGLYCAN_METABOLISM	1.30582	0.121001	0.678869	REACTOME_GLYCOSAMINOGLYCAN_METABOLISM	1.04749	0.387597	0.78432
REACTOME_RHOH_GTPASE_CYCLE	-0.553785	0.985421	1	REACTOME_RHOH_GTPASE_CYCLE	1.35055	0.111698	0.681034	REACTOME_RHOH_GTPASE_CYCLE	-1.28657	0.134874	0.250345
REACTOME_NUCLEOTIDE_EXCISION_REPAIR	-1.54895	0.0122764	0.557529	REACTOME_NUCLEOTIDE_EXCISION_REPAIR	1.2883	0.11532	0.684251	REACTOME_NUCLEOTIDE_EXCISION_REPAIR	1.19315	0.191802	0.518705
REACTOME_CITRIC_ACID_CYCLE_TCA_CYCLE	1.8257	0.00564849	0.0973757	REACTOME_CITRIC_ACID_CYCLE_TCA_CYCLE	1.3598	0.114091	0.684786	REACTOME_CITRIC_ACID_CYCLE_TCA_CYCLE	-1.23579	0.181936	0.289785
REACTOME_AURKA_ACTIVATION_BY_TPX2	-0.544717	0.989218	1	REACTOME_AURKA_ACTIVATION_BY_TPX2	1.30684	0.132241	0.685349	REACTOME_AURKA_ACTIVATION_BY_TPX2	0.789073	0.780203	0.99584
BIOCARTA_MAPK_PATHWAY	-1.32294	0.0967569	0.838056	BIOCARTA_MAPK_PATHWAY	1.29159	0.12073	0.691186	BIOCARTA_MAPK_PATHWAY	0.774956	0.828951	1
REACTOME_HEPARAN_SULFATE_HEPARIN_HS_GAG_METABOLISM	1.38326	0.0920393	0.641652	REACTOME_HEPARAN_SULFATE_HEPARIN_HS_GAG_METABOLISM	1.29376	0.153057	0.693007	REACTOME_HEPARAN_SULFATE_HEPARIN_HS_GAG_METABOLISM	0.967291	0.502973	0.885382
REACTOME_ROLE_OF_PHOSPHOLIPIDS_IN_PHAGOCYTOSIS	0.668672	0.890318	1	REACTOME_ROLE_OF_PHOSPHOLIPIDS_IN_PHAGOCYTOSIS	1.35089	0.129425	0.693052	REACTOME_ROLE_OF_PHOSPHOLIPIDS_IN_PHAGOCYTOSIS	-1.70053	0.0162623	0.0529561
REACTOME_REGULATION_OF_TNFR1_SIGNALING	0.898438	0.612918	1	REACTOME_REGULATION_OF_TNFR1_SIGNALING	1.28848	0.149485	0.69308	REACTOME_REGULATION_OF_TNFR1_SIGNALING	1.0259	0.422741	0.814471
REACTOME_CHONDROITIN_SULFATE_DERMATAN_SULFATE_METABOLISM	-1.1201	0.308153	0.992773	REACTOME_CHONDROITIN_SULFATE_DERMATAN_SULFATE_METABOLISM	1.30757	0.142568	0.693124	REACTOME_CHONDROITIN_SULFATE_DERMATAN_SULFATE_METABOLISM	0.890995	0.620356	0.970327
REACTOME_ESTROGEN_DEPENDENT_GENE_EXPRESSION	-1.01953	0.425474	1	REACTOME_ESTROGEN_DEPENDENT_GENE_EXPRESSION	1.32162	0.120502	0.695359	REACTOME_ESTROGEN_DEPENDENT_GENE_EXPRESSION	1.40435	0.0711253	0.281732
REACTOME_GPCR_LIGAND_BINDING	-1.36378	0.045586	0.769599	REACTOME_GPCR_LIGAND_BINDING	1.34026	0.0652889	0.695684	REACTOME_GPCR_LIGAND_BINDING	1.27446	0.0988466	0.420404
REACTOME_SIGNALING_BY_FGFR4	0.928183	0.554164	1	REACTOME_SIGNALING_BY_FGFR4	-1.14074	0.273397	0.698983	REACTOME_SIGNALING_BY_FGFR4	-1.40508	0.0856836	0.157424
WP_FATTY_ACID_BIOSYNTHESIS	-0.920223	0.566851	1	WP_FATTY_ACID_BIOSYNTHESIS	-1.13686	0.281675	0.69924	WP_FATTY_ACID_BIOSYNTHESIS	-1.43213	0.075586	0.143079
REACTOME_TRANSCRIPTIONAL_ACTIVITY_OF_SMAD2_SMAD3_SMAD4_HETEROTRIMER	0.575216	0.964064	1	REACTOME_TRANSCRIPTIONAL_ACTIVITY_OF_SMAD2_SMAD3_SMAD4_HETEROTRIMER	1.34257	0.127643	0.699446	REACTOME_TRANSCRIPTIONAL_ACTIVITY_OF_SMAD2_SMAD3_SMAD4_HETEROTRIMER	1.03335	0.42352	0.805767
REACTOME_SYNTHESIS_OF_IP3_AND_IP4_IN_THE_CYTOSOL	-0.964349	0.503517	1	REACTOME_SYNTHESIS_OF_IP3_AND_IP4_IN_THE_CYTOSOL	-1.13119	0.291014	0.699539	REACTOME_SYNTHESIS_OF_IP3_AND_IP4_IN_THE_CYTOSOL	-1.66164	0.0161746	0.0605693
REACTOME_METABOLISM_OF_STEROIDS	1.29483	0.100966	0.757247	REACTOME_METABOLISM_OF_STEROIDS	1.27885	0.121951	0.699992	REACTOME_METABOLISM_OF_STEROIDS	1.33051	0.0867722	0.355311
REACTOME_RAC3_GTPASE_CYCLE	-0.891652	0.65552	1	REACTOME_RAC3_GTPASE_CYCLE	1.32345	0.0920134	0.70011	REACTOME_RAC3_GTPASE_CYCLE	0.684817	0.946111	0.975687
REACTOME_NOD1_2_SIGNALING_PATHWAY	-0.752647	0.806167	1	REACTOME_NOD1_2_SIGNALING_PATHWAY	1.31734	0.143697	0.700244	REACTOME_NOD1_2_SIGNALING_PATHWAY	0.704179	0.856612	0.996121
REACTOME_CLEC7A_DECTIN_1_SIGNALING	0.683828	0.972619	1	REACTOME_CLEC7A_DECTIN_1_SIGNALING	-1.14207	0.213145	0.700666	REACTOME_CLEC7A_DECTIN_1_SIGNALING	-1.87473	0	0.0254371
REACTOME_RHOC_GTPASE_CYCLE	-1.31868	0.0898797	0.839222	REACTOME_RHOC_GTPASE_CYCLE	1.31413	0.109676	0.701156	REACTOME_RHOC_GTPASE_CYCLE	-0.913859	0.622715	0.712326
REACTOME_TP53_REGULATES_TRANSCRIPTION_OF_DNA_REPAIR_GENES	-1.201	0.218841	0.854245	REACTOME_TP53_REGULATES_TRANSCRIPTION_OF_DNA_REPAIR_GENES	1.30806	0.132569	0.702048	REACTOME_TP53_REGULATES_TRANSCRIPTION_OF_DNA_REPAIR_GENES	1.5024	0.0341788	0.1895
REACTOME_INTERLEUKIN_2_FAMILY_SIGNALING	-0.498428	0.983117	1	REACTOME_INTERLEUKIN_2_FAMILY_SIGNALING	1.29378	0.160116	0.702976	REACTOME_INTERLEUKIN_2_FAMILY_SIGNALING	-0.795001	0.74466	0.870649
REACTOME_ARACHIDONIC_ACID_METABOLISM	1.21671	0.206866	0.791341	REACTOME_ARACHIDONIC_ACID_METABOLISM	-1.13744	0.279596	0.703117	REACTOME_ARACHIDONIC_ACID_METABOLISM	-0.995086	0.455755	0.587379
REACTOME_METABOLISM_OF_NUCLEOTIDES	0.770193	0.877809	1	REACTOME_METABOLISM_OF_NUCLEOTIDES	-1.13182	0.23513	0.703214	REACTOME_METABOLISM_OF_NUCLEOTIDES	-1.203	0.151218	0.318984
REACTOME_OPIOID_SIGNALLING	1.03408	0.390542	1	REACTOME_OPIOID_SIGNALLING	-1.13311	0.227593	0.704938	REACTOME_OPIOID_SIGNALLING	-1.85573	0.000321647	0.0281458
REACTOME_DUAL_INCISION_IN_TC_NER	-1.4727	0.0415312	0.610841	REACTOME_DUAL_INCISION_IN_TC_NER	1.2795	0.145144	0.707068	REACTOME_DUAL_INCISION_IN_TC_NER	1.44873	0.0543927	0.254295
REACTOME_FOXO_MEDIATED_TRANSCRIPTION	-0.814568	0.713511	1	REACTOME_FOXO_MEDIATED_TRANSCRIPTION	1.2953	0.165444	0.707705	REACTOME_FOXO_MEDIATED_TRANSCRIPTION	1.59443	0.0292579	0.111073
REACTOME_NUCLEAR_EVENTS_KINASE_AND_TRANSCRIPTION_FACTOR_ACTIVATION	0.736708	0.828166	1	REACTOME_NUCLEAR_EVENTS_KINASE_AND_TRANSCRIPTION_FACTOR_ACTIVATION	1.32448	0.132467	0.708075	REACTOME_NUCLEAR_EVENTS_KINASE_AND_TRANSCRIPTION_FACTOR_ACTIVATION	0.866931	0.647802	0.958781
BIOCARTA_VDR_PATHWAY	-0.844635	0.666237	1	BIOCARTA_VDR_PATHWAY	1.30875	0.154466	0.710594	BIOCARTA_VDR_PATHWAY	1.7118	0.00862209	0.0755498
WP_MRNA_PROCESSING	0.82932	0.957885	1	WP_MRNA_PROCESSING	-1.12514	0.113171	0.712458	WP_MRNA_PROCESSING	1.6802	0	0.0839099
REACTOME_DNA_DAMAGE_RECOGNITION_IN_GG_NER	-1.30419	0.144744	0.835304	REACTOME_DNA_DAMAGE_RECOGNITION_IN_GG_NER	1.32531	0.132958	0.717136	REACTOME_DNA_DAMAGE_RECOGNITION_IN_GG_NER	-1.01336	0.427109	0.565671
REACTOME_LYSOSOME_VESICLE_BIOGENESIS	0.826935	0.719828	1	REACTOME_LYSOSOME_VESICLE_BIOGENESIS	1.2706	0.164483	0.721085	REACTOME_LYSOSOME_VESICLE_BIOGENESIS	1.13429	0.287127	0.620745
REACTOME_FORMATION_OF_RNA_POL_II_ELONGATION_COMPLEX	-1.24334	0.163133	0.865481	REACTOME_FORMATION_OF_RNA_POL_II_ELONGATION_COMPLEX	1.32747	0.11237	0.721266	REACTOME_FORMATION_OF_RNA_POL_II_ELONGATION_COMPLEX	1.57409	0.0157256	0.121738
REACTOME_TRANSPORT_OF_BILE_SALTS_AND_ORGANIC_ACIDS_METAL_IONS_AND_AMINE_COMPOUNDS	-1.33994	0.0982304	0.79856	REACTOME_TRANSPORT_OF_BILE_SALTS_AND_ORGANIC_ACIDS_METAL_IONS_AND_AMINE_COMPOUNDS	1.3299	0.110153	0.724232	REACTOME_TRANSPORT_OF_BILE_SALTS_AND_ORGANIC_ACIDS_METAL_IONS_AND_AMINE_COMPOUNDS	1.15353	0.265132	0.58673
WP_DYSREGULATED_MIRNA_TARGETING_IN_INSULINPI3KAKT_SIGNALING	0.677708	0.890776	1	WP_DYSREGULATED_MIRNA_TARGETING_IN_INSULINPI3KAKT_SIGNALING	1.24383	0.193048	0.72918	WP_DYSREGULATED_MIRNA_TARGETING_IN_INSULINPI3KAKT_SIGNALING	0.727278	0.835811	1
REACTOME_GOLGI_ASSOCIATED_VESICLE_BIOGENESIS	0.811301	0.781612	1	REACTOME_GOLGI_ASSOCIATED_VESICLE_BIOGENESIS	1.26548	0.147692	0.730525	REACTOME_GOLGI_ASSOCIATED_VESICLE_BIOGENESIS	1.01895	0.430665	0.821702
REACTOME_PEPTIDE_LIGAND_BINDING_RECEPTORS	-1.09582	0.320467	1	REACTOME_PEPTIDE_LIGAND_BINDING_RECEPTORS	1.25384	0.166891	0.736519	REACTOME_PEPTIDE_LIGAND_BINDING_RECEPTORS	1.61435	0.0118069	0.101943
WP_ENDOCHONDRAL_OSSIFICATION	0.72484	0.850022	1	WP_ENDOCHONDRAL_OSSIFICATION	1.24408	0.194946	0.736862	WP_ENDOCHONDRAL_OSSIFICATION	1.09327	0.347317	0.704202
REACTOME_INTRAFLAGELLAR_TRANSPORT	-1.19697	0.20584	0.849784	REACTOME_INTRAFLAGELLAR_TRANSPORT	1.25095	0.161571	0.738147	REACTOME_INTRAFLAGELLAR_TRANSPORT	-0.994659	0.458022	0.586655
BIOCARTA_MITOCHONDRIA_PATHWAY	1.0967	0.332335	0.907708	BIOCARTA_MITOCHONDRIA_PATHWAY	1.25558	0.195298	0.739194	BIOCARTA_MITOCHONDRIA_PATHWAY	0.69864	0.851729	0.979698
WP_GLYCEROLIPIDS_AND_GLYCEROPHOSPHOLIPIDS	-0.809634	0.727122	1	WP_GLYCEROLIPIDS_AND_GLYCEROPHOSPHOLIPIDS	1.2454	0.209745	0.740813	WP_GLYCEROLIPIDS_AND_GLYCEROPHOSPHOLIPIDS	1.34736	0.124533	0.331426
REACTOME_ANTIGEN_PROCESSING_CROSS_PRESENTATION	0.807731	0.811237	1	REACTOME_ANTIGEN_PROCESSING_CROSS_PRESENTATION	1.23576	0.160517	0.741648	REACTOME_ANTIGEN_PROCESSING_CROSS_PRESENTATION	-1.12676	0.241595	0.408708
REACTOME_SIGNALING_BY_PDGF	0.814975	0.754679	1	REACTOME_SIGNALING_BY_PDGF	1.23745	0.185764	0.743924	REACTOME_SIGNALING_BY_PDGF	-0.752001	0.863218	0.910455
REACTOME_DUAL_INCISION_IN_GG_NER	-1.3754	0.106163	0.801903	REACTOME_DUAL_INCISION_IN_GG_NER	1.23016	0.2092	0.745085	REACTOME_DUAL_INCISION_IN_GG_NER	0.75723	0.79621	1
REACTOME_TRANS_GOLGI_NETWORK_VESICLE_BUDDING	0.652827	0.973516	1	REACTOME_TRANS_GOLGI_NETWORK_VESICLE_BUDDING	1.25584	0.144387	0.747579	REACTOME_TRANS_GOLGI_NETWORK_VESICLE_BUDDING	1.0196	0.432962	0.826282
REACTOME_CHROMATIN_MODIFYING_ENZYMES	-1.67487	0.00278503	0.454887	REACTOME_CHROMATIN_MODIFYING_ENZYMES	1.23177	0.148374	0.74764	REACTOME_CHROMATIN_MODIFYING_ENZYMES	1.39588	0.0443377	0.287397
BIOCARTA_CHEMICAL_PATHWAY	0.763777	0.777416	1	BIOCARTA_CHEMICAL_PATHWAY	1.25833	0.194987	0.747776	BIOCARTA_CHEMICAL_PATHWAY	0.430667	0.995346	0.998589
WP_ADIPOGENESIS_GENES	0.946319	0.536785	1	WP_ADIPOGENESIS_GENES	1.24543	0.170289	0.749611	WP_ADIPOGENESIS_GENES	0.861291	0.686465	0.966167
WP_FOLIC_ACID_NETWORK	1.15026	0.282189	0.870944	WP_FOLIC_ACID_NETWORK	1.22651	0.221059	0.750003	WP_FOLIC_ACID_NETWORK	0.957325	0.518562	0.906577
WP_IL6_SIGNALING_PATHWAY	0.702271	0.953207	1	WP_IL6_SIGNALING_PATHWAY	1.22296	0.163536	0.754667	WP_IL6_SIGNALING_PATHWAY	0.853302	0.720924	0.978591
REACTOME_TRANSCRIPTION_COUPLED_NUCLEOTIDE_EXCISION_REPAIR_TC_NER	-1.47623	0.0335498	0.621601	REACTOME_TRANSCRIPTION_COUPLED_NUCLEOTIDE_EXCISION_REPAIR_TC_NER	1.21516	0.189972	0.758315	REACTOME_TRANSCRIPTION_COUPLED_NUCLEOTIDE_EXCISION_REPAIR_TC_NER	1.31244	0.107075	0.388563
WP_FAS_PATHWAY_AND_STRESS_INDUCTION_OF_HSP_REGULATION	-1.20623	0.220293	0.843729	WP_FAS_PATHWAY_AND_STRESS_INDUCTION_OF_HSP_REGULATION	1.21733	0.209855	0.758537	WP_FAS_PATHWAY_AND_STRESS_INDUCTION_OF_HSP_REGULATION	-0.81567	0.744474	0.843182
WP_P53_SIGNALING	-1.37222	0.108239	0.772702	WP_P53_SIGNALING	1.19342	0.24443	0.759826	WP_P53_SIGNALING	-1.01891	0.420078	0.560298
REACTOME_NONSENSE_MEDIATED_DECAY_NMD	2.43242	0	0	REACTOME_NONSENSE_MEDIATED_DECAY_NMD	1.19527	0.178053	0.760719	REACTOME_NONSENSE_MEDIATED_DECAY_NMD	2.32756	0	0
WP_G13_SIGNALING_PATHWAY	-0.853359	0.687478	1	WP_G13_SIGNALING_PATHWAY	-1.10779	0.302271	0.76145	WP_G13_SIGNALING_PATHWAY	-1.84014	0.00112549	0.0294704
WP_GPCRS_CLASS_A_RHODOPSINLIKE	-1.54648	0.027938	0.534789	WP_GPCRS_CLASS_A_RHODOPSINLIKE	1.21853	0.203839	0.762361	WP_GPCRS_CLASS_A_RHODOPSINLIKE	0.977497	0.48912	0.875714
REACTOME_CYCLIN_D_ASSOCIATED_EVENTS_IN_G1	-0.865793	0.652726	1	REACTOME_CYCLIN_D_ASSOCIATED_EVENTS_IN_G1	1.18853	0.252815	0.762441	REACTOME_CYCLIN_D_ASSOCIATED_EVENTS_IN_G1	0.906866	0.588568	0.972934
WP_TYROBP_CAUSAL_NETWORK_IN_MICROGLIA	-1.37648	0.0965877	0.820426	WP_TYROBP_CAUSAL_NETWORK_IN_MICROGLIA	1.19047	0.247342	0.762841	WP_TYROBP_CAUSAL_NETWORK_IN_MICROGLIA	-1.04308	0.387131	0.521741
REACTOME_CARDIAC_CONDUCTION	0.709138	0.936095	1	REACTOME_CARDIAC_CONDUCTION	-1.1052	0.263049	0.763813	REACTOME_CARDIAC_CONDUCTION	-1.02388	0.404404	0.554417
WP_SIDS_SUSCEPTIBILITY_PATHWAYS	1.26105	0.180893	0.753036	WP_SIDS_SUSCEPTIBILITY_PATHWAYS	1.18602	0.247009	0.764039	WP_SIDS_SUSCEPTIBILITY_PATHWAYS	1.0677	0.376349	0.764876
REACTOME_CELL_EXTRACELLULAR_MATRIX_INTERACTIONS	-0.734178	0.810338	1	REACTOME_CELL_EXTRACELLULAR_MATRIX_INTERACTIONS	1.19635	0.2487	0.764309	REACTOME_CELL_EXTRACELLULAR_MATRIX_INTERACTIONS	0.768177	0.770324	1
WP_PRIMARY_FOCAL_SEGMENTAL_GLOMERULOSCLEROSIS_FSGS	0.848592	0.715111	1	WP_PRIMARY_FOCAL_SEGMENTAL_GLOMERULOSCLEROSIS_FSGS	1.15438	0.249928	0.766109	WP_PRIMARY_FOCAL_SEGMENTAL_GLOMERULOSCLEROSIS_FSGS	0.534681	0.995178	0.991884
WP_WNT_SIGNALING_PATHWAY_AND_PLURIPOTENCY	-0.944604	0.538077	1	WP_WNT_SIGNALING_PATHWAY_AND_PLURIPOTENCY	1.15034	0.259805	0.767245	WP_WNT_SIGNALING_PATHWAY_AND_PLURIPOTENCY	0.63417	0.960831	0.975588
REACTOME_CYTOKINE_SIGNALING_IN_IMMUNE_SYSTEM	-1.00244	0.44	1	REACTOME_CYTOKINE_SIGNALING_IN_IMMUNE_SYSTEM	1.15585	0.178559	0.767427	REACTOME_CYTOKINE_SIGNALING_IN_IMMUNE_SYSTEM	-1.01191	0.410011	0.56554
REACTOME_MYOGENESIS	-0.584698	0.945503	1	REACTOME_MYOGENESIS	1.20817	0.241244	0.767904	REACTOME_MYOGENESIS	-0.885523	0.605243	0.75758
REACTOME_MRNA_CAPPING	-1.23696	0.200514	0.853916	REACTOME_MRNA_CAPPING	1.16489	0.271508	0.768891	REACTOME_MRNA_CAPPING	1.53482	0.0373757	0.154975
REACTOME_DNA_DAMAGE_BYPASS	-1.19433	0.229171	0.850158	REACTOME_DNA_DAMAGE_BYPASS	1.15136	0.281304	0.769909	REACTOME_DNA_DAMAGE_BYPASS	-1.05077	0.377257	0.51345
REACTOME_PROCESSING_OF_INTRONLESS_PRE_MRNAS	1.1484	0.272016	0.869343	REACTOME_PROCESSING_OF_INTRONLESS_PRE_MRNAS	1.15676	0.276	0.7707	REACTOME_PROCESSING_OF_INTRONLESS_PRE_MRNAS	1.85665	0.00130336	0.0282101
BIOCARTA_AGR_PATHWAY	-1.00022	0.453521	1	BIOCARTA_AGR_PATHWAY	1.13301	0.299624	0.771005	BIOCARTA_AGR_PATHWAY	0.847941	0.677755	0.973912
REACTOME_ERK_MAPK_TARGETS	0.91143	0.574919	1	REACTOME_ERK_MAPK_TARGETS	1.20939	0.232671	0.771396	REACTOME_ERK_MAPK_TARGETS	0.571222	0.95672	0.994917
REACTOME_SYNTHESIS_OF_PC	1.24009	0.1958	0.776343	REACTOME_SYNTHESIS_OF_PC	1.19639	0.236613	0.771644	REACTOME_SYNTHESIS_OF_PC	0.759649	0.790148	1
REACTOME_TRANSLATION	2.19859	0	0.000758027	REACTOME_TRANSLATION	1.13412	0.211078	0.773134	REACTOME_TRANSLATION	1.81131	0	0.037521
REACTOME_GAMMA_CARBOXYLATION_HYPUSINE_FORMATION_AND_ARYLSULFATASE_ACTIVATION	0.997411	0.443518	1	REACTOME_GAMMA_CARBOXYLATION_HYPUSINE_FORMATION_AND_ARYLSULFATASE_ACTIVATION	1.16142	0.274366	0.774163	REACTOME_GAMMA_CARBOXYLATION_HYPUSINE_FORMATION_AND_ARYLSULFATASE_ACTIVATION	0.897177	0.594928	0.979173
REACTOME_CHOLESTEROL_BIOSYNTHESIS	1.47046	0.0647059	0.504456	REACTOME_CHOLESTEROL_BIOSYNTHESIS	1.20206	0.236074	0.774362	REACTOME_CHOLESTEROL_BIOSYNTHESIS	1.79744	0.00368531	0.0407527
REACTOME_MET_PROMOTES_CELL_MOTILITY	0.552062	0.972187	1	REACTOME_MET_PROMOTES_CELL_MOTILITY	1.1649	0.269517	0.775396	REACTOME_MET_PROMOTES_CELL_MOTILITY	-0.821284	0.713875	0.843575
BIOCARTA_DEATH_PATHWAY	0.996131	0.452142	1	BIOCARTA_DEATH_PATHWAY	1.16681	0.268749	0.775541	BIOCARTA_DEATH_PATHWAY	-0.762625	0.803507	0.898723
REACTOME_RAC2_GTPASE_CYCLE	-1.06084	0.358859	1	REACTOME_RAC2_GTPASE_CYCLE	1.14229	0.253408	0.775703	REACTOME_RAC2_GTPASE_CYCLE	0.720551	0.917091	1
REACTOME_AMINO_ACID_TRANSPORT_ACROSS_THE_PLASMA_MEMBRANE	-0.677953	0.894796	1	REACTOME_AMINO_ACID_TRANSPORT_ACROSS_THE_PLASMA_MEMBRANE	1.15688	0.280625	0.776682	REACTOME_AMINO_ACID_TRANSPORT_ACROSS_THE_PLASMA_MEMBRANE	0.979931	0.486387	0.87531
REACTOME_TGF_BETA_RECEPTOR_SIGNALING_ACTIVATES_SMADS	-0.662943	0.8995	1	REACTOME_TGF_BETA_RECEPTOR_SIGNALING_ACTIVATES_SMADS	1.19925	0.239082	0.776706	REACTOME_TGF_BETA_RECEPTOR_SIGNALING_ACTIVATES_SMADS	0.713344	0.838455	0.999582
WP_FOCAL_ADHESION	-0.890404	0.68697	1	WP_FOCAL_ADHESION	1.1344	0.240139	0.778022	WP_FOCAL_ADHESION	-1.16873	0.145599	0.356819
REACTOME_DRUG_ADME	1.0153	0.419837	1	REACTOME_DRUG_ADME	1.19662	0.209171	0.778433	REACTOME_DRUG_ADME	-1.0166	0.412371	0.562015
REACTOME_DARPP_32_EVENTS	1.1462	0.282562	0.860536	REACTOME_DARPP_32_EVENTS	1.13962	0.302182	0.778565	REACTOME_DARPP_32_EVENTS	-1.05316	0.385825	0.510005
REACTOME_CELL_DEATH_SIGNALLING_VIA_NRAGE_NRIF_AND_NADE	-0.923218	0.579021	1	REACTOME_CELL_DEATH_SIGNALLING_VIA_NRAGE_NRIF_AND_NADE	1.16776	0.231624	0.779039	REACTOME_CELL_DEATH_SIGNALLING_VIA_NRAGE_NRIF_AND_NADE	-0.917578	0.599566	0.709675
REACTOME_DNA_DOUBLE_STRAND_BREAK_REPAIR	-1.67355	0.00864197	0.403302	REACTOME_DNA_DOUBLE_STRAND_BREAK_REPAIR	1.17948	0.22152	0.779692	REACTOME_DNA_DOUBLE_STRAND_BREAK_REPAIR	-0.928303	0.583897	0.695333
REACTOME_SIGNALING_BY_INTERLEUKINS	-1.08059	0.29218	1	REACTOME_SIGNALING_BY_INTERLEUKINS	1.14283	0.213154	0.779957	REACTOME_SIGNALING_BY_INTERLEUKINS	-1.11487	0.195933	0.423386
REACTOME_PROCESSING_OF_CAPPED_INTRONLESS_PRE_MRNA	1.31382	0.133703	0.713082	REACTOME_PROCESSING_OF_CAPPED_INTRONLESS_PRE_MRNA	1.13551	0.293419	0.78026	REACTOME_PROCESSING_OF_CAPPED_INTRONLESS_PRE_MRNA	1.79216	0.00237756	0.0400625
REACTOME_ANCHORING_OF_THE_BASAL_BODY_TO_THE_PLASMA_MEMBRANE	-0.914575	0.607029	1	REACTOME_ANCHORING_OF_THE_BASAL_BODY_TO_THE_PLASMA_MEMBRANE	1.20249	0.200665	0.780654	REACTOME_ANCHORING_OF_THE_BASAL_BODY_TO_THE_PLASMA_MEMBRANE	1.31163	0.106065	0.385027
REACTOME_SEROTONIN_NEUROTRANSMITTER_RELEASE_CYCLE	0.607298	0.941034	1	REACTOME_SEROTONIN_NEUROTRANSMITTER_RELEASE_CYCLE	-1.09073	0.331738	0.78112	REACTOME_SEROTONIN_NEUROTRANSMITTER_RELEASE_CYCLE	-1.60638	0.0277136	0.0756218
REACTOME_BILE_ACID_AND_BILE_SALT_METABOLISM	1.36399	0.113932	0.666119	REACTOME_BILE_ACID_AND_BILE_SALT_METABOLISM	1.1572	0.279342	0.782049	REACTOME_BILE_ACID_AND_BILE_SALT_METABOLISM	0.879976	0.62914	0.967698
WP_PPAR_SIGNALING_PATHWAY	1.6873	0.0116959	0.16634	WP_PPAR_SIGNALING_PATHWAY	1.14396	0.268174	0.78224	WP_PPAR_SIGNALING_PATHWAY	0.986777	0.477849	0.875082
REACTOME_APOPTOTIC_EXECUTION_PHASE	-0.965462	0.50831	1	REACTOME_APOPTOTIC_EXECUTION_PHASE	1.16843	0.251041	0.783519	REACTOME_APOPTOTIC_EXECUTION_PHASE	-0.841444	0.728465	0.817334
REACTOME_TNF_SIGNALING	0.847164	0.714576	1	REACTOME_TNF_SIGNALING	1.17237	0.228559	0.783543	REACTOME_TNF_SIGNALING	0.970728	0.504649	0.888411
REACTOME_CLASS_I_MHC_MEDIATED_ANTIGEN_PROCESSING_PRESENTATION	-0.911385	0.691683	1	REACTOME_CLASS_I_MHC_MEDIATED_ANTIGEN_PROCESSING_PRESENTATION	1.17021	0.155433	0.784134	REACTOME_CLASS_I_MHC_MEDIATED_ANTIGEN_PROCESSING_PRESENTATION	0.868515	0.784258	0.96065
REACTOME_SIALIC_ACID_METABOLISM	1.18004	0.254581	0.831697	REACTOME_SIALIC_ACID_METABOLISM	1.13572	0.303678	0.78554	REACTOME_SIALIC_ACID_METABOLISM	0.826449	0.692107	0.976499
WP_SPHINGOLIPID_METABOLISM_OVERVIEW	1.61796	0.0268817	0.225063	WP_SPHINGOLIPID_METABOLISM_OVERVIEW	-1.0911	0.340179	0.785743	WP_SPHINGOLIPID_METABOLISM_OVERVIEW	1.68482	0.0113562	0.0886992
REACTOME_MYD88_INDEPENDENT_TLR4_CASCADE	-1.08996	0.307868	1	REACTOME_MYD88_INDEPENDENT_TLR4_CASCADE	1.12631	0.277731	0.786949	REACTOME_MYD88_INDEPENDENT_TLR4_CASCADE	0.656644	0.963318	0.973237
REACTOME_BASE_EXCISION_REPAIR	-1.46728	0.0660655	0.608694	REACTOME_BASE_EXCISION_REPAIR	1.17332	0.266775	0.787293	REACTOME_BASE_EXCISION_REPAIR	0.701088	0.855167	0.990372
REACTOME_INTRA_GOLGI_AND_RETROGRADE_GOLGI_TO_ER_TRAFFIC	1.11902	0.210023	0.887324	REACTOME_INTRA_GOLGI_AND_RETROGRADE_GOLGI_TO_ER_TRAFFIC	1.17498	0.186549	0.788533	REACTOME_INTRA_GOLGI_AND_RETROGRADE_GOLGI_TO_ER_TRAFFIC	1.03417	0.399511	0.80991
REACTOME_NEUROTRANSMITTER_RECEPTORS_AND_POSTSYNAPTIC_SIGNAL_TRANSMISSION	1.19584	0.14598	0.810632	REACTOME_NEUROTRANSMITTER_RECEPTORS_AND_POSTSYNAPTIC_SIGNAL_TRANSMISSION	-1.09569	0.254258	0.788815	REACTOME_NEUROTRANSMITTER_RECEPTORS_AND_POSTSYNAPTIC_SIGNAL_TRANSMISSION	-1.42746	0.0135189	0.143895
REACTOME_A_TETRASACCHARIDE_LINKER_SEQUENCE_IS_REQUIRED_FOR_GAG_SYNTHESIS	0.58303	0.95656	1	REACTOME_A_TETRASACCHARIDE_LINKER_SEQUENCE_IS_REQUIRED_FOR_GAG_SYNTHESIS	1.12353	0.312861	0.790354	REACTOME_A_TETRASACCHARIDE_LINKER_SEQUENCE_IS_REQUIRED_FOR_GAG_SYNTHESIS	0.846002	0.664325	0.961933
REACTOME_METABOLISM_OF_PORPHYRINS	1.25711	0.191737	0.736206	REACTOME_METABOLISM_OF_PORPHYRINS	1.12163	0.323057	0.790763	REACTOME_METABOLISM_OF_PORPHYRINS	0.923839	0.567536	0.959675
WP_SPHINGOLIPID_METABOLISM_INTEGRATED_PATHWAY	1.6176	0.0292208	0.218299	WP_SPHINGOLIPID_METABOLISM_INTEGRATED_PATHWAY	-1.09135	0.330977	0.790874	WP_SPHINGOLIPID_METABOLISM_INTEGRATED_PATHWAY	1.68208	0.0144518	0.086526
REACTOME_MAJOR_PATHWAY_OF_RRNA_PROCESSING_IN_THE_NUCLEOLUS_AND_CYTOSOL	1.76082	0.000505306	0.119708	REACTOME_MAJOR_PATHWAY_OF_RRNA_PROCESSING_IN_THE_NUCLEOLUS_AND_CYTOSOL	1.1176	0.259011	0.792479	REACTOME_MAJOR_PATHWAY_OF_RRNA_PROCESSING_IN_THE_NUCLEOLUS_AND_CYTOSOL	2.14285	0	0.000182686
REACTOME_NUCLEOTIDE_BINDING_DOMAIN_LEUCINE_RICH_REPEAT_CONTAINING_RECEPTOR_NLR_SIGNALING_PATHWAYS	0.705401	0.880157	1	REACTOME_NUCLEOTIDE_BINDING_DOMAIN_LEUCINE_RICH_REPEAT_CONTAINING_RECEPTOR_NLR_SIGNALING_PATHWAYS	1.1157	0.312169	0.79284	REACTOME_NUCLEOTIDE_BINDING_DOMAIN_LEUCINE_RICH_REPEAT_CONTAINING_RECEPTOR_NLR_SIGNALING_PATHWAYS	-0.697582	0.897547	0.93881
WP_NEURAL_CREST_DIFFERENTIATION	-1.57099	0.0264253	0.582001	WP_NEURAL_CREST_DIFFERENTIATION	-1.0924	0.318346	0.793453	WP_NEURAL_CREST_DIFFERENTIATION	-0.815465	0.771701	0.841556
BIOCARTA_FAS_PATHWAY	-1.09824	0.333457	1	BIOCARTA_FAS_PATHWAY	1.1187	0.315298	0.794564	BIOCARTA_FAS_PATHWAY	-1.10435	0.315584	0.438704
REACTOME_BRANCHED_CHAIN_AMINO_ACID_CATABOLISM	-0.981415	0.479554	1	REACTOME_BRANCHED_CHAIN_AMINO_ACID_CATABOLISM	-1.07918	0.3482	0.801251	REACTOME_BRANCHED_CHAIN_AMINO_ACID_CATABOLISM	-1.22322	0.199948	0.299738
WP_SPINAL_CORD_INJURY	-1.3047	0.115529	0.849956	WP_SPINAL_CORD_INJURY	-1.06419	0.340537	0.804743	WP_SPINAL_CORD_INJURY	-1.21455	0.160524	0.307766
REACTOME_SIGNALING_BY_ERBB4	0.86742	0.629118	1	REACTOME_SIGNALING_BY_ERBB4	-1.07922	0.338298	0.807004	REACTOME_SIGNALING_BY_ERBB4	-1.28736	0.153289	0.250432
REACTOME_RAS_PROCESSING	1.37632	0.117088	0.651313	REACTOME_RAS_PROCESSING	-1.06496	0.362909	0.807803	REACTOME_RAS_PROCESSING	-1.33243	0.129132	0.211652
REACTOME_DOWNSTREAM_SIGNAL_TRANSDUCTION	0.746909	0.817712	1	REACTOME_DOWNSTREAM_SIGNAL_TRANSDUCTION	-1.08078	0.339504	0.807901	REACTOME_DOWNSTREAM_SIGNAL_TRANSDUCTION	-1.71553	0.0102096	0.0494096
REACTOME_VEGFR2_MEDIATED_VASCULAR_PERMEABILITY	1.21791	0.201771	0.806597	REACTOME_VEGFR2_MEDIATED_VASCULAR_PERMEABILITY	-1.07006	0.350371	0.80791	REACTOME_VEGFR2_MEDIATED_VASCULAR_PERMEABILITY	-1.48577	0.0534991	0.117461
REACTOME_MTORC1_MEDIATED_SIGNALLING	-0.939087	0.540939	1	REACTOME_MTORC1_MEDIATED_SIGNALLING	-1.0735	0.344294	0.808183	REACTOME_MTORC1_MEDIATED_SIGNALLING	-1.61613	0.0216874	0.074524
REACTOME_PLATELET_HOMEOSTASIS	-0.88274	0.663407	1	REACTOME_PLATELET_HOMEOSTASIS	-1.06789	0.331885	0.809427	REACTOME_PLATELET_HOMEOSTASIS	-1.34326	0.0714511	0.204312
REACTOME_EFFECTS_OF_PIP2_HYDROLYSIS	-0.837718	0.687165	1	REACTOME_EFFECTS_OF_PIP2_HYDROLYSIS	-1.07132	0.354822	0.809522	REACTOME_EFFECTS_OF_PIP2_HYDROLYSIS	-1.51774	0.0451918	0.109874
BIOCARTA_TOLL_PATHWAY	-1.24788	0.197775	0.872559	BIOCARTA_TOLL_PATHWAY	-1.06549	0.374046	0.811709	BIOCARTA_TOLL_PATHWAY	0.784748	0.749041	0.998379
REACTOME_HATS_ACETYLATE_HISTONES	-0.924238	0.558538	1	REACTOME_HATS_ACETYLATE_HISTONES	-1.0736	0.352743	0.813722	REACTOME_HATS_ACETYLATE_HISTONES	0.935814	0.548245	0.940096
REACTOME_PYRUVATE_METABOLISM_AND_CITRIC_ACID_TCA_CYCLE	1.59015	0.0153038	0.256602	REACTOME_PYRUVATE_METABOLISM_AND_CITRIC_ACID_TCA_CYCLE	1.10561	0.312047	0.814205	REACTOME_PYRUVATE_METABOLISM_AND_CITRIC_ACID_TCA_CYCLE	-1.58021	0.0143027	0.0862698
REACTOME_REGULATION_OF_TP53_ACTIVITY_THROUGH_ACETYLATION	0.665462	0.920248	1	REACTOME_REGULATION_OF_TP53_ACTIVITY_THROUGH_ACETYLATION	-1.05907	0.36227	0.815872	REACTOME_REGULATION_OF_TP53_ACTIVITY_THROUGH_ACETYLATION	1.02951	0.423462	0.810503
REACTOME_BUTYRATE_RESPONSE_FACTOR_1_BRF1_BINDS_AND_DESTABILIZES_MRNA	1.27757	0.176534	0.771937	REACTOME_BUTYRATE_RESPONSE_FACTOR_1_BRF1_BINDS_AND_DESTABILIZES_MRNA	1.10679	0.337664	0.816065	REACTOME_BUTYRATE_RESPONSE_FACTOR_1_BRF1_BINDS_AND_DESTABILIZES_MRNA	1.6344	0.0171382	0.0938209
REACTOME_PROCESSING_OF_DNA_DOUBLE_STRAND_BREAK_ENDS	-1.74344	0.00744186	0.411722	REACTOME_PROCESSING_OF_DNA_DOUBLE_STRAND_BREAK_ENDS	-1.04874	0.379032	0.822112	REACTOME_PROCESSING_OF_DNA_DOUBLE_STRAND_BREAK_ENDS	-0.995578	0.447717	0.587929
BIOCARTA_BIOPEPTIDES_PATHWAY	1.33273	0.124695	0.695955	BIOCARTA_BIOPEPTIDES_PATHWAY	-1.04908	0.375556	0.826469	BIOCARTA_BIOPEPTIDES_PATHWAY	-1.42073	0.0724716	0.148162
REACTOME_TP53_REGULATES_TRANSCRIPTION_OF_CELL_CYCLE_GENES	-1.17106	0.270225	0.89327	REACTOME_TP53_REGULATES_TRANSCRIPTION_OF_CELL_CYCLE_GENES	1.09949	0.350799	0.828519	REACTOME_TP53_REGULATES_TRANSCRIPTION_OF_CELL_CYCLE_GENES	-0.661225	0.903452	0.958092
REACTOME_TNFR1_INDUCED_NFKAPPAB_SIGNALING_PATHWAY	-0.540203	0.981908	1	REACTOME_TNFR1_INDUCED_NFKAPPAB_SIGNALING_PATHWAY	1.08897	0.341104	0.828993	REACTOME_TNFR1_INDUCED_NFKAPPAB_SIGNALING_PATHWAY	0.655952	0.909621	0.969631
REACTOME_G2_M_DNA_DAMAGE_CHECKPOINT	-1.75926	0.00417574	0.468303	REACTOME_G2_M_DNA_DAMAGE_CHECKPOINT	-1.0494	0.375561	0.83104	REACTOME_G2_M_DNA_DAMAGE_CHECKPOINT	-1.01798	0.413031	0.560677
WP_PARKINSONS_DISEASE	-0.919302	0.576774	1	WP_PARKINSONS_DISEASE	1.08935	0.35612	0.833314	WP_PARKINSONS_DISEASE	-1.08707	0.33175	0.463141
REACTOME_RNA_POLYMERASE_II_TRANSCRIBES_SNRNA_GENES	-1.67673	0.00762952	0.522329	REACTOME_RNA_POLYMERASE_II_TRANSCRIBES_SNRNA_GENES	1.09618	0.314178	0.83356	REACTOME_RNA_POLYMERASE_II_TRANSCRIBES_SNRNA_GENES	1.07966	0.345208	0.736845
REACTOME_RAP1_SIGNALLING	-0.830594	0.684298	1	REACTOME_RAP1_SIGNALLING	1.09059	0.353098	0.834824	REACTOME_RAP1_SIGNALLING	-1.44689	0.0814399	0.133243
REACTOME_REGULATION_OF_APC_C_ACTIVATORS_BETWEEN_G1_S_AND_EARLY_ANAPHASE	-0.903222	0.584888	1	REACTOME_REGULATION_OF_APC_C_ACTIVATORS_BETWEEN_G1_S_AND_EARLY_ANAPHASE	-1.0497	0.386931	0.835593	REACTOME_REGULATION_OF_APC_C_ACTIVATORS_BETWEEN_G1_S_AND_EARLY_ANAPHASE	-1.10993	0.316812	0.429714
REACTOME_PCP_CE_PATHWAY	1.0536	0.351472	0.963622	REACTOME_PCP_CE_PATHWAY	-1.05018	0.346167	0.839564	REACTOME_PCP_CE_PATHWAY	-1.92088	0	0.0198414
REACTOME_NRAGE_SIGNALS_DEATH_THROUGH_JNK	-1.06785	0.354317	1	REACTOME_NRAGE_SIGNALS_DEATH_THROUGH_JNK	1.09062	0.328269	0.840406	REACTOME_NRAGE_SIGNALS_DEATH_THROUGH_JNK	-1.16434	0.224683	0.360168
REACTOME_INTERLEUKIN_17_SIGNALING	-1.36461	0.0773949	0.786247	REACTOME_INTERLEUKIN_17_SIGNALING	1.09147	0.335468	0.843367	REACTOME_INTERLEUKIN_17_SIGNALING	-0.708565	0.928316	0.932968
REACTOME_RUNX1_INTERACTS_WITH_CO_FACTORS_WHOSE_PRECISE_EFFECT_ON_RUNX1_TARGETS_IS_NOT_KNOWN	-1.42453	0.0748514	0.672641	REACTOME_RUNX1_INTERACTS_WITH_CO_FACTORS_WHOSE_PRECISE_EFFECT_ON_RUNX1_TARGETS_IS_NOT_KNOWN	1.07451	0.366419	0.859106	REACTOME_RUNX1_INTERACTS_WITH_CO_FACTORS_WHOSE_PRECISE_EFFECT_ON_RUNX1_TARGETS_IS_NOT_KNOWN	1.33696	0.126192	0.347235
REACTOME_ADAPTIVE_IMMUNE_SYSTEM	-0.664935	1	1	REACTOME_ADAPTIVE_IMMUNE_SYSTEM	1.07742	0.286228	0.860933	REACTOME_ADAPTIVE_IMMUNE_SYSTEM	-1.09089	0.144397	0.460055
REACTOME_REGULATION_OF_TP53_DEGRADATION	0.831373	0.686149	1	REACTOME_REGULATION_OF_TP53_DEGRADATION	1.06879	0.375459	0.861068	REACTOME_REGULATION_OF_TP53_DEGRADATION	-0.73332	0.838528	0.91374
REACTOME_BINDING_AND_UPTAKE_OF_LIGANDS_BY_SCAVENGER_RECEPTORS	1.31289	0.158933	0.704277	REACTOME_BINDING_AND_UPTAKE_OF_LIGANDS_BY_SCAVENGER_RECEPTORS	1.07558	0.370059	0.861298	REACTOME_BINDING_AND_UPTAKE_OF_LIGANDS_BY_SCAVENGER_RECEPTORS	1.1973	0.243072	0.513739
REACTOME_DDX58_IFIH1_MEDIATED_INDUCTION_OF_INTERFERON_ALPHA_BETA	0.845499	0.675136	1	REACTOME_DDX58_IFIH1_MEDIATED_INDUCTION_OF_INTERFERON_ALPHA_BETA	1.06967	0.370818	0.863763	REACTOME_DDX58_IFIH1_MEDIATED_INDUCTION_OF_INTERFERON_ALPHA_BETA	1.2158	0.21503	0.494834
WP_NOTCH_SIGNALING_PATHWAY	-1.11973	0.310069	0.984549	WP_NOTCH_SIGNALING_PATHWAY	1.07056	0.371752	0.866515	WP_NOTCH_SIGNALING_PATHWAY	0.895506	0.603488	0.971101
REACTOME_SPHINGOLIPID_DE_NOVO_BIOSYNTHESIS	1.68896	0.0185785	0.171061	REACTOME_SPHINGOLIPID_DE_NOVO_BIOSYNTHESIS	-1.03272	0.403265	0.869918	REACTOME_SPHINGOLIPID_DE_NOVO_BIOSYNTHESIS	1.6365	0.0207556	0.0953343
REACTOME_GLUCONEOGENESIS	0.706645	0.878478	1	REACTOME_GLUCONEOGENESIS	-1.02458	0.406993	0.874796	REACTOME_GLUCONEOGENESIS	-1.27604	0.150968	0.25733
REACTOME_RND3_GTPASE_CYCLE	1.20022	0.213466	0.803594	REACTOME_RND3_GTPASE_CYCLE	-1.01785	0.421068	0.875318	REACTOME_RND3_GTPASE_CYCLE	0.725217	0.851228	1
REACTOME_NEUROTRANSMITTER_RELEASE_CYCLE	0.671864	0.95693	1	REACTOME_NEUROTRANSMITTER_RELEASE_CYCLE	-1.02275	0.413625	0.875463	REACTOME_NEUROTRANSMITTER_RELEASE_CYCLE	-1.71296	0.0049398	0.0491468
REACTOME_MUSCLE_CONTRACTION	-0.927621	0.594425	1	REACTOME_MUSCLE_CONTRACTION	-1.01939	0.40625	0.875605	REACTOME_MUSCLE_CONTRACTION	-1.42857	0.0175372	0.144498
REACTOME_MTOR_SIGNALLING	-0.656289	0.943192	1	REACTOME_MTOR_SIGNALLING	-1.02011	0.416287	0.878713	REACTOME_MTOR_SIGNALLING	-1.51839	0.0290313	0.110158
REACTOME_CYTOPROTECTION_BY_HMOX1	0.784935	0.807435	1	REACTOME_CYTOPROTECTION_BY_HMOX1	-1.02497	0.414543	0.879177	REACTOME_CYTOPROTECTION_BY_HMOX1	0.931629	0.556875	0.945098
[truncated: 392 more rows]

## Sheet: cluster
* NbClust results. Method=ward.D2, distance=euclidean
		NES
cluster	ID	SYP MNK1	SYP MNK2	SYP DKO
[truncated: 75 more rows]

## Sheet: GSEA CC ribosomes
* GSEA mouse MSigDB canonical pathways: m5.go.cc.v2022.1.Mm.symbols
[truncated: 9 more rows]
