# Supplementary material for: Distinct roles for MNK1 and MNK2 in social and cognitive behavior through kinase-specific regulation of the synaptic proteome and phosphoproteome
Source: Mol Psychiatry. 2026 Feb 13;31(6):3446–61. doi: 10.1038/s41380-026-03483-w (PMC13190234; doi:10.1038/s41380-026-03483-w)
Supplement: Supplementary file 7 — Supplementary Table 6 [file 41380_2026_3483_MOESM7_ESM.xlsx]

## Sheet: TMT all phosphosites cortex
phosphosite CX	normalized protein expression CX																LogFC over WT CX			p-value / WT CX			adjusted p-value / WT CX
id	CX_WT	CX_WT	CX_WT	CX_WT	CX_MNK1KO	CX_MNK1KO	CX_MNK1KO	CX_MNK1KO	CX_MNK2KO	CX_MNK2KO	CX_MNK2KO	CX_MNK2KO	CX_MNKDKO	CX_MNKDKO	CX_MNKDKO	CX_MNKDKO	logFC.CX_MNK1KO.over.CX_WT	logFC.CX_MNK2KO.over.CX_WT	logFC.CX_MNKDKO.over.CX_WT	P.Value.CX_MNK1KO.over.CX_WT	P.Value.CX_MNK2KO.over.CX_WT	P.Value.CX_MNKDKO.over.CX_WT	adj.P.Val.CX_MNK1KO.over.CX_WT	adj.P.Val.CX_MNK2KO.over.CX_WT	adj.P.Val.CX_MNKDKO.over.CX_WT
0610010F05Rik_M0QWF3_S116s_1	1.25	-0.61	-0.47	1.76	1.12	-1.02	1.12	1.45	0.48	-0.02	1.29	0.35	-1.26	-1.61	-0.64	-0.9	0.185	0.0425	-1.585	0.79955	0.943631	0.0203927	1	0.999631	0.393617
0610011F06Rik_G5E8X1_S149s_1	-0.57	-0.3	-0.24	-0.91	-0.51	-0.44	-0.66	-0.22	-0.32	-0.42	-0.29	-0.17	0.67	0.19	0.02	0.19	0.0475	0.205	0.7725	0.860484	0.455674	0.0280703	1	0.999631	0.423977
1110002E22Rik_E0CYV9_S1338s_1	0.34	0.08	-0.72	-0.32	0.15	-0.25	0.14	-0.14	-0.06	0.25	-0.29	-0.28	-1.29	-1.66	-1.45	-0.61	0.13	0.06	-1.0975	0.67527	0.852349	0.0129585	1	0.999631	0.385092
1110037F02Rik_E9PZY8_S1628s_1	0.24	0.09	-0.04	-0.44	0.04	0.05	-0.35	-0.81	0.52	0.82	-0.17	-0.19	1	0.96	-0.48	-0.21	-0.23	0.2825	0.355	0.461068	0.412655	0.411353	1	0.999631	0.767937
1700021K19Rik_D3Z7B1_S137s_1	0.32	0.43	0.68	0.5	0.1	0.51	0.47	1.27	0.41	1.21	0.84	0.91	0.67	0.89	1.52	0.72	0.105	0.36	0.4675	0.736425	0.217359	0.150775	1	0.999631	0.623336
1700112E06Rik_E0CYG4_T63t_1	-0.22	-0.87	-0.28	-1.34	-0.21	-0.85	-0.53	-0.11	-1.34	-0.4	-0.23	-0.49	0.39	-0.43	-0.63	-1	0.2525	0.0625	0.26	0.471173	0.870449	0.533066	1	0.999631	0.827798
2010300C02Rik_E9Q3M9_S1094s_1	1.71	1.3	0.84	1.59	1.88	1.26	2.08	1.19	2.06	0.85	2.29	1.42	-0.13	1.05	-0.36	2.47	0.2425	0.295	-0.6025	0.473579	0.46057	0.33879	1	0.999631	0.731958
2010300C02Rik_E9Q3M9_S1123s_1	0.99	2.14	0.4	1.35	2.11	1.79	0.93	0.65	2.46	1.16	0.71	0.97	-0.23	1.56	0.15	1.33	0.15	0.105	-0.5175	0.753449	0.83514	0.344494	1	0.999631	0.734049
2010300C02Rik_E9Q3M9_S113s_1	1.82	0.21	-1.52	1.8	2.3	1.09	1.58	1.76	1.34	-0.11	0.93	-0.63	-4.29	1.37	0.45	0.17	1.105	-0.195	-1.1525	0.155186	0.808331	0.371189	1	0.999631	0.746338
2010300C02Rik_E9Q3M9_S162s_1	-0.44	-0.3	-0.72	-0.94	-0.97	-0.2	-0.73	-0.83	-0.85	-0.25	-1.32	-1.07	-0.31	-0.08	-0.74	-0.56	-0.0825	-0.2725	0.1775	0.777339	0.411045	0.562729	1	0.999631	0.841038
2010300C02Rik_E9Q3M9_S189s_1	0.39	-0.97	-0.8	-0.81	-0.93	-0.72	-0.78	-1.08	-0.96	0.06	-1.52	-1.11	-1.44	-0.48	-0.9	-0.98	-0.33	-0.335	-0.4025	0.360785	0.464307	0.32378	1	0.999631	0.724485
2010300C02Rik_E9Q3M9_S325s_1	0.28	0.32	-1.73	-0.87	0.49	0.28	-0.41	-0.32	0.53	0.73	-1.07	-1.3	0.83	-0.11	-0.66	-0.9	0.51	0.2225	0.29	0.326753	0.732801	0.616648	1	0.999631	0.861203
2010300C02Rik_E9Q3M9_S465s_1	-0.86	-1.61	-4.73	-2.88	-1.47	-1.82	-4.43	-4.65	-1.3	-0.18	-1.91	-3.27	-1.22	-1.69	-5.67	-4.46	-0.5725	0.855	-0.74	0.579301	0.365307	0.52777	1	0.999631	0.824665
2010300C02Rik_E9Q3M9_S47s_1	0.42	0.48	-0.68	0.71	0.4	0.48	0.87	0.87	0.55	0.39	0.57	0.15	-0.93	0.77	0.87	0.62	0.4225	0.1825	0.1	0.256576	0.613613	0.842242	1	0.999631	0.947766
2010300C02Rik_E9Q3M9_S507s_1	-1.39	1.53	1.41	-0.46	1.49	0.52	0.48	1.21	1.48	-1.18	1.9	2.34	2.37	0.36	1.44	0.6	0.6525	0.8625	0.92	0.346176	0.363186	0.236198	1	0.999631	0.683301
2010300C02Rik_E9Q3M9_S570s_1	-1.25	0.27	1.33	-0.24	0.82	-0.66	0.41	0.59	0.5	-1.42	1.62	1.59	1.25	-0.08	1.59	0.42	0.2625	0.545	0.7675	0.648403	0.493103	0.220141	1	0.999631	0.670699
2010300C02Rik_E9Q3M9_S572s_1	-0.8	0.09	0.75	0.09	0.41	-0.21	0.85	0.11	0.26	-1.29	1.11	1.57	0.86	-0.23	1.57	0.52	0.2575	0.38	0.6475	0.52018	0.553884	0.196027	1	0.999631	0.653373
2010300C02Rik_E9Q3M9_S612s_1	-2.15	1.1	3.18	-0.39	1.73	-0.04	0.32	2.11	1.25	-2.05	1.18	3.36	2.04	0.07	2.74	2.06	0.595	0.5	1.2925	0.580695	0.71283	0.248653	1	0.999631	0.685824
2010300C02Rik_E9Q3M9_S712s_1	0.26	0.3	0.17	0.47	0.28	0.52	-0.23	0.61	0.11	0.05	-0.03	0.89	-0.07	0.98	0.24	1.05	-0.005	-0.045	0.25	0.985738	0.880533	0.474263	1	0.999631	0.799827
2010300C02Rik_E9Q3M9_S730s_1	0.75	1.55	-0.04	-0.47	-0.04	1.36	-1.3	-0.16	0.96	1.66	-1.12	0.09	-1.01	2.62	0.66	-0.71	-0.4825	-0.05	-0.0575	0.451684	0.940374	0.943876	1	0.999631	0.981629
2010300C02Rik_E9Q3M9_S898s_1	2	0.8	-0.57	1.82	2.62	1.82	1.49	1.83	1.8	0.55	1.09	0.28	-1.46	1.57	0.96	1.13	0.9275	-0.0825	-0.4625	0.133512	0.893333	0.560425	1	0.999631	0.839898
2010300C02Rik_E9Q3M9_S918s_1	1.78	-0.73	-1.97	1	1.38	0.3	1.61	0.71	0.66	-0.01	0.74	-1.32	-1.85	-0.34	-0.38	-1.33	0.98	-0.0025	-0.995	0.230978	0.997645	0.234353	1	1	0.683223
2010300C02Rik_E9Q3M9_S92s_1	0.38	0.2	-0.68	0.12	0.45	-0.43	-0.39	0.26	0.02	0.13	-0.16	-0.25	-1.23	0.02	-0.11	0.34	-0.0325	-0.07	-0.25	0.926507	0.823765	0.560042	1	0.999631	0.839805
2010300C02Rik_E9Q3M9_S95s_1	0.27	-0.61	-1.39	0.26	0.81	-1.28	-0.5	-0.23	-0.16	-1.01	-0.51	0.19	-2.24	-0.15	-0.55	-0.35	0.0675	-0.005	-0.455	0.900649	0.991333	0.435396	1	0.999631	0.780052
2010300C02Rik_E9Q3M9_S961s_1	-0.01	0.17	0.05	0.14	-0.24	0.2	-0.19	0.35	-0.01	0.32	0.24	0.54	0.61	0.28	0.48	0.65	-0.0575	0.185	0.4175	0.824015	0.475156	0.138897	1	0.999631	0.611718
2010300C02Rik_E9Q3M9_T660t_1	-0.69	0.47	-0.11	-0.54	0.04	0.01	-0.56	-0.13	-0.13	-0.26	-0.25	0.03	0.46	0.35	0	0.05	0.0575	0.065	0.4325	0.863167	0.841413	0.228117	1	0.999631	0.679038
2010300C02Rik_E9Q3M9_T959t_1	-0.22	-0.25	0.15	-0.21	-0.2	-0.82	-0.64	0.14	-0.65	-0.08	-0.25	0.54	-0.32	-0.21	0.2	0.21	-0.2475	0.0225	0.1025	0.417472	0.94435	0.723321	1	0.999631	0.905674
2010300C02Rik_F7B0R9_S599s_1	1.29	0.6	0.77	1.65	1.36	0.79	1.9	1.61	1.4	0.11	1.84	1.04	-0.66	0.87	-0.07	1.92	0.3375	0.02	-0.5625	0.36032	0.963394	0.333282	1	0.999631	0.728079
2310035C23Rik_G3X9J4_S141s_1	-0.8	0.34	0.15	-0.64	-0.75	-0.36	-0.01	0.68	-0.48	0.03	0.1	0.35	0.16	-0.05	-0.13	0.1	0.1275	0.2375	0.2575	0.758322	0.51831	0.46684	1	0.999631	0.795267
2310035C23Rik_G3X9J4_S180s_1	0	0.16	-0.77	-0.55	0.13	0.24	-0.68	-1.18	0.1	-0.22	-0.4	-0.84	-0.56	-0.1	-0.84	0.22	-0.0825	-0.05	-0.03	0.838947	0.883224	0.934919	1	0.999631	0.979037
2310035C23Rik_G3X9J4_S182s_1	0.31	0.47	-0.19	0.43	0.52	0.2	0.02	0.37	0.43	0.21	0.64	0.67	-0.29	0.3	0.27	0.79	0.0225	0.2325	0.0125	0.934545	0.417243	0.970336	1	0.999631	0.989586
2310035C23Rik_G3X9J4_S193s_1	1.16	-0.06	1.36	1.3	-0.57	0.35	2.98	-0.28	0.38	1.43	1.25	0.73	-1	-1.28	0.16	-0.58	-0.32	0.0075	-1.615	0.678257	0.985658	0.00509488	1	0.999631	0.351308
2310035C23Rik_G3X9J4_S243s_1	-0.23	0.58	0	-0.14	0.15	0.34	-0.55	0.26	0.29	0.18	-0.05	0.14	0.79	0.63	-0.06	0.09	-0.0025	0.0875	0.31	0.993776	0.759978	0.372106	1	0.999631	0.746839
2310035C23Rik_G3X9J4_S244s_1	-0.23	0.58	0.25	0.15	0.15	0.34	-0.36	0.49	0.29	0.18	0.36	0.54	0.79	0.63	0.28	0.57	-0.0325	0.155	0.38	0.915606	0.583017	0.226437	1	0.999631	0.677523
2310035C23Rik_G3X9J4_S422s_1	-0.64	1.39	2.22	1.96	1.8	1.88	2.7	2.16	2.22	-0.15	2.29	2.5	-0.19	0.8	1.61	0.84	0.9025	0.4825	-0.4675	0.163108	0.545599	0.488327	1	0.999631	0.80665
2310035C23Rik_G3X9J4_S56s_1	-0.68	0.01	-0.46	-1.03	-0.24	-0.54	-0.48	-0.7	-0.22	-0.81	-0.46	-0.22	0.04	0.02	-1.11	-0.84	0.05	0.1125	0.0675	0.8678	0.725019	0.864112	1	0.999631	0.955131
2310035C23Rik_G3X9J4_T143t_1	-0.08	-0.05	0.24	-0.21	-0.09	-0.04	-0.57	-0.52	-0.2	-0.35	-0.28	-0.14	0.56	-0.04	0.04	-0.02	-0.28	-0.2175	0.16	0.306579	0.395128	0.584648	1	0.999631	0.849205
4833439L19Rik_D3Z1F7_S164s_1	0.15	0.73	1.67	0.65	0.15	0.48	0.69	1.65	0.15	0.92	1.73	1.49	0.65	1.27	2.17	1.52	-0.0575	0.2725	0.6025	0.895997	0.557584	0.198039	1	0.999631	0.65543
4931406P16Rik_Q8C5X1_S662s_1	1.32	1.45	0.97	0.71	1.04	1.34	0.84	0.88	1.36	1.53	1.48	0.74	1.21	1.52	0.28	2.3	-0.0875	0.165	0.215	0.756882	0.600912	0.634233	1	0.999631	0.868569
5031439G07Rik_B1APX2_S30s_1	1.99	-0.49	-1.41	1.51	1.36	0.48	1.35	0.44	1.06	0.03	0.3	-0.71	-1.7	-0.4	-0.93	-0.71	0.5075	-0.23	-1.335	0.501172	0.76845	0.0995037	1	0.999631	0.562298
5031439G07Rik_B1APX2_S311s_2	-1.89	-1.4	-0.58	-1.81	-0.81	-0.93	-1.76	-1.88	-0.57	-1.73	-0.94	-1.66	-0.62	-0.35	-1.11	-2.21	0.075	0.195	0.3475	0.854329	0.641511	0.483992	1	0.999631	0.803422
5031439G07Rik_B1APX2_S322s_1	-0.48	0.11	-1.9	-1.76	-0.7	-0.2	-0.88	-1.46	-0.29	-0.92	-4.12	-0.88	-0.97	-0.97	0.17	-0.43	0.1975	-0.545	0.4575	0.703138	0.534775	0.39542	1	0.999631	0.760219
5031439G07Rik_B1APX2_S322s_2	-1.64	-0.99	-1.15	-1.95	-0.43	-0.58	-1.69	-1.54	-0.66	-1.58	-1	-1.39	-0.77	-0.56	-1.35	-2.27	0.3725	0.275	0.195	0.359651	0.432314	0.661703	1	0.999631	0.88095
5031439G07Rik_B1APX2_S347s_1	0	0.98	1.39	0.79	0.65	0.95	0.53	0.78	1.16	0.99	-0.39	0.73	1.1	1.59	1.05	1.51	-0.0625	-0.1675	0.5225	0.85425	0.708785	0.176565	1	0.999631	0.642116
5031439G07Rik_B1APX2_S405s_1	-1.17	0.47	-0.18	0.09	0.38	0.29	-0.23	0.28	0.64	-0.51	0.6	0.54	0.74	0.94	0.36	0.56	0.3775	0.515	0.8475	0.34161	0.260332	0.0550074	1	0.999631	0.492066
5031439G07Rik_B1APX2_T336t_1	-1.11	-0.01	0.14	-0.73	-0.35	-0.38	-0.75	-0.18	-0.18	-0.21	0	0.38	0.38	-0.21	0.33	0.44	0.0125	0.425	0.6625	0.971435	0.2545	0.0999185	1	0.999631	0.562917
5730455P16Rik_J3KMQ6_S19s_1	0.53	0.7	0.9	1.06	0.62	0.51	0.41	0.94	0.71	1.48	0.67	0.85	0.19	0.25	0.5	0.17	-0.1775	0.13	-0.52	0.50567	0.664679	0.0857861	1	0.999631	0.551251
6330403A02Rik_J3QP43_S27s_1	-0.56	-0.62	-0.59	-0.53	-0.47	-0.07	-0.75	-0.57	-0.59	-0.1	-0.51	-0.17	0.1	-0.59	-0.29	-0.05	0.11	0.2325	0.3675	0.668955	0.374863	0.213645	1	0.999631	0.667153
6330403A02Rik_J3QP43_S28s_1	-0.33	-0.93	-1.01	-0.94	-0.67	-0.83	-1.26	-1.12	-0.63	-0.45	-0.99	-1.02	-0.45	-0.76	-0.89	-0.9	-0.1675	0.03	0.0525	0.559591	0.918552	0.860302	1	0.999631	0.953592
6330403A02Rik_J3QP43_S29s_1	-0.78	-1.34	0.99	-0.87	-1.13	-0.89	-1.34	0.28	-1.03	-0.37	-0.84	-0.1	0.34	-1.53	-0.23	-0.2	-0.27	-0.085	0.095	0.638161	0.870202	0.872491	1	0.999631	0.959468
6430548M08Rik_Q3TA40_S208s_1	0.67	-1.4	-1.08	0.41	0.65	0.24	-0.08	-0.54	-2.03	-1.63	-0.42	-1.01	-1.12	-0.62	-0.74	-0.14	0.4175	-0.9225	-0.305	0.441724	0.134488	0.565424	1	0.999631	0.84139
6430548M08Rik_Q3TA40_S275s_1	-1.43	-1.08	-0.84	-1.21	-1.17	-1.32	-1.25	-1.16	-1.21	-1.05	-1.09	-0.96	-0.46	-0.92	-1.09	-0.86	-0.085	0.0625	0.3075	0.73451	0.810163	0.310388	1	0.999631	0.71924
6430548M08Rik_Q3TA40_S72s_1	-0.62	0.99	0.35	0.7	0.37	0.46	-0.5	1.33	0.71	0.87	0.42	0.02	0.88	0.58	0.75	0.81	0.06	0.15	0.4	0.901369	0.712875	0.315539	1	0.999631	0.72069
8030462N17Rik_Q0VAW6_S145s_1	0.29	0.35	1.06	1.51	0.27	0.04	1.18	0.91	0	0.51	0.88	0.65	0.01	-1.22	1.07	-0.19	-0.2025	-0.2925	-0.885	0.615596	0.440943	0.114612	1	0.999631	0.579001
8030462N17Rik_Q0VAW6_S66s_1	0.35	1.58	0.59	1.64	0.81	0.93	0.62	0.38	1.11	0.84	0.55	0.97	1	1.33	1.07	0.52	-0.355	-0.1725	-0.06	0.351125	0.649214	0.880299	1	0.999631	0.963151
A0A0G2JDV2_S170s_1	0.45	0.89	0.74	0.46	1.14	1.24	-0.22	0.24	1.21	1.68	-1.81	-0.51	1.08	1.33	0.54	-0.32	-0.035	-0.4925	0.0225	0.92704	0.498868	0.955477	1	0.999631	0.984649
A0A0G2JFH6_S27s_1	0.36	-0.78	0.01	-0.8	-1.66	-0.1	0.97	-0.28	-0.29	1.18	-0.08	1.15	0.36	0.28	-0.22	-0.49	0.035	0.7925	0.285	0.950174	0.117492	0.46729	1	0.999631	0.795438
A0A0G2JFH6_S28s_1	1.86	-0.75	0.95	-0.1	1.2	-0.04	-1.06	1.3	0.13	1.63	-0.03	0.62	-1.1	0.24	-0.23	-2.25	-0.14	0.0975	-1.325	0.843595	0.87532	0.0838797	1	0.999631	0.549732
A0A0G2JGJ4_S77s_1	1.11	-0.27	2.22	1.14	-0.93	-0.59	1.18	0.23	-0.38	0.21	0.3	0.03	-0.4	-0.6	0.74	0.52	-1.0775	-1.01	-0.985	0.108834	0.0690487	0.104539	1	0.999631	0.568213
A0A0J9YUM2_S765s_1	0.84	-0.27	-0.17	0.41	1.54	0.17	1.05	0.27	0.47	-1.63	0.65	0.16	-1.96	-0.14	-0.85	-0.02	0.555	-0.29	-0.945	0.202198	0.596329	0.0804746	1	0.999631	0.545579
A0A0J9YUM2_S766s_1	-0.13	-0.44	0.3	0.83	0.99	-0.09	1.4	0.62	0.06	-1.9	1.16	0.66	-1.03	-0.61	-0.29	0.67	0.59	-0.145	-0.455	0.178953	0.824011	0.327288	1	0.999631	0.724678
A0A0J9YVH8_S1262s_1	-0.51	0.13	0.32	-0.79	1.23	-0.31	-0.37	0.15	-1.44	-2.85	0.76	-0.67	-1.07	-1.63	-0.02	-0.4	0.3875	-0.8375	-0.5675	0.389529	0.255125	0.220502	1	0.999631	0.670752
A0A0N4SUT6_T239t_1	-0.12	0.49	0.04	-0.33	0.76	0.24	0.08	-0.07	-0.31	-0.86	-0.29	0.03	0.91	0.53	1.58	1.54	0.2325	-0.3775	1.12	0.456778	0.250345	0.0101869	1	0.999631	0.383133
A0A0N4SW73_S1188s_1	1.03	-0.06	1.1	0.87	0.23	2.08	0.99	0.61	0.06	1.69	-0.42	-0.11	-0.49	2.4	0.81	0.98	0.2425	-0.43	0.19	0.6017	0.4102	0.749337	1	0.999631	0.912137
A0A0N4SW93_S866s_1	1.16	0.08	-0.42	0.57	1.38	0.04	0.34	0.16	0.28	-0.58	-0.03	-0.32	-0.98	0.08	-0.75	-0.09	0.1325	-0.51	-0.7825	0.765208	0.220314	0.093843	1	0.999631	0.558128
A0A0R4J006_S143s_1	-0.5	0.36	-0.15	-0.08	0.1	-0.83	-0.52	-0.54	-0.3	0.44	-0.07	0.32	-0.4	0.41	0.32	-0.04	-0.355	0.19	0.165	0.275986	0.546485	0.61906	1	0.999631	0.861888
A0A0R4J0J1_S543s_1	-0.32	-1.2	-1.31	-0.44	-0.64	-0.83	-0.37	-1.01	-0.62	-0.71	-1.19	-1.65	-0.81	-0.32	-1.49	-0.86	0.105	-0.225	-0.0525	0.7511	0.551233	0.891183	1	0.999631	0.96415
A0A0R4J0K0_T176t_1	0.13	-0.19	-0.43	0.13	0.01	-0.09	-0.09	0.28	0.13	-0.6	-0.22	-0.25	-0.71	-0.3	0.05	0.59	0.1175	-0.145	-0.0025	0.656565	0.618128	0.994429	1	0.999631	0.997705
A0A0R4J0M1_S162s_1	-1.2	-0.42	0.67	-1.43	-0.24	-0.47	-0.83	0.28	-0.6	-0.63	-0.38	-0.92	-0.04	-0.19	-0.77	0.37	0.28	-0.0375	0.4375	0.575395	0.936384	0.395656	1	0.999631	0.760249
A0A0R4J1E3_S613s_1	-0.69	-0.35	-0.62	-0.53	-0.41	-0.62	-0.82	-0.71	-0.27	-0.5	-0.73	-0.3	0.13	0.01	-0.55	-0.21	-0.0925	0.0975	0.3925	0.706516	0.706815	0.194317	1	0.999631	0.65176
A0A0R4J216_S30s_1	0.25	0.22	-0.07	0.38	-0.23	0.18	-0.25	0.01	-0.49	1.49	0	-1.04	-0.16	-0.04	-0.11	-0.64	-0.2675	-0.205	-0.4325	0.306673	0.693463	0.156375	1	0.999631	0.626452
A0A0R4J216_T23t_1	1.17	-0.22	-1.39	-0.72	-0.33	-0.79	-0.46	-2.3	-1.42	0.28	0.22	-2.17	-0.35	-1.39	-1.34	-1.19	-0.68	-0.4825	-0.7775	0.298073	0.510063	0.180805	1	0.999631	0.64376
A0A0U1RPY2_S57s_1	1.7	0.71	0.79	0.44	-0.95	1.08	2.24	-1.05	-0.28	1.57	-1.73	-1.04	-0.36	-0.62	-0.66	-0.96	-0.58	-1.28	-1.56	0.444355	0.0850563	0.0012927	1	0.999631	0.351308
A0A140LHX7_S67s_1	-0.29	0.45	-0.27	-0.6	-0.29	0.27	-1.02	-0.59	-0.01	0.28	-0.61	-0.13	0.87	0.41	-0.58	0.22	-0.23	0.06	0.4075	0.537613	0.858704	0.321151	1	0.999631	0.72408
A0A140LHX7_S68s_1	-0.61	-1.18	0.47	-0.32	-1.6	-1.75	-0.55	-0.18	-1.58	-1.04	0.16	0.34	-0.2	-1.01	0	0.8	-0.61	-0.12	0.3075	0.230323	0.823697	0.533173	1	0.999631	0.827798
A0A140LI67_S906s_1	1.5	0.28	0.44	-0.45	0	-0.36	-0.13	-0.24	0.35	1.4	-0.4	-0.18	-0.88	-1.05	1.05	-1.26	-0.625	-0.15	-0.9775	0.150697	0.777792	0.131544	1	0.999631	0.603456
A0A140LIW3_S1289s_1	0.87	-0.63	-0.29	0.05	-0.82	-0.19	0.48	0.46	-1.77	0.07	-0.11	-0.1	-1.02	-0.17	0.01	0.13	-0.0175	-0.4775	-0.2625	0.967943	0.35957	0.540301	1	0.999631	0.831295
A0A140LIW3_S1290s_1	0.87	-0.63	-0.25	0.33	-0.82	-0.19	0.82	0.57	-1.77	0.07	0.15	-0.23	-1.02	-0.17	-0.47	0	0.015	-0.525	-0.495	0.974691	0.327895	0.249519	1	0.999631	0.686359
A0A140LIW3_S1350s_1	-0.41	-0.39	0.1	-0.67	0.31	0.16	-0.26	-1.29	0.06	-0.19	-2	-3.07	0.52	-0.2	-1	-0.24	0.0725	-0.9575	0.1125	0.855984	0.182921	0.769682	1	0.999631	0.918554
A0A140LIW3_S1450s_1	-0.71	-0.56	0.14	-0.31	-0.62	-0.55	-0.66	0.32	-0.84	-0.27	-0.32	0.25	0.9	0.07	-0.11	-0.18	-0.0175	0.065	0.53	0.958444	0.847268	0.163575	1	0.999631	0.631937
A0A140LJD2_S105s_1	-0.43	-0.12	-0.17	-0.5	-0.06	0.11	-0.74	-0.24	0.12	0.17	-0.29	-0.02	-0.03	0.64	-0.34	0.34	0.0725	0.3	0.4575	0.798587	0.268874	0.172639	1	0.999631	0.642116
A0A1B0GQW2_S50s_1	0.72	0.17	0.34	0	-0.06	-0.04	0.19	0.35	0.02	1.03	0.58	0.78	0.12	0.37	0.54	0.58	-0.1975	0.295	0.095	0.474403	0.370725	0.749252	1	0.999631	0.912137
A0A1B0GR85_S1132s_1	-0.61	0.24	-0.4	0.03	0.38	0.58	-0.25	-0.48	0.16	-0.33	0.61	-0.64	0.05	0.58	-0.31	0.65	0.2425	0.135	0.4275	0.49186	0.713291	0.244466	1	0.999631	0.685751
A0A1B0GR85_S1194s_1	0.08	-1.02	-1.27	-1.1	-0.37	0.01	-0.47	-2.68	-1.68	-1.67	-1.48	-0.57	-0.22	-0.67	-0.66	-1.63	-0.05	-0.5225	0.0325	0.935092	0.224079	0.94025	1	0.999631	0.981146
A0A1B0GR85_S1194s_2	-0.22	-0.94	0.37	1.09	-0.85	-1.52	1.14	0.47	-0.81	-0.06	0.03	-0.27	-2.89	-2.18	-0.58	-0.07	-0.265	-0.3525	-1.505	0.690314	0.449379	0.0537926	1	0.999631	0.4909
A0A1B0GR85_S1202s_2	-0.22	-0.94	0.37	1.09	-0.85	-1.52	1.14	0.47	-0.81	-0.06	0.03	-0.27	-2.89	-2.18	-0.58	-0.07	-0.265	-0.3525	-1.505	0.690314	0.449379	0.0537926	1	0.999631	0.4909
A0A1B0GR85_S1331s_1	-0.2	0.11	0.31	-0.32	-0.02	0.28	-0.54	0.09	-0.53	0.26	-0.07	0.05	0.39	0.16	-0.52	0.17	-0.0225	-0.0475	0.075	0.939066	0.873474	0.81695	1	0.999631	0.937777
A0A1B0GR85_S1454s_1	-0.09	0.52	0.37	0.23	-0.07	0.77	-0.02	0.31	0.1	1.11	0.12	0.31	0.04	1.13	-0.09	0.56	-0.01	0.1525	0.1525	0.973203	0.642008	0.671567	1	0.999631	0.884779
A0A1B0GS09_S77s_1	0.46	-0.13	-0.31	-0.27	0.29	0.52	-0.48	-0.09	0	0.23	-1.22	0.39	0.54	1.25	-0.32	-0.39	0.1225	-0.0875	0.3325	0.708434	0.832342	0.450834	1	0.999631	0.787797
A0A1D5RLB2_S38s_1	0.34	-0.37	-0.17	0.26	-0.63	-0.17	-0.03	-0.42	-0.29	0.59	-0.41	0.19	0.06	-0.75	0.01	-0.24	-0.3275	0.005	-0.245	0.273127	0.988083	0.461164	1	0.999631	0.792226
A0A1D5RLL0_S106s_1	-0.11	0.42	0.4	-0.23	-0.07	0.2	0.13	0.48	0.38	0.36	0.73	0.31	1.02	0.24	-0.21	-0.06	0.065	0.325	0.1275	0.818226	0.271414	0.728938	1	0.999631	0.905923
A0A1W2P772_S197s_1	-0.41	-0.79	-0.73	-0.66	-0.62	-0.43	-1.45	-0.63	-1.69	-0.58	-0.29	-0.51	-0.39	0.08	-0.28	-0.82	-0.135	-0.12	0.295	0.657297	0.738504	0.343818	1	0.999631	0.733852
A0A1W2P772_S207s_1	0.7	0.09	0.3	0.77	0.24	0.15	0.49	0.52	-0.23	-0.01	0.39	-0.77	-1.35	0.07	-1.08	0.32	-0.115	-0.62	-0.975	0.676031	0.0914864	0.0500849	1	0.999631	0.488436
A0A1W2P772_S210s_1	-0.49	-3.81	0.17	0.91	-0.91	-3.55	0.52	0.95	-2.67	-3.17	-0.45	1.2	-2.97	-3.34	0.54	0.37	0.0575	-0.4675	-0.545	0.962976	0.707705	0.663414	1	0.999631	0.881968
A0A1W2P832_S760s_1	0.39	0.03	0.09	0.49	0.37	0.27	0.24	0.47	0	0.15	-0.18	0.78	-0.51	0.98	0.65	0.4	0.0875	-0.0625	0.13	0.725155	0.838758	0.73087	1	0.999631	0.906897
A0A1W2P832_S776s_1	1.06	2.34	1.38	1.34	1.73	1.71	0.47	1.46	1.95	1.76	1.09	1.48	2.06	1.84	1.88	1.96	-0.1875	0.04	0.405	0.6479	0.912899	0.256881	1	0.999631	0.691567
A0A1Y7VKX4_S609s_1	0.54	0.25	1.69	0.79	-0.1	0.45	0.81	1.02	0.47	0.54	1.14	1.01	-0.01	-0.13	1.09	1.09	-0.2725	-0.0275	-0.3075	0.50117	0.941807	0.503738	1	0.999631	0.814226
A0A1Y7VLQ2_S103s_2	-0.14	1.36	-0.1	-0.04	-0.73	0.74	-1.28	-0.9	-0.57	-0.67	1.37	-0.77	-0.64	1.81	0.46	-0.02	-0.8125	-0.43	0.1325	0.148986	0.462235	0.820167	1	0.999631	0.938303
A0A1Y7VLQ2_S95s_2	-0.14	1.36	-0.1	-0.04	-0.73	0.74	-1.28	-0.9	-0.57	-0.67	1.37	-0.77	-0.64	1.81	0.46	-0.02	-0.8125	-0.43	0.1325	0.148986	0.462235	0.820167	1	0.999631	0.938303
A0A1Y7VNP1_S418s_2	0.09	0.27	0.22	0.31	0.21	-0.12	0.6	-0.38	0	-0.16	0.27	-0.48	-0.24	0.58	0.45	0.88	-0.145	-0.315	0.195	0.618609	0.263204	0.549203	1	0.999631	0.83507
A0A1Y7VNP1_S421s_2	-0.05	0.2	0.22	0.31	0.31	-0.81	0.6	-0.38	0.06	-0.44	0.27	-0.48	-1.04	0.58	0.45	0.88	-0.24	-0.3175	0.0475	0.505392	0.286702	0.913871	1	0.999631	0.972551
A0A1Y7VNZ6_S556s_1	1.03	0.36	0.62	0.34	1.54	0.5	0.58	0.8	0.52	1.19	1.05	0.39	-0.78	0.56	0.11	0.88	0.2675	0.2	-0.395	0.423793	0.531168	0.349499	1	0.999631	0.736887
A0A286YCB8_S126s_1	0.16	0.69	0.64	-0.08	0.98	0.1	-0.17	-0.23	1.03	0.36	-0.02	0.94	0.27	1.39	-1.99	0.49	-0.1825	0.225	-0.3125	0.614509	0.525003	0.639687	1	0.999631	0.870995
A0A286YCB8_S127s_1	1.34	3.73	0.79	0.67	2.64	3.21	-0.15	-0.03	-0.06	2.54	0.42	0.82	4.12	3.36	0.61	1.13	-0.215	-0.7025	0.6725	0.825576	0.389649	0.485638	1	0.999631	0.804287
A0A286YCB8_S131s_1	-0.97	0	0.36	-0.26	-0.21	-0.02	-0.7	0.13	-0.94	-0.99	0.52	-0.12	0.99	0.39	0.1	-0.14	0.0175	-0.165	0.5525	0.961054	0.714149	0.185849	1	0.999631	0.646224
A0A286YCX6_S971s_1	-0.1	-1.26	-1.42	-1.29	-1.03	-1.75	-1.16	-0.93	-1.17	-2.15	-1.63	-1.23	0.22	-1.21	-0.55	-1.25	-0.2	-0.5275	0.32	0.596059	0.203644	0.490202	1	0.999631	0.807727
A0A286YCX6_T968t_1	-1	-0.82	-0.05	-0.48	-0.43	-0.39	-1.3	0.28	-0.9	0.11	-1.07	-1.62	-0.41	0.07	0.78	0.91	0.1275	-0.2825	0.925	0.746106	0.506716	0.0400021	1	0.999631	0.472195
A0A286YD83_S49s_1	-1.15	-1.34	-2.79	-2.16	-1.58	-1.76	-3.16	-3.15	-1.55	-0.47	-1.87	-2.14	-0.56	-1.72	-1.86	-1.98	-0.5525	0.3525	0.33	0.311676	0.486849	0.50155	1	0.999631	0.814092
A0A286YDE4_S719s_1	1.89	-0.28	-0.28	0.94	0.54	0.37	1.73	0.2	0.6	0.93	0.2	-0.28	-1.18	-0.74	0.12	-0.4	0.1425	-0.205	-1.1175	0.804067	0.707914	0.0661452	1	0.999631	0.516933
A0A286YDL2_S718s_1	0.2	1.16	0.67	0.02	0.4	0.27	-0.59	-0.46	0.21	0.77	0.79	-0.12	0.21	0.99	0.03	0.24	-0.6075	-0.1	-0.145	0.129146	0.785985	0.698634	1	0.999631	0.895842
A0A286YDL2_S741s_1	1.01	0.07	-0.63	0.7	0.69	-0.47	0.81	0.1	-0.12	-0.46	1.04	-0.47	-0.81	-0.02	-1	0.28	-0.005	-0.29	-0.675	0.991155	0.554907	0.170543	1	0.999631	0.64073
A0A286YDL2_S741s_2	1.36	0.74	-0.29	1.69	1.41	0.47	1.07	1.09	0.68	-0.06	1.12	0.2	-1.49	1.31	0.66	0.9	0.135	-0.39	-0.53	0.768826	0.430014	0.442541	1	0.999631	0.782367
A0A286YDL2_S745s_1	0.14	0.61	0.14	0.54	-0.27	0.4	-0.21	0.38	0.26	0.69	0.69	0.47	-0.28	0.8	1.22	0.89	-0.2825	0.17	0.3	0.345114	0.535266	0.44103	1	0.999631	0.781983
A0A286YDL2_S745s_2	1.36	0.74	-1.14	0.26	1.41	0.47	-0.03	-0.15	0.68	-0.06	0.12	-1.19	-1.49	1.31	-0.38	-0.36	0.12	-0.4175	-0.535	0.836321	0.493241	0.449298	1	0.999631	0.786904
A0A286YDL2_S750s_1	-0.85	-3.01	-1.83	-2.53	-2.23	-2.83	-1.55	-2.19	-1.61	-1.04	-1.25	-1.91	-1.74	-2.11	-2.7	-4.08	-0.145	0.6025	-0.6025	0.773342	0.233258	0.349073	1	0.999631	0.736748
A0A2C9F2C1_S114s_1	-0.71	-1.08	-0.49	0.39	0.39	-0.54	0.43	-0.56	-0.5	-0.74	-0.01	0.96	-0.82	0.25	-1.11	0.12	0.4025	0.4	0.0825	0.344598	0.405655	0.856542	1	0.999631	0.951817
A0A2I3BPI6_T9t_1	-0.85	-1.15	0.42	0.15	-0.74	-0.82	0.51	0.28	0.41	-1.19	0.29	0.36	0.21	-0.72	0.22	-0.15	0.165	0.325	0.2475	0.733718	0.529315	0.578519	1	0.999631	0.84622
A0A2I3BQ39_S187s_1	0.63	-1.01	0.19	1.23	1.34	0.33	0.9	1.11	0.57	0.21	-0.15	0.5	-1.05	-0.76	-0.07	0.01	0.66	0.0225	-0.7275	0.19958	0.962664	0.177962	1	0.999631	0.642395
A0A2I3BQP6_S426s_1	0.18	0.22	-0.07	0.49	0.41	-0.2	0.09	0.2	-0.05	-0.19	0.05	0.02	-0.15	-0.03	-0.42	0.09	-0.08	-0.2475	-0.3325	0.764903	0.34818	0.260614	1	0.999631	0.692669
A0A2I3BRN2_S374s_1	2.27	-1.58	-0.1	0.1	-1.04	-0.14	1.83	-0.71	-1.06	1.43	-0.84	-1.18	-0.62	-1.05	-0.14	-1.74	-0.1875	-0.585	-1.06	0.832181	0.509259	0.18281	1	0.999631	0.643861
A0A2R8VHB6_S125s_1	0.41	0.39	-0.48	-0.51	0.69	0.07	-0.67	-0.68	0.59	0.17	-0.46	0.3	0.33	0.5	0.19	-0.18	-0.1	0.1975	0.2575	0.810329	0.594882	0.470527	1	0.999631	0.797463
A0A2R8VHB6_S130s_1	-0.13	0.78	0.6	0.95	1.62	1.15	0.49	1.23	-0.16	0.86	0.99	1.2	1.26	0.22	1.24	1.04	0.5725	0.1725	0.39	0.134389	0.666083	0.316285	1	0.999631	0.720734
A0A2R8VHB6_S148s_1	1.58	-0.63	0.4	-0.41	-1.64	0.26	2.66	-1.84	-1.14	1.96	-0.99	-0.9	-0.62	-1.51	-1.63	-1.41	-0.375	-0.5025	-1.5275	0.707886	0.528108	0.0139881	1	0.999631	0.385092
A0A2R8VHB6_S148s_2	-1.9	0.47	-1.1	-1.69	-0.76	0.12	-0.93	-1.46	-0.53	-0.16	-1.52	-0.92	1.44	-0.11	-1.89	-1.82	0.2975	0.2725	0.46	0.605651	0.629926	0.582827	1	0.999631	0.848004
A0A2R8W6P0_S335s_1	-0.2	-0.44	-0.63	-0.33	-0.27	-0.6	-0.67	-0.39	-0.7	-0.52	-0.68	-0.71	0.36	-0.5	-0.64	-0.27	-0.0825	-0.2525	0.1375	0.742284	0.32476	0.669957	1	0.999631	0.884054
A0A3B2WBC6_S10s_1	-0.55	0.22	-0.4	-0.08	0.18	-0.56	-0.76	-0.69	-0.3	0.26	-0.38	-0.26	0.95	0.67	-0.14	-0.03	-0.255	0.0325	0.565	0.436811	0.91388	0.143291	1	0.999631	0.614578
A0A3B2WCD2_S1010s_1	0.81	0.03	-0.28	0.7	0.24	0.51	1.46	-0.35	-0.99	1.41	0.02	-0.88	-0.77	-0.75	-0.79	-1.31	0.15	-0.425	-1.22	0.73696	0.459196	0.00567834	1	0.999631	0.351545
A0A3B2WCD2_S1019s_1	-0.52	0.64	-0.14	-0.29	0.09	0.46	0.42	0.07	0.83	0.25	0.79	0.67	1.13	0.53	0.59	0.35	0.3375	0.7125	0.7275	0.306171	0.0555409	0.0636063	1	0.999631	0.513165
A0A3B2WCD2_S1217s_1	1.47	-0.74	0.14	-0.18	-1.99	0.2	1.24	-1.72	-1.66	1.58	-0.21	-1.52	-0.89	-1.02	-1.07	-1.77	-0.74	-0.625	-1.36	0.361234	0.430865	0.0185591	1	0.999631	0.391024
A0A3B2WCD2_S1301s_1	0.8	0.87	1.72	1.59	0.07	0.6	1.5	1.3	0.85	0.61	0.36	2.32	1.31	0.8	2.03	0.99	-0.3775	-0.21	0.0375	0.364916	0.663393	0.923458	1	0.999631	0.975032
A0A3B2WCD2_S1379s_1	0.09	0.01	-1.19	0.77	0.7	-0.82	0.77	-0.15	-0.22	-1.31	0.71	-0.56	0.02	-0.32	-0.93	0.25	0.205	-0.265	-0.165	0.692696	0.627604	0.726849	1	0.999631	0.905774
A0A3B2WCD2_S877s_1	-1.07	1.07	0.65	-0.35	1.07	0.35	0.54	0.42	0.91	-0.35	1.38	1.63	1.83	0.22	1.53	0.42	0.52	0.8175	0.925	0.29673	0.19217	0.132721	1	0.999631	0.604583
A0A3B2WCD2_S898s_1	-0.62	-0.52	-0.01	-0.28	-0.25	0.02	-0.59	-0.99	-1.02	-0.53	-0.17	0.22	0.09	-0.23	-1.1	0.49	-0.095	-0.0175	0.17	0.760749	0.9591	0.666528	1	0.999631	0.88264
A0A3B2WCD2_S951s_1	-1.47	0.46	-0.05	-0.01	0.23	0.13	0.19	-0.03	0.47	-0.33	0.91	0.53	1	0.67	0.93	0.7	0.3975	0.6625	1.0925	0.353096	0.184217	0.0281162	1	0.999631	0.423977
A0A3Q4EBK4_S301s_1	-0.54	0.23	1.42	-0.17	0.31	-0.13	0.01	0.21	-0.64	-1.41	0.18	-0.35	-1.01	0.26	-0.55	1.3	-0.135	-0.79	-0.235	0.753361	0.144719	0.697371	1	0.999631	0.895731
A0A494B917_S42s_1	-0.2	-0.46	-0.12	-0.75	0.97	-1.1	-0.27	0.84	0.09	-0.56	0.87	1.01	-1.32	0.13	0.33	0.42	0.4925	0.735	0.2725	0.321078	0.0932503	0.536924	1	0.999631	0.830094
A0A494BAF6_S191s_1	0.87	1.5	1.3	0.77	0.02	0.49	0.53	0.72	0.82	0.51	1.04	1.3	1.3	-0.06	0.17	0.14	-0.67	-0.1925	-0.7225	0.044182	0.537878	0.0854684	1	0.999631	0.551124
A0A498WGM0_S167s_1	0.49	-0.32	-0.38	-0.56	-0.24	0.34	0.02	0.04	-1.68	-0.16	-0.76	-0.9	-0.51	-0.17	-0.32	-0.73	0.2325	-0.6825	-0.24	0.465408	0.114194	0.477636	1	0.999631	0.800237
A0A571BDA2_S895s_1	0.35	0.37	-0.52	-0.51	-0.1	0.48	-0.8	-0.17	-0.25	-0.27	-0.1	-0.48	1.26	0.35	0.21	0.45	-0.07	-0.1975	0.645	0.853172	0.543991	0.114761	1	0.999631	0.579186
A0A571BDA2_S971s_1	-1.42	-1.18	-0.14	-0.88	-1.39	-1.14	-0.63	-0.95	-1.55	-1.45	-1.21	-1.02	0.16	-0.83	-0.91	0.02	-0.1225	-0.4025	0.515	0.727065	0.260248	0.229408	1	0.999631	0.679851
A0A571BEK8_S23s_1	2.24	-0.95	1.01	2.3	1.42	0.97	2.27	1.42	-0.95	0.34	1.73	-0.98	-2.52	-0.59	-0.53	0.19	0.37	-1.115	-2.0125	0.606246	0.218925	0.0336239	1	0.999631	0.443263
A0A571BGD8_S21s_1	-0.24	-0.44	-0.33	-0.86	1.9	0.15	-0.25	-0.73	0.09	0.92	0.62	1.23	-0.37	-0.16	-0.42	-0.04	0.735	1.1825	0.22	0.196479	0.00498849	0.450924	1	0.999631	0.787797
A0A5F8MPK1_S6s_1	1.52	-0.21	-0.71	0.2	0.43	0.97	0.55	0.79	-0.33	0.64	0.53	-0.22	-0.44	0.61	0.31	0.35	0.485	-0.045	0.0075	0.315689	0.929519	0.988126	1	0.999631	0.995409
A0A5F8MQ17_S313s_1	-0.12	0.7	0.54	0.29	0.38	0.21	-0.38	-0.38	0.34	0.35	-0.07	0.62	0.89	0.8	0.49	0.85	-0.395	-0.0425	0.405	0.231383	0.888232	0.2013	1	0.999631	0.658952
A0A5F8MQ82_S377s_1	-0.09	-0.22	-0.67	0.46	-0.15	-0.5	-0.66	0.31	0.19	-0.06	-0.54	-0.38	-1.03	-0.02	0.37	0.22	-0.12	-0.0675	0.015	0.730478	0.839814	0.970821	1	0.999631	0.989618
A0A5H1ZRL1_S6s_1	0.18	1.78	0.91	-2.3	1.99	2.11	-0.26	0.68	1.45	0.56	0.73	1.03	2.47	2.4	-0.15	-0.36	0.9875	0.8	0.9475	0.28955	0.32445	0.355712	1	0.999631	0.74034
A0A6I8MWZ7_S543s_1	0.54	-0.11	0.09	0.01	0.27	0.25	0.1	0.86	-0.18	0.36	0.76	0.21	0.53	0.21	0.84	0.96	0.2375	0.155	0.5025	0.422212	0.618176	0.130787	1	0.999631	0.602177
A0A7N9VR94_S286s_1	0.94	0.98	-0.31	-1.03	-0.01	0.35	-0.11	-0.44	1.08	-0.24	0.76	0.41	1.97	-0.19	0.2	-1.12	-0.1975	0.3575	0.07	0.687622	0.505858	0.922355	1	0.999631	0.975032
A0A7N9VR94_S3383s_1	0.55	0.97	-0.88	0.19	0.71	-0.28	0.37	0.28	0.28	1.3	0.35	-0.5	0.17	0.51	0.26	-0.16	0.0625	0.15	-0.0125	0.885901	0.769169	0.976712	1	0.999631	0.992016
A0A7N9VR94_S55s_1	-0.92	-0.73	-0.61	-0.56	-0.5	0.62	-0.71	-0.27	0.31	0.64	-0.51	-0.53	0.39	0.74	0.44	0.22	0.49	0.6825	1.1525	0.17078	0.0732959	0.00188466	1	0.999631	0.351308
A230065H16Rik_G3UW55_S11s_1	-0.26	0.3	0.35	-0.05	0	0.5	-0.39	-0.09	0.06	1.07	0.79	-0.03	0.53	-0.53	-0.09	0.22	-0.08	0.3875	-0.0525	0.789319	0.281152	0.87612	1	0.999631	0.961046
A2AG58-2_A2AG58_S205s_1	-0.31	0.05	-0.83	-0.63	0.06	-0.28	-0.78	-1.73	-0.17	0.43	-0.34	-0.46	-0.22	-0.26	0.31	-0.09	-0.2525	0.295	0.365	0.558179	0.380011	0.267064	1	0.999631	0.695712
A830010M20Rik_Q3TEG0_T427t_1	0.01	-0.23	-0.06	0.17	-0.73	-0.23	-0.26	-0.11	-0.57	0.39	0.25	0.27	-0.19	-0.58	-0.19	0.65	-0.305	0.1125	-0.05	0.261418	0.714226	0.882596	1	0.999631	0.963505
Aagab_Q8R2R3_S211s_1	-0.26	-0.77	-0.4	0.19	-1.86	-0.88	-0.13	-1.13	-2.4	0.38	-0.67	0.5	-1.46	-1.08	-0.09	0.1	-0.69	-0.2375	-0.3225	0.116222	0.707963	0.463446	1	0.999631	0.793615
Aak1_Q3UHJ0_S18s_1	-0.29	0.4	-0.52	-1.03	0.13	-0.59	-0.73	-0.88	-0.44	-0.5	-0.95	-0.32	0.43	0	-0.73	-1.15	-0.1575	-0.1925	-0.0025	0.682502	0.595782	0.995643	1	0.999631	0.997705
Aak1_Q3UHJ0_S21s_1	0.11	0.39	-0.47	-0.88	-0.2	0.33	-0.68	-0.29	0.06	-0.67	-0.31	-0.5	1.15	0.28	-0.98	-0.83	0.0025	-0.1425	0.1175	0.994622	0.692772	0.827669	1	0.999631	0.941202
Aak1_Q3UHJ0_S621s_2	0.13	-0.15	-0.31	-0.09	0.48	0.06	-0.22	-0.05	-0.36	0.27	-0.56	-0.52	-0.16	-0.12	-0.43	0.18	0.1725	-0.1875	-0.0275	0.525287	0.528679	0.922834	1	0.999631	0.975032
Aak1_Q3UHJ0_S622s_1	-0.16	0.11	-0.36	-0.07	-0.89	-1.82	-0.88	-0.61	-0.24	0.2	-0.56	-0.34	0.78	-0.11	-0.35	-0.67	-0.93	-0.115	0.0325	0.0164266	0.684621	0.92985	1	0.999631	0.97754
Aak1_Q3UHJ0_S622s_2	0.12	0.16	-0.04	-0.15	0.19	0.07	-0.21	0.07	-0.05	-0.08	-0.42	-0.07	-0.17	0.39	0.05	0.2	0.0075	-0.1775	0.095	0.975462	0.489149	0.73357	1	0.999631	0.907462
Aak1_Q3UHJ0_S635s_1	1.3	-0.87	-1.26	0.9	1.66	0.69	0.87	0.88	-0.24	-0.39	-0.39	-0.53	-1.92	-0.14	-0.47	-0.74	1.0075	-0.405	-0.835	0.120851	0.493617	0.228017	1	0.999631	0.679038
Aak1_Q3UHJ0_S650s_1	1.69	0.02	-0.43	1.83	2.4	1.43	1.86	2.07	1.17	-0.01	1.59	0.66	-1.42	1.26	0.93	0.43	1.1625	0.075	-0.4775	0.0606416	0.901997	0.51839	1	0.999631	0.819449
Aak1_Q3UHJ0_S668s_1	2.19	0.7	0.78	1.27	0.97	0.99	1.42	1.18	0.72	0.89	0.2	-0.79	-1.56	0.24	0.42	-0.58	-0.095	-0.98	-1.605	0.799841	0.068412	0.0123208	1	0.999631	0.385092
Aak1_Q3UHJ0_S668s_2	3.14	0.52	0.64	2.24	1.83	1.15	2.57	1.28	1.32	1.87	0.27	-0.14	-1.85	0.35	0.69	-0.42	0.0725	-0.805	-1.9425	0.909613	0.267569	0.0249141	1	0.999631	0.418003
Aak1_Q3UHJ0_S676s_1	0.98	0.1	0.56	0.55	0.07	0.53	0.98	-0.04	0.62	0.67	-0.51	-0.71	-0.78	-0.66	-0.15	-0.69	-0.1625	-0.53	-1.1175	0.62834	0.219236	0.00512409	1	0.999631	0.351308
Aak1_Q3UHJ0_S676s_2	3.33	-0.71	-0.06	1.42	1.56	0.53	2.1	0.57	0.56	0.72	-0.3	-0.62	-2.29	-0.63	-0.22	-0.63	0.195	-0.905	-1.9375	0.818338	0.293287	0.0471758	1	0.999631	0.480102
Aak1_Q3UHJ0_S680s_1	-0.2	-0.46	-1.2	-0.86	0.39	-0.12	-0.28	-0.64	-0.42	-1.42	-0.58	-0.86	-1	-0.18	-1.32	-0.6	0.5175	-0.14	-0.095	0.152817	0.690362	0.798781	1	0.999631	0.93091
Aak1_Q3UHJ0_S729s_1	-0.05	-0.06	-0.2	0.2	0.52	-0.02	0	0.29	-0.1	-0.85	0.01	-0.16	-0.38	0.11	-0.07	0.17	0.225	-0.2475	-0.015	0.395225	0.408718	0.957552	1	0.999631	0.98529
Aak1_Q3UHJ0_S795s_1	1.71	0.47	-0.88	1.97	2.22	1.29	1.82	1.65	0.89	-0.41	0.79	0.1	-1.77	1.4	0.21	1.16	0.9275	-0.475	-0.5675	0.154156	0.470756	0.505995	1	0.999631	0.814836
Aak1_Q3UHJ0_S848s_1	0.72	-0.48	-1.17	0.92	1.16	-0.96	0.35	-0.54	-0.12	-1.58	-0.26	-1.23	0.1	-0.44	-1.15	-0.93	0.005	-0.795	-0.6025	0.993528	0.181523	0.275102	1	0.999631	0.700187
Aak1_Q3UHJ0_S936s_1	-1.23	-0.6	-0.43	-0.53	-0.31	-1.01	-0.38	-0.6	-0.33	-1.53	-0.02	0	0.14	-1.04	-0.73	-0.52	0.1225	0.2275	0.16	0.685816	0.583153	0.657332	1	0.999631	0.879224
Aak1_Q3UHJ0_T604t_1	-0.07	0.19	0.03	-0.18	-0.05	0.11	-0.58	0.17	0.22	0.13	0.08	-0.09	0.57	0.51	0.15	0.25	-0.08	0.0925	0.3775	0.771272	0.711916	0.190555	1	0.999631	0.648674
Aak1_Q3UHJ0_T618t_1	-1.23	-0.69	0.18	-1.46	-1.91	-1.38	-1.71	-1.55	-1.43	-0.58	-0.98	-0.59	0.86	-0.61	-0.89	-0.57	-0.8375	-0.095	0.4975	0.0543109	0.82105	0.341613	1	0.999631	0.73317
Aak1_Q3UHJ0_T618t_2	0.12	0.09	-0.12	-0.13	0.26	0.07	-0.22	0.03	-0.12	0	-0.46	-0.2	-0.17	0.28	-0.08	0.19	0.045	-0.185	0.065	0.85523	0.47365	0.812902	1	0.999631	0.937041
Aak1_Q3UHJ0_T672t_2	3.47	-2.08	-0.28	0.51	1.45	0.15	1.77	-0.22	-0.43	-0.82	-0.33	-1.36	-2.02	-1.48	-1.12	-0.53	0.3825	-1.14	-1.6925	0.722692	0.278741	0.122071	1	0.999631	0.590723
Aak1_Q3UHJ0_T679t_1	-0.2	-0.46	-1.2	-0.86	0.39	-0.12	-0.28	-0.64	-0.42	-1.42	-0.58	-0.86	-1	-0.18	-1.32	-0.6	0.5175	-0.14	-0.095	0.152817	0.690362	0.798781	1	0.999631	0.93091
Aatk_B1AZF9_S662s_1	-1.96	4.09	3.49	0.47	1.88	3.44	1.12	1.89	3.39	0.4	2.69	3.86	4.34	3.29	2.69	2.34	0.56	1.0625	1.6425	0.659941	0.443588	0.206608	1	0.999631	0.6605
Aatk_B1AZF9_S670s_1	0	-0.18	-0.54	0.61	0.32	-0.42	0.32	-0.93	-0.27	0.31	-1.1	-1.6	0.11	0.78	0.08	0.79	-0.15	-0.6375	0.4675	0.70515	0.197556	0.214886	1	0.999631	0.667764
Aatk_B1AZF9_S987s_1	0.25	-0.5	-0.38	-0.29	-0.29	-0.47	-0.13	0.04	-0.41	-0.11	-0.31	-0.71	-0.29	0.36	-0.47	-0.44	0.0175	-0.155	0.02	0.950105	0.597925	0.951565	1	0.999631	0.984079
Abca2_P41234_S2381s_1	-2.29	-0.71	0.55	0.09	-0.95	-0.82	0.02	0.7	0.43	-0.97	-0.07	1.07	0.82	-0.12	0.31	1.14	0.3275	0.705	1.1275	0.618916	0.312089	0.0926342	1	0.999631	0.557279
Abcb1a_P21447_S667s_1	0.88	1.27	1.2	1.07	1.24	1.53	0.86	0.4	2.14	2.39	0.63	1.5	0.79	0.68	1.07	0.71	-0.0975	0.56	-0.2925	0.755517	0.193152	0.299252	1	0.999631	0.712604
Abcc4_E9Q236_T561t_1	-0.34	0.35	-0.45	-0.36	-0.31	-0.45	-0.75	-1.19	-0.32	0.23	-1.18	-0.27	0.73	-0.4	-0.4	-0.32	-0.475	-0.185	0.1025	0.158284	0.621524	0.783918	1	0.999631	0.922628
Abcd2_Q61285_S58s_1	-0.26	-1.56	-0.54	-0.62	-0.94	-0.54	-0.53	-1.06	-0.28	0.2	-0.57	-0.49	-0.35	-1.49	-0.73	-1.13	-0.0225	0.46	-0.18	0.948042	0.22412	0.653869	1	0.999631	0.878409
Abcd3_P55096_S424s_1	-1.09	-1.07	-0.88	-1.61	-0.75	-1.41	-1.31	-1.64	0.02	-0.36	-0.81	-0.57	-0.19	-0.43	-0.23	-0.77	-0.115	0.7325	0.7575	0.706716	0.0358539	0.0300972	1	0.999631	0.436111
Abcf1_Q6P542_S194s_1	-1.44	0.43	0.31	0.57	0.34	0.2	-0.3	0.29	0.35	0.26	0.46	-0.58	0.47	0.16	0.41	-1.29	0.165	0.155	-0.03	0.726834	0.757537	0.958542	1	0.999631	0.98564
Abhd17b_Q7M759_S282s_1	-0.71	-0.28	0.44	0	-0.26	-0.83	-0.76	0.04	-0.52	-0.22	-0.48	0.82	0.66	-0.14	-0.11	1.08	-0.315	0.0375	0.51	0.376562	0.926318	0.227625	1	0.999631	0.678949
Abi1_B7ZCU4_S183s_1	-0.16	-0.22	-0.02	-0.54	-0.58	-0.55	-0.74	-0.42	-0.27	0.1	-0.33	-0.16	0.47	-0.03	-0.15	-0.06	-0.3375	0.07	0.2925	0.197475	0.791337	0.330867	1	0.999631	0.727302
Abi1_B7ZCU4_S222s_1	2.98	0.19	-0.76	1.37	2.53	2.67	2.27	1.69	1.9	0.47	1.18	0.1	-1.2	0.25	1.15	-0.56	1.345	-0.0325	-1.035	0.0921142	0.967161	0.229835	1	0.999631	0.680524
Abi1_B7ZCU4_S225s_1	2.1	-1.51	-0.24	1.61	0.33	-0.33	1.25	0.52	-0.51	0.32	0.14	-0.56	-1.43	-1.3	-0.33	-0.92	-0.0475	-0.6425	-1.485	0.951663	0.408621	0.0756668	1	0.999631	0.541044
Abi1_B7ZCU4_S231s_1	3.1	0.8	0.39	1.52	2.52	2.77	2.23	1.72	1.94	1.3	1.17	0.67	-1.17	1.22	1.25	0.88	0.8575	-0.1825	-0.9075	0.162197	0.759276	0.233357	1	0.999631	0.683077
Abi2_A0A087WRS3_S191s_1	0.11	1.48	-3.03	-1.91	-1.03	-1.89	-0.32	-3.2	-0.98	0.6	-3.69	-3.6	-1.05	-1.31	-3.94	-4.95	-0.7725	-1.08	-1.975	0.45479	0.394943	0.119269	1	0.999631	0.586867
Abi2_A0A087WRS3_S195s_1	1.02	-2.21	-2.33	-1.05	-3.49	-1.64	0.07	-2.22	-2.83	1.73	-2.47	-2.89	-2.46	-2.08	-2.15	-1.77	-0.6775	-0.4725	-0.9725	0.470736	0.686728	0.185871	1	0.999631	0.646224
Abi2_Q6AXH6_S183s_1	-1.01	-0.84	-0.47	-0.78	-1.04	-1.13	-1.05	-0.81	-1.05	-0.42	-0.91	-0.36	-0.18	-0.9	-0.53	-0.34	-0.2325	0.09	0.2875	0.365563	0.757823	0.34779	1	0.999631	0.736498
Abi2_Q6AXH6_S216s_1	1.58	-1.41	-1.5	0.82	1.53	0.2	1.33	1.31	-0.37	-0.66	-0.17	-1.69	-2.79	-0.39	-1.11	-0.75	1.22	-0.595	-1.1325	0.122816	0.436749	0.189115	1	0.999631	0.648556
Abi2_Q6AXH6_S227s_1	0.85	0.65	0.64	0.44	0.5	0.51	0.51	1.03	0.86	0.84	0.53	0.2	0.12	0.73	0.35	0.74	-0.0075	-0.0375	-0.16	0.976991	0.892353	0.585656	1	0.999631	0.849524
Abl1_P00520_S709s_1	0.68	1.29	0.09	1.4	0.49	0.87	1.15	1.7	1.24	1.55	0.64	0.67	-0.45	0.06	1.46	0.1	0.1875	0.16	-0.5725	0.641108	0.684481	0.259838	1	0.999631	0.692624
Abl1_P00520_S713s_1	2.88	-0.67	0.88	1.46	0.4	0.87	2.04	1.22	0.43	1.5	1.18	0.04	-1.9	0.06	0.47	-0.21	-0.005	-0.35	-1.5325	0.994427	0.627397	0.075152	1	0.999631	0.541044
Abl1_P00520_S903s_1	-0.59	-0.3	-2.25	-3.08	-0.8	-2.01	-1.95	-2.57	-0.17	-0.07	-2.29	-2.13	-0.67	-0.06	-2.69	-2.56	-0.2775	0.39	0.06	0.683034	0.623691	0.941478	1	0.999631	0.981286
Abl1_P00520_Y179y_1	0.29	0.78	0.42	-0.51	-0.45	0.26	-0.21	-0.09	0.26	0.8	-0.71	-0.26	0.3	-0.02	-0.55	-0.04	-0.3675	-0.2225	-0.3225	0.298718	0.603848	0.390455	1	0.999631	0.758901
Abl2_F8VQH0_S632s_1	0.08	-0.2	-0.28	0.3	-0.06	0.66	0.12	0.89	-0.12	-0.59	0.06	0.16	-1.12	0.03	-0.45	0.21	0.4275	-0.0975	-0.3075	0.19304	0.741154	0.413198	1	0.999631	0.768474
Abl2_F8VQH0_S785s_1	-0.94	-0.22	-0.13	0.59	-0.62	-0.48	0.93	0.46	0.34	0.1	0.64	-0.57	-0.5	-0.73	0.21	0.9	0.2475	0.3025	0.145	0.597544	0.469259	0.759457	1	0.999631	0.914614
Abl2_F8VQH0_S819s_1	0.82	-0.38	0.04	1.45	-0.25	-0.47	1.83	0.57	-0.41	0.57	1.54	0.97	-0.93	-0.25	-0.44	1.55	-0.0625	0.185	-0.5	0.916641	0.731803	0.423925	1	0.999631	0.773835
Abl2_F8VQH0_S822s_1	0.25	0.48	-0.67	0.31	0.56	0.01	0.32	0.02	0.03	0.69	0.49	0.65	-0.14	0.42	-0.43	0.2	0.135	0.3725	-0.08	0.684706	0.292852	0.826793	1	0.999631	0.940834
Abl2_F8VQH0_S936s_1	0.8	-0.27	-2.57	0.76	1.33	0.63	1.16	0.12	0.76	-0.19	-0.28	-1.39	-0.96	0.55	-0.91	0.27	1.13	0.045	0.0575	0.148329	0.954769	0.940576	1	0.999631	0.981146
Abl2_F8VQH0_Y439y_1	-1.04	-1.18	-1.73	-0.97	-0.77	-0.55	-0.83	-1.1	-1.01	-1.57	-1.27	-0.79	-0.56	-1.05	-1.02	-2.96	0.4175	0.07	-0.1675	0.163987	0.820959	0.751158	1	0.999631	0.912766
Ablim1_E9Q9C4_S304s_1	0.95	0.22	-0.54	1.73	0.59	0.51	0.89	1.75	0.19	0.8	0.81	0.11	-1.32	0.06	-0.02	1.57	0.345	-0.1125	-0.5175	0.513993	0.820864	0.454453	1	0.999631	0.789715
Ablim1_E9Q9C4_S319s_1	-0.6	-1.97	-0.77	-0.29	-0.52	-0.77	-0.19	-0.35	-0.99	-1.43	-1.56	-1.3	-1.5	-0.88	-0.34	-0.43	0.45	-0.4125	0.12	0.270765	0.316155	0.790696	1	0.999631	0.926419
Ablim1_E9Q9C4_S319s_2	-0.38	-2.2	-2.16	-2.82	-0.86	-2.08	-1.69	-2.22	-1.78	-0.64	-2.85	-2.72	-0.58	-1.82	-4.28	-3.81	0.1775	-0.1075	-0.7325	0.750256	0.870259	0.410683	1	0.999631	0.767937
Ablim1_E9Q9C4_S378s_1	-0.32	-0.33	0.42	0.11	0.16	-0.07	0.8	-0.35	0.4	-0.42	0.21	0.11	-0.61	-0.82	-0.36	-0.85	0.165	0.105	-0.63	0.629562	0.740004	0.064474	1	0.999631	0.514485
Ablim1_E9Q9C4_S383s_1	-0.41	-0.24	-0.82	-1.14	-0.61	-0.59	-1.09	-0.73	-0.68	-0.29	-0.97	-0.51	1.02	-0.55	-0.95	0.02	-0.1025	0.04	0.5375	0.731761	0.898398	0.264586	1	0.999631	0.6935
Ablim1_E9Q9C4_S387s_1	-1.02	-0.56	0.5	0.44	0.61	-2.68	-0.64	0.22	-1.4	-2.17	-1.44	-0.85	1.05	0.1	-0.35	-0.45	-0.4625	-1.305	0.2475	0.528764	0.0158694	0.615802	1	0.999631	0.861203
Ablim1_E9Q9C4_S404s_1	0.66	0.36	-0.37	0.89	1.18	0.64	0.38	0.63	0.65	0.67	0.06	0.62	0.5	0.73	-0.03	0.02	0.3225	0.115	-0.08	0.368543	0.743124	0.829916	1	0.999631	0.942187
Ablim1_E9Q9C4_S407s_1	-0.98	0.51	-0.5	-0.24	0.04	-0.24	-0.61	-0.98	0.5	0.02	-0.62	-0.24	-0.16	-0.22	-0.45	-0.38	-0.145	0.2175	-4.90654e-17	0.711351	0.590941	1	1	0.999631	1
Ablim1_E9Q9C4_S410s_1	-0.78	-0.87	-0.17	0.6	-1.03	-0.4	-0.64	0.14	-0.2	-0.62	0.17	-0.18	0.09	0.25	-1.15	-0.47	-0.1775	0.0975	-0.015	0.670897	0.803771	0.973914	1	0.999631	0.990749
Ablim1_E9Q9C4_S425s_1	0.82	-0.68	-1.08	-0.12	-0.24	-0.05	0.46	-0.23	-1.09	0.01	-0.59	-1.07	-1.35	-0.65	-0.64	-0.36	0.25	-0.42	-0.485	0.567661	0.381789	0.303733	1	0.999631	0.715879
Ablim1_E9Q9C4_S442s_1	0.58	1.32	0.37	0.83	1.11	2.17	0.74	1.08	1.29	1.07	0.99	0.25	0.34	1.47	0.62	1.25	0.5	0.125	0.145	0.212092	0.718828	0.699388	1	0.999631	0.896612
Ablim1_E9Q9C4_S491s_1	-0.74	-0.11	-0.04	0.1	-0.13	0.1	-0.19	0.28	-0.73	-0.05	-0.61	0	-0.53	-0.35	-0.16	-0.23	0.2125	-0.15	-0.12	0.467616	0.643484	0.693999	1	0.999631	0.895131
Ablim1_E9Q9C4_S492s_1	-1.08	-0.22	-0.84	-0.61	0	-0.43	-0.67	-0.54	-0.04	-0.67	-1.15	-0.41	0.19	-0.2	-1.01	-1.28	0.2775	0.12	0.1125	0.363113	0.725782	0.783223	1	0.999631	0.922628
Ablim1_E9Q9C4_S544s_1	-0.36	-0.38	-0.37	-0.39	-0.19	1.35	0.93	-0.13	0.19	-0.7	0.19	0.07	-1.12	0.2	0.2	-0.19	0.865	0.3125	0.1475	0.0494042	0.304292	0.683785	1	0.999631	0.889602
Ablim1_E9Q9C4_S559s_1	0.46	0.92	0.22	0.18	0.67	1.54	0.04	0.24	1.13	0.84	0.12	0.42	-0.06	1.41	0.11	0.49	0.1775	0.1825	0.0425	0.646402	0.585128	0.914528	1	0.999631	0.972695
Ablim1_E9Q9C4_S573s_1	-1.02	1.03	0.36	-0.3	1.03	1.14	0.76	1.76	1.6	0.08	1.43	1.97	1.61	1.18	0.83	0.81	1.155	1.2525	1.09	0.0311332	0.0459389	0.0397592	1	0.999631	0.471305
Ablim1_E9Q9C4_S610s_1	0.77	0.46	0.76	1.68	0.85	1	1	1.68	0.48	0.54	1.18	0.92	-0.48	1.42	1.05	1.43	0.215	-0.1375	-0.0625	0.544633	0.695815	0.900865	1	0.999631	0.968153
Ablim1_E9Q9C4_T303t_1	0.1	0.58	0.2	0.39	0.15	0.73	-0.05	0.12	0.02	0.56	0.43	0.68	0.35	0.45	0.04	-0.01	-0.08	0.105	-0.11	0.776095	0.706654	0.699847	1	0.999631	0.896612
Ablim2_E9Q0W6_S313s_1	-2.45	-0.54	-0.63	-2.03	-1.21	-1.23	-1.61	-1.75	-1.2	-1.97	-1.38	-1.01	0.57	-1.19	-1.07	-1.74	-0.0375	0.0225	0.555	0.937471	0.964137	0.386527	1	0.999631	0.756141
Ablim2_E9Q0W6_S366s_1	1.66	0.28	2.17	1.4	-0.04	0.99	1.89	0.26	0.57	2.48	0.71	0.57	-1.02	-0.66	0.81	-0.73	-0.6025	-0.295	-1.7775	0.280763	0.604691	0.0074759	1	0.999631	0.358173
Ablim2_E9Q0W6_S402s_1	1.69	-0.87	-0.06	0.45	-0.96	-0.34	0.72	-0.84	-1.27	1.15	-0.88	-1.47	-1.52	-1.58	-2.19	-2.13	-0.6575	-0.92	-2.1575	0.285513	0.218585	0.00223051	1	0.999631	0.351308
Ablim2_E9Q0W6_S457s_1	-0.63	-2.46	0.24	0	-2.33	-1.68	-0.86	-0.59	-2.32	-0.47	-1.17	-1.14	-0.77	-1.7	-0.49	-0.42	-0.6525	-0.5625	-0.1325	0.328562	0.395599	0.829465	1	0.999631	0.942058
Ablim2_E9Q0W6_S486s_1	-1.02	0.32	-0.97	-0.95	1.39	-0.07	-0.6	-0.79	0.46	-1.29	-0.74	-0.1	0.08	0.18	-0.3	-1.23	0.6375	0.2375	0.3375	0.258141	0.623138	0.463849	1	0.999631	0.793747
Ablim2_E9Q0W6_S487s_1	-1.02	0.32	0.27	0.57	1.39	-0.07	0.52	0.63	0.46	-1.29	-0.13	0.6	0.08	0.18	0.26	1.03	0.5825	-0.125	0.3525	0.216208	0.811669	0.418344	1	0.999631	0.771707
Ablim2_E9Q0W6_S511s_1	-0.51	0.36	-0.23	-0.65	0.15	0.19	-0.76	-0.45	-0.04	-0.07	-0.73	-0.22	0.53	0.38	-0.57	-0.21	0.04	-0.0075	0.29	0.90929	0.981762	0.449868	1	0.999631	0.78723
Ablim2_E9Q0W6_T397t_1	-0.25	-2.07	-1.58	-1.32	-2.65	-2.3	-0.8	-1.12	-2.67	-1.09	-1.35	-1.34	-2.89	-2.05	-0.87	-1.49	-0.4125	-0.3075	-0.52	0.454486	0.541384	0.346407	1	0.999631	0.735175
Ablim3_Q69ZX8_S282s_1	-1.75	-0.71	-0.96	-1.76	-0.9	-1.13	0.37	-1.42	-0.2	-2.18	-0.01	0.57	1.26	-1.33	-1.06	-0.99	0.525	0.84	0.765	0.269518	0.182283	0.221867	1	0.999631	0.672466
Ablim3_Q69ZX8_S337s_1	-0.24	-1.17	-0.51	-0.44	-0.79	-0.7	-0.6	-0.09	-0.73	-0.19	-0.1	-0.19	-0.54	-0.44	0.05	-0.19	0.045	0.2875	0.31	0.88466	0.369074	0.347705	1	0.999631	0.736498
Ablim3_Q69ZX8_S372s_1	0.86	0.61	0.25	0.25	0.47	0.67	0.4	0.28	0.33	0.22	0.09	1	1.38	0.61	1.12	0.62	-0.0375	-0.0825	0.44	0.888079	0.793651	0.193437	1	0.999631	0.650087
Ablim3_Q69ZX8_S373s_1	0.73	0.13	-0.96	-0.35	0.05	0.06	-0.59	0.18	0.22	-0.91	-0.84	-1.19	-0.6	0	-0.17	-0.92	0.0375	-0.5675	-0.31	0.92564	0.236761	0.472294	1	0.999631	0.79887
Ablim3_Q69ZX8_S408s_1	-0.15	-1.54	-1.13	-0.11	-0.36	0.08	-0.97	-0.58	0.05	0.06	-1.35	-1.23	-0.82	-0.28	-0.03	0.01	0.275	0.115	0.4525	0.514182	0.818606	0.295166	1	0.999631	0.708769
Ablim3_Q69ZX8_S502s_1	-0.57	-0.77	-0.76	-0.51	-0.04	-0.5	-0.86	-0.48	-0.42	0.34	-0.37	0.02	-0.35	-0.47	-0.62	-0.46	0.1825	0.545	0.1775	0.506154	0.0791024	0.505924	1	0.999631	0.814836
Ablim3_Q69ZX8_T542t_1	-2.2	-0.27	-1.06	-0.83	0.91	0.26	-0.83	-2.02	-0.18	-0.61	-1.01	-0.67	1.27	0.94	-0.74	-0.58	0.67	0.4725	1.3125	0.333875	0.294111	0.0495801	1	0.999631	0.487521
Abr_Q5SSL4_S53s_1	0.22	-0.25	-0.55	-0.8	0.33	0.42	-0.95	-0.73	-0.29	-0.53	-0.67	-0.43	0.62	0.15	-0.64	-0.28	0.1125	-0.135	0.3075	0.786369	0.659766	0.430518	1	0.999631	0.778235
Abr_Q5SSL4_S72s_1	-1.04	-0.43	-0.22	-1.47	0.03	-0.69	0.28	-1.36	-0.32	-1.76	0.12	-0.81	-0.77	-0.94	-0.9	-1.86	0.355	0.0975	-0.3275	0.439361	0.837678	0.423872	1	0.999631	0.773835
Abr_Q5SSL4_T294t_1	-1.28	-4.43	-0.78	-0.73	-3.58	-3.67	0.05	-2	-4.04	-2.5	-0.83	-0.71	-3.76	-3.35	-1.04	-1.4	-0.495	-0.215	-0.5825	0.643737	0.833273	0.546874	1	0.999631	0.834213
Acap2_D4AFX6_S386s_1	0.24	0.12	0.11	-0.6	-1.08	0.55	0.29	-0.21	0.71	1.41	-0.1	-0.11	1.11	1.12	0.41	0.75	-0.08	0.51	0.88	0.844502	0.240002	0.0219306	1	0.999631	0.405544
Acap2_D4AFX6_S388s_2	0.06	0.6	0.29	0.57	0.2	0.34	-0.05	-0.59	0.24	0.91	0.78	0.53	-0.53	0.32	0.4	-0.64	-0.405	0.235	-0.4925	0.201191	0.419307	0.186915	1	0.999631	0.646474
Acap2_D4AFX6_S391s_1	-0.37	-0.25	0.19	-0.06	-0.98	0.1	-0.5	-0.7	-0.09	-0.64	-0.06	-0.2	-0.18	-0.76	-0.06	-0.41	-0.3975	-0.125	-0.23	0.223015	0.656195	0.451813	1	0.999631	0.788148
Acap2_D4AFX6_S391s_2	-0.34	-0.24	0.29	0.57	0.55	0.06	-0.05	-0.59	-0.47	0.44	0.78	0.53	-2.37	0.06	0.4	-0.64	-0.0775	0.25	-0.7075	0.824234	0.508721	0.252745	1	0.999631	0.688432
Acap2_D4AFX6_S528s_1	-0.84	0.48	-1.68	-2.18	0.32	0.07	-1.74	-2.43	0.06	-0.4	-1.45	-1.49	0.88	0.42	-1.57	-1.54	0.11	0.235	0.6025	0.887772	0.710447	0.4357	1	0.999631	0.780324
Acap2_D4AFX6_S559s_1	-0.16	-0.51	0.16	2.03	2.88	-0.05	2.56	1.46	1.33	-2.19	2.48	2.19	-1.76	-0.49	-0.59	0.37	1.3325	0.5725	-0.9975	0.106068	0.587443	0.144532	1	0.999631	0.616037
Acap2_D4AFX6_S562s_1	0.83	0.49	-0.48	-0.34	-0.29	0.16	0.24	-0.83	-0.4	0.6	-0.77	-0.65	-1.71	-0.97	-2.7	-0.75	-0.305	-0.43	-1.6575	0.457508	0.340948	0.00872018	1	0.999631	0.365244
Acap2_D4AFX6_S568s_1	0.15	-0.13	0.28	0.78	1.55	0.89	1.95	0.65	0.99	-0.59	0.68	0.99	-1.3	-1.05	-0.45	-0.92	0.99	0.2475	-1.2	0.0225938	0.562517	0.00452156	1	0.999631	0.351308
Acap2_D4AFX6_S580s_1	-0.57	0.41	1.43	1.01	-0.61	0.17	0.03	1.38	0.41	-0.68	0.99	-1.05	-0.02	0.87	1.93	-1.51	-0.3275	-0.6525	-0.2525	0.555891	0.282228	0.735231	1	0.999631	0.90759
Acap3_Q6NXL5_S383s_1	0.38	-0.02	0.2	0.33	-0.02	0.32	0.16	0.53	0.6	1	0.84	0.45	1	0.63	0.57	0.82	0.025	0.5	0.5325	0.922444	0.0855189	0.0777179	1	0.999631	0.543121
Acap3_Q6NXL5_S383s_2	-0.6	-0.23	-0.3	-0.52	-0.63	0.73	0.06	0.12	0.74	0.75	0.37	0.28	0.09	0.48	0.22	0.34	0.4825	0.9475	0.695	0.16854	0.00515239	0.0270214	1	0.999631	0.422893
Acap3_Q6NXL5_S388s_1	-0.48	1.01	1.16	0.18	0.02	0.71	-0.1	-0.51	0.52	0.87	0.28	0.05	0.75	0.76	1.07	1.12	-0.4375	-0.0375	0.4575	0.337908	0.929282	0.282463	1	0.999631	0.70392
Acin1_F6RJ39_S414s_1	0.9	0.67	0.98	0.2	0.84	0.43	0.33	-0.69	1.12	1.19	0.97	2.05	1.82	0.48	2.11	1.38	-0.46	0.645	0.76	0.246352	0.0850192	0.0902026	1	0.999631	0.557085
Acin1_F6RJ39_S425s_1	-0.27	0.44	-0.12	0.07	0.51	0.05	-0.42	0.15	0.27	0.42	-0.29	-0.16	0.98	0.58	-0.16	0.12	0.0425	0.03	0.35	0.889038	0.92097	0.331208	1	0.999631	0.727302
Acin1_F6RJ39_S437s_1	2.54	-2.36	-0.19	-0.35	-2.7	-0.62	2.87	-2.41	-5.6	2.41	-1.61	-1.93	-3	-3.45	-1.98	-2.91	-0.625	-1.5925	-2.745	0.653023	0.341089	0.0120102	1	0.999631	0.385092
Acin1_F6RJ39_S541s_1	-0.52	0.41	0.21	-0.79	0.39	-0.7	-0.93	-0.01	-0.26	0.44	-0.54	-0.24	1.01	-0.02	-1.98	-0.67	-0.14	0.0225	-0.2425	0.737153	0.95248	0.697941	1	0.999631	0.895731
Acin1_F6RJ39_S601s_1	0.65	1.02	1.08	0.98	0	0.52	0.38	0.24	-0.6	1.38	1.38	0.2	0.33	0.76	1.18	1.83	-0.6475	-0.3425	0.0925	0.0287466	0.477488	0.804833	1	0.999631	0.934231
Acin1_F6RJ39_S603s_1	0.5	0.48	0.6	0.42	0.2	0.34	0.11	-0.16	0.57	0.94	0.53	0.26	1.15	0.43	0.34	-0.02	-0.3775	0.075	-0.025	0.145863	0.776672	0.938787	1	0.999631	0.980279
Acin1_F6RJ39_S675s_1	1.59	0.34	1.29	0.6	0.68	0.69	0.91	-0.01	1.29	2.11	0.19	0.58	0.71	0.81	0.96	0.09	-0.3875	0.0875	-0.3125	0.310533	0.858204	0.422613	1	0.999631	0.773293
Acin1_F6RJ39_S784s_1	1.37	0.15	1.23	0.51	0.2	0.67	0.75	0.61	1.58	1.76	0.99	0.82	0.42	0.65	0.9	-0.21	-0.2575	0.4725	-0.375	0.464312	0.240752	0.359491	1	0.999631	0.741182
Acin1_F6RJ39_S832s_1	1.68	1.07	2.77	1.51	0.28	2.14	2.18	0.88	1.74	3.12	1.58	1.44	0.42	0.24	1.67	1.31	-0.3875	0.2125	-0.8475	0.48401	0.673581	0.104167	1	0.999631	0.568213
Acin1_F6RJ39_S923s_1	0.24	0.03	0.08	0.34	0.19	-0.07	0.78	-0.05	-0.08	0.01	0.84	0.11	-0.81	1.02	-0.47	1.25	0.04	0.0475	0.075	0.888763	0.873845	0.881048	1	0.999631	0.963364
Acin1_F6RJ39_S937s_1	0.02	-0.05	0.25	-0.17	-0.2	-0.27	-0.52	-0.15	-0.27	0.37	-0.13	0.01	0.24	0.23	0.17	0.51	-0.2975	-0.0175	0.275	0.246517	0.948572	0.323914	1	0.999631	0.724485
Acin1_Q9JIX8_S858s_1	1.84	1.28	2.79	1.46	0.38	2.36	2.15	0.87	1.94	3.36	1.49	1.45	0.47	0.32	1.59	1.32	-0.4025	0.2175	-0.9175	0.464197	0.679635	0.0673857	1	0.999631	0.521449
Acly_Q3TS02_S455s_1	1.12	0.43	0.48	1.15	0.4	1.03	1.14	0.55	1.21	1.22	0.81	0.74	-0.51	0.4	0.64	0.03	-0.015	0.2	-0.655	0.962218	0.517741	0.0967653	1	0.999631	0.55886
Acly_Q3TS02_S481s_1	0.4	0.63	0.67	0.56	0.49	0.39	0.05	0.75	0.52	0.67	0.45	1.09	0.58	1.2	0.87	1.05	-0.145	0.1175	0.36	0.581163	0.662722	0.219187	1	0.999631	0.669859
Aco2_Q99KI0_S559s_1	-0.12	-0.55	-0.16	-1.22	-0.58	-0.58	-0.12	-0.4	-0.14	0.36	-0.24	-0.13	-0.25	-0.27	-0.54	-0.33	0.0925	0.475	0.165	0.774981	0.179928	0.623271	1	0.999631	0.862913
Acot1_O55137_S416s_1	-0.28	0.82	1.54	0	0.09	-0.38	0.7	0.93	1.03	1.08	0.77	1.94	1.25	1.75	1.85	1.37	-0.185	0.685	1.035	0.701592	0.166757	0.0380403	1	0.999631	0.459475
Acot1_O55137_S56s_1	-0.14	0.84	0.35	-0.22	0.24	0.06	0.15	0.75	0.55	0.49	-0.05	0.65	1.26	0.31	0.57	0.08	0.0925	0.2025	0.3475	0.780136	0.552989	0.378722	1	0.999631	0.751637
Acot11_F6SS52_S14s_1	0.19	1.03	0.87	0.82	0.82	1.43	0.51	1.78	0.99	0.92	1.22	1.15	0.39	1.6	1.27	1.8	0.4075	0.3425	0.5375	0.278353	0.250096	0.190465	1	0.999631	0.648674
Acot11_F6SS52_S20s_1	-0.81	-1.09	0.52	-0.01	-0.18	-1.07	-1.13	-0.03	-1.02	0.04	-0.21	-0.87	-0.24	-1.02	0.14	0.38	-0.255	-0.1675	0.1625	0.575817	0.706027	0.729972	1	0.999631	0.906325
Acot7_Q91V12_S285s_1	-0.29	1.18	-0.35	-0.81	0.08	1.24	-0.14	0.53	0.78	0.24	0.44	0.88	0.24	0.47	1.2	0.46	0.495	0.6525	0.66	0.331409	0.168525	0.181715	1	0.999631	0.643861
Acot7_Q91V12_S2s_1	-0.93	-0.15	-0.16	-0.21	-0.36	-1.22	-0.35	0.29	-0.56	-1.85	-1.03	-0.15	-1.14	-0.53	0.46	-0.64	-0.0475	-0.535	-0.1	0.899917	0.218535	0.805542	1	0.999631	0.934743
Acsbg1_Q99PU5_S55s_1	0	0.57	0.07	-0.05	0.25	-0.3	-0.53	0.61	0.39	0.69	0.3	0.77	0.85	0.29	0.4	0.94	-0.14	0.39	0.4725	0.676765	0.185353	0.150094	1	0.999631	0.622782
Acsbg1_Q99PU5_S70s_1	-0.61	0.35	-0.24	-0.2	-0.11	0.86	-0.48	0.12	-0.15	-0.48	-0.2	-0.51	0.47	1.11	0.23	0.07	0.2725	-0.16	0.645	0.462775	0.593333	0.0937593	1	0.999631	0.558128
Acsl6_Q5F2C5_S364s_1	-1.41	-0.1	-0.37	-0.79	-0.52	-0.45	-1.57	-1.66	-0.23	-1.2	-0.98	-0.38	0.32	0.24	0.08	-0.09	-0.3825	-0.03	0.805	0.380646	0.938171	0.0430545	1	0.999631	0.475443
Acss2_Q9QXG4_S265s_1	0.24	0.74	0.24	-0.23	0.12	0.5	-0.32	0.02	0.42	0.23	0.14	0.25	1.15	1	-0.35	0.31	-0.1675	0.0125	0.28	0.595355	0.965743	0.504068	1	0.999631	0.814292
Acss2_Q9QXG4_S267s_1	-0.21	-0.44	0.8	-0.47	-0.53	-0.45	-0.62	-0.41	-0.24	-0.67	0.42	0.38	-0.26	-0.08	0	1.02	-0.4225	0.0525	0.25	0.230967	0.897286	0.560633	1	0.999631	0.839977
Acss2_Q9QXG4_S30s_1	-0.09	0.77	0.76	-0.03	0.14	0.57	-0.15	0.52	0.75	0.6	1.01	0.86	1.27	1.25	0.78	1.19	-0.0825	0.4525	0.77	0.804219	0.174789	0.0412287	1	0.999631	0.474979
Actb_P60710_S233s_1	0.1	0.16	0.72	-0.39	0.13	0.52	-0.57	0.12	-0.1	-0.08	-0.75	0.03	0.78	0.67	0.36	0.1	-0.0975	-0.3725	0.33	0.780938	0.28351	0.343319	1	0.999631	0.73348
Actb_P60710_S239s_1	-0.85	-0.2	-0.16	-0.46	-0.58	0.19	-0.8	-1.32	-0.08	-0.2	-2.06	-2.08	0.77	0.18	-0.02	-0.29	-0.21	-0.6875	0.5775	0.573475	0.22229	0.113776	1	0.999631	0.579001
Actb_P60710_S52s_1	-0.59	3.13	1.72	-0.76	2.67	3.3	1.96	-0.27	1.36	0.55	0.29	1.09	1.96	0.41	0.72	-2.18	1.04	-0.0525	-0.6475	0.333575	0.950638	0.555786	1	0.999631	0.838305
Actb_P60710_T203t_1	-0.35	0.15	0.04	-0.26	-0.44	-0.25	-0.67	-0.4	-0.31	-0.07	0.04	-0.02	-0.11	-0.1	-0.62	-0.73	-0.335	0.015	-0.285	0.212451	0.954457	0.360366	1	0.999631	0.741182
Actb_P60710_Y198y_1	1.43	-1.59	-0.97	-1.2	-1.78	-2.39	1.39	-1.12	-1.69	-0.69	-1.09	-0.97	-0.75	-1.78	-0.9	-1.39	-0.3925	-0.5275	-0.6225	0.673746	0.420887	0.348687	1	0.999631	0.736697
Actr3_Q99JY9_S418s_1	-0.24	1.46	1.48	-0.42	2.87	0.45	1.84	-0.65	4.27	0.11	3.26	4.1	5.01	0.67	0.33	-0.03	0.5575	2.365	0.925	0.498002	0.0307741	0.407724	1	0.999631	0.766996
Acvr2a_P27038_S184s_1	0.28	1.12	0.81	0.72	0.2	1.21	-0.01	0.16	0.16	0.48	0.71	0.28	1.39	1.4	0.23	0.85	-0.3425	-0.325	0.235	0.345267	0.28398	0.529615	1	0.999631	0.826087
Acy3_Q91XE4_S7s_1	2.16	-1.05	-1.53	-0.74	-1.07	-1.78	0.98	-1.52	0.49	0.37	-1.38	0.79	-1.89	-0.7	-2.27	-3.44	-0.5575	0.3575	-1.785	0.540483	0.673281	0.0631393	1	0.999631	0.512978
Adam22_Q9R1V6_S772s_1	-0.53	0.13	-0.5	-1.27	-0.67	-0.36	-0.55	-0.61	0.06	-0.8	0.01	0.22	0.52	-0.77	-0.44	-1.38	-0.005	0.415	0.025	0.988021	0.296776	0.958138	1	0.999631	0.985497
Adam22_Q9R1V6_S774s_1	-0.28	0.4	0.28	0.17	1.19	0.47	0.84	0.61	1.14	-0.17	1.35	1.36	1.29	0.22	1.06	-0.35	0.635	0.7775	0.4125	0.0497383	0.0799159	0.338683	1	0.999631	0.731883
Adam22_Q9R1V6_S796s_1	0.38	0	-0.78	-0.95	-0.56	0.2	-0.85	-0.75	0.16	0.26	-0.53	-0.57	0.55	0.23	-0.78	-0.85	-0.1525	0.1675	0.125	0.703876	0.675554	0.788967	1	0.999631	0.925513
Adam22_Q9R1V6_S813s_1	-0.56	-0.63	0.22	-0.37	-0.66	-0.35	-0.43	-0.55	0.44	0.29	-0.3	0.18	0.21	-0.86	-0.24	0.24	-0.1625	0.4875	0.1725	0.569068	0.144962	0.639805	1	0.999631	0.870995
Adam22_Q9R1V6_S819s_1	-0.81	-0.64	-0.94	-0.99	-0.41	-0.46	-1.04	-0.65	-0.49	-0.94	-1.27	-0.53	-0.21	-0.09	-0.98	-0.66	0.205	0.0375	0.36	0.44388	0.896494	0.264655	1	0.999631	0.6935
Adam22_Q9R1V6_S867s_1	-0.87	-1.9	-0.09	0.17	-2.2	-1.56	0.04	-0.14	-2.04	-0.98	0.93	0.33	0.3	-1.29	0.36	-0.18	-0.2925	0.2325	0.47	0.6499	0.74749	0.408255	1	0.999631	0.766996
Adam22_Q9R1V6_S867s_2	-0.77	-0.97	-0.53	-2.11	-2.42	-1.64	-1.43	-1.37	-1.97	-1.07	-0.01	-1.72	1.79	-2.32	-1.47	-1.3	-0.62	-0.0975	0.27	0.163809	0.852635	0.747653	1	0.999631	0.911931
Adam22_Q9R1V6_S871s_2	-0.88	-1.48	-0.53	-2.11	-2.72	-1.71	-1.43	-1.37	-2.23	-1.01	-0.01	-1.72	1.3	-2.17	-1.47	-1.3	-0.5575	0.0075	0.34	0.235487	0.989107	0.645775	1	0.999631	0.873384
Adam22_Q9R1V6_S874s_1	0.38	-0.36	-0.12	-0.15	-0.41	-0.64	-0.14	0.08	-0.59	-1.13	-0.25	0.29	-1.02	-1.32	0.08	-0.11	-0.215	-0.3575	-0.53	0.467796	0.341477	0.204998	1	0.999631	0.6605
Adcy2_Q3V1Q3_S1089s_1	0.17	0.7	-0.24	-0.01	0.02	0.36	-0.32	0.2	-0.01	-0.12	-0.29	-0.35	0.29	-0.13	-0.83	0.14	-0.09	-0.3475	-0.2875	0.769008	0.256761	0.438362	1	0.999631	0.781942
Adcy2_Q3V1Q3_S476s_1	-1.28	-0.25	-0.64	-1.03	-0.64	-0.39	-1.04	-0.78	-0.79	-0.39	-0.58	-0.6	0.2	-0.54	-0.56	-0.64	0.0875	0.21	0.415	0.781454	0.501591	0.257278	1	0.999631	0.691981
Adcy5_P84309_S137s_1	0.16	-0.28	-0.5	0.02	-0.06	-0.88	-1.08	-0.95	-0.36	-0.26	-1.31	0	0.28	-0.2	-0.53	0.08	-0.5925	-0.3325	0.0575	0.0902205	0.363013	0.856	1	0.999631	0.951817
Adcy5_P84309_S156s_1	-0.08	0.37	-0.82	0.73	0.25	-0.17	-0.24	0.68	0.07	-0.27	-0.12	0.62	-0.27	-0.01	1.09	0.32	0.08	0.025	0.2325	0.841612	0.950031	0.604739	1	0.999631	0.85817
Adcy5_P84309_S49s_1	1.2	-0.65	-1.6	0.06	0.87	-0.43	0.26	-0.93	0.38	0.9	-0.69	-0.33	-1.03	-0.99	-0.06	-1.09	0.19	0.3125	-0.545	0.76535	0.618683	0.362891	1	0.999631	0.74343
Adcy5_P84309_S8s_1	-0.71	-0.86	-0.81	-0.6	-0.85	-1.35	-0.96	-0.34	-0.75	-0.88	-0.59	-0.48	0.1	-0.54	-0.31	-0.42	-0.13	0.07	0.4525	0.654147	0.780291	0.132845	1	0.999631	0.604808
Adcy5_P84309_T62t_1	2.76	-0.92	-0.46	1.1	1.53	-0.06	1.46	0.09	-0.1	1.02	-0.46	-1.26	-2.81	-1.82	0.01	-1.28	0.135	-0.82	-2.095	0.868793	0.340429	0.0363117	1	0.999631	0.453963
Adcy5_P84309_T665t_1	-0.71	-0.29	-0.16	1.15	0.93	0	0.93	2.01	0.44	-0.54	0.72	0.8	-0.54	0.23	1.09	1.16	0.97	0.3575	0.4875	0.0927846	0.467169	0.371003	1	0.999631	0.746338
Adcy6_F8VQ52_S53s_1	1.04	-0.77	-0.99	-0.32	0.08	-0.6	-0.28	-0.63	-0.12	0.52	-0.45	-0.91	-0.49	-0.3	-1.16	-0.4	-0.0975	0.02	-0.3275	0.833524	0.968922	0.500839	1	0.999631	0.814043
Adcy6_F8VQ52_S576s_1	-0.22	-0.85	-0.49	-0.14	0.02	-0.16	-0.19	-0.33	-0.2	-0.05	-0.19	-0.37	-0.4	0.2	-0.4	-0.1	0.26	0.2225	0.25	0.345917	0.427653	0.427202	1	0.999631	0.775206
Adcy8_P97490_S67s_1	-0.63	-0.57	-1.96	-1.82	-1.04	-1.09	-0.95	-1.74	-1.4	-1.67	-1.92	-2.19	-0.55	-0.64	-2.16	-1.69	0.04	-0.55	-0.015	0.9229	0.206261	0.976792	1	0.999631	0.992016
Adcy9_P51830_S1273s_1	-0.09	0.34	0.31	0.23	0.15	-0.14	-0.19	0.33	-0.27	-0.31	0.03	-0.1	-0.45	0.03	0.11	0.66	-0.16	-0.36	-0.11	0.544119	0.18355	0.73617	1	0.999631	0.90759
Adcy9_P51830_S354s_1	1.24	0.12	-4.32	-3.13	-0.58	0.49	-2.45	-4.2	-0.73	1.34	-3.68	-4.49	0.04	-0.88	-5.91	-6.92	-0.1625	-0.3675	-1.895	0.908877	0.818128	0.314027	1	0.999631	0.719959
Adcy9_P51830_S39s_1	2.78	-0.87	0.19	1.5	0.75	0.86	2.11	1	0.18	0.18	-0.11	-1.42	-2.5	-0.89	0.25	-0.92	0.28	-1.1925	-1.915	0.709271	0.147469	0.0436468	1	0.999631	0.475443
Adcy9_P51830_S49s_1	-0.15	0.26	-0.3	0.09	-0.25	-0.41	0.33	0.37	-0.09	-0.67	-0.04	-0.03	-0.63	-0.1	0.3	0.08	0.035	-0.1825	-0.0625	0.906724	0.529768	0.844622	1	0.999631	0.94856
Adcy9_P51830_S610s_1	-1.21	-1.32	-1.36	-1.61	-1.51	-1.93	-1.84	-1.77	-1.91	-1.43	-1.58	-1.45	-0.53	-2.11	-2	-1.47	-0.3875	-0.2175	-0.1525	0.142261	0.415103	0.701562	1	0.999631	0.896835
Adcy9_P51830_S613s_1	-0.41	-0.74	-0.35	-0.3	-0.61	-0.98	-0.84	-0.15	-1.31	-1.22	-0.46	-0.69	-0.87	-1.16	-0.47	-0.59	-0.195	-0.47	-0.3225	0.498002	0.143921	0.289671	1	0.999631	0.706164
Adcy9_P51830_S678s_1	-1.6	-1.18	-1.48	-2.27	-0.02	-1.23	-0.73	-2.42	0.31	-1.75	-0.74	-0.71	1.86	-2.33	-2.38	-2.56	0.5325	0.91	0.28	0.316174	0.074794	0.766496	1	0.999631	0.916961
Adcy9_P51830_T1275t_1	-0.47	-0.55	0.89	0.34	-0.87	-0.81	-0.12	1.28	-1.26	-1.32	0.62	0.71	-0.58	-0.53	-0.19	0.96	-0.1825	-0.365	-0.1375	0.743143	0.548212	0.775824	1	0.999631	0.920998
Adcyap1r1_E9Q3E8_S438s_1	-1.42	-0.23	0.45	-0.41	-0.57	0.02	-0.74	0.03	-0.07	-1.22	-1	0.17	-2.09	-0.03	-0.14	-1.36	0.0875	-0.1275	-0.5025	0.837917	0.795528	0.394273	1	0.999631	0.759303
Add1_F8WGR0_S12s_1	-0.6	-0.87	-0.3	-0.75	-1.16	-1.11	-0.82	-0.93	-1.28	-0.5	-0.74	-0.6	-0.48	-1.14	-0.43	-0.4	-0.375	-0.15	0.0175	0.166538	0.612853	0.954898	1	0.999631	0.984441
Add1_F8WGR0_S353s_2	0.02	-0.92	-0.08	-1	-1.37	-0.52	-0.52	-0.44	-0.68	0.49	-1.49	-0.93	-0.28	-1.1	-0.68	-1.56	-0.2175	-0.1575	-0.41	0.557768	0.742011	0.325509	1	0.999631	0.724678
Add1_F8WGR0_S355s_1	-0.17	-0.91	-0.71	-1	-1.05	-1.12	-0.92	-0.69	-1.31	-0.33	-0.66	-0.83	-0.3	-0.42	-0.74	-1.09	-0.2475	-0.085	0.06	0.394685	0.796415	0.855906	1	0.999631	0.951817
Add1_F8WGR0_S355s_2	-0.32	-0.89	-0.06	-0.68	-1.08	-0.57	-0.48	-0.07	-0.65	0	-1.13	-0.77	-0.35	-1.16	-0.43	-1.15	-0.0625	-0.15	-0.285	0.84684	0.663398	0.420345	1	0.999631	0.77267
Add1_F8WGR0_S366s_1	-0.25	-0.86	0.09	-0.4	-0.73	-0.65	-0.69	-0.36	-0.47	-0.57	-0.34	-0.3	-0.47	-0.75	-0.24	-0.04	-0.2525	-0.065	-0.02	0.390191	0.823532	0.95112	1	0.999631	0.984079
Add1_F8WGR0_S457s_2	0.72	-0.96	0.45	-0.96	-1.65	-0.19	0.52	-1.26	-0.63	0.85	-1.79	-1.5	-0.04	-1.38	-1.81	-1.45	-0.4575	-0.58	-0.9825	0.455731	0.393904	0.0995426	1	0.999631	0.562298
Add1_F8WGR0_S464s_1	1.42	-1.2	0.44	-0.94	-1.49	0.64	0.37	-1.3	-0.58	1.03	-0.19	-1.92	-0.54	-1.6	-1.05	-1.57	-0.375	-0.345	-1.12	0.608555	0.652112	0.087646	1	0.999631	0.553787
Add1_F8WGR0_S465s_1	1.34	-1.73	-0.15	0.13	-1.62	0.74	1.16	-1.38	-0.56	0.96	-1.08	-0.51	-0.28	-2.03	-0.04	-1.16	-0.1725	-0.195	-0.775	0.835394	0.776612	0.277487	1	0.999631	0.700874
Add1_F8WGR0_S465s_2	0.72	-0.96	0.45	-0.96	-1.65	-0.19	0.52	-1.26	-0.63	0.85	-1.79	-1.5	-0.04	-1.38	-1.81	-1.45	-0.4575	-0.58	-0.9825	0.455731	0.393904	0.0995426	1	0.999631	0.562298
Add1_F8WGR0_S617s_1	0.36	-0.4	-0.56	-0.8	-0.64	-0.15	-0.58	-0.96	-0.21	0.77	-0.83	-0.91	-0.03	-0.62	-0.91	-1.23	-0.2325	0.055	-0.3475	0.496289	0.903143	0.381007	1	0.999631	0.752619
Add1_F8WGR0_S631s_1	-1.33	-0.33	-0.69	-2.54	0.1	-0.95	-2.06	-2.37	-0.63	-1.24	-2.07	-1.43	1.89	-0.4	-2.63	-1.11	-0.0975	-0.12	0.66	0.882895	0.8214	0.474857	1	0.999631	0.799827
Add1_F8WGR0_T358t_1	-0.27	-0.39	-0.06	-0.16	-0.96	-1	-0.51	-0.28	-0.58	-0.61	-0.14	-0.51	-0.13	-0.71	-0.53	-0.98	-0.4675	-0.24	-0.3675	0.114363	0.364364	0.237166	1	0.999631	0.683301
Add1_F8WGR0_T358t_2	-0.35	-0.96	-0.06	-0.68	-1.08	-0.57	-0.48	-0.07	-0.68	-0.02	-1.13	-0.77	-0.35	-1.14	-0.43	-1.15	-0.0375	-0.1375	-0.255	0.908912	0.691492	0.472767	1	0.999631	0.799014
Add1_F8WGR0_T641t_1	-1.32	-1.44	-0.28	-1.23	-1.81	-1.9	-1.55	-1.02	-1.66	-1.14	-0.98	-0.59	-0.39	-1.17	-0.83	-0.53	-0.5025	-0.025	0.3375	0.181036	0.946448	0.364781	1	0.999631	0.745299
Add1_F8WGR0_T641t_2	0.13	0.68	0.77	0.01	0.01	0.61	-0.04	-0.32	0.08	0.83	-0.46	-0.04	0	0.12	0.11	0.7	-0.3325	-0.295	-0.165	0.314179	0.423407	0.614983	1	0.999631	0.861203
Add1_F8WGR0_T645t_1	-1.27	-0.24	0.53	-0.85	-1.39	0.03	-0.99	-0.48	0.13	-0.42	0.16	-0.01	0.27	0.31	0.04	0.63	-0.25	0.4225	0.77	0.600289	0.32515	0.0923113	1	0.999631	0.557085
Add1_F8WGR0_T645t_2	0.13	0.68	0.55	-0.1	0.01	0.61	-0.14	-0.17	0.08	0.83	-0.51	0	0	0.12	0	0.82	-0.2375	-0.215	-0.08	0.452334	0.556541	0.812079	1	0.999631	0.936949
Add1_F8WHZ9_S631s_1	-1.33	-0.33	-0.69	-2.54	0.1	-0.95	-2.06	-2.37	-0.63	-1.24	-2.07	-1.43	1.89	-0.4	-2.63	-1.11	-0.0975	-0.12	0.66	0.882895	0.8214	0.474857	1	0.999631	0.799827
Add1_F8WHZ9_T641t_1	-1.26	-1.32	0.19	-0.93	-1.67	-1.66	-1.29	-0.71	-1.41	-0.88	-0.6	-0.08	0.04	-0.93	-0.41	-0.03	-0.5025	0.0875	0.4975	0.243955	0.842988	0.259255	1	0.999631	0.692624
Add1_F8WHZ9_T641t_2	0.13	0.68	0.77	0.01	0.01	0.61	-0.04	-0.32	0.08	0.83	-0.46	-0.04	0	0.12	0.11	0.7	-0.3325	-0.295	-0.165	0.314179	0.423407	0.614983	1	0.999631	0.861203
Add1_F8WHZ9_T645t_1	-1.27	-0.24	0.53	-0.85	-1.39	0.03	-0.99	-0.48	0.13	-0.42	0.16	-0.01	0.27	0.31	0.04	0.63	-0.25	0.4225	0.77	0.600289	0.32515	0.0923113	1	0.999631	0.557085
Add1_F8WHZ9_T645t_2	0.13	0.68	0.55	-0.1	0.01	0.61	-0.14	-0.17	0.08	0.83	-0.51	0	0	0.12	0	0.82	-0.2375	-0.215	-0.08	0.452334	0.556541	0.812079	1	0.999631	0.936949
Add1_Q9QYC0_S600s_1	-1.33	-0.33	-0.69	-2.54	0.1	-0.95	-2.06	-2.37	-0.63	-1.24	-2.07	-1.43	1.89	-0.4	-2.63	-1.11	-0.0975	-0.12	0.66	0.882895	0.8214	0.474857	1	0.999631	0.799827
Add1_Q9QYC0_S628s_1	0.08	1.59	2.05	0.98	0.48	1.83	0.34	1.05	1.19	1.65	0.92	1.47	1.56	1.6	1.45	2.05	-0.25	0.1325	0.49	0.624639	0.767368	0.287286	1	0.999631	0.705972
Add1_Q9QYC0_T610t_1	-1.64	-1.97	-2.92	-3.58	-2.07	-2.24	-3.02	-3.6	-2.06	-1.6	-2.67	-3.24	-0.73	-1.72	-3.63	-3.3	-0.205	0.135	0.1825	0.697946	0.799837	0.799486	1	0.999631	0.931051
Add1_Q9QYC0_T610t_2	0.13	0.68	0.12	-0.3	0.01	0.61	-0.58	-0.39	0.08	0.83	-0.76	-0.17	0	0.12	-0.26	0.07	-0.245	-0.1625	-0.175	0.49738	0.68479	0.576566	1	0.999631	0.846204
Add1_Q9QYC0_T614t_1	-1.27	-0.24	0.53	-0.85	-1.39	0.03	-0.99	-0.48	0.13	-0.42	0.16	-0.01	0.27	0.31	0.04	0.63	-0.25	0.4225	0.77	0.600289	0.32515	0.0923113	1	0.999631	0.557085
Add1_Q9QYC0_T614t_2	0.13	0.68	-0.14	-0.41	0.01	0.61	-0.78	-0.37	0.08	0.83	-0.86	-0.2	0	0.12	-0.39	-0.07	-0.1975	-0.1025	-0.15	0.611683	0.808501	0.651497	1	0.999631	0.876488
Add2_Q9QYB8_S11s_1	-0.75	-0.46	-0.08	-0.66	-0.55	-1.02	-0.91	-0.68	-0.63	-0.88	-0.4	-0.6	0.02	-0.62	-0.56	-0.56	-0.3025	-0.14	0.0575	0.282672	0.616805	0.851921	1	0.999631	0.950099
Add2_Q9QYB8_S528s_1	1.17	-1.05	-1.22	0.04	-0.39	-0.78	-0.56	-0.63	-0.86	-0.65	-1.26	-1.08	-0.25	-0.01	-0.62	-0.68	-0.325	-0.6975	-0.125	0.535994	0.210018	0.816688	1	0.999631	0.937777
Add2_Q9QYB8_S530s_1	-0.19	-0.59	-1.4	0.13	0.14	-0.32	-0.2	-0.34	-0.31	-0.13	-0.97	-1.09	-0.46	-0.52	0	0.01	0.3325	-0.1125	0.27	0.376755	0.785825	0.494342	1	0.999631	0.81007
Add2_Q9QYB8_S532s_1	0.9	0.07	-0.02	0.09	0.64	-0.14	0.4	-0.64	0.49	0.57	-0.16	0.88	-0.67	-0.03	0.02	0.75	-0.195	0.185	-0.2425	0.604647	0.596827	0.538851	1	0.999631	0.830899
Add2_Q9QYB8_S539s_1	0.71	0.41	0.82	0.32	-0.14	0.79	-0.08	1.1	0.62	0.81	-0.73	1.1	0.63	0.76	0.99	1.31	-0.1475	-0.115	0.3575	0.681588	0.786604	0.248465	1	0.999631	0.685751
Add2_Q9QYB8_S594s_1	-0.88	1.18	-0.22	0.16	0.23	0.98	0	0.32	1.35	0.66	0.59	0.92	2.29	1.13	0.17	1	0.3225	0.82	1.0875	0.488822	0.0957658	0.078775	1	0.999631	0.545479
Add2_Q9QYB8_S598s_1	0.8	1.77	1.03	1.11	1.49	2.12	0.04	0.58	1.24	1.91	-0.06	0.08	1.79	1.99	-0.01	-0.45	-0.12	-0.385	-0.3475	0.803237	0.441665	0.563631	1	0.999631	0.841252
Add2_Q9QYB8_S598s_2	0.75	1.18	0.28	-0.32	1.07	1.08	-0.5	0.3	0.88	0.71	-0.27	0.02	0.32	1.42	-0.18	0.07	0.015	-0.1375	-0.065	0.974605	0.746477	0.889565	1	0.999631	0.963505
Add2_Q9QYB8_S598s_3	0.42	1.37	1.27	1.68	1.22	1.3	0.99	1.63	1.04	1.01	1.17	0.88	0.1	0.96	1.15	1.62	0.1	-0.16	-0.2275	0.767161	0.628781	0.596475	1	0.999631	0.854508
Add2_Q9QYB8_S602s_1	-0.83	-1.07	0.71	-1.12	-1.92	-2.09	-0.84	-0.57	-2.13	-0.6	-0.17	-0.11	0.54	-0.95	-1.12	-0.46	-0.7775	-0.175	0.08	0.167586	0.765759	0.881341	1	0.999631	0.963364
Add2_Q9QYB8_S602s_2	-1.14	-0.59	-0.44	-1.62	-1.78	-1	-1.47	-1.46	-1.26	-0.4	-1.32	-0.85	0.48	-1.08	-1.08	-0.89	-0.48	-0.01	0.305	0.18674	0.97848	0.510843	1	0.999631	0.817687
Add2_Q9QYB8_S602s_3	0.42	1.37	1.27	1.68	1.22	1.3	0.99	1.63	1.04	1.01	1.17	0.88	0.1	0.96	1.15	1.62	0.1	-0.16	-0.2275	0.767161	0.628781	0.596475	1	0.999631	0.854508
Add2_Q9QYB8_S606s_2	-1.48	-0.84	-0.12	-1.07	-2.26	-1.28	-1.05	-0.61	-1.47	-0.45	-0.89	-0.58	0.42	-1.31	-0.75	-0.48	-0.4225	0.03	0.3475	0.34771	0.937753	0.452843	1	0.999631	0.788525
Add2_Q9QYB8_S606s_3	0.42	1.37	1.27	1.68	1.22	1.3	0.99	1.63	1.04	1.01	1.17	0.88	0.1	0.96	1.15	1.62	0.1	-0.16	-0.2275	0.767161	0.628781	0.596475	1	0.999631	0.854508
Add2_Q9QYB8_S60s_1	0.08	0.64	0.38	-0.26	-0.07	0.91	-0.36	0.2	0.03	0.33	-0.01	0.08	0.49	0.78	0.58	0.72	-0.04	-0.1025	0.4325	0.911121	0.726521	0.177456	1	0.999631	0.642116
Add2_Q9QYB8_S614s_2	-4.03	-6.59	-0.08	0.22	-6.49	-3.53	0.43	-1.35	-7.22	-6.29	-1.07	-0.93	-7.96	-3.41	-1.08	-1.39	-0.115	-1.2575	-0.84	0.950956	0.529876	0.660613	1	0.999631	0.880315
Add2_Q9QYB8_S618s_1	-0.41	-0.13	1.12	-1.67	-3.16	-0.94	-1.47	-3.29	-1.94	0.64	-1.6	-1.05	1.87	-0.67	-0.99	-1.38	-1.9425	-0.715	-0.02	0.0223651	0.33261	0.980308	1	0.999631	0.994107
Add2_Q9QYB8_S618s_2	-4.03	-6.59	-0.08	0.22	-6.49	-3.53	0.43	-1.35	-7.22	-6.29	-1.07	-0.93	-7.96	-3.41	-1.08	-1.39	-0.115	-1.2575	-0.84	0.950956	0.529876	0.660613	1	0.999631	0.880315
Add2_Q9QYB8_S623s_1	-1.61	-4.54	-3.78	-4.11	-3.37	-3.75	-2.92	-3.21	-3.05	-2.3	-2.79	-4.12	-1.95	-3.9	-4.72	-4.22	0.1975	0.445	-0.1875	0.745936	0.51577	0.809835	1	0.999631	0.936643
Add2_Q9QYB8_S62s_1	-0.29	-0.4	0.38	-0.15	-0.62	-0.33	-0.7	-0.6	-1.35	-0.13	-0.69	-0.44	-0.6	0.11	0.44	0.27	-0.4475	-0.5375	0.17	0.129327	0.148682	0.625676	1	0.999631	0.864021
Add2_Q9QYB8_S692s_1	-0.72	0.21	0.36	-0.16	-0.34	-0.19	-0.55	-0.2	-0.05	0.18	-0.13	0.35	1.25	0.34	0.17	0.37	-0.2425	0.165	0.61	0.441416	0.610891	0.131118	1	0.999631	0.602916
Add2_Q9QYB8_S692s_2	-3.1	-3.4	0.85	0.04	-3.67	-3.36	0.23	0.2	-4.86	-2.22	0.43	0.53	-4.57	-3.29	0.17	1.08	-0.2475	-0.1275	-0.25	0.84899	0.928705	0.863583	1	0.999631	0.955131
Add2_Q9QYB8_S696s_1	-0.19	0.88	1.09	0.16	0.25	1.1	-0.4	0.62	0.44	0.64	0.11	0.68	1.92	0.93	0.67	0.94	-0.0925	-0.0175	0.63	0.829228	0.961246	0.156924	1	0.999631	0.626839
Add2_Q9QYB8_S700s_1	-2.89	-5.49	-3.01	-2.42	-4.08	-5.08	-2.53	-2.43	-4.81	-3.79	-2.55	-2.6	-3.4	-4.76	-2.83	-2.66	-0.0775	0.015	0.04	0.924712	0.984489	0.956771	1	0.999631	0.984803
Add2_Q9QYB8_T561t_1	-0.74	-0.11	-0.66	-0.86	-0.71	-0.62	-0.72	-0.57	-0.54	-1	-0.32	0.13	0.18	-0.24	-0.62	-0.27	-0.0625	0.16	0.355	0.814719	0.635777	0.280069	1	0.999631	0.701922
Add3_Q9QYB5_S42s_1	-0.39	0.23	-0.1	-0.04	-0.28	0.34	-0.16	0.08	0.44	0.5	-0.02	-0.04	0.47	0.81	-0.05	0.25	0.07	0.295	0.445	0.798844	0.313877	0.176122	1	0.999631	0.642116
Add3_Q9QYB5_S461s_1	0.67	-1.18	0.4	-0.06	-1.96	-0.33	1.7	-1.54	-1.52	0.89	-1.18	-1.37	-1.61	-1.77	-1.34	-1.89	-0.49	-0.7525	-1.61	0.544191	0.250434	0.00378968	1	0.999631	0.351308
Add3_Q9QYB5_S641s_1	-0.88	-1.04	-0.81	-1.09	-0.95	-0.9	-0.9	-0.75	-0.61	-0.41	-0.59	-0.77	-0.49	-0.65	-0.49	-0.27	0.08	0.36	0.48	0.734275	0.170467	0.097	1	0.999631	0.55886
Add3_Q9QYB5_S645s_1	0.06	0.8	0.62	0.19	0.25	0.34	-0.11	0.24	0.17	0.86	0.34	0.54	1.08	0.52	0.11	0.65	-0.2375	0.06	0.1725	0.407241	0.84303	0.608923	1	0.999631	0.858851
Add3_Q9QYB5_S649s_1	-1.85	-3.52	-3.05	-1.96	-2.77	-4.36	-1.77	-2.29	-3.93	-3.27	-1.8	-2.68	-2.52	-3.66	-2.18	-2.58	-0.2025	-0.325	-0.14	0.745741	0.567195	0.779316	1	0.999631	0.921416
Add3_Q9QYB5_S64s_1	0.33	1.36	1.37	0.72	1.03	0.94	0.35	1.1	0.95	1.41	0.62	1.09	0.33	0.86	1.58	1.69	-0.09	0.0725	0.17	0.79245	0.833788	0.68798	1	0.999631	0.891733
Add3_Q9QYB5_T12t_1	-0.88	-0.55	-0.55	-0.96	-0.92	-0.92	-1.13	-0.84	-1.19	-0.48	-1.3	-0.95	0.11	-0.81	-0.81	-0.35	-0.2175	-0.245	0.27	0.391112	0.413095	0.413628	1	0.999631	0.768649
Adgra1_Q8C4G9_S537s_1	0.11	-0.9	-0.35	1.78	0.44	-2.02	-0.21	0.46	0.32	-0.56	-0.04	-0.08	-0.82	-0.14	-1.29	0.43	-0.4925	-0.25	-0.615	0.501642	0.656433	0.336856	1	0.999631	0.730499
Adgra1_Q8C4G9_T239t_1	-1.44	2.22	0.6	-0.98	2.03	1.15	0.7	0.46	3.86	0.21	0.96	1.53	3.19	1.26	1.05	-0.21	0.985	1.54	1.2225	0.229755	0.143603	0.210561	1	0.999631	0.664726
Adgrb1_E9Q4H5_S336s_1	-0.01	-0.05	-0.24	-0.23	0.33	0.73	-0.6	-0.23	-0.29	-0.13	0.57	-0.63	-0.12	0.06	-0.34	0.84	0.19	0.0125	0.2425	0.576403	0.968767	0.473768	1	0.999631	0.799779
Adgrb1_E9Q4H5_S349s_1	-0.57	0.87	0.33	-1.34	1.29	0.67	1.57	-0.15	1.52	-0.59	1.44	1.24	2.32	0.01	-0.43	-1.1	1.0225	1.08	0.3775	0.0955709	0.112409	0.629105	1	0.999631	0.866534
Adgrb1_E9Q4H5_S364s_1	0.4	0.82	1	1.13	1.09	1.25	0.33	1.08	0.8	0.13	0.46	1.47	0.3	0.86	1.48	1.78	0.1	-0.1225	0.2675	0.750058	0.73467	0.502123	1	0.999631	0.814092
Adgrb1_E9Q4H5_S527s_1	-1.28	0.51	-0.37	-1.4	0.46	-0.26	-0.38	-1.16	0.1	-0.98	-0.45	0.22	-0.48	-0.88	-0.95	-1.15	0.3	0.3575	-0.23	0.564845	0.478683	0.6201	1	0.999631	0.861888
Adgrb1_E9Q4H5_T308t_1	0.67	0.81	-0.42	1.59	1.01	1.02	1.14	1.67	-0.65	-1.63	1.2	-0.6	-0.31	0.34	-0.21	0.92	0.5475	-1.0825	-0.4775	0.225334	0.11977	0.337382	1	0.999631	0.730499
Adgrb2_B1ASC0_S1131s_1	1.6	-0.84	0.62	0.78	-1.3	0.74	1.14	0.34	0.19	0.06	0	-0.44	0.33	-1.06	0.66	-0.62	-0.31	-0.5875	-0.7125	0.639268	0.256487	0.246037	1	0.999631	0.685751
Adgrb2_B1ASC0_S1415s_1	-0.86	-1.54	-1.8	-1.33	-1.63	-1.06	-1.63	-1.38	-1.69	-0.74	-1.28	-1.7	-0.83	-1.13	-1.35	-1.4	-0.0425	0.03	0.205	0.888045	0.930501	0.526697	1	0.999631	0.824261
Adgrl1_H7BX15_S1128s_1	0.52	-0.97	-0.86	-0.35	-0.88	-0.43	-0.22	-0.72	-0.67	0.18	-0.51	-0.72	-0.66	-0.75	-0.89	-0.64	-0.1475	-0.015	-0.32	0.700761	0.970604	0.408933	1	0.999631	0.766996
Adgrl1_H7BX15_S1146s_1	-0.33	0.97	0.33	1.64	1.87	1.76	2.41	1.55	2.47	-0.65	2.26	2.08	-1.19	-0.04	1.51	-0.68	1.245	0.8875	-0.7525	0.0183985	0.253485	0.262568	1	0.999631	0.693034
Adgrl1_H7BX15_S1171s_1	-0.76	0.09	-0.66	-0.55	0.17	-0.04	-0.73	-0.34	0.06	-0.16	-0.4	-0.6	0.59	0.32	-1.28	-0.91	0.235	0.195	0.15	0.470382	0.531335	0.75563	1	0.999631	0.913663
Adgrl1_H7BX15_S1213s_1	-0.95	-0.41	-2.58	-2.15	-0.67	-0.66	-2.23	-1.99	-0.16	-1.21	-2.28	-2.21	-0.32	-0.49	-1.26	-3.28	0.135	0.0575	0.185	0.820667	0.928442	0.803955	1	0.999631	0.93396
Adgrl1_H7BX15_S1219s_1	-1.08	-1.58	-1.06	-0.53	-1.36	-2.82	-1.32	-1.28	-1.62	-2.11	-0.81	-1.65	-0.54	-2.78	-0.92	-1.25	-0.6325	-0.485	-0.31	0.160579	0.211981	0.546866	1	0.999631	0.834213
Adgrl1_H7BX15_S1222s_1	-0.02	-1.72	-0.86	-0.29	-0.52	-1.34	-0.41	-0.47	-1.27	-1.61	-0.24	0.08	-0.63	-1.06	0.02	-0.6	0.0375	-0.0375	0.155	0.930115	0.942292	0.72536	1	0.999631	0.90568
Adgrl1_H7BX15_S1374s_1	-0.27	-1.14	0.4	-0.37	-0.53	-0.15	-0.5	-0.8	-0.29	-0.07	-1.19	-0.14	0.35	0.24	-0.11	-0.1	-0.15	-0.0775	0.44	0.68146	0.851693	0.258236	1	0.999631	0.692624
Adgrl1_H7BX15_S1384s_1	0.23	1.1	-1.75	0.54	2.46	0.28	0.6	0.42	1.76	-1.04	1.22	0.22	-0.56	1.17	-1.29	0.07	0.91	0.51	-0.1825	0.219495	0.512554	0.798937	1	0.999631	0.930937
Adgrl1_H7BX15_S1444s_1	-0.49	0	-0.22	-0.17	-0.35	-0.67	-0.3	-0.41	-0.84	-1.06	-0.66	-0.76	0.09	-0.34	0.14	-0.22	-0.2125	-0.61	0.1375	0.405587	0.0384508	0.630487	1	0.999631	0.867509
Adgrl1_H7BX15_T1172t_1	-0.91	-1.82	-0.22	0.19	-1.14	-1.85	-0.52	-0.05	-1.9	-2.92	-0.51	-0.21	-0.19	-1.14	0.32	-0.41	-0.2	-0.695	0.335	0.712562	0.324373	0.514693	1	0.999631	0.819375
Adgrl2_Q0P6A0_S145s_1	-0.59	0.16	-0.09	-0.03	0.23	-0.24	-0.58	-0.07	0.01	-0.39	0.09	0.55	0.68	0.39	-0.04	0.42	-0.0275	0.2025	0.5	0.926357	0.524105	0.131792	1	0.999631	0.603456
Adgrl2_Q0P6A0_S175s_1	-1.38	-0.24	-0.12	-0.42	0.42	-0.25	-0.59	0.09	-0.02	-0.34	0.12	0.07	0.07	0.56	-0.45	0.15	0.4575	0.4975	0.6225	0.241395	0.173178	0.130719	1	0.999631	0.602177
Adgrl2_Q0P6A0_S180s_1	-0.83	0.33	-0.72	-0.3	-0.14	0.04	-0.31	-0.59	-0.45	-0.01	-0.04	0.19	0.18	0.17	0.34	0.43	0.13	0.3025	0.66	0.698	0.384187	0.0741397	1	0.999631	0.539897
Adgrl3_F6WMY5_S558s_1	1.75	-2.55	-1.91	-0.27	-0.68	-0.97	0.56	-1.88	-1.53	-0.71	-1.61	-2.09	-1.64	-2.05	-1.59	-3.87	0.0025	-0.74	-1.5425	0.997867	0.405769	0.126492	1	0.999631	0.596745
Adgrl3_F6WMY5_S576s_1	-0.03	-0.27	0.6	0.8	0.58	0.54	2.84	0.33	0.66	-1.54	0.82	0.94	-1.74	-1.99	0.11	-1.24	0.7975	-0.055	-1.49	0.193551	0.925289	0.0140325	1	0.999631	0.385092
Adgrl3_F6WMY5_S590s_1	-1.06	-1.09	-0.88	-0.47	-0.74	-1.47	-0.67	-0.96	-1.17	-1.27	-1.51	-0.63	-1.41	-0.95	0.35	-0.37	-0.085	-0.27	0.28	0.77465	0.386953	0.509451	1	0.999631	0.816932
Adgrl3_F6WMY5_S776s_1	-0.29	1.43	-0.33	-0.3	0.75	1.04	-0.33	-0.82	1.2	0.05	0.44	0.03	0.1	1.7	-0.98	-1.28	0.0325	0.3025	-0.2425	0.954048	0.540807	0.733038	1	0.999631	0.907434
Adgrl3_F6WMY5_S821s_1	0.68	1.32	0.72	1.34	1.19	1.85	0.5	1.51	1.49	1.46	1.13	0.72	-0.03	1.75	1.31	0.96	0.2475	0.185	-0.0175	0.500299	0.563404	0.967439	1	0.999631	0.988504
Adgrl3_F6WMY5_S858s_1	-0.32	1.72	2.85	1.34	0.42	2.33	3.5	1.48	1.25	-0.07	1.99	2.41	2.13	0.48	2.81	0.5	0.535	-0.0025	0.0825	0.512421	0.997347	0.91477	1	1	0.972775
Adh6a_E9Q4Y1_T3t_3	-1.92	-0.59	-0.61	-1.55	-0.11	-1.11	-0.75	-1.53	-0.57	-1.8	-0.72	-0.04	0.58	-1.53	-0.55	-0.63	0.2925	0.385	0.635	0.510481	0.430038	0.23856	1	0.999631	0.683403
Adh6a_E9Q4Y1_T7t_3	-1.92	-0.59	-0.61	-1.55	-0.11	-1.11	-0.75	-1.53	-0.57	-1.8	-0.72	-0.04	0.58	-1.53	-0.55	-0.63	0.2925	0.385	0.635	0.510481	0.430038	0.23856	1	0.999631	0.683403
Adh6a_E9Q4Y1_T9t_3	-1.92	-0.59	-0.61	-1.55	-0.11	-1.11	-0.75	-1.53	-0.57	-1.8	-0.72	-0.04	0.58	-1.53	-0.55	-0.63	0.2925	0.385	0.635	0.510481	0.430038	0.23856	1	0.999631	0.683403
Adra1d_A2ANQ2_S444s_1	1.71	0.34	0.19	0.73	0.06	1.16	1.17	0.63	0.35	1.07	-0.32	0.09	-1.28	-0.77	-0.33	-0.4	0.0125	-0.445	-1.4375	0.976544	0.328795	0.00611026	1	0.999631	0.351545
Adra1d_P97714_S281s_1	1.05	0.14	-0.14	1.28	0.82	0	0.99	0.72	0.53	-0.08	0.86	0.55	-1.06	0.32	-0.16	0.47	0.05	-0.1175	-0.69	0.902491	0.772684	0.168693	1	0.999631	0.637839
Adra2a_Q01338_S255s_1	0.42	-0.48	-0.24	-0.29	-0.55	-0.4	-0.16	0.68	-0.25	0.05	-0.25	-0.85	-0.46	-0.48	0.03	-0.86	0.04	-0.1775	-0.295	0.911658	0.589815	0.389767	1	0.999631	0.758766
Adra2a_Q01338_S339s_1	0.06	-0.17	-0.07	0.48	0.36	-0.43	0.26	0.47	-0.29	-0.53	0.63	0.07	0.16	-0.19	0.18	1.01	0.09	-0.105	0.215	0.769242	0.755996	0.542411	1	0.999631	0.832881
Adra2a_Q01338_S346s_1	-0.64	-0.91	-1.2	-1.33	-1.29	-1.05	-1.19	-0.97	-0.62	0.16	-1.94	-1.07	0.09	-0.56	-0.43	-1.37	-0.105	0.1525	0.4525	0.694601	0.737758	0.247699	1	0.999631	0.685751
Adra2a_Q01338_S360s_1	0.47	-2.21	-0.76	-0.46	-1.44	-2.17	0.17	-0.18	-2.02	-0.29	-1.13	-1.31	-1.32	-2.09	-0.8	-1.56	-0.165	-0.4475	-0.7025	0.811103	0.462978	0.235187	1	0.999631	0.683301
Adra2a_Q01338_S362s_1	0.46	-1.77	-0.65	-1.59	-0.58	-2.35	0.27	0.54	-1.57	0.36	0.57	0.6	-1.17	-1.6	0.17	0.37	0.3575	0.8775	0.33	0.62638	0.202519	0.606612	1	0.999631	0.858318
Adra2c_Q01337_S257s_1	-0.77	-1.35	-0.51	-0.95	-1.42	-1.29	-1.13	-0.48	-1.38	-0.91	-0.77	-0.77	-0.59	-1.36	-0.9	-0.55	-0.185	-0.0625	0.045	0.567445	0.83631	0.891698	1	0.999631	0.964276
Adra2c_Q01337_S287s_1	0	-0.49	-3.95	-2.92	0.08	-0.87	-1.76	-2.54	0.16	0.33	-1.15	-4.27	-0.81	-0.18	-2.74	-3.18	0.5675	0.6075	0.1125	0.555278	0.62094	0.912296	1	0.999631	0.972165
Adrb1_P34971_S274s_1	-0.97	0.69	-0.98	-2.08	-0.23	0.49	-2.01	-1.34	-0.13	-0.22	-1.83	-1.01	0.98	0.19	-1.47	-1.14	0.0625	0.0375	0.475	0.929411	0.952398	0.511308	1	0.999631	0.817687
Adrbk1_Q7TS64_S628s_1	0.43	0.26	0.58	0.1	0.4	0.39	0.11	0.46	0.43	0.3	0.27	0.44	-0.49	0.89	0.63	0.65	-0.0025	0.0175	0.0775	0.992029	0.944798	0.833883	1	0.999631	0.943862
AF529169_Q8K3V7_S118s_1	0.7	-0.1	-0.06	0.55	0.33	-0.11	0.72	0.19	0.37	0.8	0.11	1.18	-0.17	0.25	-0.19	-0.15	0.01	0.3425	-0.3375	0.974892	0.342121	0.301711	1	0.999631	0.714303
Afap1_Q80YS6_S549s_1	1.15	0.05	0.73	0.81	0	0.62	0.9	0.15	0.37	1.35	0.31	0.72	-0.63	-0.88	0.98	-0.31	-0.2675	0.0025	-0.895	0.443508	0.994502	0.0785191	1	0.999631	0.544927
Afap1_Q80YS6_S669s_1	-0.02	-0.07	0.11	0.24	0.19	0.32	-0.1	-0.09	0.5	0.24	0.07	0.05	0.13	0.12	-0.32	-0.04	0.015	0.15	-0.0925	0.951893	0.562856	0.736589	1	0.999631	0.90765
Afap1l1_Q8BZI0_S329s_1	1.36	0.83	1.1	1.56	1.56	1.55	1.2	1.38	1.26	-0.03	1.15	0.64	-0.13	1.75	1.19	0.79	0.21	-0.4575	-0.3125	0.445647	0.228927	0.476574	1	0.999631	0.799947
Afap1l1_Q8BZI0_S747s_1	1.2	1.22	0.49	0.78	1.37	1.26	0.13	0.06	1.29	1.2	0.37	0.65	1.17	1.54	0.5	0.2	-0.2175	-0.045	-0.07	0.588792	0.892381	0.856045	1	0.999631	0.951817
Afap1l2_Q5DTU0_S484s_1	0.01	1.03	0.25	0.11	0.65	0.79	-0.38	-0.27	0.7	0.76	0.59	0.98	1.23	0.76	1.04	0.74	-0.1525	0.4075	0.5925	0.6973	0.211625	0.0986147	1	0.999631	0.562298
Aff4_Q9ESC8_S1059s_1	-0.24	0.35	0.34	-0.22	-0.48	0.07	-0.54	-0.81	-0.46	-0.18	-0.08	0.28	0.53	0.48	0.21	-0.64	-0.4975	-0.1675	0.0875	0.128655	0.580968	0.810421	1	0.999631	0.936878
Aff4_Q9ESC8_S544s_1	2.68	-0.05	1.5	1.36	0	-0.03	2.29	0.08	0.6	1.97	0.43	-0.21	0.52	-1.29	-0.1	-0.69	-0.7875	-0.675	-1.7625	0.279916	0.313193	0.0160538	1	0.999631	0.388832
Aff4_Q9ESC8_S614s_1	2.57	1.58	1.94	1.16	0.78	1.62	1.44	0.63	1.11	1.78	0.15	1.26	0.26	0.93	0.26	-0.06	-0.695	-0.7375	-1.465	0.101524	0.12269	0.00371856	1	0.999631	0.351308
Aff4_Q9ESC8_S615s_1	2.57	1.58	1.94	1.16	0.78	1.62	1.44	0.63	1.11	1.78	0.15	1.26	0.26	0.93	0.26	-0.06	-0.695	-0.7375	-1.465	0.101524	0.12269	0.00371856	1	0.999631	0.351308
Aftph_H3BKM5_S240s_1	-0.52	-0.7	-0.54	-0.1	-0.69	-0.5	-0.22	-0.57	-0.87	-1.23	-0.12	0.34	0.07	-0.05	0.02	-0.16	-0.03	-0.005	0.435	0.909219	0.98985	0.140993	1	0.999631	0.61245
Aftph_H3BKM5_S525s_1	-0.35	4.68	3.52	0.21	5.67	3.16	3.69	1.65	7.62	0.12	4.92	6.74	8.15	2.43	2.81	0.81	1.5275	2.835	1.535	0.245542	0.131942	0.372823	1	0.999631	0.747035
Agap1_E9Q3K3_S124s_1	-0.72	-0.45	0.13	-1.23	-0.76	-0.61	-1.2	-0.1	-1.83	-0.32	-1.56	0.3	-0.23	-0.77	-0.63	-0.3	-0.1	-0.285	0.085	0.79135	0.599835	0.813864	1	0.999631	0.937041
Agap1_E9Q3K3_S152s_1	2.69	-0.87	-0.09	1.41	1.1	0.52	2.12	0.86	0.41	-0.44	0.38	-1.03	-1.45	-0.89	-1.33	-0.54	0.365	-0.955	-1.8375	0.63197	0.229647	0.0274444	1	0.999631	0.423809
Agap1_E9Q3K3_S292s_1	0.3	-1.84	-1.54	-1.81	-1.3	-1.07	-1.73	-2.17	-0.7	-0.96	-2.77	-1.77	-1.88	-2.34	-1.83	-2.58	-0.345	-0.3275	-0.935	0.515955	0.603516	0.0938884	1	0.999631	0.558128
Agap1_E9Q3K3_S295s_1	0.79	-1.56	-1.81	-0.34	-0.72	-1.04	-0.16	-0.35	-0.91	0.65	-0.87	-2.12	-1.28	-1.21	-1.8	-1.1	0.1625	-0.0825	-0.6175	0.777525	0.910128	0.294233	1	0.999631	0.708293
Agap1_E9Q3K3_S295s_2	-0.19	-4.5	-0.43	-0.16	0.04	-2.9	-0.05	0.4	-1.36	-0.24	-0.3	-0.39	-1.77	-2.25	-0.42	-0.44	0.6925	0.7475	0.1	0.540072	0.437973	0.919652	1	0.999631	0.974724
Agap1_E9Q3K3_S57s_1	3.11	-0.49	-0.59	1.52	1.34	0.59	2.15	0.72	0.65	0.89	0.34	-0.59	-1.98	-0.1	0.07	-1.1	0.3125	-0.565	-1.665	0.707852	0.499188	0.0796029	1	0.999631	0.545579
Agap1_E9Q3K3_S591s_1	2.41	0.46	0.96	1.52	0.56	1.33	2.13	0.77	1.16	1.66	1.12	0.63	-1.02	0.04	0.93	0.5	-0.14	-0.195	-1.225	0.783619	0.670674	0.0471234	1	0.999631	0.480102
Agap1_E9Q3K3_S674s_1	-1.26	-0.59	-0.29	-0.21	-0.36	-0.26	0.23	1.06	-0.56	-0.93	0.6	0.45	-0.03	0	1.35	0.46	0.755	0.4775	1.0325	0.0869497	0.293126	0.0303234	1	0.999631	0.43753
Agap1_E9Q3K3_S720s_1	0.85	0	-0.18	0.63	0.62	0.85	0.34	1.13	0.19	0.43	-0.11	0.02	-0.58	0.73	0.39	0.22	0.41	-0.1925	-0.135	0.240534	0.559723	0.734574	1	0.999631	0.907462
Agap1_E9Q3K3_S92s_1	0.96	0.08	-0.39	1.24	1.28	0.81	0.61	0.99	1.71	0.84	0.72	0.72	-0.53	1.02	0.97	0.92	0.45	0.525	0.1225	0.283847	0.253085	0.809643	1	0.999631	0.936634
Agap1_E9Q3K3_T1035t_1	0.61	-1.34	-1.13	1.23	1.96	-1.1	1.17	0.85	0.4	-0.79	0.3	-1.04	-2.77	-0.18	-0.26	0.44	0.8775	-0.125	-0.535	0.285096	0.849834	0.522614	1	0.999631	0.821224
Agap1_E9Q3K3_T224t_1	0.33	0.53	0.48	1.15	1.02	0.83	0.56	1.21	1.41	0.75	1.59	1.15	0.48	1.37	1.02	1.18	0.2825	0.6025	0.39	0.350206	0.082736	0.259314	1	0.999631	0.692624
Agap2_Q3UHD9_S1148s_1	-0.53	0.71	0.94	-0.46	0.33	0.34	-0.12	-0.1	0.41	-0.31	-0.53	-1.24	0.2	1.27	0.86	0.84	-0.0525	-0.5825	0.6275	0.897216	0.251796	0.179617	1	0.999631	0.64376
Agap2_Q3UHD9_S1171s_1	0.92	0.1	0.93	1.6	0.13	0.37	1.45	1	0.32	1.02	1.33	0.54	-1.23	-0.14	1.67	1.28	-0.15	-0.085	-0.4925	0.723987	0.830402	0.460312	1	0.999631	0.791962
Agap2_Q3UHD9_S1171s_2	1.67	0.83	-1.12	1.99	2.4	2.04	2	1.5	1.72	1.34	1.39	-0.12	-2.42	0.52	0.19	0.77	1.1425	0.24	-1.0775	0.101851	0.738978	0.237591	1	0.999631	0.683301
Agap2_Q3UHD9_S1175s_2	1.69	0.89	-1.12	1.99	2.55	2.16	2	1.5	1.66	1.35	1.39	-0.12	-2.93	0.51	0.19	0.77	1.19	0.2075	-1.2275	0.0939308	0.772673	0.217344	1	0.999631	0.669707
Agap2_Q3UHD9_S149s_1	-1	0.55	0.82	-0.86	-0.82	-1.07	-0.22	-0.91	-0.57	-0.14	0.31	-0.17	1.22	-0.54	-1.16	0.63	-0.6325	-0.02	0.16	0.207455	0.966914	0.804092	1	0.999631	0.934014
Agap2_Q3UHD9_S168s_1	2.39	-2.69	-0.68	0.26	0.95	-1.47	1.5	-0.47	-1.27	-1.88	-1.5	-2.78	-2.78	-2.35	-0.6	-1.63	0.3075	-1.6775	-1.66	0.774829	0.104836	0.117846	1	0.999631	0.585087
Agap2_Q3UHD9_S211s_1	0.11	0.71	0.24	-0.07	0.3	1.33	-0.14	0.44	0.65	0.71	0.45	0.17	1.11	1.37	0.25	0.89	0.235	0.2475	0.6575	0.528985	0.404551	0.0838414	1	0.999631	0.549732
Agap2_Q3UHD9_S26s_1	-0.33	-0.34	-0.51	-1.42	0.25	-0.08	-0.47	-1.21	-0.25	0.26	-1.04	-1.2	-0.22	0.52	0.16	-0.89	0.2725	0.0925	0.5425	0.509588	0.82957	0.210164	1	0.999631	0.66441
Agap2_Q3UHD9_S33s_1	0.5	-0.3	-0.61	0.19	0.83	-0.08	0.66	0.34	-0.16	-0.35	-0.05	-0.43	-0.35	-0.16	-0.44	-0.42	0.4925	-0.1925	-0.2875	0.17964	0.552652	0.392722	1	0.999631	0.758901
Agap2_Q3UHD9_S349s_1	-0.41	1.58	1.53	-0.47	0.07	-0.01	-0.29	-0.79	0.32	0.51	0.76	1.6	1.6	-0.12	-0.23	1.83	-0.8125	0.24	0.2125	0.167233	0.683722	0.763275	1	0.999631	0.915608
Agap2_Q3UHD9_S368s_1	-0.31	0.06	-1.97	0.52	0.18	0.01	0.17	0.86	-0.27	-0.84	0.18	0.36	-1.89	-0.37	-1.18	-0.38	0.73	0.2825	-0.53	0.190609	0.615278	0.384035	1	0.999631	0.754721
Agap2_Q3UHD9_S424s_1	-1.14	-0.72	-0.91	-0.8	-0.36	-0.39	-1.05	-0.24	-0.17	-1.13	-0.38	0.09	-0.21	-0.27	0.05	-0.05	0.3825	0.495	0.7725	0.197223	0.156939	0.0162622	1	0.999631	0.388832
Agap2_Q3UHD9_S632s_1	0.29	1.16	-0.2	-0.23	1.38	0.14	0.51	0.28	-1.46	-0.81	0.25	0.93	0.51	1.4	0.87	1.35	0.3225	-0.5275	0.7775	0.451998	0.368772	0.0801642	1	0.999631	0.545579
Agap2_Q3UHD9_S642s_1	2.12	0.88	0.85	2.31	2.71	1.02	2.61	2.51	1.45	0.23	2.03	1.54	-0.1	1.11	0.41	1.72	0.6725	-0.2275	-0.755	0.215635	0.660364	0.173302	1	0.999631	0.642116
Agap2_Q3UHD9_S650s_1	2.37	-0.35	0.09	-0.62	-1.27	0.46	3.25	-3.9	-3.04	1.54	-2.49	-0.25	-0.08	-2.33	-0.73	-0.8	-0.7375	-1.4325	-1.3575	0.60106	0.205745	0.0882782	1	0.999631	0.553858
Agap2_Q3UHD9_S921s_1	-1	-0.3	-0.85	-0.79	-0.02	-0.4	-1.02	-0.59	-0.6	-1.15	-0.71	-0.7	-0.29	-0.36	-0.56	-0.46	0.2275	-0.055	0.3175	0.471376	0.847355	0.283911	1	0.999631	0.704942
Agap2_Q3UHD9_S99s_1	0.86	-1.53	-3.62	-1.03	0.29	-1.36	-0.34	0.83	0.78	-0.93	-0.67	-0.58	-0.53	0.12	-0.35	-2.11	1.185	0.98	0.6125	0.206095	0.275865	0.499668	1	0.999631	0.813279
Agap2_Q3UHD9_T350t_1	-0.26	-1.53	-0.44	-0.53	-0.29	-0.6	-0.94	-0.5	-0.28	0.21	-0.56	0.09	-0.77	-0.64	-0.51	0.11	0.1075	0.555	0.2375	0.75721	0.152355	0.537359	1	0.999631	0.830391
Agap2_Q3UHD9_T629t_1	0.45	-1.14	-1.98	-0.76	0.36	-1.4	-1.11	-0.68	-1.08	-0.75	-1.4	-0.83	0.2	-1.22	-1.38	-2.01	0.15	-0.1575	-0.245	0.795283	0.752725	0.69461	1	0.999631	0.895302
Agap2_Q3UHD9_T803t_1	0.08	1.2	0.54	-0.12	0.8	0.26	-0.33	-0.23	1.06	-0.12	-0.07	0.29	2.05	0.83	-0.3	0.9	-0.3	-0.135	0.445	0.456581	0.741619	0.408797	1	0.999631	0.766996
Agap3_Q8VHH5_S395s_1	1.93	-0.1	-0.89	2.37	1.24	0.37	1.91	1.19	0.5	0.26	2.03	-0.03	-2.17	-0.59	-0.66	-0.41	0.35	-0.1375	-1.785	0.639878	0.863345	0.0411126	1	0.999631	0.474979
Agap3_Q8VHH5_S478s_1	1.94	-0.58	-1.33	0.98	2.59	0.54	1.45	1.53	0.81	-0.12	0.76	-1.31	-2.98	0.29	-0.65	-1.23	1.275	-0.2175	-1.395	0.112971	0.781689	0.133859	1	0.999631	0.60492
Agap3_Q8VHH5_S573s_1	0.95	0.79	0.13	0.64	0.61	1.13	0.32	0.59	1.35	1.19	-0.01	0.77	0.14	0.85	0.83	0.45	0.035	0.1975	-0.06	0.908487	0.602171	0.853334	1	0.999631	0.950701
Agfg1_Q8K2K6_T177t_2	2.3	0.85	-0.39	2.67	2.45	2.05	2.77	2.26	1.96	0.65	2.22	0.9	-2.67	1.38	0.66	0.76	1.025	0.075	-1.325	0.135176	0.916112	0.199843	1	0.999631	0.657804
Agps_Q8C0I1_S52s_1	-1.11	-1.98	-0.91	-0.34	-1.82	-2.21	-0.58	-0.26	-2.17	-1.72	-0.29	0.11	-0.54	-1.84	-0.53	-1.13	-0.1325	0.0675	0.075	0.805061	0.908918	0.869427	1	0.999631	0.957915
Agps_Q8C0I1_S57s_1	-0.74	-0.64	-0.05	-0.49	-0.45	-0.55	-0.6	-0.26	-1.04	-1.42	-0.33	-0.05	-0.41	-0.61	-0.25	-0.38	0.015	-0.23	0.0675	0.955074	0.543621	0.815929	1	0.999631	0.93761
Ahctf1_Q8CJF7_S1218s_1	-0.48	-0.68	-0.6	-1.09	-0.46	-1.38	-0.62	-0.76	-0.64	-0.36	0.34	-0.1	0.64	-0.34	0.13	0.7	-0.0925	0.5225	0.995	0.759939	0.119066	0.0144203	1	0.999631	0.385092
Ahctf1_Q8CJF7_S1381s_1	1.03	1.57	-1.88	-1.03	0.7	2.08	-1.39	-2.92	1.64	1.98	-1.12	-2.13	1.93	1.65	-2.89	-1.58	-0.305	0.17	-0.145	0.795682	0.879442	0.905729	1	0.999631	0.969317
Ahctf1_Q8CJF7_S1507s_1	-0.63	-0.23	-0.97	-0.75	-0.85	-1.11	-1.06	-0.64	-1.1	-0.86	-1.57	-2.73	-0.11	-0.96	-1.23	-0.67	-0.27	-0.92	-0.0975	0.338983	0.0593895	0.778426	1	0.999631	0.921416
Ahcyl2_F8WGT1_S109s_1	-2.05	-0.21	-0.04	-0.52	-0.37	-0.13	-0.4	0.06	-0.3	-0.9	-0.32	0.32	1.05	0.41	0.25	1.73	0.495	0.405	1.565	0.291266	0.423013	0.0142327	1	0.999631	0.385092
Ahdc1_Q6PAL7_S1060s_1	-0.18	-0.51	-0.33	-0.03	-0.09	-0.51	-1.17	-0.86	-1.1	0.2	-0.3	-0.19	0.73	-0.15	-0.36	-0.31	-0.395	-0.085	0.24	0.221404	0.801755	0.485838	1	0.999631	0.804488
Ahdc1_Q6PAL7_S1180s_1	-0.41	0.18	0.06	0.03	-0.1	0.03	-0.44	0.27	0.13	-0.02	-0.16	0.91	-0.08	0.91	0.27	-0.36	-0.025	0.25	0.22	0.928535	0.450976	0.540225	1	0.999631	0.831295
Ahdc1_Q6PAL7_S1467s_1	1.23	-0.03	0.58	0.58	-0.31	-0.2	0.5	-0.09	-0.18	0.97	0.06	-0.39	-0.4	-0.55	-0.07	-0.93	-0.615	-0.475	-1.0775	0.100292	0.258084	0.0129158	1	0.999631	0.385092
Ahdc1_Q6PAL7_S892s_1	-0.29	-0.1	-0.22	-0.59	-0.08	-1.13	-0.4	-0.3	-1.6	-0.52	0.24	0.65	0.59	-0.83	0.13	0.2	-0.1775	-0.0075	0.3225	0.567068	0.987621	0.386934	1	0.999631	0.756701
Ahdc1_Q6PAL7_S99s_1	0.44	-0.71	0.38	1.42	-0.6	-0.7	0.78	0.72	-0.74	-0.32	0.09	1.39	-0.24	-1.45	0.48	1.08	-0.3325	-0.2775	-0.415	0.546589	0.634712	0.514109	1	0.999631	0.81893
Ahi1_E9QP54_S26s_1	2.58	-0.07	2.53	2	0.46	1.39	2.45	1.68	1.6	2.37	-0.73	1.08	0.97	1.17	2.16	0.45	-0.265	-0.68	-0.5725	0.69141	0.402659	0.385369	1	0.999631	0.756021
Ahi1_E9QP54_S974s_1	0.26	-1.47	1.04	-0.36	-0.51	-0.51	0.03	0.8	-0.06	0.05	-0.83	1.08	0.46	0.45	1.64	0.5	0.085	0.1925	0.895	0.879564	0.749057	0.134068	1	0.999631	0.60492
Ahi1_E9QP54_T122t_1	0.02	-2.8	0.37	-0.88	-1.9	-1.89	-0.13	0.38	-1.36	-0.53	-1.66	0.06	-0.69	-0.55	1.07	-0.45	-0.0625	-0.05	0.6675	0.938196	0.944561	0.367124	1	0.999631	0.745796
Ahi1_E9QP54_T5t_1	0.97	-0.15	-1.85	1.22	0.19	0.29	-1.08	-0.75	0.66	0.96	-3.21	-1.6	0.71	1.71	-0.49	-0.8	-0.385	-0.845	0.235	0.579526	0.425453	0.766716	1	0.999631	0.916961
Ahnak_E9Q616_S136s_1	0.68	1.08	-0.06	-0.56	0.97	0.47	-0.56	0.39	0.26	-0.47	0.08	0.02	-0.78	0.33	1.1	0.09	0.0325	-0.3125	-0.1	0.944295	0.450852	0.844065	1	0.999631	0.948381
Ahnak_E9Q616_S5504s_1	-0.68	0.02	-0.14	-0.04	-0.56	-0.1	-0.23	-0.55	0	0.58	-0.92	0.66	-0.79	-0.43	0.45	-0.05	-0.15	0.29	0.005	0.594126	0.482154	0.988908	1	0.999631	0.995427
Ahsa2_F6S1R2_S175s_1	1.48	-0.46	-0.85	0.89	2.17	0.82	1.31	0.77	0.26	-1.14	-0.56	-1.02	-1.06	0.82	-0.76	-0.24	1.0025	-0.88	-0.575	0.109173	0.154142	0.366322	1	0.999631	0.745796
Ahsg_P29699_S138s_1	1.74	2.39	1.52	2.29	2.04	3.08	1.73	1.71	1.98	1.35	1.94	2.23	2.45	3.31	2.69	2.75	0.155	-0.11	0.815	0.694078	0.74111	0.0358155	1	0.999631	0.453811
Aida_Q8C4Q6_S161s_1	-0.85	-0.86	-0.43	-0.83	-1	-1.2	-0.14	-0.51	-0.96	-1.23	-0.71	-1.19	-0.32	-1.06	-0.83	-0.54	0.03	-0.28	0.055	0.923792	0.31303	0.85432	1	0.999631	0.951263
Aimp1_Q3UZG4_S147s_1	0.68	1.48	1.04	0.7	0.93	1.49	0.45	0.37	1.43	2.06	0.81	1.4	0.04	2.04	1.2	1.1	-0.165	0.45	0.12	0.638198	0.222712	0.789858	1	0.999631	0.925678
Aimp2_Q8R010_S36s_1	-0.25	0.18	-1.41	-0.73	0.27	-0.37	-0.85	-1	0.11	-0.17	-1.11	-0.39	0.36	0.3	-0.49	0.02	0.065	0.1625	0.6	0.88117	0.705758	0.166102	1	0.999631	0.63587
Akap1_O08715_S101s_1	0.04	-0.03	-0.38	0.39	0.86	-0.12	0.65	0.23	0.45	-0.2	0.7	0	0.73	0.64	-0.73	0.21	0.4	0.2325	0.2075	0.22833	0.472745	0.602761	1	0.999631	0.857278
Akap1_O08715_S428s_1	1.38	0.5	-1.89	-0.29	0.37	0.4	-0.22	-1.08	0.98	1.39	-1.11	-1.18	2.25	0.3	-1.66	-0.62	-0.0575	0.095	0.1425	0.933354	0.910709	0.878235	1	0.999631	0.962347
Akap1_O08715_S55s_1	0.26	-0.15	-0.04	0.37	0.44	-0.11	0.31	0.54	0.27	-0.34	0.12	0.28	0.19	0.53	0.18	0.44	0.185	-0.0275	0.225	0.506156	0.922667	0.433859	1	0.999631	0.779621
Akap1_O08715_T487t_1	-0.42	-1.03	-0.24	-0.59	-0.3	-1.05	-0.59	-0.37	-0.69	-0.55	-0.51	-0.44	0.32	-0.4	-0.69	0.22	-0.0075	0.0225	0.4325	0.980123	0.93533	0.237293	1	0.999631	0.683301
Akap10_O88845_S187s_1	0.07	0.08	-0.24	0.48	0.82	0.8	0.61	0.45	0.69	-0.24	0.76	-0.58	-0.76	0.47	0.35	-0.07	0.5725	0.06	-0.1	0.0545917	0.876326	0.782967	1	0.999631	0.92257
Akap10_O88845_S281s_1	1.18	1.62	-0.33	0.87	1.96	1.76	1.8	1.23	1.83	1.04	0.83	0.09	-0.01	1.82	0.74	-0.76	0.8525	0.1125	-0.3875	0.0750504	0.827859	0.539015	1	0.999631	0.830899
Akap11_E9Q777_S910s_1	0.54	-0.11	-1.56	-0.97	0.06	-1.01	-1.12	-0.73	0.42	0.37	-0.82	-0.85	1.03	0.48	-0.15	-1.31	-0.175	0.305	0.5375	0.727404	0.577182	0.394469	1	0.999631	0.759319
Akap11_E9Q777_S912s_1	0.54	-0.11	-1.56	-0.97	0.06	-1.01	-1.12	-0.73	0.42	0.37	-0.82	-0.85	1.03	0.48	-0.15	-1.31	-0.175	0.305	0.5375	0.727404	0.577182	0.394469	1	0.999631	0.759319
Akap12_Q9WTQ5_S1292s_1	-0.46	-0.62	0.87	0	-1.14	-0.95	0.28	0.43	-0.28	-0.41	-0.82	0.73	0.62	-0.55	1.16	-0.28	-0.2925	-0.1425	0.29	0.558238	0.755892	0.563207	1	0.999631	0.841038
Akap12_Q9WTQ5_S1645s_1	0.24	-0.74	0.38	-0.02	-0.89	-0.41	0.69	-0.28	-0.77	0.15	-0.9	-0.42	0.15	-0.7	0.25	0.11	-0.1875	-0.45	-0.0125	0.651593	0.242036	0.973244	1	0.999631	0.990577
Akap12_Q9WTQ5_S234s_1	-0.48	0.71	0.5	0.88	0.55	0	0.34	0.92	0.51	-0.03	1	1.69	0.73	0.51	1.25	1.8	0.05	0.39	0.67	0.894099	0.407825	0.141	1	0.999631	0.61245
Akap12_Q9WTQ5_S270s_1	-1.76	-2.89	-0.07	-0.08	-2.41	-2.52	-0.39	-0.04	-2.61	-2.01	0.1	0.76	-0.22	-2.01	1.33	0.93	-0.14	0.26	1.2075	0.865601	0.778711	0.190335	1	0.999631	0.648674
Akap12_Q9WTQ5_S350s_1	-0.11	0.33	0.43	0.12	0.28	0.15	0.13	0.07	0.42	0.4	0.48	0.69	0.98	0.64	0.78	0.51	-0.035	0.305	0.535	0.888437	0.259844	0.0842384	1	0.999631	0.549732
Akap12_Q9WTQ5_S467s_1	-0.97	-1.04	-1.92	-1.67	-0.76	-1.03	-1.16	-1.59	-1.13	-0.83	-1.68	-1.04	-0.38	-0.91	-1.36	-0.98	0.265	0.23	0.4925	0.43193	0.50509	0.191247	1	0.999631	0.648674
Akap12_Q9WTQ5_S507s_1	0.05	0.92	-0.34	0.53	1.98	1.27	0.75	0.5	1.68	-0.55	0.99	0.61	-1.13	2.38	0.93	0.6	0.835	0.3925	0.405	0.0722166	0.449596	0.558484	1	0.999631	0.838464
Akap12_Q9WTQ5_S543s_1	-0.39	0.68	1.82	1.06	0.81	0.91	0.65	1.24	0.72	1.73	0.72	2.16	0.05	1.25	2.39	2.3	0.11	0.54	0.705	0.810266	0.334411	0.287853	1	0.999631	0.705972
Akap12_Q9WTQ5_S584s_1	-0.76	0.01	-0.2	-1.24	-0.29	-0.33	-0.69	-0.33	-0.19	-0.15	-0.65	0.07	-0.22	-0.21	0.13	-0.28	0.1375	0.3175	0.4025	0.683036	0.38245	0.269565	1	0.999631	0.697839
Akap12_Q9WTQ5_S598s_1	1.07	1.95	1.29	1.75	2.52	1.41	1.35	2.31	2.75	1.21	2.47	3.35	0.81	3.08	3.48	2.88	0.3825	0.93	1.0475	0.324989	0.0751051	0.0950209	1	0.999631	0.558128
Akap12_Q9WTQ5_S613s_1	-0.36	0.63	-0.13	-1.07	0.55	0.34	-0.98	-0.38	1.36	1.32	-1.07	-0.89	1.54	1.17	0.44	-1.08	0.115	0.4125	0.75	0.807416	0.546052	0.239949	1	0.999631	0.683719
Akap12_Q9WTQ5_S682s_1	2.62	1.05	0.97	1.05	0.36	1.59	2.27	0.67	0.41	2.86	0.01	-0.39	0.82	0.33	0.4	-0.91	-0.2	-0.7	-1.2625	0.71393	0.354061	0.0326758	1	0.999631	0.44294
Akap12_Q9WTQ5_S684s_1	1.87	-0.71	1.06	0.42	0.07	0.32	1.64	-0.44	-0.01	2.29	-0.75	-0.64	0.17	-0.37	0.15	-0.09	-0.2625	-0.4375	-0.695	0.678042	0.580552	0.206842	1	0.999631	0.660763
Akap12_Q9WTQ5_S786s_1	1.09	1.26	0.58	1.88	2.42	2.12	1.43	1.76	1.99	1	1.46	2.35	-0.08	2.02	1.99	1.98	0.73	0.4975	0.275	0.069308	0.24138	0.616063	1	0.999631	0.861203
Akap12_Q9WTQ5_S885s_1	2.38	-0.65	0.52	-0.28	-0.43	-0.37	0.61	-0.37	-0.03	0.78	0.03	-0.02	1.96	-1.41	0.16	-0.61	-0.6325	-0.3025	-0.4675	0.338217	0.635485	0.587106	1	0.999631	0.849999
Akap5_H3BIV5_S149s_1	-0.02	-0.34	-0.89	-0.39	-1.02	1.47	0.02	0.26	-2.01	-1.01	-0.4	-4.4	-2.19	0.34	-2.35	-1.83	0.5925	-1.545	-1.0975	0.259202	0.0747842	0.089096	1	0.999631	0.554748
Akap5_H3BIV5_S178s_1	-1	-0.68	-1.14	-0.26	-0.42	-0.8	-0.68	-0.38	-0.22	-0.98	-1.14	-1.04	-0.34	-0.35	-0.43	-0.62	0.2	-0.075	0.335	0.497218	0.823374	0.287425	1	0.999631	0.705972
Akap5_H3BIV5_S249s_1	1.07	-1.49	-1	-0.02	0.95	-0.68	0.27	-0.41	-0.8	-1.21	0.04	-0.52	-0.79	-1.03	-1.06	-0.54	0.3925	-0.2625	-0.495	0.522838	0.648745	0.370781	1	0.999631	0.746338
Akap5_H3BIV5_S258s_1	-0.13	-0.15	-0.24	-0.2	-0.27	-0.31	-0.79	-0.03	-0.31	-0.08	-0.56	-0.11	-0.43	0.28	-0.05	-0.16	-0.17	-0.085	0.09	0.522083	0.73765	0.750144	1	0.999631	0.91245
Akap5_H3BIV5_S269s_1	1.26	-2.13	-2.25	0.05	0.05	-0.78	0.4	-1.39	-0.43	-1.3	-0.01	-1.51	-1.13	-1.04	-1.74	-2.49	0.3375	-0.045	-0.8325	0.684018	0.955865	0.313131	1	0.999631	0.719861
Akap5_H3BIV5_S277s_1	-0.76	-1.3	-1.81	-1.46	-1.33	-1.53	-1.38	-2.14	-1.32	-1.11	-2.15	-2.07	-0.85	-0.79	-2.47	-1.94	-0.2625	-0.33	-0.18	0.433036	0.381848	0.697833	1	0.999631	0.895731
Akap5_H3BIV5_S29s_1	0.68	-0.68	-1.04	-1.13	-0.67	-0.52	-0.78	-1.57	-0.09	0.8	-1.45	-1.67	-0.2	-0.54	-1.08	-1.61	-0.3425	-0.06	-0.315	0.463583	0.926018	0.532026	1	0.999631	0.827588
Akap5_H3BIV5_S75s_1	2.33	-0.82	2.25	0.12	1.49	-0.66	4.85	-2.52	1.43	0.55	3.01	4.1	1.47	-1.78	1.63	-0.06	-0.18	1.3025	-0.655	0.90429	0.198887	0.499713	1	0.999631	0.813279
Akap5_H3BIV5_T227t_1	-1.08	-0.72	-0.85	-0.51	-0.74	-1.01	-1.08	-0.63	-0.8	-0.79	-1.13	-0.29	-0.38	-0.28	-0.5	-0.47	-0.075	0.0375	0.3825	0.775359	0.898195	0.185867	1	0.999631	0.646224
Akap6_E9Q9K8_S1070s_1	-1.24	-0.12	-0.26	-0.61	0.1	-0.31	-0.54	0.16	-0.07	-0.51	0.1	0.09	0.29	-0.16	-0.16	0.32	0.41	0.46	0.63	0.242421	0.19223	0.0918668	1	0.999631	0.557085
Akap6_E9Q9K8_S423s_1	-0.5	-1.85	-0.7	1.31	-1.2	-1.63	1.02	1.53	-1.13	-1.2	1.35	1.29	-2.73	-1.12	0.72	1.29	0.365	0.5125	-0.025	0.681906	0.549194	0.979282	1	0.999631	0.993455
Akap6_E9Q9K8_S480s_1	1.37	1.04	-0.31	1.74	1.8	1.37	1.24	1.47	1.75	0.94	1.76	0.99	-1.66	1.41	1.26	1.18	0.51	0.4	-0.4125	0.271077	0.414582	0.588293	1	0.999631	0.850634
Akap6_E9Q9K8_S533s_1	0.61	-0.27	-0.93	-0.01	0.5	-0.27	0.41	0.46	-0.49	-0.07	-0.46	-1.53	-0.57	0.47	0.26	-0.44	0.425	-0.4875	0.08	0.280006	0.284852	0.849524	1	0.999631	0.949525
Akap6_E9Q9K8_T2234t_1	0.37	0.12	0.12	0.41	-0.45	0.37	-0.27	0.73	-0.5	0.32	0.13	-0.18	-0.36	0.31	0.91	0.35	-0.16	-0.3125	0.0475	0.628257	0.290268	0.888268	1	0.999631	0.963505
Akap9_E9QQ10_T361t_1	-0.64	-0.78	-0.73	-1.46	-0.53	-0.38	-0.34	0.02	-0.67	-0.53	-0.85	0.03	0.16	-0.42	-0.16	0.36	0.595	0.3975	0.8875	0.0647981	0.238294	0.0210125	1	0.999631	0.400544
Akt1s1_E9QKI5_S118s_1	-1.33	-0.01	-0.3	-1.92	-2.43	-2.24	-1.52	-1.48	-2.35	-2.47	-1.58	-1.29	0.37	-1.48	-0.31	-1.11	-1.0275	-1.0325	0.2575	0.0553265	0.0636009	0.648606	1	0.999631	0.874615
Akt1s1_E9QKI5_S143s_1	-0.96	-0.2	-0.53	-0.54	-1.34	-0.16	-0.46	-0.56	-0.41	-0.35	-1.23	-0.39	0.17	-0.36	-0.15	-0.79	-0.0725	-0.0375	0.275	0.828425	0.907109	0.411873	1	0.999631	0.767937
Akt1s1_E9QKI5_S229s_1	-1.22	-0.84	-0.61	-1.57	-1.76	-1.2	-1.14	-1.71	-1.54	-0.9	0.2	0.45	1.16	-0.91	-1.16	-1.12	-0.3925	0.6125	0.5525	0.234833	0.23012	0.331587	1	0.999631	0.727302
Akt1s1_E9QKI5_S230s_1	-1.22	-0.84	-0.61	-1.57	-1.76	-1.2	-1.14	-1.71	-1.54	-0.9	0.2	0.45	1.16	-0.91	-1.16	-1.12	-0.3925	0.6125	0.5525	0.234833	0.23012	0.331587	1	0.999631	0.727302
Akt1s1_E9QKI5_S239s_1	-0.52	0.77	1.05	0.15	0.83	-0.02	0.55	-0.58	1	0.2	0.48	1.83	1.16	0.16	0.25	-0.66	-0.1675	0.515	-0.135	0.71198	0.298279	0.783823	1	0.999631	0.922628
Akt3_Q9WUA6_S34s_1	0.08	0.46	1.02	0.4	0.07	0.73	-0.08	0.18	-0.1	0.36	0.56	-0.53	0.83	0.61	0.96	1.05	-0.265	-0.4175	0.3725	0.408945	0.251838	0.247848	1	0.999631	0.685751
Akt3_Q9WUA6_T447t_1	-0.66	1.23	0.61	-0.9	1.54	-0.32	1.24	-0.49	2.42	-1.14	1.42	2.63	2.71	-0.42	-0.41	-0.44	0.4225	1.2625	0.29	0.521258	0.171614	0.722005	1	0.999631	0.905674
Alad_P10518_S215s_1	-0.83	-0.84	0.79	0.26	-0.48	-0.64	0.19	0.45	0	-0.09	0.47	1.05	0.23	-0.28	0.79	0.82	0.035	0.5125	0.545	0.93974	0.289138	0.265454	1	0.999631	0.694352
Aldh1a1_P24549_S2s_1	-0.44	0.01	-0.49	-0.71	0.14	-0.78	-1.05	-1.11	-0.72	-0.82	-0.57	-1.23	-0.18	-0.65	-0.16	-0.06	-0.2925	-0.4275	0.145	0.416441	0.16525	0.633959	1	0.999631	0.868569
Aldh1a1_P24549_S3s_1	-0.44	0.01	-0.49	-0.71	0.14	-0.78	-1.05	-1.11	-0.72	-0.82	-0.57	-1.23	-0.18	-0.65	-0.16	-0.06	-0.2925	-0.4275	0.145	0.416441	0.16525	0.633959	1	0.999631	0.868569
Aldh1l1_Q8R0Y6_T544t_1	-0.16	0.78	-0.15	-1.61	-1.39	1.01	-1.14	-1.29	0.03	0.28	-1.31	-1.38	0.18	1.89	-0.9	-0.92	-0.4175	-0.31	0.3475	0.53876	0.607878	0.634767	1	0.999631	0.868886
Aldoa_P05064_S39s_1	-0.54	-1.03	0.77	0.28	-0.69	-0.86	-0.2	0.56	-1.05	-0.86	0.68	0.55	-0.59	-0.44	0.48	1.03	-0.1675	-0.04	0.25	0.730782	0.943181	0.636108	1	0.999631	0.869397
Aldoa_P05064_S46s_1	-0.07	0.78	0.7	0.29	0.28	0.5	0.21	0.19	0.16	0.11	0.45	0.46	0.15	0.58	0.21	0.64	-0.13	-0.13	-0.03	0.650306	0.662964	0.924887	1	0.999631	0.975422
Aldoc_P05063_S36s_1	-0.22	0.93	0.95	0.49	0.79	0.35	-0.13	0.04	0.39	-0.06	0.12	0.63	0.24	-0.02	0.47	0.16	-0.275	-0.2675	-0.325	0.455142	0.453443	0.363407	1	0.999631	0.743747
Aldoc_P05063_S39s_1	0.6	0.79	0.18	-0.6	0.19	0.07	-0.89	-0.43	-0.56	0.06	-0.22	0.17	0.02	0.2	-0.15	0.5	-0.5075	-0.38	-0.1	0.223846	0.323107	0.790903	1	0.999631	0.926419
Aldoc_P05063_S45s_1	0.22	0.74	0.67	-0.36	0.09	0.55	-0.03	-0.71	1.03	0.46	0.57	0.67	0.95	0.52	0.42	0.67	-0.3425	0.365	0.3225	0.37523	0.28776	0.356892	1	0.999631	0.740719
Alkbh3_Q8K1E6_S28s_1	1.51	0.46	0.57	0.99	2.28	1.88	1.92	0.51	2.13	-0.39	0.44	-0.69	-3.16	-0.47	0.16	-1.92	0.765	-0.51	-2.23	0.109483	0.414526	0.00882665	1	0.999631	0.365244
Alkbh5_Q3TSG4_S362s_1	0.79	2.37	1.63	1.02	0.66	2.32	1.07	1.34	2.01	2.01	2.02	0.98	1.65	2.52	1.37	2.98	-0.105	0.3025	0.6775	0.825064	0.492404	0.191804	1	0.999631	0.648674
Alkbh5_Q3TSG4_S385s_1	0.46	1.68	0.39	0.43	0.65	1.45	0.33	0.47	0.97	1.34	0.71	0.71	2.12	1.66	0.94	1.14	-0.015	0.1925	0.725	0.970351	0.608336	0.110805	1	0.999631	0.576275
Alkbh5_Q3TSG4_S65s_1	2.5	2.54	3.12	2.44	1.2	3	2.22	1.07	2.3	3.64	1.66	1.34	1.4	1.65	1.73	0.79	-0.7775	-0.415	-1.2575	0.117154	0.419145	0.0035595	1	0.999631	0.351308
Als2_Q920R0_S1016s_1	-1.1	-0.16	-0.49	-0.27	0.15	-0.48	-0.82	-0.45	-0.27	-0.33	-0.69	-0.58	0.54	0.06	-0.48	-0.69	0.105	0.0375	0.3625	0.751894	0.901991	0.35432	1	0.999631	0.739951
Als2_Q920R0_S1329s_1	-1.76	0.07	1.04	-0.22	0.96	0.14	1.31	-0.67	2.39	-1.46	1.45	3.29	2.92	-0.81	0.78	0.16	0.6525	1.635	0.98	0.329544	0.133368	0.264967	1	0.999631	0.693784
Als2_Q920R0_S1458s_1	-0.91	-0.57	-1.05	-1.2	-0.98	-0.15	-0.86	-1.06	-0.61	-0.63	-2.07	-0.78	-2.15	0.21	-0.19	-0.34	0.17	-0.09	0.315	0.58166	0.818612	0.543346	1	0.999631	0.832881
Als2_Q920R0_S460s_1	-0.11	1.03	0.97	0.88	0.83	1.06	0.86	0.82	0.85	0.88	1.03	0.79	0.38	1.29	0.75	1.7	0.2	0.195	0.3375	0.538457	0.555658	0.422369	1	0.999631	0.773293
Als2_Q920R0_S477s_1	-1.29	-0.23	0.97	0.32	-0.54	0.06	-1.17	-0.87	0.71	-1.52	-2.61	0.64	0.25	-0.82	0.76	0.9	-0.5725	-0.6375	0.33	0.277387	0.45055	0.565462	1	0.999631	0.84139
Als2_Q920R0_S486s_1	-1.55	-0.78	-0.88	-1.03	-1.62	-0.93	-1.3	-0.81	-1.8	-0.77	-0.59	-0.28	-0.26	-0.75	-1.04	0.01	-0.105	0.2	0.55	0.733864	0.609409	0.138983	1	0.999631	0.611718
Als2_Q920R0_T504t_1	-0.75	-0.87	-0.4	-0.63	-1.01	-0.86	-0.41	-0.33	-0.72	-0.89	-0.28	0.34	0.05	-0.33	0.04	-0.1	0.01	0.275	0.5775	0.971283	0.424894	0.0594385	1	0.999631	0.50521
Amer2_Q8CCJ4_S223s_1	-0.09	2.23	1.78	1.05	0.59	2.1	0.38	1.52	1.72	1.82	0.95	2.24	-0.33	2.72	1.69	2.23	-0.095	0.44	0.335	0.871342	0.419032	0.651824	1	0.999631	0.876813
Amer2_Q8CCJ4_S227s_1	0.05	0.8	0.36	0.35	0.69	0.81	-0.18	-0.1	0.5	0.26	0.67	0.47	1.17	0.92	0.02	0.73	-0.085	0.085	0.32	0.801476	0.759294	0.369902	1	0.999631	0.746338
Amer2_Q8CCJ4_S244s_1	2.12	0.08	1.31	0.96	-0.27	-0.13	1.16	0.28	-0.2	1.48	-0.32	-0.27	-0.55	-0.91	-0.02	-0.16	-0.8575	-0.945	-1.5275	0.110305	0.116882	0.00752023	1	0.999631	0.358173
Amer2_Q8CCJ4_S269s_1	1.32	2.13	0.92	-0.45	2.1	1.47	1.69	0.42	1.85	-0.74	2.18	1.3	1.93	0.48	0.17	-1.48	0.44	0.1675	-0.705	0.46007	0.823199	0.372031	1	0.999631	0.746837
Amer2_Q8CCJ4_S280s_1	-0.68	-0.86	-0.61	-0.9	-0.76	-1.09	-0.97	-0.82	-1.14	-0.71	-0.64	-0.48	-0.06	-0.68	-0.71	-0.45	-0.1475	0.02	0.2875	0.544836	0.94069	0.330942	1	0.999631	0.727302
Amer2_Q8CCJ4_S71s_1	-0.14	-0.29	-0.85	-0.06	0.52	0.34	-0.26	-0.22	0.12	-0.42	-0.33	0.15	-0.27	0.39	-0.11	0.04	0.43	0.215	0.3475	0.195049	0.485693	0.285481	1	0.999631	0.705851
Amer2_Q8CCJ4_S98s_1	-0.69	-0.08	-1.15	-0.02	-0.19	-0.7	-0.25	-0.36	-0.85	-0.77	-0.85	-0.49	-1.33	0	-0.83	-0.47	0.11	-0.255	-0.1725	0.74082	0.450034	0.674006	1	0.999631	0.885515
Amer2_Q8CCJ4_T100t_1	-0.69	-0.08	-1.15	-0.02	-0.19	-0.7	-0.25	-0.36	-0.85	-0.77	-0.85	-0.49	-1.33	0	-0.83	-0.47	0.11	-0.255	-0.1725	0.74082	0.450034	0.674006	1	0.999631	0.885515
Amer3_Q6NS69_S17s_1	1.13	0.17	-0.35	1.22	1.43	0.62	1.39	0.43	0.5	-0.63	0.48	-0.35	-2.15	0.38	-0.73	0.07	0.425	-0.5425	-1.15	0.352295	0.259351	0.0867037	1	0.999631	0.553514
Amot_Q8VHG2_S1083s_1	1.06	0	-0.43	-0.4	-0.75	0.38	-0.02	0.01	-0.19	-0.8	0.14	0.19	-0.05	0.15	0.48	0.79	-0.1525	-0.2225	0.285	0.715855	0.598646	0.494356	1	0.999631	0.81007
Amot_Q8VHG2_S149s_1	1.2	0.18	-0.28	0.41	0.55	0.61	1.5	0.44	0.4	1.27	-0.14	-0.13	-1.33	-0.5	0.16	-1.15	0.3975	-0.0275	-1.0825	0.331859	0.950821	0.0363483	1	0.999631	0.453963
Amot_Q8VHG2_S693s_1	-0.87	-0.18	-0.88	-1.08	-0.18	-0.34	-1	-1.14	-0.44	-0.57	-0.78	0.1	0.34	0.43	-1.04	0.29	0.0875	0.33	0.7575	0.798514	0.325583	0.0931533	1	0.999631	0.558128
Amotl1_Q9D4H4_S645s_1	1.4	-0.67	-0.05	-0.02	-0.48	0.23	0.9	-2.12	-0.74	1.2	-1.35	0.05	-0.15	-0.81	0.15	-0.91	-0.5325	-0.375	-0.595	0.449532	0.558351	0.242097	1	0.999631	0.684914
Amotl2_B8JK81_S50s_1	0.69	-0.24	0.7	0.56	-0.15	-0.05	0.16	0.02	-0.03	1.09	-0.11	0.37	0.31	-0.04	0.66	0.37	-0.4325	-0.0975	-0.1025	0.169744	0.796611	0.760503	1	0.999631	0.914614
Amotl2_B8JK81_S51s_1	0.69	-0.24	0.7	0.56	-0.15	-0.05	0.16	0.02	-0.03	1.09	-0.11	0.37	0.31	-0.04	0.66	0.37	-0.4325	-0.0975	-0.1025	0.169744	0.796611	0.760503	1	0.999631	0.914614
Ampd2_A2AE27_S3s_1	-0.22	-1.23	-1.16	-1.54	-1.23	-0.28	-0.65	-3.78	-1.72	1.02	-1.6	-1.59	-1.37	-0.11	-0.62	0.35	-0.4475	0.065	0.6	0.548295	0.920339	0.211929	1	0.999631	0.665857
Ampd2_Q9DBT5_S12s_1	0.01	-0.38	0.3	0.8	0.69	0.1	0.48	1.33	0.15	-0.55	0.64	1.01	-0.51	0.78	1.26	0.1	0.4675	0.13	0.225	0.230466	0.758253	0.62405	1	0.999631	0.863524
Ampd2_Q9DBT5_S19s_1	1.29	0.21	-0.24	1.43	1.94	0.91	1.34	1.2	0.86	-0.05	0.73	0.45	-1.33	0.86	0.69	0.72	0.675	-0.175	-0.4375	0.154968	0.696834	0.474813	1	0.999631	0.799827
Ampd2_Q9DBT5_S53s_1	2.25	1.91	0.2	2.81	2.92	2.18	2.05	2.29	2.75	1.57	1.95	1.54	-1.75	1.97	1.58	1.88	0.5675	0.16	-0.8725	0.31285	0.781873	0.348881	1	0.999631	0.736697
Ampd2_Q9DBT5_S87s_1	1.18	1.07	1.37	1.22	0.82	0.91	0.57	0.51	0.95	1.41	0.92	0.99	0.05	0.63	0.46	0.86	-0.5075	-0.1425	-0.71	0.061656	0.584921	0.0342743	1	0.999631	0.446273
Ampd3_O08739_S85s_1	0	1.76	0.95	0.85	0.69	0.95	0.25	0.61	1.1	0.51	0.63	1.49	0.38	1.81	0.37	0.87	-0.265	0.0425	-0.0325	0.506834	0.920414	0.945963	1	0.999631	0.982217
Amph_Q7TQF7_S244s_1	0.5	1.2	-0.26	0.95	0.85	0.69	0.57	1.67	0.52	-0.22	1.27	0.12	-0.67	0.39	0.15	0.87	0.3475	-0.175	-0.4125	0.402159	0.695781	0.371972	1	0.999631	0.746837
Amph_Q7TQF7_S250s_1	-0.66	-0.59	-0.47	-0.35	-0.2	-0.66	-0.82	-0.52	-0.43	-1.01	-0.53	0.02	-0.1	-0.91	-0.92	-0.06	-0.0325	0.03	0.02	0.899495	0.920074	0.951219	1	0.999631	0.984079
Amph_Q7TQF7_S252s_1	-0.75	-0.16	-0.44	-0.46	-0.34	-0.32	-0.82	-0.19	-0.85	-0.75	-0.36	-0.11	-0.33	-0.3	-0.36	0.26	0.035	-0.065	0.27	0.897821	0.824581	0.376052	1	0.999631	0.748307
Amph_Q7TQF7_S262s_1	-0.88	0.23	-0.43	-3.43	-1.46	-0.95	-3.27	-2.86	-0.89	-0.47	-2.59	-1.19	1.39	-0.43	-1.51	-0.96	-1.0075	-0.1575	0.75	0.251404	0.845727	0.402595	1	0.999631	0.763968
Amph_Q7TQF7_S262s_2	-1.4	-0.18	-0.46	-0.62	-0.9	-0.52	-0.86	-0.44	-0.56	-0.86	-0.73	0.19	-0.25	-0.27	-0.2	-0.3	-0.015	0.175	0.41	0.963559	0.64321	0.236527	1	0.999631	0.683301
Amph_Q7TQF7_S272s_1	-0.37	-0.32	-0.78	-0.23	-0.24	-0.55	-0.36	-1.2	-0.42	-0.86	-1.5	-0.52	-0.48	-0.55	-1.05	-0.29	-0.1625	-0.4	-0.1675	0.596979	0.239673	0.584345	1	0.999631	0.849121
Amph_Q7TQF7_S272s_2	-1.45	-0.33	-0.56	-0.67	-0.91	-0.65	-0.88	-0.5	-0.59	-0.78	-0.65	0.15	-0.28	-0.29	-0.26	-0.3	0.0175	0.285	0.47	0.955535	0.431687	0.168047	1	0.999631	0.637399
Amph_Q7TQF7_S500s_1	-0.38	-0.72	-0.47	-0.78	-0.94	-0.69	-0.88	-0.88	-0.88	-0.58	-0.73	-0.63	0.06	-0.6	-0.58	-0.19	-0.26	-0.1175	0.26	0.300877	0.645667	0.390567	1	0.999631	0.758901
Amph_Q7TQF7_T260t_1	0.44	1.12	-1.58	-2.18	1.02	0.06	-2.67	-1.94	1.34	1.67	-1.08	-1.25	2.15	2.09	-1.56	-1.33	-0.3325	0.72	0.8875	0.740719	0.458962	0.428923	1	0.999631	0.776616
Anapc5_Q3TWF7_T217t_1	0.2	-0.06	-1.31	-0.15	0.01	-0.47	-0.57	0.57	0.39	-0.05	-0.65	0.02	0.98	-0.28	0.4	0.1	0.215	0.2575	0.63	0.611379	0.531543	0.168797	1	0.999631	0.637839
Ank1_Q02357_S1804s_1	1.56	-0.22	0.38	0.47	-0.63	-0.17	0.72	-0.41	-0.84	0.59	-1.08	-1.18	-0.74	-1.18	-0.4	-1.1	-0.67	-1.175	-1.4025	0.164972	0.0451663	0.00742569	1	0.999631	0.358173
Ank1_Q02357_S897s_1	0.27	0.13	-0.59	-0.17	-0.03	0.26	-0.27	-0.09	-0.22	-0.26	-0.72	-1.17	-1.71	0.08	-0.65	-0.45	0.0575	-0.5025	-0.5925	0.843287	0.16172	0.188791	1	0.999631	0.648316
Ank1_Q02357_T1421t_1	1.39	1.48	-1.53	0.61	0.85	-0.02	-0.01	0.33	0.46	-0.64	-0.84	-0.45	0.04	-0.11	-1.08	-0.04	-0.2	-0.855	-0.785	0.759168	0.225895	0.256862	1	0.999631	0.691567
Ank1_Q02357_T907t_1	-1	-0.89	-1.73	-0.97	-0.5	-1.41	-0.58	-0.97	-1.05	-0.57	-1.07	-0.99	-0.31	0.01	-1.53	-1.17	0.2825	0.2275	0.3975	0.39895	0.458701	0.357441	1	0.999631	0.740986
Ank2_Q8C8R3_S1454s_1	-0.68	0.18	-0.04	-0.17	-0.34	-0.61	-0.53	0.36	-0.45	-0.2	-0.32	0.37	0.05	-0.38	-0.19	0.46	-0.1025	0.0275	0.1625	0.755559	0.931032	0.624985	1	0.999631	0.863768
Ank2_Q8C8R3_S1456s_1	-0.75	0.15	0.04	-0.15	-0.25	-0.1	-0.28	0.14	-0.43	0	-0.11	0.39	0.47	0.02	-0.11	0.54	0.055	0.14	0.4075	0.850702	0.664357	0.236038	1	0.999631	0.683301
Ank2_Q8C8R3_S1727s_1	0.15	-1.42	-0.07	-0.55	-2.76	-1.24	-0.31	-1.8	-1.23	0.51	-0.54	-1.27	-1.53	-2.56	-1.05	-2.08	-1.055	-0.16	-1.3325	0.0871156	0.754853	0.0164731	1	0.999631	0.389192
Ank2_Q8C8R3_S1727s_2	-2.01	-2	0.21	-2.03	-2.61	-1.52	-2.25	-2.81	-1.35	-0.1	-1.4	-1.26	0.36	-2.21	-0.66	-2.86	-0.84	0.43	0.115	0.162984	0.467329	0.885755	1	0.999631	0.963505
Ank2_Q8C8R3_S1728s_1	0.27	-1.56	-1.53	-0.66	-1.38	-0.72	-1.2	-1.16	-1.22	0.88	-2.05	-2.47	-0.74	-2.11	-3.23	-2.5	-0.245	-0.345	-1.275	0.582847	0.651652	0.0612057	1	0.999631	0.509355
Ank2_Q8C8R3_S1728s_2	-2.01	-2	0.21	-2.03	-2.61	-1.52	-2.25	-2.81	-1.35	-0.1	-1.4	-1.26	0.36	-2.21	-0.66	-2.86	-0.84	0.43	0.115	0.162984	0.467329	0.885755	1	0.999631	0.963505
Ank2_Q8C8R3_S1731s_1	1.91	0.14	0.7	1.09	0.18	1.06	1.61	0.22	0.76	1.87	0.29	-0.28	-1.78	-0.74	0.2	-0.92	-0.1925	-0.3	-1.77	0.690227	0.585664	0.00645648	1	0.999631	0.351545
Ank2_Q8C8R3_S1750s_1	1.1	-0.87	-1.89	0.79	1.41	-0.42	0.67	0.62	0.39	-0.87	-0.07	-0.8	-1.91	-0.65	-0.88	-0.77	0.7875	-0.12	-0.835	0.280977	0.861005	0.237175	1	0.999631	0.683301
Ank2_Q8C8R3_S1805s_1	-1.09	1.49	2.59	-0.22	2.36	1.04	2.81	1.22	3.18	-0.31	3.18	4.31	2.31	-0.71	1.62	0.01	1.165	1.8975	0.115	0.175175	0.114381	0.901708	1	0.999631	0.968183
Ank2_Q8C8R3_S1821s_1	0.22	2.53	1.63	0.66	6.15	2.83	5.19	3.32	6.7	-0.46	6.03	6.74	3.68	0.77	3.35	0.3	3.1125	3.4925	0.765	0.00344936	0.0450977	0.390171	1	0.999631	0.758901
Ank2_Q8C8R3_S1835s_1	-0.16	3.34	2.11	-0.1	4.87	1.7	3.25	0.93	6.23	0.01	3.33	4.5	5.13	1.44	1.01	1.45	1.39	2.22	0.96	0.207045	0.122068	0.391567	1	0.999631	0.758901
Ank2_Q8C8R3_S1844s_1	-0.4	-0.56	-1.11	-0.76	-0.09	-0.21	-0.58	-0.83	-0.43	-0.36	-0.44	-0.54	0.03	-0.1	-0.5	-0.44	0.28	0.265	0.455	0.354887	0.337171	0.155417	1	0.999631	0.626444
Ank2_Q8C8R3_S1847s_1	-0.09	-0.56	-0.52	0.07	-0.06	-0.47	-0.09	-0.31	-0.86	-0.25	0.14	-0.18	-0.35	-0.32	0.18	0.37	0.0425	-0.0125	0.245	0.876278	0.968854	0.452374	1	0.999631	0.788364
Ank2_Q8C8R3_S1856s_1	1.31	0.2	-0.98	-0.24	0.6	0.23	-0.11	-0.02	1.22	1.53	-0.2	0.18	0.82	0.32	-0.25	-0.38	0.1025	0.61	0.055	0.830472	0.30677	0.916062	1	0.999631	0.973495
Ank2_Q8C8R3_S1870s_1	0.85	3.23	4.78	2.54	5.06	2.98	6.65	-1.17	5.87	0.04	5.39	6.89	6.79	-0.4	5.62	-0.11	0.53	1.6975	0.125	0.739547	0.267414	0.94184	1	0.999631	0.981463
Ank2_Q8C8R3_S1879s_1	-1.79	-0.04	-0.68	-1.11	0.18	-0.25	-0.18	-0.03	1.06	-1.67	0.83	1.26	1.7	-0.26	0.51	-0.43	0.835	1.275	1.285	0.0543729	0.0910757	0.0427956	1	0.999631	0.475443
Ank2_Q8C8R3_S1893s_1	1.98	2.36	1.02	-0.96	3.81	2.32	4.48	-1.63	5.54	1.75	0.95	2.22	4.12	-0.55	-1.32	-2.5	1.145	1.515	-1.1625	0.396629	0.181928	0.405499	1	0.999631	0.765965
Ank2_Q8C8R3_S1953s_1	-0.51	-0.41	1.09	-0.19	1.21	-0.36	1.29	-0.93	1.96	-0.46	1.05	2.6	1.13	-0.37	1.23	-0.15	0.3075	1.2925	0.465	0.613953	0.0819865	0.387079	1	0.999631	0.756701
Ank2_Q8C8R3_S1964s_1	0.56	-0.36	-0.91	0.19	0.42	-0.27	0.3	0.17	0.03	-0.25	0.1	0.1	-1.2	-0.16	0.06	-0.01	0.285	0.125	-0.1975	0.451001	0.731494	0.654781	1	0.999631	0.878941
Ank2_Q8C8R3_S2118s_1	-1.88	-0.57	0.62	-0.49	-1.27	-1.48	-0.26	-0.55	-1.1	-1.76	0.44	0.99	-1	-1.29	0.35	0.08	-0.31	0.2225	0.115	0.569915	0.760439	0.846398	1	0.999631	0.948838
Ank2_Q8C8R3_S2163s_1	2.15	-0.38	-1.44	1.14	1.57	-0.54	1.62	0.94	0.12	-1.43	-0.2	-0.91	-1.03	-0.21	-0.87	-0.67	0.53	-0.9725	-1.0625	0.522907	0.223769	0.162551	1	0.999631	0.631442
Ank2_Q8C8R3_S2204s_1	1.16	0.96	-0.21	0.35	0.54	-0.01	-0.22	-0.13	0.23	0.06	-0.16	-0.78	-0.45	0.63	0.24	0.17	-0.52	-0.7275	-0.4175	0.183702	0.0907694	0.315179	1	0.999631	0.72069
Ank2_Q8C8R3_S2266s_1	-0.03	0.1	-0.41	-0.71	-0.49	-0.03	-0.73	-0.63	-0.31	0.22	-0.66	-0.29	0.6	-0.04	-0.21	-0.47	-0.2075	0.0025	0.2325	0.497417	0.993739	0.511482	1	0.999631	0.817687
Ank2_Q8C8R3_S2392s_1	-0.68	-0.72	-0.9	-0.95	-0.66	-0.87	-1.14	-0.74	-0.52	-0.29	-0.69	-0.45	0.18	-0.28	-0.49	-0.39	-0.04	0.325	0.5675	0.872046	0.215105	0.0713528	1	0.999631	0.531405
Ank2_Q8C8R3_S2450s_1	-0.65	-0.21	-2.19	-3.78	-0.17	-0.33	-2.3	-3.37	0.04	0.91	-1.64	-3.84	1.38	0.27	-4.46	-3.24	0.165	0.575	0.195	0.86469	0.614922	0.885589	1	0.999631	0.963505
Ank2_Q8C8R3_S2455s_2	-1.09	0.22	-0.02	-1.18	-1.42	-0.73	-0.86	0.17	-0.2	-0.61	-0.52	0.74	0.95	-0.57	-0.9	0	-0.1925	0.37	0.3875	0.68099	0.4305	0.457856	1	0.999631	0.790722
Ank2_Q8C8R3_S2458s_2	-1.09	0.22	-0.02	-1.18	-1.42	-0.73	-0.86	0.17	-0.2	-0.61	-0.52	0.74	0.95	-0.57	-0.9	0	-0.1925	0.37	0.3875	0.68099	0.4305	0.457856	1	0.999631	0.790722
Ank2_Q8C8R3_S2524s_1	-1.53	-1.36	-2.05	-2	-1.16	-1.43	-1.64	-1.86	-1.34	-1.24	-1.6	-1.64	-0.3	-0.82	-1.67	-1.62	0.2125	0.28	0.6325	0.477001	0.341149	0.135524	1	0.999631	0.607806
Ank2_Q8C8R3_S2739s_1	0.7	0.95	0.09	0.39	1.08	-0.21	0.41	-1.45	1.63	-0.1	1.12	1.75	0.37	0.84	-0.46	-0.48	-0.575	0.5675	-0.465	0.290744	0.228893	0.260818	1	0.999631	0.69271
Ank2_Q8C8R3_S2746s_1	0.6	0.35	1.19	0.65	0.87	0.57	0.58	1.17	1.6	1.07	1.93	2.3	1.17	0.17	1.97	0.99	0.1	1.0275	0.3775	0.73489	0.0148655	0.380813	1	0.999631	0.752619
Ank2_Q8C8R3_S2769s_1	0.08	-2.3	-0.79	-1.07	-1.98	-2.73	-1.15	-1.17	-2.15	-0.85	-1.89	-1.05	-1.58	-1.5	0.35	-2.11	-0.7375	-0.465	-0.19	0.212651	0.401358	0.771456	1	0.999631	0.919413
Ank2_Q8C8R3_S2783s_1	-1.71	-2.47	-2.06	-2.18	-2.45	-2.16	-1.69	-2.04	-2.29	-0.98	-2.76	-1.63	-1.01	-1.95	-2.45	-1.37	0.02	0.19	0.41	0.945388	0.653925	0.302932	1	0.999631	0.714978
Ank2_Q8C8R3_S27s_1	-0.64	0.4	0.6	-0.23	0.35	0.51	-0.63	0.27	0.33	0.39	-0.28	0.46	0.97	0.43	0.37	0.53	0.0925	0.1925	0.5425	0.813494	0.599168	0.158094	1	0.999631	0.628615
Ank2_Q8C8R3_S2852s_1	-0.13	-0.3	-1.38	-0.41	-0.2	-0.64	-0.6	-0.28	-0.27	-0.29	-0.29	-0.41	-0.15	-0.35	-1.2	-0.77	0.125	0.24	-0.0625	0.712621	0.477165	0.87373	1	0.999631	0.959802
Ank2_Q8C8R3_S2852s_2	-0.9	-0.26	0.8	1.01	0.19	-0.52	0.53	1.85	-0.29	-0.86	1.49	2.41	0.13	-0.19	2.03	2.03	0.35	0.525	0.8375	0.566158	0.505244	0.229	1	0.999631	0.679627
Ank2_Q8C8R3_S2855s_1	0.01	1.07	0.76	0.09	0.36	0.39	-0.38	0.5	0.39	0.89	0.53	1.08	2.44	0.99	1.06	1.04	-0.265	0.24	0.9	0.461126	0.492553	0.0640534	1	0.999631	0.513532
Ank2_Q8C8R3_S29s_1	-0.55	0.14	0.02	-0.51	-0.4	0.13	-0.57	-0.34	0.05	0.31	-0.35	0.06	0.73	0.2	-0.19	0.12	-0.07	0.2425	0.44	0.814206	0.427436	0.205838	1	0.999631	0.6605
Ank2_Q8C8R3_S3060s_1	-0.59	-0.43	-1.41	-0.73	0.97	0.21	-1.01	-0.99	0.88	-1.32	-0.97	-0.29	-0.26	-0.38	-0.82	-0.29	0.585	0.365	0.3525	0.257169	0.473873	0.296504	1	0.999631	0.709528
Ank2_Q8C8R3_S30s_1	-2.04	-0.19	0.11	-0.56	-0.41	-0.56	-0.58	0.15	-0.26	-1	0.1	0.04	0.31	-0.5	0.41	-0.26	0.32	0.39	0.66	0.509892	0.450938	0.208555	1	0.999631	0.66217
Ank2_Q8C8R3_S3218s_1	-0.2	-0.87	-0.69	0.06	0.15	-0.62	-0.43	0.23	-0.19	-1.25	-1.38	0.34	-0.32	-0.53	-0.64	-0.26	0.2575	-0.195	-0.0125	0.452537	0.671009	0.968619	1	0.999631	0.988771
Ank2_Q8C8R3_S3254s_1	-0.42	-1.07	-0.25	-0.64	-0.76	-0.73	-1.67	-0.35	-0.4	-0.71	-0.32	-2.21	0.69	-0.45	-0.62	-0.33	-0.2825	-0.315	0.4175	0.436345	0.500857	0.287427	1	0.999631	0.705972
Ank2_Q8C8R3_S3264s_1	0.83	0.56	-0.39	1.17	1.22	0.99	0.53	1.17	1.16	0.56	0.41	0.48	-0.06	1.13	0.43	1.03	0.435	0.11	0.09	0.271579	0.779551	0.837653	1	0.999631	0.946036
Ank2_Q8C8R3_S3343s_1	-0.3	-0.08	-0.79	-0.56	0.31	-0.57	-0.14	-0.03	-0.86	-0.37	0.17	-0.09	-0.77	-0.5	-1.2	-0.07	0.325	0.145	-0.2025	0.294728	0.657016	0.560096	1	0.999631	0.839805
Ank2_Q8C8R3_S3371s_1	-0.41	-0.77	-0.07	-0.64	-1.28	-0.69	-0.46	-1.12	-0.66	-0.14	-0.77	-1.26	-0.5	-1.6	-0.28	-0.68	-0.415	-0.235	-0.2925	0.193001	0.481212	0.437421	1	0.999631	0.781057
Ank2_Q8C8R3_S3390s_1	-0.2	0.6	0.26	-0.26	-0.36	0.18	-0.05	-0.12	0.77	0.82	0.8	0.75	1.31	0.24	0.73	0.67	-0.1875	0.685	0.6375	0.532201	0.0376792	0.0956897	1	0.999631	0.558128
Ank2_Q8C8R3_S3407s_1	0.15	-0.3	-0.71	0	0.14	-0.14	-0.4	-0.38	0	-0.09	-0.4	-0.07	-0.14	-0.27	-0.64	-0.14	0.02	0.075	-0.0825	0.945925	0.798	0.792695	1	0.999631	0.927581
Ank2_Q8C8R3_S3439s_1	0.71	-2.27	-0.83	-0.83	-1.53	-1.78	0.45	-1.69	-1.69	-0.83	-1.74	-1.55	-2.43	-3.06	-1.67	-3.24	-0.3325	-0.6475	-1.795	0.642918	0.287019	0.0168928	1	0.999631	0.391024
Ank2_Q8C8R3_S34s_1	-0.91	0.15	0.19	-0.2	-0.06	-0.09	-0.58	-0.04	0.12	-0.19	-0.15	0.36	0.66	-0.22	0.2	0.08	9.81308e-18	0.2275	0.3725	1	0.501594	0.316661	1	0.999631	0.720734
Ank2_Q8C8R3_S34s_2	-1.24	1.46	0.46	0.75	0.84	1.01	-0.16	0.9	1.28	0.3	0.58	1.05	1.7	1.18	0.79	0.99	0.29	0.445	0.8075	0.61705	0.439033	0.17143	1	0.999631	0.641657
Ank2_Q8C8R3_S3714s_1	-1.5	-0.8	-0.33	-0.99	-1.11	-1.48	-0.76	-0.68	-1.25	-1.54	-0.53	-0.29	-0.31	-0.85	-0.28	-0.12	-0.1025	0.0025	0.515	0.762879	0.994954	0.161449	1	0.999631	0.631442
Ank2_Q8C8R3_S3720s_1	-0.56	-0.84	-0.87	-1.08	-0.4	-0.6	-0.84	-0.49	-0.7	-0.88	-0.78	-0.64	-0.35	-0.14	-0.77	-0.61	0.255	0.0875	0.37	0.330677	0.731966	0.22417	1	0.999631	0.67471
Ank2_Q8C8R3_S3792s_1	-0.53	0.37	0.83	-0.29	-0.51	0.28	0.03	0.19	-0.04	0.31	0.72	0.51	1.06	0.41	1.08	1.3	-0.0975	0.28	0.8675	0.794388	0.461669	0.0484376	1	0.999631	0.48343
Ank2_Q8C8R3_S3808s_1	0.23	-3.04	-0.58	0.06	-3.31	-2.83	2.94	-3.05	-3.77	-0.86	-2.93	-1.48	-2.43	-3	-0.91	-2.38	-0.73	-1.4275	-1.3475	0.611772	0.128149	0.104052	1	0.999631	0.568213
Ank2_Q8C8R3_S3814s_1	-0.69	-0.73	-0.78	-0.66	-0.64	-0.79	-0.98	-0.61	-0.89	-0.88	-0.73	-0.69	-0.13	-0.63	-0.76	-0.44	-0.04	-0.0825	0.225	0.86625	0.731224	0.427235	1	0.999631	0.775206
Ank2_Q8C8R3_S3878s_1	2.33	1.12	0.18	1.87	0.56	1.06	1.1	0.4	0.64	1.27	0.24	0.41	-0.08	0.08	-0.04	-0.73	-0.595	-0.735	-1.5675	0.230877	0.161327	0.00874355	1	0.999631	0.365244
Ank2_Q8C8R3_S3879s_1	2.77	1.85	1.23	2.5	0.92	1.84	2.05	1.13	1.31	1.99	1.11	1.2	0.26	0.48	1.12	0.72	-0.6025	-0.685	-1.4425	0.184017	0.117746	0.00525662	1	0.999631	0.351308
Ank2_Q8C8R3_S3921s_1	1.76	-3.35	-1.8	-0.96	-1.9	-2.01	2.02	-3.14	-2.3	-0.17	-2.92	-2.37	-2.45	-3.18	-2.92	-2.45	-0.17	-0.8525	-1.6625	0.897685	0.428833	0.0991547	1	0.999631	0.562298
Ank2_Q8C8R3_S3s_2	-0.19	0.5	-0.73	-3.02	-0.39	-0.28	-0.01	0.68	-0.32	0.35	-0.82	-0.05	0.16	-0.89	-2.02	-0.08	0.86	0.65	0.1525	0.241975	0.371992	0.847315	1	0.999631	0.948838
Ank2_Q8C8R3_S44s_1	-0.64	0.11	-0.13	-0.7	-0.45	-0.04	-0.85	-0.7	-0.02	0.09	-0.3	-0.01	0.61	0.14	-0.34	-0.34	-0.17	0.28	0.3575	0.593183	0.354315	0.326305	1	0.999631	0.724678
Ank2_Q8C8R3_S49s_1	-0.91	0.15	0.19	-0.2	-0.06	-0.09	-0.58	-0.04	0.12	-0.19	-0.15	0.36	0.66	-0.22	0.2	0.08	9.81308e-18	0.2275	0.3725	1	0.501594	0.316661	1	0.999631	0.720734
Ank2_Q8C8R3_S49s_2	-1.24	1.46	0.46	0.75	0.84	1.01	-0.16	0.9	1.28	0.3	0.58	1.05	1.7	1.18	0.79	0.99	0.29	0.445	0.8075	0.61705	0.439033	0.17143	1	0.999631	0.641657
Ank2_Q8C8R3_S588s_1	-0.68	0.18	-0.14	-0.25	-0.34	-0.61	-0.72	0.03	-0.45	-0.2	-0.51	0.05	0.05	-0.38	-0.32	0.17	-0.1875	-0.055	0.1025	0.54116	0.85341	0.744291	1	0.999631	0.910233
Ank2_Q8C8R3_S590s_1	-0.82	0.02	-0.14	-0.41	-0.4	-0.24	-0.4	-0.16	-0.58	-0.09	-0.35	0.09	0.26	-0.15	-0.35	0.25	0.0375	0.105	0.34	0.892413	0.732217	0.303114	1	0.999631	0.714978
Ank2_Q8C8R3_S6s_2	-0.19	0.5	-0.73	-3.02	-0.39	-0.28	-0.01	0.68	-0.32	0.35	-0.82	-0.05	0.16	-0.89	-2.02	-0.08	0.86	0.65	0.1525	0.241975	0.371992	0.847315	1	0.999631	0.948838
Ank2_Q8C8R3_S7s_1	2.16	2.15	0.49	2.07	2.31	3.06	1.75	2.55	2.36	1.44	2.36	1.39	-0.98	2.56	1.98	1.32	0.7	0.17	-0.4975	0.15884	0.72079	0.521751	1	0.999631	0.820623
Ank2_Q8C8R3_S892s_1	1.69	0.32	-0.93	2.22	1.95	1.63	1.89	0.87	1.4	-0.14	0.98	-0.77	-1.96	0.87	-0.16	-0.24	0.76	-0.4575	-1.1975	0.271801	0.553219	0.15797	1	0.999631	0.628615
Ank2_Q8C8R3_S939s_1	3.16	-1.87	-2.76	2.1	1.26	-0.04	2.59	-0.31	0.22	-0.69	0.47	-1.56	-3.77	-1.86	-1.46	-2.55	0.7175	-0.5475	-2.5675	0.600453	0.675707	0.0718305	1	0.999631	0.532005
Ank2_Q8C8R3_T2123t_1	-0.19	-0.28	-1.7	0.84	0.35	-0.67	-0.18	-0.48	0.16	-1.07	-1.17	-0.81	-0.26	0.43	-1.22	-0.5	0.0875	-0.39	-0.055	0.867759	0.490147	0.923564	1	0.999631	0.975032
Ank2_Q8C8R3_T2260t_1	-0.21	-0.5	-0.28	-0.59	-0.92	-0.64	-0.75	-0.48	-0.85	-0.3	-0.51	-0.01	-0.07	-0.15	-0.2	-0.06	-0.3025	-0.0225	0.275	0.244316	0.937533	0.314499	1	0.999631	0.720156
Ank2_Q8C8R3_T2361t_1	-1.57	-0.83	-1.27	-0.7	-0.49	-1.34	-0.45	-0.69	-0.83	-1.62	-0.51	-0.57	-1.03	-1.02	-1.16	-0.86	0.35	0.21	0.075	0.302284	0.561751	0.807194	1	0.999631	0.935599
Ank2_Q8C8R3_T2570t_1	-0.79	-0.12	0.09	-0.01	-0.26	-0.18	-0.59	-0.17	-0.06	0.15	-0.36	0.21	0.88	0.1	0.03	0.33	-0.0925	0.1925	0.5425	0.751856	0.534839	0.135254	1	0.999631	0.607096
Ank2_Q8C8R3_T2805t_1	1.55	0.45	0.73	2.21	0.84	1.41	1.56	0.24	1.17	2.29	0.93	1.05	-1.68	-0.04	0.48	1.14	-0.2225	0.125	-1.26	0.641595	0.797325	0.0760873	1	0.999631	0.542138
Ank2_Q8C8R3_T3063t_1	0.43	0.66	0.21	0.78	-0.49	0.07	1.59	0.81	1.51	-0.44	0.61	0.67	-3.22	-1.63	0.74	-0.56	-0.025	0.0675	-1.6875	0.955896	0.872783	0.0440935	1	0.999631	0.475443
Ank2_Q8C8R3_T3078t_1	-0.41	-0.14	-0.61	-0.41	-0.05	-0.57	-0.79	-0.46	-0.08	-0.19	-0.38	-0.01	-0.23	-0.04	-0.55	-0.06	-0.075	0.2275	0.1725	0.783294	0.386262	0.546326	1	0.999631	0.834213
Ank2_Q8C8R3_T3746t_1	-1.45	-0.27	-0.62	-0.8	0.24	-0.7	0.01	-0.45	0.4	-1.49	-0.3	-0.02	0.28	-0.62	-0.33	-0.55	0.56	0.4325	0.48	0.137666	0.360315	0.209827	1	0.999631	0.66441
Ank2_Q8C8R3_T3767t_1	0.19	0.94	0.4	0.4	0.74	0.3	-0.22	0.43	0.83	0.74	0.21	1.08	1.75	1.01	0.65	1	-0.17	0.2325	0.62	0.587396	0.460677	0.0954643	1	0.999631	0.558128
Ank2_Q8C8R3_T3773t_1	-1	-0.77	0.42	-0.49	-1.2	-1.34	-0.69	-0.4	-1.08	-0.73	-0.11	0.11	0.51	-0.76	0.11	0.27	-0.4475	0.0075	0.4925	0.267487	0.985705	0.264639	1	0.999631	0.6935
Ank2_Q8C8R3_T3784t_1	-0.03	0.03	-0.51	-0.83	-0.38	0.35	-0.89	-0.9	0.04	0.45	-0.94	-0.52	0.39	0.4	-0.37	-0.11	-0.12	0.0925	0.4125	0.749268	0.81111	0.246168	1	0.999631	0.685751
Ank2_Q8C8R3_T3813t_1	-0.91	-0.74	-1.16	-0.85	-1.01	-1.26	-1.03	-0.88	-1.33	-1.25	-1.06	-0.68	-0.59	-0.95	-0.98	-0.58	-0.13	-0.165	0.14	0.600581	0.551266	0.618445	1	0.999631	0.861888
Ank2_Q8C8R3_T5t_1	-0.13	-1.54	-0.42	-2.36	-0.48	-0.88	-1.01	-1.74	-0.79	0.55	-0.79	-0.61	-1.7	-0.26	-0.48	-0.14	0.085	0.7025	0.4675	0.873492	0.229627	0.425778	1	0.999631	0.774624
Ank2_Q8C8R3_T5t_2	-0.19	0.5	-0.73	-3.02	-0.39	-0.28	-0.01	0.68	-0.32	0.35	-0.82	-0.05	0.16	-0.89	-2.02	-0.08	0.86	0.65	0.1525	0.241975	0.371992	0.847315	1	0.999631	0.948838
Ank3_A0A087WNU5_S1186s_1	-1.59	-3.07	-0.5	-0.39	-2.09	-3.1	-0.14	-1.44	-2.57	-2.2	-1.79	-1.37	-2.06	-3.46	-0.99	-0.63	-0.305	-0.595	-0.3975	0.693055	0.343439	0.611702	1	0.999631	0.859812
Ank3_A0A087WNU5_S1316s_1	-1.6	-0.15	0.01	-0.81	-0.49	-0.69	-0.81	-0.32	-0.39	-1.08	-0.35	-0.14	0.4	-0.59	-0.42	-0.98	0.06	0.1475	0.24	0.877931	0.727479	0.605505	1	0.999631	0.85817
Ank3_A0A087WNU5_S1338s_1	-0.05	0.84	0.31	-0.34	-0.39	-0.43	0.38	-1.22	-0.19	-0.09	-1.02	-0.27	0.42	-0.78	0.21	-1.28	-0.605	-0.5825	-0.5475	0.165612	0.132686	0.258945	1	0.999631	0.692624
Ank3_A0A087WNU5_S1378s_1	-1.93	-4.5	-5.11	-5.55	-3.82	-4.35	-3.75	-8.02	-4.27	-2.64	-4.98	-7.17	-3.85	-4.38	-6.98	-7.24	-0.7125	-0.4925	-1.34	0.527208	0.646218	0.20755	1	0.999631	0.6614
Ank3_A0A087WNU5_S1380s_1	1.04	-3.12	-1.96	-1.36	-2.65	-1.59	1.82	-4.05	-2.8	0.88	-2.04	-2.61	-1.53	-2.74	-2.87	-3.65	-0.2675	-0.2925	-1.3475	0.837064	0.781848	0.136067	1	0.999631	0.608909
Ank3_A0A087WNU5_S1390s_1	-0.43	0.49	0.89	0.56	0	-0.13	-0.09	0.4	0.44	-0.17	-0.4	0.23	0.75	-0.34	0.83	0.94	-0.3325	-0.3525	0.1675	0.342944	0.35112	0.692911	1	0.999631	0.894897
Ank3_A0A087WNU5_S2266s_1	1.17	2.33	2.14	0.77	1.48	2.65	1.06	1.13	1.7	2.32	1.74	1.2	1.35	1.62	1.61	2.65	-0.0225	0.1375	0.205	0.9637	0.75344	0.661204	1	0.999631	0.880543
Ank3_A0A087WNU5_S2266s_2	1.48	1.45	0.41	1.29	1.44	1.01	1.64	0.88	1.05	1.29	1.72	-0.12	-2.46	0.18	-0.05	0.99	0.085	-0.1725	-1.4925	0.804348	0.706365	0.0540853	1	0.999631	0.491994
Ank3_A0A087WNU5_S2704s_1	-0.14	2.11	0.32	1.06	1.86	0.25	0.61	0.85	1.89	-0.21	0.78	1	2.3	0.52	0.43	0.76	0.055	0.0275	0.165	0.920386	0.963166	0.783474	1	0.999631	0.922628
Ank3_A0A087WNU5_T2270t_1	-0.03	0.21	-0.41	-0.29	0.12	-0.34	0.16	-0.5	-0.18	0.13	0.17	0.27	0.32	-0.25	-0.63	0.02	-0.01	0.2275	-0.005	0.972326	0.414795	0.987682	1	0.999631	0.995409
Ank3_A0A087WNU5_T2270t_2	1.48	1.45	0.41	1.29	1.44	1.01	1.64	0.88	1.05	1.29	1.72	-0.12	-2.46	0.18	-0.05	0.99	0.085	-0.1725	-1.4925	0.804348	0.706365	0.0540853	1	0.999631	0.491994
Ank3_G5E8K5_S1648s_1	0.31	-1.2	-1.09	0.29	-0.35	-1.62	0.15	-0.09	-1.02	-1.64	-1.04	-1.43	-1.82	-0.38	-0.88	-0.73	-0.055	-0.86	-0.53	0.917453	0.0750465	0.301008	1	0.999631	0.714243
Ank3_G5E8K5_S1656s_1	2.44	2.06	-0.64	2.25	2.59	2.83	1.96	1.04	2.71	2.68	0.94	0.39	1.41	1.94	0.85	0.06	0.5775	0.1525	-0.4625	0.43676	0.853035	0.531559	1	0.999631	0.827175
Ank3_G5E8K5_S27s_1	0.13	1.05	1.01	-0.04	0.35	1.67	-0.22	0.26	0.9	0.79	0.1	0.85	0.43	1.35	0.72	0.97	-0.0225	0.1225	0.33	0.96196	0.741304	0.39662	1	0.999631	0.761029
Ank3_G5E8K5_S507s_1	0.07	0.65	-0.35	-0.32	0.05	0.89	0	1.23	0.19	0.07	-0.69	0.36	1.05	1.05	0.56	0	0.53	-0.03	0.6525	0.198205	0.933778	0.109139	1	0.999631	0.572424
Ank3_G5E8K5_S606s_1	-0.93	-1.01	-0.37	-1.5	-1.47	-1.11	-1.77	-2.15	-0.7	-1.41	-1.85	-1.08	0.19	-1.23	-1.9	-1.07	-0.6725	-0.3075	-0.05	0.0787575	0.409973	0.916962	1	0.999631	0.973513
Ank3_G5E8K5_S919s_1	-2.05	0.61	0.03	-1.95	0.02	-0.04	-0.92	-2.58	0.53	-0.95	-0.91	-0.16	0.38	-0.17	-0.78	-0.64	-0.04	0.4675	0.5375	0.959885	0.499558	0.419148	1	0.999631	0.772152
Ank3_G5E8K5_S921s_1	-0.76	0.93	-0.21	0.88	2.18	0.33	2.19	0.5	1.91	-2.57	1.08	0.97	-0.24	-0.04	-0.05	0.68	1.09	0.1375	-0.1225	0.0928909	0.883081	0.789604	1	0.999631	0.925593
Ank3_G5E8K5_T1201t_1	0.32	0.02	0.65	-0.37	-0.87	-0.36	-0.38	-0.13	-0.71	-0.13	-0.14	-0.06	0.13	-0.07	0.17	0.33	-0.59	-0.415	-0.015	0.0875806	0.217738	0.962331	1	0.999631	0.986642
Ank3_S4R162_S33s_1	0.57	1.94	1.14	0.12	1.11	2.71	1.21	0.44	2.19	1.1	0.75	1.01	1.53	0.69	0.58	-0.84	0.425	0.32	-0.4525	0.458979	0.513204	0.441046	1	0.999631	0.781983
Ank3_S4R162_S73s_1	0.39	-0.64	-1	-0.95	-1.21	-0.12	-0.37	-2.34	-1.65	0.12	-1.87	-2.24	-0.67	-1.58	-1.39	-1.75	-0.46	-0.86	-0.7975	0.409719	0.153081	0.0793852	1	0.999631	0.545579
Ank3_S4R162_S87s_1	0.73	0.23	-0.51	0.71	1.65	-0.17	0.5	0.85	0.62	-0.05	0.66	0.47	-0.46	0.26	0.09	0.59	0.4175	0.135	-0.17	0.373172	0.711782	0.666463	1	0.999631	0.88264
Ank3_S4R162_T32t_1	-0.59	-2.45	-1.54	-2.24	-0.4	-1.93	-0.64	-1.38	-0.25	-1.05	-1.27	-0.29	-0.18	-2.81	-2.37	-4.22	0.6175	0.99	-0.69	0.243827	0.0607966	0.405765	1	0.999631	0.765969
Ank3_S4R1S2_S1411s_1	0.73	0.23	-0.51	0.71	1.65	-0.17	0.5	0.85	0.62	-0.05	0.66	0.47	-0.46	0.26	0.09	0.59	0.4175	0.135	-0.17	0.373172	0.711782	0.666463	1	0.999631	0.88264
Ank3_S4R1S2_S1421s_1	-2.06	-1.44	-1.27	-0.29	-1.27	-1.89	-1.03	-0.43	-2.1	-2.06	-0.67	-0.6	-1.6	-1.94	-1	-1.1	0.11	-0.0925	-0.145	0.809836	0.859172	0.738893	1	0.999631	0.908082
Ank3_S4R2K9_S1645s_1	-0.69	-1.2	-1.11	-0.91	-1.01	-1.23	-1.01	-0.81	-1.06	-1.17	-0.9	-0.44	0.14	-0.67	-0.54	-0.26	-0.0375	0.085	0.645	0.883046	0.767086	0.0587292	1	0.999631	0.501503
Ank3_S4R2K9_S1679s_1	0.68	-0.85	-0.09	-0.61	0.09	0.11	-0.04	-0.51	0.16	0.49	-0.75	-1.17	-1.5	-0.11	-0.15	-0.39	0.13	-0.1	-0.32	0.733693	0.838422	0.495281	1	0.999631	0.810677
Ank3_S4R2K9_S1853s_1	0.99	-1.42	-2.57	0.11	1.54	0.5	0.93	0.12	0.19	-1.67	-0.32	-1.33	-1.94	-0.3	-1.4	-1.22	1.495	-0.06	-0.4925	0.0690191	0.939623	0.519578	1	0.999631	0.819456
Ank3_S4R2K9_S2113s_1	1.04	1.11	0.18	0.79	1.76	1.67	1.04	1.49	1.27	0.84	0.85	1.22	0.52	2.08	0.39	1.54	0.71	0.265	0.3525	0.0458167	0.400834	0.445952	1	0.999631	0.784402
Ank3_S4R2K9_S2215s_1	1.77	-1.02	-0.54	-0.04	-1.85	-0.7	2.43	-2.25	-2.11	0.82	-1.3	-1.82	-2.22	-2.85	-1.99	-2.57	-0.635	-1.145	-2.45	0.548775	0.170469	0.00184525	1	0.999631	0.351308
Ank3_S4R2K9_S2246s_1	-0.17	-0.9	-0.06	-0.32	-0.92	-0.63	-0.21	-0.84	-0.74	0.06	-0.49	0.01	0.5	-0.6	-0.32	0.05	-0.2875	0.0725	0.27	0.356747	0.823826	0.454562	1	0.999631	0.789731
Ank3_S4R2K9_S2330s_1	2.91	0.29	0	1.33	0.17	1.01	1.82	0.61	0.14	1.44	-0.32	-0.59	-1.4	-0.55	0.1	-0.84	-0.23	-0.965	-1.805	0.729587	0.19458	0.0187655	1	0.999631	0.391024
Ankhd1_F7DE17_S168s_1	0.66	1.17	1.78	0.92	1.01	1.38	1.1	1.97	1.16	0.44	2.62	2.29	0.62	1.77	3.04	2.11	0.2325	0.495	0.7525	0.513084	0.35589	0.172277	1	0.999631	0.642116
Ankhd1_F7DE17_T29t_1	1.23	0.75	0.2	0.47	0.58	1.73	1.15	0.46	0.95	1.12	1.43	1.15	-0.2	1.38	1.01	0.21	0.3175	0.5	-0.0625	0.411282	0.13049	0.884686	1	0.999631	0.963505
Ankib1_Q6ZPS6_S738s_1	-0.14	-0.25	-0.92	-1.13	-0.77	-0.59	-1.18	-0.99	-0.54	0.08	-0.63	-0.84	0.38	-0.31	-0.94	-0.39	-0.2725	0.1275	0.295	0.407063	0.71816	0.459479	1	0.999631	0.79152
Ankrd11_E9Q4F7_S1676s_1	0.64	1.27	0.93	0.52	0.48	0.97	0.21	0.3	0.61	1.33	0.67	0.63	0.65	1.08	0.67	1.56	-0.35	-0.03	0.15	0.261321	0.922688	0.659035	1	0.999631	0.880034
Ankrd12_G5E893_T1349t_1	1.37	-0.02	1.63	2.19	0.31	-0.18	0.94	1.94	0.27	2.48	1.05	3.11	0.04	0.76	2.22	2.2	-0.54	0.435	0.0125	0.373471	0.545241	0.984525	1	0.999631	0.995133
Ankrd13c_Q3UX43_S411s_1	-0.61	0.14	-0.2	-0.58	-0.41	0.15	-0.88	-0.48	-0.04	-0.54	-0.46	-0.06	0.08	0.13	-0.7	-0.07	-0.0925	0.0375	0.1725	0.774672	0.899938	0.606363	1	0.999631	0.858185
Ankrd13d_Q6PD24_T556t_1	-0.89	-0.85	0.23	-0.53	-0.92	-0.69	-0.73	-0.77	-0.76	-0.33	-0.09	-0.06	-0.72	-0.57	0.09	0.11	-0.2675	0.2	0.2375	0.405522	0.56756	0.532682	1	0.999631	0.8277
Ankrd17_E9QKG6_S1804s_1	-0.03	-0.04	0.69	0.1	0.35	0.27	0.1	0.74	0.51	0.54	-0.4	0.66	1.06	1.04	-0.04	0.7	0.185	0.1475	0.51	0.528913	0.668671	0.177795	1	0.999631	0.642116
Ankrd17_E9QKG6_S2150s_1	1.05	0.37	-1.97	-1.29	0.68	0.1	0.1	-1.26	0.33	-0.25	-1.35	-0.36	-0.69	-0.33	-2.51	-0.22	0.365	0.0525	-0.4775	0.613983	0.940098	0.540526	1	0.999631	0.831391
Ankrd27_Q3UMR0_S634s_1	-0.39	-1.75	-0.38	-0.64	-1.31	-1.52	-0.62	-0.86	-1.14	-0.76	-1.08	-0.29	-0.86	-0.33	-0.47	-0.52	-0.2875	-0.0275	0.245	0.470279	0.944365	0.524059	1	0.999631	0.822727
Ankrd34a_B2RW11_S149s_1	-0.91	-1.41	-0.25	-0.5	-1.18	-1.65	-0.71	-0.57	-1.22	-1.93	-0.08	-0.29	-0.35	-0.74	-0.07	0.09	-0.26	-0.1125	0.5	0.488873	0.814315	0.187198	1	0.999631	0.646474
Ankrd34a_B2RW11_S183s_1	-0.92	-0.77	-0.36	-0.48	-0.53	-0.84	-1.15	-0.13	-0.94	-0.86	-0.44	0.01	0.41	-0.45	0.14	-0.14	-0.03	0.075	0.6225	0.92264	0.81269	0.0710885	1	0.999631	0.531307
Ankrd34a_B2RW11_S225s_1	-0.68	-0.65	-0.9	0.57	0.36	0.02	0.16	0.77	-0.02	-0.61	-0.12	-0.22	-1.77	-0.8	-0.02	-0.02	0.7425	0.1725	-0.2375	0.0768567	0.651172	0.641406	1	0.999631	0.871335
Ankrd34a_B2RW11_S246s_1	0.02	0.47	0.3	-0.01	0.2	0.34	0.01	-0.06	0.6	-0.01	0.17	0.01	0.48	1	-0.05	0.24	-0.0725	-0.0025	0.2225	0.777993	0.992868	0.501371	1	0.999631	0.814092
Ankrd34a_B2RW11_S391s_1	-0.07	0.04	-0.74	0.25	1.05	0.35	-0.1	-0.03	0.76	-0.93	0.07	-0.49	-0.97	0.55	-0.23	0.13	0.4475	-0.0175	1.57009e-16	0.234994	0.967102	1	1	0.999631	1
Ankrd34a_B2RW11_S408s_1	-0.58	-1.73	-0.4	-0.15	-1.24	-1.05	0.26	0.13	-1.59	-0.92	0.73	0.04	-2.95	-1.04	-0.29	0.82	0.24	0.28	-0.15	0.628145	0.625687	0.843564	1	0.999631	0.94821
Ankrd34a_B2RW11_S460s_1	-0.02	1.09	-0.21	0.53	0.8	0.77	0.35	0.49	0.91	-0.07	0.76	0.68	0.51	1.27	0.91	1	0.255	0.2225	0.575	0.466247	0.566829	0.146525	1	0.999631	0.618378
Ankrd34a_B2RW11_S472s_1	-0.14	3.68	2.88	-0.56	5.31	1.98	4.69	1.4	7.23	-0.44	4.31	5.74	6.38	0.94	2.32	-0.1	1.88	2.745	0.92	0.149564	0.125496	0.540899	1	0.999631	0.831715
Ankrd34a_B2RW11_T315t_1	-0.35	0.82	1.45	0.37	0.34	0.42	0.5	1.04	0.51	0.24	1.22	1.05	0.65	0.77	1.3	1.46	0.0025	0.1825	0.4725	0.995137	0.678511	0.290965	1	0.999631	0.706164
Ankrd34b_Q3UUF8_S293s_1	-0.29	3.01	0.32	-0.97	4.13	0.98	2.14	-0.13	6.32	0.23	2	2.57	4.38	1.4	0.88	-0.25	1.2625	2.2625	1.085	0.259556	0.111971	0.343949	1	0.999631	0.733852
Ankrd34c_Q8BLB8_S231s_1	-0.17	-0.05	0.62	-0.47	0.43	-0.55	0.27	-0.73	0.19	-0.32	0.53	0.09	-0.03	-0.77	0.53	0.56	-0.1275	0.14	0.09	0.739461	0.67886	0.825338	1	0.999631	0.940329
Ankrd34c_Q8BLB8_T347t_1	1	1.68	-0.53	0.52	0.91	1.5	1.33	0.87	1.22	0.55	1.01	0	-0.4	1.65	-0.79	-0.21	0.485	0.0275	-0.605	0.313757	0.95679	0.357527	1	0.999631	0.740986
Ankrd50_F7BE84_S1101s_1	-1.48	-0.5	-0.41	0.21	-1.08	-1.22	-1.17	1.45	-0.77	-0.71	1.1	-0.13	-0.61	-0.61	-0.27	-0.55	0.04	0.4175	0.035	0.951592	0.432079	0.928314	1	0.999631	0.976721
Ankrd50_F7BE84_S1279s_1	1.67	-0.7	0.05	-0.44	-1.44	0.17	2.13	-2.12	-2.46	1.35	-1.47	-1.61	-1.13	-1.96	-1.48	-1.86	-0.46	-1.1925	-1.7525	0.625452	0.186788	0.00758608	1	0.999631	0.358173
Ankrd63_A2ARS0_S193s_1	-1.2	-0.15	-0.15	-2	-3.33	-2.6	-3.39	-1.75	-1.13	0.21	-2.02	-0.56	1.09	-0.48	0.07	-0.33	-1.8925	3.14018e-16	0.9625	0.00586574	1	0.0968927	1	1	0.55886
Ankrd63_A2ARS0_S193s_2	0.57	-0.65	-1.45	0.78	0.52	-1.23	-0.23	0.82	-0.2	-0.4	-0.78	-0.52	-2.17	-0.48	-0.02	-0.45	0.1575	-0.2875	-0.5925	0.801326	0.575581	0.363898	1	0.999631	0.743941
Ankrd63_A2ARS0_S203s_1	0.85	-1.2	-1.87	-0.18	-0.15	-1.23	-0.32	0	-0.87	-0.52	-1.44	-0.96	-2.35	-1.37	-0.91	-1.64	0.175	-0.3475	-0.9675	0.768591	0.548652	0.134463	1	0.999631	0.605974
Ankrd63_A2ARS0_S203s_2	0.56	-0.71	-1.47	0.81	0.5	-1.23	-0.15	0.85	-0.25	-0.4	-0.72	-0.54	-2.13	-0.34	-0.01	-0.59	0.195	-0.275	-0.565	0.758315	0.595966	0.388433	1	0.999631	0.757772
Ankrd63_A2ARS0_S268s_1	-0.56	0.12	-0.43	0.66	0.15	-0.52	-0.34	0.08	-0.13	-0.96	-0.09	-0.46	-1.25	-0.3	-0.36	-1.05	-0.105	-0.3575	-0.6875	0.765581	0.347548	0.106416	1	0.999631	0.568797
Ankrd63_A2ARS0_S293s_1	1.77	-2.66	-4.02	0.01	1.01	-2.95	0.24	0.23	-0.59	-3.44	-1.39	-2.02	-3	-1.7	-2.07	-3.68	0.8575	-0.635	-1.3875	0.525708	0.607418	0.251889	1	0.999631	0.687703
Ankrd63_A2ARS0_S341s_1	1.24	0.47	-1.31	2.27	2.89	-0.29	0.63	2.11	1.5	-0.08	0.42	1.23	0.13	0.66	1.27	0.72	0.6675	0.1	0.0275	0.465238	0.892678	0.968667	1	0.999631	0.988771
Ankrd63_A2ARS0_T342t_1	1.24	0.47	-1.31	2.27	2.89	-0.29	0.63	2.11	1.5	-0.08	0.42	1.23	0.13	0.66	1.27	0.72	0.6675	0.1	0.0275	0.465238	0.892678	0.968667	1	0.999631	0.988771
Anks1_Q3UHP6_S663s_1	0.25	0.92	0.37	-0.84	0.77	1.13	-0.58	0.41	1.05	0.84	-0.92	-1.19	1.57	1.04	-0.15	-0.72	0.2575	-0.23	0.26	0.6022	0.712895	0.660036	1	0.999631	0.880315
Anks1_Q3UHP6_S903s_1	-0.81	-1.24	0.6	-1.47	0.92	-1.32	1.85	0.1	0.92	-0.27	2.03	2.77	1.66	-2.49	0.5	0.54	1.1175	2.0925	0.7825	0.144721	0.0150463	0.376985	1	0.999631	0.749236
Anks1b_S4R286_S1222s_1	1.61	-0.72	0.19	0.88	1.78	0.05	1.13	0.6	0.01	-0.91	0.91	-1.03	-1.96	-0.29	-1.26	0.13	0.4	-0.745	-1.335	0.484931	0.240672	0.0533487	1	0.999631	0.490856
Anks1b_S4R286_S364s_1	-0.17	0.34	1.73	1.69	0.09	0.47	1.07	0.93	0.52	1.14	2.06	2.57	0.31	0.92	2.72	2.76	-0.2575	0.675	0.78	0.607189	0.280184	0.28048	1	0.999631	0.701922
Anks1b_S4R286_S510s_1	-1.23	-0.04	-0.2	-0.17	0.03	0.03	-0.88	-0.48	-0.11	-0.63	-0.2	0.17	0.35	-0.18	-0.06	-0.25	0.085	0.2175	0.375	0.818884	0.545922	0.308409	1	0.999631	0.718521
Anks1b_S4R286_S589s_1	0.32	5.62	2.3	0.69	4.8	4.38	1.84	1.5	5.05	1.83	3.05	4.07	5.55	3.17	2.32	1.35	0.8975	1.2675	0.865	0.481681	0.302075	0.501166	1	0.999631	0.814092
Anks1b_S4R286_T968t_1	-1.99	-2.53	-0.96	-0.98	-2.85	-2.27	-1.69	-1.33	-2.72	-1.66	-1.57	-1.14	-1.6	-2.21	-1.65	-0.43	-0.42	-0.1575	0.1425	0.395086	0.748279	0.781105	1	0.999631	0.921543
Anln_Q8K298_S637s_1	-0.3	0.39	1.87	0.56	0.46	0.72	1.08	0.57	1.1	0.21	1.35	2.07	0.29	0.44	1.6	0.56	0.0775	0.5525	0.0925	0.864809	0.328505	0.857285	1	0.999631	0.952021
Anln_Q8K298_S656s_1	0.5	1.05	1.71	0.49	0.21	0.77	-0.25	-0.32	0.83	1.9	0.46	0.64	2.04	0.47	0.91	0.1	-0.835	0.02	-0.0575	0.0554533	0.963034	0.906809	1	0.999631	0.969801
Ano8_Q6PB70_S637s_1	-0.23	0.11	-0.15	-0.55	-0.03	-0.23	-0.73	-0.41	-0.33	-0.02	-0.2	-0.33	0.57	-0.25	-0.19	0.1	-0.145	-0.015	0.2625	0.608703	0.955309	0.416471	1	0.999631	0.770712
Antxr1_Q9CZ52_S561s_1	-0.34	-0.52	-0.59	-0.75	-0.32	-0.74	-0.36	-0.36	-0.86	-0.43	-1.04	-0.95	0.16	-0.64	-0.72	-0.78	0.105	-0.27	0.055	0.676383	0.330081	0.863417	1	0.999631	0.955107
Anxa7_Q07076_S311s_1	0.49	-0.41	0.68	-0.08	-0.49	-0.27	-0.01	-0.28	-0.11	0.74	0.4	0.4	-0.23	-0.61	0.07	-0.4	-0.4325	0.1875	-0.4625	0.196251	0.592306	0.204353	1	0.999631	0.659876
Ap1g1_Q8CBB7_S235s_1	-0.5	-0.52	-0.3	-0.45	-0.63	-0.62	-0.64	-0.6	-0.84	-0.48	-0.67	-0.02	-0.21	-0.24	-0.35	-0.08	-0.18	-0.06	0.2225	0.440538	0.830656	0.403394	1	0.999631	0.764348
Ap2a1_P17426_S517s_1	-0.74	-2.04	-0.8	-2.11	-1.56	-1.86	-0.94	-0.67	-2.21	-2.11	-1.55	-0.21	-1.27	-2.54	-0.67	-1.11	0.165	-0.0975	0.025	0.714855	0.859582	0.961664	1	0.999631	0.986594
Ap2a1_P17426_S518s_1	-0.74	-2.04	-0.8	-2.11	-1.56	-1.86	-0.94	-0.67	-2.21	-2.11	-1.55	-0.21	-1.27	-2.54	-0.67	-1.11	0.165	-0.0975	0.025	0.714855	0.859582	0.961664	1	0.999631	0.986594
Ap2a1_P17426_S611s_1	0.8	0.76	0.03	0.02	0.58	0.58	0.19	0.89	0.03	0.56	0.86	-0.18	-0.84	0.87	0.19	0.91	0.1575	-0.085	-0.12	0.617715	0.812362	0.793791	1	0.999631	0.928267
Ap2a1_P17426_S626s_1	0.14	0.3	0.64	-0.13	-0.91	0.06	-0.14	-0.21	-0.78	-0.17	-0.11	-0.3	-0.19	0.15	0	0.35	-0.5375	-0.5775	-0.16	0.11386	0.0776447	0.598166	1	0.999631	0.855276
Ap2a1_P17426_S631s_1	0.96	-0.15	0.3	0.5	0.64	0.91	0.51	1.07	0.04	0	0.55	0.09	0.26	1.09	0.43	0.38	0.38	-0.2325	0.1375	0.245205	0.476013	0.697153	1	0.999631	0.895731
Ap2a1_P17426_S655s_1	-0.72	-0.09	2.27	0.97	0	-0.41	0.04	0.22	-0.68	-1.35	0.66	1.95	0.67	0.48	1.53	0.51	-0.645	-0.4625	0.19	0.299608	0.592282	0.763879	1	0.999631	0.915728
Ap2m1_P84091_S45s_1	-0.33	-0.24	-0.14	-0.68	-0.97	-0.77	-0.94	-1.1	-1.14	-0.64	-0.87	-1.17	-0.66	-0.85	-1.46	-1.21	-0.5975	-0.6075	-0.6975	0.0373739	0.0488114	0.0445126	1	0.999631	0.475443
Ap2m1_P84091_T156t_1	-0.17	0.24	-0.33	0.32	0.23	-0.01	0.08	1.26	0.18	-0.32	0.63	0.36	0.7	0.55	0.42	0.33	0.375	0.1975	0.485	0.309299	0.537038	0.121387	1	0.999631	0.589748
Ap3b2_Q9JME5_S272s_1	-0.48	0.65	0.71	0.12	0.37	0.35	-0.09	0.88	0.34	0.21	0.37	0.75	1.31	0.56	0.78	0.51	0.1275	0.1675	0.54	0.726054	0.627987	0.169598	1	0.999631	0.639508
Ap3b2_Q9JME5_S8s_1	2.1	1.14	0.19	1.85	2.02	0.94	1.63	1.44	1.84	1.81	0.78	0.77	0.49	1.13	1.57	0.71	0.1875	-0.02	-0.345	0.686512	0.967944	0.47567	1	0.999631	0.799882
Ap3d1_O54774_S760s_1	0.31	2.72	1.75	-0.78	3.34	1.49	1.41	0.78	3.95	0.19	2.96	3.75	5.03	0.79	1.67	0.56	0.755	1.7125	1.0125	0.371857	0.112783	0.366783	1	0.999631	0.745796
Ap3d1_O54774_S825s_1	0.66	-0.53	-0.85	-0.62	-0.46	-0.58	-0.02	-0.83	0.08	-0.09	-1.07	-1.28	0.46	-1.16	-0.92	-1.51	-0.1375	-0.255	-0.4475	0.723843	0.587355	0.39758	1	0.999631	0.761181
Ap4e1_Q80V94_S675s_1	-0.66	-0.51	-0.42	-0.38	-0.55	-0.76	-0.42	-0.54	-0.74	0.08	-0.15	0.21	0.22	-0.25	-0.39	0.61	-0.075	0.3425	0.54	0.754094	0.266647	0.115587	1	0.999631	0.580776
Apba1_B2RUJ5_S246s_1	1.15	1.13	1.71	1.13	0.07	1.56	2.6	0.15	-0.03	1.17	0.87	1.03	0.49	0.12	1.74	0.53	-0.185	-0.52	-0.56	0.745562	0.157282	0.185706	1	0.999631	0.646224
Apba1_B2RUJ5_S289s_1	-1.06	-1.13	-0.2	-1.41	-1.46	-1.46	-0.41	-2	-1.12	-0.52	-0.79	-0.4	0.25	-1.77	-0.74	-1.46	-0.3825	0.2425	0.02	0.372195	0.490467	0.967922	1	0.999631	0.988771
Apba1_B2RUJ5_S317s_1	-0.65	-1.48	-1.16	-1.69	-2.04	-1.86	-1.08	-1.67	-1.89	-0.74	-1.62	-1.61	-0.39	-1.3	-1.85	-1.42	-0.4175	-0.22	0.005	0.24007	0.552331	0.990107	1	0.999631	0.995892
Apba1_B2RUJ5_S317s_2	-0.68	-0.61	0.17	0.3	-0.09	-0.78	0.04	0.42	-0.25	-0.63	0.94	1.61	0.54	0.04	1.22	0.96	0.1025	0.6225	0.895	0.784472	0.265045	0.042586	1	0.999631	0.475443
Apba1_B2RUJ5_S372s_1	-0.19	-0.46	-0.32	1.45	0.51	0.56	0.53	1.55	0.83	0.43	1.71	1.47	-2.11	1.42	1.38	1.21	0.6675	0.99	0.355	0.190747	0.0745883	0.6747	1	0.999631	0.885515
Apba1_B2RUJ5_S391s_1	0.74	-0.47	-0.02	-0.29	-0.34	-0.14	-0.04	-0.82	-0.14	1.01	-0.49	-0.57	-0.46	-0.84	-0.74	-0.9	-0.325	-0.0375	-0.725	0.361807	0.932782	0.0578938	1	0.999631	0.49853
Apba1_B2RUJ5_S573s_1	0.61	0.02	-0.15	0	-0.05	0.32	0.31	-0.36	0.48	0.95	-0.35	-0.66	-0.34	-0.42	-0.5	-0.88	-0.065	-0.015	-0.655	0.827582	0.971009	0.053747	1	0.999631	0.4909
Apba1_B2RUJ5_T309t_1	0	-0.28	-0.57	-0.39	-0.62	-0.57	-0.4	-0.72	-0.2	0.3	-0.6	-0.02	0.03	-0.03	-1.18	-0.03	-0.2675	0.18	0.0075	0.304556	0.551408	0.983528	1	0.999631	0.995133
Apba1_B2RUJ5_T309t_2	-0.68	-0.61	0.17	0.3	-0.09	-0.78	0.04	0.42	-0.25	-0.63	0.94	1.61	0.54	0.04	1.22	0.96	0.1025	0.6225	0.895	0.784472	0.265045	0.042586	1	0.999631	0.475443
Apba1_B2RUJ5_T333t_1	0.22	-0.45	-1.3	0.13	-0.21	-0.17	0.12	0.14	-0.33	-0.05	0.03	0	-0.97	-0.42	-0.37	-0.25	0.32	0.2625	-0.1525	0.404878	0.496279	0.707821	1	0.999631	0.898881
Apba1_B2RUJ5_T375t_1	-0.19	2.38	1.12	0.3	0.34	1.77	0.04	0.67	1.7	1.76	0.75	1.31	1.44	2.28	0.8	1.71	-0.1975	0.4775	0.655	0.746603	0.403875	0.2796	1	0.999631	0.701922
Apba2_P98084_S479s_1	0	0.57	-0.26	-0.62	0.11	0.46	-0.46	0.86	-0.08	0.55	0.22	-0.2	-0.26	0.81	-0.27	-0.21	0.32	0.2	0.095	0.41579	0.564623	0.809032	1	0.999631	0.93635
Apba2_P98084_S481s_1	0.1	-0.59	-1.97	-0.56	0.09	-0.25	-0.73	-0.5	-0.24	-0.49	-0.7	-0.91	-1.57	-0.24	-0.68	-0.67	0.4075	0.17	-0.035	0.378292	0.706244	0.943746	1	0.999631	0.981629
Apba2_P98084_T307t_1	2.59	-0.41	-0.06	1.74	0.03	0.79	2.69	0.48	-0.54	0.15	0.4	-0.56	-2.86	-1.02	0.11	-0.61	0.0325	-1.1025	-2.06	0.967889	0.128418	0.0305507	1	0.999631	0.438336
Apbb1ip_Q8R5A3_S507s_1	0.47	0.89	0.1	-0.65	-0.04	0.54	0.73	0.15	0.56	1.3	-0.18	1.84	1.07	0.12	0.48	-0.75	0.1425	0.6775	0.0275	0.710851	0.209394	0.954792	1	0.999631	0.984441
Apbb2_F6V8Y6_S413s_1	-0.59	0.95	0.84	-0.73	0.04	0.68	-0.45	-0.1	0.45	0.12	-0.09	0.69	2.66	0.42	0.84	-0.6	-0.075	0.175	0.7125	0.876177	0.708805	0.335202	1	0.999631	0.730219
Apbb3_Q8R1C9_S111s_1	0.79	0.27	0.61	0.81	-0.04	0.66	1.32	0.35	0.61	1.18	1.17	1.02	0.17	0.12	0.46	0.32	-0.0475	0.375	-0.3525	0.890574	0.201306	0.228614	1	0.999631	0.679038
Apc_B2RUG9_S1030s_1	0.57	0.6	0.42	0.69	0.76	0.62	0.81	0.73	1.5	0.33	1.18	0.97	-0.16	0.01	0.91	0.59	0.16	0.425	-0.2325	0.497522	0.19952	0.486333	1	0.999631	0.804724
Apc_B2RUG9_S1040s_1	0.18	-3.5	2.33	0.76	-2.83	-2.38	2.91	0.14	-2.01	-0.16	0.21	0.13	-2.02	-3.64	0.12	-0.31	-0.4825	-0.4	-1.405	0.753413	0.728551	0.283861	1	0.999631	0.704942
Apc_B2RUG9_S1370s_1	-1.09	-1.48	-1.22	-1.74	-1.41	-1.8	-1.36	-1.7	-1.73	-1.42	-1.16	0.1	-0.91	-1.52	-1.3	-1.33	-0.185	0.33	0.1175	0.50021	0.446943	0.695761	1	0.999631	0.895683
Apc_B2RUG9_S1435s_1	-0.57	-0.3	0.15	-0.1	-0.34	-0.84	-0.86	-0.06	-0.76	-0.24	-0.71	0.38	-0.02	-0.03	0.6	-0.08	-0.32	-0.1275	0.3225	0.310381	0.713957	0.315947	1	0.999631	0.720734
Apc_B2RUG9_S1772s_1	0.89	-0.73	-1.29	-1.24	-0.82	-0.77	-0.75	-0.68	-0.33	-0.25	-0.52	0.76	0.59	-0.33	-0.21	-0.95	-0.1625	0.5075	0.3675	0.737251	0.362012	0.513895	1	0.999631	0.81893
Apc_B2RUG9_S2260s_1	0.54	-0.23	-0.28	0.46	0.05	0.12	0.14	0.23	0.29	0.6	0.27	0.01	-0.76	-0.22	0.03	0.15	0.0125	0.17	-0.3225	0.965816	0.591142	0.371101	1	0.999631	0.746338
Apc_B2RUG9_S2283s_1	1.16	0.49	1.11	0.5	0.44	1.22	0.37	0.83	0.49	1.23	0.65	0.92	-0.06	0.65	1.18	1.19	-0.1	0.0075	-0.075	0.754199	0.980807	0.84471	1	0.999631	0.94856
Apc_B2RUG9_S2290s_1	2.23	0.51	2.53	2.45	0.07	0.88	2.47	1.84	0.08	0.93	1.94	1.63	-0.27	0.53	1.23	1.25	-0.615	-0.785	-1.245	0.346754	0.196427	0.0456956	1	0.999631	0.477252
Apc_B2RUG9_S2449s_1	0.5	0.43	-1.49	-0.59	0.49	0.46	-0.4	-0.59	0.82	0.85	0	-0.59	-0.51	1.01	-0.65	-0.27	0.2775	0.5575	0.1825	0.59103	0.319474	0.74538	1	0.999631	0.910585
Apc_B2RUG9_S2674s_1	-0.04	-0.25	-0.02	0.09	0.13	-0.55	-0.48	0.52	-0.15	-0.26	0.02	-0.35	-0.15	-0.22	1.32	-0.08	-0.04	-0.13	0.2725	0.899259	0.607044	0.500601	1	0.999631	0.813915
Apc_B2RUG9_S2710s_1	-0.27	0.03	0.06	-0.27	0.08	-0.7	-0.3	0.28	0.55	0	0.16	0.35	1.28	-0.82	-0.93	0.13	-0.0475	0.3775	0.0275	0.873711	0.177972	0.956055	1	0.999631	0.984741
Apc_B2RUG9_S2771s_1	-1.16	2.52	2.82	0.25	4.89	1.51	3.76	0.46	6.93	-1.15	3.25	4.92	6.35	-0.28	0.22	0.32	1.5475	2.38	0.545	0.212046	0.175455	0.724019	1	0.999631	0.905674
Apc_B2RUG9_S2829s_1	1.81	0.09	0.88	0.48	-1.51	1.09	1.76	-0.87	-0.17	0.81	-1.52	0.64	0.03	-0.83	-0.03	-0.34	-0.6975	-0.875	-1.1075	0.36704	0.161925	0.0251899	1	0.999631	0.421067
Apc_B2RUG9_S742s_1	-1.32	-0.71	-0.65	-1.01	-1.16	-0.38	-0.37	-1.2	-0.66	-0.39	-0.51	-0.17	-0.75	-0.16	-1.74	-0.25	0.145	0.49	0.1975	0.656228	0.106413	0.633246	1	0.999631	0.868569
Apc_B2RUG9_S838s_1	2.69	-0.91	-0.63	1.27	0.31	-0.31	2.55	-0.56	-0.4	0.51	0.06	-1.1	-2.46	-1.47	-1.2	-1.52	-0.1075	-0.8375	-2.2675	0.910067	0.310578	0.0146191	1	0.999631	0.386443
Apc_B2RUG9_S983s_1	0.36	-0.78	-0.27	1.6	0.42	0.3	1.14	1.15	0.48	0.34	0.16	1.08	-0.89	0.2	0.3	0.18	0.525	0.2875	-0.28	0.327103	0.581692	0.61008	1	0.999631	0.859048
Apc_B2RUG9_T1437t_1	0.89	1.21	1.04	-1.06	1.14	1.56	-0.03	0.07	1.46	1.17	1.43	0.55	1.33	1.94	0.16	0.27	0.165	0.6325	0.405	0.782715	0.253076	0.516962	1	0.999631	0.819449
Apc2_D3YTR0_S1230s_1	-0.56	0.14	-1.06	-0.79	-0.35	-0.47	-1	0.05	-0.53	-1.02	0.16	-0.31	0.07	-0.07	0.08	-0.67	0.125	0.1425	0.42	0.72901	0.707258	0.261507	1	0.999631	0.69271
Apc2_D3YTR0_S1834s_1	1.71	-0.8	0.14	-0.21	-0.98	-0.21	0.56	-0.79	-1.16	0.78	-0.67	-1.18	-0.88	-1.59	-0.95	-1.4	-0.565	-0.7675	-1.415	0.342266	0.246974	0.0220098	1	0.999631	0.405544
Apc2_D3YTR0_S1880s_1	-0.17	-3.4	-0.58	-0.74	-1.02	-0.6	-2.09	-2.04	-2.55	-0.19	-1.13	-1.85	-1.25	-0.06	-1.31	-0.64	-0.215	-0.2075	0.4075	0.767662	0.791639	0.564912	1	0.999631	0.84139
Apc2_D3YTR0_S1890s_1	-0.77	-0.48	-0.89	-0.34	0.14	-0.41	-0.73	-0.45	-0.18	-0.07	-0.38	-0.59	0.23	0.27	-0.24	0.32	0.2575	0.315	0.765	0.387533	0.268227	0.0248257	1	0.999631	0.418003
Apc2_D3YTR0_S2010s_1	1.13	0.96	1.15	1.46	1.37	0.98	1.16	1.28	1.8	0.29	0.71	0.7	0.92	1.3	-0.02	1.02	0.0225	-0.3	-0.37	0.928771	0.423598	0.313346	1	0.999631	0.719861
Apc2_D3YTR0_S2128s_1	1.24	-1.05	-0.49	-0.48	-0.91	-0.85	1.05	-1.05	-1.26	0.59	-1.44	-0.99	-0.49	-1.35	-1.82	-0.58	-0.245	-0.58	-0.865	0.698706	0.358213	0.138756	1	0.999631	0.611577
Apc2_D3YTR0_S2172s_1	1	1.34	-0.41	-0.94	1.09	0.9	-0.89	-0.4	1.17	2.21	-0.35	0.13	0.3	1.39	-0.02	0.21	-0.0725	0.5425	0.2225	0.911568	0.447802	0.702126	1	0.999631	0.896857
Apc2_D3YTR0_S2205s_1	-0.67	-0.63	-0.32	-1.6	-0.3	-0.85	-0.54	-0.5	-0.1	-1.15	-0.15	-0.36	0.5	-1.15	-0.64	-1.09	0.2575	0.365	0.21	0.450814	0.35689	0.652658	1	0.999631	0.877704
Apc2_D3YTR0_T128t_1	-0.25	-0.9	-0.35	-0.03	-1.22	-1.45	-0.26	0.09	-1.15	-0.75	-0.84	-0.5	-0.97	-0.85	-0.51	-0.54	-0.3275	-0.4275	-0.335	0.435616	0.179705	0.295254	1	0.999631	0.708769
Api5_O35841_S464s_1	2.44	1.5	3.45	1.46	1.25	1.43	2.13	0.65	1.29	2.02	1.29	0.96	0.09	0.78	1.39	0.04	-0.8475	-0.8225	-1.6375	0.128025	0.121811	0.0112454	1	0.999631	0.385092
Aplf_Q9D842_S23s_1	0.51	1.44	1.24	1.27	0.97	1.25	0.79	1.37	1.38	1.21	0.98	1.81	1.51	1.53	1.86	1.38	-0.02	0.23	0.455	0.947578	0.486237	0.172807	1	0.999631	0.642116
Aplp2_Q60709_T724t_1	-0.26	0.12	-0.58	0.16	-0.48	-0.69	-0.73	0.19	-0.4	-0.7	-0.93	-0.5	-0.27	-0.2	-0.45	0.15	-0.2875	-0.4925	-0.0525	0.382099	0.117634	0.865332	1	0.999631	0.955768
Apoe_P08226_T140t_1	-0.5	1.63	1.07	0.62	1.26	1.02	0.25	0.39	0.83	0.26	1.48	1.3	2.09	0.39	2.56	0.9	0.025	0.2625	0.78	0.958841	0.602424	0.223361	1	0.999631	0.67471
App_Q3TWF3_S441s_1	-0.17	1.16	0.3	-0.01	0.2	0.25	-0.22	0.74	0.5	0.71	0.3	0.85	1.23	1.47	1.75	1.1	-0.0775	0.27	1.0675	0.835371	0.454818	0.0154127	1	0.999631	0.388832
App_Q3TWF3_T725t_1	0.11	-0.22	-0.71	-1.48	-0.49	-0.03	-0.86	-0.63	-0.72	0.36	-0.96	-0.64	0.09	0.47	-1.12	-0.93	0.0725	0.085	0.2025	0.854078	0.848579	0.684984	1	0.999631	0.890166
Appl1_Q8K3H0_S401s_1	0.2	0.08	-0.77	0.52	0.56	0.33	0.8	0.51	0.46	-1.01	0.68	0.22	-2.06	0.61	0.35	0.3	0.5425	0.08	-0.2075	0.126609	0.860795	0.737481	1	0.999631	0.907787
Aqp4_P55088_S254s_1	-0.98	-1.09	-0.29	-0.89	-1.53	-0.45	-0.69	-1.33	-1.36	-0.06	-0.39	-1.66	-0.01	-0.49	-0.86	-0.43	-0.1875	-0.055	0.365	0.589439	0.896666	0.279204	1	0.999631	0.70145
Aqp4_P55088_S263s_1	0.22	1.24	1.49	0.22	0.25	1.59	0.15	-0.22	0.75	1.25	0.03	0.6	1.09	1.36	0.65	1.6	-0.35	-0.135	0.3825	0.479717	0.749058	0.361936	1	0.999631	0.742006
Araf_P04627_S255s_1	0.92	0.57	0.72	0.18	0.3	0.24	-0.07	0.33	0.35	0.92	1.09	0.41	-0.45	0.15	0.42	0.81	-0.3975	0.095	-0.365	0.166302	0.759391	0.321609	1	0.999631	0.724092
Araf_P04627_S580s_1	0.44	-0.13	0.44	-0.33	-0.14	-0.15	-0.03	-0.25	-0.14	0.63	-0.84	0.24	0.2	0.32	-0.52	0.05	-0.2475	-0.1325	-0.0925	0.389904	0.733567	0.784695	1	0.999631	0.922904
Arcn1_Q5XJY5_S493s_1	0.18	0.25	0.04	-0.37	-0.24	0.39	-0.25	-0.13	0.44	0.64	0.33	0.1	0.35	0.83	0.63	0.41	-0.0825	0.3525	0.53	0.771334	0.224356	0.0943594	1	0.999631	0.558128
Arel1_E9PZX5_S337s_1	-1.52	-0.86	-0.12	-0.19	-0.89	-0.94	-0.66	-0.51	-0.84	-0.6	-0.9	-0.6	0.06	-0.2	0.58	0.27	-0.0775	-0.0625	0.85	0.831687	0.864696	0.0530003	1	0.999631	0.489777
Arf6_P62331_S38s_1	-0.8	-0.13	0.03	-0.35	-0.64	0.75	-0.57	0.85	-0.51	-0.62	0.52	-0.25	-1.84	1.29	-1.71	-0.65	0.41	0.0975	-0.415	0.356924	0.782018	0.537317	1	0.999631	0.830391
Arfgap1_V9GWV1_S150s_1	1.94	-0.74	1.05	1.23	-0.51	0.17	1.7	1.29	-0.74	0.46	-0.75	0.24	-0.27	-0.56	0.92	0.2	-0.2075	-1.0675	-0.7975	0.759866	0.098356	0.202319	1	0.999631	0.659062
Arfgap1_V9GWV1_S159s_1	0.45	-0.51	-0.5	0.3	-0.24	-1.11	1.13	-0.47	-1.27	-1.54	-0.82	-0.85	-0.93	-1.25	-0.14	-0.88	-0.1075	-1.055	-0.735	0.830614	0.0123701	0.0782581	1	0.999631	0.543873
Arfgap1_V9GWV1_S256s_1	-1.1	-0.42	-0.73	-0.89	0.2	0.01	-0.35	0.35	-0.81	-2.33	0.27	-0.22	-1.41	-1.77	-0.14	-0.79	0.8375	0.0125	-0.2425	0.0141545	0.98156	0.554459	1	0.999631	0.838079
Arfgap1_V9GWV1_S330s_1	-0.34	-1.1	-1.57	-0.27	-0.76	-0.63	-0.6	-0.7	-0.45	-0.66	-0.99	-0.71	-1.03	-1	-1.31	-0.94	0.1475	0.1175	-0.25	0.671454	0.746885	0.501736	1	0.999631	0.814092
Arfgap1_V9GWV1_S330s_2	-0.59	0.33	0.29	0.07	0.37	-0.21	0.01	0.68	0.06	-0.87	-0.75	-0.5	-0.26	0.52	-0.14	0.78	0.1875	-0.54	0.2	0.573767	0.13768	0.593245	1	0.999631	0.853305
Arfgap1_V9GWV1_S335s_2	-0.59	0.33	0.56	0.29	0.37	-0.21	0.19	0.35	0.06	-0.87	-1.13	-0.31	-0.26	0.52	-0.3	1.43	0.0275	-0.71	0.2	0.933279	0.0918652	0.671533	1	0.999631	0.884779
Arfgap1_V9GWV1_S347s_1	-1.25	-1.37	-0.69	-0.57	-0.42	-1.86	-0.05	-0.43	-0.74	-2.06	-0.42	-0.94	-0.27	-0.76	-0.87	-0.88	0.28	-0.07	0.275	0.525446	0.865824	0.405896	1	0.999631	0.765969
Arfgap1_V9GWV1_T135t_1	-1.25	-0.52	-0.85	-1.12	-0.59	-0.51	-0.94	-0.53	-0.44	-1.04	-0.8	-0.69	0.48	0.12	-0.54	-0.5	0.2925	0.1925	0.825	0.303483	0.511742	0.0382137	1	0.999631	0.459475
Arfgap3_Q9D8S3_S403s_1	2.57	-2.42	-0.88	0.56	-1.12	-0.46	1.51	-0.8	-1.39	0.23	-0.48	-1.57	-3.05	-2.24	-1.25	-2.79	-0.175	-0.76	-2.29	0.866805	0.4484	0.0376974	1	0.999631	0.458331
Arfgef1_G3X9K3_S1076s_1	1.85	0.76	-3.54	-1.01	0.39	1.5	-1.59	-1.35	1.21	1.7	-1.12	-2.59	0.19	0.69	-2.95	-4.72	0.2225	0.285	-1.2125	0.850972	0.82925	0.416614	1	0.999631	0.770838
Arfgef1_G3X9K3_S1550s_1	-2.21	-2.24	-0.02	-2	-1.77	-2.59	-0.22	-2.28	-1.45	-2.96	-1.12	-0.08	-0.65	-3.25	-0.55	-1.69	-0.0975	0.215	0.0825	0.883883	0.762919	0.909604	1	0.999631	0.970597
Arfgef1_G3X9K3_S1563s_1	-0.88	1.14	-0.06	-1.14	2.56	0.41	2.11	-0.49	2.86	-1.45	1.59	2.47	-0.42	-0.81	-0.38	-0.48	1.3825	1.6025	-0.2875	0.0980957	0.118155	0.568452	1	0.999631	0.843185
Arfgef1_G3X9K3_S1566s_1	0.18	1.41	-2.02	0.01	0.6	0.85	0.26	-1.01	0.87	-0.57	0.07	-0.9	-0.83	-0.25	-0.43	-0.5	0.28	-0.0275	-0.3975	0.700058	0.969477	0.542973	1	0.999631	0.832881
Arfgef1_G3X9K3_S234s_1	-0.63	-1.64	-0.34	-0.97	-0.91	-0.79	0.09	0.26	-0.14	-1.65	0.08	-1.04	-1.5	-1.15	0.14	-0.78	0.5575	0.2075	0.0725	0.194682	0.662009	0.871826	1	0.999631	0.959119
Arfgef1_G3X9K3_S52s_1	1.6	0.14	1.64	1	-0.32	0.68	1.28	0.47	0.35	1.32	0.73	0.98	-0.31	-0.46	0.53	0.55	-0.5675	-0.25	-1.0175	0.237542	0.548263	0.0418213	1	0.999631	0.475443
Arfgef1_G3X9K3_S661s_1	-1.22	-0.65	-0.64	-0.77	-0.37	-0.57	-1.05	-0.5	-0.54	-0.99	-0.51	0.25	-0.67	-0.31	-1.21	-0.79	0.1975	0.3725	0.075	0.488582	0.285901	0.813061	1	0.999631	0.937041
Arfgef2_A2A5R2_S621s_1	-1.16	-0.34	-1.19	-1.06	-1.26	-1.16	-1.02	-1.52	-1.3	-0.96	-1.62	-0.37	0.59	-0.88	-0.54	-0.41	-0.3025	-0.125	0.6275	0.318141	0.732586	0.139362	1	0.999631	0.611718
Arfgef2_F6YCJ0_S129s_1	-0.82	-0.3	-2.38	-3.64	-0.28	0.05	-2.26	-2.91	0.21	-1.67	-1.7	-2.68	0.26	-0.57	-1.41	-1.98	0.435	0.325	0.86	0.634701	0.702421	0.290752	1	0.999631	0.706164
Arfgef2_F6YCJ0_S138s_1	-0.47	-1.21	-0.58	-0.62	-1.19	-0.84	-1.17	-1.09	-0.71	-0.47	-1.98	-0.98	-0.25	-0.22	-0.74	-0.97	-0.3525	-0.315	0.175	0.216903	0.426047	0.594323	1	0.999631	0.85392
Arfgef2_F6YCJ0_S187s_1	2.14	0.27	1.51	1.08	-0.79	1.33	2.44	-0.31	-0.3	2.19	-0.07	-0.05	-0.06	-0.63	-0.06	-0.23	-0.5825	-0.8075	-1.495	0.439105	0.223653	0.00533551	1	0.999631	0.351308
Arfgef2_F6YCJ0_T155t_1	0.3	1.1	2.02	1.43	0.96	0.83	1.34	1	1.72	0.58	0.73	0.99	0.85	-0.36	0.85	-0.58	-0.18	-0.2075	-1.0225	0.64248	0.635916	0.0649252	1	0.999631	0.515898
Arfgef3_Q3UGY8_S1736s_1	2.03	1.29	2.53	1.77	0	1.32	2.11	1.05	0.47	1.44	0.66	0.97	0.82	0.13	0.85	0.38	-0.785	-1.02	-1.36	0.126683	0.0180861	0.00351641	1	0.999631	0.351308
Arfgef3_Q3UGY8_S1957s_1	1.37	1.2	0.08	0.66	-0.25	1.08	0.99	0.08	-0.14	0.88	-0.71	-0.27	-1.02	-0.5	0.87	-1.82	-0.3525	-0.8875	-1.445	0.422772	0.0677985	0.0306596	1	0.999631	0.438906
Arfgef3_Q3UGY8_S2054s_1	0.2	0.57	0.59	0.91	0.11	0.42	0.3	0.85	0.34	0.34	0.95	0.5	-0.47	0.63	0.64	1.1	-0.1475	-0.035	-0.0925	0.61045	0.904011	0.813796	1	0.999631	0.937041
Arfgef3_Q3UGY8_S2088s_1	-0.21	0.2	-0.37	0.2	0.07	-0.12	0.13	0.73	0.33	0.65	0.4	0.5	0.14	0.32	1.14	0.3	0.2475	0.515	0.52	0.415538	0.0814759	0.145172	1	0.999631	0.616182
Arfgef3_Q3UGY8_S471s_1	-0.26	0.73	1.12	0.11	0.82	0.38	0.42	0.86	0.81	-0.67	1.38	1.54	0.86	1.02	1.31	1.2	0.195	0.34	0.6725	0.589412	0.538876	0.0920481	1	0.999631	0.557085
Arglu1_Q3UL36_S75s_1	1.68	-1.28	0.41	0.48	-1.5	-1.15	1.38	-0.38	-2.55	0.83	-0.38	-0.45	-2	-2.06	-0.16	-0.34	-0.735	-0.96	-1.4625	0.35416	0.255805	0.0611838	1	0.999631	0.509355
Arhgap1_Q5FWK3_S223s_1	-2.06	-6.81	1.21	1.53	-3.43	-4.29	1.76	0.76	-7.52	-3.13	0.52	0.76	-4.39	-4.27	2.03	0.04	0.2325	-0.81	-0.115	0.910403	0.727128	0.956181	1	0.999631	0.984772
Arhgap1_Q5FWK3_S27s_1	0.61	0.49	-0.45	0.71	0.63	0.05	0	-0.04	0.31	0.05	0.08	0.45	-0.81	0.24	-0.15	0.36	-0.18	-0.1175	-0.43	0.602655	0.72535	0.296452	1	0.999631	0.709528
Arhgap1_Q5FWK3_S51s_1	-0.18	-0.02	-0.39	-0.66	-0.37	-0.6	-0.83	-0.11	-0.24	0.51	0.28	0.3	0.69	0.38	0.19	0.09	-0.165	0.525	0.65	0.565092	0.0986792	0.05106	1	0.999631	0.489558
Arhgap10_Q6Y5D8_S488s_1	-0.14	0.19	-0.05	-0.65	-0.43	0.13	-0.48	-0.43	-0.56	-0.06	-0.32	0.02	0.03	-0.27	-0.59	-0.19	-0.14	-0.0675	-0.0925	0.637385	0.821128	0.766644	1	0.999631	0.916961
Arhgap12_B2RUJ8_S199s_1	0.08	0.78	0.83	0.48	0.44	0.78	0.2	-0.31	1.16	0.93	-0.22	-0.19	1.76	-0.42	1.45	0.46	-0.265	-0.1225	0.27	0.428363	0.7657	0.593184	1	0.999631	0.853305
Arhgap12_B2RUJ8_S213s_1	-0.25	0.35	0.65	0.56	-0.38	-0.22	0.13	0.85	0.41	0.22	-0.47	0.34	0.44	-0.21	1.15	0.22	-0.2325	-0.2025	0.0725	0.525749	0.549334	0.849972	1	0.999631	0.949525
Arhgap17_E9QAJ9_S669s_1	-0.75	0.59	1.17	0.58	0.24	-0.48	0.16	-0.14	1.22	0.89	0.48	0.71	0.61	0.45	0.07	0.43	-0.4525	0.4275	-0.0075	0.30704	0.336601	0.986086	1	0.999631	0.995133
Arhgap17_E9QAJ9_S671s_1	-0.1	0.4	1.17	0.58	0.06	-0.34	0.19	-0.07	0.89	1.08	0.62	0.76	0.66	0.77	0.42	0.43	-0.5525	0.325	0.0575	0.116872	0.338933	0.865991	1	0.999631	0.955982
Arhgap20_Q6IFT4_S46s_1	0.8	1.31	0.55	1.33	1.35	1.46	0.98	1.6	1.72	0.89	1.81	1.35	1.03	1.88	0.89	1.7	0.35	0.445	0.3775	0.258249	0.20363	0.308893	1	0.999631	0.718845
Arhgap21_B7ZCJ0_S1090s_2	0.81	-0.64	-0.31	1.06	1.44	-0.09	1.35	1	0.99	-0.27	0.4	0.51	-1.96	-1.84	-0.12	-0.34	0.695	0.1775	-1.295	0.192836	0.708193	0.0481372	1	0.999631	0.48343
Arhgap21_B7ZCJ0_S1093s_2	0.81	-0.64	-0.31	1.06	1.44	-0.09	1.35	1	0.99	-0.27	0.4	0.51	-1.96	-1.84	-0.12	-0.34	0.695	0.1775	-1.295	0.192836	0.708193	0.0481372	1	0.999631	0.48343
Arhgap21_B7ZCJ0_S1502s_1	0.74	1.19	0.33	-0.04	0.6	1.4	0.44	-0.06	1.15	1.21	0.67	0.52	0.5	0.92	0.68	0.63	0.04	0.3325	0.1275	0.921212	0.35783	0.71043	1	0.999631	0.899851
Arhgap21_B7ZCJ0_S1729s_1	0.81	1.37	0.42	0.78	0.92	0.32	-0.2	0.92	0.59	0.71	0.62	0.58	-0.05	0.72	0.3	1.17	-0.355	-0.22	-0.31	0.33448	0.450922	0.411834	1	0.999631	0.767937
Arhgap21_B7ZCJ0_S42s_1	-0.7	-0.12	-0.14	-1.08	-0.06	-0.19	-0.81	-0.8	-0.45	-0.73	-0.49	0.04	0.56	0.12	-0.6	-0.41	0.045	0.1025	0.4275	0.894817	0.758869	0.281562	1	0.999631	0.702855
Arhgap21_B7ZCJ0_S436s_1	-1.5	-1.43	-2.99	-1.86	-2.28	-2.61	-1.65	-2.53	-2.18	-1.59	-2.3	-3.45	-1.03	-1.91	-2.6	-3.19	-0.3225	-0.435	-0.2375	0.447585	0.396283	0.66609	1	0.999631	0.88264
Arhgap21_B7ZCJ0_S470s_1	-0.14	1	0.04	-0.38	0.27	-0.82	-0.65	0.27	0.75	-1.23	-0.06	0.01	0.55	0.47	1.17	0.52	-0.3625	-0.2625	0.5475	0.394733	0.592241	0.172049	1	0.999631	0.641657
Arhgap21_B7ZCJ0_S478s_1	-1.33	-0.72	-0.91	-1.01	-1.14	-1.4	-1.25	-1.36	-0.94	-0.4	-1.79	-1.68	-0.22	-0.22	-1.86	-1.39	-0.295	-0.21	0.07	0.262818	0.579331	0.87346	1	0.999631	0.959788
Arhgap21_B7ZCJ0_S687s_1	-1.09	-1.05	-0.64	-1.02	-1.19	-1.43	-0.84	-0.81	-1.37	-1.16	-0.55	-0.31	-1.28	-0.78	-0.9	-0.86	-0.1175	0.1025	-0.005	0.666871	0.753578	0.985907	1	0.999631	0.995133
Arhgap21_B7ZCJ0_T62t_1	-1.72	0.65	-0.53	-0.52	-0.37	-0.53	-0.43	-1.01	0.47	-1.29	1.12	0.02	0.5	0.46	0.5	-0.38	-0.055	0.61	0.8	0.908529	0.348106	0.137279	1	0.999631	0.610369
Arhgap21_B7ZCJ0_T686t_1	-1.09	-1.05	-0.64	-1.02	-1.19	-1.43	-0.84	-0.81	-1.37	-1.16	-0.55	-0.31	-1.28	-0.78	-0.9	-0.86	-0.1175	0.1025	-0.005	0.666871	0.753578	0.985907	1	0.999631	0.995133
Arhgap22_Q8BL80_S22s_1	0.52	1.19	0.78	0.82	0.22	0.69	0.66	0.34	0.63	1.15	0.73	0.64	-0.12	0.58	0	0.76	-0.35	-0.04	-0.5225	0.216951	0.886736	0.136537	1	0.999631	0.609945
Arhgap22_Q8BL80_S387s_1	0.95	1.07	-0.88	-1.11	0.13	0.9	-0.27	0.25	0.74	1.73	0.59	1	0.62	0.92	-1.5	0.16	0.245	1.0075	0.0425	0.670563	0.107932	0.951745	1	0.999631	0.984166
Arhgap23_F8VQ11_S1182s_1	0.24	0.53	0.1	0.24	0.59	0.04	-0.09	0.3	0.17	0.69	0.07	0.18	0.86	0.61	-0.05	0.19	-0.0675	0	0.125	0.802061	1	0.691289	1	1	0.893997
Arhgap23_F8VQ11_S145s_1	0.14	0.3	0.43	0.2	0.33	0.11	0.03	0.3	0.73	0.49	0.13	0.35	0.56	0.75	0.3	0.21	-0.075	0.1575	0.1875	0.754788	0.552328	0.505623	1	0.999631	0.814836
Arhgap23_F8VQ11_S155s_1	-0.79	0.05	0.2	-0.61	-0.31	-0.59	-0.66	-0.51	-0.5	-0.37	-0.35	-0.05	0.16	-0.02	-0.01	0.48	-0.23	-0.03	0.44	0.464369	0.925331	0.211389	1	0.999631	0.665474
Arhgap23_F8VQ11_S166s_1	-1.13	-0.48	-0.34	-0.55	-0.81	-0.84	-0.94	-0.22	-0.77	-0.9	-0.32	-0.56	-0.38	-0.23	-0.36	-0.21	-0.0775	-0.0125	0.33	0.796929	0.966253	0.276808	1	0.999631	0.700187
Arhgap23_F8VQ11_S215s_1	1.09	0.15	0.6	1.26	0.93	0.31	0.79	1.24	0.44	-0.03	1.15	0.99	-0.75	0.48	0.87	0.6	0.0425	-0.1375	-0.475	0.902642	0.723043	0.296214	1	0.999631	0.709528
Arhgap23_F8VQ11_S344s_1	-0.72	-0.42	-0.3	-0.04	0.39	-0.26	0.28	0.74	-0.19	-0.67	-1.38	0.31	-0.17	-0.17	0.9	0.4	0.6575	-0.1125	0.61	0.0550999	0.778424	0.106068	1	0.999631	0.568797
Arhgap23_F8VQ11_S388s_1	0.16	1.85	1.89	0.95	3.02	1.27	3.03	1.8	4.66	0.18	2.93	4.08	3.39	0.76	2.11	0.61	1.0675	1.75	0.505	0.0789864	0.0858501	0.467827	1	0.999631	0.795565
Arhgap23_F8VQ11_S400s_1	0.79	0.54	0.48	0.36	0.71	0.8	0.61	0.58	0.92	0.43	0.62	0.6	-0.27	0.96	0.69	0.74	0.1325	0.1	-0.0125	0.586373	0.702429	0.971254	1	0.999631	0.989721
Arhgap23_F8VQ11_S413s_1	-0.36	-0.3	0.66	0.21	0.79	-0.13	0.97	0.8	0.1	-0.38	1.17	1.93	0.33	0.31	1.37	0.53	0.555	0.6525	0.5825	0.15297	0.240971	0.149749	1	0.999631	0.621978
Arhgap23_F8VQ11_T127t_1	-1.08	0.26	-0.82	-0.5	-0.15	-0.2	0.06	-0.24	0.08	-1.29	0.17	0.41	0.41	0.02	-0.06	0.27	0.4025	0.3775	0.695	0.248283	0.426347	0.0772479	1	0.999631	0.542683
Arhgap23_F8VQ11_T897t_1	0.75	0.71	2.27	1.03	-0.24	1.22	1.2	0.24	0.26	1.24	0.35	0.6	0.56	0.24	0.59	1.16	-0.585	-0.5775	-0.5525	0.24764	0.198766	0.212951	1	0.999631	0.666787
Arhgap24_D3Z5T4_T241t_1	-0.38	-0.44	-1.69	-2.17	-2.1	-2.48	-1.08	-2.35	-3.17	-2.08	-1.71	-1.98	-2.01	-2.61	-2.57	-2.58	-0.8325	-1.065	-1.2725	0.129073	0.0639517	0.0196619	1	0.999631	0.391668
Arhgap25_Q8BYW1_S274s_1	-1.08	-0.92	-0.41	-1.21	-0.97	-0.7	-0.93	-1.13	-0.92	-1.52	-0.26	-0.82	-0.55	-0.65	-0.66	-0.61	-0.0275	0.025	0.2875	0.921423	0.943136	0.33827	1	0.999631	0.731571
Arhgap26_F7D661_S18s_1	-1.38	0.49	-0.16	-0.02	1.21	0.22	1.04	-1.14	0.63	-1.25	0.9	1.51	-0.36	0.12	-1.31	0.35	0.6	0.715	-0.0325	0.331866	0.282589	0.949463	1	0.999631	0.983795
Arhgap31_A6X8Z5_S1163s_1	0.53	1.39	-0.26	0.11	1.22	0.7	-0.41	-0.17	1.13	0.92	-0.48	0.04	1.15	1.73	0.07	-0.03	-0.1075	-0.04	0.2875	0.826238	0.935297	0.585872	1	0.999631	0.849524
Arhgap31_A6X8Z5_S1242s_1	-0.52	0.58	1.26	-0.24	1.77	0.11	0.68	1.66	0.98	-0.67	0.88	1.79	2.01	0.17	2.04	-0.38	0.785	0.475	0.69	0.158936	0.433468	0.313231	1	0.999631	0.719861
Arhgap31_A6X8Z5_S765s_1	-0.82	-0.23	-0.26	-1.08	0.35	-0.2	-0.76	-1.14	0	-0.44	-0.78	-0.51	0.26	0.42	-0.83	0.29	0.16	0.165	0.6325	0.686237	0.611657	0.127915	1	0.999631	0.598425
Arhgap31_A6X8Z5_S850s_1	-0.2	-0.69	0.36	-0.36	-0.48	0.2	-0.12	-0.67	-0.51	0.21	0.3	0.22	-0.39	0.33	0.13	0.62	-0.045	0.2775	0.395	0.892212	0.418934	0.284128	1	0.999631	0.705132
Arhgap32_Q811P8_S1405s_1	0.26	0.59	-0.2	0.48	0.6	0.29	-0.07	0.33	0.5	-0.03	0.09	0.62	-0.09	0.47	0.33	0.34	0.005	0.0125	-0.02	0.986337	0.967383	0.948292	1	0.999631	0.983277
Arhgap32_Q811P8_S1588s_1	1.06	1.04	0.4	1.19	0.9	0.17	0.88	0.67	-0.13	-1.63	0.92	-0.24	-0.47	0.56	0.35	0.75	-0.2675	-1.1925	-0.625	0.389833	0.0422776	0.112527	1	0.999631	0.577306
Arhgap32_Q811P8_S1823s_1	1.57	-0.97	-0.17	0.66	-0.68	-0.21	1.14	-0.34	-0.41	0.71	0.03	-0.29	-1.82	-1.15	-0.08	-1.05	-0.295	-0.2625	-1.2975	0.630486	0.638378	0.0511164	1	0.999631	0.489558
Arhgap32_Q811P8_S1876s_1	0.62	1.8	1.67	-1.03	2.52	1.33	3.73	0.38	3.68	0.76	3	3.68	2.91	-0.22	0.21	-0.52	1.225	2.015	-0.17	0.171918	0.0344218	0.8473	1	0.999631	0.948838
Arhgap32_Q811P8_S47s_1	-0.9	-0.36	-0.29	-0.01	0.56	-0.55	-0.29	0.3	0.79	0.1	-0.26	0.42	-0.74	-0.41	0.29	0.5	0.395	0.6525	0.3	0.272102	0.0780175	0.438602	1	0.999631	0.781983
Arhgap32_Q811P8_S613s_1	0.74	-0.99	-1.35	0.49	1.46	-0.57	1.12	0.07	-0.03	-1.28	0.22	-0.64	-0.91	-0.38	-1.12	-0.68	0.7975	-0.155	-0.495	0.224764	0.786368	0.350314	1	0.999631	0.737237
Arhgap32_Q811P8_S655s_1	0.82	-0.59	-2.18	0.77	1.2	0.04	0.33	0.18	0.91	-0.46	-0.15	-0.62	-1.46	0.15	-1.83	-0.78	0.7325	0.215	-0.685	0.290334	0.759458	0.360494	1	0.999631	0.741182
Arhgap32_Q811P8_S682s_1	0.38	1.36	1.98	1.75	1.02	1.35	1.68	1.87	1.64	0.14	1.94	1.95	0.71	0.36	2.22	2.11	0.1125	0.05	-0.0175	0.780297	0.923792	0.974661	1	0.999631	0.990998
Arhgap32_Q811P8_S856s_1	-2.27	-1.02	0.73	-0.06	-1.13	-1.69	-0.42	-0.19	-1.72	-2.32	0.73	0.72	0.28	-0.9	0.07	0.54	-0.2025	0.0075	0.6525	0.756782	0.993313	0.325123	1	0.999631	0.72463
Arhgap32_Q811P8_S892s_1	1.71	-0.54	-2.25	1.09	2.62	0.32	1.3	0.9	0.53	-1.84	0.02	-1.64	-2.46	-0.16	-0.92	-0.43	1.2825	-0.735	-0.995	0.167244	0.435232	0.276851	1	0.999631	0.700187
Arhgap32_Q811P8_S935s_1	-0.36	0.33	-0.94	-0.51	0.07	0	-0.57	-0.34	-0.2	-1.06	-1.15	-0.04	-0.52	0.33	0.04	-0.5	0.16	-0.2425	0.2075	0.638792	0.549526	0.583652	1	0.999631	0.848843
Arhgap32_Q811P8_S952s_1	-0.95	-0.46	-1.06	-0.69	-0.47	-1.13	-0.94	-1.07	-0.44	-1.25	-0.46	-0.65	-0.32	-0.64	-0.77	-0.85	-0.1125	0.09	0.145	0.69025	0.76797	0.623049	1	0.999631	0.862913
Arhgap33_Q80YF9_S1144s_1	0.85	0.06	-0.63	0.11	0.75	0.11	0.73	-0.24	0.51	1.27	2.08	0.21	1.48	0.62	-0.01	0.7	0.24	0.92	0.6	0.546956	0.0864629	0.18921	1	0.999631	0.648664
Arhgap33_Q80YF9_S594s_1	0.12	-0.91	-0.77	-0.45	-0.71	-0.6	-0.38	-0.36	-0.43	-0.05	-0.71	-0.85	-0.71	-0.68	-0.65	-0.31	-0.01	-0.0075	-0.085	0.973737	0.982211	0.794079	1	0.999631	0.928498
Arhgap33_Q80YF9_S660s_1	-0.97	-0.85	-0.01	-0.03	-0.27	-1.09	-0.51	0.08	-0.43	-0.16	0.34	0.7	0.27	-0.61	0.26	0.77	0.0175	0.5775	0.6375	0.962588	0.154225	0.140128	1	0.999631	0.611718
Arhgap33_Q80YF9_S887s_1	-0.22	0.08	-0.63	-0.32	-0.17	0.3	-0.88	-0.68	-0.1	-0.27	-0.5	-0.53	-0.39	0.17	-0.2	-0.05	-0.085	-0.0775	0.155	0.802105	0.780649	0.604787	1	0.999631	0.85817
Arhgap33_Q80YF9_S949s_1	0.94	-0.87	-1.17	0.37	0.58	-0.18	0.32	-0.01	-0.29	0.11	-0.55	-1.1	-1.3	-0.38	-0.64	-0.82	0.36	-0.275	-0.6025	0.474778	0.603503	0.255232	1	0.999631	0.690381
Arhgap33_Q80YF9_S949s_2	0.54	0.63	-1.32	-0.68	1.75	1.03	-0.93	-1.01	1.12	1.03	-1.12	-1.77	1.22	0.73	-0.85	-1	0.4175	0.0225	0.2325	0.576901	0.976804	0.724215	1	0.999631	0.905674
Arhgap33_Q80YF9_S998s_1	-0.5	-0.34	-1.84	-0.65	0.14	-1.41	0.49	-0.68	0.14	-2.18	1.01	-0.13	-1.36	-1.8	-2.13	-1.99	0.4675	0.5425	-0.9875	0.369705	0.430776	0.0319837	1	0.999631	0.442395
Arhgap33_Q80YF9_T943t_1	-1.94	0.13	-0.66	-1.66	-1.23	-1.14	-1.42	-0.64	-0.7	-0.01	-1.19	-0.46	0.54	-0.56	-0.78	-0.77	-0.075	0.4425	0.64	0.875183	0.391412	0.248559	1	0.999631	0.685751
Arhgap33_Q80YF9_T943t_2	0.54	0.63	-1.32	-0.68	1.75	1.03	-0.93	-1.01	1.12	1.03	-1.12	-1.77	1.22	0.73	-0.85	-1	0.4175	0.0225	0.2325	0.576901	0.976804	0.724215	1	0.999631	0.905674
Arhgap35_Q91YM2_S1134s_1	-2.15	0.15	-0.18	-1.72	-0.28	0.38	-0.37	-1.62	-0.26	-1.41	-0.88	-0.18	-0.2	-0.91	-1.27	-0.94	0.5025	0.2925	0.145	0.432992	0.617174	0.796868	1	0.999631	0.929952
Arhgap35_Q91YM2_S1134s_2	-1.27	-1.39	-0.78	0.3	0.23	-0.64	0.79	-0.65	0.29	-0.07	1.04	1.08	-2.8	-1.07	0.73	0.36	0.7175	1.37	0.09	0.167144	0.0140733	0.907828	1	0.999631	0.96989
Arhgap35_Q91YM2_S1142s_1	-0.61	-0.96	-0.81	-1.35	-0.83	-1.12	-0.56	-0.38	-0.89	-1.67	-0.75	-0.15	-0.58	-1.1	-0.19	-2.45	0.21	0.0675	-0.1475	0.48028	0.857048	0.766809	1	0.999631	0.916961
Arhgap35_Q91YM2_S1142s_2	-1.27	-1.39	-0.78	0.3	0.23	-0.64	0.79	-0.65	0.29	-0.07	1.04	1.08	-2.8	-1.07	0.73	0.36	0.7175	1.37	0.09	0.167144	0.0140733	0.907828	1	0.999631	0.96989
Arhgap35_Q91YM2_S975s_1	-1.07	-0.29	-0.46	-0.26	-0.4	-0.18	-0.79	-0.21	-0.48	-0.48	-0.19	-0.07	0.89	-0.13	-0.36	-0.68	0.125	0.215	0.45	0.677142	0.47339	0.285131	1	0.999631	0.705851
Arhgap39_H7BX46_S117s_1	1.56	-1.52	0.92	-0.56	-2.57	0.31	2.28	-2.13	-1.76	2.02	-0.63	-1.96	-0.87	-2.37	-0.7	-2.28	-0.6275	-0.6825	-1.655	0.583691	0.498116	0.0440916	1	0.999631	0.475443
Arhgap39_H7BX46_S125s_1	1.74	-3.18	-0.88	-1.66	-3.19	-1.66	2.98	-4.3	-8.51	1.33	-1.64	-2.77	-2.04	-3.78	-3.12	-3.24	-0.5475	-1.9025	-2.05	0.734685	0.341258	0.0503666	1	0.999631	0.488571
Arhgap39_H7BX46_S171s_1	-0.67	-0.22	0.01	-0.58	-0.82	-0.09	-0.81	-0.57	-0.55	-0.5	-0.25	0.02	0.22	-0.04	-0.19	-0.05	-0.2075	0.045	0.35	0.491553	0.876996	0.25099	1	0.999631	0.686822
Arhgap39_H7BX46_S297s_1	2.51	0.63	1.61	1.58	0.11	1.84	1.5	0.4	1.43	1.71	0.16	-0.12	0.47	0.06	0.05	-0.3	-0.62	-0.7875	-1.5125	0.255978	0.175546	0.00498778	1	0.999631	0.351308
Arhgap39_H7BX46_S364s_1	0.48	0.29	-0.43	0.38	1.65	0.88	0.31	0.4	0.6	-0.67	0.37	-0.9	0.3	-0.18	-1.54	0.06	0.63	-0.33	-0.52	0.123941	0.446712	0.270987	1	0.999631	0.698674
Arhgap39_H7BX46_S382s_1	0.2	0	-0.36	0.2	0.36	-0.36	0.31	-0.57	-0.57	-0.55	-0.02	0.03	-0.53	-0.35	-1.18	0.16	-0.075	-0.2875	-0.485	0.814049	0.339033	0.19588	1	0.999631	0.653145
Arhgap39_H7BX46_S599s_1	-0.54	0.02	0.12	0.68	0.24	-0.27	0.28	-0.18	-0.86	-0.34	0.39	0.28	-0.01	-0.06	0.26	0.85	-0.0525	-0.2025	0.19	0.873234	0.612487	0.609092	1	0.999631	0.858851
Arhgap39_H7BX46_S639s_1	0.03	-0.86	-1.33	-0.28	-0.68	-1.01	-0.32	-0.42	-1.65	-0.6	-0.11	0.69	-1.49	-0.42	0.69	-0.31	0.0025	0.1925	0.2275	0.994488	0.720367	0.658184	1	0.999631	0.879726
Arhgap39_H7BX46_S685s_1	0.01	-0.82	-0.3	0.31	-0.11	-0.36	-0.2	0.45	0.07	-0.93	0.5	-0.76	-1.49	0.16	0.18	0.44	0.145	-0.08	0.0225	0.667631	0.84896	0.963102	1	0.999631	0.987129
Arhgap39_H7BX46_T532t_1	2.48	0.78	-0.33	1.23	2.65	1.57	1.58	0.95	1.3	0.13	1.34	-0.83	-1.26	1.37	-0.3	0.76	0.6475	-0.555	-0.8975	0.30482	0.432602	0.234092	1	0.999631	0.683077
Arhgap44_Q5SSM3_S598s_1	0.27	-2.5	1.01	1.05	-1.27	-1.05	1.3	0.79	-2.05	-1.1	0.77	0.49	-2.96	-2.22	1.31	-0.26	-0.015	-0.43	-0.99	0.986915	0.645497	0.373299	1	0.999631	0.747035
Arhgap44_Q5SSM3_S606s_1	-1.87	-0.79	-0.27	-0.98	-1.25	-0.32	-1.52	-1.19	-1.49	-0.39	-0.94	-0.77	-1.04	-0.41	-0.36	-1.21	-0.0925	0.08	0.2225	0.825342	0.845805	0.593614	1	0.999631	0.853502
Arhgap44_Q5SSM3_S636s_1	0.58	-0.74	-0.73	0.24	0.86	0.01	0.3	0.64	-0.13	-0.99	0.09	-0.35	-0.85	-0.14	-0.01	-0.13	0.615	-0.1825	-0.12	0.141864	0.662083	0.769035	1	0.999631	0.918318
Arhgap44_Q5SSM3_S805s_1	0.53	1.83	1.61	1.31	1.36	1.71	1.08	1.34	1.49	1.12	1.58	1.39	1.29	1.45	1.2	1.62	0.0525	0.075	0.07	0.878874	0.827486	0.843038	1	0.999631	0.948139
Arhgap5_E9PYT0_S1219s_1	-0.76	-0.8	-1.07	-0.67	-0.81	-1.42	-0.73	-0.05	-0.77	-1.44	-0.85	-0.84	-0.74	-0.87	-0.2	-0.12	0.0725	-0.15	0.3425	0.827638	0.592159	0.278524	1	0.999631	0.70098
Arhgap5_E9PYT0_S968s_1	-0.29	0.47	0.35	0.51	0.27	-0.27	0.33	0.9	0.01	-1.27	0.73	-0.71	0.39	0.44	0.59	0.6	0.0475	-0.57	0.245	0.888539	0.234318	0.422029	1	0.999631	0.773027
Arhgap5_E9PYT0_T1218t_1	-0.76	-0.8	0	-0.27	-0.81	-1.42	-0.25	-0.14	-0.77	-1.44	-0.66	-0.11	-0.74	-0.87	-0.1	0.36	-0.1975	-0.2875	0.12	0.596845	0.438831	0.753768	1	0.999631	0.913377
Arhgdia_Q99PT1_S34s_1	0.61	1.75	-0.51	0.66	0.85	1.02	0	0.98	1.04	0.54	0.47	0.45	-0.96	1.2	-0.02	0.58	0.085	-0.0025	-0.4275	0.862322	0.995724	0.478254	1	0.999631	0.800612
Arhgdia_Q99PT1_Y133y_1	-0.14	-1.75	-0.7	-0.4	-0.98	-1.5	-0.55	-0.72	-1.08	-0.22	-1.37	-1.87	-1.63	-3.51	-1.23	-2.41	-0.19	-0.3875	-1.4475	0.644556	0.423721	0.0269157	1	0.999631	0.422772
Arhgef1_E9PUF7_S961s_1	-1.33	0.38	0.21	-0.5	0.34	-0.6	0.15	0.38	0.03	-0.1	0.24	0.63	-0.39	-0.31	-1.45	0.25	0.3775	0.51	-0.165	0.399878	0.246275	0.743638	1	0.999631	0.90976
Arhgef1_E9PUF7_T429t_1	1.16	0.19	-0.04	0.98	0.82	-0.1	0.83	0.55	0.61	0.61	0.64	0.53	-0.84	-0.01	0.32	0.36	-0.0475	0.025	-0.615	0.900326	0.941327	0.164077	1	0.999631	0.632208
Arhgef10_Q8C033_S7s_1	0.32	0.17	-0.43	-0.42	-0.91	-1.01	-0.71	-0.85	-0.91	0.37	-1.2	-0.37	0.43	-0.25	-0.87	-0.04	-0.78	-0.4375	-0.0925	0.0194569	0.296486	0.804683	1	0.999631	0.934231
Arhgef10_Q8C033_S852s_1	-0.43	-0.62	-1.29	-1.27	0.08	-0.17	-2.11	-1.62	0	-0.22	-1.57	-1.93	0.61	-0.58	0.32	-0.89	-0.0525	-0.0275	0.7675	0.921931	0.956272	0.0979481	1	0.999631	0.560722
Arhgef11_Q68FM7_S1125s_1	-0.49	-0.22	1.02	0.04	0.28	-0.8	0.86	-0.45	1.25	-1.02	0.95	2.34	1.54	-0.88	0.69	-0.32	-0.115	0.7925	0.17	0.807851	0.26758	0.769248	1	0.999631	0.918358
Arhgef11_Q68FM7_S1353s_1	1.82	0.74	-0.44	-0.17	2.32	1.25	0.62	0.6	1.62	1.02	0.62	0.57	0.6	0.76	-1.55	-0.34	0.71	0.47	-0.62	0.246683	0.384268	0.358357	1	0.999631	0.741182
Arhgef11_Q68FM7_S1488s_1	-0.78	-0.24	-0.63	-0.65	-0.25	-0.3	-0.5	-0.74	-0.27	-0.25	-0.52	-0.11	-0.12	0.02	-0.27	-0.19	0.1275	0.2875	0.435	0.629491	0.291122	0.138593	1	0.999631	0.611124
Arhgef11_Q68FM7_S253s_1	-1.27	-0.85	-0.15	0.62	0.66	-1.78	0.88	0.17	-0.05	-2.98	0.93	0.81	-0.77	-2.03	0.2	0.09	0.395	0.09	-0.215	0.550164	0.917847	0.721812	1	0.999631	0.905674
Arhgef11_Q68FM7_S295s_1	-0.51	-0.43	-0.27	0.21	-0.18	-0.7	-0.71	0.05	-0.68	-0.55	-0.21	0.07	0.49	0.11	-0.43	0.31	-0.135	-0.0925	0.37	0.661717	0.762401	0.277768	1	0.999631	0.700874
Arhgef11_Q68FM7_S311s_1	0.61	-0.77	-1.01	0.35	0.98	-0.22	0.11	0.22	0.09	-0.22	0.24	0.1	-0.64	0.35	-0.17	0.29	0.4775	0.2575	0.1625	0.310208	0.541815	0.723752	1	0.999631	0.905674
Arhgef11_Q68FM7_S585s_1	1.06	0.22	-1.16	2.1	3.52	1.34	1.72	1.45	2.35	-0.88	1.07	0.9	-0.37	1.32	1.2	0.23	1.4525	0.305	0.04	0.0782567	0.716232	0.954843	1	0.999631	0.984441
Arhgef11_Q68FM7_S663s_1	-1.33	-0.09	-0.65	0.64	0.26	0.42	-0.12	0.21	0.88	-0.1	-0.14	0.79	-0.33	-0.13	0.67	0.22	0.55	0.715	0.465	0.217038	0.160341	0.329569	1	0.999631	0.726614
Arhgef11_Q68FM7_S665s_1	-0.27	0.07	-0.16	0.3	0.04	-0.11	-0.17	0.45	-0.23	-0.22	0.05	0.25	-0.92	0.71	0.3	0.42	0.0675	-0.0225	0.1425	0.806336	0.93475	0.724696	1	0.999631	0.905674
Arhgef12_F8VQN6_S1177s_1	-2.16	-1.35	-4.9	-3.08	-1.28	-1.69	-3.62	-4.05	-2.6	-1.17	-3.41	-5.14	-2.67	-0.94	-3.23	-1.81	0.2125	-0.2075	0.71	0.811478	0.831308	0.382286	1	0.999631	0.753668
Arhgef12_F8VQN6_S1328s_1	-0.28	0.49	0.05	0.26	0.12	0.31	0.52	-0.32	0.26	0	0.42	0.72	0.43	0	0.81	0.55	0.0275	0.22	0.3175	0.927645	0.468739	0.332386	1	0.999631	0.728079
Arhgef12_F8VQN6_S190s_1	-0.29	-0.8	0.13	-0.53	-0.67	-0.43	-0.08	-0.27	-0.05	0.12	0.29	0.38	0.44	-0.09	-0.47	0.04	0.01	0.5575	0.3525	0.97322	0.085705	0.311444	1	0.999631	0.71924
Arhgef12_F8VQN6_S342s_1	-0.76	0	-1.72	-1.79	-0.85	-1.08	-0.83	-1.67	-0.74	-0.29	-0.97	-1.07	-0.46	-1.93	-0.82	-0.67	-0.04	0.3	0.0975	0.929519	0.511018	0.848834	1	0.999631	0.949525
Arhgef12_F8VQN6_T737t_1	2.67	1.02	0.65	0.96	0.54	2.1	2.11	0.13	0.72	1.01	0.77	0.33	-1.12	-0.16	0.46	-0.17	-0.105	-0.6175	-1.5725	0.865494	0.203218	0.0130025	1	0.999631	0.385092
Arhgef17_Q80U35_S142s_1	-1.01	0.17	0.64	-0.42	0.01	0.39	-0.4	-0.6	-0.21	0.47	-0.08	-1.49	-0.14	-0.51	-0.93	0	0.005	-0.1725	-0.24	0.990433	0.738487	0.575408	1	0.999631	0.846085
Arhgef17_Q80U35_S152s_1	-0.52	-1.34	0.95	-1.89	-1.23	-0.82	-0.7	-1.11	-1.49	-0.13	-0.02	-0.11	0.66	-0.36	0.55	0.66	-0.265	0.2625	1.0775	0.645798	0.683198	0.0995071	1	0.999631	0.562298
Arhgef17_Q80U35_S2005s_1	-0.05	0.24	0.11	-0.32	-1.08	0.1	-0.82	0.58	-0.09	0.05	-2.01	0.09	0.18	0.41	0.68	-0.2	-0.3	-0.485	0.2725	0.468428	0.340956	0.393026	1	0.999631	0.758901
Arhgef18_Q6P9R4_S577s_1	-0.16	0.48	0.41	-0.31	-0.06	0.33	-0.41	0.23	0.35	0.45	0.15	0.71	0.47	0.73	0.54	0.56	-0.0825	0.31	0.47	0.792125	0.32081	0.147134	1	0.999631	0.61916
Arhgef2_H3BJU7_S617s_1	0.17	0.58	-0.17	0.29	0.44	0.09	0.38	0.23	0.38	0.17	0.58	0.42	0.68	0.3	-0.52	0.62	0.0675	0.17	0.0525	0.801572	0.543731	0.885268	1	0.999631	0.963505
Arhgef2_H3BJU7_S856s_1	0.68	0.87	0.25	1.06	1.37	0.22	0.92	0.72	0.59	-0.24	0.93	1.27	-0.82	0.54	0.53	-0.37	0.0925	-0.0775	-0.745	0.781937	0.841021	0.0887364	1	0.999631	0.553858
Arhgef2_H3BJU7_S902s_1	0.28	0.66	-0.26	-0.13	0.16	0.33	-0.03	-0.47	0.71	0.8	0.15	-0.19	1.05	0.16	-0.7	-0.94	-0.14	0.23	-0.245	0.662459	0.518385	0.614144	1	0.999631	0.860996
Arhgef2_H3BJU7_S911s_1	-1.57	0.97	0.44	-1.82	-1.6	1.1	-0.72	-1.04	0.74	0.7	-0.57	0.44	3.2	1.41	0.66	0.46	-0.07	0.8225	1.9275	0.930071	0.24773	0.0375609	1	0.999631	0.458256
Arhgef2_H3BJU7_S926s_1	-0.33	1.52	1.79	-0.28	-0.96	1.27	-0.65	0.35	0.55	1.74	0.48	1.02	1.79	1.49	1.02	1.63	-0.6725	0.2725	0.8075	0.332944	0.642737	0.165049	1	0.999631	0.633483
Arhgef2_H3BJU7_S926s_2	1.69	1.23	-0.82	1.59	2.37	1.31	1.63	1.34	1.44	0.91	1.85	-0.25	-1.88	1.16	0.03	1.01	0.74	0.065	-0.8425	0.221828	0.922328	0.304858	1	0.999631	0.716239
Arhgef2_H3BJU7_S930s_2	1.69	1.23	-0.82	1.59	2.37	1.31	1.63	1.34	1.44	0.91	1.85	-0.25	-1.88	1.16	0.03	1.01	0.74	0.065	-0.8425	0.221828	0.922328	0.304858	1	0.999631	0.716239
Arhgef2_H3BJU7_T766t_1	-0.3	-0.64	0.02	0.17	0.02	-0.69	0.03	0.36	-0.45	-0.38	0.4	0.14	-0.36	0.12	-0.03	0.99	0.1175	0.115	0.3675	0.720831	0.72595	0.342197	1	0.999631	0.73347
Arhgef25_G5E825_T603t_1	-0.74	-0.69	-1.92	-0.76	0.19	-0.45	-0.99	-1.09	0.07	-0.83	-1.05	-0.71	0.05	-0.04	-2.21	0.72	0.4425	0.3975	0.6575	0.302066	0.330978	0.312852	1	0.999631	0.719861
Arhgef26_D3YYY8_S123s_1	-0.93	0.96	-0.34	0.9	-0.19	-0.03	0.08	0.78	0.48	0.49	1.11	1.24	0.29	0.24	1.55	0.65	0.0125	0.6825	0.535	0.979452	0.182834	0.321597	1	0.999631	0.724092
Arhgef26_D3YYY8_S199s_1	-1.7	-0.51	0.21	0.16	-0.56	-0.66	-0.87	-0.95	-1.1	-0.54	-0.93	-0.94	-0.65	0.06	-0.94	-0.53	-0.3	-0.4175	-0.055	0.50187	0.365824	0.908431	1	0.999631	0.969941
Arhgef26_D3YYY8_S202s_1	-1.7	-0.51	0.21	0.16	-0.56	-0.66	-0.87	-0.95	-1.1	-0.54	-0.93	-0.94	-0.65	0.06	-0.94	-0.53	-0.3	-0.4175	-0.055	0.50187	0.365824	0.908431	1	0.999631	0.969941
Arhgef26_D3YYY8_S221s_1	-0.27	-0.35	-0.77	-0.9	0.28	-0.44	0.18	0.79	-0.53	-1.15	0.03	-0.56	0.11	-0.39	-0.36	-0.03	0.775	0.02	0.405	0.0406771	0.952378	0.199676	1	0.999631	0.657804
Arhgef28_G5E8P2_S1198s_1	0.8	-0.64	-0.07	-0.04	-0.82	-0.55	1.53	-0.51	-0.91	1.55	-0.09	-0.75	-0.32	-1.93	-0.22	-1.53	-0.1	-0.0625	-1.0125	0.859571	0.914456	0.0661295	1	0.999631	0.516933
Arhgef4_E9PYK8_S1277s_1	0.23	0.3	-0.02	-0.21	0.09	-0.46	-0.05	-0.3	0.14	0.17	-0.32	-0.05	-0.13	0.55	0.51	0.35	-0.255	-0.09	0.245	0.350616	0.74057	0.422925	1	0.999631	0.773293
Arhgef40_S4R189_S1089s_1	1.75	-0.22	1.09	0.58	0.34	1.3	0.98	-0.35	0.8	1.34	0.57	-0.02	-0.16	-0.34	0.51	0.1	-0.2325	-0.1275	-0.7725	0.653316	0.791456	0.112153	1	0.999631	0.577068
Arhgef40_S4R189_S1494s_1	-1.31	-0.57	-0.3	-0.33	-1.37	-0.91	-0.76	-0.63	-1.16	-0.78	-0.95	-0.09	-0.85	-0.86	0.37	-1.5	-0.29	-0.1175	-0.0825	0.386538	0.746202	0.855653	1	0.999631	0.951817
Arhgef6_F6WMJ3_S248s_1	-0.25	-0.06	0.03	-0.53	-0.65	-0.66	-0.66	-0.18	-0.54	-1.01	-0.34	-0.29	-0.05	-0.21	0.16	-0.14	-0.335	-0.3425	0.1425	0.2292	0.256256	0.614969	1	0.999631	0.861203
Arhgef6_F6WMJ3_S511s_1	-0.9	0.12	-0.04	-0.19	-0.39	0.2	-0.79	-0.13	-0.01	-0.47	-0.33	0.2	0.44	0.05	0.28	0.25	-0.025	0.1	0.5075	0.941591	0.759703	0.137357	1	0.999631	0.610409
Arhgef6_F6WMJ3_S663s_1	-0.18	0.11	-0.12	0.06	-0.12	0.2	-0.81	0.24	0.24	0.22	-0.8	-0.33	0.73	0.43	-0.54	-0.39	-0.09	-0.135	0.09	0.771078	0.673324	0.804918	1	0.999631	0.934231
Arhgef6_F6WMJ3_S703s_1	-0.54	0.73	0.67	0.14	0.07	-0.33	-0.31	0.1	-0.1	-0.49	-0.29	0.01	0.55	0.73	0.16	0.55	-0.3675	-0.4675	0.2475	0.304964	0.205144	0.50257	1	0.999631	0.814092
Arhgef7_Q9ES28_S103s_1	-0.78	0.33	-0.45	-0.04	0.36	0.02	-0.14	0.02	0.31	-0.61	0.15	0.29	-0.03	0.33	-0.27	0.34	0.3	0.27	0.3275	0.352645	0.458907	0.353505	1	0.999631	0.73949
Arhgef7_Q9ES28_S176s_1	0.38	-0.54	0.71	0.37	0.01	0.38	0.1	0.02	0.1	0.67	-0.79	-0.06	0.14	-0.02	0.37	-0.42	-0.1025	-0.25	-0.2125	0.753732	0.546579	0.562042	1	0.999631	0.84072
Arhgef7_Q9ES28_S445s_1	-0.38	-0.38	-0.09	-0.58	-0.68	-0.54	-0.71	-0.75	-0.83	-0.35	-0.41	-0.24	-0.09	-0.33	-0.45	-0.07	-0.3125	-0.1	0.1225	0.219614	0.713647	0.660853	1	0.999631	0.880315
Arhgef7_Q9ES28_S621s_1	-0.42	-0.22	-0.66	-0.23	-0.44	-0.48	-0.71	-0.35	-0.4	-0.2	-0.02	-0.06	-0.53	-0.49	-0.3	0.1	-0.1125	0.2125	0.0775	0.654196	0.422296	0.791546	1	0.999631	0.926807
Arhgef7_Q9ES28_S665s_1	0.15	-0.5	-0.79	0.51	0.36	-0.84	0.37	0.12	-0.53	-0.37	0.37	-0.08	-0.69	-0.1	-0.68	0.03	0.16	0.005	-0.2025	0.698676	0.98947	0.601629	1	0.999631	0.856765
Arhgef7_Q9ES28_S719s_1	0.99	0.29	0.51	0.46	-0.53	0.4	0.87	-0.49	0.77	1.05	0.34	0.06	0.12	-0.38	-0.51	-0.91	-0.5	-0.0075	-0.9825	0.215222	0.981491	0.013376	1	0.999631	0.385092
Arhgef7_Q9ES28_S80s_1	0.04	-1.32	0.04	0.13	-1.82	-1.4	0.71	-0.68	-1.4	-0.96	-0.48	-0.9	-1.82	-1.9	0.13	-0.29	-0.52	-0.6575	-0.6925	0.390306	0.129545	0.247108	1	0.999631	0.685751
Arhgef7_Q9ES28_S83s_1	0.1	0.61	-0.52	-1.05	0.02	1.03	-0.94	0.28	0.5	0.46	-0.81	-1.01	0.02	0.06	-3.62	0.12	0.3125	-7.85046e-17	-0.64	0.542599	1	0.461755	1	1	0.792786
Arid1a_E9QAQ7_S1760s_1	-0.35	0.91	1.11	0.42	0.46	0.62	0.16	0.5	0.63	1.03	0.94	1.08	0.12	0.95	1.11	0.68	-0.0875	0.3975	0.1925	0.809156	0.295769	0.640262	1	0.999631	0.870995
Arid1a_E9QAQ7_S365s_1	3.38	0	-0.19	-0.62	-1.94	-0.64	0.87	-0.86	-1.07	2.72	-0.1	0.49	-1.8	-0.19	-1.09	-0.95	-1.285	-0.1325	-1.65	0.192716	0.899823	0.0756048	1	0.999631	0.541044
Arid1a_E9QAQ7_S770s_1	0.04	1.2	0.49	-0.42	0.44	0.53	0.16	-0.39	0.89	0.91	0.02	0.76	1.19	0.99	0.29	0.39	-0.1425	0.3175	0.3875	0.725491	0.44771	0.369243	1	0.999631	0.746224
Arid1b_E9Q6R4_S1549s_1	0.78	1.45	1	0.93	0.93	0.79	0.62	1.23	1.23	1.29	1.09	1.23	1.46	1.51	1.08	1.35	-0.1475	0.17	0.31	0.597674	0.527455	0.301286	1	0.999631	0.714243
Arid1b_E9Q6R4_S1755s_1	0.65	1.61	1.47	0.9	1.52	1.22	0.42	1.89	1.42	1.15	0.98	2.1	1.2	1.61	0.77	1.48	0.105	0.255	0.1075	0.790099	0.491431	0.759819	1	0.999631	0.914614
Arid1b_E9Q6R4_S1756s_1	0.65	1.61	1.47	0.9	1.52	1.22	0.42	1.89	1.42	1.15	0.98	2.1	1.2	1.61	0.77	1.48	0.105	0.255	0.1075	0.790099	0.491431	0.759819	1	0.999631	0.914614
Arid4a_F8VPQ2_S867s_1	-0.03	1.48	-0.04	0.17	0.03	0.19	-0.13	-0.03	0.2	0.6	0.6	-0.5	0.88	0.79	-0.16	0.29	-0.38	-0.17	0.055	0.333821	0.70152	0.900623	1	0.999631	0.967994
Arid5b_Q8BM75_S789s_1	-0.19	-0.39	0.07	-0.39	-0.51	-0.66	-0.45	-0.02	0.08	-0.65	0.17	0.49	-0.15	-0.28	-0.24	0.08	-0.185	0.2475	0.0775	0.496908	0.449613	0.78027	1	0.999631	0.921416
Arl13b_Q640N2_S328s_1	-0.31	-0.2	0.28	-0.37	-0.58	-0.93	-0.52	-0.73	-0.92	-0.09	0	0.6	-0.45	-0.31	-0.32	0.11	-0.54	0.0475	-0.0925	0.0677979	0.898386	0.757342	1	0.999631	0.914449
Arl2_Q9D0J4_S45s_1	-0.46	0.57	0.54	0.19	0.4	0.27	-0.56	0.19	-0.4	0.26	0.12	0.36	0.96	0.87	0.55	0.66	-0.135	-0.125	0.55	0.701583	0.713274	0.120105	1	0.999631	0.587703
Arl6ip6_Q8BH07_T19t_1	1.35	0.84	1.72	1.64	0.63	1.2	0.85	1.27	-0.06	2.06	1.35	0.51	-0.24	1.02	1.19	1.49	-0.4	-0.4225	-0.5225	0.212624	0.393238	0.247662	1	0.999631	0.685751
Armcx4_E9PWM3_S34s_1	1.1	-2.97	0.63	-1.03	-1.91	-0.91	0.78	-0.46	-1.86	-0.34	-2.42	-1.72	-1.52	-1.95	-4.67	-3.1	-0.0575	-1.0175	-2.2425	0.950695	0.269311	0.0444187	1	0.999631	0.475443
Arpc1a_Q9R0Q6_S236s_1	-0.01	0.1	1.1	0.64	-0.23	0.55	0.04	0.52	-0.01	0.46	0.75	0.54	0.31	0.69	0.22	0.48	-0.2375	-0.0225	-0.0325	0.501802	0.947988	0.924082	1	0.999631	0.975324
Arpc5_Q9CPW4_S77s_1	-0.41	0.88	-0.19	0.19	0.04	0.17	-0.43	-0.65	0.54	0.47	0.12	0.01	0.87	0.94	-0.09	0.05	-0.335	0.1675	0.325	0.368353	0.63436	0.43471	1	0.999631	0.779717
Arpc5l_Q9D898_S64s_1	1.35	1.69	0.96	0.64	0.19	1.52	1.19	-0.16	0.95	1.32	0.26	0.17	1.34	0.99	0.01	0.1	-0.475	-0.485	-0.55	0.301232	0.222271	0.206057	1	0.999631	0.6605
Arpp19_P56212_S2s_1	-0.03	0.81	0.83	0.56	1	0.48	0.65	0.53	0.34	-0.53	1.11	0.6	0.35	0.17	1.02	0.42	0.1225	-0.1625	-0.0525	0.681642	0.690478	0.876795	1	0.999631	0.961373
Arpp19_P56212_S7s_1	-2.52	-4.09	-3.8	-4.35	-4.79	-4	-3.97	-4.48	-5.45	-2.99	-4.73	-6.09	-3.17	-4.58	-5.09	-3.48	-0.62	-1.125	-0.39	0.180596	0.131016	0.493389	1	0.999631	0.80955
Arpp19_P56212_T22t_1	-2.41	-1.24	-2.29	-3.03	-1.93	-1.84	-1.76	-2.8	-1.91	-2.26	-1.44	-1.21	-0.95	-0.62	-3	-2.31	0.16	0.5375	0.5225	0.712937	0.236805	0.401829	1	0.999631	0.763221
Arpp19_P56212_T6t_1	-2.41	-1.24	-2.29	-3.03	-1.93	-1.84	-1.76	-2.8	-1.91	-2.26	-1.44	-1.21	-0.95	-0.62	-3	-2.31	0.16	0.5375	0.5225	0.712937	0.236805	0.401829	1	0.999631	0.763221
Arpp21_E0CYU3_S32s_1	1.04	1.43	0.92	0.62	1.09	1.52	0.94	0.33	1.76	1.93	1.01	1.16	0.87	0.97	1.58	0.54	-0.0325	0.4625	-0.0125	0.922822	0.184514	0.970627	1	0.999631	0.989618
Arpp21_Q9DCB4_S346s_1	1.49	0.51	1.06	1.32	0.71	1.19	1.51	1.33	1.05	1.65	1.33	1.08	-0.26	0.29	1.01	0.18	0.09	0.1825	-0.79	0.77972	0.568312	0.0587235	1	0.999631	0.501503
Arpp21_Q9DCB4_S362s_1	1.75	0.55	1.03	0.34	1.52	1.75	0.7	0.26	1.92	1.98	-0.13	0.39	0.18	0.74	0.06	-0.71	0.14	0.1225	-0.85	0.757118	0.830141	0.0757063	1	0.999631	0.541044
Arpp21_Q9DCB4_S381s_1	0.6	1.06	1.08	0.84	0.8	0.72	0.55	1.19	0.94	1.24	1.2	1.78	0.89	1.3	1.36	1.71	-0.08	0.395	0.42	0.766745	0.197954	0.187489	1	0.999631	0.646474
Arpp21_Q9DCB4_S408s_1	1.16	1.38	1.13	1.02	1.49	0.67	0.97	1.06	2.53	1.06	0.9	1.29	0	0.3	1.24	0.12	-0.125	0.2725	-0.7575	0.64947	0.494088	0.0517295	1	0.999631	0.489777
Arpp21_Q9DCB4_T87t_1	1.76	0.54	1.31	1.96	1.03	0.91	1.96	1.72	1.17	1.68	1.59	1.71	-0.79	0.8	1.7	1.08	0.0125	0.145	-0.695	0.975513	0.694428	0.239865	1	0.999631	0.683719
Arrb1_J3QNU6_S413s_1	-1.35	1.19	3.31	0.49	1.12	-0.2	2.68	1.53	2.19	-1.41	3.65	4.36	1.69	-1.42	2.69	1.22	0.3725	1.2875	0.135	0.703212	0.358102	0.902846	1	0.999631	0.968183
Arvcf_P98203_S273s_1	-1.01	-1.1	-0.35	-1.09	-1.34	-0.86	-1.79	-1.34	-1.4	-0.4	-0.93	-0.96	0.15	-0.75	-0.74	-0.36	-0.445	-0.035	0.4625	0.178552	0.914744	0.196637	1	0.999631	0.653373
Arvcf_P98203_S281s_1	1.39	-0.98	-1.35	-0.88	-1.5	-0.05	-0.38	-1.49	-0.94	1.35	-1.16	-1.69	-0.39	-1.1	-1.23	-1.95	-0.4	-0.155	-0.7125	0.542149	0.847166	0.275201	1	0.999631	0.700187
Arvcf_P98203_S283s_1	1.3	-1.11	-0.81	-0.4	-1.09	-0.35	-0.01	-1.31	-1.13	0.92	-1.16	-1.35	-0.8	-1.89	-1.31	-1.64	-0.435	-0.425	-1.155	0.448716	0.535455	0.0573188	1	0.999631	0.49679
Arvcf_P98203_S873s_1	1.52	0.32	-0.39	0.32	0.25	0.7	0.58	0.11	0.33	-0.2	0.36	-1.09	-1.08	0.64	-0.39	0.06	-0.0325	-0.5925	-0.635	0.937795	0.249846	0.232413	1	0.999631	0.682449
Arvcf_P98203_T573t_1	-1.65	1.15	1.27	-0.6	0.32	1.42	0.38	0.97	1.75	-2.04	0.49	2.34	1.96	0.02	0.94	0.87	0.73	0.5925	0.905	0.291669	0.570608	0.225725	1	0.999631	0.676382
Asap1_E9QMJ1_S1010s_1	0.53	-0.04	-0.45	1.24	3.56	0.28	5.24	1.24	3.54	0.62	3.33	2.68	0.46	-0.26	0.52	-0.09	2.26	2.2225	-0.1625	0.0475674	0.00832249	0.703702	1	0.999631	0.897149
Asap1_E9QMJ1_S1024s_1	-0.08	0.67	-0.35	-0.01	0.26	0.41	-0.4	-0.17	0.23	-0.13	-0.24	0.22	0.32	-0.08	-0.49	0.35	-0.0325	-0.0375	-0.0325	0.921233	0.904636	0.926064	1	0.999631	0.97588
Asap1_E9QMJ1_S1111s_1	-1.26	-3.01	-2.21	-1.25	-2.97	-2.43	-1.87	-3.76	-2.48	-2.51	-1.43	-2.1	-2.02	-1.77	-3.8	-1.04	-0.825	-0.1975	-0.225	0.149409	0.678598	0.729434	1	0.999631	0.905923
Asap1_E9QMJ1_S505s_1	-0.66	-0.39	-0.36	-0.49	-0.5	-0.39	-0.83	-0.65	-0.67	-0.64	-0.62	-0.22	0.2	-0.3	-0.28	-0.1	-0.1175	-0.0625	0.355	0.634674	0.808193	0.218959	1	0.999631	0.669859
Asap1_E9QMJ1_S819s_1	-1.35	0.38	-0.23	-0.41	-0.99	-0.29	-1.13	-0.65	-0.25	-0.3	-0.64	-0.28	-0.06	-0.36	-0.54	0.2	-0.3625	0.035	0.2125	0.382179	0.928058	0.607996	1	0.999631	0.858527
Asap1_E9QMJ1_S823s_1	2.01	-1.37	-1.53	1.41	2.76	0.24	1.75	0.77	0.67	-0.95	-0.07	-1.04	-1.32	-0.5	-0.73	-1.03	1.25	-0.4775	-1.025	0.199572	0.588489	0.227756	1	0.999631	0.678949
Asap2_D3YX85_S712s_1	2.34	-0.91	-0.46	1.5	1.36	0.84	2	0.89	0.29	1.08	1	-0.49	-3.38	-0.24	0.27	-0.22	0.655	-0.1475	-1.51	0.376487	0.845672	0.145889	1	0.999631	0.616968
Asb3_D6RDR7_S35s_1	0.92	0.76	1.25	1.69	0.69	0.76	0.76	1.63	0.85	1.3	1.31	1.22	-0.33	0.95	1.52	1.22	-0.195	0.015	-0.315	0.568896	0.96069	0.492509	1	0.999631	0.80955
Ash1l_Q99MY8_S1678s_1	1.43	-0.84	0.64	-0.25	-2.18	-1.4	0.83	-1.44	-1.61	0.45	-0.94	-0.54	-1.22	-1.79	-1.22	-2.08	-1.2925	-0.905	-1.8225	0.0988202	0.155157	0.00514268	1	0.999631	0.351308
Asic1_Q6NXK8_S497s_1	1.51	2.9	-1.62	-0.35	4.72	1.29	3.05	0.63	5.13	0.97	2.53	3.07	3.59	1.45	1.76	-0.38	1.8125	2.315	0.995	0.14218	0.064257	0.373508	1	0.999631	0.747035
Aspscr1_Q8VBT9_S116s_1	-1.44	-1.51	-1.54	-1.44	-1.11	-1.36	-1.18	-1.74	-1.75	-1.22	-1.44	-1.31	-1	-1.34	-1.06	-1.1	0.135	0.0525	0.3575	0.599679	0.836787	0.193274	1	0.999631	0.649965
Aspscr1_Q8VBT9_S202s_1	1.05	-0.05	-0.47	0.3	0.33	1.85	0	0.35	0.32	2.3	0.01	-0.06	-1.82	1.66	0.35	0.82	0.425	0.435	0.045	0.39816	0.466901	0.949776	1	0.999631	0.98392
Astn1_Q61137_S192s_1	-1.28	-1.12	-1.75	-2.64	-1.01	-1.16	-1.39	-2.61	-0.67	-1.06	-2.01	-1.46	0.16	-0.49	-1	-0.7	0.155	0.3975	1.19	0.744511	0.377415	0.0185048	1	0.999631	0.391024
Astn1_Q61137_S274s_1	-0.05	0.29	-0.64	0.2	0.06	-0.02	0.03	-0.03	0.05	-0.47	-0.25	-0.25	-0.7	0.01	-0.51	-0.03	0.06	-0.18	-0.2575	0.833868	0.559916	0.454794	1	0.999631	0.789905
Astn1_Q61137_S893s_1	1.3	-0.51	0.24	0.3	-1.29	-0.62	0.44	-0.92	0.34	1.42	-0.64	-1.25	-0.2	-2.59	-0.86	-2.02	-0.93	-0.365	-1.75	0.084683	0.563518	0.0144269	1	0.999631	0.385092
Astn1_Q61137_S898s_1	1.27	-0.89	-0.08	-0.23	-1.08	0.26	0.57	-0.71	0.14	1.5	-0.57	-0.83	-0.35	-2.12	-1.15	-1.67	-0.2575	0.0425	-1.34	0.640971	0.945766	0.0329114	1	0.999631	0.44294
Atad1_Q9D5T0_S322s_1	-1.04	-0.48	-1.16	-0.63	-0.94	-0.43	-0.61	-0.95	-0.82	-0.36	0.06	-0.51	-0.58	0.08	-0.17	-1.63	0.095	0.42	0.2525	0.738578	0.197956	0.553714	1	0.999631	0.837943
Atat1_Q8K341_S249s_1	1.78	-0.63	0.2	1.36	0.44	0.61	1.62	0.86	0.66	1.09	1.23	0.35	-0.91	-0.38	0.92	0.05	0.205	0.155	-0.7575	0.713413	0.775807	0.232775	1	0.999631	0.682707
Atat1_Q8K341_S253s_1	1.56	1.56	0.93	0.98	1.01	2.06	1.6	0.51	2.29	2.36	0.93	0.77	0.64	0.59	0.84	0.15	0.0375	0.33	-0.7025	0.923336	0.471768	0.0467877	1	0.999631	0.480102
Atat1_Q8K341_T238t_1	0.42	0.54	0.33	-0.04	0.25	0.31	0.25	0.46	0.43	0.52	0.22	0.1	0.03	0.65	0.43	0.31	0.005	0.005	0.0425	0.984162	0.985166	0.885021	1	0.999631	0.963505
Atcay_Q8BHE3_S370s_1	0.88	0.1	-0.77	-0.89	0.14	0.11	-0.09	-2.24	0.54	1.07	-1.61	-1.45	-0.2	-0.43	-1.84	-2.39	-0.35	-0.1925	-1.045	0.584411	0.786573	0.112429	1	0.999631	0.577306
Atcay_Q8BHE3_S46s_1	-0.91	-1.02	-1.38	-1.35	-1.3	-1.02	-1.43	-1.44	-0.97	-0.84	-1.77	-1.22	-0.01	-0.62	-1.46	-1.04	-0.1325	-0.035	0.3825	0.611757	0.909215	0.317523	1	0.999631	0.721033
Atf2_P16951_S149s_1	-0.77	0.63	-0.96	-0.08	1.56	-0.29	-0.41	-0.69	-0.19	-0.34	-0.85	-0.18	0.97	0.41	-0.11	0.35	0.3375	-0.095	0.7	0.558454	0.814553	0.128655	1	0.999631	0.599259
Atf2_P16951_S150s_1	-0.77	0.63	-0.96	-0.08	1.56	-0.29	-0.41	-0.69	-0.19	-0.34	-0.85	-0.18	0.97	0.41	-0.11	0.35	0.3375	-0.095	0.7	0.558454	0.814553	0.128655	1	0.999631	0.599259
Atf2_P16951_S212s_2	0.05	1.08	0.48	0.24	-0.46	0.09	0.32	1.38	-0.12	0.09	0.59	1.08	-0.23	0.33	0.33	0.76	-0.13	-0.0525	-0.165	0.765716	0.888507	0.644139	1	0.999631	0.872436
Atf2_P16951_S94s_1	0.24	1.13	1.05	0.6	0.75	0.74	-0.1	0.7	1.15	0.92	0.7	1.16	0.88	1.53	0.91	1.52	-0.2325	0.2275	0.455	0.490746	0.463414	0.201811	1	0.999631	0.658952
Atf2_P16951_T53t_1	-0.62	0.49	1.05	-0.1	0.03	0.93	0.64	1.06	0.3	-1.99	2.16	2.04	1.01	-0.43	0.92	2.64	0.46	0.4225	0.83	0.291734	0.640682	0.221022	1	0.999631	0.671424
Atg16l1_Q8C0J2_S303s_1	1.11	-0.26	0.32	0.6	0.5	-0.32	0.8	0.56	-0.03	0.07	0.75	1	0.01	-0.13	0.18	0.82	-0.0575	0.005	-0.2225	0.88158	0.989912	0.568162	1	0.999631	0.843185
Atg2a_Q6P4T0_S1243s_1	-0.99	0.67	1.2	1.1	-0.12	0.3	-0.26	-0.81	0.03	-1.06	0.66	1.14	1.55	1.6	-0.04	0.15	-0.7175	-0.3025	0.32	0.187782	0.632495	0.602756	1	0.999631	0.857278
Atg2b_Q80XK6_S1571s_1	-0.61	0.38	1.54	1.33	0.21	0.96	0.5	0.85	0.05	0.14	0.69	1.19	-1.09	0.31	1.1	1.54	-0.03	-0.1425	-0.195	0.95126	0.786047	0.773511	1	0.999631	0.92076
Atg2b_Q80XK6_S1581s_1	-0.13	0.28	1.28	0.25	-0.54	-1	-0.29	0.11	-0.24	0.03	-0.34	-1.55	-1.37	0.17	1.22	-1.49	-0.85	-0.945	-0.7875	0.0511757	0.0601269	0.239522	1	0.999631	0.683719
Atg2b_Q80XK6_S1741s_1	0.53	0.75	0.09	0.34	0.85	0.47	0.64	0.96	0.8	0.22	0.26	0.76	0.33	0.81	0.81	0.56	0.3025	0.0825	0.2	0.278522	0.778605	0.502393	1	0.999631	0.814092
Atg2b_Q80XK6_S239s_1	0.28	0.9	0.04	-0.22	0.99	0.64	-0.11	0.4	1.14	0.27	1.16	0.74	1.08	1.14	0.47	1.08	0.23	0.5775	0.6925	0.524733	0.127842	0.0690966	1	0.999631	0.524251
Atg2b_Q80XK6_S240s_1	0.28	0.9	0.04	-0.22	0.99	0.64	-0.11	0.4	1.14	0.27	1.16	0.74	1.08	1.14	0.47	1.08	0.23	0.5775	0.6925	0.524733	0.127842	0.0690966	1	0.999631	0.524251
Atg2b_Q80XK6_S255s_1	0.62	0.57	-0.62	0.44	0.49	0.1	0.6	0.56	0.93	0.12	0.37	-0.25	-1.63	0.22	0.31	0.29	0.185	0.04	-0.455	0.595903	0.919792	0.396895	1	0.999631	0.761093
Atg2b_Q80XK6_S379s_1	-0.01	-0.04	-0.22	2.04	1.44	0.94	1.49	1.46	0.74	-0.24	1.53	0.44	-1.89	0.82	0.76	0.56	0.89	0.175	-0.38	0.10763	0.767891	0.610985	1	0.999631	0.859461
Atg2b_Q80XK6_S885s_1	-0.54	2.03	1.93	1.79	0.83	0.95	1.33	2.47	0.88	0.83	1.39	2.59	1.46	1.8	2.4	2.31	0.0925	0.12	0.69	0.885798	0.856431	0.264416	1	0.999631	0.6935
Atg9a_Q68FE2_S735s_1	0.06	-0.79	-0.28	-0.47	-1.74	-0.41	-0.03	-0.32	-1.08	0.05	-0.39	-0.49	-1.58	-1.9	-0.66	-1.01	-0.255	-0.1075	-0.9175	0.54476	0.751625	0.0310529	1	0.999631	0.44065
Atg9a_Q68FE2_S735s_2	-0.15	-0.45	0.5	-0.52	-1.2	-0.3	0.05	0.13	-0.88	0.11	0.07	-0.01	-0.52	-0.62	-1.17	-1.1	-0.175	-0.0225	-0.6975	0.656365	0.950498	0.0667665	1	0.999631	0.519446
Atg9a_Q68FE2_S738s_2	-0.49	-0.37	0.59	-0.69	-1.3	-0.22	0.01	0.11	-0.67	0.29	-0.16	-0.23	-0.56	-0.54	-0.94	-1.28	-0.11	0.0475	-0.59	0.795988	0.89839	0.138447	1	0.999631	0.611124
Atg9a_Q68FE2_S741s_2	0.5	-0.65	0.25	-0.13	-0.96	-0.49	0.16	0.18	-1.49	-0.4	0.6	0.51	-0.42	-0.83	-1.85	-0.68	-0.27	-0.1875	-0.9375	0.48758	0.716799	0.0449145	1	0.999631	0.475465
Atg9a_Q68FE2_S761s_1	0.59	0.06	0.18	0.9	-0.07	-0.05	0.67	0.76	0.26	-0.06	0.38	1.05	-0.48	0.43	1.04	0.91	-0.105	-0.025	0.0425	0.754034	0.942197	0.917823	1	0.999631	0.97388
Atl1_Q8BH66_S10s_1	-1.3	0.18	-0.66	0.67	1.21	0.33	0.53	0.68	1.05	-1.08	0.62	0.36	0.01	-0.19	0.52	0.96	0.965	0.515	0.6025	0.0581062	0.386746	0.23727	1	0.999631	0.683301
Atl1_Q8BH66_S15s_1	0.22	4.09	0.43	0.05	3.02	4.16	0.74	0.67	3.98	0.92	1.15	1.17	3.4	3.93	1.04	0.39	0.95	0.6075	0.9925	0.401548	0.563544	0.379023	1	0.999631	0.751637
Atl1_Q8BH66_S18s_1	-2.6	0.78	0.77	-1.07	2.54	0.57	0.41	-0.74	2.34	-1.38	0.54	1.48	1.33	0.42	0.63	0.08	1.225	1.275	1.145	0.202954	0.216047	0.151198	1	0.999631	0.624065
Atn1_O35126_S646s_1	0.35	1.27	1.78	0.92	1.17	0.59	0.34	1.19	1.46	1.44	1.18	1.69	1.49	1.79	1.69	1.9	-0.2575	0.3625	0.6375	0.50446	0.320127	0.102139	1	0.999631	0.564448
Atn1_O35126_T654t_1	0.9	2.69	2.31	1.57	1.31	2.31	1.35	2.17	2.2	1.63	2.28	2.35	2.32	2.5	2.08	2.23	-0.0825	0.2475	0.415	0.857218	0.567959	0.335789	1	0.999631	0.730466
Atp11c_F6Q8D3_S1105s_1	0.68	0.24	1.28	0.53	-0.69	-0.45	0.67	0.09	-0.11	0.43	-1.02	0.52	-0.01	-1.41	0.43	0.21	-0.7775	-0.7275	-0.8775	0.0671032	0.107962	0.0819596	1	0.999631	0.54792
Atp13a1_Q9EPE9_S22s_1	0.21	0.26	1.65	0.67	-0.29	0.39	2.42	0.93	0.05	-0.56	1.17	0.81	0.23	-0.72	1.12	0.04	0.165	-0.33	-0.53	0.784035	0.504375	0.291533	1	0.999631	0.706164
Atp13a1_Q9EPE9_S896s_1	-0.98	-2.46	1.56	-0.05	-1.26	-3.94	0.97	1.55	-0.6	-0.68	2.14	2.47	-0.03	-1.38	2.19	1.52	-0.1875	1.315	1.0575	0.883618	0.222771	0.301569	1	0.999631	0.714243
Atp1a1_Q8VDN2_S16s_1	0.47	0.6	1.49	0.44	0.26	1.8	1.01	1.4	0.58	0.48	1.31	1.59	0.97	0.73	1.46	1.27	0.3675	0.24	0.3575	0.381898	0.539779	0.323079	1	0.999631	0.724485
Atp1a1_Q8VDN2_S207s_1	-0.64	-1.46	-1.16	-1.68	-2.44	-1.29	-1.33	-1.15	-1.84	-1.01	-1.96	-1.52	-1.85	-1.89	-1.75	-1.04	-0.3175	-0.3475	-0.3975	0.417891	0.332349	0.277892	1	0.999631	0.700874
Atp1a1_Q8VDN2_S228s_1	-1.08	-0.25	-0.74	-0.95	-0.48	-0.39	-1.36	-1.09	-0.78	-0.52	-1.01	-1.07	-0.34	-0.23	-1.1	-0.5	-0.075	-0.09	0.2125	0.823242	0.763559	0.530498	1	0.999631	0.826702
Atp1a1_Q8VDN2_S40s_1	1.4	-0.38	0.95	0.75	-0.83	0.17	0.81	-0.79	-0.58	0.48	0.39	0.46	-1.03	-1.22	0	-0.64	-0.84	-0.4925	-1.4025	0.125291	0.288135	0.0115127	1	0.999631	0.385092
Atp1a1_Q8VDN2_T485t_1	-0.46	-0.46	-0.1	-1.3	-0.29	-0.55	-0.79	-0.67	-0.42	-0.76	-0.7	0.1	-0.21	-0.26	-0.96	-0.15	0.005	0.135	0.185	0.987618	0.705922	0.613798	1	0.999631	0.860866
Atp1a1_Q8VDN2_Y684y_1	-0.96	0.2	0.8	0.08	0.61	-0.66	1.04	-1.2	1.72	-1.56	-0.13	1.01	1.99	-1.3	0.13	-0.88	-0.0825	0.23	-0.045	0.887175	0.74799	0.950309	1	0.999631	0.984079
Atp1a2_Q6PIE5_S10s_1	-0.25	-1.23	-1	-1.01	-1.59	-0.52	-0.92	-1.22	-0.95	-0.43	-0.53	-0.16	0.03	0.07	-0.57	-0.4	-0.19	0.355	0.655	0.584179	0.290456	0.0744862	1	0.999631	0.540038
Atp1a2_Q6PIE5_S439s_1	-1.13	-1.53	-1.07	-1.34	-1.72	-1.14	-1.27	-1.75	-1.21	-0.95	-0.38	-0.3	-0.11	-0.85	-0.36	-0.81	-0.2025	0.5575	0.735	0.467275	0.0979927	0.0347406	1	0.999631	0.449301
Atp1a2_Q6PIE5_S464s_1	0.25	1.83	1.68	0.98	0.81	1.53	0.11	0.98	1.11	1.13	0.3	-0.81	1.38	1.9	1.5	1.33	-0.3275	-0.7525	0.3425	0.473143	0.187071	0.407421	1	0.999631	0.766996
Atp1a2_Q6PIE5_S496s_1	-0.56	-0.08	-0.32	-0.78	-0.4	-0.13	-1.3	-0.57	-0.47	-0.27	-0.67	-0.04	0.36	0.08	-0.19	-0.04	-0.165	0.0725	0.4875	0.62164	0.80235	0.12628	1	0.999631	0.596745
Atp1a2_Q6PIE5_S58s_1	-1.03	-0.24	0.67	0.08	-0.76	0.49	-0.11	-0.99	-0.84	0.13	0.32	0.97	-0.55	-0.56	2	0.33	-0.2125	0.275	0.435	0.649752	0.578766	0.495544	1	0.999631	0.810848
Atp1a3_Q6PIC6_S206s_1	-0.69	-0.4	-0.83	-1.68	-1.08	0.06	-1.22	-1.25	-0.37	0.22	-1.07	-1.42	0.59	-0.25	-1.65	-1.32	0.0275	0.24	0.2425	0.947086	0.595734	0.656511	1	0.999631	0.879056
Atp1a3_Q6PIC6_S207s_1	-0.63	-0.76	-0.16	-0.96	-1.14	-0.41	-1.02	-1.1	-0.37	0.14	-0.48	-0.75	-0.36	-0.42	-0.5	-0.01	-0.29	0.2625	0.305	0.349211	0.413882	0.327222	1	0.999631	0.724678
Atp1a3_Q6PIC6_S212s_1	0.34	0.04	-0.91	-0.17	-0.91	-0.35	-0.92	-1.24	0.1	0.41	-0.43	-0.06	0.66	-0.52	-0.31	0.16	-0.68	0.18	0.1725	0.077948	0.614288	0.666848	1	0.999631	0.88264
Atp1a3_Q6PIC6_S218s_1	-1.15	-1.05	-0.63	-0.65	-1.09	-0.9	-0.84	-0.74	-1.07	-0.71	-0.91	0.02	-0.04	-0.32	-0.15	-0.61	-0.0225	0.2025	0.59	0.930836	0.542015	0.0689565	1	0.999631	0.52409
Atp1a3_Q6PIC6_S37s_1	0.85	0.96	0.94	0.69	0.32	1.19	0.47	0.56	0.6	0.88	0.44	0.69	1.12	1.07	0.92	1.01	-0.225	-0.2075	0.17	0.431533	0.419071	0.520027	1	0.999631	0.819528
Atp1a3_Q6PIC6_S442s_1	-1.08	0.6	0.46	0.11	0.42	-0.19	-0.04	0.87	-0.1	-0.42	0.32	0.23	0.14	-0.04	1.38	1.41	0.2425	-0.015	0.7	0.583676	0.97152	0.19628	1	0.999631	0.653373
Atp1a3_Q6PIC6_S474s_1	-0.49	0.2	1.31	0.15	-0.12	-0.38	-0.4	0.12	-0.05	-0.57	-1.45	0.9	0.43	-0.07	-0.23	0.83	-0.4875	-0.585	-0.0525	0.239507	0.31701	0.906223	1	0.999631	0.969391
Atp1a3_Q6PIC6_S56s_1	-0.37	0.94	1.63	0.45	0.09	1.37	0.53	0.71	0.73	-0.08	0.46	1.44	1.36	1.57	1.92	1.39	0.0125	-0.025	0.8975	0.978915	0.960039	0.0656378	1	0.999631	0.516933
Atp1a3_Q6PIC6_S643s_1	0.02	1.41	0.22	0.09	0.49	0.67	-0.72	-0.45	0.49	0.4	-0.01	0.09	0.88	1.17	-0.2	-0.36	-0.4375	-0.1925	-0.0625	0.349367	0.609373	0.897814	1	0.999631	0.966758
Atp1a3_Q6PIC6_S712s_1	-0.21	-0.31	-0.53	-0.59	-0.51	-0.49	-0.68	-0.72	-0.56	-1.44	-0.21	-0.2	0.08	-0.1	-0.37	-0.31	-0.19	-0.1925	0.235	0.441278	0.581402	0.40623	1	0.999631	0.766128
Atp1a3_Q6PIC6_T368t_1	1.89	1.58	2.3	1.54	-0.49	1.91	1.05	1.13	-0.21	1.57	1.03	-2.03	-0.87	0.87	0.5	-0.05	-0.9275	-1.7375	-1.715	0.0880185	0.0358251	0.00237928	1	0.999631	0.351308
Atp1a3_Q6PIC6_T370t_1	0.89	0.01	1.19	1.42	-0.43	1.43	1.47	1.4	-0.04	0.17	1.11	-0.71	0.41	0.57	1.12	0.18	0.09	-0.745	-0.3075	0.862416	0.137386	0.44356	1	0.999631	0.782783
Atp1a3_Q6PIC6_T71t_1	-2.82	-1.23	0.76	-1.09	-1.22	-0.22	-0.32	-0.56	-0.54	-1.64	0.18	1.14	0.96	0.05	0.57	1.25	0.515	0.88	1.8025	0.455775	0.298922	0.0244002	1	0.999631	0.416717
Atp2a2_O55143_S553s_1	-0.61	-0.45	-0.21	-0.9	-0.56	-0.43	-1.5	0.69	-0.65	-0.44	1.19	0.88	0.49	-0.16	-0.51	0.09	0.0925	0.7875	0.52	0.838625	0.117852	0.138098	1	0.999631	0.611124
Atp2a2_O55143_S661s_1	-1.79	-0.6	-0.86	-2.7	-0.23	-0.84	-0.37	-1.15	0.23	-1.27	-0.1	0.9	0.66	-0.13	-1.72	-0.8	0.84	1.4275	0.99	0.1129	0.0369515	0.13852	1	0.999631	0.611124
Atp2a2_O55143_S663s_1	-3.2	-0.34	-0.8	-1.82	0.34	-1.61	0.5	-1.45	0.62	-2.69	0.39	0.85	0.85	-1.84	-1.68	-1.03	0.985	1.3325	0.615	0.207255	0.165762	0.434406	1	0.999631	0.779717
Atp2b1_G5E829_S1139s_1	0.59	-0.69	-1.16	0.02	-0.05	-0.89	0.29	-0.14	-0.83	-1.03	-1.24	-1.33	-0.71	-0.73	-1.14	-0.51	0.1125	-0.7975	-0.4625	0.800622	0.0760637	0.286751	1	0.999631	0.705972
Atp2b1_G5E829_S1140s_1	0.59	-0.69	-1.16	0.02	-0.05	-0.89	0.29	-0.14	-0.83	-1.03	-1.24	-1.33	-0.71	-0.73	-1.14	-0.51	0.1125	-0.7975	-0.4625	0.800622	0.0760637	0.286751	1	0.999631	0.705972
Atp2b1_G5E829_S1177s_1	-0.26	-1.4	-0.57	-0.93	-1.8	-1.43	-0.89	-1.28	-1.32	0.19	-1.84	-1.34	-0.92	-1.97	-1.2	-1.54	-0.56	-0.2875	-0.6175	0.126585	0.554716	0.12253	1	0.999631	0.591264
Atp2b1_G5E829_S1178s_1	-1.04	-1.21	0.06	-0.93	-2.49	-1.28	-1.28	-1.24	-1.59	0.16	-1.49	-1.02	-0.46	-1.95	-0.89	-1.04	-0.7925	-0.205	-0.305	0.0815159	0.667234	0.48553	1	0.999631	0.804287
Atp2b1_G5E829_S1178s_2	2.4	-0.27	-0.19	1.09	1.55	0.28	1.32	0.28	0.14	-1.1	-0.54	-0.74	-0.86	-0.87	-0.17	-0.81	0.1	-1.3175	-1.435	0.87566	0.0558483	0.0344193	1	0.999631	0.446273
Atp2b1_G5E829_S1182s_2	2.4	-0.27	-0.19	1.09	1.55	0.28	1.32	0.28	0.14	-1.1	-0.54	-0.74	-0.86	-0.87	-0.17	-0.81	0.1	-1.3175	-1.435	0.87566	0.0558483	0.0344193	1	0.999631	0.446273
Atp2b1_G5E829_S17s_1	-1.35	-1.62	-1.21	-1.97	-1.56	-2.15	-1.31	-1.92	-1.77	-1.22	-1.69	-1.62	-1.16	-2.11	-2.8	-1.83	-0.1975	-0.0375	-0.4375	0.525383	0.89766	0.29104	1	0.999631	0.706164
Atp2b1_G5E829_S338s_1	-1.12	-2.15	-0.74	-1.16	-0.92	-2.37	-0.22	-0.98	-1.33	-3.1	0.17	-0.61	-0.74	-1.56	-0.75	-1.07	0.17	0.075	0.2625	0.737563	0.912077	0.504222	1	0.999631	0.814292
Atp2b2_Q3UHH0_S1100s_1	-0.47	-0.93	-1.28	-0.91	-1.24	-2.18	-1.16	-2.82	-2.19	-1.89	-1.29	-2.52	-0.89	-1.13	-2.76	-1.62	-0.9525	-1.075	-0.7025	0.0463019	0.0112774	0.139809	1	0.999631	0.611718
Atp2b2_Q3UHH0_S1101s_1	-0.47	-0.93	-0.9	-1.25	-1.24	-2.18	-1.29	-1.61	-2.19	-1.89	-0.85	-1.69	-0.89	-1.13	-1.92	-1.44	-0.6925	-0.7675	-0.4575	0.0516066	0.0564188	0.198184	1	0.999631	0.655701
Atp2b2_Q3UHH0_S1111s_1	-0.69	0.68	0.08	0.11	0.21	0.26	-0.61	0.11	0.21	-0.23	-0.48	-0.03	0.87	0.49	-0.25	0.19	-0.0525	-0.1775	0.28	0.886217	0.618247	0.483958	1	0.999631	0.803422
Atp2b2_Q3UHH0_S1114s_1	-0.86	1.78	1.4	0.36	1.19	1.08	0.42	0.96	0.88	-0.42	1.18	1.24	1.72	1.12	0.6	1.05	0.2425	0.05	0.4525	0.66788	0.937503	0.444389	1	0.999631	0.78327
Atp2b2_Q3UHH0_S1151s_1	-0.07	-0.78	-1.18	-0.93	-0.23	0.31	-1.1	-1.95	0.06	0.41	-1.03	-1.2	1	0.51	-1.75	-2.06	-0.0025	0.3	0.165	0.996107	0.513102	0.818316	1	0.999631	0.938303
Atp2b2_Q3UHH0_S1152s_1	-0.16	-0.37	-0.66	-0.99	-0.77	-0.13	-1.11	-1.47	-0.34	-0.5	-0.97	-1.04	0.03	-0.72	-1.44	-0.84	-0.325	-0.1675	-0.1975	0.377875	0.596333	0.610161	1	0.999631	0.859048
Atp2b2_Q3UHH0_S1156s_1	-0.51	-0.62	0.36	-2.46	-0.73	-1.09	-0.18	-0.52	-0.94	-2.78	-0.05	-0.23	-1.1	-2.48	-1.48	-2.49	0.1775	-0.1925	-1.08	0.755099	0.800003	0.107921	1	0.999631	0.569416
Atp2b2_Q3UHH0_S1162s_1	-0.12	-1.13	-1.34	-0.51	1.41	0.46	0.14	0.46	0.07	-1.18	-0.36	0.5	-0.15	-0.24	-1.29	-0.16	1.3925	0.5325	0.315	0.00566131	0.251744	0.451503	1	0.999631	0.788148
Atp2b2_Q3UHH0_S1175s_1	-0.51	-0.56	-0.69	-0.81	-0.41	-0.32	-1.01	-0.74	-0.4	-1.5	-0.87	-0.23	0.88	-0.43	-1.14	-0.53	0.0225	-0.1075	0.3375	0.932918	0.751383	0.445833	1	0.999631	0.784402
Atp2b2_Q3UHH0_S18s_1	-0.68	1.21	0.95	0.64	1.8	1.08	1.04	1.44	0.66	-2.03	0.8	1.4	1.11	0.78	1.36	0.63	0.81	-0.3225	0.44	0.0923377	0.675573	0.33996	1	0.999631	0.73263
Atp2b2_Q3UHH0_S19s_1	0.6	0.34	0.23	-0.04	1.86	1.13	1.15	0.88	0.6	-0.58	0.09	0.7	0.76	0.76	0.54	-0.21	0.9725	-0.08	0.18	0.00964361	0.822673	0.593704	1	0.999631	0.853512
Atp2b2_Q3UHH0_T1113t_1	-0.87	1.94	1.29	0.36	1	1	0.31	0.59	0.97	-0.14	0.8	1.35	1.95	1.27	0.62	1.13	0.045	0.065	0.5625	0.937659	0.916751	0.365463	1	0.999631	0.74565
Atp2b2_S4R1C4_S1107s_1	-1.73	-1.22	-1.35	-1.88	-1.69	-0.82	-1.79	-1.4	-1.39	-1.73	-1.32	-1.85	1.01	-1.1	-1.4	-1.7	0.12	-0.0275	0.7475	0.706382	0.924148	0.218248	1	0.999631	0.669859
Atp2b2_S4R1C4_S1116s_2	-1.42	-0.8	0.7	0.64	-0.91	-0.84	-1.06	-0.49	-0.76	-0.92	0.21	0.21	0.35	0.04	1.29	-0.23	-0.605	-0.095	0.5825	0.250666	0.866045	0.323669	1	0.999631	0.724485
Atp2b2_S4R1C4_S1117s_2	-1.12	-0.89	-0.09	-0.19	-0.85	-0.39	-0.29	-0.54	-0.6	-0.8	-0.53	-1.04	0.74	-0.17	0.06	-1.15	0.055	-0.17	0.4425	0.866176	0.609941	0.348622	1	0.999631	0.736697
Atp2b2_S4R1C4_S1130s_1	-1.85	-0.88	-0.39	-0.75	-1.34	-0.6	-0.85	-2.03	-1.53	-0.67	0.2	-0.48	1.35	-0.36	-0.72	-0.09	-0.2375	0.3475	1.0125	0.586828	0.457443	0.0755791	1	0.999631	0.541044
Atp2b2_S4R1C4_S1130s_2	-0.7	-1.06	-0.09	-0.19	-0.77	0.28	-0.29	-0.54	-0.34	-0.6	-0.53	-1.04	1.32	-0.56	0.06	-1.15	0.18	-0.1175	0.4275	0.608981	0.719317	0.434762	1	0.999631	0.779717
Atp2b2_S4R1C4_S1135s_1	-0.14	0.05	-0.17	0.84	0.26	0.6	0.68	-0.16	-0.15	0.17	1.6	2.02	0.75	1.01	-2.21	0.48	0.2	0.765	-0.1375	0.559574	0.179269	0.843308	1	0.999631	0.94821
Atp2b2_S4R1C4_S1142s_1	-1.72	-0.15	-1.35	-1.61	-1.07	-0.72	-1.49	-0.76	-0.82	-1.24	-1.76	-1.04	-0.02	-0.44	-0.61	-0.68	0.1975	-0.0075	0.77	0.62759	0.985657	0.0839306	1	0.999631	0.549732
Atp2b3_A2ALL9_S1124s_1	-0.63	-0.23	0.02	-0.58	-0.88	-0.47	-0.31	-0.51	-0.31	-0.5	-0.8	-1.17	0.63	0.12	-0.16	-0.05	-0.1875	-0.34	0.49	0.505503	0.28812	0.146366	1	0.999631	0.618217
Atp2b3_A2ALL9_S1126s_1	-0.56	-0.87	0.58	0.1	-1.04	-0.56	-0.56	0.38	-1.04	-0.67	0.6	0.56	-0.23	-0.51	0.84	0.73	-0.2575	0.05	0.395	0.555053	0.920949	0.40298	1	0.999631	0.764348
Atp2b3_Q8C048_S315s_1	-0.85	-3.07	0.57	-0.82	-1.02	-1.14	1.33	-4.45	-0.61	-2.16	-2.27	-0.95	-1.57	-3.36	-2.07	-4.4	-0.2775	-0.455	-1.8075	0.817256	0.553356	0.0569365	1	0.999631	0.496556
Atp2b3_Q8C048_S316s_1	0.98	-2	-1.14	-0.16	-0.36	-1.14	1.76	-1.25	-0.22	-1.85	0.49	-0.58	-1.87	-3.1	-2.96	-3.42	0.3325	0.04	-2.2575	0.688254	0.955459	0.00574552	1	0.999631	0.351545
Atp2b3_Q8C048_S336s_1	-0.74	-0.02	-0.44	0.32	-0.28	0.49	0.45	-0.48	0.3	0.65	0	0.46	0.31	-1.08	-0.02	-2.55	0.265	0.5725	-0.615	0.471581	0.103729	0.333589	1	0.999631	0.728079
Atp2b3_Q8C048_S578s_1	-0.19	1.51	0.73	0.37	1.74	1	0.01	0.33	0.69	0.01	0.54	1.12	1.45	1.5	0.38	1.02	0.165	-0.015	0.4825	0.738185	0.97181	0.290625	1	0.999631	0.706164
Atp2b3_Q8C048_S8s_1	-2.41	-3.73	-0.63	-1.05	-2.15	-3.37	-0.98	-0.68	-3.07	-2.65	-1.02	-1.15	-2.14	-2.99	-1.03	-0.63	0.16	-0.0175	0.2575	0.844116	0.981862	0.73983	1	0.999631	0.908631
Atp2b3_Q8C048_T1079t_1	-2.11	-0.71	-1.43	-1.15	-0.8	-1.19	-1.02	-0.99	-0.82	-1.25	-0.78	-0.81	-0.04	-0.61	-0.6	-1.45	0.35	0.435	0.675	0.316315	0.235258	0.135231	1	0.999631	0.607096
Atp2b4_E9Q828_S1065s_1	0.16	-1.46	-0.94	-0.94	-1.17	-0.67	-0.65	-1.21	-0.42	0.41	-1.43	-1.59	-0.69	-2	-1.49	-2.19	-0.13	0.0375	-0.7975	0.736255	0.944464	0.113284	1	0.999631	0.577428
Atp2b4_E9Q828_S329s_1	-1.33	-0.52	-0.25	-1.22	-0.18	-0.94	-0.13	-0.64	-0.32	-1.41	-0.25	0.43	0.56	-1.08	-0.66	-0.66	0.3575	0.4425	0.37	0.325787	0.341059	0.412536	1	0.999631	0.768114
Atp2c1_Q3UZR5_S944s_1	-0.53	-1.56	-1.49	-0.02	-0.94	-1.14	-0.66	0.92	-1.5	0.23	-1.92	-0.43	0.47	0.02	-0.99	-0.35	0.445	-0.005	0.6875	0.4275	0.992985	0.169558	1	0.999631	0.639508
Atp6v1a_P50516_S384s_1	-0.76	-0.19	-0.73	-1.07	-1.11	-0.67	-1.08	-0.68	-0.25	-0.51	-1.09	-0.69	0.09	0	-0.77	-0.16	-0.1975	0.0525	0.4775	0.501927	0.868228	0.176135	1	0.999631	0.642116
Atp6v1a_P50516_S568s_1	-0.95	-0.27	-0.58	-0.76	-0.55	-0.79	-0.9	-0.33	-0.9	-0.25	-0.92	-0.8	0	0.04	-0.6	-0.49	-0.0025	-0.0775	0.3775	0.992794	0.793104	0.243228	1	0.999631	0.685637
Atp6v1b2_P62814_S498s_1	-0.65	-0.47	0.09	-0.42	-0.25	-0.4	-0.82	-0.79	-1.05	-0.14	-0.77	-1.26	-0.13	-0.21	-0.68	-0.16	-0.2025	-0.4425	0.0675	0.486541	0.210184	0.824828	1	0.999631	0.940061
Atp6v1e1_P50518_T195t_1	0.7	-0.01	0.27	-0.06	-0.19	0.3	0.42	0.27	0.11	0.89	0.79	1.39	0.31	0.62	1.13	0.61	-0.025	0.57	0.4425	0.931438	0.130782	0.191997	1	0.999631	0.648674
Atp6v1g2_Q9WTT4_S65s_1	-0.52	0.18	-1.57	-1.38	-0.44	-0.23	-0.61	-1.1	-0.71	-1.11	-1.25	-1.95	-0.18	0.27	-0.24	-0.95	0.2275	-0.4325	0.5475	0.603551	0.363993	0.2588	1	0.999631	0.692624
Atp6v1h_Q8BVE3_S483s_1	0.14	-2.31	-3.8	-3.66	-2.2	-2.84	-3.37	-3.88	-2.58	-1.22	-2.17	-3.28	-3.36	-2.57	-3.71	-5.12	-0.665	0.095	-1.2825	0.442928	0.913893	0.180417	1	0.999631	0.64376
Atp6v1h_Q8BVE3_S58s_1	-0.17	-1.36	-1.6	-1.01	-0.67	-1.19	-1.35	-1.02	-0.4	-0.59	-1.33	-0.89	0.8	-0.41	0.21	-1.71	-0.0225	0.2325	0.7575	0.950905	0.554632	0.20607	1	0.999631	0.6605
Atp6v1h_Q8BVE3_S59s_1	-0.17	-1.36	-1.47	-1.02	-0.67	-1.19	-1.42	-0.91	-0.4	-0.59	-1.16	-0.9	0.8	-0.41	0.38	-1.78	-0.0425	0.2425	0.7525	0.90605	0.514401	0.218239	1	0.999631	0.669859
Atp7a_Q64430_S356s_1	-0.5	-0.47	-0.19	-0.4	-0.63	-1.53	-0.68	-0.02	-1.67	-0.41	0.15	-1.28	1.4	-0.46	-2.23	-0.08	-0.325	-0.4125	0.0475	0.36196	0.339923	0.943369	1	0.999631	0.981629
Atp8a1_P70704_S1109s_1	-0.47	-0.87	1.82	-1.72	-1.05	-0.75	-0.26	1.58	-1.18	-1.42	1.3	1.45	-0.78	-0.68	2.44	2	0.19	0.3475	1.055	0.819992	0.711963	0.295471	1	0.999631	0.708945
Atp8a1_P70704_S1111s_1	-0.7	-0.73	-0.51	-1.02	-0.27	-1.1	-0.94	-0.75	-0.9	-0.99	-1.28	-0.59	-1.27	-0.81	-0.65	-0.67	-0.025	-0.2	-0.11	0.930027	0.476887	0.708685	1	0.999631	0.898927
Atp8a1_P70704_S29s_1	-0.65	-0.62	-4.09	-2.5	-0.75	-0.76	-1.61	-2.27	0.31	0.54	0.3	-2.27	0.82	-0.35	-2.18	-3.1	0.6175	1.685	0.7625	0.445175	0.0937789	0.468094	1	0.999631	0.795565
Atp8a1_P70704_T28t_1	0.31	1.05	0.22	-0.21	1.05	0.99	0.35	-0.06	2.06	2.59	0.6	1.24	2.73	1.1	0.73	1.17	0.24	1.28	1.09	0.53683	0.0245323	0.0488727	1	0.999631	0.48544
Atp8a2_P98200_S421s_1	0.11	0.07	-0.3	-0.35	-0.39	0.37	-0.25	-0.4	0.27	0.94	-0.11	-0.23	-0.01	-0.1	-0.23	-0.93	-0.05	0.335	-0.2	0.863191	0.333038	0.53898	1	0.999631	0.830899
Atp8a2_P98200_S422s_1	-0.3	-1.14	-0.3	-0.35	-1.21	-0.52	-0.25	-0.4	-0.4	0.24	-0.11	-0.23	-0.06	-0.71	-0.23	-0.93	-0.0725	0.3975	0.04	0.828482	0.22257	0.908467	1	0.999631	0.969941
Atp8a2_P98200_S435s_1	0.99	0.12	1.09	0.15	-0.31	0.05	0.59	-0.03	0.23	0.26	0.2	0.57	0.54	0.25	0.09	-0.33	-0.5125	-0.2725	-0.45	0.167209	0.415943	0.2358	1	0.999631	0.683301
Atp8a2_P98200_S6s_1	-0.45	-0.98	-1.64	-1.53	-0.38	-0.87	-1.2	-1.6	-0.62	-1.02	-1.35	-0.43	-0.38	-0.64	-0.4	-0.44	0.1375	0.295	0.685	0.723093	0.433523	0.0692964	1	0.999631	0.525113
Atp8a2_P98200_T1108t_1	-0.43	-0.99	-1.11	-0.31	0.19	-0.57	-0.41	-1.05	-0.15	-0.47	-0.92	-0.64	0.38	-0.51	-0.77	-0.25	0.25	0.165	0.4225	0.483747	0.60595	0.262235	1	0.999631	0.69292
Atrx_Q61687_S1290s_1	-0.38	-0.57	0.58	-0.28	-0.42	-0.43	-0.33	-0.18	-0.27	0.76	-0.14	0.04	0.4	-0.06	0.52	0.37	-0.1775	0.26	0.47	0.574658	0.48841	0.194105	1	0.999631	0.651261
Atrx_Q61687_S315s_1	-3.27	-1.73	-2.48	-2.34	-0.35	-3.11	-0.75	-1.86	0.72	-3.39	-1.08	-0.52	1.54	-1.99	-1.31	-2.96	0.9375	1.3875	1.275	0.156815	0.109663	0.169214	1	0.999631	0.638979
Atrx_Q61687_S590s_1	-1.14	-0.96	-1.1	-1.82	-1.12	-1.16	-1.33	-1.64	-1.09	-1.41	-1.36	-0.53	-0.49	-0.85	-1.26	-0.4	-0.0575	0.1575	0.505	0.844938	0.635689	0.159671	1	0.999631	0.629764
Atrx_Q61687_S665s_1	0.82	0.66	0.06	-0.96	-0.01	-0.49	-0.67	-0.98	0.11	0.71	-1.43	-0.91	0.73	0.75	-0.89	-0.85	-0.6825	-0.525	-0.21	0.144283	0.374186	0.712311	1	0.999631	0.9008
Atrx_Q61687_S801s_1	0.28	1.35	0.19	-0.46	0.62	1.22	-0.76	-0.97	0.57	0.74	-0.04	0.95	1.55	1.6	0.63	0.21	-0.3125	0.215	0.6575	0.598503	0.619526	0.200561	1	0.999631	0.658263
Atrx_Q61687_S912s_1	0.67	-0.92	1.2	0.88	-1.35	-1.22	1.06	-0.26	-0.38	0.43	0.03	-0.2	-0.89	-1.87	0.3	-0.72	-0.9	-0.4875	-1.2525	0.188729	0.325458	0.0568884	1	0.999631	0.496556
Atxn1_J3QPR1_S213s_1	-0.12	0.4	0.37	0.81	-0.1	0.41	-0.1	0.74	-0.08	0.15	0.45	0.16	0.71	1.14	0.06	0.7	-0.1275	-0.195	0.2875	0.695965	0.517081	0.419589	1	0.999631	0.772152
Atxn1_J3QPR1_S759s_1	0.95	2.46	2.08	1.42	1.64	1.59	0.9	1.84	1.9	1.77	2.09	2.04	1.7	2.43	1.87	2.13	-0.235	0.2225	0.305	0.559229	0.552638	0.450272	1	0.999631	0.787533
Atxn1_J3QPR1_S81s_1	-0.72	0.59	0.45	0.44	0.2	0.51	-0.05	0.23	0.42	0.31	-0.03	0.31	0.46	0.69	0.52	1.09	0.0325	0.0625	0.5	0.926685	0.860663	0.20332	1	0.999631	0.659781
Atxn1l_P0C7T6_T328t_1	0.38	0.65	0.91	0.65	-0.03	0.11	0.71	0.84	0.79	0.76	0.96	0.84	0.53	0.79	0.98	1.43	-0.24	0.19	0.285	0.435148	0.461442	0.370102	1	0.999631	0.746338
Atxn2_F6U2C2_S190s_1	1.82	0.01	-0.29	0.86	-0.24	0.13	1.71	0.76	-1.99	-0.02	0.62	-0.4	-1.69	-1.52	-0.44	0	-0.01	-1.0475	-1.5125	0.98622	0.134689	0.0239691	1	0.999631	0.415644
Atxn2_F6U2C2_S276s_1	0.76	1.19	0.49	2.08	1.42	1.49	2.05	1	1.87	1.2	1.32	0.75	-2.15	1.13	0.78	0.08	0.36	0.155	-1.17	0.38924	0.713249	0.127797	1	0.999631	0.598337
Atxn2_F6U2C2_S356s_1	-1.45	-0.94	0.8	1.83	-0.79	-0.38	0.63	1.34	-0.99	-1.52	1.53	0.94	-0.46	-1.06	1.34	1.33	0.14	-0.07	0.2275	0.859075	0.939292	0.788993	1	0.999631	0.925513
Atxn2_F6U2C2_S388s_1	-0.1	0.29	-0.35	0.32	0.96	0.5	-0.06	0.46	0.38	-1.53	0.49	0.27	0.77	0.09	0.81	0.41	0.425	-0.1375	0.48	0.198358	0.776839	0.154611	1	0.999631	0.625677
Atxn2_F6U2C2_S403s_1	1.27	-0.12	0.15	1.14	1.11	0.56	1.44	0.77	0.45	-0.38	1.8	1.26	-0.95	0.29	-0.23	0.87	0.36	0.1725	-0.615	0.380966	0.753315	0.236084	1	0.999631	0.683301
Atxn2_F6U2C2_S444s_1	1.42	0.84	0.33	0.53	0.05	0.69	0.62	0.34	0.8	1.5	0.9	0.96	0.03	1.04	1.13	0.62	-0.355	0.26	-0.075	0.288792	0.443949	0.844087	1	0.999631	0.948381
Atxn2_F6U2C2_S519s_1	-0.5	0.18	-0.04	-0.23	0.36	0.47	0.56	0.35	0.51	-0.61	0.97	0.8	-0.2	0.77	1.16	0.78	0.5825	0.565	0.775	0.0457049	0.177229	0.0576361	1	0.999631	0.497148
Atxn2_F6U2C2_S551s_1	0.41	1.71	1.27	0.6	-0.1	1.32	0.9	0.97	0.74	1.52	0.89	0.91	1.57	1.53	1.54	0.88	-0.225	0.0175	0.3825	0.597354	0.962526	0.32704	1	0.999631	0.724678
Atxn2_F6U2C2_T240t_1	2.15	1.44	0.54	1.54	1.83	3.35	1.5	2.1	1.4	1.36	1.85	-0.42	-1.22	2.01	0.71	1.84	0.7775	-0.37	-0.5825	0.138361	0.510777	0.42576	1	0.999631	0.774624
Atxn2_F6U2C2_T326t_1	-0.66	0.74	-0.61	0.21	0.09	0.3	-0.25	0.91	0.75	-0.08	0.03	0.73	0.34	0.76	0.36	0.61	0.3425	0.4375	0.5975	0.417621	0.302564	0.144673	1	0.999631	0.616037
Atxn2_F6U2C2_T401t_1	1.27	-0.12	0.15	1.14	1.11	0.56	1.44	0.77	0.45	-0.38	1.8	1.26	-0.95	0.29	-0.23	0.87	0.36	0.1725	-0.615	0.380966	0.753315	0.236084	1	0.999631	0.683301
Atxn2_F6U2C2_T431t_1	0.63	1.02	0.11	0.14	0.78	0.92	0.25	0.83	0.47	1	0.74	1.13	-0.06	1.26	-0.64	1.17	0.22	0.36	-0.0425	0.491468	0.277846	0.93155	1	0.999631	0.978006
Atxn2_F6U2C2_T521t_1	-0.84	0.02	0.45	0.29	-1.1	-0.51	0.16	0.21	0.49	0.16	0.19	1.57	0.71	0.4	1.24	1.06	-0.29	0.6225	0.8725	0.494446	0.175281	0.0413124	1	0.999631	0.474979
Atxn2l_Q7TQH0_S109s_1	-0.06	1.02	-0.02	0.08	0.57	-0.01	-0.15	-0.36	0.08	-0.21	0.09	-0.34	-0.04	0.5	0.59	0.87	-0.2425	-0.35	0.225	0.497115	0.303734	0.542097	1	0.999631	0.83268
Atxn2l_Q7TQH0_S304s_1	1.79	0.58	0.93	0.9	1.23	1.52	0.79	1.28	1.44	2.46	1.14	1.37	-0.36	2.09	1.68	0.89	0.155	0.5525	0.025	0.6475	0.191201	0.964058	1	0.999631	0.987331
Atxn2l_Q7TQH0_S337s_1	0.87	1.95	1.47	0.32	1.51	1.61	2.07	-0.1	1.66	1.16	0.77	1.07	0.52	1.64	0.83	0.6	0.12	0.0125	-0.255	0.825517	0.975566	0.566092	1	0.999631	0.841733
Atxn2l_Q7TQH0_S388s_1	1.11	0.54	1.22	1	0.36	1.9	1.16	0.68	0.62	0.89	0.99	1.17	-2.05	2.13	1.47	1.39	0.0575	-0.05	-0.2325	0.879729	0.859579	0.779427	1	0.999631	0.921416
Atxn2l_Q7TQH0_S591s_1	-0.97	0.24	0.61	0.28	0.12	-0.09	0	0.32	0.24	-0.41	0.5	0.69	0.62	-0.01	0.56	0.63	0.0475	0.215	0.41	0.898957	0.614095	0.321238	1	0.999631	0.72408
Atxn2l_Q7TQH0_S631s_1	0.09	1.57	1.39	0.74	0.46	0.73	0.31	0.82	1.03	0.8	1.28	1.6	1.41	1.07	0.83	1.53	-0.3675	0.23	0.2625	0.337748	0.56234	0.51441	1	0.999631	0.819052
Atxn2l_Q7TQH0_S681s_1	0.98	0.56	0.73	0.3	0.98	0.26	0.72	0.23	1.43	1.06	0.59	0.82	0.12	-0.25	0.64	0.85	-0.095	0.3325	-0.3025	0.749826	0.287961	0.392792	1	0.999631	0.758901
Atxn7l2_B7ZCC4_S514s_1	0.34	1.23	0.57	0.46	0.37	0.75	-0.37	-0.8	0.85	0.83	0.23	0.83	0.84	1.12	0.6	0.7	-0.6625	0.035	0.165	0.12659	0.911286	0.604146	1	0.999631	0.85817
Aurkaip1_Q9DCJ7_S51s_1	0.75	2.44	1.52	1.42	1.42	1.54	0.98	1.85	2.12	1.88	2.2	1.9	0.84	2.42	1.35	1.95	-0.085	0.4925	0.1075	0.830548	0.213971	0.821749	1	0.999631	0.938464
Avl9_Q80U56_S368s_1	-0.24	-0.03	-0.58	-0.32	-0.08	-0.09	-0.91	-0.11	-0.24	-0.53	-0.01	0.18	-0.06	-0.34	-0.26	-0.26	-0.005	0.1425	0.0625	0.986614	0.617614	0.820397	1	0.999631	0.938379
Axin1_F6XWC2_S445s_1	2.02	-0.19	1.37	0.71	-1.06	0.38	2.26	0.3	-1.02	0.98	0.3	-0.36	-0.54	-0.9	0.29	0.01	-0.5075	-1.0025	-1.2625	0.492771	0.111375	0.0319973	1	0.999631	0.442395
Axin2_O88566_S454s_1	1.74	0.33	0.35	1.22	1.37	1.49	1.16	0.93	1.14	0.89	0.18	0.14	-0.31	0.05	-0.66	0.61	0.3275	-0.3225	-0.9875	0.398589	0.458065	0.0463454	1	0.999631	0.479949
B630019K06Rik_Q7TNS5_S41s_1	-0.47	-2.73	-0.44	-0.81	-2.14	-1.82	-0.77	-0.94	-2.39	-1.01	-0.84	-1.22	-1.61	-2.32	-0.47	-1.11	-0.305	-0.2525	-0.265	0.60199	0.671151	0.665292	1	0.999631	0.882566
B630019K06Rik_Q7TNS5_S42s_1	0.16	-0.77	-0.16	-1.03	-0.78	-0.64	-0.41	-0.96	-0.54	0.17	-1.24	-0.7	0.31	-1.12	0.31	-1.74	-0.2475	-0.1275	-0.11	0.466437	0.754948	0.840351	1	0.999631	0.946678
B630019K06Rik_Q7TNS5_S97s_1	-0.68	-0.82	-0.26	0.32	0.2	0.23	0.02	1.34	0.45	-1.27	1.18	0.64	0.56	0.53	0.97	0.04	0.8075	0.61	0.885	0.0671358	0.279957	0.0334037	1	0.999631	0.44294
Babam1_Q3UI43_S48s_1	1.2	0.25	-0.48	0.88	1.12	1.12	0.65	0.71	0.79	0.83	0.25	0.17	0.85	0.76	0.52	1.08	0.4375	0.0475	0.34	0.286697	0.908896	0.413415	1	0.999631	0.768474
Bad_Q3U9H3_S128s_1	0.21	-0.07	0.67	0.3	-0.3	0.48	0.87	0.12	0.69	1.32	0.27	-0.48	-0.08	-0.44	0.48	-0.93	0.015	0.1725	-0.52	0.964	0.677887	0.185733	1	0.999631	0.646224
Bad_Q3U9H3_S94s_1	-0.18	0.42	0.53	0.03	0.43	0.22	-0.08	0.7	0.47	0.15	0.44	-0.1	0.94	1.03	0.05	0.37	0.1175	0.04	0.3975	0.694785	0.892038	0.267573	1	0.999631	0.695976
Bag2_Q91YN9_S20s_1	0.84	1.33	-0.27	0.77	0.09	1.29	2.8	-0.56	0.75	1.9	0.11	-0.22	0.05	0.37	0.31	-0.36	0.2375	-0.0325	-0.575	0.740802	0.95166	0.172043	1	0.999631	0.641657
Bag3_Q9JLV1_S179s_1	-1.16	-0.12	0.69	-0.06	0.17	-0.24	-0.12	0.17	0.2	-0.17	-0.91	0.88	-1.78	1.12	0.82	0.79	0.1575	0.1625	0.4	0.693986	0.747739	0.565211	1	0.999631	0.84139
Bag3_Q9JLV1_S297s_1	1	-0.24	0.37	0.23	0.52	0.24	0.03	0.31	0.43	1.25	-0.3	-0.11	-1.18	0.93	0.45	0.05	-0.065	-0.0225	-0.2775	0.839977	0.958268	0.580045	1	0.999631	0.846727
Bag3_Q9JLV1_S390s_1	-0.47	-0.16	-0.33	-0.42	-0.09	0.03	-0.49	-0.22	-0.15	-0.45	-0.02	0.29	0.85	0.31	-0.27	-0.68	0.1525	0.2625	0.3975	0.546784	0.348843	0.307571	1	0.999631	0.717856
Bag4_Q8CI61_S175s_1	1.89	0.48	0.18	1.47	0.92	-0.28	0.72	0.9	0.39	0.7	0.53	0.27	-0.06	0.48	-0.45	0.47	-0.44	-0.5325	-0.895	0.361369	0.22264	0.0743408	1	0.999631	0.539897
Bag4_Q8CI61_S175s_2	1.52	1.77	1.48	2.15	1.7	0.64	1.45	2.51	1.54	0.92	1.88	1.93	-0.86	1.46	2.51	1.07	-0.155	-0.1625	-0.685	0.708542	0.62528	0.303961	1	0.999631	0.715879
Bag4_Q8CI61_S179s_2	1.52	1.77	1.48	2.15	1.7	0.64	1.45	2.51	1.54	0.92	1.88	1.93	-0.86	1.46	2.51	1.07	-0.155	-0.1625	-0.685	0.708542	0.62528	0.303961	1	0.999631	0.715879
Bag6_Q3UF95_S1085s_1	-0.53	-1.58	-0.2	-0.47	-0.76	-0.96	-0.92	-0.73	-0.76	-0.57	-1.43	-0.31	-0.16	-0.02	-0.13	-0.37	-0.1475	-0.0725	0.525	0.668156	0.855926	0.168136	1	0.999631	0.637399
Bag6_Q3UF95_S968s_2	-2.67	-5.99	-4.48	-4.74	-4.88	-4.91	-5.19	-4.03	-5.94	-3.8	-3.97	-2.38	-3.76	-5.17	-4.46	-3.13	-0.2825	0.4475	0.34	0.665655	0.610646	0.638072	1	0.999631	0.87033
Bag6_Q3UF95_S977s_1	0.22	0.87	0.55	0.3	0.55	0.33	0.18	0.38	0.32	0.31	0.8	0.92	0.72	0.5	0.52	0.78	-0.125	0.1025	0.145	0.638181	0.729959	0.61562	1	0.999631	0.861203
Bag6_Q3UF95_S977s_2	-2.67	-5.99	-4.48	-4.74	-4.88	-4.91	-5.19	-4.03	-5.94	-3.8	-3.97	-2.38	-3.76	-5.17	-4.46	-3.13	-0.2825	0.4475	0.34	0.665655	0.610646	0.638072	1	0.999631	0.87033
Bag6_Q3UF95_T967t_1	1.59	-1.32	1.05	0.68	-1.71	-1.43	1.6	-0.22	-1.17	0.79	0.15	-0.12	-1.4	-0.95	-0.12	-0.45	-0.94	-0.5875	-1.23	0.287276	0.39382	0.0735931	1	0.999631	0.539296
Bai3_Q80ZF8_S1220s_1	-0.49	0.38	1.68	1.61	0.16	-0.15	1.42	1.66	-0.13	-0.18	1.7	2.19	0.63	0.07	2.12	2.29	-0.0225	0.1	0.4825	0.971014	0.888883	0.480693	1	0.999631	0.801848
Bai3_Q80ZF8_S1411s_1	-1.35	-1.02	0.1	-1	-1.32	-1.26	-1.13	-0.19	-1.69	-1.37	-0.06	0.19	-0.49	-1.04	-0.01	-0.16	-0.1575	0.085	0.3925	0.702938	0.87212	0.348905	1	0.999631	0.736697
Bai3_Q80ZF8_S751s_1	-1.18	-0.2	-0.17	-0.2	-0.85	-0.59	-0.73	-0.62	-0.26	-0.98	0.1	-0.12	1.06	0.04	-1.84	-0.08	-0.26	0.1225	0.2325	0.410228	0.740327	0.696687	1	0.999631	0.895731
Bai3_Q80ZF8_T1215t_1	1.41	1.24	-0.14	1.57	1.37	1.49	1.98	1.3	0.03	-0.31	1.88	-1.1	-1.86	0.64	-0.83	0.11	0.515	-0.895	-1.505	0.236591	0.200038	0.0318495	1	0.999631	0.442395
Baiap2_Q8BKX1_S324s_1	-0.16	-3.64	-0.97	-0.93	-1.25	-1.49	-1.02	-0.76	-1	-0.48	-1.58	-0.65	-1.52	-1.28	-0.76	-0.85	0.295	0.4975	0.3225	0.669895	0.489411	0.644091	1	0.999631	0.872436
Baiap2_Q8BKX1_S326s_1	-0.41	-0.67	-0.44	-1.11	-0.8	-0.64	-0.96	-0.79	-1.08	-0.14	-0.29	-0.25	0.3	-0.5	-0.76	-0.51	-0.14	0.2175	0.29	0.604562	0.508661	0.407489	1	0.999631	0.766996
Baiap2_Q8BKX1_S367s_1	1.96	1.29	-0.71	2.33	2.45	2.03	2.1	2.49	1.75	0.37	2.03	-0.39	-1.61	1.94	0.16	0.54	1.05	-0.2775	-0.96	0.114467	0.722945	0.280906	1	0.999631	0.701922
Baiap2_Q8BKX1_S396s_1	-0.32	0.66	-0.33	-0.06	-0.33	0.18	-0.02	0.54	-0.22	0.09	-0.65	0.73	-0.02	0.53	-0.56	0.58	0.105	1.96262e-17	0.145	0.753924	1	0.708681	1	1	0.898927
Baiap2_Q8BKX1_S515s_1	-0.21	0.75	0.68	0.5	2.32	0.86	0.73	1.09	1.2	-1.12	1.75	1.56	0.8	0.72	1.28	0.23	0.82	0.4175	0.3275	0.0758089	0.51436	0.371199	1	0.999631	0.746338
Baiap2_Q8BKX1_T341t_1	0.12	1.81	-0.82	0.84	2	2.17	1.03	1.34	1.89	-0.28	1.04	-0.2	-1.15	1.16	0.17	0.33	1.1475	0.125	-0.36	0.0659611	0.854542	0.586574	1	0.999631	0.849724
Baiap2_Q8BKX1_T521t_1	-0.54	-0.13	-0.55	-0.98	-0.21	-0.38	-0.71	-0.54	-0.42	-0.45	-0.75	-0.58	0.24	-0.2	-0.49	-0.55	0.09	1.96262e-17	0.3	0.750658	1	0.369319	1	1	0.746224
Baiap2l2_Q80Y61_S459s_1	1.74	1.1	-1.99	-1.12	2.59	1.51	-1.12	-1.69	1.75	1.82	-2.54	-1.08	3.22	1.7	-1.59	-1.06	0.39	0.055	0.635	0.737282	0.963296	0.60564	1	0.999631	0.85817
Baiap3_S4R1K2_S215s_1	0.99	1.24	3	1.36	0.4	1.19	1.97	1.31	1.99	1.64	2.45	2.72	1.3	0.95	2.41	2.68	-0.43	0.5525	0.1875	0.416416	0.277704	0.743559	1	0.999631	0.90976
Basp1_Q91XV3_S128s_1	0.01	-0.14	0.47	0.12	0.45	-0.03	-0.43	0.42	-1.08	0.2	0.4	0.75	-0.69	0.76	0.43	0.64	-0.0125	-0.0475	0.17	0.967272	0.910358	0.662663	1	0.999631	0.881311
Basp1_Q91XV3_S128s_2	-0.71	-0.65	-0.34	-0.39	-0.83	-0.4	-0.97	-0.84	-0.56	-0.33	-1.07	-0.66	-0.27	-0.43	-0.49	0	-0.2375	-0.1325	0.225	0.371642	0.636479	0.429401	1	0.999631	0.776658
Basp1_Q91XV3_S131s_1	-0.5	-0.72	-0.53	-0.21	-1.13	-1.11	-0.32	-0.7	-1.09	-0.67	0.04	-0.65	-0.13	-0.74	-0.51	0.53	-0.325	-0.1025	0.2775	0.279193	0.747603	0.438336	1	0.999631	0.781942
Basp1_Q91XV3_S131s_2	-0.71	-0.65	-0.15	-0.05	-0.83	-0.4	-0.48	-0.2	-0.56	-0.33	-0.66	0.01	-0.27	-0.43	-0.17	0.27	-0.0875	0.005	0.24	0.761562	0.986726	0.452578	1	0.999631	0.788364
Basp1_Q91XV3_S167s_1	-0.59	-0.84	-0.7	-0.23	-0.81	-1.08	-0.59	-0.21	-1.31	-1.01	-0.62	-0.42	-0.34	-0.81	-0.78	0.15	-0.0825	-0.25	0.145	0.779145	0.424411	0.664038	1	0.999631	0.881993
Basp1_Q91XV3_S169s_2	-0.83	-1.08	-0.54	-0.49	-0.73	-1.08	-0.25	-1.16	-1.22	-0.92	-0.23	-0.3	0.42	-0.43	-0.54	0.09	-0.07	0.0675	0.62	0.819448	0.837824	0.0874669	1	0.999631	0.553616
Basp1_Q91XV3_S191s_1	-0.67	-1.02	0.95	-0.21	-1.59	-1.71	-0.29	-1.81	-1.11	-1.6	-0.13	-0.46	-4.02	-1.32	-0.17	0.29	-1.1125	-0.5875	-1.0675	0.0544572	0.266325	0.257758	1	0.999631	0.692624
Basp1_Q91XV3_S218s_1	-1.12	-1.79	-1.84	-1.41	-1.32	-2.05	-1.74	-1.77	-1.87	-1.85	-1.46	-1.96	-0.53	-1.49	-1.44	-1.54	-0.18	-0.245	0.29	0.545018	0.406321	0.417064	1	0.999631	0.771432
Basp1_Q91XV3_S40s_1	-0.33	0.76	1.47	-0.28	-0.18	0.4	-0.06	1.15	-1.11	-0.13	-0.21	-0.73	-0.1	-0.24	0.89	0.48	-0.0775	-0.95	-0.1475	0.876	0.0693248	0.763648	1	0.999631	0.915694
Basp1_Q91XV3_S40s_2	-1.37	1.23	-1.8	-2.1	1.14	0.86	-1.6	-1.86	1.17	-0.51	-1.23	-1.61	1.49	0.43	-1.2	-1.24	0.645	0.465	0.88	0.501433	0.589176	0.326696	1	0.999631	0.724678
Basp1_Q91XV3_S92s_1	-0.4	0.92	0.55	0.05	0.28	0.65	-0.36	0.7	0.49	0.24	0.17	0.61	1.17	0.8	0.41	0.99	0.0375	0.0975	0.5625	0.922924	0.779198	0.153649	1	0.999631	0.625198
Basp1_Q91XV3_T132t_1	-0.49	-0.28	-0.69	0.04	-0.05	-0.83	-1.26	-0.23	-0.61	-1.17	-0.1	-0.86	0.27	-1.17	0.57	0.14	-0.2375	-0.33	0.3075	0.501157	0.3278	0.476097	1	0.999631	0.799882
Basp1_Q91XV3_T132t_2	-0.82	0.58	-0.29	-0.52	1.03	0.3	-1.08	-1.04	0.71	-0.14	-1.1	-0.77	1	0.48	-0.51	-0.08	0.065	-0.0625	0.485	0.906055	0.896246	0.29206	1	0.999631	0.706164
Basp1_Q91XV3_T183t_1	0.21	0.85	2.37	1.66	0.22	0.9	1.54	1.79	0.5	0.44	1.82	1.61	0.31	0.44	1.75	1.62	-0.16	-0.18	-0.2425	0.767843	0.744214	0.666563	1	0.999631	0.88264
Basp1_Q91XV3_T31t_1	-0.33	-3.27	0.11	-0.2	-2.24	-2.35	0.2	-1.03	-2.67	-1.7	-1.19	-0.85	-1.68	-3.59	-0.71	-1.98	-0.4325	-0.68	-1.0675	0.616887	0.390888	0.23106	1	0.999631	0.681463
Basp1_Q91XV3_T31t_2	1.07	-0.85	-0.49	-1.05	-0.97	-0.16	0.04	-1.64	-0.86	0.67	-1.57	-1.76	-0.68	-1.27	-1.87	-2.12	-0.3525	-0.55	-1.155	0.535846	0.411444	0.054922	1	0.999631	0.492066
Basp1_Q91XV3_T36t_1	0.5	-1.6	-0.53	-0.96	-1.78	-0.73	-0.29	-1.41	-1.25	0.08	-1.12	-1.35	-0.98	-2.12	-1.27	-1.75	-0.405	-0.2625	-0.8825	0.439387	0.615506	0.0962095	1	0.999631	0.55886
Basp1_Q91XV3_T36t_2	0.5	0.05	-0.9	-1.39	-0.04	0.25	-0.41	-1.71	0.02	0.3	-1.45	-1.71	0.27	-0.56	-1.61	-1.78	-0.0425	-0.275	-0.485	0.939356	0.651864	0.419514	1	0.999631	0.772152
Baz1b_Q9Z277_S1464s_1	-1.37	-1.64	-0.57	-1.95	-1.56	-1.72	-1.02	-1.76	-1.07	-2.04	-0.78	-2.25	0.7	-1.5	-2.06	-1.84	-0.1325	-0.1525	0.2075	0.716111	0.738039	0.743253	1	0.999631	0.90972
Baz1b_Q9Z277_S1464s_2	-1.08	0.4	-0.96	-0.8	-0.19	-0.85	-0.64	-1.42	-0.56	-0.59	-0.69	-1.05	-0.55	-1.08	-1.5	-0.9	-0.165	-0.1125	-0.3975	0.696511	0.768274	0.346459	1	0.999631	0.735175
Baz1b_Q9Z277_S1468s_2	-1.08	0.4	-0.96	-0.8	-0.19	-0.85	-0.64	-1.42	-0.56	-0.59	-0.69	-1.05	-0.55	-1.08	-1.5	-0.9	-0.165	-0.1125	-0.3975	0.696511	0.768274	0.346459	1	0.999631	0.735175
BC023829_Q3TYW3_S305s_1	-0.44	-1.23	-0.81	-0.76	-1.03	-0.42	-1.05	-0.87	-0.85	0.08	-0.64	-0.58	0.47	-0.09	-0.56	-0.44	-0.0325	0.3125	0.655	0.910768	0.33939	0.0808502	1	0.999631	0.545579
Bcam_Q9R069_S615s_1	1.19	2.09	-0.9	0.7	1.31	1.04	0.17	-0.54	0.84	2.2	0.78	0.18	2.09	0.69	0.18	0.12	-0.275	0.23	-5.1028e-16	0.683437	0.735012	1	1	0.999631	1
Bcan_Q61361_S29s_1	2	0.8	0.9	1.45	-0.47	1.64	3.84	-1.49	-0.91	2.91	0.23	2.1	0.88	0.2	1.95	2.15	-0.4075	-0.205	0.0075	0.696869	0.798174	0.988261	1	0.999631	0.995409
Bcan_Q61361_S587s_1	-0.15	0.22	0.7	0.6	0.02	0.39	0.96	0	-0.19	0.19	1.1	1.98	0.28	0.39	1.03	1.19	3.92523e-17	0.4275	0.38	1	0.399085	0.296686	1	0.999631	0.7098
Bcar1_Q61140_S572s_1	-0.85	0.35	-0.54	-0.75	-0.47	-0.89	-1.3	-0.72	-1.94	-0.13	-0.69	-0.64	-0.83	-0.49	0.04	0.4	-0.3975	-0.4025	0.2275	0.275413	0.390954	0.579217	1	0.999631	0.846484
Bcar1_Q61140_S643s_1	-0.34	-2.19	-0.4	-0.37	-0.61	-0.79	-0.96	-0.77	-0.72	-0.44	-1.56	-0.46	-0.58	0.1	-0.15	-0.56	0.0425	0.03	0.5275	0.924091	0.952012	0.280381	1	0.999631	0.701922
Bcar3_Q9QZK2_S164s_1	-0.55	-0.45	-0.68	-0.24	-0.45	-0.95	-0.43	-0.53	-0.27	-0.24	-0.91	-0.22	-0.35	-0.37	-1.6	0.2	-0.11	0.07	-0.05	0.672834	0.80537	0.902928	1	0.999631	0.968183
Bcar3_Q9QZK2_S245s_1	-0.62	0.5	0.21	-0.43	-0.03	-0.42	-0.2	0.41	0.44	-0.08	0.8	-0.22	1.08	-0.15	0.57	1.14	0.025	0.32	0.745	0.942626	0.405506	0.0966718	1	0.999631	0.55886
Bcar3_Q9QZK2_S250s_1	0.57	1.1	-1.05	0.14	0.47	-0.47	-0.03	-0.46	0.64	-0.89	0.72	-0.1	-0.36	-0.33	0.61	0.87	-0.3125	-0.0975	0.0075	0.521091	0.859042	0.988594	1	0.999631	0.995409
Bcas1_Q80YN3_S316s_1	1.37	-0.04	0.81	1	-0.41	0.73	0.7	-0.76	-1.91	0.75	-0.71	-0.83	0.17	-0.28	0.15	-1.23	-0.72	-1.46	-1.0825	0.144659	0.0275347	0.0329131	1	0.999631	0.44294
Bcas1_Q80YN3_S388s_1	-0.1	-0.48	-0.18	-0.39	0.14	-0.72	-1.02	-1.59	-0.59	-0.35	-0.67	-0.6	0.93	0.58	-1.31	-0.76	-0.51	-0.265	0.1475	0.204037	0.308881	0.774194	1	0.999631	0.920998
Bcas1_Q80YN3_S390s_1	-0.1	-0.48	-0.18	-0.39	0.14	-0.72	-1.02	-1.59	-0.59	-0.35	-0.67	-0.6	0.93	0.58	-1.31	-0.76	-0.51	-0.265	0.1475	0.204037	0.308881	0.774194	1	0.999631	0.920998
Bcas1_Q80YN3_S414s_1	-0.73	-0.69	0.46	0.13	-0.98	-0.81	-1.01	-1.32	-0.93	0.09	-0.22	0.4	0.31	-1.42	0.42	0.31	-0.8225	0.0425	0.1125	0.0372234	0.918748	0.824819	1	0.999631	0.940061
Bcas1_Q80YN3_S425s_1	-1.05	-1.28	-1.58	-1.65	-0.72	-1.22	-1.32	-1.01	-1.23	-1.3	-1.08	-0.39	0.27	-1.22	-1.92	-0.96	0.3225	0.39	0.4325	0.260896	0.233598	0.366335	1	0.999631	0.745796
Bcas1_Q80YN3_S443s_1	-2.87	1.94	0.36	0.16	1.52	0.38	-1.51	0.68	0.47	-0.67	-0.17	0.97	0.57	1.97	1.31	0.62	0.37	0.2525	1.22	0.718435	0.785316	0.200679	1	0.999631	0.658263
Bcas1_Q80YN3_S497s_1	-3.51	-1.77	-0.33	-2.07	-1.29	-1.85	-0.5	-2.24	-1.07	-2.92	-0.83	-0.7	0.28	-3.68	-1.23	-2.31	0.45	0.54	0.185	0.506916	0.470396	0.839617	1	0.999631	0.946365
Bcas1_Q80YN3_S525s_1	-0.76	-0.71	-0.13	-0.45	-0.95	-0.34	-0.89	-0.3	-0.94	-0.77	-0.38	-0.52	0.02	-0.38	-0.11	-0.89	-0.1075	-0.14	0.1725	0.715519	0.624042	0.598908	1	0.999631	0.855702
Bcas1_Q80YN3_S525s_2	-0.39	1.53	1.55	0.86	0.77	1.04	0.24	0.45	0.35	0.9	0.41	1.46	1.34	1.16	1.53	2.43	-0.2625	-0.1075	0.7275	0.576502	0.828834	0.175064	1	0.999631	0.642116
Bcas1_Q80YN3_S601s_1	0.69	1.2	1.24	1.32	1.54	1.6	0.73	1.25	1.54	0.85	1.59	1.45	-0.14	1.73	2.62	1.59	0.1675	0.245	0.3375	0.58497	0.422189	0.545071	1	0.999631	0.833658
Bcas1_Q80YN3_S615s_1	-0.76	-0.05	-0.09	-0.63	-0.34	0.55	-0.94	-0.56	-0.52	-0.26	-0.12	0.1	0.01	0.35	-0.45	-0.19	0.06	0.1825	0.3125	0.874203	0.547083	0.34937	1	0.999631	0.736792
Bcas1_Q80YN3_T379t_1	-2.02	-1.64	-1.38	-1.08	-3.47	-0.76	-0.92	-1.23	-2	-0.77	-0.62	-2.35	-1.66	-0.56	-2.45	-1.61	-0.065	0.095	-0.04	0.913587	0.837752	0.927469	1	0.999631	0.976306
Bcas1_Q80YN3_T523t_1	-1.58	-0.94	-0.64	-1.06	-0.99	-0.59	-1.42	-1.28	-0.75	-1.29	-1.08	-1.05	-2.07	-0.49	-0.84	-0.96	-0.015	0.0125	-0.035	0.962337	0.966835	0.932195	1	0.999631	0.978188
Bcas1_Q80YN3_T523t_2	-0.39	1.53	1.55	0.86	0.77	1.04	0.24	0.45	0.35	0.9	0.41	1.46	1.34	1.16	1.53	2.43	-0.2625	-0.1075	0.7275	0.576502	0.828834	0.175064	1	0.999631	0.642116
Bcas1_Q80YN3_T591t_1	-0.91	-1.45	-0.56	-0.87	-1.32	-1.56	-1.24	-0.95	-1.14	-1.15	-1.25	-1.29	-0.44	-0.94	-0.51	-1.3	-0.32	-0.26	0.15	0.289642	0.368487	0.659574	1	0.999631	0.880252
Bcas3_Q0VF62_S503s_1	-0.28	-0.62	-1.38	-0.99	-0.22	-1.33	-0.74	-1.02	-1.21	-1.08	-0.52	-0.92	-0.15	-0.2	-0.59	-1.04	-0.01	-0.115	0.3225	0.977738	0.729388	0.383413	1	0.999631	0.754581
Bcas3_Q0VF62_S518s_1	1.16	0.31	0.31	0.13	0.28	-0.43	-0.56	0.57	0.58	0.72	0.1	-0.33	0.69	0.75	-0.29	-0.09	-0.5125	-0.21	-0.2125	0.19234	0.567248	0.584375	1	0.999631	0.849121
Bcas3_Q0VF62_S550s_1	-0.5	-1.11	-0.26	-0.6	-0.73	-0.74	-0.99	-0.56	-0.52	-0.37	-0.87	-0.66	-0.08	-0.16	-0.61	-0.16	-0.1375	0.0125	0.365	0.626086	0.965842	0.255745	1	0.999631	0.690775
Bcas3_Q0VF62_S854s_1	-0.74	-0.07	-0.25	-0.47	0	-0.12	-0.22	-0.31	0.06	-0.18	-0.21	-0.24	-0.32	-0.19	-0.29	-0.46	0.22	0.24	0.0675	0.409629	0.384271	0.8124	1	0.999631	0.937041
Bcas3_Q0VF62_S862s_1	0.14	1.7	1.04	0.44	0.99	1.62	0.17	0.82	1.23	0.46	0.83	1.51	1.69	1.78	0.91	0.62	0.07	0.1775	0.42	0.874385	0.672871	0.35987	1	0.999631	0.741182
Bcas3_Q0VF62_S871s_1	-0.58	-0.02	-1.48	-0.8	0.26	-0.12	-0.49	-1.91	-0.64	-0.91	-0.64	-1.42	0.41	-0.16	-2.08	-3.23	0.155	-0.1825	-0.545	0.766613	0.630475	0.491989	1	0.999631	0.809399
Bckdha_Q3U3J1_S338s_1	0.01	-3.57	-3.23	-3.83	-2.69	-1.86	-0.86	-3.17	-2.58	-1.3	-3.8	-4.92	-2.28	-3.42	-3.65	-5.27	0.51	-0.495	-1	0.570735	0.631109	0.299062	1	0.999631	0.712318
Bckdha_Q3U3J1_S348s_1	-1.09	-0.18	0.19	-0.4	-0.34	-0.24	-0.61	-0.31	-0.29	-0.62	-0.22	0.03	0.59	0.3	0.18	0.15	-0.005	0.095	0.675	0.987731	0.782536	0.0753008	1	0.999631	0.541044
Bckdha_Q3U3J1_T339t_1	0.44	0.01	0.07	0.36	-0.24	0.58	-0.44	0.75	0	0.79	-0.26	0.75	0.33	0	-0.17	-0.67	-0.0575	0.1	-0.3475	0.867777	0.76551	0.29022	1	0.999631	0.706164
Bckdk_D3Z7R0_S31s_1	-0.96	-1.36	-1.11	-1.34	-2.34	-1.25	-0.73	-1.75	-1.45	-0.58	-1.48	-1.52	-0.39	-0.91	-1.39	-1	-0.325	-0.065	0.27	0.394289	0.834963	0.400809	1	0.999631	0.763209
Bcl11a_Q5STS9_S205s_1	-0.5	-0.26	-0.29	-0.68	-0.46	0.06	-0.44	0.41	-0.21	0.16	0.15	-0.97	-0.07	-0.05	0.12	0.43	0.325	0.215	0.54	0.289646	0.523084	0.080254	1	0.999631	0.545579
Bcl11a_Q5STS9_S328s_1	-0.79	0.72	-0.12	-0.43	0.22	0.57	0.52	-0.54	0.47	-0.4	0.93	-0.39	0.79	0.74	0.38	-0.06	0.3475	0.3075	0.6175	0.406937	0.501225	0.146755	1	0.999631	0.618703
Bcl11a_Q5STS9_S431s_1	0.2	1.46	0.99	-0.35	0.14	0.94	0.08	-0.04	1.1	1.51	0.84	1.07	0.77	1.16	1.31	0.19	-0.295	0.555	0.2825	0.513609	0.213986	0.548308	1	0.999631	0.834633
Bcl11a_Q5STS9_S432s_1	2.27	0.87	2.17	1.22	0.13	1.35	1.43	0.89	1.36	2.05	1.48	1.07	0.75	1.24	1.33	1.33	-0.6825	-0.1425	-0.47	0.148103	0.729426	0.255633	1	0.999631	0.690775
Bcl11a_Q5STS9_S608s_1	-0.15	0.65	0.77	0.72	-0.08	-0.02	0.04	0.71	-0.01	0.06	0.81	0.49	0.46	0.28	0.02	0.55	-0.335	-0.16	-0.17	0.320022	0.637246	0.603478	1	0.999631	0.857824
Bcl11a_Q5STS9_S718s_1	0.41	-0.19	0.43	0.56	-0.63	-0.09	0.09	0.57	-0.76	0.28	-0.68	-0.15	0.48	-0.3	0.61	0.68	-0.3175	-0.63	0.065	0.356738	0.0892121	0.850047	1	0.999631	0.949525
Bcl11a_Q5STS9_S86s_1	-0.76	0.16	0.1	-0.12	-0.79	-0.14	-0.5	0.06	-0.44	-0.06	-0.21	0.07	0.52	0.09	0.25	0.66	-0.1875	-0.005	0.535	0.569019	0.987002	0.123708	1	0.999631	0.594905
Bcl11b_Q99PV8_S309s_1	-0.47	0.42	-0.64	-0.2	-0.56	-0.19	-0.8	-0.42	-0.28	-0.02	0.31	0.38	0.72	-0.42	-0.55	0.3	-0.27	0.32	0.235	0.40217	0.344897	0.563081	1	0.999631	0.841038
Bcl11b_Q99PV8_S690s_1	0.32	0.27	-0.53	-0.42	-0.32	-0.52	-0.27	-0.3	0.02	0.85	-0.51	-0.05	0.55	0.43	0.04	0.25	-0.2625	0.1675	0.4075	0.386093	0.66247	0.230627	1	0.999631	0.681463
Bcl11b_Q99PV8_T344t_1	-0.63	-0.44	-0.46	-0.93	-0.51	-0.07	-0.99	-0.87	-0.34	-0.41	-0.66	0.1	0.33	-0.59	-0.86	-0.29	0.005	0.2875	0.2625	0.986666	0.327012	0.450478	1	0.999631	0.787759
Bcl11b_Q99PV8_T672t_1	-0.15	0.26	0.01	-0.29	-0.23	-0.55	-0.67	-0.18	0.16	-0.15	-0.24	0	0.88	0.2	0.14	-0.23	-0.365	-0.015	0.29	0.190943	0.954813	0.391592	1	0.999631	0.758901
Bcl2l13_P59017_S35s_1	-0.63	0.68	-0.31	-0.24	-0.2	-0.07	-0.49	-0.24	-0.6	-0.81	-0.69	-0.43	0.41	-0.44	-0.97	0.02	-0.125	-0.5075	-0.12	0.708921	0.157448	0.77644	1	0.999631	0.921191
Bcl2l13_P59017_S377s_1	-0.29	-1.37	-0.52	-0.84	-0.87	-0.57	-0.97	-0.76	-1.1	-0.2	-1.02	-0.7	-0.4	-0.78	-1.1	-0.34	-0.0375	0	0.1	0.902681	1	0.775739	1	1	0.920998
Bcl2l13_P59017_S387s_1	-2.91	-7.48	-4.95	-6.49	-5.17	-4.52	0.7	-5.87	-4.21	-2.22	-2.35	-2.91	-6.4	-7.33	-4.94	-7.44	1.7425	2.535	-1.07	0.269479	0.0224369	0.292398	1	0.999631	0.706671
Bcl7a_Q9CXE2_S207s_1	0.73	1.29	0.56	0.34	0.82	1.07	0.56	0.06	1.32	1.3	-0.16	0.63	0.33	1.03	0.79	0.46	-0.1025	0.0425	-0.0775	0.759876	0.917699	0.814927	1	0.999631	0.937235
Bcl9_Q9D219_S291s_1	-0.64	0.85	-1.74	-0.94	0.59	0.21	-0.56	-0.57	-0.19	-0.78	-0.32	-0.16	1.03	0.27	-0.45	-0.58	0.535	0.255	0.685	0.352101	0.629013	0.268717	1	0.999631	0.696662
Bcl9_Q9D219_S686s_1	0.87	1.96	1.66	1.36	1.51	1.41	0.96	2.16	1.48	0.86	1.85	2.37	1.28	1.65	2.58	2.34	0.0475	0.1775	0.5	0.895597	0.661957	0.232882	1	0.999631	0.682826
Bcl9l_Q67FY2_S1014s_1	1.65	1.9	1.35	0.92	1.3	1.68	0.99	1.52	1.98	3.19	1.36	1.6	0.25	2.66	1.49	1.92	-0.0825	0.5775	0.125	0.79174	0.218564	0.809416	1	0.999631	0.936582
Bcl9l_Q67FY2_S116s_1	1.94	1.85	1.74	1.35	1.3	1.26	1.73	0.94	2.58	2.18	1.75	1.94	0.99	1.81	1.2	1.65	-0.4125	0.3925	-0.3075	0.169754	0.209105	0.344168	1	0.999631	0.733869
Bclaf1_F8WI22_S177s_1	-1.1	-1.52	-1.06	-1.66	-0.98	-1.76	-1.11	-1.47	-1.27	-1.54	-1.14	-1.23	-0.39	-1.22	-0.95	-1.25	0.005	0.04	0.3825	0.986572	0.884609	0.258183	1	0.999631	0.692624
Bclaf1_F8WI22_S221s_1	-1.45	-1.39	-0.23	-0.45	-1.22	-1.79	-1.12	-0.14	-1.34	-2.33	-0.4	-0.32	-2.95	-0.33	-1.36	0.79	-0.1875	-0.2175	-0.0825	0.678054	0.682769	0.912454	1	0.999631	0.972191
Bclaf1_F8WI22_S261s_2	-1.12	1.5	1.22	0.56	0.22	0.96	0.59	1.36	0.47	0.1	0.61	-0.02	0.99	1.32	0.79	1.1	0.2425	-0.25	0.51	0.676308	0.656576	0.368575	1	0.999631	0.745968
Bclaf1_F8WI22_S261s_3	-0.82	1.79	2.67	1.56	1.16	1.14	1.6	2.76	1.36	-0.28	1.52	3.91	2.7	1.56	0.99	0.48	0.365	0.3275	0.1325	0.622422	0.740265	0.864149	1	0.999631	0.955131
Bclaf1_F8WI22_S263s_3	1.48	0.56	2.37	1.2	1.05	0.32	1.51	2.22	0.07	0.49	2.36	3.28	2.29	2.47	2.32	1.31	-0.1275	0.1475	0.695	0.803129	0.844162	0.150575	1	0.999631	0.623175
Bclaf1_F8WI22_S267s_1	-1.8	-5.4	-3.97	-4.19	-4.08	-5.83	-2.98	-4.47	-4.89	-4.13	-4.14	-4.67	-2.62	-5.71	-5.26	-5.42	-0.5	-0.6175	-0.9125	0.550344	0.380938	0.320578	1	0.999631	0.723684
Bclaf1_F8WI22_S267s_2	-1.22	1.11	1.29	0.62	0.5	0.53	0.71	1.41	0.8	-0.33	0.74	-0.01	1.33	0.74	0.96	1.07	0.3375	-0.15	0.575	0.550542	0.797706	0.307265	1	0.999631	0.717856
Bclaf1_F8WI22_S267s_3	-0.82	1.79	2.24	1.03	1.16	1.14	1.48	1.96	1.36	-0.28	2.67	2.98	2.7	1.56	2.76	1.61	0.375	0.6225	1.0975	0.554708	0.482207	0.125765	1	0.999631	0.596745
Bclaf1_F8WI22_S284s_2	-0.33	-0.42	0.37	-0.18	-0.18	-0.04	-0.64	-0.46	0.02	0.18	-0.44	0.23	0.71	-0.05	0.15	0.44	-0.19	0.1375	0.4525	0.520416	0.654037	0.182701	1	0.999631	0.643861
Bclaf1_F8WI22_S289s_1	0.22	-0.24	0.34	0.19	-0.94	-0.83	-0.51	-0.04	-1.46	-1.35	-0.59	-0.55	0.32	-0.88	0.37	0.09	-0.7075	-1.115	-0.1525	0.0382698	0.00658567	0.67689	1	0.999631	0.886865
Bclaf1_F8WI22_S289s_2	-1.03	-1.09	0.37	-0.18	-0.64	-0.76	-0.64	-0.46	-0.84	-0.95	-0.44	0.23	-0.41	-0.84	0.15	0.44	-0.1425	-0.0175	0.3175	0.704061	0.968089	0.487619	1	0.999631	0.805946
Bclaf1_F8WI22_S395s_1	-1.49	-2.17	1.57	-1.46	-0.71	-2.39	3.25	0.4	-0.72	-2.01	2.19	3.73	-0.29	-2.52	1.43	0.22	1.025	1.685	0.5975	0.415606	0.224115	0.555379	1	0.999631	0.838109
Bclaf1_F8WI22_S494s_1	-0.46	-0.35	0.05	-0.39	-1.15	-0.87	-0.5	-0.07	-1	-0.3	-0.28	-0.58	-0.72	-0.88	0.12	-0.02	-0.36	-0.2525	-0.0875	0.267255	0.39314	0.796978	1	0.999631	0.929975
Bclaf1_F8WI22_S510s_1	-0.89	-0.09	0.19	-0.44	-0.22	-0.15	-0.51	-0.05	-0.1	-0.31	-0.1	0.07	0.92	0.61	0.36	0.54	0.075	0.1975	0.915	0.808424	0.53076	0.0189941	1	0.999631	0.391024
Bclaf1_F8WI22_S646s_1	0.71	-0.37	0.13	-0.14	-0.21	0.21	0.38	-0.53	0.53	1.29	-0.04	-0.73	0.27	-0.36	-0.12	-0.53	-0.12	0.18	-0.2675	0.727625	0.703254	0.449797	1	0.999631	0.78723
Bclaf1_F8WI22_S656s_1	-0.22	0.06	-0.07	-0.55	-0.08	-0.07	-0.68	0	-0.1	0.2	-0.1	0.01	0.84	0.58	0.16	0.61	-0.0125	0.1975	0.7425	0.964819	0.463988	0.0304247	1	0.999631	0.438141
Bclaf1_F8WI22_S759s_1	-0.04	-1.3	1.25	-0.01	-0.57	-0.85	2.23	-0.11	-0.27	-2.28	0.39	0.87	-1.42	-3.36	0.83	-0.95	0.2	-0.2975	-1.2	0.794203	0.698044	0.188689	1	0.999631	0.648183
Bclaf1_F8WI22_T256t_2	-1.4	0.37	1.91	1.13	0.91	-0.32	1.63	1.86	1.27	-1.18	1.76	0.05	1.83	-0.45	2.27	0.73	0.5175	-0.0275	0.5925	0.49882	0.974	0.471801	1	0.999631	0.798564
Bclaf1_F8WI22_T256t_3	-4.43	2.22	2.37	1.2	1.33	1.5	1.51	2.22	1.94	-0.34	2.36	3.28	3.27	1.66	2.32	1.31	1.3	1.47	1.8	0.3573	0.344817	0.218667	1	0.999631	0.669859
Bclaf1_F8WI22_T305t_1	-0.03	-0.55	-0.66	-1.56	-0.5	-0.34	-0.34	-0.71	-0.91	0.16	-0.81	-0.8	0.52	0.45	0.3	-0.4	0.2275	0.11	0.9175	0.526968	0.789751	0.043282	1	0.999631	0.475443
Bclaf1_F8WI22_T339t_1	-0.53	0.57	0.79	0.49	-0.75	0.56	-0.36	-0.03	0.85	0.77	0.29	0.29	0.4	-0.16	-0.26	0.05	-0.475	0.22	-0.3225	0.25882	0.547385	0.393321	1	0.999631	0.759134
Bcor_Q8CGN4_S1391s_1	2.55	0.64	1.68	1.43	0.05	0.96	1.78	0.52	0.45	1.92	0.18	-0.54	0.15	-0.48	0.72	-0.22	-0.7475	-1.0725	-1.5325	0.161112	0.0955337	0.00762395	1	0.999631	0.358173
Bcr_Q6PAJ1_S356s_1	0.77	0.32	-0.23	0.51	0.86	0.6	0.18	1.1	0.47	0.39	0.69	0	-0.14	0.91	0.54	0.58	0.3425	0.045	0.13	0.313697	0.887306	0.716862	1	0.999631	0.903251
Bcr_Q6PAJ1_S384s_1	-0.68	-0.35	-0.45	-1.2	-0.94	-0.7	-1.43	-1.73	-0.91	-0.39	-1.99	-0.76	2.1	-0.13	0.23	-1.53	-0.53	-0.3425	0.8375	0.139993	0.404933	0.240119	1	0.999631	0.683719
Bcr_Q6PAJ1_S697s_1	2.09	0.64	0.67	1.04	0.72	1.38	1.64	0.76	1.25	1.07	1	0.67	-1.01	0.31	0.92	-0.32	0.015	-0.1125	-1.135	0.97074	0.768463	0.0469625	1	0.999631	0.480102
Begain_F8WIG2_S16s_1	3.82	0.99	0.51	1.99	1.52	1.14	1.82	0.86	1.2	0.82	0.68	0.39	-1.32	-0.68	0.21	-0.29	-0.4925	-1.055	-2.3475	0.473046	0.140854	0.00745533	1	0.999631	0.358173
Begain_F8WIG2_S265s_1	-0.63	-0.61	-0.59	-0.95	-0.99	-1.02	-1.18	-0.8	-1.16	-0.87	-0.96	-0.52	-0.46	-0.73	-1.16	-0.53	-0.3025	-0.1825	-0.025	0.236304	0.50352	0.932113	1	0.999631	0.978188
Begain_F8WIG2_S460s_1	1.76	-1.36	-1.69	0.31	0.82	-1.14	1.39	-0.36	0.16	-0.6	-0.15	-2.84	-3.6	-1.25	-2.15	-2.17	0.4225	-0.6125	-2.0475	0.622481	0.506338	0.0286567	1	0.999631	0.427571
Begain_F8WIG2_S482s_1	-1.56	1.06	-1.03	-1.13	0.84	1.54	-0.92	-2.14	1.52	-1.72	-1.5	-0.89	1.51	-0.62	-1.14	-1.6	0.495	0.0175	0.2025	0.578921	0.983133	0.797561	1	0.999631	0.930124
Begain_F8WIG2_S492s_1	-0.02	-0.21	-0.24	-0.32	-0.35	0.09	-0.62	-0.41	0.15	-0.11	-0.35	-0.29	0.4	-0.03	-0.35	-0.12	-0.125	0.0475	0.1725	0.636637	0.854095	0.555059	1	0.999631	0.838109
Begain_F8WIG2_S529s_1	0.52	-0.64	-0.99	0.25	0.37	-0.03	0	0.18	-0.05	-0.45	0.34	-0.71	-1.1	-0.32	0.03	-0.26	0.345	-0.0025	-0.1975	0.377045	0.995317	0.652788	1	0.999631	0.877763
Begain_F8WIG2_S579s_1	-0.64	-0.59	-0.18	-1.26	-1.33	-0.7	-1.1	-0.96	-1.8	-0.66	-1.61	-2.99	0.21	-0.74	-1.11	-0.49	-0.355	-1.0975	0.135	0.271998	0.0504441	0.728502	1	0.999631	0.905923
Begain_F8WIG2_S589s_1	0.49	0.99	0.46	0.06	0.46	1.03	-0.18	0.33	0.28	0.71	0.5	0.25	0.56	1.17	0.36	1.1	-0.09	-0.065	0.2975	0.794535	0.827075	0.39183	1	0.999631	0.758901
Begain_F8WIG2_Y495y_1	-0.71	-0.77	-1.05	-0.4	-0.57	-1.23	-0.6	-0.45	-0.76	-0.85	-0.62	-0.05	-1.33	-0.96	-0.69	-0.71	0.02	0.1625	-0.19	0.945186	0.590875	0.534224	1	0.999631	0.828493
Begain_F8WIG2_Y614y_1	-0.2	-1.55	-1.25	-1.11	0.59	-0.05	0	-2.11	-0.4	-2.35	-0.58	-0.68	-0.05	1.26	-2.4	-0.81	0.635	0.025	0.5275	0.300929	0.960736	0.470977	1	0.999631	0.797962
Bet1_O35623_S50s_1	0.4	0.98	0.24	0.77	1.53	0.51	0.35	0.34	1.21	-0.11	0.28	-0.61	-1	1.48	-0.28	0.87	0.085	-0.405	-0.33	0.811906	0.349916	0.548007	1	0.999631	0.834507
Bicd1_G3UXK5_S546s_1	0.08	-0.44	-1.85	0.53	0.34	-0.56	-0.25	0.17	0.07	-0.35	-0.18	-0.05	-0.1	-0.07	0.02	-0.32	0.345	0.2925	0.3025	0.508941	0.560275	0.548328	1	0.999631	0.834633
Bicd2_D3Z390_S504s_1	-0.2	0.07	0.2	-0.01	-0.11	0.14	-0.19	0.17	0.24	0.38	0.33	0.61	0.61	0.75	0.61	0.72	-0.0125	0.375	0.6575	0.959745	0.162213	0.0302193	1	0.999631	0.437261
Bin1_Q6P1B9_S245s_1	-0.2	1.51	1.12	-1.11	2.01	0.37	2.21	-0.17	2.5	-0.64	1.52	2.88	2.97	-0.22	-0.08	-0.27	0.775	1.235	0.27	0.311104	0.176244	0.754226	1	0.999631	0.913377
Bin1_Q6P1B9_S265s_1	-0.72	-0.79	-0.77	-0.96	-0.95	-0.57	-1.46	-0.95	-0.63	-0.51	-1.33	-0.98	0.41	-0.2	-1.28	-0.67	-0.1725	-0.0525	0.375	0.535775	0.853548	0.349314	1	0.999631	0.736792
Bin1_Q6P1B9_S265s_2	-0.5	0.08	0.27	-0.58	-0.23	-0.47	-0.35	-0.11	-0.21	-0.57	0	0.18	0.91	-0.24	-0.29	0.17	-0.1075	0.0325	0.32	0.714738	0.919745	0.411718	1	0.999631	0.767937
Bin1_Q6P1B9_S267s_1	-0.47	-0.51	-1.62	-1.77	-0.56	-0.56	-1.92	-1.55	-0.56	-0.82	-1.89	-1.54	0.25	-0.21	-1.93	-1.43	-0.055	-0.11	0.2625	0.906743	0.809302	0.646772	1	0.999631	0.874255
Bin1_Q6P1B9_S267s_2	-0.37	-0.64	0.23	-0.49	-0.18	-0.99	-0.29	-0.22	-0.71	-0.71	0.08	-0.01	0.49	-1.39	-0.63	0.16	-0.1025	-0.02	-0.025	0.748423	0.952515	0.956393	1	0.999631	0.984803
Bin1_Q6P1B9_S273s_1	0.01	0.97	0.28	-0.48	0	0.07	-0.79	-0.81	-0.18	0.6	-0.01	0.03	1.35	0.87	-0.07	0.23	-0.5775	-0.085	0.4	0.165513	0.819753	0.375792	1	0.999631	0.748307
Bin1_Q6P1B9_S273s_2	-0.47	0.41	0.32	-0.71	-0.14	-0.1	-0.43	0.03	-0.13	-0.37	-0.11	0.4	0.92	0.18	0.1	0.19	-0.0475	0.06	0.46	0.887239	0.866988	0.241063	1	0.999631	0.684338
Bin1_Q6P1B9_S293s_1	-0.8	-0.87	-1.09	-1.07	-0.64	-0.82	-0.97	-2.7	-0.94	-1.02	-0.85	-0.88	-0.74	-1.25	-1.2	-0.95	-0.325	0.035	-0.0775	0.487855	0.886083	0.781031	1	0.999631	0.921543
Bin2_S4R2J8_S393s_1	0.7	0.84	1.26	0.77	-0.29	0.7	0.41	1.36	0.27	1.39	0.59	1.49	0.16	1.69	1.75	1.63	-0.3475	0.0425	0.415	0.369461	0.905663	0.33307	1	0.999631	0.728079
Bin2_S4R2J8_S415s_1	0.01	0.22	0.24	-1.28	0.16	-0.01	-0.54	-0.08	0.79	-0.91	0.27	-4.49	0.39	0.01	-1.96	-1.61	0.085	-0.8825	-0.59	0.830867	0.417992	0.35356	1	0.999631	0.73949
Bin2_S4R2J8_S415s_2	0.48	0.25	-0.07	0.9	-0.72	-0.55	-1.12	-0.35	0.33	0.99	0.32	-0.01	0.01	0.47	-2.1	0.81	-1.075	0.0175	-0.5925	0.00634522	0.958775	0.350543	1	0.999631	0.737333
Bin2_S4R2J8_S428s_1	1.06	1.41	0.65	0.69	0.39	0.97	0.63	0.42	1.17	1.78	1	0.45	2.15	1.34	1.19	0.89	-0.35	0.1475	0.44	0.248966	0.683179	0.248495	1	0.999631	0.685751
Bin2_S4R2J8_S448s_1	1.25	0.49	1.96	1.44	1.03	1.27	1.27	1.13	1.05	1.44	1.05	0.86	-1.38	0.84	1.9	0.46	-0.11	-0.185	-0.83	0.749148	0.610489	0.232586	1	0.999631	0.682545
Bin2_S4R2J8_T392t_1	1.05	1.01	1.29	1.1	-0.16	0.79	0.52	1.5	-0.05	1.65	0.2	1.68	-0.31	1.77	1.88	1.72	-0.45	-0.2425	0.1525	0.240026	0.596887	0.763204	1	0.999631	0.915608
Birc6_S4R1L5_S2216s_1	1.61	0.05	1.28	1.06	-0.87	0.67	1.97	-0.14	-0.11	2.18	0.29	-0.05	-0.13	-0.8	0.3	0.34	-0.5925	-0.4225	-1.0725	0.354156	0.475225	0.0309893	1	0.999631	0.44065
Birc6_S4R1L5_S552s_2	-0.2	0.47	0.14	0.01	0.37	0	0.26	0.11	0.67	0.83	0.88	0.79	0.17	0.55	-0.67	0.32	0.08	0.6875	-0.0125	0.761586	0.0254569	0.971852	1	0.999631	0.989788
Birc6_S4R1L5_S556s_1	0.21	-1	0.13	-0.36	-1.41	0.54	0.1	-0.26	-0.75	0.4	-1.15	-1.18	-0.27	-0.57	-1.1	0.3	-0.0025	-0.415	-0.155	0.99581	0.370464	0.711673	1	0.999631	0.900631
Birc6_S4R1L5_S556s_2	-0.2	0.47	0.14	0.01	0.37	0	0.26	0.11	0.67	0.83	0.88	0.79	0.17	0.55	-0.67	0.32	0.08	0.6875	-0.0125	0.761586	0.0254569	0.971852	1	0.999631	0.989788
Bles03_Q8VD62_S59s_1	-0.72	2.37	-0.61	0.5	0.37	0.73	-0.23	-1.12	1.6	1.34	-0.35	-1.22	0.81	1.89	-0.24	-0.03	-0.4475	-0.0425	0.2225	0.541227	0.960549	0.769597	1	0.999631	0.918554
Bloc1s4_Q8VED2_S11s_1	-0.03	-1.17	-0.67	-0.79	0.32	-0.05	-0.26	0.4	-0.59	1.56	-0.78	-0.6	0.14	1.38	-1.94	-0.17	0.7675	0.5625	0.5175	0.0385724	0.326805	0.433753	1	0.999631	0.779567
Bmp2k_Q91Z96_S1087s_1	0.04	0.16	-0.41	-0.68	0.45	1.05	-0.05	-0.09	0.32	-0.75	-0.37	-0.04	0.43	1	-0.15	0.02	0.5625	0.0125	0.5475	0.138539	0.970983	0.158264	1	0.999631	0.628615
Bmp2k_Q91Z96_T644t_1	0.37	-1.29	0.78	0.62	-1.2	-1.4	0.96	0.5	-0.73	-0.48	1.32	0.3	-1.13	-1.54	0.23	0.89	-0.405	-0.0175	-0.5075	0.553668	0.97687	0.451851	1	0.999631	0.788148
Bmpr2_O35607_S515s_1	-0.51	-0.64	-0.55	-0.74	0.12	-0.3	-0.76	-0.73	-0.31	-0.27	-0.63	-0.44	-0.14	-0.09	-0.44	-0.6	0.1925	0.1975	0.2925	0.508442	0.433598	0.303755	1	0.999631	0.715879
Bmpr2_O35607_S586s_1	0.72	-0.59	-3.01	1.12	1.77	0.1	1.51	0.63	0.68	-0.66	0.25	0.7	-1.34	-0.37	-0.48	0.03	1.4425	0.6825	-0.1	0.123775	0.434456	0.905738	1	0.999631	0.969317
Bmpr2_O35607_S680s_1	-3.79	-0.43	-0.14	0.52	0.25	-0.19	0.36	0.69	0.11	-0.27	1.49	0.68	0.93	-0.16	0.48	0.45	1.2375	1.4625	1.385	0.16925	0.129381	0.129819	1	0.999631	0.601246
Bmpr2_O35607_S862s_1	-0.98	-0.97	-0.87	-1.34	-1.27	-0.56	-1.49	-1.71	-1.47	-1.05	-0.93	-0.63	0.18	-1.03	-1.7	-0.67	-0.2175	0.02	0.235	0.500166	0.944828	0.577795	1	0.999631	0.84622
Bmpr2_O35607_S863s_1	-0.81	-0.89	-1.07	-1.49	-1.04	-1.13	-1.27	-1.45	-0.99	-0.7	-0.99	-0.47	-0.27	-0.73	-1.54	-0.75	-0.1575	0.2775	0.2425	0.562107	0.345257	0.501477	1	0.999631	0.814092
Bmpr2_O35607_T517t_1	-0.7	-0.51	-0.59	-0.28	-0.6	-1.03	-0.73	-0.01	-0.81	-0.54	-0.48	0.51	-0.25	-0.59	-0.24	-0.38	-0.0725	0.19	0.155	0.807428	0.584577	0.572922	1	0.999631	0.844402
Bnip3_O55003_S79s_1	0.25	0.2	-0.21	-0.26	-0.12	0.14	-0.57	-0.54	-0.04	0.25	-0.26	-0.09	0.1	0.54	0.17	-0.29	-0.2675	-0.03	0.135	0.366499	0.912949	0.664713	1	0.999631	0.882317
Bnip3_O55003_S88s_1	-1.54	-0.09	-0.06	-0.52	-0.51	-0.22	-0.73	-0.65	-0.29	-0.4	-0.44	0.12	0.47	0.15	-0.09	0.29	0.025	0.3	0.7575	0.947206	0.445663	0.0779041	1	0.999631	0.543121
Bnip3_O55003_T66t_1	2.62	0.46	0.56	0.68	-0.54	0.03	2.06	-0.05	-0.35	0.84	-0.41	-0.2	-2.18	-1.43	-0.89	-0.93	-0.705	-1.11	-2.4375	0.317234	0.0674138	0.00133519	1	0.999631	0.351308
Bnip3l_Q91Z78_S165s_1	-0.45	1.03	0.46	0.45	0.55	1.39	0.12	0.88	1.31	1.09	0.77	0.8	0.94	1.35	1.05	0.69	0.3625	0.62	0.635	0.383989	0.112489	0.114253	1	0.999631	0.579001
Bnip3l_Q91Z78_S167s_1	0.02	2.64	2.35	1.2	0.99	2.37	0.35	2.3	2.59	2.5	1.44	1.87	2.95	2.73	1.74	1.81	-0.05	0.5475	0.755	0.942175	0.371287	0.235448	1	0.999631	0.683301
Bod1l_E9Q6J5_S1989s_1	-0.16	0.66	0.49	-0.15	0.38	-0.68	-0.42	-0.56	0.42	-0.81	0.23	0.08	0.12	0.79	0.87	-1.22	-0.53	-0.23	-0.07	0.153328	0.540863	0.889616	1	0.999631	0.963505
Bod1l_E9Q6J5_S2898s_1	0.77	0.43	1.4	-0.2	1.04	0.39	0.54	0.69	2.02	1.5	0.62	1.36	1.73	1.54	1.66	0.56	0.065	0.775	0.7725	0.863043	0.101741	0.101303	1	0.999631	0.564448
Bod1l_E9Q6J5_T2890t_1	0.33	3.17	1.67	1.43	0.99	2.43	0.53	1.88	1.65	2.41	2.54	1.66	2.14	3.22	0.86	2.81	-0.1925	0.415	0.6075	0.766617	0.479494	0.389985	1	0.999631	0.758901
Bola1_Q9D8S9_S81s_1	-0.2	0.1	1.2	0.83	0.64	0.91	-0.16	0.34	0.97	1.12	0.64	1.1	-0.58	2.32	1.38	1.39	-0.05	0.475	0.645	0.900465	0.217854	0.314841	1	0.999631	0.720305
Bop1_P97452_S559s_1	0.24	-0.68	-0.13	-0.96	-0.73	-3.01	-0.78	-0.63	-0.03	-1.6	0.05	1.11	-0.08	-0.95	-0.86	-1.05	-0.905	0.265	-0.3525	0.141208	0.643918	0.368416	1	0.999631	0.745968
Bptf_E9Q6A7_S228s_1	0.11	0.33	0.47	-0.07	0.08	0.1	-0.16	-0.02	0.02	0.55	0.61	0.68	0.55	0.72	0.16	0.63	-0.21	0.255	0.305	0.41252	0.380056	0.307626	1	0.999631	0.717856
Bptf_E9Q6A7_S2353s_1	0.49	0.4	0.97	0.32	0.23	0.19	-0.24	0.41	0.17	1.02	0.41	0.83	0.55	1.03	0.63	0.63	-0.3975	0.0625	0.165	0.179143	0.840277	0.578562	1	0.999631	0.84622
Braf_P28028_S348s_1	0.29	0.74	1.34	0.92	0.67	0.82	0.22	1.16	0.41	0.74	0.53	1.29	0.77	0.71	1.23	1.38	-0.105	-0.08	0.2	0.752361	0.813314	0.559236	1	0.999631	0.839222
Braf_P28028_S714s_1	0	-0.12	0.6	0.06	-1.06	-0.16	-0.2	0.2	-0.72	0.06	0.11	-0.06	-0.48	-0.32	0.39	0.36	-0.44	-0.2875	-0.1475	0.220364	0.370818	0.666784	1	0.999631	0.88264
Braf_P28028_S735s_1	-0.21	0.59	0.24	-0.31	-0.16	0.24	-0.72	0.01	0.29	-0.37	-0.31	-0.11	0.23	-0.21	0.12	0.36	-0.235	-0.2025	0.0475	0.485039	0.528293	0.882886	1	0.999631	0.963505
Braf_P28028_T384t_1	-0.02	0.29	0.21	0.68	-0.21	-0.11	0.12	0.81	0.23	-0.05	0.04	0.36	0.25	0.31	0.54	0.62	-0.1375	-0.145	0.14	0.668862	0.601126	0.631475	1	0.999631	0.867623
Braf_P28028_T790t_1	1.07	1.34	-0.2	1.77	1.64	1.53	1.3	0.45	1.09	0.43	1.29	0.58	-1.66	1.4	0.56	1.61	0.235	-0.1475	-0.5175	0.624092	0.748076	0.497863	1	0.999631	0.811908
Brap_Q99MP8_S86s_1	0.03	1.49	1.59	1.4	0.9	0.59	0.87	0.26	2.01	0.57	0.68	2.83	1.35	0.61	1.36	1.53	-0.4725	0.395	0.085	0.255844	0.514575	0.843225	1	0.999631	0.94821
Brap_Q99MP8_S86s_2	0.05	0.69	0.6	1.52	0.94	0.61	1.07	0.79	1.04	0.59	2.36	1.97	1.07	0.47	0.73	1.58	0.1375	0.775	0.2475	0.694603	0.135412	0.546847	1	0.999631	0.834213
Brd1_G5E8P1_T885t_1	0.01	2.73	3.45	-0.1	2.97	0.56	5.6	0.96	5.58	0.7	4.05	5.19	5.11	-1.35	2.49	-0.79	1	2.3575	-0.1575	0.433535	0.0801147	0.915325	1	0.999631	0.97286
Brd3_Q8K2F0_S262s_1	-0.4	0.2	0.58	0.13	0.07	-0.3	-0.17	-0.08	-0.27	0.08	0.02	0.15	0.49	0.23	-0.2	0.59	-0.2475	-0.1325	0.15	0.400826	0.659219	0.65707	1	0.999631	0.879129
Brd4_Q3UH70_S603s_1	-0.69	0.41	1.12	0.62	0.43	0.35	-0.05	0.67	0.2	0.31	0.81	0.93	0.58	1.01	0.67	0.81	-0.015	0.1975	0.4025	0.970799	0.643237	0.339731	1	0.999631	0.732291
Brd8_D3YZC7_S547s_1	1.11	0.7	1.78	1.74	0.31	1.01	2.26	0.38	0.59	1.31	0.93	0.77	0.51	-0.03	0.86	-1.17	-0.3425	-0.4325	-1.29	0.491142	0.22885	0.0245136	1	0.999631	0.417261
Brd8_D3YZC7_T264t_1	0.48	2.03	1.79	0.95	1.2	1.65	-0.03	0.3	1.5	0.7	1.44	1.33	2.15	2.31	1.64	1.54	-0.5325	-0.07	0.5975	0.300049	0.865206	0.17718	1	0.999631	0.642116
Brd9_Q3UQU0_S565s_1	2.06	0.83	1.8	0.33	0.17	0.91	1.26	1.08	0.57	1.64	0.33	0.57	-0.72	0.03	0.22	0.12	-0.4	-0.4775	-1.3425	0.388387	0.333353	0.0137816	1	0.999631	0.385092
Brf1_G3X8S2_S358s_1	1.06	2.49	2.96	1.75	1.48	2.27	3.14	1.27	1.93	0.88	1.93	1.65	1.39	0.55	1.73	0.54	-0.025	-0.4675	-1.0125	0.963536	0.332191	0.0637379	1	0.999631	0.513532
Brf1_G3X8S2_S552s_1	1.14	1.34	0.48	1.16	1.02	0.17	0.18	1.45	1.38	0.91	1.1	1.7	1.19	1.25	1	0.56	-0.325	0.2425	-0.03	0.404477	0.45164	0.926232	1	0.999631	0.97588
Brsk1_Q5RJI5_S384s_1	1.7	0.27	-0.08	1.42	1.48	1.26	1.49	1.57	0.39	0.15	0.89	-0.37	-1.48	1.21	0.14	0.47	0.6225	-0.5625	-0.7425	0.170126	0.262448	0.263867	1	0.999631	0.693392
Brsk1_Q5RJI5_S399s_1	-0.21	-0.33	-0.92	-0.1	0.03	-0.13	-0.25	0.05	-0.11	-0.3	-0.54	-0.24	0.41	-0.16	-0.54	-0.16	0.315	0.0925	0.2775	0.274555	0.750203	0.417483	1	0.999631	0.771469
Brsk1_Q5RJI5_S427s_1	1.26	-0.51	-0.45	0.03	0.61	0.75	0.65	0.48	0.32	-0.01	-0.01	-0.47	-0.08	0.06	0.78	-0.85	0.54	-0.125	-0.105	0.211387	0.775524	0.835375	1	0.999631	0.944699
Brsk1_Q5RJI5_S432s_1	0.86	-0.32	0.47	-0.06	0.49	0.53	0.41	0.75	0.49	-0.76	0.97	1.08	0.49	1.03	0.64	0.87	0.3075	0.2075	0.52	0.350608	0.665879	0.158457	1	0.999631	0.628615
Brsk1_Q5RJI5_S450s_1	0.43	0.12	-0.82	0.15	0.99	0.39	-0.08	0.27	0.25	-0.26	-0.11	-0.32	-1.14	0.6	0.11	-0.1	0.4225	-0.08	-0.1025	0.270237	0.816196	0.821394	1	0.999631	0.938464
Brsk1_Q5RJI5_S499s_1	0.92	2.3	1.78	0.57	0.76	1.48	-0.02	1.13	1.41	2.01	1.04	1.02	0.66	2.53	1.2	0.85	-0.555	-0.0225	-0.0825	0.266368	0.960033	0.878615	1	0.999631	0.96244
Brsk1_Q5RJI5_S508s_1	0.74	0.37	-0.61	0.75	1.28	1.08	0.45	1.16	0.83	0.33	0.92	0.01	-1.06	1.16	0.65	0.94	0.68	0.21	0.11	0.100106	0.600658	0.842919	1	0.999631	0.94811
Brsk1_Q5RJI5_S519s_1	-0.73	-0.69	-1.46	-0.35	0.09	0.4	-0.19	0.37	-0.06	-0.28	-0.41	-0.72	-0.23	0.59	-0.4	-0.32	0.975	0.44	0.7175	0.0117794	0.198394	0.0762535	1	0.999631	0.542251
Brsk1_Q5RJI5_S519s_2	-0.25	-0.06	-1.11	0.58	0.98	0.9	0.52	0.53	0.23	-0.17	1.69	0.56	0.01	-0.34	1.33	0.87	0.9425	0.7875	0.6775	0.0314218	0.141217	0.193851	1	0.999631	0.650692
Brsk1_Q5RJI5_S527s_1	-0.57	-0.65	0.2	-0.57	-0.8	-0.33	-0.82	-0.21	-0.84	-0.5	-0.22	0.2	-0.07	0.52	0.34	0.56	-0.1425	0.0575	0.735	0.647486	0.866407	0.0440892	1	0.999631	0.475443
Brsk1_Q5RJI5_S751s_1	1.04	0.58	0.11	1.16	0.64	1.19	0.91	1.33	1.04	0.7	1.03	0.15	-5.05	1.18	0.81	1.17	0.295	0.0075	-1.195	0.377764	0.983096	0.370105	1	0.999631	0.746338
Brsk1_Q5RJI5_T535t_1	-0.53	-0.05	-0.28	0.1	0.21	-0.19	-0.21	0.44	-0.2	-0.52	0.34	-0.06	0.05	-0.2	0.31	0.76	0.2525	0.08	0.42	0.386778	0.790515	0.215874	1	0.999631	0.668602
Brsk1_Q5RJI5_T739t_1	1.9	-1.31	1.5	1.21	0.24	0.57	1.26	0.42	-0.39	1.33	-0.76	0.05	-1.13	0.24	0.85	-0.01	-0.2025	-0.7675	-0.8375	0.7644	0.32342	0.270928	1	0.999631	0.698674
Brsk2_G3UWV4_S368s_1	1.16	0.43	0.31	1.26	1.31	1.65	1.24	1.57	0.87	0.55	1.54	0.55	-1.25	1.42	0.81	1.29	0.6525	0.0875	-0.2225	0.0617247	0.811798	0.714304	1	0.999631	0.901694
Brsk2_G3UWV4_S383s_1	-0.25	0.02	-0.17	0.51	0.41	-0.58	0.18	0.77	0.19	-0.76	0.39	0.07	-0.3	0.11	-0.41	0.39	0.1675	-0.055	-0.08	0.641253	0.873844	0.80729	1	0.999631	0.935604
Brsk2_G3UWV4_S394s_1	0.17	-0.12	-0.77	-0.4	-0.23	-0.52	-0.88	-0.23	-0.52	-0.54	-0.26	-0.07	-0.23	0.39	0.37	0.27	-0.185	-0.0675	0.48	0.553072	0.823957	0.162849	1	0.999631	0.631442
Brsk2_G3UWV4_S417s_1	-0.44	1.39	0.56	0.45	1.19	0.66	0.31	0.22	0.63	-0.26	0.51	1.1	0.66	0.97	0.53	0.59	0.105	0.005	0.1975	0.805967	0.991265	0.629579	1	0.999631	0.866951
Brsk2_G3UWV4_S458s_1	1.47	-0.08	-0.38	0.58	1.2	0.72	1.09	0.85	0.69	0.56	0.94	-0.07	-1.78	0.72	0.38	0.09	0.5675	0.1325	-0.545	0.197745	0.770225	0.393635	1	0.999631	0.759138
Brsk2_G3UWV4_S462s_1	1.08	0.64	-0.67	0.53	1.52	1.02	0.16	0.02	1.16	0.53	0.25	-0.07	-1.17	1.31	0.05	0.32	0.285	0.0725	-0.2675	0.562526	0.871537	0.646847	1	0.999631	0.874255
Brsk2_G3UWV4_S478s_1	-0.59	0.06	-0.6	-0.8	-0.59	-0.84	-0.4	0.34	-1.28	-0.7	-0.04	0.37	0.13	-0.39	0.28	-0.17	0.11	0.07	0.445	0.751529	0.86594	0.187519	1	0.999631	0.646474
Brsk2_G3UWV4_S512s_1	0.1	0.82	0.35	0.62	1.87	2.09	0.64	1.63	1.29	0.19	1.19	1.06	-0.34	2.02	1.69	0.97	1.085	0.46	0.6125	0.0149971	0.198864	0.253482	1	0.999631	0.688735
Brsk2_G3UWV4_S536s_1	-0.91	-0.07	0.11	-0.41	0.21	-0.12	-0.79	-0.62	0.03	-0.49	-0.72	-0.35	0.69	0.02	-0.1	0.06	-0.01	-0.0625	0.4875	0.977192	0.84881	0.180426	1	0.999631	0.64376
Brsk2_G3UWV4_T454t_1	1.91	0.87	1.56	1.85	0.96	2.08	1.83	1.54	0.51	1.55	1.11	0.25	-1.63	1.29	0.89	1.25	0.055	-0.6925	-1.0975	0.879131	0.103422	0.120958	1	0.999631	0.588397
Brsk2_G3UWV4_T466t_1	0.74	1.24	1.31	1.11	0.17	2.33	0.77	1.78	1.28	0.37	1.29	0.4	-0.45	0.75	-0.02	1.87	0.1625	-0.265	-0.5625	0.734181	0.439017	0.277717	1	0.999631	0.700874
Brsk2_G3UWV4_T470t_1	1.89	1.34	0.7	1.96	1.19	1.79	2.3	1.6	1.2	2.15	1.09	-0.29	-0.48	1.12	0.39	0.82	0.2475	-0.435	-1.01	0.523629	0.429174	0.0464935	1	0.999631	0.479949
Brsk2_G3UWV4_T486t_1	-0.43	0.3	0.23	-0.84	-0.48	-0.1	-1.11	-0.17	-0.07	-0.29	-0.29	0.29	0.87	0.35	-0.12	-0.05	-0.28	0.095	0.4475	0.460647	0.784433	0.264294	1	0.999631	0.6935
Brwd1_Q921C3_S1751s_1	-0.33	-0.43	-0.87	-0.74	-1.08	-0.52	-0.71	-1.33	-0.35	-0.34	-0.96	-1.44	-1.17	-1.07	-0.65	-1.37	-0.3175	-0.18	-0.4725	0.291893	0.599107	0.14064	1	0.999631	0.612258
Brwd1_Q921C3_S1830s_1	-0.45	1.44	-2.42	-2.06	-0.48	-0.55	-2.48	-2.7	0.15	0.15	-3.03	-1.64	1.44	0.25	-3.95	-3.22	-0.68	-0.22	-0.4975	0.467302	0.827821	0.709347	1	0.999631	0.899175
Brwd1_Q921C3_S1857s_1	-1.02	-2.15	-0.37	-0.55	-2.08	-2.35	-0.77	-0.96	-1.94	-0.83	-0.77	0.86	-0.71	-1.75	1.15	0.55	-0.5175	0.3525	0.8325	0.334183	0.580969	0.23812	1	0.999631	0.683301
Brwd1_Q921C3_S2035s_1	-1.53	-1.79	0	0.44	-2.14	0.39	0.59	-0.53	-1.77	-1.48	0.15	0.39	-1.68	-1.74	0.28	-0.91	0.2975	0.0425	-0.2925	0.685851	0.951283	0.654777	1	0.999631	0.878941
Bscl2_Q9Z2E9_S280s_1	0.41	2.88	5.49	1.36	3	3.22	5.49	2.88	3.72	1.06	5.85	6.79	4.98	0.17	4.29	0.6	1.1125	1.82	-0.025	0.319788	0.224544	0.985718	1	0.999631	0.995133
Bsg_K3W4Q8_S201s_1	-0.44	1.72	1.42	1.38	-0.78	2.05	2.49	-0.17	0.29	0.92	-0.18	1.18	0.51	-0.1	1.19	0.28	-0.1225	-0.4675	-0.55	0.881736	0.396347	0.311934	1	0.999631	0.719361
Bsg_K3W4Q8_T203t_1	0.61	-4.96	0.48	-0.45	-4.6	-6.52	-0.46	0.15	-7.15	-2.07	-0.11	0.27	-6.51	-7.13	0.89	0.69	-1.7775	-1.185	-1.935	0.325502	0.520653	0.375244	1	0.999631	0.748001
Bsn_O88737_S105s_1	-0.54	-0.99	0.23	-0.05	-1.14	-0.7	0.53	-0.08	-1.23	-1.72	0.32	-0.6	-1.29	-1.98	-0.42	-1.3	-0.01	-0.47	-0.91	0.981888	0.351164	0.0554741	1	0.999631	0.494338
Bsn_O88737_S1100s_1	-1.04	-0.45	-0.99	-2.52	-1.56	-0.55	-2.21	-1.8	-1.42	-0.92	-1.78	-1.55	0.53	-0.97	-1.19	-1.31	-0.28	-0.1675	0.515	0.596823	0.719519	0.375323	1	0.999631	0.748013
Bsn_O88737_S1108s_1	-0.76	0.03	-0.8	-2.05	-0.15	0.09	-1.89	-1.63	-0.85	-0.41	-1.27	-1.3	0.44	0.17	-1.43	-0.9	0	-0.0625	0.465	1	0.892807	0.421461	1	0.999631	0.772817
Bsn_O88737_S1114s_1	-1.59	-0.36	-1.78	-3.06	-0.94	-1.74	-2.67	-3	-1.6	-1.03	-2.14	-2.12	-0.67	-0.95	-2.43	-1.97	-0.39	-0.025	0.1925	0.549879	0.964608	0.758545	1	0.999631	0.914449
Bsn_O88737_S1137s_1	-0.62	0.79	-0.46	-0.12	0.58	0.09	-0.36	-0.58	0.45	0.52	-0.05	-0.2	0.7	0.82	-0.37	-0.35	0.035	0.2825	0.3025	0.931536	0.467458	0.507084	1	0.999631	0.81564
Bsn_O88737_S1173s_1	-1.57	-1.42	-1.52	-0.9	-0.35	-1.51	-0.94	-1.01	-1.04	-1.82	-1.3	-1.03	-1.13	-1.31	-1.19	-1.19	0.4	0.055	0.1475	0.239115	0.858778	0.607843	1	0.999631	0.858527
Bsn_O88737_S121s_1	1.3	-0.4	0.5	0.71	-0.26	0.32	1.2	0.88	0.16	0.96	0.45	-0.16	-1.8	-1	0.44	-0.34	0.0075	-0.175	-1.2025	0.986929	0.682461	0.050785	1	0.999631	0.489558
Bsn_O88737_S1236s_1	-0.96	-0.29	1.72	0.42	0.54	-0.77	0.92	-0.32	-0.32	-1.3	0.3	0.01	-1.12	-2.17	-0.34	-0.3	-0.13	-0.55	-1.205	0.83438	0.377145	0.0872204	1	0.999631	0.553514
Bsn_O88737_S1369s_1	-0.44	-0.91	0.53	-0.27	1.26	-0.36	1.94	1.27	0.53	-2.82	1.99	1.65	0.28	-1.64	0.94	-0.09	1.3	0.61	0.145	0.0325658	0.539218	0.800862	1	0.999631	0.931985
Bsn_O88737_S1370s_1	-0.79	1.17	0.13	-0.58	3.09	0.82	1.26	0.43	2.72	-1.21	0.4	0.98	0.97	0.08	0.35	0.14	1.4175	0.74	0.4025	0.0532114	0.371623	0.405378	1	0.999631	0.765965
Bsn_O88737_S138s_2	2.76	0.34	-0.01	1.19	1.75	0.53	2.21	0.07	0.52	0.42	-0.14	-0.26	-0.07	-0.25	-0.14	-1.16	0.07	-0.935	-1.475	0.920726	0.138171	0.0332127	1	0.999631	0.44294
Bsn_O88737_S1407s_1	0.77	-0.77	-1.36	-0.03	1.38	0.02	0.44	0.05	-0.3	-1.8	0.16	-1.51	-2.19	-0.62	-0.9	-1.28	0.82	-0.515	-0.9	0.138939	0.400355	0.118338	1	0.999631	0.585395
Bsn_O88737_S142s_1	1.45	-0.65	0.82	0.48	1.05	0.71	0.82	-0.62	0.56	0.2	-0.03	-0.94	-2.42	-0.05	-0.24	-0.13	-0.035	-0.5775	-1.235	0.947774	0.276211	0.0806154	1	0.999631	0.545579
Bsn_O88737_S142s_2	2.76	0.34	-0.01	1.19	1.75	0.53	2.21	0.07	0.52	0.42	-0.14	-0.26	-0.07	-0.25	-0.14	-1.16	0.07	-0.935	-1.475	0.920726	0.138171	0.0332127	1	0.999631	0.44294
Bsn_O88737_S1460s_1	0.04	-1.2	-1.24	-0.32	0.03	-0.71	-0.91	-0.79	-0.96	-0.99	-0.88	-1.16	-0.41	-0.2	-0.5	-1.1	0.085	-0.3175	0.1275	0.828486	0.3869	0.749771	1	0.999631	0.912137
Bsn_O88737_S1482s_1	-1.59	-0.54	-0.7	-1.67	-1.18	-1.37	-1.46	-1.46	-1.12	-0.86	-1.34	-0.86	0.33	-0.96	-0.75	-0.78	-0.2425	0.08	0.585	0.478704	0.820893	0.19043	1	0.999631	0.648674
Bsn_O88737_S151s_1	1.49	-0.93	-0.6	1.53	2.17	0.4	1.19	1.18	-0.08	-0.6	-0.17	-0.46	-0.77	0.19	0.7	-0.39	0.8625	-0.7	-0.44	0.217746	0.267814	0.508672	1	0.999631	0.816932
Bsn_O88737_S1650s_1	1.53	-0.88	-0.28	0.67	1.14	0.29	0.54	0.79	-0.56	-0.55	0.35	0.33	0.14	-0.08	0.5	-0.56	0.43	-0.3675	-0.26	0.417051	0.50687	0.630746	1	0.999631	0.867509
Bsn_O88737_S1990s_1	-1.09	0.26	-0.23	0.22	0.09	-0.16	-0.6	-0.42	-0.62	-1.25	-0.75	-0.26	-0.53	-0.39	0.16	-0.05	-0.0625	-0.51	0.0075	0.865031	0.212467	0.984424	1	0.999631	0.995133
Bsn_O88737_S2046s_1	-0.1	-0.08	-0.45	0.22	0.42	0.11	-0.04	0.29	-0.12	-0.42	-0.14	0.11	-0.29	0.22	0.16	0.24	0.2975	-0.04	0.185	0.280279	0.884912	0.536569	1	0.999631	0.830094
Bsn_O88737_S241s_1	1.45	-2.19	-2.55	1.34	1.26	-0.68	1.26	0.65	-0.78	-0.64	-1.06	-2.22	-3.49	-1.56	-1.38	-0.66	1.11	-0.6875	-1.285	0.289734	0.493432	0.243697	1	0.999631	0.685637
Bsn_O88737_S245s_1	0.52	-1.3	-1.82	0.59	0.97	0.25	0.72	0.74	0.04	-0.81	0.38	-0.9	-2.9	0	-0.23	-0.27	1.1725	0.18	-0.3475	0.067035	0.77499	0.667422	1	0.999631	0.88264
Bsn_O88737_S2578s_1	-0.3	1.19	1.7	0.94	0.56	1.3	0.52	1.07	0.83	0.43	1.88	1.1	1.55	0.58	2.01	1.41	-0.02	0.1775	0.505	0.964543	0.721894	0.323172	1	0.999631	0.724485
Bsn_O88737_S2659s_1	1.22	-0.05	-1.16	-0.7	-0.34	-0.85	-0.15	-1.89	-0.92	-1.08	-2.43	-0.99	-1.91	-1.98	-2.91	-1.38	-0.635	-1.1825	-1.8725	0.294518	0.0644776	0.00721677	1	0.999631	0.358173
Bsn_O88737_S2805s_1	1.14	-0.45	0.48	0.52	1.2	0.01	0.85	0.91	-0.5	-0.66	0.04	-0.6	0.01	0.88	-0.35	-0.96	0.32	-0.8525	-0.5275	0.44686	0.0483268	0.29429	1	0.999631	0.708293
Bsn_O88737_S2808s_1	0.98	2.46	0.17	-0.72	1.08	0.5	-0.1	0.57	-1.12	-0.5	-0.26	-1.56	-1.07	-0.4	-0.78	0.27	-0.21	-1.5825	-1.2175	0.743931	0.0359665	0.088542	1	0.999631	0.553858
Bsn_O88737_S2811s_1	-0.63	-1.11	-0.22	-0.26	0.76	0.15	-0.27	0.18	0.07	-0.45	-0.4	-0.44	0	-1.11	-0.16	0.02	0.76	0.25	0.2425	0.0438204	0.427545	0.524754	1	0.999631	0.822727
Bsn_O88737_S2822s_1	0.85	-0.2	-1.39	-0.17	1.98	-0.41	1.09	-0.59	0.57	-2.2	-0.15	-0.66	-0.66	-1.47	-0.82	-1.68	0.745	-0.3825	-0.93	0.289488	0.569658	0.0864276	1	0.999631	0.55299
Bsn_O88737_S284s_1	1.27	0.47	-0.3	0.68	1.07	0.77	0.28	1.28	0.01	-0.82	0.23	-1.02	-1.09	0.1	0.16	0.04	0.32	-0.93	-0.7275	0.427316	0.0580574	0.12448	1	0.999631	0.596063
Bsn_O88737_S2858s_1	-1.14	-0.64	-1.25	-2.38	-1.43	-1.23	-1.15	-1.53	-0.99	-1.2	-1.54	-2	-0.13	-0.9	-1.69	-1.33	0.0175	-0.08	0.34	0.963954	0.851872	0.486561	1	0.999631	0.804772
Bsn_O88737_S2860s_1	-1.28	-1.03	-0.26	-1.2	-1.46	-1.15	-1.5	-1.08	-1.16	-0.91	-1.1	0.03	0.25	-0.64	-0.54	-0.04	-0.355	0.1575	0.7	0.270156	0.681981	0.0770577	1	0.999631	0.542683
Bsn_O88737_S2866s_1	0.19	0.15	0.88	0.67	0.15	0.92	0.38	0.25	0.22	0.56	0.04	0.27	0.13	0.89	0.42	0.77	-0.0475	-0.2	0.08	0.876841	0.500059	0.806594	1	0.999631	0.935434
Bsn_O88737_S2908s_1	-1.27	-0.79	-0.67	-1.17	-0.99	-1.16	-0.84	-1.18	-1.01	-1.24	-0.86	-0.69	0.13	-1.07	-0.92	-0.66	-0.0675	0.025	0.345	0.798836	0.929199	0.344755	1	0.999631	0.734195
Bsn_O88737_S301s_1	1.16	-0.38	-1.84	1.06	2.01	0.05	0.98	0.7	0.05	-0.44	0.81	-1.24	-1.18	0.08	-0.51	-0.51	0.935	-0.205	-0.53	0.21411	0.780008	0.437398	1	0.999631	0.781057
Bsn_O88737_S3022s_1	-1.35	-0.1	-0.25	-0.06	0.15	-0.09	-0.42	-0.25	-0.29	-1.04	-0.11	-0.26	-0.44	-0.02	-0.23	0.07	0.2875	0.015	0.285	0.426666	0.969169	0.447758	1	0.999631	0.786228
Bsn_O88737_S3158s_1	0.9	-0.18	-0.21	1.08	1.16	0.79	0.46	0.65	0.28	-0.47	0.51	-0.1	0.45	0.12	-0.31	0.14	0.3675	-0.3425	-0.2975	0.352062	0.415181	0.464916	1	0.999631	0.794369
Bsn_O88737_S3218s_1	-0.71	-1.45	-1.82	-1.36	-1.87	-1.22	-1.07	-1.64	-2.44	-1.76	-0.98	-1.75	-2.93	-2.02	-2.64	-1.04	-0.115	-0.3975	-0.8225	0.731536	0.324959	0.103534	1	0.999631	0.567302
Bsn_O88737_S3258s_1	-0.07	-0.79	0.44	0.4	-1.49	-1.23	0.33	-0.01	-1.19	-0.21	-1.11	-1.06	-1.33	-2.02	-1.39	-1.11	-0.595	-0.8875	-1.4575	0.250209	0.0419423	0.00322769	1	0.999631	0.351308
Bsn_O88737_S3301s_1	-0.79	-0.58	-0.46	-0.2	-0.71	-0.83	-0.49	-0.58	-0.83	-0.54	-0.59	-0.55	-0.92	-1.16	-1.28	-0.54	-0.145	-0.12	-0.4675	0.573725	0.649294	0.147833	1	0.999631	0.620569
Bsn_O88737_S3382s_1	0.41	1.12	1.08	0.75	0.59	1.46	0.22	1.01	0.51	0.71	0.75	0.72	0.75	1.26	0.99	1.54	-0.02	-0.1675	0.295	0.953886	0.548142	0.36794	1	0.999631	0.745968
Bsn_O88737_S3460s_1	0.3	-0.62	-0.77	1.61	1.8	1.39	1.87	0.76	1.07	-0.85	0.62	-0.13	-1.91	-1.16	0.43	-1.52	1.325	0.0475	-1.17	0.0357804	0.939411	0.105082	1	0.999631	0.568213
Bsn_O88737_S3466s_1	3.14	-0.56	-0.76	1.39	0.71	0.28	1.41	-0.75	-0.48	0.92	-0.58	-1.62	-2.61	-0.75	-0.83	-0.91	-0.39	-1.2425	-2.0775	0.661405	0.196415	0.0375832	1	0.999631	0.458256
Bsn_O88737_S3512s_1	-1.55	-0.51	-2.18	-2.92	-1.85	-1.55	-2.67	-3.08	-1.34	-0.62	-2.47	-2.66	0.4	-1.16	-3.04	-2.23	-0.4975	0.0175	0.2825	0.390044	0.977952	0.720446	1	0.999631	0.904869
Bsn_O88737_S3512s_2	-0.55	0.14	-0.5	-0.61	0.3	-0.4	-0.7	-0.05	-0.26	-0.78	-0.54	0.02	0.11	-0.26	-0.61	-0.13	0.1675	-0.01	0.1575	0.607253	0.974407	0.621342	1	0.999631	0.861888
Bsn_O88737_S3516s_1	-7.15	-9.04	-4.12	-4.56	-9.66	-7.32	-3.92	-5.37	-8.71	-6.51	-3.63	-4.1	-3.22	-6.37	-5.33	-5.5	-0.35	0.48	1.1125	0.808122	0.732768	0.337812	1	0.999631	0.730926
Bsn_O88737_S3516s_2	-1.79	-1.97	-0.17	-1.5	-2.67	-2.19	-1.16	-1.16	-2.52	-2.28	0.24	0.33	0.16	-0.97	-1.35	-1.34	-0.4375	0.3	0.4825	0.407003	0.698761	0.358611	1	0.999631	0.741182
Bsn_O88737_S3519s_1	-1.51	-1.23	-1.29	-1.63	-1.35	-0.3	-1.7	-1.04	-1.05	-0.71	-1.51	-1.5	0.03	0.57	-0.83	-1.15	0.3175	0.2225	1.07	0.367882	0.458163	0.0267417	1	0.999631	0.422285
Bsn_O88737_S3519s_2	-0.86	-0.42	-0.48	-1.07	-0.33	-0.77	-1.09	-1.17	-0.74	-1.15	0.01	0.16	-0.08	-0.56	-1.11	-1.38	-0.1325	0.2775	-0.075	0.665368	0.463476	0.839827	1	0.999631	0.946365
Bsn_O88737_S3545s_1	-1.09	-1.23	-0.79	-0.54	-0.06	-0.5	-0.3	-0.48	-0.28	-1.52	-1.26	-0.61	-1.6	-0.31	-0.99	-0.45	0.5775	-0.005	0.075	0.0575056	0.988874	0.840558	1	0.999631	0.946805
Bsn_O88737_S3730s_1	2.47	1.48	0.16	0.49	0.51	2.54	0.96	1.66	0.3	1.87	-0.04	-0.34	-0.77	0.85	1.97	-1.02	0.2675	-0.7025	-0.8925	0.665378	0.291746	0.262002	1	0.999631	0.692758
Bsn_O88737_S435s_1	2.4	-1.31	0.04	0.32	-1.58	2.5	3.38	-1.91	-1.92	1.45	-1.18	-0.45	-1.92	-1.58	-0.07	-0.71	0.235	-0.8875	-1.4325	0.859969	0.34446	0.0856055	1	0.999631	0.551124
Bsn_O88737_S572s_1	2.36	-0.79	0.15	0.83	-3.59	0.51	3.06	-1.06	-5.07	0.55	-2.68	-1.81	-2.5	-1.77	0.13	-1.2	-0.9075	-2.89	-1.9725	0.49522	0.029023	0.0249249	1	0.999631	0.418003
Bsn_O88737_S817s_1	0.26	-0.16	-0.24	-0.81	0.56	1.29	-0.24	-1.83	0.24	0.74	0.12	-0.3	1.11	1.65	-0.99	-0.57	0.1825	0.4375	0.5375	0.772893	0.227354	0.39023	1	0.999631	0.758901
Bsn_O88737_S90s_1	2.89	-0.86	-0.86	2.1	1.21	1.88	3.38	1.29	0.22	-0.07	0.62	-0.65	-3.58	0.26	0.81	0.01	1.1225	-0.7875	-1.4425	0.255519	0.384019	0.24173	1	0.999631	0.684831
Bsn_O88737_T2595t_1	-0.19	-0.03	4.85	3.41	0.03	-1.05	3.17	3.39	-0.19	-0.78	5.88	5.96	-0.35	-1.51	3.17	4.18	-0.625	0.7075	-0.6375	0.663229	0.709863	0.683464	1	0.999631	0.889602
Bsn_O88737_T3254t_1	0.35	3.02	3.25	1.32	2.87	2.87	3.42	2.07	2.5	-1.4	3.29	2.42	1.36	0.13	2.13	0.54	0.8225	-0.2825	-0.945	0.235407	0.794658	0.213268	1	0.999631	0.666787
Bsn_O88737_T3896t_1	0.25	0.16	-0.42	0.07	0.66	-0.08	0.03	0.12	0.2	-0.35	-0.38	0.67	0.26	0.7	0.9	0.87	0.1675	0.02	0.6675	0.569571	0.952806	0.0513088	1	0.999631	0.489777
Bsn_O88737_T55t_1	0.55	-0.78	-0.83	0.73	0.63	-0.48	0.61	0.58	-0.98	-1.2	0.19	-1.51	0.21	-0.46	-0.24	-0.31	0.4175	-0.7925	-0.1175	0.388931	0.15433	0.7917	1	0.999631	0.926882
Btbd10_E9Q6L8_S44s_1	1.49	0.11	0.95	0.61	-0.18	0.07	0.61	0.11	-0.39	1.06	0.37	-0.16	-0.74	-0.21	0.12	-0.46	-0.6375	-0.57	-1.1125	0.100244	0.207546	0.0140305	1	0.999631	0.385092
Btbd10_E9Q6L8_S71s_1	0.05	-1.24	0.35	0.42	-0.65	-1.1	0.53	-0.72	-0.17	0.66	-0.59	-0.33	-0.69	-1.94	0.27	-1.14	-0.38	-0.0025	-0.77	0.447526	0.995654	0.188541	1	0.999631	0.647893
Btbd9_Q8C726_T578t_1	-0.56	1.33	-0.44	0.46	1.19	1.57	-0.63	0.93	1.09	-0.76	-0.55	-0.2	1.1	0.17	-0.81	0.19	0.5675	-0.3025	-0.035	0.349779	0.591155	0.949047	1	0.999631	0.983587
Bzw1_Q9CQC6_S411s_1	-0.21	0.09	1.91	0.49	-1.23	0.09	0.79	-0.46	-0.08	0.16	0.24	0.98	-0.99	-0.84	0.64	-0.3	-0.7725	-0.245	-0.9425	0.201606	0.623557	0.113225	1	0.999631	0.577412
Bzw1_Q9CQC6_S413s_1	0.07	-0.5	2.75	0.34	-0.02	1.34	0.03	1.21	1.61	1.69	0.41	1.19	0.52	1.5	1.04	-0.47	-0.025	0.56	-0.0175	0.971941	0.425593	0.980937	1	0.999631	0.994608
C0HKD9_S94s_1	0.37	1.56	2.13	1.24	0.48	1.89	1.05	1.63	1.24	1.09	1.17	0.89	1.15	1.63	1.72	1.65	-0.0625	-0.2275	0.2125	0.892622	0.564797	0.606027	1	0.999631	0.85817
C2cd2_E9Q3C1_S436s_1	-0.26	0.38	0.33	-0.4	-0.42	0.02	-0.4	0.29	0.14	0.43	0.16	0	0.79	0.6	0.39	0.48	-0.14	0.17	0.5525	0.658562	0.571268	0.0997425	1	0.999631	0.562805
C2cd2l_Q80X80_S374s_1	-2.38	-0.21	-0.65	-1.98	-0.37	-0.98	-1.03	-1.18	-0.4	-2.39	-0.21	-0.12	0.57	-1.17	-0.29	-1.83	0.415	0.525	0.625	0.42577	0.441352	0.354648	1	0.999631	0.739951
C2cd2l_Q80X80_S396s_1	-0.88	-1.47	-1.97	-1.66	-1.58	-1.82	-1.34	-1.89	-1.8	-1.17	-2.07	-1.79	-0.95	-1.28	-1.6	-1.21	-0.1625	-0.2125	0.235	0.606918	0.538807	0.488528	1	0.999631	0.806721
C2cd2l_Q80X80_S411s_1	-0.64	-1.03	-0.75	-0.97	-0.92	-1.32	-1	-0.85	-1.16	-0.82	-1.13	-0.62	-0.26	-0.58	-0.55	-0.58	-0.175	-0.085	0.355	0.495493	0.752969	0.21232	1	0.999631	0.666473
C2cd2l_Q80X80_S468s_1	-1.47	-5.51	-4.92	-5.78	-2.99	-5.36	-5.56	-6.05	-3.9	-2.02	-4.75	-6.86	-3.24	-4.5	-5.69	-5.59	-0.57	0.0375	-0.335	0.586138	0.975297	0.734562	1	0.999631	0.907462
C2cd2l_Q80X80_S48s_2	-0.69	-0.61	-0.91	0.19	-0.42	-1.67	-0.38	-0.91	-0.96	-0.81	-0.42	0.21	-0.2	-1.04	-1.65	-0.69	-0.34	0.01	-0.39	0.395517	0.978878	0.35058	1	0.999631	0.737333
C2cd2l_Q80X80_S59s_1	-0.73	-1.76	-0.31	-1.9	-1.69	-1.88	-1.73	-2.28	-1.73	-0.59	-2.04	-1.59	1.14	-1.04	-1.92	-2.87	-0.72	-0.3125	0.0025	0.104802	0.519379	0.997559	1	0.999631	0.99922
C2cd2l_Q80X80_S613s_1	-0.72	0.12	-0.16	-1.51	0.29	-0.25	-1.35	-2.01	-0.78	-0.95	-0.65	-0.08	1.23	-0.13	-0.41	-0.62	-0.2625	-0.0475	0.585	0.650045	0.908296	0.276368	1	0.999631	0.700187
C2cd2l_Q80X80_S619s_1	-1.16	0.02	1.2	-0.61	-0.71	-0.77	-1.04	0.06	-0.78	-0.59	1.02	-2.39	2.11	-0.08	0.5	1.43	-0.4775	-0.5475	1.1275	0.368779	0.477539	0.099334	1	0.999631	0.562298
C2cd2l_Q80X80_S623s_1	-1.83	-0.52	0.34	-0.72	-1.02	-0.9	-0.79	-0.28	-0.64	-0.25	0.37	0.71	1.55	-0.05	0.57	0.82	-0.065	0.73	1.405	0.886803	0.174328	0.0216522	1	0.999631	0.405544
C2cd2l_Q80X80_S660s_1	-2.02	-0.79	-0.4	-0.03	-0.5	-1.14	-0.3	0.63	-1.25	-1.66	0.27	-0.84	-0.76	-0.95	-0.21	-0.14	0.4825	-0.06	0.295	0.368766	0.91377	0.532317	1	0.999631	0.8277
C2cd2l_Q80X80_S662s_1	-1.68	-0.89	-0.89	0.36	-0.72	-1.2	-0.19	0.07	-1.05	-1.45	-0.57	-0.39	-0.2	-0.84	-0.25	-0.18	0.265	-0.09	0.4075	0.584447	0.847847	0.374852	1	0.999631	0.74795
C2cd2l_Q80X80_T388t_1	-0.07	0.13	0.51	0.4	0.88	1.87	0.12	0.8	1.2	0.67	0.3	0.16	0.36	1.1	1.03	0.29	0.675	0.34	0.4525	0.109581	0.307666	0.188111	1	0.999631	0.647379
C2cd2l_Q80X80_T417t_1	-1.6	-2.26	-3.18	-3.81	-2.73	-3.12	-3.58	-3.62	-2.66	-1.92	-2.55	-3.7	-0.98	-2.27	-3.65	-4.4	-0.55	0.005	-0.1125	0.285979	0.992924	0.886249	1	0.999631	0.963505
C2cd2l_Q80X80_T417t_2	-1.21	-2.75	-1.14	0.5	-1.13	-3.24	-0.62	0.83	-2.07	-2.69	-0.7	-0.23	-1.71	-2.17	0.54	0.08	0.11	-0.2725	0.335	0.90546	0.725274	0.682534	1	0.999631	0.889581
C2cd2l_Q80X80_T428t_1	0.52	-1.61	-0.15	0.63	-0.22	-0.66	0.47	0.64	0.16	-0.23	-0.54	-0.19	-0.76	-0.09	0.13	0.14	0.21	-0.0475	0.0075	0.702967	0.925148	0.988598	1	0.999631	0.995409
C2cd2l_Q80X80_T428t_2	-1.21	-2.75	-0.97	0.65	-1.13	-3.24	0.21	0.72	-2.07	-2.69	0.38	-0.24	-1.71	-2.17	-0.5	-0.03	0.21	-0.085	-0.0325	0.82856	0.92283	0.965549	1	0.999631	0.988053
C2cd4cC2CD4 family_Q5HZI2_S153s_1	-0.44	0.83	0.08	0.75	1.68	0.52	1.46	2.11	0.8	0	1.57	-0.44	-0.09	0.65	0.04	1.74	1.1375	0.1775	0.28	0.0255968	0.726742	0.574019	1	0.999631	0.84468
C2cd4cC2CD4 family_Q5HZI2_S175s_1	1.37	0.04	-1.33	-0.79	1.58	0.3	0.49	0.58	0.31	-0.68	-1.29	-1.79	-0.68	-0.28	-1.48	-1.27	0.915	-0.685	-0.75	0.146175	0.316512	0.224647	1	0.999631	0.67471
C2cd4cC2CD4 family_Q5HZI2_S203s_1	2.43	-2	-2.19	0.96	2.73	-1.32	1.39	0.69	-0.27	-3.69	-0.07	-1.58	-2.21	-1.58	-1.22	-2.81	1.0725	-1.2025	-1.755	0.384315	0.331252	0.1081	1	0.999631	0.569498
C2cd4cC2CD4 family_Q5HZI2_S205s_1	0.99	-2	-0.8	1.32	1.67	-0.82	1.87	0.94	-0.72	-1.9	0.38	-1.09	-2.2	-1.03	-0.91	-1.55	1.0375	-0.71	-1.3	0.246112	0.385352	0.101057	1	0.999631	0.564448
C2cd4cC2CD4 family_Q5HZI2_S259s_1	0.43	0.63	1.8	1.46	0.02	0.42	1.21	0.79	1.82	1.37	-0.13	2.67	1.72	0.68	2.38	2.23	-0.47	0.3525	0.6725	0.271913	0.56682	0.189025	1	0.999631	0.648465
C2cd4cC2CD4 family_Q5HZI2_T282t_1	1.81	-1.41	-1.67	1.06	1.66	-0.93	1.09	0.58	-0.14	-1.16	0.3	-1.25	-0.94	-1.06	-1.11	-0.44	0.6525	-0.51	-0.835	0.472993	0.544857	0.29649	1	0.999631	0.709528
C2cd5_E9Q026_S295s_1	-1.08	-0.67	-0.86	-0.93	-0.65	-1.64	-0.91	-0.45	-0.71	-2.24	-0.3	-0.31	-1.62	-0.23	-0.26	-1.13	-0.0275	-0.005	0.075	0.931693	0.991254	0.845563	1	0.999631	0.948565
C2cd5_Q7TPS5_S284s_1	-0.7	1.29	0.6	0.52	0.49	0.88	-0.08	-0.5	1.22	0.16	1.08	0.33	2.17	1.02	0.26	0.16	-0.23	0.27	0.475	0.63747	0.571859	0.415188	1	0.999631	0.769452
C2cd5_Q7TPS5_T330t_1	1.41	1.01	0.49	1.68	1	1.87	1.42	1.64	0.17	1.09	0.88	0.31	-1.89	1.27	0.12	0.22	0.335	-0.535	-1.2175	0.348186	0.169387	0.0805516	1	0.999631	0.545579
C2cd5_Q7TPS5_T809t_1	-0.5	-0.91	-1.2	-0.74	-0.58	-1.01	-0.73	-1.5	-0.74	-1.33	-1.1	-1.51	-0.61	-0.79	-0.69	-0.85	-0.1175	-0.3325	0.1025	0.703241	0.282011	0.719661	1	0.999631	0.904782
C530008M17Rik_E9Q5L4_S1076s_1	-0.36	0.06	-0.89	-1.19	-0.1	-0.84	-0.67	-1.12	0	-0.72	-0.5	-0.51	0.05	-0.32	-0.46	-1.04	-0.0875	0.1625	0.1525	0.813124	0.647748	0.696041	1	0.999631	0.895683
C530008M17Rik_E9Q5L4_S1100s_1	-0.41	-0.55	0.55	-0.51	-0.96	-0.78	-0.24	-0.15	-0.88	-0.19	-0.22	-0.38	-0.47	-0.43	0.57	0.44	-0.3025	-0.1875	0.2575	0.4035	0.592113	0.527594	1	0.999631	0.824554
C530008M17Rik_E9Q5L4_S1259s_1	0.37	0.46	-0.82	0.57	0.67	0.43	0.45	0.71	0.74	0	0.49	0.88	0.66	1.04	1.34	0.85	0.42	0.3825	0.8275	0.257205	0.342862	0.0544712	1	0.999631	0.491994
C530008M17Rik_E9Q5L4_S571s_1	0.48	-0.97	0.85	0.86	-1.27	-0.59	0.87	0.26	-0.58	0.43	-0.73	-0.4	-1.27	-2.02	-1.13	-0.83	-0.4875	-0.625	-1.6175	0.410437	0.216586	0.00727926	1	0.999631	0.358173
C530008M17Rik_E9Q5L4_S730s_1	-0.42	0.69	-1.2	-1.23	-1.32	0.83	-1.23	-0.15	0.83	0.23	-0.53	-0.99	-0.35	0.48	0.37	0.72	0.0725	0.425	0.845	0.905584	0.453752	0.10811	1	0.999631	0.569498
C530008M17Rik_E9Q5L4_S867s_1	-0.28	-0.06	0.38	-0.46	0.17	0.93	-0.01	1	0.22	-0.75	0.1	0.17	-0.02	0.41	0.98	1.06	0.6275	0.04	0.7125	0.0951867	0.905981	0.0720194	1	0.999631	0.532005
C530008M17Rik_E9Q5L4_T1033t_1	-0.71	-0.14	0.08	-0.74	-0.01	0.03	-0.39	-0.83	-0.65	0.31	-0.82	-0.14	0.28	0.77	-0.32	0.26	0.0775	0.0525	0.625	0.813975	0.884397	0.103361	1	0.999631	0.566655
C78339_Q3URQ4_T70t_1	2.34	-2.74	0.96	0.7	0.16	1.41	0.77	0.47	-1.73	3.11	0.49	-0.16	-1.43	1.82	0.34	0.2	0.3875	0.1125	-0.0825	0.687308	0.928945	0.939003	1	0.999631	0.980404
Cables1_Q3U148_T376t_1	-0.4	-1.22	0.27	0.93	-0.51	-0.16	-0.05	1.43	-0.3	-0.53	-0.25	0.02	-0.08	-2.03	0.59	1.15	0.2825	-0.16	0.0125	0.624025	0.729167	0.98638	1	0.999631	0.995135
Cables2_Q8K3M5_S103s_1	-0.24	-0.56	0.53	0.26	-0.55	-0.81	-0.67	-0.79	-0.63	-0.76	-0.11	-0.08	-0.46	-0.33	0.29	0.17	-0.7025	-0.3925	-0.08	0.0435047	0.270427	0.823166	1	0.999631	0.938864
Cabp1_D3Z1M4_S101s_1	-0.08	0.84	0.49	0.53	0.56	0.44	-0.29	0.61	0.25	0.52	0.54	0.9	0.8	0.73	0.39	0.78	-0.115	0.1075	0.23	0.725998	0.725375	0.463436	1	0.999631	0.793615
Cachd1_Z4YK18_S1169s_1	-1.55	-5.96	-4.4	-3.56	-4.51	-5.1	-2.7	-6.64	-6.21	-4.2	-4.16	-4.77	-4.55	-4.48	-5.52	-5.04	-0.87	-0.9675	-1.03	0.41725	0.297624	0.230576	1	0.999631	0.681463
Cacna1a_E9Q1R5_S1899s_1	-1.4	-1.13	-1.12	-1.08	-1.17	-1.45	-1.36	-1	-1.36	-1.34	-1.18	-0.82	-0.42	-1.1	-1.17	-1.04	-0.0625	0.0075	0.25	0.801516	0.977325	0.409005	1	0.999631	0.766996
Cacna1a_E9Q1R5_S1934s_1	0.67	0.52	-0.2	1.12	1.02	0.08	0.38	1.07	0.41	-0.12	0.36	0.19	-0.51	0.68	0.53	0.77	0.11	-0.3175	-0.16	0.772529	0.36523	0.702917	1	0.999631	0.896857
Cacna1a_E9Q1R5_S1951s_1	-0.93	-0.83	0.57	-0.33	-0.91	-0.81	-0.31	-0.24	-0.86	-2.5	0.18	0.26	0.58	-0.37	-0.25	0.34	-0.1875	-0.35	0.455	0.633628	0.595491	0.297329	1	0.999631	0.710672
Cacna1a_E9Q1R5_S1969s_1	0.49	-0.44	-0.48	0.4	-0.29	-0.48	-0.21	-0.31	-0.73	-0.26	-0.39	-0.32	-1.03	0.33	0.2	0.68	-0.315	-0.4175	0.0525	0.334116	0.228614	0.907671	1	0.999631	0.96989
Cacna1a_E9Q1R5_S1981s_1	-0.33	-0.3	0.07	-0.54	-0.61	-0.47	-0.45	-0.42	-0.57	-0.3	-0.2	-0.7	-0.38	0.19	-0.43	0.44	-0.2125	-0.1675	0.23	0.407473	0.546566	0.486443	1	0.999631	0.804724
Cacna1a_E9Q1R5_S2173s_1	-0.75	-0.75	0.57	-0.47	-1.07	-0.72	-0.41	-0.4	-2.11	-1.95	-1.54	-0.21	0.22	-3.01	-1.31	-1.68	-0.3	-1.1025	-1.095	0.425536	0.0511106	0.120164	1	0.999631	0.587703
Cacna1a_E9Q1R5_S2205s_1	0.1	-0.7	-0.12	-0.04	-0.02	0.4	-0.57	0	-0.37	-0.43	-0.45	0.18	-0.54	0.89	0.3	0.35	0.1425	-0.0775	0.44	0.654017	0.798987	0.263362	1	0.999631	0.693034
Cacna1a_E9Q1R5_S2226s_1	-0.82	-0.88	-0.39	-0.44	-1.17	-0.52	-0.37	-0.44	-1.05	-0.32	-0.65	-0.11	-0.22	-0.63	-0.23	-0.31	0.0075	0.1	0.285	0.979545	0.746969	0.331019	1	0.999631	0.727302
Cacna1a_E9Q1R5_S2256s_1	-0.11	0.47	0.34	-0.52	-0.25	0.69	-0.44	-0.31	-0.19	0.21	-0.19	-0.62	0.64	-0.02	-0.28	0.36	-0.1225	-0.2425	0.13	0.737526	0.472265	0.715947	1	0.999631	0.902765
Cacna1a_E9Q1R5_S705s_1	-0.41	-1.3	-1.7	-1.92	-0.91	-0.96	-1.72	-1.81	-1.3	-0.73	-1.71	-1.34	0.2	-0.77	-1.34	-1.27	-0.0175	0.0625	0.5375	0.96598	0.876267	0.273704	1	0.999631	0.700187
Cacna1a_E9Q1R5_S745s_1	-0.18	0.71	1.66	1.2	-0.08	0.51	0.45	1.07	0.73	0.59	0.76	1.54	1.22	0.47	1.06	1.79	-0.36	0.0575	0.2875	0.426306	0.89659	0.543562	1	0.999631	0.832881
Cacna1a_E9Q1R5_S820s_1	-0.6	-0.67	-0.67	-0.88	-0.94	-0.46	-1.34	-0.97	-0.97	-0.23	-0.78	-1.04	0.04	-0.28	-1.15	-0.41	-0.2225	-0.05	0.255	0.428074	0.86066	0.44871	1	0.999631	0.786796
Cacna1a_E9Q1R5_T1888t_1	-0.78	-0.17	-0.66	-0.79	-0.09	-0.23	-0.78	-0.42	-0.21	-0.29	-0.99	-0.35	0.01	-0.05	-0.48	-0.5	0.22	0.14	0.345	0.447808	0.646804	0.270241	1	0.999631	0.698438
Cacna1a_E9Q1R5_T986t_1	-1.35	-0.72	-1.5	-1.47	-0.61	-1.28	-1.64	-1.34	-1.71	-1.51	-1.34	-0.98	-0.27	-1.21	-0.89	-0.29	0.0425	-0.125	0.595	0.896615	0.686432	0.114455	1	0.999631	0.579001
Cacna1b_O55017_S1907s_1	-0.18	0.4	0.3	0.77	0.57	0.59	-0.04	1.02	0.44	-0.75	1.54	0.58	0.56	0.09	1.41	1.69	0.2125	0.13	0.615	0.527295	0.789469	0.17301	1	0.999631	0.642116
Cacna1b_O55017_S1929s_1	-0.01	0.41	-0.79	0.03	0.94	0.52	0.05	0.4	0.55	0.02	0.03	0.15	-0.13	0.5	0.1	0.16	0.5675	0.2775	0.2475	0.123717	0.411781	0.4787	1	0.999631	0.801051
Cacna1b_O55017_S1951s_1	-0.83	-0.07	-0.62	-0.79	-0.08	-0.58	-0.03	-1.03	0.02	-0.38	-0.15	0.35	0.67	-0.46	-0.33	-0.43	0.1475	0.5375	0.44	0.659262	0.102849	0.248091	1	0.999631	0.685751
Cacna1b_O55017_S2007s_1	-0.02	-1.05	-1.56	-0.22	0.03	-0.75	-0.12	-0.58	-0.74	-1	-0.69	-1.13	-1.34	-0.44	-0.37	-0.84	0.3575	-0.1775	-0.035	0.388649	0.651796	0.935259	1	0.999631	0.979194
Cacna1b_O55017_S2062s_1	-0.09	-0.21	-0.74	-0.42	0.38	-0.24	0.02	-0.37	-0.66	-1.18	-0.49	-0.88	0.59	-0.14	0.1	-0.53	0.3125	-0.4375	0.37	0.296002	0.156129	0.290745	1	0.999631	0.706164
Cacna1b_O55017_S2221s_1	1.3	1.8	0.3	1.15	1.94	1.78	0.55	1.01	2.03	0.99	0.91	1.13	0.32	1.66	0.97	1.14	0.1825	0.1275	-0.115	0.679513	0.757527	0.787774	1	0.999631	0.924613
Cacna1b_O55017_S2244s_1	-0.01	-0.14	-0.49	-0.1	0.03	-0.18	-0.53	-0.3	-0.16	0.08	-0.33	-0.26	0.21	0.25	-0.5	0.1	-0.06	0.0175	0.2	0.818357	0.946619	0.515754	1	0.999631	0.819449
Cacna1b_O55017_S424s_1	-0.69	1.28	0.49	0.4	1.92	1.03	0.58	1.05	2.06	-0.79	1.4	1.86	0.55	1.3	1.13	0.68	0.775	0.7625	0.545	0.123494	0.283238	0.237788	1	0.999631	0.683301
Cacna1b_O55017_S446s_1	-0.01	0.71	0	-0.77	1.35	0.57	-0.12	0.2	1.64	-0.6	-0.51	0.61	0.66	1.39	0.73	0.05	0.5175	0.3025	0.725	0.246376	0.593098	0.109202	1	0.999631	0.572424
Cacna1b_O55017_S745s_1	-1.04	-0.91	-0.17	-0.29	-1.57	-1.39	-0.4	-0.14	-0.82	-0.95	0.17	0.15	-0.31	-0.81	0.52	0.69	-0.2725	0.24	0.625	0.515976	0.542543	0.164297	1	0.999631	0.632578
Cacna1b_O55017_S770s_1	-0.32	-2.26	-1.03	-0.97	-1.68	-0.74	-0.83	-0.61	-1.7	-0.64	-0.96	-0.95	-0.27	-1.66	-1.18	-1.63	0.18	0.0825	-0.04	0.693172	0.855579	0.935867	1	0.999631	0.97939
Cacna1b_O55017_S773s_2	0.86	0.17	0.44	-0.07	-0.04	0.4	0.54	0.65	-0.23	0.55	-0.47	-0.41	-0.15	-0.07	0.48	-0.69	0.0375	-0.49	-0.4575	0.902892	0.181806	0.223599	1	0.999631	0.67471
Cacna1b_O55017_S783s_1	-0.6	0.64	0.19	-0.05	0.24	0.03	-0.64	0.15	0.55	0.41	-0.31	0.67	1.27	0.65	0.47	0.86	-0.1	0.285	0.7675	0.77767	0.445808	0.0550267	1	0.999631	0.492066
Cacna1b_O55017_S875s_1	-4.51	-4.73	-3.91	-3.42	-5.85	-4.56	-3.19	-0.48	-7.5	-4.34	-1.17	-3.66	-4.58	-5.78	-0.16	-1.69	0.6225	-0.025	1.09	0.545652	0.982583	0.344194	1	0.999631	0.733869
Cacna1b_O55017_S915s_1	0.17	-3.12	-1.32	-1.66	-3.45	-2.5	-0.66	-2.16	-3.62	-0.43	-2.42	-2.7	-2.79	-4.46	-2.19	-3.4	-0.71	-0.81	-1.7275	0.372474	0.343081	0.0374833	1	0.999631	0.458129
Cacna1b_O55017_T1935t_1	1.11	1.1	-0.07	2.2	2.08	1.06	1.81	1.08	1.23	-0.51	1.67	0.26	-1.08	0.54	0.08	1.01	0.4225	-0.4225	-0.9475	0.405303	0.495409	0.131958	1	0.999631	0.603456
Cacna1c_F7C376_S1825s_1	2.32	-1.33	0.56	-0.49	-1.67	-0.7	0.95	-0.81	-1.61	0.29	-1.11	-0.58	-1.89	-3.84	-1.21	-1.87	-0.8225	-1.0175	-2.4675	0.33655	0.211766	0.0141198	1	0.999631	0.385092
Cacna1c_F7C376_S2208s_1	1.15	-0.88	-1.88	0.74	1.21	-0.05	1.06	0.86	0.24	-0.37	0.19	-0.82	-1.32	0.13	-0.8	-0.5	0.9875	0.0275	-0.405	0.166921	0.967297	0.557213	1	0.999631	0.838305
Cacna1c_F7C376_S840s_1	-0.99	-1.13	-1.45	-1.54	-1.35	-1.52	-1.47	-1.35	-1.43	-0.93	-1.64	-1.88	-0.17	-1.14	-1.46	-1.5	-0.145	-0.1925	0.21	0.569833	0.537273	0.578836	1	0.999631	0.84629
Cacna1c_F7C376_S863s_1	-0.09	0.48	0.23	-0.15	-0.47	0.83	-0.16	-0.01	0.15	-0.22	-0.07	0.8	0.84	0.66	-0.35	0.36	-0.07	0.0475	0.26	0.839682	0.883664	0.469213	1	0.999631	0.796658
Cacna1c_F7C376_S863s_2	-0.28	1.01	0.21	-0.33	-0.15	0.3	-0.76	0.08	-0.18	0.7	-0.35	-0.3	0.16	0.47	-0.76	0.35	-0.285	-0.185	-0.0975	0.474527	0.650506	0.819626	1	0.999631	0.938303
Cacna1c_F7C376_T867t_2	-0.28	1.01	0.21	-0.33	-0.15	0.3	-0.76	0.08	-0.18	0.7	-0.35	-0.3	0.16	0.47	-0.76	0.35	-0.285	-0.185	-0.0975	0.474527	0.650506	0.819626	1	0.999631	0.938303
Cacna1d_Q99246_S1684s_1	0.76	-0.27	2.04	1.53	0.36	0.85	1.35	1.03	-0.31	1.06	0.21	0	-2.73	-0.4	-0.22	0.71	-0.1175	-0.775	-1.675	0.817067	0.174734	0.0528704	1	0.999631	0.489777
Cacna1e_Q61290_S1051s_1	-0.21	-0.5	-0.94	-0.69	-0.41	-0.7	-0.98	-0.75	-0.74	-0.74	-0.87	-0.6	-0.3	-0.5	-0.62	-0.57	-0.125	-0.1525	0.0875	0.65398	0.577585	0.763034	1	0.999631	0.915608
Cacna1e_Q61290_S1099s_1	-0.8	-0.08	0.15	-0.06	-0.39	-0.86	-0.13	-0.1	-0.93	-0.77	-0.09	-0.02	-0.3	-1.2	-0.12	-0.35	-0.1725	-0.255	-0.295	0.592574	0.472973	0.426282	1	0.999631	0.774781
Cacna1e_Q61290_S15s_1	1.92	-0.44	2.9	0.94	-0.99	1.33	3.55	0.16	-1.06	1.87	0.81	0.02	-0.42	-0.5	0.44	0.29	-0.3175	-0.92	-1.3775	0.759049	0.281545	0.0632531	1	0.999631	0.512978
Cacna1e_Q61290_S2054s_1	-1	0.75	0.97	-0.41	3.37	0.14	3.68	1.42	3.92	-0.88	4.99	5.37	2.36	-0.17	1.6	0.71	2.075	3.2725	1.0475	0.0307382	0.0287469	0.1298	1	0.999631	0.601246
Cacna1e_Q61290_S2073s_1	-0.65	-0.96	-0.95	-0.37	-0.55	-1.22	-0.44	-0.16	-0.77	-0.81	-0.27	-0.45	-0.9	-0.83	-0.65	-0.27	0.14	0.1575	0.07	0.659206	0.582103	0.816983	1	0.999631	0.937777
Cacna1e_Q61290_S2097s_1	-1.29	-0.97	-1.18	-0.65	-0.59	-0.92	-0.63	-0.34	-1.28	-1.33	0.96	0.47	-0.27	-0.79	-0.95	-0.96	0.4025	0.7275	0.28	0.163312	0.21499	0.375681	1	0.999631	0.748307
Cacna1e_Q61290_S2099s_1	0	0.37	-1.1	0.34	1.22	0.51	0.16	-0.69	0.49	-0.62	-0.12	-0.2	0.58	0.52	-0.03	0.42	0.3975	-0.015	0.47	0.429147	0.971344	0.253615	1	0.999631	0.688735
Cacna1e_Q61290_S20s_1	0.68	-1.49	1.17	-0.68	-2.6	-0.64	2.25	-1.59	-1.5	0.6	-2	-0.34	-1.48	-1.93	-0.98	-1.8	-0.565	-0.73	-1.4675	0.589459	0.341215	0.0304842	1	0.999631	0.438141
Cacna1e_Q61290_S737s_1	-0.85	-0.74	-0.74	-0.88	-0.55	-0.55	-0.89	-0.71	-0.61	-0.59	-0.79	-0.25	0.09	-0.34	-0.58	-0.39	0.1275	0.2425	0.4975	0.594196	0.352758	0.10086	1	0.999631	0.564448
Cacna1e_Q61290_S740s_1	-2.05	-1.86	-0.43	-0.99	-1.58	-1.77	-0.55	-0.28	-1.77	-1.37	-0.49	-1.16	-0.95	-1.92	-0.72	-0.71	0.2875	0.135	0.2575	0.56648	0.766478	0.58423	1	0.999631	0.849121
Cacna1e_Q61290_S793s_1	0	1.39	4.27	1.71	2.35	0.68	1.99	3.24	3.6	-0.03	4.27	5.19	3.78	0.17	4.3	3.25	0.2225	1.415	1.0325	0.804342	0.270003	0.35591	1	0.999631	0.74034
Cacna1e_Q61290_S794s_1	-0.44	3	2.74	0.26	3.55	1.23	2.88	1.52	5.03	-0.06	3.9	4.83	5.82	0.64	2.6	1.36	0.905	2.035	1.215	0.322979	0.130037	0.330121	1	0.999631	0.726892
Cacna1e_Q61290_S826s_1	-0.15	0.03	0.57	0.16	0.31	0.18	0.39	0.89	-0.38	-0.43	0.46	-0.22	-0.12	0.57	0.1	0.26	0.29	-0.295	0.05	0.329923	0.364258	0.870867	1	0.999631	0.958735
Cacna1e_Q61290_S852s_1	1.73	-2.19	-2.2	1.42	1.43	-1.36	1.55	0.7	0.22	-1.07	-0.12	-1.08	-2.75	-2.34	-0.52	-2.84	0.89	-0.2025	-1.8025	0.425454	0.83715	0.106932	1	0.999631	0.568797
Cacna1e_Q61290_S856s_1	-2.58	-3.84	-4.69	-3.5	-1.96	-3.48	-3.6	-3.87	-3.08	-2.56	-3.49	-3.69	-2.45	-4.24	-3.81	-4.21	0.425	0.4475	-0.025	0.455111	0.364331	0.964432	1	0.999631	0.987331
Cacna1e_Q61290_S873s_1	1.11	-0.72	-1.45	1.28	1.41	-0.01	1.06	1.17	0.64	-0.84	0.8	-0.5	-1.23	-0.32	-0.27	-0.1	0.8525	-0.03	-0.535	0.218732	0.965918	0.417465	1	0.999631	0.771469
Cacna1e_Q61290_S948s_1	-1.4	-1.87	-0.59	0.14	-1.93	-1.69	-0.12	0.06	-2.1	-2.3	-0.47	-0.29	-1.98	-1.98	-0.32	0.06	0.01	-0.36	-0.125	0.98699	0.567582	0.842886	1	0.999631	0.94811
Cacna1e_Q61290_S988s_1	1.39	1.12	0.49	1.49	1.67	1.42	1.14	1.87	0.97	0.32	1.47	0.98	-0.54	0.8	0.95	1.78	0.4025	-0.1875	-0.375	0.229755	0.604413	0.464782	1	0.999631	0.794369
Cacna1e_Q61290_T2225t_1	1.34	1.58	0.74	1.59	1.97	0.89	1.23	1.44	0.62	0.32	1.53	1.11	-1.07	0.8	0.49	1.35	0.07	-0.4175	-0.92	0.835972	0.268145	0.103703	1	0.999631	0.567918
Cacna1e_Q61290_T29t_1	0.21	-0.16	-0.42	0.23	0.23	0.02	-0.09	0.53	0.26	-0.42	-0.03	-0.26	-0.49	-0.05	0.26	0.49	0.2075	-0.0775	0.0875	0.472033	0.793459	0.793521	1	0.999631	0.928057
Cacna1e_Q61290_T441t_1	-1.3	0.65	1.56	-0.05	-0.28	0.31	1.04	1.1	0.36	-0.74	2.17	2.15	1.23	-0.46	1.84	0.53	0.3275	0.77	0.57	0.598372	0.358543	0.418502	1	0.999631	0.771707
Cacna1g_Q5SUG2_S1063s_1	-1.74	-4.25	-0.38	-2.63	-3.51	-4.01	-0.76	-2.32	-5.13	-3.36	-1.1	-3.18	-3.05	-3.44	-1.35	-1.67	-0.4	-0.9425	-0.1275	0.671154	0.357	0.878247	1	0.999631	0.962347
Cacna1g_Q5SUG2_S2068s_1	0.3	1.75	0.39	-0.39	1.64	0	1.15	-0.99	2.64	0.12	-0.14	1.42	2.62	0.18	-1.23	-1.29	-0.0625	0.4975	-0.4425	0.924531	0.481325	0.617188	1	0.999631	0.861376
Cacna1g_Q5SUG2_S467s_1	-1.05	-1.21	-1.27	-1.32	-0.66	-0.62	-1.14	-0.79	-1.1	-0.61	-1.08	-0.72	0.21	-0.3	-1.4	-0.46	0.41	0.335	0.725	0.126921	0.219707	0.0792216	1	0.999631	0.545579
Cacna1g_Q5SUG2_S518s_1	0.81	-1.03	-1.38	-0.2	-0.01	0.13	0.43	0.59	-0.02	-0.02	-0.22	-1.33	-1.2	-0.86	-0.19	-0.85	0.735	0.0525	-0.325	0.149299	0.922468	0.525441	1	0.999631	0.823288
Cacna1h_E9Q6P9_S1203s_1	1.72	0.59	1.79	1.26	-0.07	0.82	0.83	1.07	1.05	1.52	2.2	-0.49	-0.58	-0.37	0.34	-0.27	-0.6775	-0.27	-1.56	0.102946	0.644057	0.00196508	1	0.999631	0.351308
Cacna1h_E9Q6P9_S2195s_1	0.01	0.27	0.25	-0.31	0.13	-0.17	-0.48	0.34	0.37	-0.17	-0.01	0.28	1.23	0.12	0.56	0.45	-0.1	0.0625	0.535	0.733615	0.823964	0.135893	1	0.999631	0.608661
Cacna1h_E9Q6P9_T1172t_1	0.2	-1.07	-0.89	0.02	0.28	-1.29	-0.64	-0.8	-1.27	-0.03	-0.99	-0.88	-0.67	-0.61	-1.23	-0.85	-0.1775	-0.3575	-0.405	0.690401	0.403396	0.303986	1	0.999631	0.715879
Cacna1h_E9Q6P9_T751t_1	-0.14	0.47	1.47	0.3	1.26	1.39	0.91	2	1.36	0.79	0.74	1.35	2.28	1.53	1.75	1.68	0.865	0.535	1.285	0.0575395	0.196962	0.008858	1	0.999631	0.365244
Cacna1i_E9Q7P2_S1017s_1	0.35	1.17	0	0.13	0.49	0.69	-0.56	-0.51	0.76	0.7	-0.34	0	0.59	0.92	-0.4	0.76	-0.385	-0.1325	0.055	0.366681	0.73608	0.894102	1	0.999631	0.965259
Cacna1i_E9Q7P2_S1744s_1	0.99	-0.47	0.67	0.49	0	-0.19	0.71	0.12	-0.21	0.38	0.77	0.48	-0.71	-0.66	0.16	-0.22	-0.26	-0.065	-0.7775	0.501213	0.86822	0.0753048	1	0.999631	0.541044
Cacna1i_E9Q7P2_S1745s_1	0.4	-0.84	-0.66	-0.4	0.76	-1.11	-0.38	-0.48	0.22	0.36	-0.54	-0.23	-1.45	-1.04	-0.44	-0.7	0.0725	0.3275	-0.5325	0.874024	0.386551	0.186593	1	0.999631	0.646474
Cacna1i_E9Q7P2_S2037s_1	1.89	-0.84	-1.43	0.13	1.12	-0.05	1.08	0.12	0.16	0.01	-0.39	-1.33	-1.08	-0.47	-1.46	-0.72	0.63	-0.325	-0.87	0.377428	0.649057	0.216981	1	0.999631	0.669465
Cacna1i_E9Q7P2_S2157s_1	1.18	0.56	-0.48	1.06	0.92	0.47	1.02	0.42	0.41	-0.41	1.29	0.69	-0.41	-0.04	-0.75	1.33	0.1275	-0.085	-0.5475	0.755401	0.863026	0.33281	1	0.999631	0.728079
Cacna1i_E9Q7P2_S895s_1	1.37	-0.4	0.06	0.43	1.8	0.02	0.81	0.17	-0.22	-0.88	-0.61	-0.66	-0.7	0.07	-0.32	-1.08	0.335	-0.9575	-0.8725	0.519295	0.0390168	0.0757885	1	0.999631	0.541044
Cacna1i_E9Q7P2_T469t_1	-0.01	1	1.13	1.38	0.61	1.21	1.28	1.45	1.23	0.38	1.32	1.23	0.71	0.17	1.02	1.08	0.2625	0.165	-0.13	0.487224	0.675688	0.743286	1	0.999631	0.90972
Cacnb1_A2A543_S464s_1	-0.16	-0.25	-1.35	-0.4	-0.25	0.32	-1.06	-0.52	-0.1	0.88	-0.98	-0.59	0.14	0.37	-0.42	-0.18	0.1625	0.3425	0.5175	0.686446	0.472596	0.181762	1	0.999631	0.643861
Cacnb1_Q8R3Z5_S186s_1	0.19	0.9	-0.18	0.76	-0.45	0.75	0.69	0.92	0.88	1.2	0.44	0.48	0.75	1.73	1.12	0.88	0.06	0.3325	0.7025	0.881912	0.352415	0.0837165	1	0.999631	0.549732
Cacnb1_Q8R3Z5_S436s_1	0.01	-0.01	-1.81	-2.58	-0.17	-0.97	-1.41	-2.43	-0.76	-1.47	-2.66	-3.93	-1.04	-1.16	-1.9	-3.8	-0.1475	-1.1075	-0.8775	0.83571	0.205114	0.285321	1	0.999631	0.705851
Cacnb1_Q8R3Z5_S53s_2	0.27	0.31	0	1.04	1.59	0.52	0.46	1.57	1.32	0.43	0.42	0.82	-0.19	1.39	0.34	1.17	0.63	0.3425	0.2725	0.133192	0.337545	0.535237	1	0.999631	0.829114
Cacnb1_Q8R3Z5_S68s_1	-1.67	0.05	-0.04	-1.34	-0.97	-1.11	-0.46	-1.19	0.72	-0.3	-0.34	0.19	2.53	-0.27	0.45	-0.11	-0.1825	0.8175	1.4	0.68864	0.116751	0.0670654	1	0.999631	0.520345
Cacnb1_Q8R3Z5_T205t_1	-0.3	-1.35	0.17	-0.55	-1.43	-1.1	-0.89	-1.24	-1.31	-0.18	-0.97	-0.96	-1.14	-1.03	-0.91	-1.01	-0.6575	-0.3475	-0.515	0.0933613	0.402543	0.18144	1	0.999631	0.643843
Cacnb1_Q8R3Z5_T217t_1	-2.36	-0.17	-0.13	-0.11	-0.63	-0.6	-0.71	-0.07	-0.73	-1.5	-0.29	0.42	0.72	-0.33	0.29	-0.11	0.19	0.1675	0.835	0.721366	0.787753	0.157412	1	0.999631	0.628054
Cacnb1_Q8R3Z5_T499t_1	-0.07	0.44	0.92	0.17	1.06	0.77	-0.48	-1.59	1.08	0.16	-0.38	-1.76	0.31	0.07	-0.54	0.07	-0.425	-0.59	-0.3875	0.474212	0.321221	0.273662	1	0.999631	0.700187
Cacnb1_Q8R3Z5_T540t_1	-1.36	-0.39	-0.5	-0.91	0.07	-0.61	-1.13	-1.03	-0.08	-0.94	-0.83	-0.93	1.17	-0.73	-0.64	-0.74	0.115	0.095	0.555	0.756044	0.783094	0.279713	1	0.999631	0.701922
Cacnb2_Q8CC27_S485s_1	-1.07	-0.51	-0.57	-0.13	-1.03	-1.33	-0.7	-0.63	-0.62	-0.78	-0.56	0.27	-0.77	-0.7	-0.64	0.01	-0.3525	0.1475	0.045	0.269223	0.671319	0.892876	1	0.999631	0.964596
Cacnb2_Q8CC27_S508s_1	-0.17	-0.38	-0.25	0.71	-0.65	-1.01	0.05	1.08	-0.2	-1	0.21	1.26	-0.42	-0.55	-0.57	-0.42	-0.11	0.09	-0.4675	0.823187	0.858101	0.175042	1	0.999631	0.642116
Cacnb2_Q8CC27_S510s_1	-0.17	-0.38	-1.88	-2.32	-0.65	-1.01	-1.45	-1.92	-0.2	-1	-1.86	-1.95	-0.42	-0.55	-1.76	-2.66	-0.07	-0.065	-0.16	0.899116	0.915523	0.812308	1	0.999631	0.937041
Cacnb2_Q8CC27_S552s_1	-0.72	-1.84	-0.22	-1.17	-2.02	-0.51	-1.13	-0.53	-1.38	-0.52	-1.38	-1.71	-0.44	-0.28	-0.66	-0.96	-0.06	-0.26	0.4025	0.898542	0.54753	0.325944	1	0.999631	0.724678
Cacnb2_Q8CC27_S570s_1	0.38	-0.42	-0.18	0.08	-0.77	-0.35	0.06	-0.38	-0.43	-0.11	-1.08	-0.78	-2.4	-0.73	-1.48	-1.79	-0.325	-0.565	-1.565	0.297412	0.108454	0.00313382	1	0.999631	0.351308
Cacnb2_Q8CC27_S69s_1	1.35	0.85	0.93	0.52	0.29	1.56	0.88	0.4	1.08	1.82	1.08	1.41	0.62	0.4	0.48	0.76	-0.13	0.435	-0.3475	0.71853	0.184182	0.259377	1	0.999631	0.692624
Cacnb2_Q8CC27_S83s_1	-2.64	2.35	1.3	-2.55	0.87	1.26	-0.91	-2.64	1.75	0.17	-0.81	-0.11	4.58	-0.19	-0.57	-0.56	0.03	0.635	1.2	0.9821	0.599449	0.435621	1	0.999631	0.780319
Cacnb2_Q8CC27_T549t_1	0.51	0.41	3.33	0.95	-0.16	-0.09	1.9	3.11	-0.48	0.37	2.32	1.97	-0.54	-1.46	2.89	3.63	-0.11	-0.255	-0.17	0.903827	0.760281	0.888121	1	0.999631	0.963505
Cacnb3_D3Z3Z3_S151s_1	-0.54	-0.84	-0.3	-0.81	-1.12	-0.79	-0.79	-0.84	-1.17	-0.33	-0.44	-0.65	0.14	-0.58	-0.79	-0.07	-0.2625	-0.025	0.2975	0.322083	0.933753	0.373652	1	0.999631	0.747035
Cacnb3_D3Z3Z3_S31s_1	-2.31	-1.73	-1.71	-0.83	0.44	-1.67	-1.85	-0.51	-1.12	-4.82	-0.57	-1.62	0.61	-0.59	-1.84	-1.71	0.7475	-0.3875	0.7625	0.205048	0.658448	0.217074	1	0.999631	0.669465
Cacnb3_D3Z3Z3_S392s_1	-0.38	-0.53	-0.7	-0.96	-0.91	-0.45	-0.73	-0.7	-0.27	0.02	-0.67	-0.67	0.29	-0.1	-0.59	-0.38	-0.055	0.245	0.4475	0.832953	0.411156	0.177474	1	0.999631	0.642116
Cacnb3_D3Z3Z3_S402s_1	-1.68	-0.92	-0.12	-0.69	-1.07	-0.79	-0.68	-0.48	-1.06	-1.44	0.1	-0.28	-0.04	-0.95	0.49	0.03	0.0975	0.1825	0.735	0.790264	0.695073	0.121596	1	0.999631	0.590097
Cacnb3_D3Z3Z3_S406s_1	-1.17	-0.83	-0.95	-1.13	-0.88	0.57	-1.04	-0.63	0.2	0.19	-0.55	-1.07	-0.02	-0.13	0.01	-0.58	0.525	0.7125	0.84	0.193516	0.0686866	0.0137192	1	0.999631	0.385092
Cacnb4_Q8R0S4_S16s_1	0.52	0.41	-0.13	-0.48	-0.72	0.11	-0.57	0.24	-1.04	0.65	-0.08	-0.41	-1.56	0.2	-0.39	-0.01	-0.315	-0.3	-0.52	0.390782	0.48544	0.268632	1	0.999631	0.696662
Cacnb4_Q8R0S4_S38s_1	-0.64	0.06	-1.1	-0.23	0.11	-0.26	-0.89	0.03	-0.43	-0.44	-0.24	0	-0.95	-0.03	-0.66	0.06	0.225	0.2	0.0825	0.538331	0.544792	0.830325	1	0.999631	0.942193
Cacnb4_Q8R0S4_S423s_1	0.03	-0.2	-0.94	-0.9	0.25	0.23	-0.14	-1.04	0.54	-1.38	-0.49	0.03	-0.24	-0.28	-1.33	-0.64	0.3275	0.1775	-0.12	0.416232	0.70283	0.755901	1	0.999631	0.913733
Cacnb4_Q8R0S4_S443s_2	0.44	1.05	0.66	1.9	1.4	1.06	0.78	1.75	1.16	0.93	1.32	0.8	-0.97	0.18	0.38	-0.05	0.235	0.04	-1.1275	0.552526	0.913795	0.0268224	1	0.999631	0.422285
Cacnb4_Q8R0S4_S447s_1	0.59	0.29	1.42	-0.48	-0.43	1	-0.37	-0.16	0.88	2.25	0.39	0.28	1.05	-0.04	0.45	-0.61	-0.445	0.495	-0.2425	0.37172	0.382095	0.632524	1	0.999631	0.868271
Cacnb4_Q8R0S4_S447s_2	0.86	1.13	0.66	1.9	1.61	1.43	0.78	1.75	1.44	1.51	1.32	0.8	-0.24	0.6	0.38	-0.05	0.255	0.13	-0.965	0.492093	0.713557	0.0254224	1	0.999631	0.422114
Cacnb4_Q8R0S4_S507s_1	0.34	-1.64	1.14	0.37	-1.29	-1.16	1.86	-0.65	-2.19	0.45	-0.82	-0.68	-1.61	-1.92	-0.41	-2.05	-0.3625	-0.8625	-1.55	0.661455	0.24487	0.0321562	1	0.999631	0.442395
Cacnb4_Q8R0S4_S50s_1	1.35	0.85	0.93	0.52	0.29	1.56	0.88	0.4	1.08	1.82	1.08	1.41	0.62	0.4	0.48	0.76	-0.13	0.435	-0.3475	0.71853	0.184182	0.259377	1	0.999631	0.692624
Cacnb4_Q8R0S4_S64s_1	-2.64	2.35	-0.65	-3.64	0.87	1.26	-1.95	-3.88	1.75	0.17	-2.05	-2.13	4.58	-0.19	-2.23	-2.57	0.22	0.58	1.0425	0.885033	0.675517	0.558125	1	0.999631	0.838323
Cacng2_O88602_S249s_1	1.74	-1.89	-0.88	-2.03	-3.76	-1.42	0.32	-4.08	-4.15	0.82	-3.55	-3.53	-0.84	-2.33	-3.63	-2	-1.47	-1.8375	-1.435	0.224073	0.160014	0.134773	1	0.999631	0.606296
Cacng2_O88602_S253s_1	-2.4	1.58	1.02	-0.44	1.42	2.06	0.37	0.78	1.69	-1.26	1.02	0.79	2.35	0.75	0.86	0.05	1.2175	0.62	1.0625	0.168785	0.517292	0.241994	1	0.999631	0.684914
Cacng2_O88602_Y288y_1	0.74	0.65	0.49	1.06	0.1	0.38	0.43	0.3	0.15	0.12	0.11	-0.62	-0.44	-0.69	-0.4	0.53	-0.4325	-0.795	-0.985	0.113624	0.0228723	0.017197	1	0.999631	0.391024
Cacng3_Q9JJV5_S248s_1	-4.62	2.65	2.37	-0.47	2.27	1.63	1.06	1.42	2.17	-2.01	3.03	2.91	3.21	0.86	1.93	0.95	1.6125	1.5425	1.755	0.281492	0.38851	0.2558	1	0.999631	0.690775
Cacng3_Q9JJV5_S302s_1	2.24	0.42	0.55	1.54	1.89	2.1	1.99	1.59	1.09	0.2	1.46	-0.67	0.32	0.23	0.85	0.52	0.705	-0.6675	-0.7075	0.12927	0.272414	0.139972	1	0.999631	0.611718
Cacng4_Q9JJV4_S228s_1	0.12	-0.99	0.12	-0.56	-1.12	-1.15	0.02	-1.28	-0.33	-0.45	-0.57	-0.53	-0.6	-2.32	-0.92	-2.97	-0.555	-0.1425	-1.375	0.195266	0.667419	0.035801	1	0.999631	0.453811
Cacng4_Q9JJV4_S253s_1	1.3	-2.18	-1.49	-1.18	-3.17	-2.59	0.3	-2.93	-4.96	0.43	-2.88	-2.39	-1.03	-3.66	-2.32	-3.17	-1.21	-1.5625	-1.6575	0.224843	0.196494	0.0685485	1	0.999631	0.523794
Cacng4_Q9JJV4_S259s_1	-2.78	1.39	1.14	-0.54	1.13	0.68	0.21	1.32	1.38	-1.48	1.93	2.14	2.66	0.79	1.86	0.54	1.0325	1.19	1.66	0.248871	0.293193	0.0981201	1	0.999631	0.561078
Cacng8_S4R2F1_S251s_1	-2.39	-0.89	-0.66	-1.02	-1.57	-1.62	-1.4	-1.57	-1.22	-1.39	-0.97	-0.99	0.27	-0.98	-0.8	-1.3	-0.3	0.0975	0.5375	0.458252	0.81246	0.29408	1	0.999631	0.708293
Cacng8_S4R2F1_S254s_1	-1.85	-1.27	-1.1	-1.47	-1.29	-0.97	-1.51	-1.26	-1.4	-0.96	-0.77	-1.01	0.01	-0.98	-0.63	-0.65	0.165	0.3875	0.86	0.557221	0.205455	0.0255451	1	0.999631	0.422114
Cacng8_S4R2F1_S257s_1	0.5	-0.95	-0.76	0.2	1.14	-0.83	0.56	-0.09	-0.02	-1.34	-0.48	-0.51	-0.79	0.21	-0.35	-0.63	0.4475	-0.335	-0.1375	0.394417	0.456538	0.748173	1	0.999631	0.911931
Cacng8_S4R2F1_S290s_1	-1.1	0.23	0.02	-0.73	0.51	-0.06	-0.27	0.31	-0.11	-1.44	0.28	0.24	0.55	0.3	-0.22	-0.2	0.5175	0.1375	0.5025	0.188865	0.778332	0.220933	1	0.999631	0.671424
Cacng8_S4R2F1_S357s_1	-0.17	-0.08	-1.77	0.16	1.19	0.01	0.47	0.21	0.29	-0.78	0.25	0.09	-1.51	0	-0.37	-0.45	0.935	0.4275	-0.1175	0.0773584	0.388236	0.820595	1	0.999631	0.938379
Cacng8_S4R2F1_T415t_1	1.77	0.77	1.76	2.33	0.69	2	2.01	1.57	-0.17	0.91	1.07	-0.39	-2.04	0.17	-0.03	0.32	-0.09	-1.3025	-2.0525	0.837094	0.0199012	0.0055289	1	0.999631	0.351308
Cactin_Q9CS00_S148s_1	-0.4	0.52	-1.16	-0.24	-0.03	-0.66	-1.3	-0.21	0.25	-0.52	0.41	0.36	0.54	-0.78	-0.96	0.2	-0.23	0.445	0.07	0.599974	0.296939	0.885503	1	0.999631	0.963505
Cactin_Q9CS00_S96s_1	1.08	1.13	1.21	0.98	1.38	1.14	1.12	1.11	1.33	1.05	0.98	0.61	-0.02	1.53	0.51	1.44	0.0875	-0.1075	-0.235	0.711057	0.689875	0.561361	1	0.999631	0.840316
Cad_E9QAI5_T1770t_1	-1.11	-1.5	-2.03	-1.23	-1.12	-1.44	-1	-0.5	-1.32	-0.77	-0.79	-0.9	-1.54	-0.58	-1.33	-0.63	0.4525	0.5225	0.4475	0.187162	0.116016	0.23766	1	0.999631	0.683301
Cadm2_G3UZM4_S423s_1	-3.55	-2.1	0.28	1.15	-2.85	-2.98	-0.39	0.46	-2.42	-3.12	-0.11	-0.28	-1.74	-1.5	0.85	0.79	-0.385	-0.4275	0.655	0.74533	0.70639	0.553667	1	0.999631	0.837943
Cadm4_Q8R464_S361s_1	-1.07	-1.44	-1.28	-1.64	-1.88	-1.28	-1.51	-1.15	-1.9	-0.76	-1.57	-1.94	-0.54	-1.07	-1.21	-0.81	-0.0975	-0.185	0.45	0.729222	0.592243	0.15457	1	0.999631	0.625677
Cadps_Q80TJ1_S375s_1	-1.32	-0.51	-1.71	-1.11	0.78	-0.15	0.61	-1.59	-0.27	-1.33	0	-0.62	0.57	-0.73	-1.66	-1.38	1.075	0.6075	0.3625	0.0737129	0.148638	0.494719	1	0.999631	0.810404
Cadps_Q80TJ1_S486s_1	-0.66	-2.21	-0.55	-2.36	-1.81	-2.25	-0.31	-2	-2.54	-1.48	-2.76	-0.81	-1.57	-1.32	-1.19	-0.17	-0.1475	-0.4525	0.3825	0.803418	0.462796	0.483342	1	0.999631	0.803286
Cadps_Q80TJ1_S89s_1	1.2	1.07	-1.99	1.42	2.58	1.4	2.25	0.75	2.09	-0.91	1.24	-0.29	1.06	0.71	-0.18	-0.9	1.32	0.1075	-0.2525	0.121032	0.907066	0.753595	1	0.999631	0.913377
Cadps_Q80TJ1_S96s_1	-0.17	-0.56	1.84	0.22	-0.23	0.5	-0.32	0.48	-0.28	0.32	-0.58	0.72	-0.31	0.56	0.85	1.12	-0.225	-0.2875	0.2225	0.671921	0.608264	0.694789	1	0.999631	0.895302
Cadps2_S4R1C6_S161s_1	-0.81	-0.5	-0.66	-0.74	-0.74	-0.75	-1.12	-0.64	-0.81	-0.86	-1.08	-1.18	-0.34	-0.62	-0.19	-1.1	-0.135	-0.305	0.115	0.589815	0.244607	0.709364	1	0.999631	0.899175
Cadps2_S4R1C6_S39s_1	-0.76	-0.84	0.77	0.07	-0.65	0.49	-0.98	-0.1	-0.02	0.55	-1.04	0.62	-0.94	0.97	0.64	0.76	-0.12	0.2175	0.5475	0.80041	0.670998	0.325178	1	0.999631	0.72463
Cadps2_S4R1C6_T811t_1	-0.33	-0.67	0.15	-0.22	-0.71	-0.51	0.49	0	-0.61	-0.28	0.29	0.95	-0.52	-1.06	-0.31	-0.61	0.085	0.355	-0.3575	0.807349	0.380295	0.275631	1	0.999631	0.700187
Calcoco1_E9Q7U2_S563s_1	-0.27	-0.21	-0.81	0.04	-0.39	-0.41	-0.76	0.12	-0.44	-0.61	-0.62	-0.24	-0.61	-0.73	-0.19	-0.19	-0.0475	-0.165	-0.1175	0.878163	0.570074	0.710469	1	0.999631	0.899851
Calml3_P0DP28_S82s_1	-0.07	3.76	3.03	1.47	2.83	3.56	2.36	2.22	3.47	0.95	2.97	2.19	3.06	2.65	2.08	1.21	0.695	0.3475	0.2025	0.389035	0.694793	0.804817	1	0.999631	0.934231
Camk1_Q91YS8_S324s_1	-1.53	-0.82	0.5	-0.09	-0.35	-1.1	-1.02	-2.24	-0.93	-1.04	-0.38	-0.2	0.65	-0.16	-1.06	0.39	-0.6925	-0.1525	0.44	0.221578	0.746013	0.425142	1	0.999631	0.774293
Camk1_Q91YS8_T177t_1	-1.23	0.17	-2.05	-2.64	-0.41	1.89	-1.5	-2.34	-0.97	-0.68	-2.21	-2.79	-0.8	2.53	-3.38	-2.14	0.8475	-0.225	0.49	0.382003	0.749068	0.6828	1	0.999631	0.889602
Camk1_Q91YS8_T339t_1	-0.72	-0.11	-0.89	-0.63	-0.04	0.06	-0.45	-0.06	-1.05	-1.69	-0.92	-0.42	-0.31	-0.32	-0.09	-0.46	0.465	-0.4325	0.2925	0.123308	0.235156	0.335221	1	0.999631	0.730219
Camk1d_Q8BW96_S319s_1	-0.9	-0.59	-1.2	-0.8	-0.09	-0.96	-0.76	-0.81	-0.53	-1.13	-1.1	-0.44	-0.42	-0.31	-1.11	-0.58	0.2175	0.0725	0.2675	0.469943	0.80884	0.398644	1	0.999631	0.761726
Camk1d_Q8BW96_S349s_1	0.83	-0.32	0.23	0.85	-0.42	0.19	0.72	0.5	0.31	1.06	0.45	0.16	-0.35	-0.8	0.46	-0.25	-0.15	0.0975	-0.6325	0.697426	0.792195	0.140725	1	0.999631	0.612258
Camk1d_Q8BW96_T172t_1	-1.39	-0.42	0.39	-0.11	-1.55	1.43	-0.14	1.92	-1.74	-1.13	1.61	-0.97	-1.33	1.42	-0.43	-0.32	0.7975	-0.175	0.2175	0.311549	0.812042	0.726838	1	0.999631	0.905774
Camk2a_F8WIS9_S272s_1	-0.24	5.45	5.74	0.29	3.35	2.14	2.57	2.07	7.31	-0.3	5.59	8.45	11.45	1.64	3.87	2.61	-0.2775	2.4525	2.0825	0.842056	0.267371	0.374056	1	0.999631	0.747035
Camk2a_F8WIS9_S275s_1	0.21	1.11	2.89	0.38	-0.1	0.34	0.61	0.61	0.23	0.73	1.09	0.51	0.75	0.35	0.82	0.8	-0.7825	-0.5075	-0.4675	0.196672	0.395174	0.42293	1	0.999631	0.773293
Camk2a_F8WIS9_S275s_2	0.11	2.18	4.17	-0.03	3.46	0.74	0.02	3.1	0.7	1.61	0.46	1.29	5	1.54	1.16	1.02	0.2225	-0.5925	0.5725	0.842519	0.512041	0.62433	1	0.999631	0.86356
Camk2a_F8WIS9_S279s_1	0.27	1.66	3.85	-0.55	-1.54	0.38	0.16	0.04	-0.26	1.18	1.27	0.35	2.3	0.72	0.3	1.17	-1.5475	-0.6725	-0.185	0.115531	0.459028	0.838596	1	0.999631	0.946365
Camk2a_F8WIS9_S279s_2	0.11	2.18	4.17	-0.03	3.46	0.74	0.02	3.1	0.7	1.61	0.46	1.29	5	1.54	1.16	1.02	0.2225	-0.5925	0.5725	0.842519	0.512041	0.62433	1	0.999631	0.86356
Camk2a_F8WIS9_S481s_1	0.23	-0.12	-0.01	0.21	-0.89	-0.11	0.09	-0.52	0.09	-0.35	1.53	-0.61	0.7	-0.25	0.11	0.09	-0.435	0.0875	0.085	0.167758	0.852004	0.783871	1	0.999631	0.922628
Camk2a_F8WIS9_S485s_1	-0.57	-1.5	-0.7	-0.22	-1.11	-2.76	-1.12	-0.08	-1.65	-0.71	0.12	1	-1.41	-1.62	-2.28	-1.01	-0.52	0.4375	-0.8325	0.36686	0.45488	0.0610805	1	0.999631	0.509355
Camk2a_F8WIS9_T253t_1	-0.55	2.16	2.74	0.81	0.22	1.33	-0.29	0.35	0.96	0.92	0.76	1.24	4.7	2.11	1.07	2.3	-0.8875	-0.32	1.255	0.232797	0.632125	0.190826	1	0.999631	0.648674
Camk2a_F8WIS9_T286t_1	0.97	2.18	3.09	1.34	0.51	1.96	1.22	1.15	0.82	1.75	2.03	0.7	1.34	1.51	0.28	1.68	-0.685	-0.57	-0.6925	0.206674	0.303511	0.213245	1	0.999631	0.666787
Camk2a_P11798_S330s_1	-0.03	1	-1.67	-1.93	0.03	0.92	-0.76	-1.54	1.89	0.67	-0.77	-1.33	1.54	0.07	-1.43	-1.42	0.32	0.7725	0.3475	0.676805	0.387433	0.687069	1	0.999631	0.891291
Camk2a_P11798_S331s_1	-1.64	-0.85	1.05	-0.27	-0.87	-1.47	0.08	0.16	-1.73	-1.27	0.43	0.19	-0.67	-1.8	0.12	0.59	-0.0975	-0.1675	-0.0125	0.874967	0.809337	0.985444	1	0.999631	0.995133
Camk2a_P11798_S333s_2	-1.44	-1.13	-1.97	-2.1	-1.12	-0.94	-1.62	-3.18	-1.04	-0.91	-1.78	-2.78	-0.49	-1.58	-3.02	-2.63	-0.055	0.0325	-0.27	0.915408	0.944768	0.634805	1	0.999631	0.868886
Camk2a_P11798_T334t_1	-0.53	0.4	-0.1	-0.13	-0.28	0.37	0.21	-0.42	-0.19	0.09	0.26	0.1	0.04	-0.57	0.23	0.23	0.06	0.155	0.0725	0.850457	0.600774	0.829601	1	0.999631	0.942058
Camk2a_P11798_T334t_2	-2.56	-2.68	0.25	-0.01	-2.06	-2.17	-0.01	-0.18	-2.25	-2.16	-0.28	-0.29	-1.66	-3.11	0.09	-0.53	0.145	0.005	-0.0525	0.865437	0.995276	0.954072	1	0.999631	0.984441
Camk2a_P11798_T336t_1	-1.32	0.78	0.76	-0.37	-0.71	-0.08	-0.61	-0.64	0.25	0.14	0.18	0.29	1.39	-0.51	-0.36	-0.19	-0.4725	0.2525	0.12	0.350601	0.604716	0.843806	1	0.999631	0.948343
Camk2a_P11798_T336t_2	-1.85	-1.33	-0.13	-0.33	-0.5	-1.16	-0.24	-0.67	-1.11	-0.9	-0.56	-0.54	-1	-1.73	-0.39	-0.87	0.2675	0.1325	-0.0875	0.547283	0.758698	0.855312	1	0.999631	0.951817
Camk2a_P11798_T337t_1	-1.4	-0.57	-0.22	-0.6	-1.27	-0.44	-0.19	-0.91	-0.62	-0.6	0.29	0.04	0.24	-1.48	-0.31	-0.77	-0.005	0.475	0.1175	0.989119	0.216409	0.791226	1	0.999631	0.926539
Camk2a_P11798_T337t_2	-1.61	-1.09	0.15	-0.09	-1.16	-1.01	-0.12	-0.33	-1.02	-1	-0.29	-0.32	-0.42	-1.69	-0.05	-0.75	0.005	0.0025	-0.0675	0.991417	0.995589	0.89578	1	0.999631	0.966139
Camk2b_P28652_S331s_1	0.42	-0.11	0.53	0.32	0.65	-0.14	-0.25	0.04	-0.79	-0.19	-0.39	0.72	0.58	0.01	0.15	0.47	-0.215	-0.4525	0.0125	0.485693	0.244607	0.966713	1	0.999631	0.988351
Camk2b_P28652_S363s_1	0.61	0.33	0.11	1.18	0.76	0.96	0.81	0.64	0.79	0.51	0.54	-0.12	0.04	0.63	-0.18	0	0.235	-0.1275	-0.435	0.443895	0.712109	0.230677	1	0.999631	0.681463
Camk2b_P28652_S367s_1	-0.59	-0.31	0.6	0.02	-0.65	-0.25	0.36	-0.57	-0.63	-0.47	0.36	-0.41	-0.11	-0.95	0.24	-0.74	-0.2075	-0.2175	-0.32	0.57265	0.557107	0.431558	1	0.999631	0.778356
Camk2b_P28652_S371s_1	-0.16	0.64	0.98	1.43	0.17	0.84	0.81	1.56	-0.16	0.27	0.32	1.49	0.2	0.64	0.96	1.9	0.1225	-0.2425	0.2025	0.776628	0.608923	0.673688	1	0.999631	0.885515
Camk2b_P28652_T287t_1	0.48	1.1	1.78	0.63	0.09	1.03	0.7	0.64	0.4	1.25	0.79	0.26	0.59	1.04	-0.06	0.81	-0.3825	-0.3225	-0.4025	0.314841	0.412395	0.327402	1	0.999631	0.724678
Camk2b_P28652_T382t_1	-0.25	1.15	1.34	0.4	-1.14	1.81	0.72	-0.14	-1.68	-0.75	1.48	-4.04	-0.05	0.85	-2.17	0.25	-0.3475	-1.9075	-0.94	0.594627	0.0900925	0.18262	1	0.999631	0.643861
Camk2b_P28652_T400t_1	-2	-0.6	-0.08	-1.05	-0.99	-0.93	-0.26	-1.37	-0.12	-0.69	0.04	-0.16	0.53	-1.37	-0.84	-0.94	0.045	0.7	0.2775	0.920596	0.131692	0.610319	1	0.999631	0.859048
Camk2b_P28652_T400t_2	-0.98	-0.29	-0.54	-1.1	-1.1	-0.19	-0.69	-1.47	-0.41	-0.03	-0.91	-0.56	0.33	-0.86	-0.74	-1.03	-0.135	0.25	0.1525	0.707275	0.443857	0.697278	1	0.999631	0.895731
Camk2b_P28652_T401t_2	-1.3	-0.88	-0.42	-1.03	-1.37	-0.68	-0.78	-1.32	-0.84	-0.47	-0.97	-1.16	0.01	-1.17	-0.53	-1.34	-0.13	0.0475	0.15	0.677415	0.876593	0.701662	1	0.999631	0.896835
Camk2b_Q5SVI1_S427s_1	-1.01	-0.55	-1.16	-0.63	-1.49	-0.87	-0.61	-0.14	-0.4	-0.64	0.27	-0.64	-1.17	-0.7	-0.77	-0.03	0.06	0.485	0.17	0.863112	0.153145	0.621222	1	0.999631	0.861888
Camk2b_Q5SVJ0_T400t_1	-2	-0.6	-0.08	-1.05	-0.99	-0.93	-0.26	-1.37	-0.12	-0.69	0.04	-0.16	0.53	-1.37	-0.84	-0.94	0.045	0.7	0.2775	0.920596	0.131692	0.610319	1	0.999631	0.859048
Camk2b_Q5SVJ0_T400t_2	-0.98	-0.29	-0.54	-1.1	-1.1	-0.19	-0.69	-1.47	-0.41	-0.03	-0.91	-0.56	0.33	-0.86	-0.74	-1.03	-0.135	0.25	0.1525	0.707275	0.443857	0.697278	1	0.999631	0.895731
Camk2b_Q5SVJ0_T401t_2	-1.3	-0.88	-0.42	-1.03	-1.37	-0.68	-0.78	-1.32	-0.84	-0.47	-0.97	-1.16	0.01	-1.17	-0.53	-1.34	-0.13	0.0475	0.15	0.677415	0.876593	0.701662	1	0.999631	0.896835
Camk2d_E9Q1T1_S235s_1	-0.56	-0.56	-0.82	-0.93	-0.8	-0.84	-1.15	-0.98	-1	-1.38	-0.7	-0.14	0.1	-0.33	-0.76	-0.22	-0.225	-0.0875	0.415	0.374417	0.791231	0.191542	1	0.999631	0.648674
Camk2d_E9Q1T1_S276s_1	-0.39	0.98	1.26	-1.03	-1.28	-0.82	-0.79	-1	0.04	1.02	-0.45	0.98	3.5	-0.05	0.11	0.72	-1.1775	0.1925	0.865	0.044308	0.748055	0.326239	1	0.999631	0.724678
Camk2d_E9Q1T1_S276s_2	-0.8	3.5	3.91	-0.52	-1.85	1.08	-0.94	-0.38	1.03	1.86	1.04	0.57	5.62	1.6	1.23	1.7	-2.045	-0.3975	1.015	0.113076	0.720994	0.466301	1	0.999631	0.795267
Camk2d_E9Q1T1_S280s_1	-0.41	1.6	2.5	-1.33	-3.04	-0.25	-0.9	-0.87	-0.54	1.06	0.28	0.32	3.22	0.16	-1.03	0.94	-1.855	-0.31	0.2325	0.0695133	0.707699	0.828171	1	0.999631	0.941315
Camk2d_E9Q1T1_S280s_2	-0.8	3.5	3.91	-0.52	-1.85	1.08	-0.94	-0.38	1.03	1.86	1.04	0.57	5.62	1.6	1.23	1.7	-2.045	-0.3975	1.015	0.113076	0.720994	0.466301	1	0.999631	0.795267
Camk2d_E9Q1T1_S338s_1	0.42	-0.21	0.42	0.62	0.27	-0.38	1.2	0.82	0.31	-0.11	1.15	0.39	0.09	-0.14	1.27	1.09	0.165	0.1225	0.265	0.677238	0.730512	0.525755	1	0.999631	0.82353
Camk2d_E9Q1T1_S524s_1	-0.49	0.33	-0.45	0.07	-0.52	-1.03	-0.81	-0.32	0.17	-1.04	-0.53	-0.81	-0.01	0.82	-0.1	0.38	-0.535	-0.4175	0.4075	0.109045	0.265904	0.259295	1	0.999631	0.692624
Camk2d_E9Q1T1_S528s_1	-0.81	-0.5	0.87	0.47	-1.05	-0.72	0.16	1.65	-0.61	-0.47	1.84	1.5	-1.53	-1.27	0.59	1.82	0.0025	0.5575	-0.105	0.996905	0.417485	0.892396	1	0.999631	0.964421
Camk2d_E9Q1T1_T287t_1	0.97	2.18	3.11	1.35	0.51	1.96	1.23	1.16	0.82	1.75	2.04	0.71	1.34	1.51	0.28	1.68	-0.6875	-0.5725	-0.7	0.206788	0.303303	0.210283	1	0.999631	0.66441
Camk2g_Q923T9_S334s_1	1.23	-0.39	-0.38	0.35	0.2	-0.93	0.93	0.2	-0.39	-0.44	0.62	-0.91	-0.12	-0.19	-1.52	0.2	-0.1025	-0.4825	-0.61	0.839882	0.328634	0.251691	1	0.999631	0.687531
Camk2g_Q923T9_S349s_1	-0.02	0.71	0.19	0.18	0.05	0.77	0.28	0.42	0.22	-0.25	0.22	0.32	0.27	0.59	0.34	0.88	0.115	-0.1375	0.255	0.692042	0.636111	0.413787	1	0.999631	0.768655
Camk2g_Q923T9_T287t_1	1.14	2.06	2.56	1.45	0.51	1.82	1.23	1.38	0.61	1.69	2.03	0.82	1.04	1.09	0.92	1.8	-0.5675	-0.515	-0.59	0.193114	0.27351	0.161515	1	0.999631	0.631442
Camk4_P08414_S337s_1	-0.12	-1.72	-2.83	-1.03	-1.82	-1.82	-1.07	-1.34	-1.88	-2.48	-1.65	-3.6	-0.82	-2.98	-3.57	-1.44	-0.0875	-0.9775	-0.7775	0.873866	0.154334	0.316594	1	0.999631	0.720734
Camk4_P08414_T196t_1	-1.18	0.74	0.49	-0.14	-0.42	2.84	0.04	2.24	-1.05	-1.11	2.37	-1.95	-0.75	2.93	-0.48	-0.51	1.1975	-0.4125	0.32	0.155426	0.652251	0.706618	1	0.999631	0.898087
Camkk1_Q8VBY2_S458s_1	-0.84	0.72	0.32	-0.33	0.38	0.21	-0.06	-0.26	0.14	-0.6	0.65	0.16	0.29	0.02	-0.23	-0.34	0.1	0.12	-0.0325	0.795079	0.780545	0.934895	1	0.999631	0.979037
Camkk1_Q8VBY2_S475s_1	-1.31	1.13	0.33	0.63	0.39	0.37	0.14	0.53	0.59	0	0.58	0.89	0.56	0.2	0.81	0.7	0.1625	0.32	0.3725	0.746011	0.545775	0.476333	1	0.999631	0.799882
Camkk1_Q8VBY2_S492s_1	-1.81	0.62	-0.37	-0.48	0.23	-0.99	-0.36	-0.12	0.6	-2.1	-0.35	0.4	0.58	-0.48	-0.84	-0.4	0.2	0.1475	0.225	0.702005	0.834118	0.680826	1	0.999631	0.888714
Camkk1_Q8VBY2_S82s_1	0.26	0.48	-0.04	0.63	-0.52	-1.15	-0.18	-0.21	-0.88	-2.83	0.06	0.4	-1.2	0.65	-0.09	-0.5	-0.8475	-1.145	-0.6175	0.0224393	0.109269	0.167858	1	0.999631	0.637399
Camkk1_Q8VBY2_T108t_1	1.89	0.99	0.69	2.74	2.01	0.85	2.6	1.35	-0.13	-0.1	2.18	-1.99	-4.13	0.54	-0.35	-0.35	0.125	-1.5875	-2.65	0.820693	0.0862021	0.0203921	1	0.999631	0.393617
Camkk2_Q8C078_S129s_1	0.46	0.71	-1.11	0.44	0.67	0.55	0.17	0.02	0.64	-0.18	-0.54	0.06	-0.81	0.88	-0.01	0	0.2275	-0.13	-0.11	0.602667	0.781727	0.83037	1	0.999631	0.942193
Camkk2_Q8C078_S133s_1	-0.28	0.21	-0.49	0.99	-0.21	0.1	-0.22	0.64	-0.19	-0.86	-0.03	0.52	-0.15	-0.38	0.46	0.23	-0.03	-0.2475	-0.0675	0.93911	0.570553	0.866628	1	0.999631	0.956432
Camkk2_Q8C078_S495s_1	-1.19	-0.06	-0.28	-0.79	0.11	0	-0.16	-0.33	0.08	-0.96	0.5	0.1	0.45	-0.43	-0.62	-0.5	0.485	0.51	0.305	0.152928	0.232794	0.436624	1	0.999631	0.780748
Camkk2_Q8C078_S511s_1	0.42	1.41	0.65	0.38	0.72	1.35	0.92	1.27	0.71	0.47	1.2	1.41	0.94	1.28	0.8	1.63	0.35	0.2325	0.4475	0.297152	0.519934	0.226957	1	0.999631	0.678092
Camkk2_Q8C078_S522s_1	1.82	-2.11	-0.27	0.17	-0.91	0.31	2.5	-1.03	-1.74	2.1	0.57	-0.97	-2.73	-2.38	-0.89	-0.99	0.315	0.0875	-1.65	0.750784	0.931102	0.0659011	1	0.999631	0.516933
Camkk2_Q8C078_S572s_1	0.28	0.95	0.67	0.48	0.45	0.85	0.08	0.89	0.64	0.55	0.57	1.37	0.88	1.45	0.86	1.12	-0.0275	0.1875	0.4825	0.927053	0.549515	0.133414	1	0.999631	0.60492
Camkk2_Q8C078_S99s_1	0.87	-0.3	-0.96	0.87	1.28	-0.48	0.96	0.56	0.23	-0.25	0.54	-0.12	-1.15	0.62	-0.45	-0.16	0.46	-0.02	-0.405	0.408014	0.966076	0.463021	1	0.999631	0.793564
Camkv_Q3UHL1_S387s_1	-1.47	0.65	0.59	0.5	0.13	0.48	1.15	0.25	1.02	-0.75	1.14	0.78	0.54	-0.65	0.43	0.19	0.435	0.48	0.06	0.412749	0.441182	0.911748	1	0.999631	0.971848
Camkv_Q3UHL1_S392s_1	-0.1	-0.24	-0.04	0.05	-0.26	-0.34	0.43	-0.55	0.24	-0.01	0.33	0.35	-0.44	-0.87	-0.25	-0.68	-0.0975	0.31	-0.4775	0.738488	0.233541	0.114405	1	0.999631	0.579001
Camkv_Q3UHL1_S436s_1	3	0.71	0.72	1.75	0.29	1.2	2.53	0.73	1.31	2.22	1.27	0.56	-0.78	-0.07	0.65	0.61	-0.3575	-0.205	-1.4425	0.585088	0.727214	0.0314159	1	0.999631	0.441911
Camkv_Q3UHL1_S436s_2	0.77	1.93	2.17	1.21	0.51	-0.19	1.98	0.57	1.59	1.63	1.44	1.21	1.55	-0.7	-0.88	0.94	-0.8025	-0.0525	-1.2925	0.145416	0.885947	0.0592524	1	0.999631	0.504286
Camkv_Q3UHL1_S506s_1	3.61	-0.23	-2.4	-0.48	1.51	-0.15	0.8	-1.63	0.14	-0.97	-0.67	-1.26	-1.29	-1.05	-0.68	-0.16	0.0075	-0.815	-0.92	0.995089	0.469853	0.407633	1	0.999631	0.766996
Camkv_Q3UHL1_T430t_1	-0.81	-0.35	-0.93	-0.65	-0.36	-0.11	-0.78	-0.26	-0.55	-0.87	-1.39	-0.8	-0.26	0.19	-0.7	-0.69	0.3075	-0.2175	0.32	0.281236	0.46931	0.336588	1	0.999631	0.730499
Camkv_Q3UHL1_T438t_1	2.42	-0.35	0.25	0.36	-0.38	0.39	1.49	-0.34	-0.61	1.16	-0.24	-1.14	-1.74	-1.03	-0.64	-1.11	-0.38	-0.8775	-1.8	0.570322	0.225597	0.0115977	1	0.999631	0.385092
Camkv_Q3UHL1_T438t_2	0.54	0.84	-0.83	-0.55	-0.19	-0.77	-0.53	-0.7	0.75	1.09	-0.6	-0.81	0.6	-1.29	-1.62	-0.72	-0.5475	0.1075	-0.7575	0.214604	0.851755	0.213851	1	0.999631	0.667209
Camkv_Q3UHL1_T441t_1	1.59	-0.28	1.07	-0.19	-1.52	0.42	0.95	-0.48	-1.2	1.53	-0.32	-0.74	0.94	-1.06	-0.88	-0.5	-0.705	-0.73	-0.9225	0.285217	0.296146	0.143277	1	0.999631	0.614578
Camkv_Q3UHL1_T441t_2	1.01	-0.12	2.12	1.18	-0.66	-1.24	1.92	0.52	0.04	1.56	1.36	1.14	-0.53	-2.47	-1	0.84	-0.9125	-0.0225	-1.8375	0.233748	0.9663	0.0279331	1	0.999631	0.423977
Camkv_Q3UHL1_T446t_1	-0.31	-0.3	-0.66	-0.87	-0.46	-0.53	-1.05	-0.73	-0.44	-0.35	-0.8	-0.68	0.09	-0.12	-0.89	-0.36	-0.1575	-0.0325	0.215	0.572632	0.90627	0.51725	1	0.999631	0.819449
Camkv_Q3UHL1_T446t_2	-1.46	-1.78	-1.46	-0.9	-1.39	-2.17	-0.98	-0.83	-1.66	-2.26	-0.74	-1.03	-0.96	-1.17	-1.41	-0.69	0.0575	-0.0225	0.3425	0.87648	0.95491	0.300165	1	0.999631	0.713499
Camkv_Q3UHL1_T470t_1	-0.32	-0.4	-0.38	-0.54	-0.01	-0.38	-0.51	0.03	-0.09	-0.39	-0.52	-0.48	-0.53	0.28	-0.34	0	0.1925	0.04	0.2625	0.457008	0.873563	0.385528	1	0.999631	0.756126
Camsap1_A0A0A0MQE5_S1069s_1	-0.68	-0.83	-0.56	0.01	0.6	-0.43	-0.18	-0.4	0.07	-1.24	-0.52	0.2	0.29	-0.86	-0.75	-0.02	0.4125	0.1425	0.18	0.241389	0.717366	0.632573	1	0.999631	0.868271
Camsap1_A0A0A0MQE5_S1133s_1	0.46	-0.93	0.33	0.42	0.36	-0.4	-0.17	2.26	-0.23	-0.55	-0.09	-0.69	-1.39	-0.54	-0.55	-0.76	0.4425	-0.46	-0.88	0.481625	0.247468	0.053206	1	0.999631	0.490801
Camsap1_A0A0A0MQE5_S1407s_1	-0.09	1.11	-0.23	0.82	1.34	-0.33	0.36	0.82	1.91	-0.9	1.2	0.91	0.71	-0.66	0.13	0.85	0.145	0.3775	-0.145	0.755217	0.546192	0.757158	1	0.999631	0.914382
Camsap1_A0A0A0MQE5_S550s_1	-1.25	-1.02	0.45	-1.04	-1.6	-0.78	-0.97	-0.45	-0.52	-0.61	-1.08	-0.3	0.08	-1.44	-0.42	-0.58	-0.235	0.0875	0.125	0.600899	0.83725	0.79749	1	0.999631	0.930124
Camsap1_A0A0A0MQE5_S550s_2	-0.53	-0.16	-0.72	-0.62	-0.02	0.58	-0.03	0.49	0.56	0.39	0.65	0.15	0.87	-0.16	-1.47	0.4	0.7625	0.945	0.4175	0.0212227	0.00587409	0.411064	1	0.999631	0.767937
Camsap1_A0A0A0MQE5_S553s_1	1.43	-1.31	-0.77	1.51	1.09	0.6	0.86	1.17	-0.02	0.19	0.52	0.08	-0.39	0.96	0.47	0.94	0.715	-0.0225	0.28	0.295656	0.973003	0.69301	1	0.999631	0.894912
Camsap1_A0A0A0MQE5_S553s_2	-0.53	-0.16	-0.72	-0.62	-0.02	0.58	-0.03	0.49	0.56	0.39	0.65	0.15	0.87	-0.16	-1.47	0.4	0.7625	0.945	0.4175	0.0212227	0.00587409	0.411064	1	0.999631	0.767937
Camsap1_A0A0A0MQE5_S626s_1	1.88	-0.13	-1.05	1.3	1.34	0.06	0.86	1.02	0.7	0.5	0.9	0.17	-0.69	0.38	-0.11	0	0.32	0.0675	-0.605	0.62157	0.913348	0.351286	1	0.999631	0.738069
Camsap1_A0A0A0MQE5_S718s_1	-0.63	-0.76	-1.39	-1.64	-0.17	-0.59	-0.66	-1.06	-1.24	-1.2	-0.76	-1.24	-0.81	-0.91	-1.27	-1.74	0.485	-0.005	-0.0775	0.175463	0.98774	0.83279	1	0.999631	0.94321
Camsap1_A0A0A0MQE5_T559t_1	0.97	-0.09	-0.64	1.13	1.4	0.28	0.7	1.14	0.67	-0.01	1.24	0.04	-0.45	0.83	0.57	0.82	0.5375	0.1425	0.1	0.268146	0.772826	0.841496	1	0.999631	0.947343
Camsap1_V9GXD7_S104s_1	0.63	0.57	1.25	1.16	0.82	1.51	0.91	1.28	0.56	0.82	1.3	1.38	0.17	1.01	1.66	1.72	0.2275	0.1125	0.2375	0.456487	0.727187	0.571928	1	0.999631	0.844031
Camsap2_H7BX08_S1009s_1	0.52	1.5	0.51	0.5	0.64	0.65	0.18	1.03	0.94	0.55	0.66	0.97	0.58	0.84	0.89	1.31	-0.1325	0.0225	0.1475	0.696529	0.944695	0.673371	1	0.999631	0.885515
Camsap2_H7BX08_S1302s_1	0.27	0.09	0.73	0.64	0.68	0.09	0.46	0.68	0.21	-0.22	0.83	0.45	-0.84	0.37	0.47	0.7	0.045	-0.115	-0.2575	0.873874	0.723229	0.525001	1	0.999631	0.822727
Camsap2_H7BX08_S1308s_1	-0.13	0.95	0.3	-0.14	0.45	0.43	-0.4	0.21	0.49	0.56	0.52	0.65	0.72	1.03	0.56	0.8	-0.0725	0.31	0.5325	0.836985	0.34343	0.140392	1	0.999631	0.611934
Camsap2_H7BX08_S408s_1	0.07	1.06	-0.15	0.72	0.96	1.24	0.57	1.13	0.54	-0.2	0.89	0.83	-1.48	1.29	0.18	0.85	0.55	0.09	-0.215	0.137608	0.818647	0.724507	1	0.999631	0.905674
Camsap2_H7BX08_S589s_1	-0.61	-0.23	-0.23	-0.42	-0.96	-0.8	-0.88	-0.31	-0.21	-0.78	-0.3	-0.25	0.7	-0.46	0.43	0.11	-0.365	-0.0125	0.5675	0.193612	0.96312	0.114288	1	0.999631	0.579001
Camsap2_H7BX08_S590s_1	-0.29	-0.02	-0.08	-0.44	-0.51	-0.84	-0.68	-0.49	-0.35	-0.23	-0.39	-0.1	0.42	-0.43	-0.43	-0.43	-0.4225	-0.06	-0.01	0.114754	0.81352	0.974929	1	0.999631	0.991108
Camsap2_H7BX08_S674s_1	2.04	-0.48	-0.51	1.5	0.16	0.16	1.6	0.77	-0.63	-0.06	-0.29	-0.28	-2.04	-1.26	0.33	-0.08	0.035	-0.9525	-1.4	0.957921	0.143404	0.0870925	1	0.999631	0.553514
Camsap2_H7BX08_S853s_1	1.34	0.34	-0.5	1.89	1.5	0.53	1.66	2.17	1.08	0.52	1.96	1.1	-1.41	0.92	0.87	1.26	0.6975	0.3975	-0.3575	0.243216	0.484515	0.619823	1	0.999631	0.861888
Camsap2_H7BX08_S922s_1	-1.28	0.41	-0.24	-0.98	-0.49	-0.4	-0.96	-0.94	-0.51	-1.02	-0.48	-0.38	0.24	0.25	0.33	-0.49	-0.175	-0.075	0.605	0.669474	0.855825	0.183358	1	0.999631	0.644372
Camsap3_Q80VC9_S1095s_1	1.59	0.98	0.29	1.07	1.21	1.23	0.32	1.57	1.29	1.07	0.97	0.77	0.21	1.28	0.63	1.24	0.1	0.0425	-0.1425	0.796663	0.899372	0.720347	1	0.999631	0.904858
Camsap3_Q80VC9_S345s_1	0.01	1.18	0.1	0.62	1.54	1.01	1.12	0.15	1.88	0.18	1.64	1.25	0.73	0.69	1.63	0	0.4775	0.76	0.285	0.251587	0.118158	0.51734	1	0.999631	0.819449
Camsap3_Q80VC9_S346s_1	-4.61	-1.76	1.37	1.24	0.63	0.16	1.37	2.41	0.67	-1.09	2.71	1.27	-0.85	-0.68	2.44	1.64	2.0825	1.83	1.5775	0.128278	0.206603	0.270229	1	0.999631	0.698438
Camsap3_Q80VC9_S359s_1	-1.63	-0.94	0.03	-1.43	-2.04	-2.13	-1.17	-0.68	-0.74	-0.58	-0.74	-0.66	-1.29	-0.38	0.55	-0.49	-0.5125	0.3125	0.59	0.302428	0.430505	0.258857	1	0.999631	0.692624
Camsap3_Q80VC9_S380s_1	-1.45	-0.28	1.45	-0.8	0.99	-0.8	0.28	0.66	-0.05	0.05	-0.28	-0.39	0.46	-0.4	1.48	-0.69	0.5525	0.1025	0.4825	0.407142	0.85913	0.496162	1	0.999631	0.811209
Camsap3_Q80VC9_S443s_1	1.17	0.37	-0.54	0.92	1.1	0.13	0.62	0.49	0.62	0.32	0.33	0.01	-0.74	0.53	-0.09	0.55	0.105	-0.16	-0.4175	0.804196	0.695726	0.389022	1	0.999631	0.758181
Camsap3_Q80VC9_S560s_1	-1.08	-0.79	-0.88	-1.06	-0.89	-1.1	-1.21	-0.99	-1.17	-0.89	-1.21	-0.3	0.25	-0.71	-0.5	-0.69	-0.095	0.06	0.54	0.693572	0.840921	0.115517	1	0.999631	0.580709
Camsap3_Q80VC9_S598s_1	-0.71	-0.29	-0.52	-0.55	-0.29	-0.61	-0.92	-0.39	-0.43	-0.64	-0.55	-0.32	-0.39	0.38	-0.09	0.11	-0.035	0.0325	0.52	0.894499	0.897517	0.102857	1	0.999631	0.565572
Camsap3_Q80VC9_S779s_1	0.9	0.06	-0.58	-0.17	0.41	0.04	0.06	0.1	0.59	0.34	0.17	-0.28	-0.35	0.15	-0.33	-0.05	0.1	0.1525	-0.1975	0.776642	0.691312	0.600219	1	0.999631	0.856618
Camsap3_Q80VC9_S785s_1	1.33	0.46	0.2	0.36	1.55	0.31	0.03	1.29	1.66	1.39	0.45	1.69	1.25	-0.25	1.97	1.79	0.2075	0.71	0.6025	0.636666	0.0997877	0.27167	1	0.999631	0.699288
Camsap3_Q80VC9_S824s_1	-0.04	-0.26	-0.26	0.07	-0.24	-0.36	0.09	1.34	-0.17	0.05	1.03	2	0.29	0.2	1.28	1.36	0.33	0.85	0.905	0.419563	0.103835	0.0310566	1	0.999631	0.44065
Camsap3_Q80VC9_T842t_1	0.11	1.02	0.92	0.37	0.3	1.15	-0.06	0.53	0.73	0.87	0.27	0.91	1.21	1.39	0.74	1.19	-0.125	0.09	0.5275	0.728531	0.779843	0.13474	1	0.999631	0.606296
Camta1_A2A891_S1228s_1	-0.4	0.54	0.1	-0.18	-0.73	-0.87	0.06	0.54	-0.84	0.36	-0.46	0.22	-1.29	0.49	0.31	0.16	-0.265	-0.195	-0.0975	0.508642	0.604621	0.829709	1	0.999631	0.942058
Cand1_Q6ZQ38_S1219s_1	0.02	1.69	1.98	2.02	0.28	0.72	1.6	2.64	1.58	0.36	3.04	1.92	1.59	1.66	2.23	0.84	-0.1175	0.2975	0.1525	0.85255	0.650841	0.770878	1	0.999631	0.919413
Cand1_Q6ZQ38_S1220s_1	0.12	-1.17	0.17	-0.36	-1.48	-0.47	-1.01	-0.04	0.23	-1.63	0.77	0.15	0.49	-1.66	0.31	-0.13	-0.44	0.19	0.0625	0.322377	0.735227	0.90798	1	0.999631	0.96989
Cand1_Q6ZQ38_S1226s_1	-0.5	-1.06	-0.52	-1.21	-0.43	-0.46	0.61	-1.12	-0.94	-1.36	-0.88	-1.27	-1.09	-1.26	-2.18	-0.71	0.4725	-0.29	-0.4875	0.259418	0.341502	0.231013	1	0.999631	0.681463
Cand1_Q6ZQ38_S1230s_1	-0.85	-1.27	-1.8	-2.12	-1.12	-1.25	-1.33	-2.25	-1.4	-1.13	-2.27	-1.85	-0.85	-1.7	-1.53	-1.93	0.0225	-0.1525	0.0075	0.953984	0.69885	0.984768	1	0.999631	0.995133
Cand1_Q6ZQ38_S558s_1	-0.66	-0.43	-0.87	-0.88	-0.64	-0.3	-1.37	-0.72	-1.17	-0.63	-0.42	0.47	0.2	-0.31	-0.67	-0.46	-0.0475	0.2725	0.4	0.876573	0.479037	0.214644	1	0.999631	0.66742
Cand1_Q6ZQ38_T1229t_1	-0.85	-1.27	-1.8	-2.12	-1.12	-1.25	-1.33	-2.25	-1.4	-1.13	-2.27	-1.85	-0.85	-1.7	-1.53	-1.93	0.0225	-0.1525	0.0075	0.953984	0.69885	0.984768	1	0.999631	0.995133
Canx_P35564_S563s_1	-0.45	0.95	0.39	-0.2	-0.06	1.39	-0.39	0.27	0.82	1.78	0.04	0.15	0.43	0.56	0.09	0.07	0.13	0.525	0.115	0.7839	0.294984	0.759937	1	0.999631	0.914614
Canx_P35564_S582s_1	-0.66	-1.21	-0.79	-0.29	-0.75	-1.36	-0.98	-0.26	-0.59	-0.57	-0.31	-0.36	0.24	-0.62	-0.64	-0.14	-0.1	0.28	0.4475	0.766269	0.345477	0.214011	1	0.999631	0.667209
Cap1_P40124_S307s_1	-0.61	-3.99	1.64	1	-1.86	-2.85	1.87	0.14	-2.26	-2.21	-0.44	0.13	-2.32	-3.03	1.1	-0.14	-0.185	-0.705	-0.6075	0.894334	0.559849	0.64997	1	0.999631	0.875355
Cap1_P40124_S309s_1	0.76	-0.95	1.62	0.35	0.76	0.53	1.62	0.15	0.8	0.34	-0.77	0.4	-0.53	0.5	0.97	-0.88	0.32	-0.2525	-0.43	0.574415	0.664511	0.494938	1	0.999631	0.810518
Cap1_P40124_S34s_1	-0.61	-0.5	-0.75	-0.7	-0.84	-0.86	-0.63	-0.93	-0.88	-0.19	-1.17	-0.61	-0.4	-0.4	-1.05	-0.58	-0.175	-0.0725	0.0325	0.465872	0.806533	0.909876	1	0.999631	0.970597
Cap2_D3YTR7_S145s_1	2.67	1.33	2.19	2.01	0.11	1.96	2.39	0.47	1.13	2.84	1.46	0.68	0.33	0.75	0.98	0.99	-0.8175	-0.5225	-1.2875	0.171934	0.32035	0.00511495	1	0.999631	0.351308
Cap2_D3YTR7_S149s_1	-0.12	0.59	0.6	0.47	-0.36	0.58	-0.26	0.36	0.8	0.89	0.34	0.76	-0.31	-0.1	0.73	0.92	-0.305	0.3125	-0.075	0.364858	0.300897	0.844604	1	0.999631	0.94856
Cap2_D3YTR7_S199s_1	0.98	2.28	2.36	-0.37	3.62	1.11	2.91	1.06	5.23	1.05	3.54	3.21	5.19	1.01	1	0.69	0.8625	1.945	0.66	0.293996	0.0599809	0.540127	1	0.999631	0.831295
Cap2_D3YTR7_T198t_1	-0.39	3.12	3.11	0.25	3.67	1.33	3.34	1.49	4.93	0.51	3.86	4.58	4.97	1.24	2.24	0.91	0.935	1.9475	0.8175	0.341236	0.122639	0.468136	1	0.999631	0.795565
Capn5_O08688_T44t_1	0.42	0.2	0.18	0.55	-0.15	0.34	0.1	0.21	1.15	0.97	0.26	0.28	1.45	0.03	0.82	0.79	-0.2125	0.3275	0.435	0.409771	0.30933	0.24005	1	0.999631	0.683719
Capza2_P47754_T63t_1	-0.39	1.5	0.71	0.4	1.15	1.61	-0.02	0.39	0.52	0.8	0.66	1.44	1.49	1.21	0.67	0.95	0.2275	0.3	0.525	0.652168	0.497798	0.244729	1	0.999631	0.685751
Capzb_P47757_S263s_1	1.34	1.1	0.42	0.75	1.88	1.27	0.37	1.61	1.19	1.14	0.56	1.54	0.9	1.77	1.75	1.5	0.38	0.205	0.5775	0.345542	0.544371	0.119157	1	0.999631	0.586721
Carhsp1_Q9CR86_S31s_1	-1.37	1.98	1.41	0.05	1.75	1.56	0.46	0.85	1.64	-0.75	0.34	0.72	2.56	2.01	1.22	0.69	0.6375	-0.03	1.1025	0.381086	0.969615	0.164504	1	0.999631	0.632897
Carhsp1_Q9CR86_S42s_1	0.6	1.03	-0.67	0.27	0.83	0.52	-0.33	0.28	0.81	0.72	-0.32	-0.67	0.08	1.11	-0.36	-0.54	0.0175	-0.1725	-0.235	0.967432	0.727162	0.637466	1	0.999631	0.870011
Carhsp1_Q9CR86_S53s_1	0.73	1.32	1.34	1.19	1.02	1.01	0.21	1.51	0.47	1.2	0.36	0.81	-0.39	1.67	1.15	1.14	-0.2075	-0.435	-0.2525	0.545236	0.178558	0.586847	1	0.999631	0.849744
Cars_Q9ER72_S19s_1	-0.39	-1.3	-0.52	-1.3	-1.88	-3.01	-1.16	-2.07	-2.34	-1.46	-1.79	-1.03	-2.38	-2.24	-1.19	-0.8	-1.1525	-0.7775	-0.775	0.0246805	0.0689487	0.113494	1	0.999631	0.57792
Cars_Q9ER72_S307s_1	-0.76	1.2	1.34	0.18	0.38	0.08	-0.18	0.17	-0.14	-0.15	0.67	1.15	0.87	0.25	0.6	0.63	-0.3775	-0.1075	0.0975	0.437318	0.843355	0.84197	1	0.999631	0.947766
Cartpt_P56388_S48s_1	-1.46	-0.84	-0.45	-1.21	-0.26	-0.94	-0.86	-1.49	0.06	-1.95	-0.39	0.93	0.58	-0.27	0.77	-0.65	0.1025	0.6525	1.0975	0.775532	0.282481	0.0238237	1	0.999631	0.415644
Casc3_Q8K3W3_S262s_1	-0.74	0.85	-0.81	-0.17	0.37	-1.83	-0.96	0.03	-0.19	-1.01	1.02	0.68	0.86	0.5	1.02	0.08	-0.38	0.3425	0.8325	0.511913	0.538969	0.08269	1	0.999631	0.548633
Casc3_Q8K3W3_S44s_1	-1.39	-2.82	-0.75	-0.65	-3.06	-2.58	-0.3	0.62	-2.23	-2.34	-0.29	-1.13	-1.79	-0.89	0.78	-0.73	0.0725	-0.095	0.745	0.934421	0.880176	0.271367	1	0.999631	0.699267
Casc4_E9PZJ6_S231s_1	-0.13	1.09	0.99	0	0.72	0.55	1.35	-0.44	2.23	-0.06	0.86	3.17	2.71	0.12	-0.48	0.73	0.0575	1.0625	0.2825	0.902144	0.152105	0.678804	1	0.999631	0.887183
Casc4_E9PZJ6_S232s_1	-0.13	1.09	0.99	0	0.72	0.55	1.35	-0.44	2.23	-0.06	0.86	3.17	2.71	0.12	-0.48	0.73	0.0575	1.0625	0.2825	0.902144	0.152105	0.678804	1	0.999631	0.887183
Cask_O70589_S571s_1	-0.83	-0.24	-0.36	-0.69	-0.51	-0.57	-0.84	-0.64	-0.42	-0.73	-0.87	-0.5	0.46	-0.67	-0.71	-0.71	-0.11	-0.1	0.1225	0.673958	0.717346	0.738511	1	0.999631	0.90804
Cask_O70589_S582s_1	0.21	-0.53	0.37	-1.28	-1.35	0.56	2.64	-2.36	-0.74	0.59	-0.61	-0.43	0.11	-2.42	-1.27	-2.46	0.18	0.01	-1.2025	0.857616	0.982969	0.0856586	1	0.999631	0.551124
Cask_O70589_S583s_1	-0.48	-1.18	0.06	-0.38	-0.81	-1.16	-0.25	-0.38	-0.94	-0.8	-1.36	-0.21	-0.84	-1.36	-0.68	0.24	-0.155	-0.3325	-0.165	0.664839	0.385055	0.701688	1	0.999631	0.896835
Cask_O70589_T182t_1	-0.37	-0.96	-0.2	-0.32	-0.49	-1.22	-0.39	0.11	-1.1	-0.99	0.61	0.04	1.32	-0.72	-0.09	-0.36	-0.035	0.1025	0.5	0.920556	0.816365	0.300186	1	0.999631	0.713499
Caskin1_Q6P9K8_S1012s_1	0	-1.46	-1.31	-0.35	-0.15	-0.98	-0.24	-0.38	-0.98	-0.74	-0.87	-1.08	-0.48	-1.25	-1.18	-0.53	0.3425	-0.1375	-0.08	0.407362	0.721671	0.850396	1	0.999631	0.949525
Caskin1_Q6P9K8_S1188s_1	-0.24	0.41	0.98	-0.05	0.01	0.24	-0.12	0.55	-0.08	0.15	0.19	0.66	0.37	0.49	0.44	1.3	-0.105	-0.045	0.375	0.759624	0.89804	0.339438	1	0.999631	0.732185
Caskin1_Q6P9K8_S1233s_1	-0.47	-2.24	0	-0.15	-0.83	-0.58	-0.98	-0.52	-0.35	-1.07	-0.37	-0.14	-0.81	-1.29	0.25	-0.3	-0.0125	0.2325	0.1775	0.979898	0.657312	0.754833	1	0.999631	0.913582
Caskin1_Q6P9K8_S1288s_1	0.21	-0.73	-0.16	-0.94	-0.29	-0.01	-0.39	0.05	-0.38	0.08	1.32	-1.29	-0.2	0.51	-0.56	0.15	0.245	0.3375	0.38	0.460495	0.54879	0.333983	1	0.999631	0.72834
Caskin1_Q6P9K8_S1330s_1	-1.6	0.32	-1.27	-1.99	0.72	-4.08	-1.04	-1.78	-0.13	-0.4	-1.01	-1.32	0.72	-3.3	-0.7	-1.28	-0.41	0.42	-0.005	0.671318	0.441212	0.995277	1	0.999631	0.997705
Caskin1_Q6P9K8_S358s_1	-0.56	-0.01	-0.25	-0.74	-0.09	-0.2	-0.45	-0.69	-0.29	-1	-0.3	-0.32	-0.1	0.06	-0.19	0.11	0.0325	-0.0875	0.36	0.909443	0.776388	0.236516	1	0.999631	0.683301
Caskin1_Q6P9K8_S390s_1	1.86	-0.68	-0.68	1.39	1.61	0.27	1.32	1.61	-0.22	-0.99	1.35	0.26	-1.43	-0.14	1.02	0.6	0.73	-0.3725	-0.46	0.286043	0.615162	0.546234	1	0.999631	0.834213
Caskin1_Q6P9K8_S423s_1	1.3	0.7	-0.7	0.88	1.1	0.38	0.96	0.35	0.24	-0.48	-0.08	-0.32	-0.08	-0.42	-0.81	0.1	0.1525	-0.705	-0.8475	0.739087	0.142639	0.0949034	1	0.999631	0.558128
Caskin1_Q6P9K8_S432s_1	-0.14	0.42	0.39	-0.51	-0.36	0.44	-0.73	-0.81	0.17	0.29	-0.47	0.04	0.44	0.61	-0.03	-0.6	-0.405	-0.0325	0.065	0.298245	0.921747	0.86591	1	0.999631	0.955982
Caskin1_Q6P9K8_S579s_1	-0.65	-0.23	-0.51	-0.3	-0.03	-0.25	-0.64	-0.63	-0.09	-0.1	-1.06	-0.96	0.03	-0.55	-0.54	0.19	0.035	-0.13	0.205	0.896906	0.696825	0.512339	1	0.999631	0.818048
Caskin1_Q6P9K8_S720s_1	0.4	-0.75	-0.29	0.29	-0.58	1.21	-0.25	-0.16	0.47	0.65	-0.05	0.23	-0.67	0.42	-0.15	0.05	0.1425	0.4125	2.35514e-16	0.756448	0.253508	1	1	0.999631	1
Caskin1_Q6P9K8_S750s_1	0.92	-0.21	-1.24	0.88	0.96	0.59	0.77	0.92	-0.18	-0.89	-0.26	-0.63	-1.75	0.12	-0.86	-0.23	0.7225	-0.5775	-0.7675	0.163916	0.273595	0.21972	1	0.999631	0.670699
Caskin1_Q6P9K8_S757s_1	2.23	-1.31	-0.45	1.09	1.94	-0.4	1.65	0.6	0.05	-1.25	0.03	-0.32	-1.46	-0.57	-0.2	-0.56	0.5575	-0.7625	-1.0875	0.506461	0.32115	0.161042	1	0.999631	0.631211
Caskin1_Q6P9K8_S820s_1	2.11	1.11	2.27	2.21	0.58	1.2	2.42	1.03	0.49	2.17	1.92	1.59	-0.8	-0.85	-0.03	1.36	-0.6175	-0.3825	-2.005	0.200148	0.405733	0.0040834	1	0.999631	0.351308
Caskin1_Q6P9K8_S822s_1	2	0.07	1.09	1.6	0.47	1.47	1.73	0.05	0.66	1.96	-0.15	-0.68	-1.87	-0.32	0.28	-0.16	-0.26	-0.7425	-1.7075	0.62807	0.263047	0.013468	1	0.999631	0.385092
Caskin1_Q6P9K8_S918s_1	1.16	0.81	0.66	2.07	0.14	0.78	-0.91	1.61	-0.14	2.54	0.65	0.1	0.38	1.93	1.57	2.68	-0.77	-0.3875	0.465	0.194071	0.536228	0.39636	1	0.999631	0.760744
Caskin1_Q6P9K8_S965s_1	2.85	-1.47	-0.49	1.1	0.59	0.36	1.52	0	0.35	0.41	-1.31	-1.71	-2.93	-0.42	-1.15	-1.61	0.12	-1.0625	-2.025	0.889988	0.278853	0.0513391	1	0.999631	0.489777
Caskin1_Q6P9K8_T1197t_1	-0.16	1.73	1.59	-0.49	1.52	0.81	1.15	0.13	2.45	-0.33	2.61	3.03	3.14	0.68	2.05	0.23	0.235	1.2725	0.8575	0.69057	0.152958	0.280807	1	0.999631	0.701922
Caskin1_Q6P9K8_T670t_1	0.25	0.26	0.37	0.55	0.53	0.72	0.26	0.75	0.15	-0.15	0.01	-0.03	-0.56	0.81	0.12	-0.16	0.2075	-0.3625	-0.305	0.417483	0.165472	0.395825	1	0.999631	0.76043
Caskin1_Q6P9K8_T708t_1	-0.16	-0.11	-0.06	-0.26	-0.02	0.12	-0.45	0.05	-0.29	-0.13	-0.18	-0.03	-0.16	0.11	0.08	0.39	0.0725	-0.01	0.2525	0.774169	0.966967	0.365086	1	0.999631	0.745324
Caskin1_Q6P9K8_T745t_1	1.86	-0.02	-0.98	0.02	1.01	0.17	-0.07	-0.26	0.43	-1.35	-0.27	-1.2	-5.82	0.22	-0.52	-0.55	-0.0075	-0.8175	-1.8875	0.989915	0.229296	0.162735	1	0.999631	0.631442
Caskin1_Q6P9K8_T759t_1	2.74	0.19	-1.17	1.43	2.71	1	2.54	2.16	1.32	-0.38	1.1	0.26	-3.56	-0.2	-0.01	0.23	1.305	-0.2225	-1.6825	0.129245	0.783936	0.131369	1	0.999631	0.603456
Caskin1_Q6P9K8_T996t_1	2.09	0.9	0.67	2	2.37	1.39	1.51	1.63	1.56	0.43	1.3	1.82	0.47	1.72	1.53	1.19	0.31	-0.1375	-0.1875	0.469927	0.766342	0.681692	1	0.999631	0.88924
Caskin1_Q6P9K8_Y457y_1	0.21	-1.44	-2.56	-0.95	-0.09	-1.42	-1.22	-1.54	-1.38	-0.88	-1.68	-0.93	-1.5	-0.72	-4	-1.63	0.1175	-0.0325	-0.7775	0.844655	0.953586	0.340301	1	0.999631	0.733032
Caskin2_Q8VHK1_S694s_1	-0.38	-0.93	-0.35	-0.44	-1.07	-0.96	-0.45	-0.24	-1.64	-0.6	-0.32	0.12	-0.66	-1.85	-0.4	-0.52	-0.155	-0.085	-0.3325	0.610763	0.834677	0.40415	1	0.999631	0.765215
Casp3_P70677_S26s_1	-0.16	-0.24	-0.63	-0.02	0.48	-0.09	-0.1	0.01	0.07	-0.02	0.36	0.36	0.21	0.45	-0.03	-0.03	0.3375	0.455	0.4125	0.239004	0.118563	0.178572	1	0.999631	0.642903
Cast_Q921U7_S117s_1	-2.01	-0.67	-2.39	-1.76	-1.98	-1.22	-2.12	-2.39	-1.63	-1.19	-2.65	-1.81	-1.02	-0.82	-1.87	-2.31	-0.22	-0.1125	0.2025	0.616017	0.80896	0.681394	1	0.999631	0.889229
Cbfa2t2_O70374_S235s_1	0.43	0.66	1.72	0.67	0.3	0.49	0.64	1.13	0.45	0.75	0.23	0.92	0.32	0.8	1.79	1.39	-0.23	-0.2825	0.205	0.52924	0.440384	0.641559	1	0.999631	0.871335
Cbfa2t2_O70374_S380s_1	0.34	2.25	1.45	-0.41	2.55	0.33	3.1	0	3.63	0.15	0.91	3.55	1.78	-0.03	-0.33	-0.68	0.5875	1.1525	-0.7225	0.494129	0.234346	0.322746	1	0.999631	0.724485
Cbfa2t2_O70374_S522s_1	0.67	0.02	0.9	-0.17	-1.4	0.24	0.82	0.51	-0.61	1.09	0.65	-1.12	-0.77	-0.65	1.16	0.12	-0.3125	-0.3525	-0.39	0.550098	0.517771	0.436576	1	0.999631	0.780748
Cbl_P22682_S617s_1	-1.5	-0.44	-0.48	-0.09	-1.06	-1.11	-0.19	0.25	-0.24	-0.45	-0.08	1.59	-0.08	-0.39	3.53	-0.62	0.1	0.8325	1.2375	0.82021	0.1358	0.183441	1	0.999631	0.644372
Cbl_P22682_S861s_1	-1.25	-0.83	-1.08	-1.11	0.22	-0.22	-0.65	-0.41	0.08	-0.12	-0.46	-0.76	0.29	0.73	-0.28	-0.89	0.8025	0.7525	1.03	0.016748	0.0256501	0.0234053	1	0.999631	0.41509
Cbx3_D3Z313_S93s_1	-0.05	-2	1.2	1.47	-1.89	-1.83	1.02	-0.61	-2.47	-1.1	0.25	-1.46	-2.93	-2.42	-0.04	-1.47	-0.9825	-1.35	-1.87	0.292327	0.135564	0.0549935	1	0.999631	0.492066
Cbx3_D3Z313_S95s_1	1.49	1.28	2.51	2.59	0.22	1.31	2.13	1.06	1.34	2.06	1.23	2.56	0.91	0.66	1.19	1.56	-0.7875	-0.17	-0.8875	0.132142	0.708035	0.0518518	1	0.999631	0.489777
Cbx5_Q61686_S110s_1	0.89	0.61	1.04	0.73	-0.63	0.61	0.75	-0.43	0.42	1.07	0.82	1.05	0.81	-0.59	0.34	0.33	-0.7425	0.0225	-0.595	0.0743521	0.935393	0.120956	1	0.999631	0.588397
Cbx5_Q61686_S92s_1	-1.03	0.16	0.07	-0.1	-0.55	-0.56	-0.5	-0.35	-0.44	-0.29	0.01	0.03	0.82	-0.4	-0.18	0.43	-0.265	0.0525	0.3925	0.421082	0.877813	0.349818	1	0.999631	0.736956
Cby1_Q9D1C2_S20s_1	-0.22	-0.15	-0.63	0.24	-0.45	-0.41	0.05	-0.32	-0.83	-0.15	-0.95	-1.28	-1.16	0.23	-0.48	0.16	-0.0925	-0.6125	-0.1225	0.747338	0.0977111	0.757803	1	0.999631	0.914449
Cby1_Q9D1C2_S9s_1	-1.31	-0.51	-0.2	0.09	0.42	0.25	-0.18	-0.18	-0.38	-1.21	-1.29	0.73	0.5	1.16	-0.59	-0.33	0.56	-0.055	0.6675	0.144871	0.916276	0.189498	1	0.999631	0.648674
Cc2d1a_E9PX94_S267s_1	-1.01	-0.29	-0.71	-0.03	-0.76	-0.96	-0.18	0.47	-0.41	-0.42	-0.9	-0.05	0.05	-0.23	-0.13	-0.05	0.1525	0.065	0.42	0.700345	0.844235	0.20199	1	0.999631	0.658952
Cc2d1a_E9PX94_S390s_1	-1.32	1.44	1.47	-0.26	1.36	1.36	0.82	0.4	1.78	0.37	1.03	1.26	1.97	0.73	1.53	0.67	0.6525	0.7775	0.8925	0.325091	0.260286	0.204213	1	0.999631	0.659781
Ccar2_Q8VDP4_S298s_1	-2.56	-2.35	1.03	0.52	-1.73	-3	0.22	0.66	-2.31	-2.5	0.32	0.06	-2.68	-2.62	1.33	0.88	-0.1225	-0.2675	0.0675	0.910302	0.796611	0.955678	1	0.999631	0.984649
Ccar2_Q8VDP4_S612s_1	-1.26	1.12	3.51	1.44	0.46	1.09	2.02	2.24	0.5	-0.34	3.34	2.93	0.88	1.07	2.72	3.24	0.25	0.405	0.775	0.785446	0.723296	0.435209	1	0.999631	0.779854
Ccar2_Q8VDP4_S625s_1	2.46	1.83	2.54	1.22	0.59	1.2	1.89	-0.19	-0.01	1.76	0.65	0.35	0.09	0.09	0.13	-0.11	-1.14	-1.325	-1.9625	0.0449911	0.0181428	0.00029725	1	0.999631	0.351308
Ccdc115_Q8VE99_T90t_1	-0.29	1.3	1.59	1.47	0.01	-0.47	-0.06	2.32	0.41	-0.42	0.4	-2.54	2.03	0.88	2.59	0.87	-0.5675	-1.555	0.575	0.414904	0.0557706	0.324	1	0.999631	0.724485
Ccdc120_A2AEV7_S253s_1	1.47	0.41	1.62	0.89	0.88	1.57	2.15	-0.17	1.15	1.3	0.72	0.23	-0.83	-0.78	0.35	-0.67	0.01	-0.2475	-1.58	0.984886	0.52637	0.00315406	1	0.999631	0.351308
Ccdc120_A2AEV7_S283s_1	1.39	0.87	-0.09	0.87	0.2	0.55	0.76	0.83	0.86	2.03	0.81	0.07	3.21	0.49	0.36	0.77	-0.175	0.1825	0.4475	0.630918	0.708603	0.504223	1	0.999631	0.814292
Ccdc132_Q8CI71_S15s_1	-0.5	-0.5	0.54	0.07	-0.66	-0.89	-0.31	-0.01	-0.68	-0.07	0.17	0.41	0.11	-0.66	0.15	0.44	-0.37	0.055	0.1075	0.301929	0.882021	0.777775	1	0.999631	0.921382
Ccdc132_Q8CI71_S494s_1	0.29	-0.77	0.14	-0.13	-1.04	0.65	0.07	-0.38	-1.08	-0.95	-0.6	-1.21	-0.98	-0.34	-0.44	-1.12	-0.0575	-0.8425	-0.6025	0.8916	0.0254024	0.114976	1	0.999631	0.579336
Ccdc132_Q8CI71_S498s_1	-0.39	-1.33	-0.35	-2.27	-2.65	-1.67	-0.98	-3.85	-2.2	0.27	-2.21	-3.23	0.14	-1.8	-2.66	-2.48	-1.2025	-0.7575	-0.615	0.104092	0.337124	0.387439	1	0.999631	0.756827
Ccdc136_D3Z165_T102t_1	0.6	1.5	-0.02	0.34	0.94	0.96	-0.2	0.7	1.09	1.07	0.3	0.57	2.18	1.15	0.43	1.09	-0.005	0.1525	0.6075	0.99049	0.699306	0.219225	1	0.999631	0.669859
Ccdc177_Q3UHB8_S209s_1	0.83	-0.4	-0.43	0.17	-0.23	-0.15	0.28	0.25	-0.18	0.4	-0.76	-0.33	-1.49	-0.65	-0.62	-0.89	-0.005	-0.26	-0.955	0.988678	0.515955	0.0317642	1	0.999631	0.442395
Ccdc177_Q3UHB8_S209s_2	0.15	-0.06	0.31	-0.43	-0.97	-1.79	-0.39	-0.51	-0.82	0.09	-0.44	-1.21	-0.94	-0.95	-0.83	-1.02	-0.9075	-0.5875	-0.9275	0.0332455	0.123214	0.00857766	1	0.999631	0.365244
Ccdc177_Q3UHB8_S211s_1	0.29	-0.3	0.31	-0.32	-0.52	-0.4	-0.48	-0.54	-0.51	0.32	-0.73	-0.79	-0.16	-0.57	-0.85	-0.77	-0.48	-0.4225	-0.5825	0.100881	0.245566	0.0917754	1	0.999631	0.557085
Ccdc177_Q3UHB8_S211s_2	0.26	-0.52	-0.1	-0.32	-0.73	-0.63	-0.46	-0.41	-0.57	0.06	-0.55	-1.19	-0.95	-1.13	-0.83	-1.17	-0.3875	-0.3925	-0.85	0.176975	0.273452	0.015529	1	0.999631	0.388832
Ccdc177_Q3UHB8_S273s_1	-0.41	0	0.44	0.69	0.62	0.28	0.28	0.44	0.5	0.6	0.62	0.22	0.64	0.6	0.31	0.43	0.225	0.305	0.315	0.475161	0.351761	0.350197	1	0.999631	0.737144
Ccdc177_Q3UHB8_S281s_1	-0.06	-0.85	-0.17	-0.82	0.82	0.62	-0.05	-0.8	0.25	0.69	0.01	-1.12	0.42	-0.37	-1.53	-0.5	0.6225	0.4325	-0.02	0.160029	0.333726	0.964554	1	0.999631	0.987331
Ccdc177_Q3UHB8_S303s_1	-0.48	-0.47	-0.92	-0.83	-0.47	-0.56	-0.51	-0.59	-0.76	-0.39	-0.83	-0.75	-0.46	-0.69	-0.81	-0.74	0.1425	-0.0075	4.90654e-17	0.567139	0.977603	1	1	0.999631	1
Ccdc177_Q3UHB8_S310s_1	-1.48	-1.96	-2.91	-4.08	-3.83	-3.12	-2.99	-4.24	-3.24	-2.51	-4.61	-2.86	-3.64	-2.95	-1.97	-3.25	-0.9375	-0.6975	-0.345	0.133835	0.304934	0.576573	1	0.999631	0.846204
Ccdc177_Q3UHB8_S423s_1	0.12	-2.34	-2.64	-1.08	-2.04	-4.03	0.06	-1.64	-3.19	-1.59	-0.57	-1.74	-1.57	-3.32	-1.96	-5.55	-0.4275	-0.2875	-1.615	0.640151	0.697051	0.111314	1	0.999631	0.577068
Ccdc177_Q3UHB8_S90s_1	-0.02	-0.33	0.16	0.03	-0.25	-0.35	-0.55	-0.22	-0.85	-0.4	-0.6	-0.48	-1.07	-0.18	-0.63	-0.24	-0.3025	-0.5425	-0.49	0.243646	0.0627886	0.145221	1	0.999631	0.616182
Ccdc177_Q3UHB8_T208t_1	1.48	-1.03	0.55	0.5	-0.16	0.55	0.12	-0.05	0.52	1.63	-0.24	-0.95	-0.73	-0.01	-0.12	-0.58	-0.26	-0.135	-0.735	0.610396	0.842179	0.178151	1	0.999631	0.642627
Ccdc177_Q3UHB8_T208t_2	0.29	-0.63	-0.26	-0.29	-0.69	-0.43	-0.49	-0.37	-0.52	0.05	-0.6	-1.18	-0.95	-1.16	-0.83	-1.23	-0.2725	-0.34	-0.82	0.345815	0.347283	0.0221543	1	0.999631	0.405544
Ccdc25_Q78PG9_S204s_1	-0.27	-0.63	-0.07	-0.92	-0.17	-1.24	0.2	-0.19	0.28	-0.44	1.01	0.78	0.19	0.46	0.99	0.44	0.1225	0.88	0.9925	0.746156	0.0450608	0.0119975	1	0.999631	0.385092
Ccdc6_D3YZP9_S233s_1	-0.48	0.71	1.03	0.47	-0.17	0.53	-0.52	0.91	0.5	0.66	0.83	0.73	-0.84	0.85	0.69	1.26	-0.245	0.2475	0.0575	0.585313	0.501285	0.913426	1	0.999631	0.972551
Ccdc6_D3YZP9_S237s_1	-0.42	-0.26	-0.87	-0.87	-0.03	-1.04	-1	-0.82	-0.28	-0.21	-0.84	-0.32	0.01	-0.5	-0.11	-0.05	-0.1175	0.1925	0.4425	0.719743	0.517972	0.162612	1	0.999631	0.631442
Ccdc6_D3YZP9_S316s_1	0.36	0.58	0.79	1.44	0.49	0.86	1.66	2.41	0.53	0.93	2.36	0.89	0.57	1.03	1.86	1.17	0.5625	0.385	0.365	0.245339	0.407176	0.356203	1	0.999631	0.74034
Ccdc6_D3YZP9_S345s_1	0.46	0.67	0.49	0.76	0.91	0.5	0.66	0.99	0.42	0.2	0.89	1.18	0.4	0.25	1.11	1.05	0.17	0.0775	0.1075	0.504727	0.799716	0.735649	1	0.999631	0.90759
Ccdc6_D3YZP9_S360s_1	0.1	-0.31	0.09	0.24	0.19	0.11	0.46	-0.01	-0.1	-0.47	-0.63	-0.68	0.02	0.59	-0.11	0.32	0.1575	-0.5	0.175	0.548518	0.0962342	0.564368	1	0.999631	0.84139
Ccdc6_D3YZP9_S45s_1	-0.26	1.51	1.05	0.52	0.83	1.5	0.77	2.19	1.2	0.7	1.02	1.55	1.12	1.55	1.87	1.99	0.6175	0.4125	0.9275	0.217295	0.340657	0.0544192	1	0.999631	0.491994
Ccdc85a_E0CX32_S216s_1	0.04	0.82	2.92	0.51	0.62	0.73	1.79	1.21	1.07	0.73	2.11	1.94	0.16	-0.72	1.23	-0.24	0.015	0.39	-0.965	0.980689	0.5503	0.175917	1	0.999631	0.642116
Ccdc85a_E0CX32_S240s_1	1.4	-0.79	0.19	-0.07	-2.12	-0.25	2.09	-2.2	-2.45	0.32	-1.35	-1.03	-1.63	-1.49	-0.43	-1.36	-0.8025	-1.31	-1.41	0.40962	0.0699165	0.0180714	1	0.999631	0.391024
Ccdc85a_E0CX32_S250s_1	-2.06	-5.37	2.22	1.83	-3.67	-5.8	1.66	0.95	-4.49	-3.34	1.4	1.38	-2.79	-4.41	1.62	1.62	-0.87	-0.4175	-0.145	0.685794	0.834902	0.941344	1	0.999631	0.981286
Ccdc85a_E0CX32_S273s_1	2.6	2.76	2.31	1.62	1.49	2.65	4.05	2	1.89	2.5	2.31	2.39	2.08	1.8	2.63	1.05	0.225	-0.05	-0.4325	0.687514	0.88111	0.321973	1	0.999631	0.724228
Ccdc85a_E0CX32_S284s_1	1.96	-1.7	0.4	1.04	-2.66	-0.9	3.17	-1.72	-2.02	1.84	0.16	-0.88	-1.9	-2.24	0.15	-1.39	-0.9525	-0.65	-1.77	0.462696	0.510733	0.052128	1	0.999631	0.489777
Ccdc85a_E0CX32_S308s_1	0.21	1.43	0.83	-1.12	2.24	0.06	1.34	-0.63	3.4	-0.22	1.47	3.11	4.13	0.66	1.8	0.43	0.415	1.6025	1.4175	0.578593	0.0905769	0.127426	1	0.999631	0.59788
Ccdc88a_Q5SNZ0_S1332s_1	-1.04	0.04	0	-0.71	-0.35	-0.33	-0.58	0.07	0.13	-0.79	-0.28	0.8	0.66	-0.09	0.05	-0.23	0.13	0.3925	0.525	0.700265	0.370965	0.180118	1	0.999631	0.64376
Ccdc88a_Q5SNZ0_S1362s_1	1.43	1.16	-0.47	2	2.07	1.62	1.34	1.65	1.3	0.91	2.2	1.74	-0.23	1.58	1.62	2.14	0.64	0.5075	0.2475	0.231217	0.370262	0.709709	1	0.999631	0.899334
Ccdc88a_Q5SNZ0_S1505s_1	1.8	-0.74	0.47	1.26	0.55	1.16	1.4	0.09	0.85	1.39	0.41	0.71	-0.86	0.36	0.44	-0.09	0.1025	0.1425	-0.735	0.85746	0.794354	0.221404	1	0.999631	0.671697
Ccdc88a_Q5SNZ0_S1594s_1	-0.34	0.1	-0.19	-0.06	-0.22	-0.38	-0.45	-0.51	-0.22	0.12	0.08	0.05	0.58	0.31	-0.47	0.52	-0.2675	0.13	0.3575	0.289148	0.613443	0.295721	1	0.999631	0.708981
Ccdc88a_Q5SNZ0_S1726s_1	1	0.32	-0.84	-0.11	0.55	0.67	0.13	0.34	-0.37	-0.32	0.62	-1.23	-0.01	0.41	-2.63	-0.95	0.33	-0.4175	-0.8875	0.424041	0.421086	0.217936	1	0.999631	0.669859
Ccdc88c_Q6VGS5_S1563s_1	-1.13	-1.05	0.23	-0.92	-1.07	-0.95	-0.43	-0.14	-0.23	-0.55	-0.51	-2.01	-0.54	-0.26	0.69	-0.6	0.07	-0.1075	0.54	0.858899	0.826163	0.237931	1	0.999631	0.683301
Ccdc88c_Q6VGS5_S1675s_1	1.67	-0.71	-1.17	-0.68	-1.24	-0.44	0.04	-1.13	-0.66	1.45	-1.76	-1.44	-2.1	-0.92	-1.24	-1.74	-0.47	-0.38	-1.2775	0.46532	0.653917	0.0642279	1	0.999631	0.514389
Ccdc88c_Q6VGS5_S227s_1	-0.6	0.15	-0.02	0.32	-0.63	-0.24	-0.22	0.66	-0.15	-0.95	0	0.87	0.54	0.39	0.08	-0.84	-0.07	-0.02	0.08	0.846372	0.9624	0.839685	1	0.999631	0.946365
Ccdc92_Q8VDN4_S194s_1	-0.21	1.08	0.17	0.24	0.19	0.69	-0.46	0.3	0.23	0.27	-0.03	0.12	0.71	1.19	0.29	0.47	-0.14	-0.1725	0.345	0.71116	0.605202	0.367529	1	0.999631	0.745968
Ccdc92_Q8VDN4_S261s_1	2.73	0.52	0.57	1.38	0.34	1.53	2.75	-0.34	0.57	2.54	-0.11	-0.85	-2.8	-0.09	-0.09	-0.33	-0.23	-0.7625	-2.1275	0.759486	0.343262	0.0152924	1	0.999631	0.388832
Ccdc97_Q9DBT3_S210s_1	-0.89	-0.59	-0.64	-0.65	-0.51	-0.16	-1.11	0	-0.52	0.46	-0.1	-0.98	0.54	-0.35	1.19	-0.47	0.2475	0.4075	0.92	0.432576	0.263661	0.0473062	1	0.999631	0.480102
Cckbr_P56481_S257s_1	-0.21	-0.72	0.47	-0.2	-0.47	-0.46	-0.19	-0.61	-1.38	0.36	-0.14	-1.4	-1.71	-1.6	-0.66	-0.92	-0.2675	-0.475	-1.0575	0.401366	0.340266	0.0195063	1	0.999631	0.391668
Cckbr_P56481_S443s_1	-0.78	-0.38	-0.29	-0.58	-0.36	-0.62	-0.61	0.44	-0.31	-0.56	-0.17	0.54	-0.38	-0.01	-0.1	-0.15	0.22	0.3825	0.3475	0.497675	0.249351	0.228384	1	0.999631	0.679038
Cckbr_P56481_T433t_1	-0.9	-1.04	-0.96	-0.87	-1.28	-0.74	-1.06	-0.82	-1.71	-0.46	-0.91	-0.71	-0.02	-0.63	-0.36	-0.68	-0.0325	-0.005	0.52	0.89639	0.987798	0.0918206	1	0.999631	0.557085
Ccm2_Q8K2Y9_S164s_1	-0.12	-0.48	-0.25	-2.52	0.67	-0.56	-0.91	-1.49	0.52	0.28	-0.9	-0.96	1.29	0.23	-1.39	-1.56	0.27	0.5775	0.485	0.678222	0.362745	0.534969	1	0.999631	0.828951
Ccm2_Q8K2Y9_S393s_1	0.45	1.25	0.95	0.85	0.97	0.7	0.12	1.1	0.8	0.75	0.79	1.11	0.21	1.35	1.16	1.09	-0.1525	-0.0125	0.0775	0.636252	0.964492	0.827574	1	0.999631	0.941202
Ccm2_Q8K2Y9_S417s_1	1.99	-1.72	-0.44	-0.77	-2.17	-0.83	1.97	-2.62	-2.31	1.78	-1.89	-2.33	-1.61	-1.95	-2.01	-3.71	-0.6775	-0.9525	-2.085	0.546585	0.392547	0.0248173	1	0.999631	0.418003
Ccm2_Q8K2Y9_S425s_1	-0.5	0.62	0.16	-0.34	-0.17	-0.02	0.17	0.62	0.09	0.34	-0.11	0.75	0.56	0.81	0.27	0.25	0.165	0.2825	0.4875	0.630491	0.43052	0.180918	1	0.999631	0.64376
Ccnk_Q3U3M5_S329s_1	1.02	0.85	1.15	0.41	0.47	1.08	0.72	0.48	0.35	1.46	0.65	1	0.2	0.73	0.74	1	-0.17	0.0075	-0.19	0.559334	0.982186	0.553916	1	0.999631	0.837952
Ccnk_Q3U3M5_S341s_1	0.2	0.13	1.71	0.61	0.52	0.12	0.91	1.47	0.62	0.45	1.56	1.76	0.91	0.53	1.94	1.94	0.0925	0.435	0.6675	0.836909	0.369303	0.196714	1	0.999631	0.653373
Ccnl1_Q52KE7_S358s_1	0.48	1.9	1.94	1.81	0.76	1.27	1.03	1.64	1.93	1.12	2.24	2.27	1.5	1.87	2.16	2.54	-0.3575	0.3575	0.485	0.383712	0.422897	0.270609	1	0.999631	0.698674
Ccnl1_Q52KE7_S380s_1	1.23	0.93	1.79	1.24	0.47	1.03	1.07	1.43	1.17	1.81	1.4	1.09	0.79	0.95	1.37	1.3	-0.2975	0.07	-0.195	0.359599	0.821095	0.540002	1	0.999631	0.831295
Ccnl2_Q9JJA7_S366s_1	0.12	1.61	0.98	0.67	0.76	0.56	-0.17	0.4	1.09	0.6	0.49	1.61	1.14	1.71	0.12	0.81	-0.4575	0.1025	0.1	0.248917	0.803032	0.825185	1	0.999631	0.940309
Ccnt2_Q7TQK0_S549s_1	0.96	4.51	2.42	-0.74	4.62	3.57	2.9	0.98	7.13	2.76	3.43	4.38	7.42	2.95	1.13	0	1.23	2.6375	1.0875	0.301524	0.0591334	0.515584	1	0.999631	0.819449
Ccnt2_Q7TQK0_S596s_1	0.69	1.07	0.73	0.48	0.46	0.58	0.14	0.77	1.01	0.68	1.01	0.18	0.82	1.25	0.47	1.59	-0.255	-0.0225	0.29	0.358234	0.940933	0.401787	1	0.999631	0.763221
Ccnt2_Q7TQK0_S657s_1	2.87	0.87	1.58	1.69	0.81	-0.48	1.76	0.09	0.88	1.87	0.99	1.81	0.33	-0.29	0.55	-0.53	-1.2075	-0.365	-1.7375	0.0602385	0.447645	0.00422273	1	0.999631	0.351308
Ccny_Q8BGU5_S25s_1	0.31	-0.4	-1.46	-1.24	-0.36	0.87	-0.22	-0.01	-1.98	-1.7	-0.84	-1.65	-2.66	0.48	-1.32	-2.62	0.7675	-0.845	-0.8325	0.126069	0.0920359	0.277238	1	0.999631	0.700628
Ccny_Q8BGU5_S324s_1	-0.72	-0.4	-0.07	-0.89	-1.06	-1.06	-1.23	-0.4	-1.43	-0.7	-0.21	-0.09	0.2	-0.28	-0.13	0.13	-0.4175	-0.0875	0.5	0.201276	0.816868	0.12885	1	0.999631	0.59942
Ccny_Q8BGU5_S326s_1	-0.72	-0.78	-0.59	-1.01	-0.97	-0.91	-1.35	-0.84	-1.02	-0.61	-0.84	-0.66	0.06	-0.54	-0.76	-0.38	-0.2425	-0.0075	0.37	0.354338	0.976786	0.235767	1	0.999631	0.683301
Ccny_Q8BGU5_S33s_1	-0.41	0.63	0.07	-0.6	0.03	0.03	-0.7	-0.4	0.14	0.31	-0.49	0.09	0.7	-0.05	-0.64	0.23	-0.1825	0.09	0.1375	0.608942	0.802243	0.738316	1	0.999631	0.908027
Ccny_Q8BGU5_S45s_1	0.59	-0.16	1.15	-0.25	-0.35	0.42	-0.62	-0.45	0.2	1.65	-0.35	0.4	0.76	-0.39	0.56	0.18	-0.5825	0.1425	-0.055	0.173134	0.779085	0.897409	1	0.999631	0.966758
Ccny_Q8BGU5_S83s_1	0.63	-0.32	-0.79	1.12	0.91	-0.12	1	0.47	-0.38	-0.73	0.13	0.01	-0.79	-0.25	-0.76	0.36	0.405	-0.4025	-0.52	0.406752	0.394723	0.305526	1	0.999631	0.716537
Ccny_Q8BGU5_S99s_1	-0.63	0.76	0.5	-0.45	-0.08	0.96	-0.24	0.4	0.29	-0.59	-0.22	-0.48	0.87	1.11	0.13	-0.11	0.215	-0.295	0.455	0.618752	0.473286	0.324484	1	0.999631	0.72463
Ccny_Q8BGU5_T37t_1	-0.27	1.77	0.67	-0.08	0.5	1.75	0.44	0.1	0.95	0.93	0.42	0.52	0.37	1.37	0.92	1.14	0.175	0.1825	0.4275	0.746756	0.697125	0.393444	1	0.999631	0.759134
Ccnyl1_E9Q226_S274s_1	-0.57	-0.63	-0.73	-0.73	-0.62	-0.59	-1.53	-0.6	-0.52	-0.14	-0.24	-0.2	0.3	-0.44	-0.52	-0.17	-0.17	0.39	0.4575	0.57283	0.138745	0.147566	1	0.999631	0.620119
Ccnyl1_E9Q226_S276s_1	-0.82	-0.22	-0.26	-0.69	-0.59	-0.76	-1.18	-0.48	-0.49	-0.42	-0.35	-0.03	0.22	-0.27	-0.22	0.21	-0.255	0.175	0.4825	0.386817	0.53577	0.135154	1	0.999631	0.607096
Ccnyl1_E9Q226_S52s_1	-1.12	-0.02	0.05	-0.04	-0.43	-0.15	-0.52	0.38	-0.87	-0.05	-0.49	-0.41	0.05	0.3	-0.59	0.1	0.1025	-0.1725	0.2475	0.779746	0.633595	0.516841	1	0.999631	0.819449
Ccp110_Q7TSH4_S176s_1	1.59	-0.9	0.92	0.12	-1.97	0.14	1.62	-1.57	-1.51	1.43	-0.73	-0.68	-1.55	-1.9	-0.9	-1.1	-0.8775	-0.805	-1.795	0.318751	0.28748	0.00755498	1	0.999631	0.358173
Ccs_Q9WU84_S267s_1	0.98	0.51	-0.26	0.48	1.3	1.87	0.31	1.28	0.06	0.09	-0.57	0.14	0.18	0.86	-0.58	0.61	0.7625	-0.4975	-0.16	0.0890385	0.174078	0.704048	1	0.999631	0.897149
Ccsap_Q8QZT2_S129s_1	0.91	2.33	1.77	0.74	1.58	0.5	0.79	-0.64	1.75	1.33	1.05	0.82	1.44	0.97	-1.49	0.98	-0.88	-0.2	-0.9625	0.130576	0.639687	0.177822	1	0.999631	0.642116
Ccsap_Q8QZT2_S222s_1	0.09	2.22	2.74	-0.15	2.69	0.38	5.54	-0.03	5.06	0.3	3.26	4.89	3.18	-1.32	-0.68	-0.76	0.92	2.1525	-1.12	0.470631	0.0831436	0.31304	1	0.999631	0.719861
Ccser1_Q8C0C4_S375s_1	-0.71	-1.01	-0.98	-0.97	-0.16	-1.05	-1.23	-1.44	-0.75	-0.86	-1.18	-0.87	-0.91	-0.92	-2.23	-1.31	-0.0525	0.0025	-0.425	0.873901	0.992136	0.260222	1	0.999631	0.692624
Ccser2_Q3UHI0_S222s_1	0.02	0.25	-1.94	-0.12	0.14	-0.12	-0.34	-0.73	-0.1	-0.01	-0.62	-0.83	-1.25	0.2	-0.79	0	0.185	0.0575	-0.0125	0.71325	0.910277	0.982228	1	0.999631	0.994846
Cct2_P80314_S3s_1	0.06	1.11	0.6	0.2	0.52	0.4	-0.32	-1.2	0.68	0.15	0.18	0.44	0.96	1.96	0.39	0.85	-0.6425	-0.13	0.5475	0.172594	0.688778	0.211487	1	0.999631	0.665474
Ccz1_Q8C1Y8_S264s_1	-0.3	0.5	0.89	-0.23	4.71	2.11	1.96	0.95	5.83	0.4	2.64	4.23	5.06	1.86	2.52	-0.62	2.2175	3.06	1.99	0.013765	0.0135809	0.0763953	1	0.999631	0.542525
Cd200_Q80VX2_S270s_1	1.59	-2.79	-1.15	-0.54	-1.37	-1.33	0.91	-0.94	-0.79	-0.25	-1.1	-1.03	-2.21	-3.23	-1.09	-1.89	0.04	-0.07	-1.3825	0.964968	0.931208	0.136168	1	0.999631	0.609095
Cd248_Q91V98_S754s_1	0.82	1.41	1.31	0.8	0.97	1.41	0.69	0.29	1.38	2.06	0.91	1.23	1.16	1.76	1.77	1.87	-0.245	0.31	0.555	0.461435	0.369283	0.102846	1	0.999631	0.565572
Cd2ap_Q9JLQ0_S404s_1	0.59	-0.79	-0.75	1.13	-0.02	-0.75	0.49	0.76	0	0.2	0.46	0.38	-1.15	0.13	1.15	0.53	0.075	0.215	0.12	0.88952	0.652855	0.84665	1	0.999631	0.948838
Cd2ap_Q9JLQ0_S510s_1	0.21	-0.17	-0.55	-0.27	0.5	-0.17	-0.3	-0.32	-0.06	0.51	-0.73	-0.34	0.49	-0.36	-0.33	-0.58	0.1225	0.04	-1.96262e-16	0.690926	0.907945	1	1	0.999631	1
Cd2ap_Q9JLQ0_S580s_1	-0.21	2.18	0.67	0.5	1.93	1.47	0.07	0.04	2.09	0.06	0.14	0.16	2	1.74	0.78	0.35	0.0925	-0.1725	0.4325	0.882549	0.786234	0.464974	1	0.999631	0.794369
Cd34_Q64314_S343s_1	-0.66	-0.23	0.09	0.44	-0.33	-0.4	-0.33	-0.11	-1.09	-0.13	-1.74	0.47	-0.22	-0.24	0.21	-0.39	-0.2025	-0.5325	-0.07	0.50899	0.313418	0.835019	1	0.999631	0.944416
Cd44_Q80X37_S544s_1	0.35	1.01	1.54	0.28	0.01	0.85	0.41	1.19	0.35	0.25	1.33	1.1	1.24	1.26	0.74	1.84	-0.18	-0.0375	0.475	0.65308	0.926977	0.250344	1	0.999631	0.686417
Cdc23_Q8BGZ4_S460s_1	-0.58	-0.06	-0.41	0.17	0.29	-0.37	-0.42	-0.04	0.09	-1.14	0.3	-0.58	-0.41	-0.26	-0.21	-0.08	0.085	-0.1125	-0.02	0.776947	0.771931	0.945915	1	0.999631	0.982217
Cdc23_Q8BGZ4_S470s_1	-0.07	0.22	-1.01	-0.68	0.55	0.05	-0.87	-0.65	0.48	0.43	-2.32	-1.32	0.01	0.72	-0.19	-1	0.155	-0.2975	0.27	0.715439	0.656499	0.55225	1	0.999631	0.836594
Cdc23_Q8BGZ4_T478t_1	-1.05	0.16	0.14	-0.58	0.11	-0.51	-0.35	0.29	-0.59	-0.3	0.36	0.25	1.09	0.83	-0.17	0.15	0.2175	0.2625	0.8075	0.558924	0.504741	0.0818454	1	0.999631	0.54792
Cdc27_Q8R568_S371s_1	-0.2	0.2	-0.04	0.48	0.03	-0.59	-0.21	0.4	0.08	0.01	-0.3	0.24	-1.25	-0.1	0.12	0	-0.2025	-0.1025	-0.4175	0.518737	0.716779	0.291705	1	0.999631	0.706164
Cdc42bpa_F6Q5A5_S234s_1	0.33	2.05	1.76	0.79	0.43	1.36	0.8	0.83	1.88	0.41	0.81	1.1	1.21	1.48	1.72	0.62	-0.3775	-0.1825	0.025	0.396349	0.708726	0.956789	1	0.999631	0.984803
Cdc42bpa_F6Q5A5_S945s_1	0.99	0.64	0.14	1.28	0.86	1.37	0.89	1.39	1.57	0.88	1.18	1.27	-0.31	1.41	1.41	1.28	0.365	0.4625	0.185	0.281595	0.186989	0.697751	1	0.999631	0.895731
Cdc42bpa_F6Q5A5_S967s_1	-0.13	-0.79	-0.87	-0.37	0.09	0.11	0.13	0.4	0.3	-0.2	-0.11	-0.22	-0.77	-0.02	-0.21	-0.37	0.7225	0.4825	0.1975	0.0242809	0.126013	0.541211	1	0.999631	0.83207
Cdc42bpb_Q7TT50_S1692s_1	0.58	-0.16	1.02	-0.85	-4.64	0.79	0.11	-0.23	-1.85	-0.62	0.33	1.19	0.54	-4.73	0.16	-1.55	-1.14	-0.385	-1.5425	0.319495	0.579065	0.175162	1	0.999631	0.642116
Cdc42ep1_Q91W92_S121s_1	-0.06	1.54	0.83	0.26	0.87	0.73	-0.07	0.27	1.08	0.28	-0.27	0.94	1.19	1.24	0.96	0.82	-0.1925	-0.135	0.41	0.641708	0.768611	0.310583	1	0.999631	0.71924
Cdc42ep2_Q8JZX9_S137s_1	-0.75	0.48	0.12	0.54	-0.99	-0.74	0.1	1.03	-0.86	-1.28	0.33	1.63	-1.39	-0.85	0.72	0.73	-0.2475	-0.1425	-0.295	0.628815	0.825691	0.607918	1	0.999631	0.858527
Cdc42ep4_Q9JM96_S116s_1	-0.38	0.09	1.47	0.8	0.59	0.11	1	0.84	0.24	-0.16	0.56	0.19	-0.97	0.45	0.52	1.11	0.14	-0.2875	-0.2175	0.749883	0.509284	0.696683	1	0.999631	0.895731
Cdc42ep4_Q9JM96_S140s_1	-0.23	-0.19	-0.66	-1.25	-1.12	-0.25	-1.7	-0.72	-0.54	0.03	-0.9	-1.2	0.12	-0.57	-0.83	-0.91	-0.365	-0.07	0.035	0.370899	0.854821	0.926144	1	0.999631	0.97588
Cdc42ep4_Q9JM96_S64s_1	-0.65	0.6	0.29	-0.11	0.33	0.13	0.01	0.5	0.52	-0.65	0.79	1.23	-0.14	0.36	1.09	0.67	0.21	0.44	0.4625	0.530555	0.358851	0.262888	1	0.999631	0.693034
Cdc5l_Q6A068_T385t_1	-0.26	0.25	0.3	0.67	-0.57	0.04	-0.35	0.46	-0.32	-1.46	-0.79	-0.46	-0.81	-0.16	-0.56	1.88	-0.345	-0.9975	-0.1525	0.316471	0.0175461	0.795339	1	0.999631	0.929228
Cdh10_P70408_T701t_1	0.49	0.13	-0.35	-0.2	-0.11	-0.04	-0.31	-0.27	-0.07	0.21	-0.42	-0.09	-0.25	0.15	-0.52	-0.09	-0.2	-0.11	-0.195	0.480054	0.716182	0.544311	1	0.999631	0.833226
Cdh12_Q5RJH3_S649s_1	0.32	1.23	1.1	0.68	0.44	0.98	0.61	0.29	1.04	0.66	1.13	0.72	0.94	0.86	0.07	0.52	-0.2525	0.055	-0.235	0.423703	0.857999	0.502763	1	0.999631	0.814092
Cdh22_Q9WTP5_S705s_1	0.21	-0.22	-0.16	-0.27	-0.55	-0.52	-0.72	-1.06	-0.82	-0.11	-0.91	-0.15	0.19	-0.35	-1.47	-0.25	-0.6025	-0.3875	-0.36	0.043359	0.227968	0.373859	1	0.999631	0.747035
Cdip1_F6X7Q6_T17t_1	1.52	-0.82	-1.77	0.93	1.65	0.08	1.04	0.77	-0.12	-1.29	-0.05	-0.96	-3.33	0.07	-0.66	-0.73	0.92	-0.57	-1.1275	0.226882	0.441577	0.237042	1	0.999631	0.683301
Cdk10_Q3UMM4_T196t_1	-1.02	0.09	-0.22	-0.02	0.25	0.43	-0.52	-0.55	-0.14	0.11	-0.06	0.33	0.67	0.8	0.27	0.51	0.195	0.3525	0.855	0.604828	0.295114	0.0287278	1	0.999631	0.427571
Cdk11b_P24788_S47s_1	0.5	1.19	1.49	0.92	0.45	1.27	0.47	1.71	1.52	1.16	1.9	1.43	-0.08	1.05	0.89	1.16	-0.05	0.4775	-0.27	0.896838	0.158525	0.489548	1	0.999631	0.807494
Cdk11b_P24788_S578s_1	0.06	0.51	0.76	0.07	0.15	0.1	-0.18	0.21	0.21	0.49	0.37	0.62	0.55	0.45	0.33	0.41	-0.28	0.0725	0.085	0.32538	0.799273	0.772307	1	0.999631	0.919649
Cdk11b_P24788_S65s_1	-0.3	-1.15	-3.48	-1.41	-0.02	-2.53	-2.11	-1.33	-1.07	-0.98	-0.74	-0.1	0.02	-1.54	-1.59	-1.8	0.0875	0.8625	0.3575	0.908781	0.198504	0.613761	1	0.999631	0.860866
Cdk11b_P24788_S72s_1	2.18	1.45	2.01	1.88	0.39	2.29	2.18	-0.14	1.33	2.97	1.12	1.07	0.03	0.23	1.16	-0.55	-0.7	-0.2575	-1.6625	0.245597	0.582301	0.0021539	1	0.999631	0.351308
Cdk12_Q14AX6_S1079s_1	-0.31	1.19	1.96	0.86	0.86	1.52	0.92	0.94	1.28	-0.09	1.52	2.04	1.01	1.21	1.38	1.88	0.135	0.2625	0.445	0.775381	0.661753	0.373395	1	0.999631	0.747035
Cdk13_Q69ZA1_S326s_1	1.44	5.24	6.21	2.5	4.17	4.38	5.06	3.89	4.7	1.26	6.06	5.53	4.51	3.28	4.8	2.52	0.5275	0.54	-0.07	0.596784	0.685568	0.947249	1	0.999631	0.982895
Cdk13_Q69ZA1_T1087t_1	2.16	0.66	2.07	1.35	-0.01	1.04	1.47	0.5	1.18	2.24	0.43	0.85	-0.11	-0.84	0.8	-0.14	-0.81	-0.385	-1.6325	0.101578	0.445151	0.00602523	1	0.999631	0.351545
Cdk13_Q69ZA1_T588t_1	-0.09	-0.18	0.96	0.64	0.41	0.01	0.56	0.85	-0.75	-0.26	1.38	1.02	-0.37	0.43	1.11	0.92	0.125	0.015	0.19	0.725549	0.977774	0.665012	1	0.999631	0.882433
Cdk13_Q69ZA1_T871t_1	-1.02	1.92	1.08	-0.13	0.27	1.32	0.47	0.26	0.91	-0.82	1.8	-0.36	1.26	1.33	0.48	-0.77	0.1175	-0.08	0.1125	0.850863	0.917894	0.875362	1	0.999631	0.960522
Cdk14_D3YV23_S32s_1	-0.81	1.1	0	0.16	1.02	0.77	0.8	-0.3	0.33	-1.19	0.8	-0.45	-0.36	0.19	-1.1	-0.5	0.46	-0.24	-0.555	0.338651	0.661459	0.250158	1	0.999631	0.686417
Cdk16_Q04735_S103s_1	1.39	0.07	-0.94	1.74	1.85	0.34	1.42	1.52	1.1	-0.6	0.6	0.41	-2.93	0.22	-0.06	-0.02	0.7175	-0.1875	-1.2625	0.269052	0.770694	0.155741	1	0.999631	0.626452
Cdk16_Q04735_S43s_1	1.04	1.17	-0.51	0.39	-0.4	1.67	-0.51	0.54	1.7	1.34	-0.01	-0.52	0.25	1.55	0	1.05	-0.1975	0.105	0.19	0.733183	0.860471	0.705931	1	0.999631	0.897883
Cdk16_Q04735_S60s_1	-0.09	0.54	0	-0.03	0.5	0.67	0.12	0.51	0.58	0.23	-0.06	-0.75	0.32	-0.26	-0.04	0.74	0.345	-0.105	0.085	0.227692	0.767365	0.799168	1	0.999631	0.930937
Cdk16_Q04735_S75s_1	0.96	0.82	0.22	0.9	1.4	0.67	0.73	0.99	0.76	0.4	0.21	0.18	-1	0.78	0.25	0.4	0.2225	-0.3375	-0.6175	0.465795	0.271229	0.172946	1	0.999631	0.642116
Cdk16_Q04735_S84s_1	0.52	-0.14	-0.45	0.76	0.7	0.01	0.18	0.87	0.32	-0.64	0.31	0.67	-1.28	0.45	-0.61	0.29	0.2675	-0.0075	-0.46	0.473369	0.985285	0.348798	1	0.999631	0.736697
Cdk17_Q8K0D0_S38s_1	-0.76	-0.49	-0.51	-0.02	0.17	-0.5	0.31	1.31	0.46	-0.26	-0.53	0.21	0.25	0.03	0.34	0.34	0.7675	0.415	0.685	0.0833955	0.223216	0.0372743	1	0.999631	0.457763
Cdk17_Q8K0D0_S53s_1	1.63	-0.13	-0.18	1.4	0.79	0.04	1.75	1.19	-0.64	-0.93	1.45	0.19	-0.54	0.1	-1.23	1.22	0.2625	-0.6625	-0.7925	0.636902	0.320302	0.233902	1	0.999631	0.683077
Cdk17_Q8K0D0_S81s_1	-0.04	0.63	-1.26	-0.46	0.32	-0.6	-0.61	0.14	0.07	0.14	-0.47	-0.06	0.15	0.77	-0.62	-0.27	0.095	0.2025	0.29	0.832595	0.632768	0.550477	1	0.999631	0.836038
Cdk17_Q8K0D0_S96s_1	0.64	0.17	-1.2	1.12	1.07	0.48	0.89	1.01	0.27	-0.92	0.54	-0.04	-1.08	0.8	0.22	-0.07	0.68	-0.22	-0.215	0.185304	0.689665	0.713242	1	0.999631	0.900989
Cdk18_Q04899_S109s_1	0.13	0.09	-0.84	0.16	0.86	0.42	-0.04	0.23	0.47	0.13	-0.05	0.41	-1.66	0.61	0.43	0.32	0.4825	0.355	0.04	0.179722	0.291468	0.941441	1	0.999631	0.981286
Cdk18_Q04899_S66s_1	-0.05	-0.46	-0.28	1.41	1.21	0.92	0.55	1.33	0.44	0.2	1.11	0.71	-0.89	0.38	1.04	0.78	0.8475	0.46	0.1725	0.0822775	0.327807	0.758348	1	0.999631	0.914449
Cdk5r1_P61809_T138t_1	1.34	0.19	-0.71	1.26	1.59	1.4	1.26	1.54	0.64	-0.04	1.17	-0.17	-2.68	1.11	0.59	0.89	0.9275	-0.12	-0.5425	0.0724486	0.823693	0.54046	1	0.999631	0.831391
Cdkl5_Q3UTQ8_S306s_1	-0.39	-1	-0.86	-0.79	0.44	-0.82	0.23	-0.62	0.26	-1.34	-0.22	0.3	-0.72	-1.32	-0.08	-0.64	0.5675	0.51	0.07	0.139205	0.233693	0.839682	1	0.999631	0.946365
Cdkl5_Q3UTQ8_S377s_1	1.3	-0.71	0.46	1.76	1.14	-0.4	1.41	2.05	-0.25	-1.58	0.23	0.3	-0.55	-0.65	0.94	1.63	0.3475	-1.0275	-0.36	0.605498	0.126961	0.606171	1	0.999631	0.85817
Cdkl5_Q3UTQ8_S407s_1	-1.02	0.91	-0.16	0.53	2.07	1.04	0.64	1.22	0.71	-0.74	1.08	0.87	-0.85	0.54	0.76	0.9	1.1775	0.415	0.2725	0.0353523	0.456728	0.619443	1	0.999631	0.861888
Cdkl5_Q3UTQ8_S497s_1	1.15	1.02	2.24	2.3	0.86	1.18	2.3	2.65	1.33	0.81	2.77	2.29	-1.09	1.02	2.42	2.06	0.07	0.1225	-0.575	0.891481	0.816134	0.453093	1	0.999631	0.788717
Cdkl5_Q3UTQ8_S681s_1	0.61	2.47	2.14	1.77	1.02	2.34	2.56	2.44	1.88	1.4	2.13	1.92	0.44	1.78	0.58	2.04	0.3425	0.085	-0.5375	0.503846	0.844059	0.330806	1	0.999631	0.727302
Cdkl5_Q3UTQ8_S691s_1	0.28	-0.12	0	-0.26	0.51	0.36	-0.08	0.14	-0.1	0.44	-0.28	-0.22	-0.7	-0.03	-1.31	-0.57	0.2575	-0.015	-0.6275	0.347981	0.958473	0.0944152	1	0.999631	0.558128
Cdkl5_Q3UTQ8_S761s_1	0.29	1.07	-0.46	0.85	0.78	1.08	-0.25	0.59	0.6	0.85	-0.07	0.51	0.49	1.54	0.74	0.17	0.1125	0.035	0.2975	0.79599	0.930844	0.512245	1	0.999631	0.818025
Cdkl5_Q3UTQ8_Y171y_1	-0.41	-4.19	-4.73	-1.22	-1.71	-1.39	-1.8	-0.78	-1.71	-1.33	-3.18	-2.38	-2.06	-2.08	-2.77	-2.22	1.2175	0.4875	0.355	0.217558	0.624357	0.703944	1	0.999631	0.897149
Cdkn1b_P46414_S10s_1	-0.7	0.88	0.64	-0.25	0.89	-0.14	0.95	0.05	1.4	-0.26	1.03	1.65	0.63	-0.15	-0.05	0	0.295	0.8125	-0.035	0.517047	0.147536	0.934041	1	0.999631	0.978764
Cdkn1b_P46414_S178s_1	-0.53	1.04	0.28	1.04	0	-0.04	-0.15	0.29	0.98	-0.46	0.45	1.98	1.16	0.6	2.53	1.1	-0.4325	0.28	0.89	0.287114	0.631269	0.114872	1	0.999631	0.579336
Cdkn2aip_Q8BI72_S169s_1	3.03	1.31	1.99	1.81	0.64	1.47	2.74	0.3	1.28	2.1	0.81	0.82	-0.11	0.1	1.11	0.05	-0.7475	-0.7825	-1.7475	0.225184	0.113482	0.00308736	1	0.999631	0.351308
Cds1_P98191_S56s_1	-0.75	0.34	-0.23	-0.51	-0.14	-0.25	-0.63	-0.26	-0.51	0.08	-0.59	-0.67	0.56	0.15	-0.58	-0.67	-0.0325	-0.135	0.1525	0.916922	0.690142	0.704664	1	0.999631	0.897611
Cds2_Q6PBC0_S20s_1	0.34	-0.35	1.32	1.51	-0.58	-0.44	0.97	0.58	-0.26	0.64	0.48	0.49	-1.39	-1.21	0.28	-0.73	-0.5725	-0.3675	-1.4675	0.29825	0.437361	0.0199092	1	0.999631	0.391668
Cds2_Q6PBC0_S32s_1	1.11	-0.31	0.51	0.56	-0.81	-0.26	0.44	-0.05	-0.47	0.97	-0.48	-0.61	-0.69	-0.92	-0.4	-1.33	-0.6375	-0.615	-1.3025	0.132223	0.203528	0.00659792	1	0.999631	0.351545
Cds2_Q6PBC0_S32s_2	1.13	0.56	0.51	0.35	0.44	1.21	0.36	-0.08	1.41	1.76	-0.47	0.03	-0.28	-0.87	-0.5	-0.54	-0.155	0.045	-1.185	0.657551	0.931805	0.00300678	1	0.999631	0.351308
Cds2_Q6PBC0_S36s_2	1.13	0.56	1.03	0.8	0.44	1.21	0.88	0.35	1.41	1.76	-0.46	0.95	-0.28	-0.87	-0.08	-0.32	-0.16	0.035	-1.2675	0.596591	0.942154	0.00201355	1	0.999631	0.351308
Cdv3_Q4VAA2_S51s_1	0.2	0	0.88	-0.48	1.38	0.57	2.05	0.58	1.94	-0.3	1.02	1.53	-0.04	-0.86	0.82	-1.73	0.995	0.8975	-0.6025	0.0455585	0.113409	0.302819	1	0.999631	0.714978
Cdv3_Q4VAA2_S58s_1	1.28	-1.85	-0.26	0.8	0.5	-0.13	1.1	0.28	-1.1	-0.01	-0.43	-0.43	-1.26	-1.83	-0.61	-1	0.445	-0.485	-1.1675	0.504567	0.465517	0.101876	1	0.999631	0.564448
Cecr6_Q99MX7_S521s_1	-0.42	0.12	-0.08	-0.38	-0.42	-0.05	-0.43	-0.05	-0.33	0.13	0.32	-0.33	0.66	0.1	0.03	0.73	-0.0475	0.1375	0.57	0.858064	0.640049	0.093207	1	0.999631	0.558128
Cecr6_Q99MX7_S527s_1	-1.13	-0.43	-0.31	-1.33	-0.36	-0.79	-0.79	-1.21	-0.81	-0.49	-0.96	-0.71	0.25	-0.62	-0.55	-0.62	0.0125	0.0575	0.415	0.970743	0.860125	0.279746	1	0.999631	0.701922
Cecr6_Q99MX7_S548s_1	-1.93	-0.81	-1.22	-1.57	-0.84	-1.47	-1.19	-1.23	-0.91	-1.6	-1.13	-1.46	-0.2	-1.42	-1.2	-0.99	0.2	0.1075	0.43	0.536555	0.748842	0.283836	1	0.999631	0.704942
Celf4_Q7TSY6_S164s_1	1.99	0.58	1.46	1.66	-0.9	0.83	1.62	0.07	0.57	2.49	1.42	1.22	1.4	0.3	0.7	-0.47	-1.0175	0.0025	-0.94	0.0958452	0.995839	0.0736874	1	0.999631	0.539601
Celsr2_F7BHW1_S637s_1	-0.14	-0.75	0.05	0.46	0.15	-0.56	-0.35	0	-0.97	-0.4	0.34	0.73	-0.34	-0.53	0.48	0.4	-0.095	0.02	0.0975	0.778004	0.964319	0.802521	1	0.999631	0.932677
Celsr2_F7BHW1_S808s_1	0.87	-0.23	-0.92	-0.33	0.62	-0.22	0.23	0.47	-0.65	-0.1	-0.64	-0.15	0.46	-0.79	-0.06	0.37	0.4275	-0.2325	0.1475	0.315751	0.574036	0.750516	1	0.999631	0.912627
Cend1_Q9JKC6_S109s_1	1.89	0.02	2.02	1.54	-0.11	0.9	1.12	0.58	0.57	2.55	0.07	0.43	-0.83	-1.07	0.15	-0.97	-0.745	-0.4625	-2.0475	0.159163	0.483157	0.00248216	1	0.999631	0.351308
Cend1_Q9JKC6_S10s_1	1.69	-0.22	0.65	0.39	-3.05	-0.49	1.24	-0.62	-0.88	-0.5	-0.75	-0.98	-2.13	-0.95	-0.24	-0.78	-1.3575	-1.405	-1.6525	0.131176	0.00701413	0.0102972	1	0.999631	0.383871
Cend1_Q9JKC6_S90s_1	-0.14	-0.94	-0.13	-0.37	-0.31	0.06	-0.89	-0.86	-0.4	0.1	-1.61	-0.53	0.15	0.78	-0.27	-0.45	-0.105	-0.215	0.4475	0.754861	0.605415	0.248001	1	0.999631	0.685751
Cenpa_D6RJ71_S15s_1	0.46	-1.18	-0.26	-0.58	-0.82	-0.41	-0.23	-0.69	-0.31	0.7	-0.7	-0.7	-1.42	-1.07	-0.5	-1.59	-0.1475	0.1375	-0.755	0.69898	0.766333	0.101667	1	0.999631	0.564448
Cenpv_Q9CXS4_S18s_1	0.71	-0.31	0.77	0.78	-0.65	-0.14	0.43	0.36	-0.68	-0.9	0.21	-0.71	-0.93	-0.8	0.76	-0.33	-0.4875	-1.0075	-0.8125	0.218786	0.0242985	0.102538	1	0.999631	0.565479
Cenpv_Q9CXS4_S6s_1	2.67	1.49	1.21	2.35	1.41	1.7	2.45	2.35	1.01	0.65	1.31	-0.66	-1.4	0.96	0.56	0.24	0.0475	-1.3525	-1.84	0.910465	0.0255196	0.0088901	1	0.999631	0.365244
Cep128_F7CIB0_S536s_1	2.64	0.65	0.76	2.34	1.09	1.62	2.76	0.48	0.64	1.12	0.67	1.27	-1.6	0	1.49	0.19	-0.11	-0.6725	-1.5775	0.862629	0.209471	0.0507185	1	0.999631	0.489558
Cep131_B1AXI9_S47s_1	1.04	1.29	0.32	0.7	0.32	1.85	1.03	1.22	0.19	0.05	1.66	-1.31	-1.8	1.74	-0.42	0.42	0.2675	-0.69	-0.8525	0.496377	0.257711	0.23273	1	0.999631	0.682707
Cep131_B1AXI9_S78s_1	0.59	0.6	-0.62	-0.06	0.39	0.54	0.36	0.22	0.55	0.21	-0.25	0.45	-0.67	0.84	-1.68	-0.69	0.25	0.1125	-0.6775	0.464983	0.761768	0.239505	1	0.999631	0.683719
Cep170_H7BX26_S1048s_1	0.57	0.59	-0.37	0.63	0.55	0.82	0.18	-0.06	1.2	1.3	-0.52	0.1	0.5	1.25	-0.44	0.25	0.0175	0.165	0.035	0.959358	0.732694	0.935377	1	0.999631	0.979217
Cep170_H7BX26_S1155s_1	1.57	0.62	0.27	1.76	1.43	0.83	2.33	1.21	1.43	0.52	1.83	0.35	-1.72	0.24	0.5	0.93	0.395	-0.0225	-1.0675	0.401454	0.963002	0.111062	1	0.999631	0.577068
Cep170_H7BX26_S1157s_1	1.61	1.48	1.28	1.75	1.15	-0.45	2.8	-0.93	1.53	1.13	1.35	1.16	-1.74	-0.5	-1.35	1.19	-0.8875	-0.2375	-2.13	0.253031	0.373305	0.00505085	1	0.999631	0.351308
Cep170_H7BX26_S1215s_1	2.03	-1.33	0.06	0.81	-0.03	-1.62	1.87	-0.23	-0.98	0.26	-0.24	0.47	-2.88	-1.38	-0.56	0.88	-0.395	-0.515	-1.3775	0.651927	0.462095	0.15221	1	0.999631	0.625198
Cep170_H7BX26_S1260s_1	0.77	0.71	-1.06	-0.26	0.85	-0.34	0.32	0.4	0.29	0.16	0.06	0.43	-0.62	0.27	-0.49	-0.02	0.2675	0.195	-0.255	0.576734	0.658427	0.591657	1	0.999631	0.852627
Cep170_H7BX26_S1296s_1	0.97	0.35	-1.17	0.92	2.49	1.31	1.14	2.07	0.68	0.21	1.1	-0.28	-2.58	0.58	0.9	-0.8	1.485	0.16	-0.7425	0.0204246	0.767706	0.372638	1	0.999631	0.747035
Cep170_H7BX26_S1511s_1	-0.26	0.04	-1.16	-0.83	-0.38	-0.85	-0.59	-1.5	-0.6	0.15	-1.09	-0.66	-0.19	0.47	-0.38	-0.62	-0.2775	0.0025	0.3725	0.469781	0.994891	0.349646	1	0.999631	0.736894
Cep170_H7BX26_S1512s_1	-0.26	0.04	-1.16	-0.83	-0.38	-0.85	-0.59	-1.5	-0.6	0.15	-1.09	-0.66	-0.19	0.47	-0.38	-0.62	-0.2775	0.0025	0.3725	0.469781	0.994891	0.349646	1	0.999631	0.736894
Cep170_H7BX26_S1512s_2	-0.49	1.13	-0.77	-2.39	-0.98	0.02	-0.86	-0.35	0.07	-0.55	-0.79	-0.79	0.22	0.97	-0.49	-1.62	0.0875	0.115	0.4	0.896517	0.86381	0.615578	1	0.999631	0.861203
Cep170_H7BX26_S1519s_1	-0.64	-1.26	0.24	0.66	-1.34	-1.07	0.06	-0.14	-1.44	-0.46	0.7	1.24	-1.4	-0.25	0.23	0.69	-0.3725	0.26	0.0675	0.474688	0.695841	0.906281	1	0.999631	0.969391
Cep170_H7BX26_S1519s_2	-0.49	1.13	-0.77	-2.39	-0.98	0.02	-0.86	-0.35	0.07	-0.55	-0.79	-0.79	0.22	0.97	-0.49	-1.62	0.0875	0.115	0.4	0.896517	0.86381	0.615578	1	0.999631	0.861203
Cep170_H7BX26_S378s_1	1.69	-2.56	-3.72	-4.08	-1.54	-1.99	-1.14	-6.2	-0.64	0.92	-4.09	-2.94	-0.41	-0.99	-5.92	-7.57	-0.55	0.48	-1.555	0.714923	0.746186	0.410349	1	0.999631	0.767937
[truncated: 8,232 more rows]

## Sheet: TMT all phosphosites SYP
phosphosite SYP		normalized protein expression SYP																LogFC over WT SYP			p-value / WT SYP			adjusted p-value / WT SYP
id	name	SYP_WT	SYP_WT	SYP_WT	SYP_WT	SYP_MNK1KO	SYP_MNK1KO	SYP_MNK1KO	SYP_MNK1KO	SYP_MNK2KO	SYP_MNK2KO	SYP_MNK2KO	SYP_MNK2KO	SYP_MNKDKO	SYP_MNKDKO	SYP_MNKDKO	SYP_MNKDKO	logFC.SYP_MNK1KO.over.SYP_WT	logFC.SYP_MNK2KO.over.SYP_WT	logFC.SYP_MNKDKO.over.SYP_WT	P.Value.SYP_MNK1KO.over.SYP_WT	P.Value.SYP_MNK2KO.over.SYP_WT	P.Value.SYP_MNKDKO.over.SYP_WT	adj.P.Val.SYP_MNK1KO.over.SYP_WT	adj.P.Val.SYP_MNK2KO.over.SYP_WT	adj.P.Val.SYP_MNKDKO.over.SYP_WT
0610010F05Rik_M0QWF3_S116s_1	0610010F05Rik_M0QWF3_S116s_1	-0.36	-0.42	0.61	-0.52	-0.39	0.61	0.27	-0.26	-0.36	-1.38	-0.24	-0.33	0.94	-0.46	-0.08	0.38	0.23	-0.405	0.3675	0.51879	0.302157	0.37472	0.989223	0.997988	0.994666
0610011F06Rik_G5E8X1_S149s_1	0610011F06Rik_G5E8X1_S149s_1	-0.2	0.12	0.12	-0.12	0.34	-0.28	0.29	0.11	0.01	0.14	-0.23	0.06	-0.21	0.41	0.23	0.35	0.135	0.015	0.215	0.567598	0.946235	0.418981	0.989223	0.997988	0.994666
1110002E22Rik_E0CYV9_S1338s_1	1110002E22Rik_E0CYV9_S1338s_1	-0.6	-0.14	0.08	-0.23	0.41	-1.03	-1.01	-0.26	0.11	-0.55	0.16	-0.42	1.52	0.31	-0.15	-0.36	-0.25	0.0475	0.5525	0.501965	0.865743	0.22515	0.989223	0.997988	0.994666
1110037F02Rik_E9PZY8_S1628s_1	1110037F02Rik_E9PZY8_S1628s_1	0.44	-0.85	-0.2	-0.52	-0.03	-0.81	0.37	-0.08	0.03	-0.44	-1.29	-1	-0.05	0.64	0.6	-0.27	0.145	-0.3925	0.5125	0.692307	0.339645	0.193965	0.994893	0.997988	0.994666
1700021K19Rik_D3Z7B1_S137s_1	1700021K19Rik_D3Z7B1_S137s_1	0.07	-0.27	1.03	0.18	0.05	-0.32	0.7	0.43	-0.2	-0.11	1.12	0.84	-0.15	-0.14	0.63	0.6	-0.0375	0.16	-0.0175	0.915812	0.706236	0.962425	0.997335	0.997988	0.999507
1700112E06Rik_E0CYG4_T63t_1	1700112E06Rik_E0CYG4_T63t_1	0.46	0.85	1.1	0.93	0.57	0.23	0.99	0.65	0.54	0.49	0.46	0.61	0.57	0.3	0.53	0.6	-0.225	-0.31	-0.335	0.392141	0.204695	0.211967	0.989223	0.997988	0.994666
2010300C02Rik_E9Q3M9_S1094s_1	2010300C02Rik_E9Q3M9_S1094s_1	-2.15	-2.53	-2.42	-4.07	-2.16	-2.8	-1.75	-2.62	-3.8	-2.01	-0.4	-2.35	-1.96	-1.1	-2.79	-2.66	0.46	0.6525	0.665	0.329761	0.386904	0.237705	0.989223	0.997988	0.994666
2010300C02Rik_E9Q3M9_S1123s_1	2010300C02Rik_E9Q3M9_S1123s_1	-1.8	-0.6	-0.61	0.5	-1.73	-3.63	0.4	0.1	-3.27	-0.82	0.53	-0.08	-2.16	-1.47	-0.35	-0.79	-0.5875	-0.2825	-0.565	0.521566	0.740536	0.331598	0.989223	0.997988	0.994666
2010300C02Rik_E9Q3M9_S113s_1	2010300C02Rik_E9Q3M9_S113s_1	-0.74	-1.25	-1.64	-2.53	-1.21	-0.64	-1.35	-1.89	-1.93	-0.94	0.32	-1.92	-3.18	-0.45	-2.12	-1.91	0.2675	0.4225	-0.375	0.539031	0.486229	0.546405	0.989223	0.997988	0.994666
2010300C02Rik_E9Q3M9_S162s_1	2010300C02Rik_E9Q3M9_S162s_1	-1.71	-0.88	-0.9	-0.54	-0.79	-1.95	-0.23	-0.52	-1.37	-1.13	-1.14	-0.71	-1	-0.55	-0.81	-0.43	0.135	-0.08	0.31	0.752226	0.799868	0.350965	0.995762	0.997988	0.994666
2010300C02Rik_E9Q3M9_S189s_1	2010300C02Rik_E9Q3M9_S189s_1	-1.58	-1.51	-0.67	-0.34	-1.27	-1.41	-0.26	-0.56	-0.8	-1.43	-0.75	-0.75	-0.37	-0.61	-0.65	-0.84	0.15	0.0925	0.4075	0.707589	0.798054	0.26386	0.995437	0.997988	0.994666
2010300C02Rik_E9Q3M9_S325s_1	2010300C02Rik_E9Q3M9_S325s_1	2.81	0.94	1.1	1.1	0.64	3.41	1.87	-0.06	1.43	2.72	0.04	0.94	0.77	1.02	0.83	1.43	-0.0225	-0.205	-0.475	0.976694	0.752047	0.3092	0.999187	0.997988	0.994666
2010300C02Rik_E9Q3M9_S465s_1	2010300C02Rik_E9Q3M9_S465s_1	2.06	1.44	4.3	5.02	0.09	3.15	3.66	4.83	1.56	1.78	4.45	4.19	1.23	-0.53	3.83	4.02	-0.2725	-0.21	-1.0675	0.811806	0.836678	0.384995	0.995762	0.997988	0.994666
2010300C02Rik_E9Q3M9_S47s_1	2010300C02Rik_E9Q3M9_S47s_1	-0.42	-0.09	-0.19	0.17	0.49	0.17	1.58	0.15	-0.39	0.01	-0.03	0.21	-0.39	0.34	-0.29	0.23	0.73	0.0825	0.105	0.065372	0.741813	0.717781	0.989223	0.997988	0.996966
2010300C02Rik_E9Q3M9_S507s_1	2010300C02Rik_E9Q3M9_S507s_1	2.93	2.77	2.63	2.24	2.42	2.5	2.2	2.51	0.71	2.89	1.32	2.55	0.24	0.44	2.59	2.64	-0.235	-0.775	-1.165	0.329874	0.147667	0.0828788	0.989223	0.997988	0.994666
2010300C02Rik_E9Q3M9_S570s_1	2010300C02Rik_E9Q3M9_S570s_1	2.7	2.67	2.89	2.68	2.46	2.31	2.29	2.69	1.14	2.77	2.17	2.45	0.69	0.98	2.8	2.59	-0.2975	-0.6025	-0.97	0.178047	0.125715	0.0834675	0.989223	0.997988	0.994666
2010300C02Rik_E9Q3M9_S572s_1	2010300C02Rik_E9Q3M9_S572s_1	2.44	2.31	2.74	2.15	1.99	2.11	1.46	2.3	1.21	2.38	1.59	2.54	0.71	0.81	2.96	2.54	-0.445	-0.48	-0.655	0.118136	0.198206	0.252315	0.989223	0.997988	0.994666
2010300C02Rik_E9Q3M9_S612s_1	2010300C02Rik_E9Q3M9_S612s_1	4.02	3.65	2.91	1.61	3.21	3.64	0.81	0.18	1.27	3.85	1.28	2.87	0.47	0.75	-1.57	2.69	-1.0875	-0.73	-2.4625	0.235238	0.338981	0.0199407	0.989223	0.997988	0.994666
2010300C02Rik_E9Q3M9_S712s_1	2010300C02Rik_E9Q3M9_S712s_1	0.29	0.1	-0.78	-0.79	0.44	0.04	-0.27	-0.75	0.27	0.26	-0.33	-0.49	-0.45	0.74	-0.64	-0.68	0.16	0.2225	0.0375	0.669797	0.539861	0.931138	0.992876	0.997988	0.999507
2010300C02Rik_E9Q3M9_S730s_1	2010300C02Rik_E9Q3M9_S730s_1	-1.91	-0.07	0.61	0.56	0.24	-1.45	1.01	0.18	-1.72	-0.33	0.9	0.16	-0.75	-1.21	0.91	1.19	0.1975	-0.045	0.2375	0.775724	0.950551	0.750475	0.995762	0.997988	0.9971
2010300C02Rik_E9Q3M9_S898s_1	2010300C02Rik_E9Q3M9_S898s_1	-2.44	-2.68	-2.82	-5.35	-1.42	-2.28	-2.73	-3.02	-3.96	-2.8	-0.3	-2.61	-1.97	-0.77	-3.32	-2.64	0.96	0.905	1.1475	0.178357	0.332715	0.160603	0.989223	0.997988	0.994666
2010300C02Rik_E9Q3M9_S918s_1	2010300C02Rik_E9Q3M9_S918s_1	0.33	-1.17	-0.83	-0.54	-0.44	0.65	-0.48	-0.37	-0.54	-0.62	0.84	-0.65	-0.1	0.31	-0.36	-0.32	0.3925	0.31	0.435	0.342781	0.507966	0.261948	0.989223	0.997988	0.994666
2010300C02Rik_E9Q3M9_S92s_1	2010300C02Rik_E9Q3M9_S92s_1	-0.92	-0.71	-0.81	-0.7	-0.15	-0.42	-0.19	-0.44	-0.99	-0.71	-1.56	-1.11	-0.9	-0.25	-1.08	-0.87	0.485	-0.3075	0.01	0.0375413	0.246487	0.970774	0.989223	0.997988	0.999507
2010300C02Rik_E9Q3M9_S95s_1	2010300C02Rik_E9Q3M9_S95s_1	0.09	-0.37	-0.15	0.21	0.46	0.1	0.7	0.72	-0.53	-0.25	-0.04	0.03	-1.06	0.27	-0.47	0.01	0.55	-0.1425	-0.2575	0.0502437	0.576001	0.468067	0.989223	0.997988	0.994666
2010300C02Rik_E9Q3M9_S961s_1	2010300C02Rik_E9Q3M9_S961s_1	0.02	0.22	0.31	0.24	0.28	0.03	0.29	0.05	0.02	-0.02	0.12	0.24	0.26	0.56	0.02	-0.09	-0.035	-0.1075	-0.01	0.864685	0.615481	0.96914	0.996493	0.997988	0.999507
2010300C02Rik_E9Q3M9_T660t_1	2010300C02Rik_E9Q3M9_T660t_1	0	0.54	0.55	0.72	0.2	-0.27	0.86	0.77	0	0.4	0.54	0.51	-0.14	0.43	0.48	0.62	-0.0625	-0.09	-0.105	0.845717	0.733245	0.722307	0.996349	0.997988	0.9971
2010300C02Rik_E9Q3M9_T959t_1	2010300C02Rik_E9Q3M9_T959t_1	-0.62	0.15	0.37	0.58	-0.53	-0.83	0.85	0.7	-0.27	0.15	0.43	0.4	0.64	0.5	0.33	0.24	-0.0725	0.0575	0.3075	0.875793	0.86226	0.352109	0.996493	0.997988	0.994666
2010300C02Rik_F7B0R9_S599s_1	2010300C02Rik_F7B0R9_S599s_1	-1.98	-1.69	-2.46	-3.4	-1.98	-2.19	-1.41	-1.76	-2.14	-1.77	0.72	-1.61	-1.62	-1.46	-2.15	-2.66	0.5475	1.1825	0.41	0.188382	0.107666	0.373654	0.989223	0.997988	0.994666
2310035C23Rik_G3X9J4_S141s_1	2310035C23Rik_G3X9J4_S141s_1	0.21	0.35	0.05	0.83	0.09	0.2	0.69	0.38	0.32	0.29	0.59	0.76	-0.1	0.16	0.65	0.89	-0.02	0.13	0.04	0.938965	0.625623	0.902102	0.999187	0.997988	0.999507
2310035C23Rik_G3X9J4_S180s_1	2310035C23Rik_G3X9J4_S180s_1	0.37	0.67	-0.2	0.15	0.5	0.27	0.16	0.37	0.27	0.2	-0.58	0.05	-0.18	0.81	-1.27	-0.15	0.0775	-0.2625	-0.445	0.759014	0.397856	0.336	0.995762	0.997988	0.994666
2310035C23Rik_G3X9J4_S182s_1	2310035C23Rik_G3X9J4_S182s_1	-0.3	-0.32	-0.12	-0.36	0.32	-0.06	0.03	-0.04	-0.69	-0.31	-0.24	-0.38	-0.84	0.35	-1.03	-0.45	0.3375	-0.13	-0.2175	0.130037	0.561507	0.531123	0.989223	0.997988	0.994666
2310035C23Rik_G3X9J4_S193s_1	2310035C23Rik_G3X9J4_S193s_1	-1	-1.04	-0.43	-2.45	-2.26	-0.01	-1.84	-1.16	1.15	-1.2	-0.76	-0.55	0.47	-3.08	-0.44	-1.16	-0.0875	0.89	0.1775	0.881114	0.170517	0.81752	0.996493	0.997988	0.999507
2310035C23Rik_G3X9J4_S243s_1	2310035C23Rik_G3X9J4_S243s_1	-0.01	0.37	-0.19	-0.48	0.49	-0.32	-0.01	-0.41	-0.34	0.23	-0.66	-0.4	-0.02	0.31	-0.6	-0.39	0.015	-0.215	-0.0975	0.959608	0.477962	0.759243	0.999187	0.997988	0.9971
2310035C23Rik_G3X9J4_S244s_1	2310035C23Rik_G3X9J4_S244s_1	-0.01	0.37	-0.43	-0.62	0.49	-0.32	-0.19	-0.61	-0.34	0.23	-0.84	-0.43	-0.02	0.31	-0.7	-0.45	0.015	-0.1725	-0.0425	0.963833	0.608605	0.902396	0.999187	0.997988	0.999507
2310035C23Rik_G3X9J4_S422s_1	2310035C23Rik_G3X9J4_S422s_1	1.46	0.24	1.51	1.98	-0.65	2.31	0.17	1.76	1.5	1.13	0.95	2.44	0.39	-1.88	1.1	1.13	-0.4	0.2075	-1.1125	0.565157	0.663042	0.144022	0.989223	0.997988	0.994666
2310035C23Rik_G3X9J4_S56s_1	2310035C23Rik_G3X9J4_S56s_1	0.42	0.84	0.04	0.42	0.54	0.38	0.83	0.55	0.44	0.47	0	0.01	-0.3	0.31	0.4	0.35	0.145	-0.2	-0.24	0.561187	0.463252	0.425952	0.989223	0.997988	0.994666
2310035C23Rik_G3X9J4_T143t_1	2310035C23Rik_G3X9J4_T143t_1	0.1	0.23	0.32	0.17	0.24	0.18	0.6	0.74	0.05	0.32	-0.2	0.44	-0.22	0.72	0.25	0.49	0.235	-0.0525	0.105	0.310821	0.825391	0.7109	0.989223	0.997988	0.996966
4833439L19Rik_D3Z1F7_S164s_1	4833439L19Rik_D3Z1F7_S164s_1	-0.63	0.6	0.67	0.92	0.01	-1.04	-0.69	0.73	0.1	-0.42	1.85	0.57	1.13	0.67	0.76	0.45	-0.6375	0.135	0.3625	0.207514	0.807198	0.360144	0.989223	0.997988	0.994666
4931406P16Rik_Q8C5X1_S662s_1	4931406P16Rik_Q8C5X1_S662s_1	-1.09	-1.29	-0.88	-0.87	-0.53	-1.16	-0.83	-0.76	-0.64	-1.1	-0.26	-0.2	0.2	-0.27	-0.42	-0.44	0.2125	0.4825	0.8	0.37575	0.11228	0.0136831	0.989223	0.997988	0.994666
5031439G07Rik_B1APX2_S30s_1	5031439G07Rik_B1APX2_S30s_1	-0.17	0.03	-0.35	0.42	0.2	-0.56	-0.41	0.39	0.72	0.07	1.46	0.42	0.35	0.1	-1.03	-0.31	-0.0775	0.685	-0.205	0.79985	0.0781299	0.578236	0.995762	0.997988	0.995259
5031439G07Rik_B1APX2_S311s_2	5031439G07Rik_B1APX2_S311s_2	-0.95	-0.49	-0.8	-0.18	0.12	-0.36	-0.6	-0.82	-0.28	0.24	-1.52	-0.41	-0.37	-0.96	-0.09	-0.2	0.19	0.1125	0.2	0.521115	0.780961	0.525373	0.989223	0.997988	0.994666
5031439G07Rik_B1APX2_S322s_1	5031439G07Rik_B1APX2_S322s_1	0.18	0.62	0.1	-0.52	0.46	-0.17	1.56	-0.36	0.59	0.31	1.22	1.79	0.7	1.29	0.93	0.6	0.2775	0.8825	0.785	0.54879	0.0517866	0.0347475	0.989223	0.997988	0.994666
5031439G07Rik_B1APX2_S322s_2	5031439G07Rik_B1APX2_S322s_2	-0.2	-0.38	0	0.43	0.22	-0.28	0.05	-0.19	0.13	0.65	-0.66	-0.3	-0.02	-0.59	0.53	0.51	-0.0125	-0.0075	0.145	0.961374	0.982793	0.678232	0.999187	0.997988	0.996159
5031439G07Rik_B1APX2_S347s_1	5031439G07Rik_B1APX2_S347s_1	-1.66	-1.55	-2.71	-2.38	-0.42	-1.41	-2.38	-2.65	-1.03	-1.49	-1.31	-3.33	-1.27	-0.45	-2.25	-2.21	0.36	0.285	0.53	0.499743	0.606431	0.292958	0.989223	0.997988	0.994666
5031439G07Rik_B1APX2_S405s_1	5031439G07Rik_B1APX2_S405s_1	0.15	0.11	-0.05	-0.03	0.76	-0.61	0.25	-0.16	-0.6	-0.54	-1.02	0.13	-1.59	0.22	0.03	-0.24	0.015	-0.5525	-0.44	0.961849	0.0817197	0.302062	0.999187	0.997988	0.994666
5031439G07Rik_B1APX2_T336t_1	5031439G07Rik_B1APX2_T336t_1	0.53	0.19	0.53	0.68	0.24	0.26	0.32	0.72	0.32	0.4	0.35	0.73	0.19	0.33	0.4	0.39	-0.0975	-0.0325	-0.155	0.672188	0.889172	0.526849	0.992876	0.997988	0.994666
5730455P16Rik_J3KMQ6_S19s_1	5730455P16Rik_J3KMQ6_S19s_1	-2.13	-0.95	-0.92	-1.65	-2.44	-1.56	-1.8	-1.98	-0.73	-1.4	0.1	-1.09	-0.69	-0.94	-1.04	-1.58	-0.5325	0.6325	0.35	0.151486	0.162026	0.353689	0.989223	0.997988	0.994666
6330403A02Rik_J3QP43_S27s_1	6330403A02Rik_J3QP43_S27s_1	0.13	0.34	0.46	0.53	0.66	0.37	0.96	0.68	-0.08	-0.05	-0.31	0.53	0.34	0.8	0.6	0.32	0.3025	-0.3425	0.15	0.204373	0.213896	0.557419	0.989223	0.997988	0.995259
6330403A02Rik_J3QP43_S28s_1	6330403A02Rik_J3QP43_S28s_1	0.89	1.03	0.49	0.75	0.64	0.56	0.71	0.48	0.22	0.66	0.22	0.38	0.74	1.02	0.39	0.02	-0.1925	-0.42	-0.2475	0.385172	0.106358	0.423705	0.989223	0.997988	0.994666
6330403A02Rik_J3QP43_S29s_1	6330403A02Rik_J3QP43_S29s_1	0.74	0.89	0.95	1.33	0.85	0.89	1.04	0.32	0.24	0.32	-1.09	0.67	0.86	0.69	1.31	-0.03	-0.2025	-0.9425	-0.27	0.433955	0.0406557	0.435661	0.989223	0.997988	0.994666
6430548M08Rik_Q3TA40_S208s_1	6430548M08Rik_Q3TA40_S208s_1	1.1	0.14	1.22	1.46	1.17	1.93	1.64	1.73	0.63	0.96	2.29	2.3	-0.35	1.56	0.69	1.69	0.6375	0.565	-0.0825	0.0849432	0.271602	0.873626	0.989223	0.997988	0.999507
6430548M08Rik_Q3TA40_S275s_1	6430548M08Rik_Q3TA40_S275s_1	1.1	1.1	1.02	1.05	0.76	0.73	0.58	0.85	0.61	1.16	1.07	0.85	0.07	1.16	0.83	0.85	-0.3375	-0.145	-0.34	0.110227	0.526667	0.268606	0.989223	0.997988	0.994666
6430548M08Rik_Q3TA40_S72s_1	6430548M08Rik_Q3TA40_S72s_1	-1.06	-0.58	-0.75	-0.2	-0.62	-0.94	-0.25	-0.51	-1.27	-0.6	0.86	-0.5	-1.07	-0.05	-1.21	-0.29	0.0675	0.27	-0.0075	0.803377	0.561381	0.983424	0.995762	0.997988	1
8030462N17Rik_Q0VAW6_S145s_1	8030462N17Rik_Q0VAW6_S145s_1	-0.51	-0.91	-0.41	-0.38	-0.92	-0.51	-0.94	-0.72	0.75	-0.22	0.29	-0.86	0.3	-0.85	-0.66	-0.85	-0.22	0.5425	0.0375	0.354515	0.170222	0.911573	0.989223	0.997988	0.999507
8030462N17Rik_Q0VAW6_S66s_1	8030462N17Rik_Q0VAW6_S66s_1	-0.64	-0.66	0.03	-0.22	-1.12	-1.2	-0.44	0.24	-1.25	-0.86	0.46	0.14	-0.62	-0.33	0.17	-0.47	-0.2575	-0.005	0.06	0.492633	0.990651	0.84196	0.989223	0.997988	0.999507
A0A0G2JDV2_S170s_1	A0A0G2JDV2_S170s_1	-0.21	0.07	-0.4	0.17	-0.36	-0.02	-0.85	0.54	0.64	0.12	-1.53	-0.24	1.25	0.42	0.31	-0.51	-0.08	-0.16	0.46	0.808709	0.728712	0.258715	0.995762	0.997988	0.994666
A0A0G2JFH6_S27s_1	A0A0G2JFH6_S27s_1	-2.48	1.08	1.88	0.91	1.03	-2.31	3.18	1.85	1.3	0.63	0.4	1.88	1.99	2.14	2.84	3.03	0.59	0.705	2.1525	0.65206	0.444526	0.0327831	0.990358	0.997988	0.994666
A0A0G2JFH6_S28s_1	A0A0G2JFH6_S28s_1	-1.19	0.39	1.74	1.67	-0.13	-0.23	0.19	0.03	1.7	-0.83	2.8	1.56	1.63	0.99	0.52	-0.41	-0.6875	0.655	0.03	0.282657	0.478833	0.966869	0.989223	0.997988	0.999507
A0A0G2JGJ4_S77s_1	A0A0G2JGJ4_S77s_1	0.14	0.75	-0.01	-1.62	0.24	0.66	-0.18	-1.51	1.11	0.6	-1.99	-1.15	1.46	-0.02	-0.53	-0.44	-0.0125	-0.1725	0.3025	0.983784	0.827673	0.628444	0.999187	0.997988	0.995259
A0A0J9YUM2_S765s_1	A0A0J9YUM2_S765s_1	0.71	0.1	0.39	0.73	0.28	1.54	-0.08	1.19	0.77	-0.41	1.09	0.2	-0.3	0.3	-0.35	-0.14	0.25	-0.07	-0.605	0.52994	0.850037	0.0565693	0.989223	0.997988	0.994666
A0A0J9YUM2_S766s_1	A0A0J9YUM2_S766s_1	0.64	0.24	0.49	0.94	0.52	1.38	-0.05	1.67	0.68	0.22	1.2	0.51	-0.83	0.4	-0.09	0.11	0.3025	0.075	-0.68	0.460494	0.799414	0.0681689	0.989223	0.997988	0.994666
A0A0J9YVH8_S1262s_1	A0A0J9YVH8_S1262s_1	0.22	1.37	1.52	0.56	0.29	0.33	0.65	1.06	-0.03	0.73	2.03	0.76	1.03	1.02	-0.41	0.7	-0.335	-0.045	-0.3325	0.362767	0.928087	0.467019	0.989223	0.997988	0.994666
A0A0N4SUT6_T239t_1	A0A0N4SUT6_T239t_1	-0.81	0.69	-0.07	0.53	-0.07	0.74	-0.01	-1.07	0.33	-0.82	1.25	0.31	0.86	1.08	0.29	-0.69	-0.1875	0.1825	0.3	0.689231	0.721092	0.5479	0.994672	0.997988	0.994666
A0A0N4SW73_S1188s_1	A0A0N4SW73_S1188s_1	-5.27	-4.25	-3.91	-3.85	-4.03	-4.59	-3.39	-3.89	-4.2	-3.99	-2.22	-3.93	-2.5	-2.87	-3.46	-4.05	0.345	0.735	1.1	0.393806	0.185862	0.035852	0.989223	0.997988	0.994666
A0A0N4SW93_S866s_1	A0A0N4SW93_S866s_1	0.2	-0.76	-0.49	-0.39	-0.04	0.62	0.22	0.3	-0.98	-1.38	-0.09	-0.36	-1.79	0.23	-0.63	-0.58	0.635	-0.3425	-0.3325	0.0446135	0.360558	0.466437	0.989223	0.997988	0.994666
A0A0R4J006_S143s_1	A0A0R4J006_S143s_1	1.1	1	0.42	0.81	1.46	-0.18	0.76	0.59	0.34	0.83	-0.23	0.71	0.63	0.33	0.4	0.98	-0.175	-0.42	-0.2475	0.633558	0.202495	0.393503	0.989223	0.997988	0.994666
A0A0R4J0J1_S543s_1	A0A0R4J0J1_S543s_1	1.24	0.33	0.32	0.79	0.59	1	0.96	0.65	0.77	0.94	0.09	0.8	0.08	0.62	0.67	0.74	0.13	-0.02	-0.1425	0.643547	0.950066	0.653897	0.990258	0.997988	0.995259
A0A0R4J0K0_T176t_1	A0A0R4J0K0_T176t_1	0.11	-0.14	-0.36	0.38	-0.36	0.39	0.62	0.16	-0.7	0.49	0.57	0.32	-0.14	0.43	-0.07	-0.13	0.205	0.1725	0.025	0.488865	0.624775	0.9299	0.989223	0.997988	0.999507
A0A0R4J0M1_S162s_1	A0A0R4J0M1_S162s_1	0.59	0.01	0.46	0.71	0.68	0.53	0.97	0.88	-0.32	0.4	-0.02	0.31	-0.67	0.65	0.05	0.38	0.3225	-0.35	-0.34	0.207158	0.227761	0.346729	0.989223	0.997988	0.994666
A0A0R4J1E3_S613s_1	A0A0R4J1E3_S613s_1	0.49	0.39	0.29	0.45	0.33	0.17	0.59	0.27	-0.13	0.39	-0.26	0.47	-0.78	0.72	0	0.26	-0.065	-0.2875	-0.355	0.754188	0.279914	0.321434	0.995762	0.997988	0.994666
A0A0R4J216_S30s_1	A0A0R4J216_S30s_1	0.06	0.6	0.86	0.72	0.57	0.76	-0.49	0.67	1.44	0.48	0.98	1.26	1.03	0.26	0.41	0.52	-0.1825	0.48	-0.005	0.598901	0.144208	0.986772	0.989223	0.997988	1
A0A0R4J216_T23t_1	A0A0R4J216_T23t_1	0.92	0.59	0.54	0.2	-0.22	0.5	0.59	0.79	1.02	0.04	1.35	-1.59	1.04	0.66	0.42	0.83	-0.1475	-0.3575	0.175	0.617183	0.566041	0.533001	0.989223	0.997988	0.994666
A0A0U1RPY2_S57s_1	A0A0U1RPY2_S57s_1	-2.01	-1.54	-1.95	-4.68	-2.07	-1.84	-2.13	-2.08	2.37	-1.51	-2.05	-0.82	3.05	-1.72	2.56	-1.8	0.515	2.0425	3.0675	0.430151	0.0841797	0.0380948	0.989223	0.997988	0.994666
A0A140LHX7_S67s_1	A0A140LHX7_S67s_1	-0.53	0.28	0.18	0.2	0.19	-0.52	0.41	-0.17	-0.41	-0.15	0.12	0.33	-0.42	0.34	-0.02	-0.09	-0.055	-0.06	-0.08	0.855419	0.837297	0.792326	0.996349	0.997988	0.999507
A0A140LHX7_S68s_1	A0A140LHX7_S68s_1	-0.12	0.73	0.24	-0.29	0.32	-0.15	0.15	-0.39	0.38	0.31	-0.14	-0.08	0.58	0.96	-0.39	-0.15	-0.1575	-0.0225	0.11	0.601992	0.940319	0.78096	0.989223	0.997988	0.998226
A0A140LI67_S906s_1	A0A140LI67_S906s_1	-0.01	-0.13	-0.96	-0.3	-2.84	-0.94	-3.13	-2.5	1.99	-0.7	0.26	-1.46	1.68	-0.24	0.23	-0.33	-2.0025	0.3725	0.685	0.00236284	0.596366	0.181597	0.989223	0.997988	0.994666
A0A140LIW3_S1289s_1	A0A140LIW3_S1289s_1	-0.41	-1.42	0.59	0.05	-0.21	-0.43	-0.26	0.55	2.05	0.18	0.21	0.61	2.94	-1.14	-0.51	0.2	0.21	1.06	0.67	0.640875	0.0872947	0.449908	0.989223	0.997988	0.994666
A0A140LIW3_S1290s_1	A0A140LIW3_S1290s_1	-0.41	-1.42	0.26	-0.05	-0.21	-0.43	-0.6	0.4	2.05	0.18	-0.55	0.58	2.94	-1.14	-1.08	-0.33	0.195	0.97	0.5025	0.633853	0.133279	0.581114	0.989223	0.997988	0.995259
A0A140LIW3_S1350s_1	A0A140LIW3_S1350s_1	1.41	-0.38	-0.68	0.26	1.04	1.36	0.54	0.69	0.12	1.38	0.55	0.28	1.09	2.1	-0.12	0.29	0.755	0.43	0.6875	0.127803	0.40671	0.278289	0.989223	0.997988	0.994666
A0A140LIW3_S1450s_1	A0A140LIW3_S1450s_1	0.28	0.48	0.57	0.75	0.8	0.22	0.85	0.74	0.24	0.57	0.45	0.71	0.3	0.57	0.53	0.75	0.1325	-0.0275	0.0175	0.584727	0.905941	0.94405	0.989223	0.997988	0.999507
A0A140LJD2_S105s_1	A0A140LJD2_S105s_1	0.38	0.69	0.03	-0.03	0.63	0.25	0.46	0.13	0.16	0.44	0.32	0.28	0.27	0.68	-0.01	0.08	0.1	0.0325	-0.0125	0.695107	0.896934	0.965991	0.994893	0.997988	0.999507
A0A1B0GQW2_S50s_1	A0A1B0GQW2_S50s_1	-0.62	-0.29	-0.16	-0.28	-0.56	-0.47	-0.71	-0.47	-0.27	-0.31	-0.81	-0.22	1.28	0.27	-0.4	-0.91	-0.215	-0.065	0.3975	0.324734	0.792527	0.402629	0.989223	0.997988	0.994666
A0A1B0GR85_S1132s_1	A0A1B0GR85_S1132s_1	0.78	0.41	1.24	0.82	1.11	0.62	0.35	0.91	0.46	0.72	1.11	1.2	0.5	0.88	0.32	0.81	-0.065	0.06	-0.185	0.813964	0.835213	0.523602	0.995762	0.997988	0.994666
A0A1B0GR85_S1194s_1	A0A1B0GR85_S1194s_1	-1.09	0.54	-0.78	0.02	0.16	-0.03	0.08	-0.35	0.49	0.18	-0.44	-0.16	0.59	0.41	-0.19	-0.47	0.2925	0.345	0.4125	0.448162	0.415835	0.359	0.989223	0.997988	0.994666
A0A1B0GR85_S1194s_2	A0A1B0GR85_S1194s_2	0.5	-1.41	-0.35	0.2	-1.58	0.49	-0.04	-0.51	-0.2	0.2	-0.24	0.16	-0.14	-0.33	-0.84	-0.73	-0.145	0.245	-0.245	0.792242	0.568313	0.582295	0.995762	0.997988	0.995259
A0A1B0GR85_S1202s_2	A0A1B0GR85_S1202s_2	0.5	-1.41	-0.35	0.2	-1.58	0.49	-0.04	-0.51	-0.2	0.2	-0.24	0.16	-0.14	-0.33	-0.84	-0.73	-0.145	0.245	-0.245	0.792242	0.568313	0.582295	0.995762	0.997988	0.995259
A0A1B0GR85_S1331s_1	A0A1B0GR85_S1331s_1	0.43	0.58	0.84	0.33	0.63	0.05	0.66	0.33	0.58	0.52	0.84	0.5	0.6	0.84	0.11	0.61	-0.1275	0.065	-0.005	0.603165	0.779003	0.98542	0.989223	0.997988	1
A0A1B0GR85_S1454s_1	A0A1B0GR85_S1454s_1	-0.79	-0.49	-0.29	-0.12	-0.34	-0.91	-1.08	-0.68	-0.85	-0.58	-0.75	-0.31	-0.14	-0.31	-0.38	-0.15	-0.33	-0.2	0.1775	0.22832	0.442267	0.497285	0.989223	0.997988	0.994666
A0A1B0GS09_S77s_1	A0A1B0GS09_S77s_1	-0.08	0.03	0.03	0.36	0.29	-0.1	0.15	0.01	-0.45	0.53	0.49	0.16	-0.12	0.69	-0.08	-0.1	0.0025	0.0975	0.0125	0.990834	0.737902	0.965511	0.999187	0.997988	0.999507
A0A1D5RLB2_S38s_1	A0A1D5RLB2_S38s_1	0.66	0.65	0.53	0.52	-0.67	0.89	-0.16	0.35	0.95	0.35	0.27	-0.09	0.57	-0.58	0.6	-0.07	-0.4875	-0.22	-0.46	0.177251	0.430981	0.182712	0.989223	0.997988	0.994666
A0A1D5RLL0_S106s_1	A0A1D5RLL0_S106s_1	1.22	1.06	0.33	0.21	0.17	0.62	0.3	0.48	0.55	0.94	0.62	0.33	0.64	0.34	0.31	0.72	-0.3125	-0.095	-0.2025	0.309423	0.763639	0.532948	0.989223	0.997988	0.994666
A0A1W2P772_S197s_1	A0A1W2P772_S197s_1	0.57	0.22	0.83	0.33	0.21	0.08	0.69	0.7	-0.16	0.29	-0.39	0.72	0.13	0.22	0.56	0.7	-0.0675	-0.3725	-0.085	0.795184	0.2531	0.757661	0.995762	0.997988	0.9971
A0A1W2P772_S207s_1	A0A1W2P772_S207s_1	-0.9	-0.97	-0.06	-0.26	0.1	-0.21	-0.14	0.44	-0.8	-1.2	-0.02	-0.18	-0.34	-0.25	-0.88	-0.35	0.595	-0.0025	0.0925	0.0697054	0.994543	0.771462	0.989223	0.997988	0.9971
A0A1W2P772_S210s_1	A0A1W2P772_S210s_1	-0.15	-0.1	-1.34	-0.11	-0.39	-0.27	-0.43	-0.53	0.33	-0.66	0.32	-1.46	-0.48	-1.51	-0.78	-0.5	0.02	0.0575	-0.3925	0.950613	0.908051	0.335227	0.999187	0.997988	0.994666
A0A1W2P832_S760s_1	A0A1W2P832_S760s_1	-0.62	-0.95	-0.87	-1.05	-0.72	-0.83	-0.06	-0.43	-1.1	-0.27	-0.26	-0.9	-1.55	-0.37	-0.66	-0.46	0.3625	0.24	0.1125	0.171707	0.407304	0.73215	0.989223	0.997988	0.9971
A0A1W2P832_S776s_1	A0A1W2P832_S776s_1	-3.09	-4.04	-3.44	-4.16	-2.87	-5.32	-4.89	-3.24	-5.06	-2.69	-1.57	-4.48	-3.51	-2.6	-4.08	-2.19	-0.3975	0.2325	0.5875	0.502929	0.758777	0.236637	0.989223	0.997988	0.994666
A0A1Y7VKX4_S609s_1	A0A1Y7VKX4_S609s_1	0.48	-0.23	-0.55	-0.67	-0.05	0.53	-1.12	-1.43	0.79	-0.04	-0.29	-0.37	1.11	-0.14	-0.74	-0.26	-0.275	0.265	0.235	0.573122	0.486852	0.609317	0.989223	0.997988	0.995259
A0A1Y7VLQ2_S103s_2	A0A1Y7VLQ2_S103s_2	1.3	0.67	0.59	-1.16	0.17	-0.03	-0.38	-1.38	-0.15	0.66	-0.29	-1.55	-0.01	1.42	-0.68	0.4	-0.755	-0.6825	-0.0675	0.204282	0.298368	0.913717	0.989223	0.997988	0.999507
A0A1Y7VLQ2_S95s_2	A0A1Y7VLQ2_S95s_2	1.3	0.67	0.59	-1.16	0.17	-0.03	-0.38	-1.38	-0.15	0.66	-0.29	-1.55	-0.01	1.42	-0.68	0.4	-0.755	-0.6825	-0.0675	0.204282	0.298368	0.913717	0.989223	0.997988	0.999507
A0A1Y7VNP1_S418s_2	A0A1Y7VNP1_S418s_2	-0.57	-0.4	-1.48	-2.73	-0.66	-1.08	-1.13	-1.34	-0.77	-0.31	-0.92	-0.82	-0.76	-0.08	-1.53	-1.44	0.2425	0.59	0.3425	0.633303	0.270119	0.558343	0.989223	0.997988	0.995259
A0A1Y7VNP1_S421s_2	A0A1Y7VNP1_S421s_2	-1.08	-1.37	-1.48	-2.73	-1.11	-1.54	-1.13	-1.34	-1.21	-1.23	-0.92	-0.82	-1.4	-0.55	-1.53	-1.44	0.385	0.62	0.435	0.315203	0.131012	0.32143	0.989223	0.997988	0.994666
A0A1Y7VNZ6_S556s_1	A0A1Y7VNZ6_S556s_1	-2.46	-0.83	-2.17	-1.39	-0.12	-1.9	-2.07	-1.56	-0.47	-0.68	-0.99	-1.48	0.84	-0.21	-0.4	-2.04	0.3	0.8075	1.26	0.571553	0.0816588	0.0719726	0.989223	0.997988	0.994666
A0A286YCB8_S126s_1	A0A286YCB8_S126s_1	-0.56	-0.39	-0.54	0.18	0.26	-0.42	-0.11	-0.31	0.07	-0.98	-0.22	-0.2	-0.59	0.05	-0.18	0.17	0.1825	-0.005	0.19	0.505364	0.987355	0.532701	0.989223	0.997988	0.994666
A0A286YCB8_S127s_1	A0A286YCB8_S127s_1	1.38	3.37	0.32	-0.5	2.48	2.02	-0.16	-0.88	2.55	2.57	-0.3	-0.23	2.29	3.62	-0.37	-0.03	-0.2775	0.005	0.235	0.784044	0.996122	0.8307	0.995762	0.998367	0.999507
A0A286YCB8_S131s_1	A0A286YCB8_S131s_1	0.66	1.48	0.42	-0.1	1.07	0.61	0.98	0.72	0.52	0.86	0.29	-0.13	0.24	1.2	-0.21	0.4	0.23	-0.23	-0.2075	0.514616	0.559105	0.634824	0.989223	0.997988	0.995259
A0A286YCX6_S971s_1	A0A286YCX6_S971s_1	-0.12	0	0.58	-0.12	0.06	0.07	0.48	0.03	0.3	0.8	0.24	-0.34	0.16	0	0.23	0.01	0.075	0.165	0.015	0.767309	0.605824	0.955275	0.995762	0.997988	0.999507
A0A286YCX6_T968t_1	A0A286YCX6_T968t_1	-0.14	0.69	0.6	0.41	0.29	-0.9	0.47	1.31	-0.19	-0.44	-2.09	0.73	-0.22	0.94	0.26	1.39	-0.0975	-0.8875	0.2025	0.831474	0.143882	0.620358	0.995762	0.997988	0.995259
A0A286YD83_S49s_1	A0A286YD83_S49s_1	1.36	1.34	2.03	1.04	1.41	0.98	1.71	1.94	0.62	1.37	1.15	2.07	0.7	1.31	1.38	0.69	0.0675	-0.14	-0.4225	0.829127	0.708166	0.214402	0.995762	0.997988	0.994666
A0A286YDE4_S719s_1	A0A286YDE4_S719s_1	-0.28	-0.9	-0.65	-1.54	-0.63	0.87	-1.12	-0.74	0.08	-1.45	-2.09	-0.59	-0.32	-1.04	-1.15	-1.15	0.4375	-0.17	-0.0725	0.366632	0.740091	0.8395	0.989223	0.997988	0.999507
A0A286YDL2_S718s_1	A0A286YDL2_S718s_1	0.62	0.48	-0.06	0.76	0.54	0.54	-0.17	0.49	0.44	-0.09	-0.44	0.8	-0.77	0.82	0.16	0.29	-0.1	-0.2725	-0.325	0.725011	0.438729	0.411001	0.995437	0.997988	0.994666
A0A286YDL2_S741s_1	A0A286YDL2_S741s_1	-0.28	-0.06	0.14	0.2	0.74	0.71	0.39	1.08	-0.77	-0.82	1.49	0.35	-0.13	0.84	-0.33	0.24	0.73	0.0625	0.155	0.0127345	0.904511	0.634257	0.989223	0.997988	0.995259
A0A286YDL2_S741s_2	A0A286YDL2_S741s_2	0	-0.71	0.25	0.23	-0.1	0.75	0.29	0.45	-0.36	-1.2	0.97	0.36	-1.57	-0.18	-1.21	-0.5	0.405	1.57009e-16	-0.8075	0.208034	1	0.0664402	0.989223	1	0.994666
A0A286YDL2_S745s_1	A0A286YDL2_S745s_1	0.38	0.39	0.61	0.7	0.8	0.69	0.25	0.36	0.45	-0.22	0.81	0.87	-0.5	0.77	-0.01	0	0.005	-0.0425	-0.455	0.982601	0.887852	0.17895	0.999187	0.997988	0.994666
A0A286YDL2_S745s_2	A0A286YDL2_S745s_2	0	-0.71	0.52	1.05	-0.1	0.75	0.52	0.86	-0.36	-1.2	1.06	0.84	-1.57	-0.18	0.12	0.17	0.2925	-0.13	-0.58	0.484153	0.827267	0.281189	0.989223	0.997988	0.994666
A0A286YDL2_S750s_1	A0A286YDL2_S750s_1	1.9	0.1	1.02	2.37	0.73	0.86	1.43	2.28	1.48	1.94	1.55	1.21	0.35	0.45	1.76	1.71	-0.0225	0.1975	-0.28	0.967532	0.690327	0.631552	0.999187	0.997988	0.995259
A0A2C9F2C1_S114s_1	A0A2C9F2C1_S114s_1	-0.34	-0.1	0.16	0.12	0.3	0.01	0.25	-0.15	-0.52	-0.28	0.06	0.08	-1.28	0.3	-1.2	0.11	0.1425	-0.125	-0.4775	0.540927	0.626203	0.282511	0.989223	0.997988	0.994666
A0A2I3BPI6_T9t_1	A0A2I3BPI6_T9t_1	0.42	-0.53	0.41	0.11	-1.57	-0.28	-0.09	0.23	0.48	-0.25	-0.68	0.08	1.01	-1.11	0.14	0.19	-0.53	-0.195	-0.045	0.235295	0.578789	0.923868	0.989223	0.997988	0.999507
A0A2I3BQ39_S187s_1	A0A2I3BQ39_S187s_1	-0.75	-1.11	-1.79	-1.93	-0.18	-0.95	-1.21	-2.22	-1.2	-1.26	0.79	-1.25	-1.55	-0.57	-1.94	-0.43	0.255	0.665	0.2725	0.589228	0.236511	0.54925	0.989223	0.997988	0.994666
A0A2I3BQP6_S426s_1	A0A2I3BQP6_S426s_1	0.08	0.17	-0.42	-0.26	0.13	0.13	-0.09	-0.2	0.03	0.27	0.15	-0.26	0.22	0.42	-0.43	-0.16	0.1	0.155	0.12	0.669974	0.543415	0.688747	0.992876	0.997988	0.996159
A0A2I3BRN2_S374s_1	A0A2I3BRN2_S374s_1	-0.54	-1.12	-1.19	-1.09	-1.15	0.01	-0.16	-0.84	2.48	-0.72	-3.61	-0.56	3.09	-1.61	2.23	-0.59	0.45	0.3825	1.765	0.189008	0.729158	0.0983538	0.989223	0.997988	0.994666
A0A2R8VHB6_S125s_1	A0A2R8VHB6_S125s_1	-1.42	-0.8	-0.2	-0.41	-0.31	-1	-0.26	-0.38	-1.25	-1.7	0.21	-0.29	-0.84	-0.29	-0.32	-0.62	0.22	-0.05	0.19	0.509282	0.917822	0.574876	0.989223	0.997988	0.995259
A0A2R8VHB6_S130s_1	A0A2R8VHB6_S130s_1	-1.24	0.24	-1.27	-1.61	0.42	1.71	-1.38	-1.24	1.85	0.84	-0.8	-1.27	0.38	-0.54	-1.87	-1.01	0.8475	1.125	0.21	0.268969	0.156903	0.715308	0.989223	0.997988	0.996966
A0A2R8VHB6_S148s_1	A0A2R8VHB6_S148s_1	-1.84	-2.27	-1.27	-2.17	-2.45	-1.12	-1.17	-1.15	1.55	-2.15	-1.51	-0.79	1.48	-2.32	0.95	-1.66	0.415	1.1625	1.5	0.296764	0.147341	0.103476	0.989223	0.997988	0.994666
A0A2R8VHB6_S148s_2	A0A2R8VHB6_S148s_2	0.17	1.26	0.81	0.5	-0.68	0.39	0.36	0.35	0.72	0.22	0.61	0.9	-1.26	0.25	0.43	0.77	-0.58	-0.0725	-0.6375	0.124057	0.814071	0.207174	0.989223	0.997988	0.994666
A0A2R8W6P0_S335s_1	A0A2R8W6P0_S335s_1	0.64	0.78	0.91	0.77	0.59	0.87	1.18	0.88	0.19	0.47	0.5	0.95	0.01	0.94	0.72	0.91	0.105	-0.2475	-0.13	0.635025	0.327488	0.657604	0.989223	0.997988	0.995259
A0A3B2WBC6_S10s_1	A0A3B2WBC6_S10s_1	-0.55	-0.25	0.49	0.41	-0.48	-0.7	0.37	0.11	-0.23	0.18	0.07	-0.07	-0.46	-0.16	0.08	0.28	-0.2	-0.0375	-0.09	0.576917	0.902149	0.789457	0.989223	0.997988	0.999507
A0A3B2WCD2_S1010s_1	A0A3B2WCD2_S1010s_1	0.34	-0.54	-0.64	-0.29	0.46	0.32	-0.22	-0.35	1.54	-0.25	-3.19	-0.56	1.8	0.29	-0.52	-0.46	0.335	-0.3325	0.56	0.301114	0.708736	0.315438	0.989223	0.997988	0.994666
A0A3B2WCD2_S1019s_1	A0A3B2WCD2_S1019s_1	0.34	0.24	0.3	0.09	1.09	-0.02	0.15	-0.04	-0.38	0.06	0.1	0.02	-0.22	0.49	0.27	-0.03	0.0525	-0.2925	-0.115	0.860632	0.217057	0.66342	0.996493	0.997988	0.996159
A0A3B2WCD2_S1217s_1	A0A3B2WCD2_S1217s_1	-0.62	-0.82	-0.24	-0.82	-1.23	-0.01	-1.01	-1.03	2.42	-0.65	-1.68	-0.08	3.25	-1.22	1.29	-0.39	-0.195	0.6275	1.3575	0.547442	0.434165	0.145388	0.989223	0.997988	0.994666
A0A3B2WCD2_S1301s_1	A0A3B2WCD2_S1301s_1	1.96	1.45	1.92	0.65	1.15	2.01	0.23	1.08	0.86	1.26	0.9	1.75	1.29	0.86	0.48	2.19	-0.3775	-0.3025	-0.29	0.404882	0.427437	0.533842	0.989223	0.997988	0.994666
A0A3B2WCD2_S1379s_1	A0A3B2WCD2_S1379s_1	0.06	0.06	-0.83	-0.13	-0.15	0.67	0.2	0.33	-0.31	-0.05	0.01	-0.06	-0.68	0.3	-0.84	0.26	0.4725	0.1075	-0.03	0.136461	0.698748	0.937463	0.989223	0.997988	0.999507
A0A3B2WCD2_S877s_1	A0A3B2WCD2_S877s_1	1.41	2	2.21	1.44	1.92	2.05	1.88	1.86	0.71	1.87	0.56	1.8	0.44	0.64	1.84	2	0.1625	-0.53	-0.535	0.53143	0.206574	0.242918	0.989223	0.997988	0.994666
A0A3B2WCD2_S898s_1	A0A3B2WCD2_S898s_1	-0.21	0.77	0.94	0.74	0.52	-0.16	1.46	1.21	0.58	0.3	1.27	0.65	0.29	1.02	1.07	1.59	0.1975	0.14	0.4325	0.643414	0.688326	0.278481	0.990258	0.997988	0.994666
A0A3B2WCD2_S951s_1	A0A3B2WCD2_S951s_1	1.06	0.62	1.02	1.24	1.48	0.84	0.97	1.21	0.43	0.89	1.58	1.34	0.18	1.53	1.51	0.94	0.14	0.075	0.055	0.577821	0.812824	0.880343	0.989223	0.997988	0.999507
A0A3Q4EBK4_S301s_1	A0A3Q4EBK4_S301s_1	0.86	1.25	-0.62	-0.32	0.84	0.03	0.94	-0.5	0.7	0.78	-0.95	1.37	-0.37	0.71	-0.48	1.21	0.035	0.1825	-0.025	0.945957	0.766698	0.964635	0.999187	0.997988	0.999507
A0A494B917_S42s_1	A0A494B917_S42s_1	0.33	0.53	0.17	1.36	0.67	0.72	0.78	0.6	0.6	1.25	1.65	1.07	-0.47	0.76	0.26	0.83	0.095	0.545	-0.2525	0.747743	0.150596	0.5367	0.995762	0.997988	0.994666
A0A494BAF6_S191s_1	A0A494BAF6_S191s_1	0.45	-0.22	0.04	-0.58	-0.65	0.42	-0.68	-0.81	-0.22	-0.57	-0.88	-0.36	0.66	-0.19	-0.52	-0.9	-0.3525	-0.43	-0.16	0.337191	0.174965	0.692013	0.989223	0.997988	0.996159
A0A498WGM0_S167s_1	A0A498WGM0_S167s_1	0.29	0.24	-0.47	-0.38	-0.49	1.13	-0.86	0.3	1.53	0.59	-0.17	-0.13	1.93	-0.25	-0.12	0.13	0.1	0.535	0.5025	0.825309	0.236786	0.34062	0.995762	0.997988	0.994666
A0A571BDA2_S895s_1	A0A571BDA2_S895s_1	0.03	0.95	0.39	0.33	0.37	0.38	0.87	0.97	-0.13	0.69	0.48	-0.05	0.03	1.08	0.81	0.38	0.2225	-0.1775	0.15	0.439528	0.571476	0.65843	0.989223	0.997988	0.995259
A0A571BDA2_S971s_1	A0A571BDA2_S971s_1	0.41	0.85	0.97	0.57	1.08	0.54	0.86	0.84	0.45	0.71	0.56	0.94	1.06	0.95	1.02	0.89	0.13	-0.035	0.28	0.586735	0.886574	0.277323	0.989223	0.997988	0.994666
A0A571BEK8_S23s_1	A0A571BEK8_S23s_1	-1.36	-2.62	-1.56	-3.16	-1.62	-0.82	-1.52	-3.17	0.13	-0.48	-1.42	-2.09	0.79	-1.64	-2.08	-1.3	0.3925	1.21	1.1175	0.509204	0.0685523	0.129313	0.989223	0.997988	0.994666
A0A571BGD8_S21s_1	A0A571BGD8_S21s_1	-0.87	-0.51	0.08	-0.29	-0.88	-0.92	0.11	0.18	-0.95	-0.72	0.22	0.32	-0.22	-1.05	-0.03	0.12	0.02	0.115	0.1025	0.955656	0.764238	0.773357	0.999187	0.997988	0.99798
A0A5F8MPK1_S6s_1	A0A5F8MPK1_S6s_1	-0.68	-0.87	-1.16	-1.25	0.02	-0.29	-0.33	-0.77	-0.39	-0.69	-0.64	-0.32	0.36	0.11	-0.45	-0.49	0.6475	0.48	0.8725	0.0302329	0.073071	0.0165907	0.989223	0.997988	0.994666
A0A5F8MQ17_S313s_1	A0A5F8MQ17_S313s_1	-1.13	0.23	-0.31	-0.93	0.19	-0.93	-0.17	-1.16	-0.71	-0.69	-0.73	-0.51	-0.49	0.16	-0.45	-0.29	0.0175	-0.125	0.2675	0.966738	0.710039	0.470271	0.999187	0.997988	0.994666
A0A5F8MQ82_S377s_1	A0A5F8MQ82_S377s_1	-0.73	0.2	0.31	0.83	1.08	-0.22	0.6	0.22	-0.09	0.5	-0.37	0.05	0.05	0.29	0.3	0.75	0.2675	-0.13	0.195	0.516792	0.731039	0.604549	0.989223	0.997988	0.995259
A0A5H1ZRL1_S6s_1	A0A5H1ZRL1_S6s_1	0.68	0.82	0.39	1.16	0	1.04	0.3	1.81	1.03	0.87	1	-0.29	0.91	1.38	0.34	0.72	0.025	-0.11	0.075	0.951872	0.763043	0.813538	0.999187	0.997988	0.999507
A0A6I8MWZ7_S543s_1	A0A6I8MWZ7_S543s_1	-0.35	-0.2	-0.11	-0.29	-0.18	-0.11	-0.28	-0.46	0.03	0.04	0.65	0.32	0.74	-0.02	-0.23	-0.2	-0.02	0.4975	0.31	0.92214	0.0629651	0.310833	0.997335	0.997988	0.994666
A0A7N9VR94_S286s_1	A0A7N9VR94_S286s_1	2.54	1.79	1.48	0.84	1.77	2.32	0.99	1.37	2.86	2.26	0.42	1.69	2.5	0.44	2.04	1.52	-0.05	0.145	-0.0375	0.907031	0.802358	0.943422	0.997038	0.997988	0.999507
A0A7N9VR94_S3383s_1	A0A7N9VR94_S3383s_1	0.19	-0.25	-0.28	0.12	0.53	-0.07	0.58	-0.12	-0.2	0.13	-0.11	-0.16	0.52	0.6	0.41	0.17	0.285	-0.03	0.48	0.302349	0.898104	0.0874639	0.989223	0.997988	0.994666
A0A7N9VR94_S55s_1	A0A7N9VR94_S55s_1	0.59	0.02	0.64	-0.18	1.16	0.28	0.35	0.27	0.28	0.67	-0.52	0.47	0.69	0.89	0.05	0.2	0.2475	-0.0425	0.19	0.439423	0.902767	0.565705	0.989223	0.997988	0.995259
A230065H16Rik_G3UW55_S11s_1	A230065H16Rik_G3UW55_S11s_1	0.05	-0.4	0.34	0.38	-0.18	0.26	0.18	0.51	0.31	-0.15	1.86	-0.08	1.05	0.84	0.48	0.78	0.1	0.3925	0.695	0.713057	0.419945	0.0344998	0.995437	0.997988	0.994666
A2AG58-2_A2AG58_S205s_1	A2AG58-2_A2AG58_S205s_1	0.43	0.42	-0.36	0.04	0.29	-0.03	0.09	0.14	0.13	0.16	0.3	0.31	1.01	0.07	0.36	-0.2	-0.01	0.0925	0.1775	0.968468	0.7225	0.61461	0.999187	0.997988	0.995259
A830010M20Rik_Q3TEG0_T427t_1	A830010M20Rik_Q3TEG0_T427t_1	0.11	0.78	0.89	0.12	0.4	-0.18	-0.39	-0.1	0.35	0.55	0.55	0.36	1.06	0.35	0.25	0.63	-0.5425	-0.0225	0.0975	0.0913452	0.934248	0.762816	0.989223	0.997988	0.9971
Aagab_Q8R2R3_S211s_1	Aagab_Q8R2R3_S211s_1	-1.3	-0.46	-0.64	0.14	-1	-1.35	-0.08	-0.87	-0.62	-0.91	0.36	0.2	0.19	-0.04	-0.17	-0.21	-0.26	0.3225	0.5075	0.507771	0.449735	0.162734	0.989223	0.997988	0.994666
Aak1_Q3UHJ0_S18s_1	Aak1_Q3UHJ0_S18s_1	0.42	-0.02	0.73	0.68	0.26	0.58	0.48	0.6	0.71	0.39	0.26	0.55	0.16	0.34	0.71	0.5	0.0275	0.025	-0.025	0.911429	0.92392	0.929574	0.997335	0.997988	0.999507
Aak1_Q3UHJ0_S21s_1	Aak1_Q3UHJ0_S21s_1	0.31	0.29	0.08	0.42	0.87	0.32	0.52	0.45	-0.05	0.66	-0.38	0.35	0.4	0.07	0.24	0.43	0.265	-0.13	0.01	0.250754	0.651179	0.96681	0.989223	0.997988	0.999507
Aak1_Q3UHJ0_S621s_2	Aak1_Q3UHJ0_S621s_2	-0.5	-0.52	0.27	0.05	-0.27	-0.79	0.21	0.16	-0.68	-0.95	0.32	-0.3	-1.32	-0.05	0	0.15	0.0025	-0.2275	-0.13	0.993766	0.524667	0.746158	0.999278	0.997988	0.9971
Aak1_Q3UHJ0_S622s_1	Aak1_Q3UHJ0_S622s_1	-0.07	0.58	0.67	1.28	1.24	0	0.03	-0.3	-0.04	0.42	0.79	1.09	0.49	0.72	0.79	0.36	-0.3725	-0.05	-0.025	0.382243	0.893768	0.940125	0.989223	0.997988	0.999507
Aak1_Q3UHJ0_S622s_2	Aak1_Q3UHJ0_S622s_2	0.32	0.22	0.16	0.01	0.45	-0.01	0.24	-0.14	0.09	0.19	0.15	-0.1	-0.14	0.54	0.13	0.23	-0.0425	-0.095	0.0125	0.850966	0.6594	0.961285	0.996349	0.997988	0.999507
Aak1_Q3UHJ0_S635s_1	Aak1_Q3UHJ0_S635s_1	-0.54	-1.09	-1.86	-0.83	0.26	-0.15	0.23	-0.26	-1.66	-1.31	-0.33	-1.27	-1.5	-0.32	-1.56	-0.85	1.1	-0.0625	0.0225	0.00706756	0.875592	0.956226	0.989223	0.997988	0.999507
Aak1_Q3UHJ0_S650s_1	Aak1_Q3UHJ0_S650s_1	-0.68	-1.8	-2.26	-1.62	0.66	-0.15	0.02	-1.11	-1.59	-0.99	1.04	-1.83	-1.3	-0.2	-2.32	-1.46	1.445	0.7475	0.27	0.010471	0.276651	0.602165	0.989223	0.997988	0.995259
Aak1_Q3UHJ0_S668s_1	Aak1_Q3UHJ0_S668s_1	-1.34	-0.56	-1.53	-1.97	-1.43	-0.69	-1.96	-1.79	-0.03	-1.2	-1.8	-1.9	0.2	-2.18	-1.67	-1.55	-0.1175	0.1175	0.05	0.765741	0.811317	0.927766	0.995762	0.997988	0.999507
Aak1_Q3UHJ0_S668s_2	Aak1_Q3UHJ0_S668s_2	-1.1	-1.18	-1.26	-2.88	-0.85	-0.33	-1.89	-1.03	0.59	-1.98	-0.38	-1.62	-0.12	-1.79	-1.5	-1.99	0.58	0.7575	0.255	0.256317	0.268282	0.647554	0.989223	0.997988	0.995259
Aak1_Q3UHJ0_S676s_1	Aak1_Q3UHJ0_S676s_1	-0.3	-0.03	-0.43	-0.85	-0.22	1.1	-0.61	-0.37	1.48	0.22	-1.87	-0.57	1.67	-1.25	-0.83	-0.6	0.3775	0.2175	0.15	0.360349	0.740787	0.807541	0.989223	0.997988	0.999507
Aak1_Q3UHJ0_S676s_2	Aak1_Q3UHJ0_S676s_2	-0.44	-0.94	-0.91	-1.45	-0.73	0.59	-1.16	-0.59	1.09	-1.29	-0.56	-0.95	-0.26	-1.11	-0.91	-1.18	0.4625	0.5075	0.07	0.274382	0.349193	0.833724	0.989223	0.997988	0.999507
Aak1_Q3UHJ0_S680s_1	Aak1_Q3UHJ0_S680s_1	0.72	0.69	0.48	0.45	0.52	0.33	0.79	0.5	0.02	0.48	0.22	0.36	-0.48	0.77	-0.05	0.44	-0.05	-0.315	-0.415	0.815343	0.184657	0.223478	0.995762	0.997988	0.994666
Aak1_Q3UHJ0_S729s_1	Aak1_Q3UHJ0_S729s_1	0.14	-0.23	-0.22	0.25	0.22	0.03	0.56	0.06	-0.71	-0.19	-0.33	-0.01	-1.23	0.22	-0.38	-0.2	0.2325	-0.295	-0.3825	0.34361	0.273005	0.297199	0.989223	0.997988	0.994666
Aak1_Q3UHJ0_S795s_1	Aak1_Q3UHJ0_S795s_1	-2.72	-2.52	-2.12	-2.71	-1.56	-2.1	-1.24	-2.98	-3.51	-3.02	0.37	-2.15	-3.12	-1.42	-2.27	-2.64	0.5475	0.44	0.155	0.185135	0.576816	0.695316	0.989223	0.997988	0.996159
Aak1_Q3UHJ0_S848s_1	Aak1_Q3UHJ0_S848s_1	0.61	-0.31	1.31	0.79	0.59	-0.17	0.21	1.09	-0.7	0.57	1.9	0.67	-0.08	0.35	1.17	1.17	-0.17	0.01	0.0525	0.681069	0.986209	0.906603	0.993613	0.997988	0.999507
Aak1_Q3UHJ0_S936s_1	Aak1_Q3UHJ0_S936s_1	0.94	0.66	0.53	0.45	0.46	1.15	0.95	0.74	-0.05	1.18	-0.73	0.9	-0.03	0.04	0.8	0.9	0.18	-0.32	-0.2175	0.467704	0.471727	0.498114	0.989223	0.997988	0.994666
Aak1_Q3UHJ0_T604t_1	Aak1_Q3UHJ0_T604t_1	-0.07	0.92	0.42	0.14	0.67	0.1	-0.04	-0.16	0.36	0.38	0.51	-0.22	0.16	0.79	0.15	-0.01	-0.21	-0.095	-0.08	0.495808	0.756218	0.804621	0.989223	0.997988	0.999507
Aak1_Q3UHJ0_T618t_1	Aak1_Q3UHJ0_T618t_1	0.65	0.83	1.14	1.12	0.33	0.32	0.59	0.49	0.42	0.99	0.97	0.86	1.09	0.87	0.85	0.83	-0.5025	-0.125	-0.025	0.0444155	0.62161	0.91997	0.989223	0.997988	0.999507
Aak1_Q3UHJ0_T618t_2	Aak1_Q3UHJ0_T618t_2	0.15	0.07	0.19	0.02	0.3	-0.17	0.23	-0.04	-0.06	-0.03	0.2	-0.16	-0.36	0.42	0.09	0.2	-0.0275	-0.12	-0.02	0.897581	0.575805	0.939544	0.996493	0.997988	0.999507
Aak1_Q3UHJ0_T672t_2	Aak1_Q3UHJ0_T672t_2	0.1	-0.78	0.05	-0.29	-0.51	1.25	-0.44	-0.05	1.57	-0.94	-0.58	-0.22	-0.27	-0.71	-0.24	-0.37	0.2925	0.1875	-0.1675	0.502095	0.733631	0.573349	0.989223	0.997988	0.995259
Aak1_Q3UHJ0_T679t_1	Aak1_Q3UHJ0_T679t_1	0.72	0.69	0.48	0.45	0.52	0.33	0.79	0.5	0.02	0.48	0.22	0.36	-0.48	0.77	-0.05	0.44	-0.05	-0.315	-0.415	0.815343	0.184657	0.223478	0.995762	0.997988	0.994666
Aatk_B1AZF9_S662s_1	Aatk_B1AZF9_S662s_1	0.13	0.79	1.28	0.26	0.41	-0.19	0.13	0.4	-2.15	0.68	0.28	0.43	-1.1	-1.29	0.27	0.37	-0.4275	-0.805	-1.0525	0.197514	0.23189	0.0539322	0.989223	0.997988	0.994666
Aatk_B1AZF9_S670s_1	Aatk_B1AZF9_S670s_1	-0.08	-2.25	-0.52	0.04	0.22	-0.26	1	-0.55	-0.88	-0.32	-0.84	-1	-1.04	0.26	0.34	0.63	0.805	-0.0575	0.75	0.17773	0.911142	0.224763	0.989223	0.997988	0.994666
Aatk_B1AZF9_S987s_1	Aatk_B1AZF9_S987s_1	-0.4	-0.7	-0.42	-0.4	-0.01	-0.57	0.07	-0.58	-0.42	-0.42	-0.01	-0.69	-0.58	-0.05	0.17	-0.03	0.2075	0.095	0.3575	0.412312	0.695254	0.202554	0.989223	0.997988	0.994666
Abca2_P41234_S2381s_1	Abca2_P41234_S2381s_1	-0.87	-0.08	0.56	-0.41	-0.88	-1.04	0.42	-0.1	-1.72	0.22	-0.48	0.44	-0.86	-2.92	0.25	0.23	-0.2	-0.185	-0.625	0.643456	0.728966	0.393051	0.990258	0.997988	0.994666
Abcb1a_P21447_S667s_1	Abcb1a_P21447_S667s_1	-1.12	-1.87	-2.25	-2.46	-2.7	-0.95	-3.28	-2.52	-1.78	-1.22	-1.42	-3.1	-0.35	-3.13	-2.25	-2.81	-0.4375	0.045	-0.21	0.414453	0.926406	0.73731	0.989223	0.997988	0.9971
Abcc4_E9Q236_T561t_1	Abcc4_E9Q236_T561t_1	0.01	0.93	0.86	1.11	0.35	0.34	0.71	0.55	0.95	1.14	0.36	0.95	0.53	1.12	0.64	0.89	-0.24	0.1225	0.0675	0.417076	0.706817	0.834723	0.989223	0.997988	0.999507
Abcd2_Q61285_S58s_1	Abcd2_Q61285_S58s_1	0.27	0.63	0.93	0.68	0.2	0.5	-0.24	0.39	0.78	1.07	1.12	0.99	1.3	-0.42	0.26	1.19	-0.415	0.3625	-0.045	0.136307	0.155782	0.915793	0.989223	0.997988	0.999507
Abcd3_P55096_S424s_1	Abcd3_P55096_S424s_1	0.72	0.43	0.15	0.47	0.76	0.37	0.87	0.41	0.19	0.54	-0.23	0.91	0.03	0.52	0.43	-0.06	0.16	-0.09	-0.2125	0.506875	0.769164	0.441793	0.989223	0.997988	0.994666
Abcf1_Q6P542_S194s_1	Abcf1_Q6P542_S194s_1	-2.32	-0.72	-0.29	0.17	-1.43	-1.66	-0.29	0.08	-1.01	-1.63	-0.02	-0.09	-1.71	-0.99	0.14	-0.84	-0.035	0.1025	-0.06	0.954499	0.866205	0.920753	0.999187	0.997988	0.999507
Abhd17b_Q7M759_S282s_1	Abhd17b_Q7M759_S282s_1	0.11	0.85	1.21	0.63	0.53	-0.14	0.63	0.24	-0.05	0.45	1.67	1.54	0.41	0.12	1.16	0.19	-0.385	0.2025	-0.23	0.230925	0.660081	0.524316	0.989223	0.997988	0.994666
Abi1_B7ZCU4_S183s_1	Abi1_B7ZCU4_S183s_1	0.44	0.58	0.55	0.5	0.33	0.33	0.27	0.19	0.44	0.84	0.47	0.28	0.72	0.64	0.21	0.33	-0.2375	-0.01	-0.0425	0.237639	0.964615	0.86297	0.989223	0.997988	0.999507
Abi1_B7ZCU4_S222s_1	Abi1_B7ZCU4_S222s_1	-1.09	-2.17	-2.86	-4.45	-1.59	-1.37	-2.16	-2.7	-1	-2.11	-0.98	-2.3	0.56	-2.77	-2.29	-2.19	0.6875	1.045	0.97	0.322938	0.165094	0.298239	0.989223	0.997988	0.994666
Abi1_B7ZCU4_S225s_1	Abi1_B7ZCU4_S225s_1	0.03	-0.17	-0.67	-0.23	-1.11	0.24	-0.4	-0.74	1.39	0.18	-0.09	-0.63	0.56	-0.25	-0.37	-0.69	-0.2425	0.4725	0.0725	0.471552	0.296306	0.831037	0.989223	0.997988	0.999507
Abi1_B7ZCU4_S231s_1	Abi1_B7ZCU4_S231s_1	-2.83	-4.41	-1.47	-2.09	-1.73	-1.98	-1.32	-1.47	-3.25	-3.76	0.47	-1.49	-1.26	-0.99	-1.42	-1.81	1.075	0.6925	1.33	0.0910047	0.500134	0.0488046	0.989223	0.997988	0.994666
Abi2_A0A087WRS3_S191s_1	Abi2_A0A087WRS3_S191s_1	-1.17	-1.29	-2.38	-1.63	-2.69	-1.64	-2.48	-1.58	0.09	-1.85	-3.29	-1.76	1.43	-3.46	-2.54	-2.45	-0.48	-0.085	-0.1375	0.230424	0.899509	0.887882	0.989223	0.997988	0.999507
Abi2_A0A087WRS3_S195s_1	Abi2_A0A087WRS3_S195s_1	-1.91	-2.78	-2.37	-2.18	-2.81	-1.18	-3.95	-2.1	0.25	-1.93	-4.23	-1.92	0.69	-2.96	-2.99	-2.94	-0.2	0.3525	0.26	0.718372	0.672747	0.751947	0.995437	0.997988	0.9971
Abi2_Q6AXH6_S183s_1	Abi2_Q6AXH6_S183s_1	0.46	0.65	0.51	0.68	0.3	0.17	0.43	0.32	0.21	0.62	0.62	0.39	0.51	0.8	0.47	0.39	-0.27	-0.115	-0.0325	0.197864	0.606885	0.891758	0.989223	0.997988	0.999507
Abi2_Q6AXH6_S216s_1	Abi2_Q6AXH6_S216s_1	0.62	-0.79	-0.77	-0.49	-0.93	0.22	-0.77	0.18	-0.74	-1.01	1.63	-1.12	-1.33	0.01	-1.4	-1.49	0.0325	0.0475	-0.695	0.939264	0.942842	0.161697	0.999187	0.997988	0.994666
Abi2_Q6AXH6_S227s_1	Abi2_Q6AXH6_S227s_1	0.39	-0.21	-0.13	-0.5	0.26	0.14	-0.46	-0.11	0.08	-0.11	-0.42	-0.53	0.18	0.25	-0.83	-0.62	0.07	-0.1325	-0.1425	0.802846	0.640855	0.691385	0.995762	0.997988	0.996159
Abl1_P00520_S709s_1	Abl1_P00520_S709s_1	-2.67	-1.56	-3.3	-3.58	-1.64	-3	-3.95	-3.23	0.37	-1.4	-0.48	-2.68	-1.16	-1.23	-2.79	-3.43	-0.1775	1.73	0.625	0.763955	0.0352499	0.350403	0.995762	0.997988	0.994666
Abl1_P00520_S713s_1	Abl1_P00520_S713s_1	-3.73	-2.75	-3.61	-6.8	-2.93	-4.37	-4.82	-5.08	-0.2	-1.51	-2.67	-4.79	-0.03	-2.76	-2.76	-2.78	-0.0775	1.93	2.14	0.929474	0.121334	0.050906	0.997641	0.997988	0.994666
Abl1_P00520_S903s_1	Abl1_P00520_S903s_1	-0.49	-0.62	0.26	0.64	-1.32	-0.93	0.19	0.52	-0.02	0.65	1.05	1.07	-0.72	-0.51	0.53	0.75	-0.3325	0.74	0.065	0.502855	0.0867896	0.88752	0.989223	0.997988	0.999507
Abl1_P00520_Y179y_1	Abl1_P00520_Y179y_1	-0.33	0.26	0.27	0.37	0.35	-0.45	-0.1	0.29	-0.21	-0.01	0.47	-0.32	0.8	0.08	0.54	0.33	-0.12	-0.16	0.295	0.670447	0.577679	0.322984	0.992876	0.997988	0.994666
Abl2_F8VQH0_S632s_1	Abl2_F8VQH0_S632s_1	-1.51	-0.59	-1.64	-0.91	-0.99	-1.4	-0.73	-0.68	-1.77	-1.38	-0.64	-0.5	-1.23	-1.35	-0.57	-0.41	0.2125	0.09	0.2725	0.505215	0.818277	0.461132	0.989223	0.997988	0.994666
Abl2_F8VQH0_S785s_1	Abl2_F8VQH0_S785s_1	-0.45	0.05	0.37	-0.7	0.41	0.01	-0.17	0.26	-0.25	-0.22	0.4	-0.02	-0.02	1.25	-0.05	-0.01	0.31	0.16	0.475	0.313686	0.614315	0.258143	0.989223	0.997988	0.994666
Abl2_F8VQH0_S819s_1	Abl2_F8VQH0_S819s_1	-0.7	0.03	-0.5	-1.91	-0.22	0.1	-0.22	0.02	1.49	0.01	1.22	0.62	2.19	0.26	0.25	-0.14	0.69	1.605	1.41	0.111401	0.00942761	0.0409266	0.989223	0.997988	0.994666
Abl2_F8VQH0_S822s_1	Abl2_F8VQH0_S822s_1	1.66	-0.27	1.29	1.35	0.74	1.53	0.6	1.75	1.43	0.71	1.35	1.63	0.83	1.51	0.88	0.99	0.1475	0.2725	0.045	0.758497	0.555073	0.92007	0.995762	0.997988	0.999507
Abl2_F8VQH0_S936s_1	Abl2_F8VQH0_S936s_1	0.4	-0.84	-0.51	-0.62	0.58	0.5	-0.41	-0.35	-0.55	-0.82	-0.8	0.05	-1.62	0.34	-1.36	0	0.4725	-0.1375	-0.2675	0.226576	0.698734	0.611186	0.989223	0.997988	0.995259
Abl2_F8VQH0_Y439y_1	Abl2_F8VQH0_Y439y_1	0.82	0.49	0.9	0.66	1.1	0.46	0.57	0.77	-0.28	0.69	0.14	0.15	0.45	-0.23	0.32	0.39	0.0075	-0.5425	-0.485	0.974654	0.0732271	0.0974565	0.999187	0.997988	0.994666
Ablim1_E9Q9C4_S304s_1	Ablim1_E9Q9C4_S304s_1	-0.55	-0.65	-1.95	-2.44	-1.17	-0.49	-1.65	-2.25	-0.98	-0.57	1.05	-1.31	0.57	-0.34	-1.59	-2.87	0.0075	0.945	0.34	0.988985	0.16455	0.665594	0.999187	0.997988	0.996159
Ablim1_E9Q9C4_S319s_1	Ablim1_E9Q9C4_S319s_1	-0.28	-0.87	-1.41	-1.08	-0.1	-0.12	-0.21	-1.2	-0.64	-0.29	-1.86	-1.01	-0.31	-0.26	-1.48	-1.83	0.5025	-0.04	-0.06	0.180602	0.921757	0.894671	0.989223	0.997988	0.999507
Ablim1_E9Q9C4_S319s_2	Ablim1_E9Q9C4_S319s_2	1.2	1.59	-0.24	1.05	1.52	0.34	0.58	1.16	1.04	0.86	-0.04	1.33	-1.02	1.1	0.09	0.35	-3.14018e-16	-0.1025	-0.77	1	0.827836	0.18287	1	0.997988	0.994666
Ablim1_E9Q9C4_S378s_1	Ablim1_E9Q9C4_S378s_1	0.68	0.33	0.96	0.41	-0.25	1.1	-0.32	0.26	0.52	0.9	-0.09	0.58	0.83	-1.85	0.07	0.62	-0.3975	-0.1175	-0.6775	0.281349	0.690669	0.257354	0.989223	0.997988	0.994666
Ablim1_E9Q9C4_S383s_1	Ablim1_E9Q9C4_S383s_1	0.99	0.84	0.58	0.32	1.31	0.76	0.87	0.62	1	1.04	0.27	0.64	0.46	1.61	0.49	0.2	0.2075	0.055	0.0075	0.431679	0.845714	0.983702	0.989223	0.997988	1
Ablim1_E9Q9C4_S387s_1	Ablim1_E9Q9C4_S387s_1	1.11	0.8	1.34	0.51	1.06	0.91	0.39	1.37	1.38	1.16	1.14	1.65	-0.6	1.08	1.71	0.93	-0.0075	0.3925	-0.16	0.979941	0.174123	0.747116	0.999187	0.997988	0.9971
Ablim1_E9Q9C4_S404s_1	Ablim1_E9Q9C4_S404s_1	-0.58	-0.39	-0.42	-0.22	-0.08	-0.03	-0.35	-0.08	-0.82	-0.6	0.27	0.09	-0.43	-0.4	-0.39	-0.28	0.2675	0.1375	0.0275	0.219637	0.65736	0.905752	0.989223	0.997988	0.999507
Ablim1_E9Q9C4_S407s_1	Ablim1_E9Q9C4_S407s_1	0.46	-0.61	0.44	0.12	0.29	0.49	0.22	1.05	0.35	0.05	-0.01	0.49	-0.29	0.07	-0.31	0.38	0.41	0.1175	-0.14	0.227079	0.706307	0.678598	0.989223	0.997988	0.996159
Ablim1_E9Q9C4_S410s_1	Ablim1_E9Q9C4_S410s_1	0.57	0.46	0.7	0.08	0.88	0.89	0.38	0.47	0.89	0.84	0.95	0.53	-0.28	0.35	0.8	0.31	0.2025	0.35	-0.1575	0.422268	0.174843	0.615556	0.989223	0.997988	0.995259
Ablim1_E9Q9C4_S425s_1	Ablim1_E9Q9C4_S425s_1	-0.99	-1.04	-1	-0.39	-0.37	-0.6	-0.3	-0.21	0.08	-1.17	-0.31	-0.45	0.35	-0.22	-0.15	-0.93	0.485	0.3925	0.6175	0.0684659	0.251152	0.0953421	0.989223	0.997988	0.994666
Ablim1_E9Q9C4_S442s_1	Ablim1_E9Q9C4_S442s_1	-2.26	-1.12	-0.16	-0.86	0.29	-1.25	-0.64	-1.23	-2.03	-2.03	0.08	-0.27	-1.12	-0.44	-1.32	-1.09	0.3925	0.0375	0.1075	0.454476	0.953756	0.815577	0.989223	0.997988	0.999507
Ablim1_E9Q9C4_S491s_1	Ablim1_E9Q9C4_S491s_1	0.16	0.26	-0.19	0.52	0.44	0.25	0.3	-0.08	0.2	0.37	-0.21	0.24	-1.21	-0.27	0.14	-0.09	0.04	-0.0375	-0.545	0.870176	0.885125	0.150848	0.996493	0.997988	0.994666
Ablim1_E9Q9C4_S492s_1	Ablim1_E9Q9C4_S492s_1	0.34	0.4	0.01	0.68	0.55	0.54	0.59	0.32	0.17	0.36	-0.89	0.67	-0.77	0.65	0.21	0.35	0.1425	-0.28	-0.2475	0.536253	0.459253	0.498327	0.989223	0.997988	0.994666
Ablim1_E9Q9C4_S544s_1	Ablim1_E9Q9C4_S544s_1	0.53	-0.76	-0.69	-0.18	1.2	0.21	-0.31	0.02	-0.93	-0.06	-0.29	0.12	-0.16	0.1	-1.11	-0.19	0.555	-0.015	-0.065	0.206103	0.968488	0.872001	0.989223	0.997988	0.999507
Ablim1_E9Q9C4_S559s_1	Ablim1_E9Q9C4_S559s_1	-0.1	-0.21	-0.14	-0.01	0.63	0.02	0.01	0.17	-0.45	-0.24	-0.05	-0.26	-0.63	0.59	-0.33	0.24	0.3225	-0.135	0.0825	0.180562	0.53384	0.798814	0.989223	0.997988	0.999507
Ablim1_E9Q9C4_S573s_1	Ablim1_E9Q9C4_S573s_1	0.15	0.42	0.37	1.1	0.84	0.46	1.2	0.9	-0.65	0.81	0.95	0.95	-0.71	0.65	0.29	0.8	0.34	0.005	-0.2525	0.25414	0.990691	0.534626	0.989223	0.997988	0.994666
Ablim1_E9Q9C4_S610s_1	Ablim1_E9Q9C4_S610s_1	-1.05	-1.54	-1.76	-1.03	-0.45	-1.66	-0.73	-1.18	-1.72	-0.78	-0.28	-1.59	-1.53	-1.07	-1.25	-1.36	0.34	0.2525	0.0425	0.318562	0.520357	0.880225	0.989223	0.997988	0.999507
[truncated: 10,009 more rows]

## Sheet: Top altered phosphosites
decreased in MNK1KO (logFC>-1.2					increased in MNK1KO (logFC<1.2					decreased in MNK2KO (logFC>-1.2					increased in MNK2KO (logFC<1.2
[truncated: 217 more rows]

## Sheet: GO cellular component
*GO performed using Enrichr with total proteome as background list
[truncated: 18 more rows]

[truncated: 2 more sheets: PTM-SEA cortex, PTM-SEA SYP]
